# Supplementary material for: AcconPred: Predicting Solvent Accessibility and Contact Number Simultaneously by a Multitask Learning Framework under the Conditional Neural Fields Model
Source: Biomed Res Int. 2015 Aug 3;2015:678764. doi: 10.1155/2015/678764 (PMC4538422; doi:10.1155/2015/678764)
Supplement: Supplementary file 1 — Training/testing dataset as well as the CASP11 evaluation dataset could be found in the Supplementary Material. The CASP11 evaluation dataset contains all detailed results from SPINE-X, SANN, ACCpro5 and AcconPred. [file 678764.f1.zip]

Archive with 645 entries (635 files):
- Supplmentary_Files/
- Supplmentary_Files/105_casp11_domain/
- Supplmentary_Files/105_casp11_domain/README.txt
- Supplmentary_Files/105_casp11_domain/casp11_domain_AccPro5/
- Supplmentary_Files/105_casp11_domain/casp11_domain_AccPro5/T0759-D1.reso
- Supplmentary_Files/105_casp11_domain/casp11_domain_AccPro5/T0759-D2.reso
- Supplmentary_Files/105_casp11_domain/casp11_domain_AccPro5/T0760-D1.reso
- Supplmentary_Files/105_casp11_domain/casp11_domain_AccPro5/T0761-D1.reso
- Supplmentary_Files/105_casp11_domain/casp11_domain_AccPro5/T0761-D2.reso
- Supplmentary_Files/105_casp11_domain/casp11_domain_AccPro5/T0762-D1.reso
- Supplmentary_Files/105_casp11_domain/casp11_domain_AccPro5/T0763-D1.reso
- Supplmentary_Files/105_casp11_domain/casp11_domain_AccPro5/T0764-D1.reso
- Supplmentary_Files/105_casp11_domain/casp11_domain_AccPro5/T0765-D1.reso
- Supplmentary_Files/105_casp11_domain/casp11_domain_AccPro5/T0766-D1.reso
- Supplmentary_Files/105_casp11_domain/casp11_domain_AccPro5/T0767-D1.reso
- Supplmentary_Files/105_casp11_domain/casp11_domain_AccPro5/T0767-D2.reso
- Supplmentary_Files/105_casp11_domain/casp11_domain_AccPro5/T0768-D1.reso
- Supplmentary_Files/105_casp11_domain/casp11_domain_AccPro5/T0769-D1.reso
- Supplmentary_Files/105_casp11_domain/casp11_domain_AccPro5/T0770-D1.reso
- Supplmentary_Files/105_casp11_domain/casp11_domain_AccPro5/T0771-D1.reso
- Supplmentary_Files/105_casp11_domain/casp11_domain_AccPro5/T0772-D1.reso
- Supplmentary_Files/105_casp11_domain/casp11_domain_AccPro5/T0773-D1.reso
- Supplmentary_Files/105_casp11_domain/casp11_domain_AccPro5/T0774-D1.reso
- Supplmentary_Files/105_casp11_domain/casp11_domain_AccPro5/T0776-D1.reso
- Supplmentary_Files/105_casp11_domain/casp11_domain_AccPro5/T0777-D1.reso
- Supplmentary_Files/105_casp11_domain/casp11_domain_AccPro5/T0780-D1.reso
- Supplmentary_Files/105_casp11_domain/casp11_domain_AccPro5/T0780-D2.reso
- Supplmentary_Files/105_casp11_domain/casp11_domain_AccPro5/T0781-D1.reso
- Supplmentary_Files/105_casp11_domain/casp11_domain_AccPro5/T0781-D2.reso
- Supplmentary_Files/105_casp11_domain/casp11_domain_AccPro5/T0782-D1.reso
- Supplmentary_Files/105_casp11_domain/casp11_domain_AccPro5/T0783-D1.reso
- Supplmentary_Files/105_casp11_domain/casp11_domain_AccPro5/T0783-D2.reso
- Supplmentary_Files/105_casp11_domain/casp11_domain_AccPro5/T0784-D1.reso
- Supplmentary_Files/105_casp11_domain/casp11_domain_AccPro5/T0785-D1.reso
- Supplmentary_Files/105_casp11_domain/casp11_domain_AccPro5/T0786-D1.reso
- Supplmentary_Files/105_casp11_domain/casp11_domain_AccPro5/T0789-D1.reso
- Supplmentary_Files/105_casp11_domain/casp11_domain_AccPro5/T0789-D2.reso
- Supplmentary_Files/105_casp11_domain/casp11_domain_AccPro5/T0790-D1.reso
- Supplmentary_Files/105_casp11_domain/casp11_domain_AccPro5/T0790-D2.reso
- Supplmentary_Files/105_casp11_domain/casp11_domain_AccPro5/T0791-D1.reso
- Supplmentary_Files/105_casp11_domain/casp11_domain_AccPro5/T0791-D2.reso
- Supplmentary_Files/105_casp11_domain/casp11_domain_AccPro5/T0792-D1.reso
- Supplmentary_Files/105_casp11_domain/casp11_domain_AccPro5/T0794-D1.reso
- Supplmentary_Files/105_casp11_domain/casp11_domain_AccPro5/T0794-D2.reso
- Supplmentary_Files/105_casp11_domain/casp11_domain_AccPro5/T0796-D1.reso
- Supplmentary_Files/105_casp11_domain/casp11_domain_AccPro5/T0800-D1.reso
- Supplmentary_Files/105_casp11_domain/casp11_domain_AccPro5/T0801-D1.reso
- Supplmentary_Files/105_casp11_domain/casp11_domain_AccPro5/T0803-D1.reso
- Supplmentary_Files/105_casp11_domain/casp11_domain_AccPro5/T0805-D1.reso
- Supplmentary_Files/105_casp11_domain/casp11_domain_AccPro5/T0806-D1.reso
- Supplmentary_Files/105_casp11_domain/casp11_domain_AccPro5/T0807-D1.reso
- Supplmentary_Files/105_casp11_domain/casp11_domain_AccPro5/T0808-D1.reso
- Supplmentary_Files/105_casp11_domain/casp11_domain_AccPro5/T0808-D2.reso
- Supplmentary_Files/105_casp11_domain/casp11_domain_AccPro5/T0810-D1.reso
- Supplmentary_Files/105_casp11_domain/casp11_domain_AccPro5/T0810-D2.reso
- Supplmentary_Files/105_casp11_domain/casp11_domain_AccPro5/T0811-D1.reso
- Supplmentary_Files/105_casp11_domain/casp11_domain_AccPro5/T0812-D1.reso
- Supplmentary_Files/105_casp11_domain/casp11_domain_AccPro5/T0813-D1.reso
- Supplmentary_Files/105_casp11_domain/casp11_domain_AccPro5/T0814-D1.reso
- Supplmentary_Files/105_casp11_domain/casp11_domain_AccPro5/T0814-D2.reso
- Supplmentary_Files/105_casp11_domain/casp11_domain_AccPro5/T0814-D3.reso
- Supplmentary_Files/105_casp11_domain/casp11_domain_AccPro5/T0815-D1.reso
- Supplmentary_Files/105_casp11_domain/casp11_domain_AccPro5/T0816-D1.reso
- Supplmentary_Files/105_casp11_domain/casp11_domain_AccPro5/T0817-D1.reso
- Supplmentary_Files/105_casp11_domain/casp11_domain_AccPro5/T0817-D2.reso
- Supplmentary_Files/105_casp11_domain/casp11_domain_AccPro5/T0818-D1.reso
- Supplmentary_Files/105_casp11_domain/casp11_domain_AccPro5/T0819-D1.reso
- Supplmentary_Files/105_casp11_domain/casp11_domain_AccPro5/T0820-D1.reso
- Supplmentary_Files/105_casp11_domain/casp11_domain_AccPro5/T0820-D2.reso
- Supplmentary_Files/105_casp11_domain/casp11_domain_AccPro5/T0821-D1.reso
- Supplmentary_Files/105_casp11_domain/casp11_domain_AccPro5/T0822-D1.reso
- Supplmentary_Files/105_casp11_domain/casp11_domain_AccPro5/T0823-D1.reso
- Supplmentary_Files/105_casp11_domain/casp11_domain_AccPro5/T0824-D1.reso
- Supplmentary_Files/105_casp11_domain/casp11_domain_AccPro5/T0827-D1.reso
- Supplmentary_Files/105_casp11_domain/casp11_domain_AccPro5/T0827-D2.reso
- Supplmentary_Files/105_casp11_domain/casp11_domain_AccPro5/T0829-D1.reso
- Supplmentary_Files/105_casp11_domain/casp11_domain_AccPro5/T0830-D1.reso
- Supplmentary_Files/105_casp11_domain/casp11_domain_AccPro5/T0830-D2.reso
- Supplmentary_Files/105_casp11_domain/casp11_domain_AccPro5/T0831-D1.reso
- Supplmentary_Files/105_casp11_domain/casp11_domain_AccPro5/T0831-D2.reso
- Supplmentary_Files/105_casp11_domain/casp11_domain_AccPro5/T0832-D1.reso
- Supplmentary_Files/105_casp11_domain/casp11_domain_AccPro5/T0833-D1.reso
- Supplmentary_Files/105_casp11_domain/casp11_domain_AccPro5/T0834-D1.reso
- Supplmentary_Files/105_casp11_domain/casp11_domain_AccPro5/T0834-D2.reso
- Supplmentary_Files/105_casp11_domain/casp11_domain_AccPro5/T0835-D1.reso
- Supplmentary_Files/105_casp11_domain/casp11_domain_AccPro5/T0836-D1.reso
- Supplmentary_Files/105_casp11_domain/casp11_domain_AccPro5/T0837-D1.reso
- Supplmentary_Files/105_casp11_domain/casp11_domain_AccPro5/T0838-D1.reso
- Supplmentary_Files/105_casp11_domain/casp11_domain_AccPro5/T0840-D1.reso
- Supplmentary_Files/105_casp11_domain/casp11_domain_AccPro5/T0840-D2.reso
- Supplmentary_Files/105_casp11_domain/casp11_domain_AccPro5/T0841-D1.reso
- Supplmentary_Files/105_casp11_domain/casp11_domain_AccPro5/T0843-D1.reso
- Supplmentary_Files/105_casp11_domain/casp11_domain_AccPro5/T0845-D1.reso
- Supplmentary_Files/105_casp11_domain/casp11_domain_AccPro5/T0845-D2.reso
- Supplmentary_Files/105_casp11_domain/casp11_domain_AccPro5/T0847-D1.reso
- Supplmentary_Files/105_casp11_domain/casp11_domain_AccPro5/T0848-D1.reso
- Supplmentary_Files/105_casp11_domain/casp11_domain_AccPro5/T0848-D2.reso
- Supplmentary_Files/105_casp11_domain/casp11_domain_AccPro5/T0849-D1.reso
- Supplmentary_Files/105_casp11_domain/casp11_domain_AccPro5/T0851-D1.reso
- Supplmentary_Files/105_casp11_domain/casp11_domain_AccPro5/T0852-D1.reso
- Supplmentary_Files/105_casp11_domain/casp11_domain_AccPro5/T0852-D2.reso
- Supplmentary_Files/105_casp11_domain/casp11_domain_AccPro5/T0853-D1.reso
- Supplmentary_Files/105_casp11_domain/casp11_domain_AccPro5/T0853-D2.reso
- Supplmentary_Files/105_casp11_domain/casp11_domain_AccPro5/T0854-D1.reso
- Supplmentary_Files/105_casp11_domain/casp11_domain_AccPro5/T0854-D2.reso
- Supplmentary_Files/105_casp11_domain/casp11_domain_AccPro5/T0855-D1.reso
- Supplmentary_Files/105_casp11_domain/casp11_domain_AccPro5/T0856-D1.reso
- Supplmentary_Files/105_casp11_domain/casp11_domain_AccPro5/T0857-D1.reso
- Supplmentary_Files/105_casp11_domain/casp11_domain_AccPro5/T0858-D1.reso
- Supplmentary_Files/105_casp11_domain/casp11_domain_AcconPred/
- Supplmentary_Files/105_casp11_domain/casp11_domain_AcconPred/T0759-D1.reso
- Supplmentary_Files/105_casp11_domain/casp11_domain_AcconPred/T0759-D2.reso
- Supplmentary_Files/105_casp11_domain/casp11_domain_AcconPred/T0760-D1.reso
- Supplmentary_Files/105_casp11_domain/casp11_domain_AcconPred/T0761-D1.reso
- Supplmentary_Files/105_casp11_domain/casp11_domain_AcconPred/T0761-D2.reso
- Supplmentary_Files/105_casp11_domain/casp11_domain_AcconPred/T0762-D1.reso
- Supplmentary_Files/105_casp11_domain/casp11_domain_AcconPred/T0763-D1.reso
- Supplmentary_Files/105_casp11_domain/casp11_domain_AcconPred/T0764-D1.reso
- Supplmentary_Files/105_casp11_domain/casp11_domain_AcconPred/T0765-D1.reso
- Supplmentary_Files/105_casp11_domain/casp11_domain_AcconPred/T0766-D1.reso
- Supplmentary_Files/105_casp11_domain/casp11_domain_AcconPred/T0767-D1.reso
- Supplmentary_Files/105_casp11_domain/casp11_domain_AcconPred/T0767-D2.reso
- Supplmentary_Files/105_casp11_domain/casp11_domain_AcconPred/T0768-D1.reso
- Supplmentary_Files/105_casp11_domain/casp11_domain_AcconPred/T0769-D1.reso
- Supplmentary_Files/105_casp11_domain/casp11_domain_AcconPred/T0770-D1.reso
- Supplmentary_Files/105_casp11_domain/casp11_domain_AcconPred/T0771-D1.reso
- Supplmentary_Files/105_casp11_domain/casp11_domain_AcconPred/T0772-D1.reso
- Supplmentary_Files/105_casp11_domain/casp11_domain_AcconPred/T0773-D1.reso
- Supplmentary_Files/105_casp11_domain/casp11_domain_AcconPred/T0774-D1.reso
- Supplmentary_Files/105_casp11_domain/casp11_domain_AcconPred/T0776-D1.reso
- Supplmentary_Files/105_casp11_domain/casp11_domain_AcconPred/T0777-D1.reso
- Supplmentary_Files/105_casp11_domain/casp11_domain_AcconPred/T0780-D1.reso
- Supplmentary_Files/105_casp11_domain/casp11_domain_AcconPred/T0780-D2.reso
- Supplmentary_Files/105_casp11_domain/casp11_domain_AcconPred/T0781-D1.reso
- Supplmentary_Files/105_casp11_domain/casp11_domain_AcconPred/T0781-D2.reso
- Supplmentary_Files/105_casp11_domain/casp11_domain_AcconPred/T0782-D1.reso
- Supplmentary_Files/105_casp11_domain/casp11_domain_AcconPred/T0783-D1.reso
- Supplmentary_Files/105_casp11_domain/casp11_domain_AcconPred/T0783-D2.reso
- Supplmentary_Files/105_casp11_domain/casp11_domain_AcconPred/T0784-D1.reso
- Supplmentary_Files/105_casp11_domain/casp11_domain_AcconPred/T0785-D1.reso
- Supplmentary_Files/105_casp11_domain/casp11_domain_AcconPred/T0786-D1.reso
- Supplmentary_Files/105_casp11_domain/casp11_domain_AcconPred/T0789-D1.reso
- Supplmentary_Files/105_casp11_domain/casp11_domain_AcconPred/T0789-D2.reso
- Supplmentary_Files/105_casp11_domain/casp11_domain_AcconPred/T0790-D1.reso
- Supplmentary_Files/105_casp11_domain/casp11_domain_AcconPred/T0790-D2.reso
- Supplmentary_Files/105_casp11_domain/casp11_domain_AcconPred/T0791-D1.reso
- Supplmentary_Files/105_casp11_domain/casp11_domain_AcconPred/T0791-D2.reso
- Supplmentary_Files/105_casp11_domain/casp11_domain_AcconPred/T0792-D1.reso
- Supplmentary_Files/105_casp11_domain/casp11_domain_AcconPred/T0794-D1.reso
- Supplmentary_Files/105_casp11_domain/casp11_domain_AcconPred/T0794-D2.reso
- Supplmentary_Files/105_casp11_domain/casp11_domain_AcconPred/T0796-D1.reso
- Supplmentary_Files/105_casp11_domain/casp11_domain_AcconPred/T0800-D1.reso
- Supplmentary_Files/105_casp11_domain/casp11_domain_AcconPred/T0801-D1.reso
- Supplmentary_Files/105_casp11_domain/casp11_domain_AcconPred/T0803-D1.reso
- Supplmentary_Files/105_casp11_domain/casp11_domain_AcconPred/T0805-D1.reso
- Supplmentary_Files/105_casp11_domain/casp11_domain_AcconPred/T0806-D1.reso
- Supplmentary_Files/105_casp11_domain/casp11_domain_AcconPred/T0807-D1.reso
- Supplmentary_Files/105_casp11_domain/casp11_domain_AcconPred/T0808-D1.reso
- Supplmentary_Files/105_casp11_domain/casp11_domain_AcconPred/T0808-D2.reso
- Supplmentary_Files/105_casp11_domain/casp11_domain_AcconPred/T0810-D1.reso
- Supplmentary_Files/105_casp11_domain/casp11_domain_AcconPred/T0810-D2.reso
- Supplmentary_Files/105_casp11_domain/casp11_domain_AcconPred/T0811-D1.reso
- Supplmentary_Files/105_casp11_domain/casp11_domain_AcconPred/T0812-D1.reso
- Supplmentary_Files/105_casp11_domain/casp11_domain_AcconPred/T0813-D1.reso
- Supplmentary_Files/105_casp11_domain/casp11_domain_AcconPred/T0814-D1.reso
- Supplmentary_Files/105_casp11_domain/casp11_domain_AcconPred/T0814-D2.reso
- Supplmentary_Files/105_casp11_domain/casp11_domain_AcconPred/T0814-D3.reso
- Supplmentary_Files/105_casp11_domain/casp11_domain_AcconPred/T0815-D1.reso
- Supplmentary_Files/105_casp11_domain/casp11_domain_AcconPred/T0816-D1.reso
- Supplmentary_Files/105_casp11_domain/casp11_domain_AcconPred/T0817-D1.reso
- Supplmentary_Files/105_casp11_domain/casp11_domain_AcconPred/T0817-D2.reso
- Supplmentary_Files/105_casp11_domain/casp11_domain_AcconPred/T0818-D1.reso
- Supplmentary_Files/105_casp11_domain/casp11_domain_AcconPred/T0819-D1.reso
- Supplmentary_Files/105_casp11_domain/casp11_domain_AcconPred/T0820-D1.reso
- Supplmentary_Files/105_casp11_domain/casp11_domain_AcconPred/T0820-D2.reso
- Supplmentary_Files/105_casp11_domain/casp11_domain_AcconPred/T0821-D1.reso
- Supplmentary_Files/105_casp11_domain/casp11_domain_AcconPred/T0822-D1.reso
- Supplmentary_Files/105_casp11_domain/casp11_domain_AcconPred/T0823-D1.reso
- Supplmentary_Files/105_casp11_domain/casp11_domain_AcconPred/T0824-D1.reso
- Supplmentary_Files/105_casp11_domain/casp11_domain_AcconPred/T0827-D1.reso
- Supplmentary_Files/105_casp11_domain/casp11_domain_AcconPred/T0827-D2.reso
- Supplmentary_Files/105_casp11_domain/casp11_domain_AcconPred/T0829-D1.reso
- Supplmentary_Files/105_casp11_domain/casp11_domain_AcconPred/T0830-D1.reso
- Supplmentary_Files/105_casp11_domain/casp11_domain_AcconPred/T0830-D2.reso
- Supplmentary_Files/105_casp11_domain/casp11_domain_AcconPred/T0831-D1.reso
- Supplmentary_Files/105_casp11_domain/casp11_domain_AcconPred/T0831-D2.reso
- Supplmentary_Files/105_casp11_domain/casp11_domain_AcconPred/T0832-D1.reso
- Supplmentary_Files/105_casp11_domain/casp11_domain_AcconPred/T0833-D1.reso
- Supplmentary_Files/105_casp11_domain/casp11_domain_AcconPred/T0834-D1.reso
- Supplmentary_Files/105_casp11_domain/casp11_domain_AcconPred/T0834-D2.reso
- Supplmentary_Files/105_casp11_domain/casp11_domain_AcconPred/T0835-D1.reso
- Supplmentary_Files/105_casp11_domain/casp11_domain_AcconPred/T0836-D1.reso
- Supplmentary_Files/105_casp11_domain/casp11_domain_AcconPred/T0837-D1.reso
- Supplmentary_Files/105_casp11_domain/casp11_domain_AcconPred/T0838-D1.reso
- Supplmentary_Files/105_casp11_domain/casp11_domain_AcconPred/T0840-D1.reso
- Supplmentary_Files/105_casp11_domain/casp11_domain_AcconPred/T0840-D2.reso
- Supplmentary_Files/105_casp11_domain/casp11_domain_AcconPred/T0841-D1.reso
- Supplmentary_Files/105_casp11_domain/casp11_domain_AcconPred/T0843-D1.reso
- Supplmentary_Files/105_casp11_domain/casp11_domain_AcconPred/T0845-D1.reso
- Supplmentary_Files/105_casp11_domain/casp11_domain_AcconPred/T0845-D2.reso
- Supplmentary_Files/105_casp11_domain/casp11_domain_AcconPred/T0847-D1.reso
- Supplmentary_Files/105_casp11_domain/casp11_domain_AcconPred/T0848-D1.reso
- Supplmentary_Files/105_casp11_domain/casp11_domain_AcconPred/T0848-D2.reso
- Supplmentary_Files/105_casp11_domain/casp11_domain_AcconPred/T0849-D1.reso
- Supplmentary_Files/105_casp11_domain/casp11_domain_AcconPred/T0851-D1.reso
- Supplmentary_Files/105_casp11_domain/casp11_domain_AcconPred/T0852-D1.reso
- Supplmentary_Files/105_casp11_domain/casp11_domain_AcconPred/T0852-D2.reso
- Supplmentary_Files/105_casp11_domain/casp11_domain_AcconPred/T0853-D1.reso
- Supplmentary_Files/105_casp11_domain/casp11_domain_AcconPred/T0853-D2.reso
- Supplmentary_Files/105_casp11_domain/casp11_domain_AcconPred/T0854-D1.reso
- Supplmentary_Files/105_casp11_domain/casp11_domain_AcconPred/T0854-D2.reso
- Supplmentary_Files/105_casp11_domain/casp11_domain_AcconPred/T0855-D1.reso
- Supplmentary_Files/105_casp11_domain/casp11_domain_AcconPred/T0856-D1.reso
- Supplmentary_Files/105_casp11_domain/casp11_domain_AcconPred/T0857-D1.reso
- Supplmentary_Files/105_casp11_domain/casp11_domain_AcconPred/T0858-D1.reso
- Supplmentary_Files/105_casp11_domain/casp11_domain_SANN/
- Supplmentary_Files/105_casp11_domain/casp11_domain_SANN/T0759-D1.a3
- Supplmentary_Files/105_casp11_domain/casp11_domain_SANN/T0759-D2.a3
- Supplmentary_Files/105_casp11_domain/casp11_domain_SANN/T0760-D1.a3
- Supplmentary_Files/105_casp11_domain/casp11_domain_SANN/T0761-D1.a3
- Supplmentary_Files/105_casp11_domain/casp11_domain_SANN/T0761-D2.a3
- Supplmentary_Files/105_casp11_domain/casp11_domain_SANN/T0762-D1.a3
- Supplmentary_Files/105_casp11_domain/casp11_domain_SANN/T0763-D1.a3
- Supplmentary_Files/105_casp11_domain/casp11_domain_SANN/T0764-D1.a3
- Supplmentary_Files/105_casp11_domain/casp11_domain_SANN/T0765-D1.a3
- Supplmentary_Files/105_casp11_domain/casp11_domain_SANN/T0766-D1.a3
- Supplmentary_Files/105_casp11_domain/casp11_domain_SANN/T0767-D1.a3
- Supplmentary_Files/105_casp11_domain/casp11_domain_SANN/T0767-D2.a3
- Supplmentary_Files/105_casp11_domain/casp11_domain_SANN/T0768-D1.a3
- Supplmentary_Files/105_casp11_domain/casp11_domain_SANN/T0769-D1.a3
- Supplmentary_Files/105_casp11_domain/casp11_domain_SANN/T0770-D1.a3
- Supplmentary_Files/105_casp11_domain/casp11_domain_SANN/T0771-D1.a3
- Supplmentary_Files/105_casp11_domain/casp11_domain_SANN/T0772-D1.a3
- Supplmentary_Files/105_casp11_domain/casp11_domain_SANN/T0773-D1.a3
- Supplmentary_Files/105_casp11_domain/casp11_domain_SANN/T0774-D1.a3
- Supplmentary_Files/105_casp11_domain/casp11_domain_SANN/T0776-D1.a3
- Supplmentary_Files/105_casp11_domain/casp11_domain_SANN/T0777-D1.a3
- Supplmentary_Files/105_casp11_domain/casp11_domain_SANN/T0780-D1.a3
- Supplmentary_Files/105_casp11_domain/casp11_domain_SANN/T0780-D2.a3
- Supplmentary_Files/105_casp11_domain/casp11_domain_SANN/T0781-D1.a3
- Supplmentary_Files/105_casp11_domain/casp11_domain_SANN/T0781-D2.a3
- Supplmentary_Files/105_casp11_domain/casp11_domain_SANN/T0782-D1.a3
- Supplmentary_Files/105_casp11_domain/casp11_domain_SANN/T0783-D1.a3
- Supplmentary_Files/105_casp11_domain/casp11_domain_SANN/T0783-D2.a3
- Supplmentary_Files/105_casp11_domain/casp11_domain_SANN/T0784-D1.a3
- Supplmentary_Files/105_casp11_domain/casp11_domain_SANN/T0785-D1.a3
- Supplmentary_Files/105_casp11_domain/casp11_domain_SANN/T0786-D1.a3
- Supplmentary_Files/105_casp11_domain/casp11_domain_SANN/T0789-D1.a3
- Supplmentary_Files/105_casp11_domain/casp11_domain_SANN/T0789-D2.a3
- Supplmentary_Files/105_casp11_domain/casp11_domain_SANN/T0790-D1.a3
- Supplmentary_Files/105_casp11_domain/casp11_domain_SANN/T0790-D2.a3
- Supplmentary_Files/105_casp11_domain/casp11_domain_SANN/T0791-D1.a3
- Supplmentary_Files/105_casp11_domain/casp11_domain_SANN/T0791-D2.a3
- Supplmentary_Files/105_casp11_domain/casp11_domain_SANN/T0792-D1.a3
- Supplmentary_Files/105_casp11_domain/casp11_domain_SANN/T0794-D1.a3
- Supplmentary_Files/105_casp11_domain/casp11_domain_SANN/T0794-D2.a3
- Supplmentary_Files/105_casp11_domain/casp11_domain_SANN/T0796-D1.a3
- Supplmentary_Files/105_casp11_domain/casp11_domain_SANN/T0800-D1.a3
- Supplmentary_Files/105_casp11_domain/casp11_domain_SANN/T0801-D1.a3
- Supplmentary_Files/105_casp11_domain/casp11_domain_SANN/T0803-D1.a3
- Supplmentary_Files/105_casp11_domain/casp11_domain_SANN/T0805-D1.a3
- Supplmentary_Files/105_casp11_domain/casp11_domain_SANN/T0806-D1.a3
- Supplmentary_Files/105_casp11_domain/casp11_domain_SANN/T0807-D1.a3
- Supplmentary_Files/105_casp11_domain/casp11_domain_SANN/T0808-D1.a3
- Supplmentary_Files/105_casp11_domain/casp11_domain_SANN/T0808-D2.a3
- Supplmentary_Files/105_casp11_domain/casp11_domain_SANN/T0810-D1.a3
- Supplmentary_Files/105_casp11_domain/casp11_domain_SANN/T0810-D2.a3
- Supplmentary_Files/105_casp11_domain/casp11_domain_SANN/T0811-D1.a3
- Supplmentary_Files/105_casp11_domain/casp11_domain_SANN/T0812-D1.a3
- Supplmentary_Files/105_casp11_domain/casp11_domain_SANN/T0813-D1.a3
- Supplmentary_Files/105_casp11_domain/casp11_domain_SANN/T0814-D1.a3
- Supplmentary_Files/105_casp11_domain/casp11_domain_SANN/T0814-D2.a3
- Supplmentary_Files/105_casp11_domain/casp11_domain_SANN/T0814-D3.a3
- Supplmentary_Files/105_casp11_domain/casp11_domain_SANN/T0815-D1.a3
- Supplmentary_Files/105_casp11_domain/casp11_domain_SANN/T0816-D1.a3
- Supplmentary_Files/105_casp11_domain/casp11_domain_SANN/T0817-D1.a3
- Supplmentary_Files/105_casp11_domain/casp11_domain_SANN/T0817-D2.a3
- Supplmentary_Files/105_casp11_domain/casp11_domain_SANN/T0818-D1.a3
- Supplmentary_Files/105_casp11_domain/casp11_domain_SANN/T0819-D1.a3
- Supplmentary_Files/105_casp11_domain/casp11_domain_SANN/T0820-D1.a3
- Supplmentary_Files/105_casp11_domain/casp11_domain_SANN/T0820-D2.a3
- Supplmentary_Files/105_casp11_domain/casp11_domain_SANN/T0821-D1.a3
- Supplmentary_Files/105_casp11_domain/casp11_domain_SANN/T0822-D1.a3
- Supplmentary_Files/105_casp11_domain/casp11_domain_SANN/T0823-D1.a3
- Supplmentary_Files/105_casp11_domain/casp11_domain_SANN/T0824-D1.a3
- Supplmentary_Files/105_casp11_domain/casp11_domain_SANN/T0827-D1.a3
- Supplmentary_Files/105_casp11_domain/casp11_domain_SANN/T0827-D2.a3
- Supplmentary_Files/105_casp11_domain/casp11_domain_SANN/T0829-D1.a3
- Supplmentary_Files/105_casp11_domain/casp11_domain_SANN/T0830-D1.a3
- Supplmentary_Files/105_casp11_domain/casp11_domain_SANN/T0830-D2.a3
- Supplmentary_Files/105_casp11_domain/casp11_domain_SANN/T0831-D1.a3
- Supplmentary_Files/105_casp11_domain/casp11_domain_SANN/T0831-D2.a3
- Supplmentary_Files/105_casp11_domain/casp11_domain_SANN/T0832-D1.a3
- Supplmentary_Files/105_casp11_domain/casp11_domain_SANN/T0833-D1.a3
- Supplmentary_Files/105_casp11_domain/casp11_domain_SANN/T0834-D1.a3
- Supplmentary_Files/105_casp11_domain/casp11_domain_SANN/T0834-D2.a3
- Supplmentary_Files/105_casp11_domain/casp11_domain_SANN/T0835-D1.a3
- Supplmentary_Files/105_casp11_domain/casp11_domain_SANN/T0836-D1.a3
- Supplmentary_Files/105_casp11_domain/casp11_domain_SANN/T0837-D1.a3
- Supplmentary_Files/105_casp11_domain/casp11_domain_SANN/T0838-D1.a3
[truncated: 345 more entries]
