# Supplementary material for: AcconPred: Predicting Solvent Accessibility and Contact Number Simultaneously by a Multitask Learning Framework under the Conditional Neural Fields Model
Source: Biomed Res Int. 2015 Aug 3;2015:678764. doi: 10.1155/2015/678764 (PMC4538422; doi:10.1155/2015/678764)
Supplement: Supplementary file 1 — Training/testing dataset as well as the CASP11 evaluation dataset could be found in the Supplementary Material. The CASP11 evaluation dataset contains all detailed results from SPINE-X, SANN, ACCpro5 and AcconPred. [file 678764.f1.zip › Supplmentary_Files/105_casp11_domain/casp11_domain_AcconPred/T0759-D1.reso]

# AcconPred: three-state solvent accessibility prediction results 
# probabilities are in the order of B (Bury, pACC: 0-10), M (Medium, pACC: 11-40) and E (Exposed, pACC: 41-100), 
# where pACC is the relative solvent accessibility value calculated by DSSP 
# output format: <position> <one letter amino acid> <predicted label> ... <probabilities> ... -> <maximal probability> 

 1 V E 0.056652 0.154210 0.789138 -> 0.789138 
 2 V E 0.084121 0.282259 0.633620 -> 0.633620 
 3 I M 0.132807 0.455012 0.412182 -> 0.455012 
 4 H E 0.089946 0.447150 0.462905 -> 0.462905 
 5 P E 0.119482 0.356541 0.523978 -> 0.523978 
 6 D E 0.034130 0.306774 0.659097 -> 0.659097 
 7 P E 0.019642 0.137512 0.842847 -> 0.842847 
 8 G E 0.044760 0.220845 0.734395 -> 0.734395 
 9 R E 0.016823 0.240126 0.743051 -> 0.743051 
 10 E E 0.014323 0.141678 0.843999 -> 0.843999 
 11 L M 0.266090 0.656712 0.077199 -> 0.656712 
 12 S E 0.047012 0.411501 0.541488 -> 0.541488 
 13 P E 0.038595 0.283642 0.677764 -> 0.677764 
 14 E E 0.006028 0.092680 0.901292 -> 0.901292 
 15 E M 0.110102 0.556469 0.333429 -> 0.556469 
 16 A B 0.742338 0.157133 0.100530 -> 0.742338 
 17 H E 0.030087 0.360186 0.609727 -> 0.609727 
 18 R E 0.005800 0.198385 0.795815 -> 0.795815 
 19 A M 0.355847 0.405066 0.239087 -> 0.405066 
 20 G E 0.339954 0.296254 0.363792 -> 0.363792 
 21 L B 0.616860 0.312349 0.070790 -> 0.616860 
 22 I B 0.530211 0.310494 0.159295 -> 0.530211 
 23 D M 0.278123 0.469224 0.252653 -> 0.469224 
 24 W B 0.540920 0.388446 0.070634 -> 0.540920 
 25 N M 0.250836 0.454533 0.294631 -> 0.454533 
 26 M B 0.499122 0.337962 0.162916 -> 0.499122 
 27 F B 0.751381 0.205469 0.043150 -> 0.751381 
 28 V B 0.431053 0.393428 0.175519 -> 0.431053 
 29 K E 0.017982 0.316143 0.665875 -> 0.665875 
 30 L M 0.365241 0.401006 0.233753 -> 0.401006 
 31 R E 0.022284 0.324336 0.653379 -> 0.653379 
 32 S E 0.010202 0.150107 0.839691 -> 0.839691 
 33 Q E 0.003839 0.114061 0.882100 -> 0.882100 
 34 E E 0.002348 0.036233 0.961419 -> 0.961419 
