# Supplementary material for: AcconPred: Predicting Solvent Accessibility and Contact Number Simultaneously by a Multitask Learning Framework under the Conditional Neural Fields Model
Source: Biomed Res Int. 2015 Aug 3;2015:678764. doi: 10.1155/2015/678764 (PMC4538422; doi:10.1155/2015/678764)
Supplement: Supplementary file 1 — Training/testing dataset as well as the CASP11 evaluation dataset could be found in the Supplementary Material. The CASP11 evaluation dataset contains all detailed results from SPINE-X, SANN, ACCpro5 and AcconPred. [file 678764.f1.zip › Supplmentary_Files/105_casp11_domain/casp11_domain_AcconPred/T0759-D2.reso]

# AcconPred: three-state solvent accessibility prediction results 
# probabilities are in the order of B (Bury, pACC: 0-10), M (Medium, pACC: 11-40) and E (Exposed, pACC: 41-100), 
# where pACC is the relative solvent accessibility value calculated by DSSP 
# output format: <position> <one letter amino acid> <predicted label> ... <probabilities> ... -> <maximal probability> 

 1 C E 0.014499 0.086973 0.898528 -> 0.898528 
 2 D E 0.006770 0.097041 0.896189 -> 0.896189 
 3 W M 0.153373 0.616858 0.229770 -> 0.616858 
 4 E E 0.030527 0.245185 0.724289 -> 0.724289 
 5 E E 0.033281 0.283907 0.682812 -> 0.682812 
 6 I M 0.363386 0.573459 0.063155 -> 0.573459 
 7 S M 0.114799 0.469334 0.415867 -> 0.469334 
 8 V M 0.386867 0.496469 0.116664 -> 0.496469 
 9 K E 0.006144 0.163586 0.830270 -> 0.830270 
 10 G M 0.393185 0.452057 0.154758 -> 0.452057 
 11 P E 0.105482 0.329780 0.564738 -> 0.564738 
 12 N E 0.011670 0.095458 0.892872 -> 0.892872 
 13 G E 0.131802 0.415836 0.452362 -> 0.452362 
 14 E E 0.013722 0.200473 0.785805 -> 0.785805 
 15 S M 0.173728 0.459194 0.367078 -> 0.459194 
 16 S M 0.325277 0.546461 0.128262 -> 0.546461 
 17 V B 0.428867 0.427793 0.143339 -> 0.428867 
 18 I B 0.539066 0.378200 0.082733 -> 0.539066 
 19 H M 0.223806 0.576769 0.199425 -> 0.576769 
 20 D B 0.493074 0.380958 0.125969 -> 0.493074 
 21 R E 0.067198 0.440145 0.492657 -> 0.492657 
 22 K E 0.008899 0.146410 0.844691 -> 0.844691 
 23 S E 0.039731 0.232864 0.727405 -> 0.727405 
 24 G E 0.096149 0.293697 0.610155 -> 0.610155 
 25 K E 0.008353 0.167480 0.824167 -> 0.824167 
 26 K E 0.008944 0.189999 0.801057 -> 0.801057 
 27 F M 0.379705 0.581566 0.038729 -> 0.581566 
 28 S M 0.070483 0.493876 0.435641 -> 0.493876 
 29 I B 0.603507 0.364779 0.031714 -> 0.603507 
 30 E E 0.008224 0.257318 0.734458 -> 0.734458 
 31 E M 0.025031 0.497264 0.477705 -> 0.497264 
 32 A B 0.941906 0.051558 0.006537 -> 0.941906 
 33 L M 0.385038 0.566914 0.048048 -> 0.566914 
 34 Q E 0.002156 0.089826 0.908018 -> 0.908018 
 35 S E 0.010007 0.228770 0.761223 -> 0.761223 
 36 G E 0.042346 0.230585 0.727070 -> 0.727070 
 37 R M 0.075643 0.472680 0.451677 -> 0.472680 
 38 L B 0.709113 0.276377 0.014510 -> 0.709113 
 39 T E 0.043732 0.439287 0.516981 -> 0.516981 
 40 P E 0.029096 0.311683 0.659222 -> 0.659222 
 41 A E 0.015177 0.169107 0.815716 -> 0.815716 
 42 H M 0.090253 0.584535 0.325213 -> 0.584535 
 43 Y B 0.498061 0.441404 0.060535 -> 0.498061 
 44 D E 0.019408 0.259007 0.721584 -> 0.721584 
 45 R E 0.015973 0.290660 0.693367 -> 0.693367 
 46 Y M 0.457055 0.494736 0.048209 -> 0.494736 
 47 V M 0.152613 0.554079 0.293308 -> 0.554079 
 48 N E 0.012268 0.118496 0.869236 -> 0.869236 
 49 K E 0.003616 0.134980 0.861404 -> 0.861404 
 50 D E 0.015655 0.203607 0.780738 -> 0.780738 
 51 M B 0.698489 0.279860 0.021651 -> 0.698489 
 52 S M 0.301593 0.579877 0.118530 -> 0.579877 
 53 I B 0.714637 0.265156 0.020206 -> 0.714637 
 54 Q M 0.113007 0.484127 0.402866 -> 0.484127 
 55 E M 0.106828 0.515079 0.378093 -> 0.515079 
 56 L B 0.941266 0.037960 0.020773 -> 0.941266 
 57 A B 0.757412 0.192909 0.049680 -> 0.757412 
 58 V E 0.088541 0.341147 0.570312 -> 0.570312 
 59 L M 0.118474 0.447803 0.433723 -> 0.447803 
 60 V M 0.332677 0.465974 0.201349 -> 0.465974 
 61 S E 0.032414 0.174774 0.792812 -> 0.792812 
 62 G E 0.001822 0.024030 0.974148 -> 0.974148 
