# Supplementary material for: AcconPred: Predicting Solvent Accessibility and Contact Number Simultaneously by a Multitask Learning Framework under the Conditional Neural Fields Model
Source: Biomed Res Int. 2015 Aug 3;2015:678764. doi: 10.1155/2015/678764 (PMC4538422; doi:10.1155/2015/678764)
Supplement: Supplementary file 1 — Training/testing dataset as well as the CASP11 evaluation dataset could be found in the Supplementary Material. The CASP11 evaluation dataset contains all detailed results from SPINE-X, SANN, ACCpro5 and AcconPred. [file 678764.f1.zip › Supplmentary_Files/105_casp11_domain/casp11_domain_AcconPred/T0760-D1.reso]

# AcconPred: three-state solvent accessibility prediction results 
# probabilities are in the order of B (Bury, pACC: 0-10), M (Medium, pACC: 11-40) and E (Exposed, pACC: 41-100), 
# where pACC is the relative solvent accessibility value calculated by DSSP 
# output format: <position> <one letter amino acid> <predicted label> ... <probabilities> ... -> <maximal probability> 

 1 S E 0.006668 0.056042 0.937289 -> 0.937289 
 2 R E 0.021680 0.233501 0.744819 -> 0.744819 
 3 S M 0.144270 0.530392 0.325339 -> 0.530392 
 4 L B 0.596413 0.362534 0.041054 -> 0.596413 
 5 V B 0.567398 0.388966 0.043636 -> 0.567398 
 6 I B 0.878786 0.116208 0.005006 -> 0.878786 
 7 S B 0.825027 0.149220 0.025753 -> 0.825027 
 8 T B 0.700180 0.258912 0.040908 -> 0.700180 
 9 I B 0.770483 0.222218 0.007299 -> 0.770483 
 10 N M 0.063241 0.571163 0.365597 -> 0.571163 
 11 Q E 0.047188 0.438229 0.514583 -> 0.514583 
 12 I M 0.303577 0.590652 0.105770 -> 0.590652 
 13 S M 0.262497 0.575123 0.162380 -> 0.575123 
 14 E E 0.005380 0.072718 0.921902 -> 0.921902 
 15 D E 0.013292 0.190208 0.796499 -> 0.796499 
 16 S E 0.049101 0.324288 0.626612 -> 0.626612 
 17 K E 0.009375 0.232390 0.758236 -> 0.758236 
 18 E M 0.116872 0.574736 0.308392 -> 0.574736 
 19 F B 0.506636 0.463019 0.030345 -> 0.506636 
 20 Y M 0.272058 0.642060 0.085882 -> 0.642060 
 21 F B 0.950773 0.046881 0.002346 -> 0.950773 
 22 T M 0.295427 0.615432 0.089140 -> 0.615432 
 23 L B 0.800382 0.184104 0.015513 -> 0.800382 
 24 D M 0.327450 0.564450 0.108100 -> 0.564450 
 25 N E 0.011373 0.135597 0.853030 -> 0.853030 
 26 G E 0.025931 0.254862 0.719206 -> 0.719206 
 27 K E 0.004496 0.196810 0.798694 -> 0.798694 
 28 T M 0.176172 0.597707 0.226120 -> 0.597707 
 29 M B 0.887110 0.107215 0.005675 -> 0.887110 
 30 F M 0.305231 0.613781 0.080989 -> 0.613781 
 31 P B 0.838584 0.131537 0.029879 -> 0.838584 
 32 S B 0.569687 0.340634 0.089679 -> 0.569687 
 33 N M 0.355125 0.416071 0.228805 -> 0.416071 
 34 S M 0.337034 0.454393 0.208573 -> 0.454393 
 35 Q E 0.074825 0.325049 0.600127 -> 0.600127 
 36 A E 0.105438 0.317888 0.576674 -> 0.576674 
 37 W M 0.304339 0.494567 0.201095 -> 0.494567 
 38 G E 0.104427 0.313137 0.582436 -> 0.582436 
 39 G E 0.052628 0.231141 0.716231 -> 0.716231 
 40 E E 0.037060 0.401335 0.561605 -> 0.561605 
 41 K E 0.007183 0.163748 0.829070 -> 0.829070 
 42 F M 0.358623 0.532936 0.108440 -> 0.532936 
 43 E E 0.028001 0.280021 0.691978 -> 0.691978 
 44 N E 0.035426 0.265111 0.699463 -> 0.699463 
 45 G M 0.317316 0.441994 0.240689 -> 0.441994 
 46 Q M 0.420650 0.509988 0.069362 -> 0.509988 
 47 R B 0.574556 0.393004 0.032440 -> 0.574556 
 48 A B 0.989014 0.010216 0.000770 -> 0.989014 
 49 F B 0.943674 0.054782 0.001544 -> 0.943674 
 50 V B 0.982949 0.015981 0.001069 -> 0.982949 
 51 I B 0.622969 0.355154 0.021876 -> 0.622969 
 52 F B 0.923164 0.072813 0.004023 -> 0.923164 
 53 N M 0.194834 0.675141 0.130025 -> 0.675141 
 54 E M 0.053329 0.501070 0.445602 -> 0.501070 
 55 L M 0.265190 0.603107 0.131704 -> 0.603107 
 56 E E 0.025636 0.235343 0.739021 -> 0.739021 
 57 Q E 0.021587 0.247641 0.730773 -> 0.730773 
 58 P E 0.015406 0.155002 0.829592 -> 0.829592 
 59 V E 0.074549 0.356192 0.569258 -> 0.569258 
 60 N E 0.011080 0.109610 0.879310 -> 0.879310 
 61 G E 0.034896 0.182392 0.782712 -> 0.782712 
 62 Y M 0.150572 0.648827 0.200601 -> 0.648827 
 63 D E 0.062550 0.431204 0.506246 -> 0.506246 
 64 Y M 0.222040 0.658849 0.119110 -> 0.658849 
 65 N M 0.317073 0.541909 0.141018 -> 0.541909 
 66 I B 0.961849 0.036335 0.001816 -> 0.961849 
 67 Q M 0.298535 0.602287 0.099178 -> 0.602287 
 68 V B 0.936615 0.060902 0.002483 -> 0.936615 
 69 R M 0.167185 0.650145 0.182670 -> 0.650145 
 70 D M 0.393163 0.447074 0.159763 -> 0.447074 
 71 I B 0.733865 0.239245 0.026890 -> 0.733865 
 72 T M 0.162118 0.605114 0.232768 -> 0.605114 
 73 K E 0.045156 0.342670 0.612175 -> 0.612175 
 74 V B 0.765630 0.210242 0.024128 -> 0.765630 
 75 L M 0.303733 0.627289 0.068978 -> 0.627289 
 76 T B 0.704374 0.238165 0.057461 -> 0.704374 
 77 K E 0.060308 0.429996 0.509697 -> 0.509697 
 78 E E 0.004759 0.125613 0.869628 -> 0.869628 
 79 I M 0.397816 0.547552 0.054632 -> 0.547552 
 80 V M 0.058380 0.504086 0.437534 -> 0.504086 
 81 T E 0.032628 0.266450 0.700922 -> 0.700922 
 82 M M 0.386818 0.539543 0.073639 -> 0.539543 
 83 D E 0.012676 0.247608 0.739716 -> 0.739716 
 84 D E 0.014199 0.190370 0.795431 -> 0.795431 
 85 E E 0.009082 0.113187 0.877730 -> 0.877730 
 86 E E 0.010822 0.113246 0.875933 -> 0.875933 
 87 N M 0.089997 0.502652 0.407351 -> 0.502652 
 88 T M 0.157302 0.532873 0.309826 -> 0.532873 
 89 E E 0.017349 0.252872 0.729778 -> 0.729778 
 90 E E 0.009692 0.145001 0.845307 -> 0.845307 
 91 K E 0.012828 0.157598 0.829574 -> 0.829574 
 92 I B 0.573838 0.379449 0.046713 -> 0.573838 
 93 G E 0.073460 0.347500 0.579041 -> 0.579041 
 94 D E 0.076517 0.401678 0.521806 -> 0.521806 
 95 D M 0.391083 0.471899 0.137017 -> 0.471899 
 96 K E 0.026985 0.398462 0.574552 -> 0.574552 
 97 I B 0.932832 0.063276 0.003892 -> 0.932832 
 98 N M 0.363347 0.551605 0.085048 -> 0.551605 
 99 A B 0.938113 0.058510 0.003376 -> 0.938113 
 100 T M 0.365216 0.563939 0.070844 -> 0.563939 
 101 Y M 0.239011 0.579499 0.181490 -> 0.579499 
 102 M B 0.715674 0.249732 0.034593 -> 0.715674 
 103 W B 0.502372 0.429431 0.068197 -> 0.502372 
 104 I B 0.760856 0.212172 0.026972 -> 0.760856 
 105 S B 0.806848 0.178764 0.014388 -> 0.806848 
 106 K E 0.025104 0.331657 0.643239 -> 0.643239 
 107 D E 0.016764 0.229721 0.753515 -> 0.753515 
 108 K E 0.020180 0.337932 0.641888 -> 0.641888 
 109 K E 0.042085 0.436855 0.521061 -> 0.521061 
 110 Y M 0.445030 0.521633 0.033336 -> 0.521633 
 111 L B 0.945526 0.050120 0.004354 -> 0.945526 
 112 T B 0.787295 0.188407 0.024299 -> 0.787295 
 113 I B 0.992364 0.006836 0.000800 -> 0.992364 
 114 E M 0.445366 0.526376 0.028258 -> 0.526376 
 115 F B 0.965796 0.031693 0.002511 -> 0.965796 
 116 Q B 0.527548 0.443647 0.028805 -> 0.527548 
 117 Y B 0.747145 0.244193 0.008662 -> 0.747145 
 118 Y M 0.177643 0.665401 0.156956 -> 0.665401 
 119 S B 0.469514 0.445389 0.085097 -> 0.469514 
 120 T E 0.029278 0.274250 0.696472 -> 0.696472 
 121 H E 0.032147 0.365450 0.602403 -> 0.602403 
 122 S M 0.212651 0.459830 0.327518 -> 0.459830 
 123 E E 0.003167 0.077692 0.919141 -> 0.919141 
 124 D E 0.013192 0.141845 0.844963 -> 0.844963 
 125 K E 0.022258 0.456268 0.521474 -> 0.521474 
 126 K E 0.041549 0.343379 0.615072 -> 0.615072 
 127 H B 0.581171 0.388334 0.030495 -> 0.581171 
 128 F M 0.371703 0.557142 0.071155 -> 0.557142 
 129 L B 0.948070 0.048763 0.003167 -> 0.948070 
 130 N B 0.642302 0.324672 0.033027 -> 0.642302 
 131 L B 0.918722 0.074480 0.006798 -> 0.918722 
 132 V B 0.746793 0.236599 0.016608 -> 0.746793 
 133 I M 0.413294 0.514473 0.072233 -> 0.514473 
 134 N M 0.144393 0.547540 0.308067 -> 0.547540 
 135 N E 0.045579 0.345531 0.608890 -> 0.608890 
 136 K E 0.006190 0.140988 0.852822 -> 0.852822 
 137 D E 0.016630 0.175225 0.808145 -> 0.808145 
 138 N E 0.045818 0.363932 0.590250 -> 0.590250 
 139 T E 0.033711 0.275189 0.691101 -> 0.691101 
 140 D E 0.011177 0.115475 0.873347 -> 0.873347 
 141 D E 0.024587 0.322220 0.653193 -> 0.653193 
 142 E E 0.018845 0.296146 0.685010 -> 0.685010 
 143 Y M 0.113454 0.754645 0.131901 -> 0.754645 
 144 I B 0.851998 0.141958 0.006044 -> 0.851998 
 145 N M 0.237497 0.703044 0.059459 -> 0.703044 
 146 L B 0.973506 0.024642 0.001851 -> 0.973506 
 147 E B 0.626134 0.353224 0.020642 -> 0.626134 
 148 F B 0.980837 0.018266 0.000897 -> 0.980837 
 149 R M 0.458329 0.504209 0.037462 -> 0.504209 
 150 H B 0.815626 0.170986 0.013389 -> 0.815626 
 151 N B 0.459548 0.455547 0.084905 -> 0.459548 
 152 S B 0.501114 0.366844 0.132042 -> 0.501114 
 153 E E 0.037183 0.267285 0.695533 -> 0.695533 
 154 R E 0.020947 0.262425 0.716628 -> 0.716628 
 155 D M 0.318977 0.521401 0.159622 -> 0.521401 
 156 S M 0.277288 0.417752 0.304960 -> 0.417752 
 157 P E 0.060395 0.322438 0.617167 -> 0.617167 
 158 D E 0.085370 0.288922 0.625708 -> 0.625708 
 159 H M 0.309440 0.533206 0.157354 -> 0.533206 
 160 L E 0.181426 0.345614 0.472960 -> 0.472960 
 161 G M 0.379740 0.473007 0.147252 -> 0.473007 
 162 E M 0.100853 0.590488 0.308659 -> 0.590488 
 163 G B 0.940347 0.057065 0.002589 -> 0.940347 
 164 Y B 0.496698 0.495740 0.007562 -> 0.496698 
 165 V B 0.989121 0.009641 0.001238 -> 0.989121 
 166 S B 0.916245 0.075722 0.008033 -> 0.916245 
 167 F B 0.975339 0.023993 0.000668 -> 0.975339 
 168 K M 0.024925 0.633217 0.341858 -> 0.633217 
 169 L B 0.941750 0.054810 0.003440 -> 0.941750 
 170 D E 0.010712 0.322117 0.667170 -> 0.667170 
 171 K E 0.003918 0.194644 0.801437 -> 0.801437 
 172 I B 0.837636 0.158431 0.003933 -> 0.837636 
 173 E E 0.024253 0.440547 0.535200 -> 0.535200 
 174 E E 0.010684 0.124924 0.864392 -> 0.864392 
 175 Q E 0.008552 0.208063 0.783385 -> 0.783385 
 176 I M 0.308187 0.539065 0.152748 -> 0.539065 
 177 E E 0.004853 0.083880 0.911267 -> 0.911267 
 178 G E 0.004776 0.095975 0.899249 -> 0.899249 
 179 K E 0.016790 0.292411 0.690799 -> 0.690799 
 180 K E 0.059030 0.464660 0.476310 -> 0.476310 
 181 G B 0.535735 0.412342 0.051923 -> 0.535735 
 182 L B 0.975375 0.022668 0.001956 -> 0.975375 
 183 N M 0.270661 0.683844 0.045495 -> 0.683844 
 184 I B 0.985107 0.014635 0.000258 -> 0.985107 
 185 R M 0.087163 0.780849 0.131988 -> 0.780849 
 186 V B 0.943772 0.055062 0.001166 -> 0.943772 
 187 R M 0.081806 0.738599 0.179595 -> 0.738599 
 188 T B 0.764450 0.210972 0.024578 -> 0.764450 
 189 L M 0.242474 0.558930 0.198596 -> 0.558930 
 190 Y E 0.041980 0.368391 0.589629 -> 0.589629 
 191 D E 0.008133 0.080873 0.910994 -> 0.910994 
 192 G E 0.024301 0.305703 0.669996 -> 0.669996 
 193 I M 0.082598 0.511979 0.405423 -> 0.511979 
 194 K E 0.007600 0.285479 0.706921 -> 0.706921 
 195 N E 0.023714 0.329938 0.646348 -> 0.646348 
 196 Y M 0.178621 0.799717 0.021662 -> 0.799717 
 197 K E 0.001981 0.164611 0.833407 -> 0.833407 
 198 V B 0.766528 0.221820 0.011652 -> 0.766528 
 199 Q E 0.003025 0.144355 0.852620 -> 0.852620 
 200 F M 0.394730 0.537029 0.068241 -> 0.537029 
 201 P E 0.007561 0.075737 0.916703 -> 0.916703 
