# Supplementary material for: AcconPred: Predicting Solvent Accessibility and Contact Number Simultaneously by a Multitask Learning Framework under the Conditional Neural Fields Model
Source: Biomed Res Int. 2015 Aug 3;2015:678764. doi: 10.1155/2015/678764 (PMC4538422; doi:10.1155/2015/678764)
Supplement: Supplementary file 1 — Training/testing dataset as well as the CASP11 evaluation dataset could be found in the Supplementary Material. The CASP11 evaluation dataset contains all detailed results from SPINE-X, SANN, ACCpro5 and AcconPred. [file 678764.f1.zip › Supplmentary_Files/105_casp11_domain/casp11_domain_AcconPred/T0761-D1.reso]

# AcconPred: three-state solvent accessibility prediction results 
# probabilities are in the order of B (Bury, pACC: 0-10), M (Medium, pACC: 11-40) and E (Exposed, pACC: 41-100), 
# where pACC is the relative solvent accessibility value calculated by DSSP 
# output format: <position> <one letter amino acid> <predicted label> ... <probabilities> ... -> <maximal probability> 

 1 Y E 0.009833 0.060890 0.929277 -> 0.929277 
 2 P E 0.016686 0.123582 0.859732 -> 0.859732 
 3 W M 0.183488 0.531325 0.285188 -> 0.531325 
 4 N E 0.033685 0.234021 0.732294 -> 0.732294 
 5 L M 0.296242 0.428044 0.275714 -> 0.428044 
 6 Y M 0.107330 0.454399 0.438271 -> 0.454399 
 7 T E 0.060427 0.320579 0.618994 -> 0.618994 
 8 G E 0.111033 0.354215 0.534752 -> 0.534752 
 9 Q E 0.017487 0.212944 0.769570 -> 0.769570 
 10 E E 0.064111 0.358241 0.577648 -> 0.577648 
 11 Q E 0.035017 0.394178 0.570805 -> 0.570805 
 12 E E 0.011148 0.180718 0.808134 -> 0.808134 
 13 L M 0.291436 0.548953 0.159611 -> 0.548953 
 14 F B 0.657944 0.279813 0.062242 -> 0.657944 
 15 E M 0.049588 0.534690 0.415721 -> 0.534690 
 16 E E 0.010577 0.151598 0.837825 -> 0.837825 
 17 E M 0.188989 0.614517 0.196494 -> 0.614517 
 18 I B 0.760689 0.192796 0.046514 -> 0.760689 
 19 V B 0.447530 0.335589 0.216882 -> 0.447530 
 20 S M 0.221644 0.406220 0.372137 -> 0.406220 
 21 F B 0.673471 0.265937 0.060592 -> 0.673471 
 22 A B 0.566554 0.255998 0.177448 -> 0.566554 
 23 A E 0.318665 0.286124 0.395211 -> 0.395211 
 24 N E 0.102195 0.362546 0.535259 -> 0.535259 
 25 S B 0.410270 0.389579 0.200151 -> 0.410270 
 26 V B 0.791229 0.183714 0.025057 -> 0.791229 
 27 R M 0.095887 0.603347 0.300766 -> 0.603347 
 28 I B 0.654151 0.295723 0.050126 -> 0.654151 
 29 L B 0.541922 0.363722 0.094356 -> 0.541922 
 30 G E 0.214799 0.374931 0.410269 -> 0.410269 
 31 G E 0.137792 0.351154 0.511054 -> 0.511054 
 32 G E 0.156382 0.367134 0.476484 -> 0.476484 
 33 S E 0.076696 0.286235 0.637069 -> 0.637069 
 34 W B 0.549184 0.406516 0.044300 -> 0.549184 
 35 T E 0.062491 0.410760 0.526749 -> 0.526749 
 36 D E 0.036511 0.313325 0.650164 -> 0.650164 
 37 E E 0.016371 0.168988 0.814641 -> 0.814641 
 38 E E 0.050146 0.422574 0.527280 -> 0.527280 
 39 L B 0.639412 0.308123 0.052466 -> 0.639412 
 40 Y M 0.384313 0.526317 0.089370 -> 0.526317 
 41 P M 0.350206 0.417907 0.231886 -> 0.417907 
 42 L B 0.642921 0.320501 0.036578 -> 0.642921 
 43 I B 0.848376 0.134118 0.017506 -> 0.848376 
 44 K M 0.084951 0.645228 0.269821 -> 0.645228 
 45 F B 0.851091 0.141811 0.007098 -> 0.851091 
 46 R M 0.031710 0.571298 0.396992 -> 0.571298 
 47 Y M 0.368782 0.522432 0.108786 -> 0.522432 
 48 S E 0.075396 0.394381 0.530223 -> 0.530223 
 49 G E 0.121858 0.280673 0.597469 -> 0.597469 
 50 Q E 0.031981 0.309903 0.658117 -> 0.658117 
 51 D E 0.079996 0.416864 0.503140 -> 0.503140 
 52 L B 0.660775 0.305056 0.034169 -> 0.660775 
 53 R E 0.036217 0.419473 0.544310 -> 0.544310 
 54 F B 0.501845 0.413681 0.084475 -> 0.501845 
 55 L B 0.668502 0.283859 0.047639 -> 0.668502 
 56 K E 0.020022 0.307890 0.672088 -> 0.672088 
 57 D E 0.058577 0.311903 0.629520 -> 0.629520 
 58 M B 0.454877 0.432537 0.112586 -> 0.454877 
 59 A E 0.265972 0.347777 0.386251 -> 0.386251 
 60 L B 0.477778 0.403801 0.118421 -> 0.477778 
 61 T E 0.113278 0.405686 0.481036 -> 0.481036 
 62 E E 0.026165 0.334030 0.639805 -> 0.639805 
 63 K E 0.006612 0.110983 0.882404 -> 0.882404 
 64 D E 0.034210 0.182239 0.783551 -> 0.783551 
 65 G E 0.187646 0.298322 0.514032 -> 0.514032 
 66 R E 0.063268 0.460894 0.475838 -> 0.475838 
 67 R M 0.091337 0.513465 0.395198 -> 0.513465 
 68 Y M 0.398451 0.498884 0.102665 -> 0.498884 
 69 L B 0.753600 0.211302 0.035098 -> 0.753600 
 70 V B 0.791842 0.179469 0.028689 -> 0.791842 
 71 N M 0.279045 0.502819 0.218136 -> 0.502819 
 72 M B 0.723553 0.228055 0.048392 -> 0.723553 
 73 A B 0.435941 0.411224 0.152835 -> 0.435941 
 74 L B 0.682405 0.269645 0.047951 -> 0.682405 
 75 D M 0.142036 0.608080 0.249884 -> 0.608080 
 76 P E 0.107236 0.331732 0.561033 -> 0.561033 
 77 N E 0.041390 0.307307 0.651303 -> 0.651303 
 78 G B 0.706029 0.261393 0.032578 -> 0.706029 
 79 L B 0.705989 0.257437 0.036574 -> 0.705989 
 80 C B 0.945345 0.049659 0.004996 -> 0.945345 
 81 Y M 0.361206 0.541478 0.097317 -> 0.541478 
 82 F B 0.866129 0.113547 0.020324 -> 0.866129 
 83 S B 0.691049 0.267364 0.041587 -> 0.691049 
 84 Y M 0.347927 0.513348 0.138725 -> 0.513348 
 85 V M 0.413469 0.462939 0.123592 -> 0.462939 
 86 N E 0.061985 0.450687 0.487328 -> 0.487328 
 87 Q E 0.009541 0.144837 0.845622 -> 0.845622 
 88 D E 0.003437 0.024792 0.971771 -> 0.971771 
