# Supplementary material for: AcconPred: Predicting Solvent Accessibility and Contact Number Simultaneously by a Multitask Learning Framework under the Conditional Neural Fields Model
Source: Biomed Res Int. 2015 Aug 3;2015:678764. doi: 10.1155/2015/678764 (PMC4538422; doi:10.1155/2015/678764)
Supplement: Supplementary file 1 — Training/testing dataset as well as the CASP11 evaluation dataset could be found in the Supplementary Material. The CASP11 evaluation dataset contains all detailed results from SPINE-X, SANN, ACCpro5 and AcconPred. [file 678764.f1.zip › Supplmentary_Files/105_casp11_domain/casp11_domain_AcconPred/T0761-D2.reso]

# AcconPred: three-state solvent accessibility prediction results 
# probabilities are in the order of B (Bury, pACC: 0-10), M (Medium, pACC: 11-40) and E (Exposed, pACC: 41-100), 
# where pACC is the relative solvent accessibility value calculated by DSSP 
# output format: <position> <one letter amino acid> <predicted label> ... <probabilities> ... -> <maximal probability> 

 1 E E 0.004062 0.034026 0.961911 -> 0.961911 
 2 R E 0.007047 0.093504 0.899449 -> 0.899449 
 3 E E 0.005785 0.108800 0.885414 -> 0.885414 
 4 A E 0.044601 0.294970 0.660429 -> 0.660429 
 5 T E 0.031240 0.252017 0.716744 -> 0.716744 
 6 A M 0.124501 0.494264 0.381235 -> 0.494264 
 7 D E 0.003132 0.084862 0.912007 -> 0.912007 
 8 E E 0.006127 0.215805 0.778068 -> 0.778068 
 9 M B 0.548006 0.398836 0.053157 -> 0.548006 
 10 D M 0.098536 0.562029 0.339435 -> 0.562029 
 11 Q E 0.003610 0.112230 0.884159 -> 0.884159 
 12 A B 0.456455 0.400770 0.142775 -> 0.456455 
 13 L B 0.495084 0.446015 0.058901 -> 0.495084 
 14 G E 0.029344 0.224654 0.746002 -> 0.746002 
 15 K E 0.003314 0.152736 0.843950 -> 0.843950 
 16 L B 0.675996 0.303945 0.020059 -> 0.675996 
 17 Q M 0.057453 0.607439 0.335108 -> 0.607439 
 18 E E 0.003707 0.107784 0.888509 -> 0.888509 
 19 D M 0.104951 0.673540 0.221510 -> 0.673540 
 20 W B 0.840963 0.139144 0.019892 -> 0.840963 
 21 E E 0.017947 0.380062 0.601990 -> 0.601990 
 22 K E 0.001924 0.098863 0.899212 -> 0.899212 
 23 F B 0.674758 0.308656 0.016586 -> 0.674758 
 24 L B 0.545932 0.400713 0.053355 -> 0.545932 
 25 S E 0.016736 0.177078 0.806186 -> 0.806186 
 26 D E 0.017397 0.378064 0.604539 -> 0.604539 
 27 P E 0.030203 0.230463 0.739334 -> 0.739334 
 28 L M 0.460985 0.464172 0.074842 -> 0.464172 
 29 P E 0.057507 0.305787 0.636706 -> 0.636706 
 30 K E 0.006437 0.121984 0.871579 -> 0.871579 
 31 T M 0.107563 0.495545 0.396892 -> 0.495545 
 32 D E 0.078024 0.403133 0.518843 -> 0.518843 
 33 N M 0.150646 0.534664 0.314691 -> 0.534664 
 34 A B 0.754346 0.213572 0.032081 -> 0.754346 
 35 F B 0.870107 0.110238 0.019655 -> 0.870107 
 36 Y B 0.564228 0.378370 0.057402 -> 0.564228 
 37 M B 0.844322 0.118527 0.037152 -> 0.844322 
 38 F B 0.949156 0.041886 0.008959 -> 0.949156 
 39 F B 0.871576 0.108137 0.020286 -> 0.871576 
 40 M B 0.716029 0.183211 0.100759 -> 0.716029 
 41 R M 0.463185 0.468363 0.068452 -> 0.468363 
 42 C B 0.879922 0.108772 0.011306 -> 0.879922 
 43 Q M 0.119371 0.538629 0.342000 -> 0.538629 
 44 M M 0.265305 0.446020 0.288676 -> 0.446020 
 45 L B 0.669333 0.294498 0.036170 -> 0.669333 
 46 S M 0.349567 0.527120 0.123313 -> 0.527120 
 47 D E 0.024247 0.180676 0.795077 -> 0.795077 
 48 Q E 0.048023 0.418460 0.533518 -> 0.533518 
 49 M B 0.541643 0.404273 0.054084 -> 0.541643 
 50 R E 0.035709 0.451538 0.512753 -> 0.512753 
 51 K E 0.005688 0.144087 0.850226 -> 0.850226 
 52 E E 0.007940 0.217458 0.774602 -> 0.774602 
 53 Q E 0.036533 0.306482 0.656985 -> 0.656985 
 54 Y M 0.378247 0.484798 0.136955 -> 0.484798 
 55 S M 0.183343 0.512366 0.304291 -> 0.512366 
 56 D E 0.018867 0.175308 0.805825 -> 0.805825 
 57 Y M 0.153719 0.547644 0.298637 -> 0.547644 
 58 I B 0.648241 0.280988 0.070771 -> 0.648241 
 59 G M 0.335533 0.342192 0.322275 -> 0.342192 
 60 D E 0.058751 0.298420 0.642829 -> 0.642829 
 61 N M 0.291180 0.542871 0.165949 -> 0.542871 
 62 L B 0.768916 0.180912 0.050171 -> 0.768916 
 63 Y M 0.282229 0.543162 0.174609 -> 0.543162 
 64 T B 0.446841 0.434746 0.118413 -> 0.446841 
 65 I B 0.935760 0.040804 0.023436 -> 0.935760 
 66 W B 0.848638 0.124288 0.027074 -> 0.848638 
 67 E M 0.352892 0.532955 0.114153 -> 0.532955 
 68 L B 0.614843 0.322018 0.063139 -> 0.614843 
 69 V B 0.777061 0.194075 0.028865 -> 0.777061 
 70 L B 0.628216 0.319690 0.052094 -> 0.628216 
 71 K E 0.020984 0.324243 0.654772 -> 0.654772 
 72 S E 0.161802 0.394739 0.443459 -> 0.443459 
 73 E E 0.026061 0.271481 0.702458 -> 0.702458 
 74 F B 0.712450 0.261738 0.025812 -> 0.712450 
 75 T E 0.062546 0.399544 0.537911 -> 0.537911 
 76 S E 0.076547 0.274391 0.649062 -> 0.649062 
 77 L M 0.436942 0.480285 0.082772 -> 0.480285 
 78 S M 0.190870 0.424641 0.384489 -> 0.424641 
 79 Y M 0.217147 0.472689 0.310164 -> 0.472689 
 80 D E 0.085509 0.351168 0.563323 -> 0.563323 
 81 N E 0.164015 0.407364 0.428621 -> 0.428621 
 82 H M 0.196094 0.556602 0.247303 -> 0.556602 
 83 I B 0.888935 0.098937 0.012128 -> 0.888935 
 84 Y B 0.502737 0.450091 0.047172 -> 0.502737 
 85 A B 0.887435 0.096979 0.015587 -> 0.887435 
 86 M B 0.863307 0.125377 0.011315 -> 0.863307 
 87 Y M 0.438782 0.484002 0.077216 -> 0.484002 
 88 S B 0.651490 0.290782 0.057728 -> 0.651490 
 89 N M 0.104465 0.459425 0.436110 -> 0.459425 
 90 D E 0.029474 0.174692 0.795834 -> 0.795834 
 91 G E 0.110221 0.315882 0.573897 -> 0.573897 
 92 G M 0.301684 0.352684 0.345632 -> 0.352684 
 93 T M 0.350312 0.474094 0.175594 -> 0.474094 
 94 S B 0.638220 0.312284 0.049496 -> 0.638220 
 95 M B 0.783450 0.205685 0.010865 -> 0.783450 
 96 V B 0.867611 0.123290 0.009099 -> 0.867611 
 97 L B 0.886746 0.105175 0.008079 -> 0.886746 
 98 I B 0.872540 0.118331 0.009129 -> 0.872540 
 99 Y B 0.497458 0.404240 0.098302 -> 0.497458 
 100 S B 0.543991 0.382457 0.073551 -> 0.543991 
 101 P M 0.207617 0.434256 0.358127 -> 0.434256 
 102 I B 0.507702 0.344345 0.147953 -> 0.507702 
 103 E M 0.097784 0.480179 0.422037 -> 0.480179 
 104 E E 0.040826 0.255197 0.703977 -> 0.703977 
 105 R E 0.052510 0.429115 0.518376 -> 0.518376 
 106 F B 0.561682 0.346310 0.092008 -> 0.561682 
 107 V M 0.318208 0.411425 0.270367 -> 0.411425 
 108 G E 0.198996 0.273860 0.527144 -> 0.527144 
 109 F B 0.450901 0.434578 0.114520 -> 0.450901 
 110 S E 0.137822 0.403441 0.458736 -> 0.458736 
 111 L M 0.278092 0.511573 0.210335 -> 0.511573 
 112 K E 0.018990 0.198468 0.782542 -> 0.782542 
 113 Y E 0.032199 0.242649 0.725152 -> 0.725152 
