# Supplementary material for: AcconPred: Predicting Solvent Accessibility and Contact Number Simultaneously by a Multitask Learning Framework under the Conditional Neural Fields Model
Source: Biomed Res Int. 2015 Aug 3;2015:678764. doi: 10.1155/2015/678764 (PMC4538422; doi:10.1155/2015/678764)
Supplement: Supplementary file 1 — Training/testing dataset as well as the CASP11 evaluation dataset could be found in the Supplementary Material. The CASP11 evaluation dataset contains all detailed results from SPINE-X, SANN, ACCpro5 and AcconPred. [file 678764.f1.zip › Supplmentary_Files/105_casp11_domain/casp11_domain_AcconPred/T0762-D1.reso]

# AcconPred: three-state solvent accessibility prediction results 
# probabilities are in the order of B (Bury, pACC: 0-10), M (Medium, pACC: 11-40) and E (Exposed, pACC: 41-100), 
# where pACC is the relative solvent accessibility value calculated by DSSP 
# output format: <position> <one letter amino acid> <predicted label> ... <probabilities> ... -> <maximal probability> 

 1 G E 0.016799 0.054002 0.929199 -> 0.929199 
 2 Q E 0.008264 0.099944 0.891792 -> 0.891792 
 3 K E 0.004410 0.083332 0.912258 -> 0.912258 
 4 N E 0.014269 0.113055 0.872676 -> 0.872676 
 5 D E 0.040945 0.287023 0.672032 -> 0.672032 
 6 K E 0.004959 0.090639 0.904402 -> 0.904402 
 7 N E 0.044318 0.469572 0.486111 -> 0.486111 
 8 T M 0.032989 0.485615 0.481396 -> 0.485615 
 9 L B 0.929652 0.068325 0.002022 -> 0.929652 
 10 T M 0.173017 0.726963 0.100020 -> 0.726963 
 11 V B 0.968480 0.030245 0.001275 -> 0.968480 
 12 G B 0.880241 0.115429 0.004330 -> 0.880241 
 13 V B 0.874781 0.120274 0.004944 -> 0.874781 
 14 M B 0.814186 0.166866 0.018948 -> 0.814186 
 15 T B 0.691696 0.261637 0.046668 -> 0.691696 
 16 M B 0.680772 0.250952 0.068276 -> 0.680772 
 17 T B 0.575845 0.243945 0.180211 -> 0.575845 
 18 D M 0.336692 0.403307 0.260001 -> 0.403307 
 19 S B 0.553995 0.271099 0.174906 -> 0.553995 
 20 D B 0.461991 0.348212 0.189797 -> 0.461991 
 21 K M 0.105655 0.462614 0.431730 -> 0.462614 
 22 E E 0.030455 0.245557 0.723989 -> 0.723989 
 23 R M 0.253999 0.560799 0.185202 -> 0.560799 
 24 W B 0.661648 0.298226 0.040126 -> 0.661648 
 25 D E 0.023946 0.275388 0.700666 -> 0.700666 
 26 K E 0.006514 0.252592 0.740894 -> 0.740894 
 27 I B 0.924312 0.065352 0.010336 -> 0.924312 
 28 E M 0.119541 0.690951 0.189508 -> 0.690951 
 29 E E 0.006158 0.119342 0.874500 -> 0.874500 
 30 L M 0.326524 0.638614 0.034862 -> 0.638614 
 31 L B 0.946067 0.049229 0.004703 -> 0.946067 
 32 K E 0.000976 0.082933 0.916092 -> 0.916092 
 33 K E 0.000156 0.024978 0.974866 -> 0.974866 
 34 E M 0.016544 0.535438 0.448018 -> 0.535438 
 35 N E 0.007585 0.115068 0.877348 -> 0.877348 
 36 I B 0.812281 0.179283 0.008436 -> 0.812281 
 37 K E 0.008286 0.184392 0.807322 -> 0.807322 
 38 L B 0.636004 0.347202 0.016793 -> 0.636004 
 39 K E 0.010426 0.343089 0.646485 -> 0.646485 
 40 F M 0.221694 0.726464 0.051842 -> 0.726464 
 41 K M 0.031260 0.621435 0.347305 -> 0.621435 
 42 E E 0.011678 0.265535 0.722788 -> 0.722788 
 43 F B 0.691270 0.300128 0.008603 -> 0.691270 
 44 T E 0.015016 0.232915 0.752069 -> 0.752069 
 45 D E 0.058239 0.434566 0.507195 -> 0.507195 
 46 Y M 0.120739 0.581056 0.298205 -> 0.581056 
 47 S E 0.139001 0.407849 0.453150 -> 0.453150 
 48 Q E 0.075867 0.451456 0.472677 -> 0.472677 
 49 P B 0.642305 0.284491 0.073204 -> 0.642305 
 50 N B 0.481254 0.439738 0.079008 -> 0.481254 
 51 K E 0.008892 0.260128 0.730980 -> 0.730980 
 52 A B 0.806023 0.162648 0.031329 -> 0.806023 
 53 L B 0.819701 0.167980 0.012319 -> 0.819701 
 54 K E 0.009163 0.260301 0.730537 -> 0.730537 
 55 N E 0.019452 0.218243 0.762305 -> 0.762305 
 56 G E 0.049440 0.427562 0.522997 -> 0.522997 
 57 E E 0.024956 0.275489 0.699555 -> 0.699555 
 58 I B 0.908155 0.085228 0.006616 -> 0.908155 
 59 D M 0.420945 0.540324 0.038731 -> 0.540324 
 60 I B 0.906228 0.086161 0.007611 -> 0.906228 
 61 N B 0.690182 0.267594 0.042224 -> 0.690182 
 62 S B 0.785244 0.193498 0.021258 -> 0.785244 
 63 F B 0.782267 0.187415 0.030318 -> 0.782267 
 64 Q B 0.727442 0.220759 0.051799 -> 0.727442 
 65 H B 0.682536 0.293038 0.024427 -> 0.682536 
 66 Y M 0.464406 0.481115 0.054480 -> 0.481115 
 67 N B 0.582307 0.298107 0.119586 -> 0.582307 
 68 F B 0.883452 0.100086 0.016463 -> 0.883452 
 69 L B 0.989811 0.007062 0.003127 -> 0.989811 
 70 N M 0.310381 0.589040 0.100578 -> 0.589040 
 71 N M 0.269846 0.513532 0.216622 -> 0.513532 
 72 W B 0.500126 0.477622 0.022252 -> 0.500126 
 73 N B 0.563477 0.394019 0.042504 -> 0.563477 
 74 K E 0.005634 0.065064 0.929302 -> 0.929302 
 75 E E 0.001984 0.060478 0.937539 -> 0.937539 
 76 N M 0.153785 0.689756 0.156459 -> 0.689756 
 77 K E 0.005030 0.077434 0.917535 -> 0.917535 
 78 G M 0.347933 0.500045 0.152022 -> 0.500045 
 79 D E 0.033328 0.336439 0.630233 -> 0.630233 
 80 L B 0.739519 0.246899 0.013582 -> 0.739519 
 81 V M 0.382272 0.574212 0.043515 -> 0.574212 
 82 T B 0.822300 0.155119 0.022581 -> 0.822300 
 83 V B 0.849546 0.142853 0.007601 -> 0.849546 
 84 A B 0.735759 0.232527 0.031713 -> 0.735759 
 85 E M 0.136272 0.550724 0.313005 -> 0.550724 
 86 T B 0.618674 0.315249 0.066077 -> 0.618674 
 87 Y M 0.289437 0.540560 0.170002 -> 0.540560 
 88 I M 0.294922 0.471416 0.233663 -> 0.471416 
 89 S B 0.452233 0.361483 0.186284 -> 0.452233 
 90 P E 0.140552 0.388177 0.471271 -> 0.471271 
 91 I M 0.342040 0.436987 0.220973 -> 0.436987 
 92 N B 0.526048 0.372898 0.101053 -> 0.526048 
 93 L B 0.710752 0.250899 0.038349 -> 0.710752 
 94 F B 0.677958 0.263064 0.058978 -> 0.677958 
 95 S B 0.691818 0.221852 0.086329 -> 0.691818 
 96 G E 0.231874 0.372905 0.395220 -> 0.395220 
 97 T E 0.134918 0.408068 0.457014 -> 0.457014 
 98 E E 0.049929 0.267513 0.682557 -> 0.682557 
 99 N E 0.073844 0.266209 0.659946 -> 0.659946 
 100 G E 0.057910 0.228415 0.713676 -> 0.713676 
 101 K E 0.009743 0.103970 0.886287 -> 0.886287 
 102 A E 0.083429 0.425300 0.491271 -> 0.491271 
 103 K E 0.006079 0.118897 0.875024 -> 0.875024 
 104 Y M 0.468049 0.511765 0.020186 -> 0.511765 
 105 S E 0.059075 0.377027 0.563898 -> 0.563898 
 106 S M 0.139680 0.653714 0.206605 -> 0.653714 
 107 A B 0.591257 0.366660 0.042083 -> 0.591257 
 108 K E 0.002179 0.043118 0.954703 -> 0.954703 
 109 E E 0.037774 0.258990 0.703236 -> 0.703236 
 110 I B 0.717746 0.264495 0.017759 -> 0.717746 
 111 P M 0.062014 0.507110 0.430876 -> 0.507110 
 112 N E 0.002787 0.042828 0.954386 -> 0.954386 
 113 G E 0.018143 0.247548 0.734308 -> 0.734308 
 114 G M 0.277214 0.661775 0.061011 -> 0.661775 
 115 Q E 0.017179 0.421040 0.561781 -> 0.561781 
 116 I B 0.878368 0.116820 0.004813 -> 0.878368 
 117 A B 0.864846 0.122208 0.012946 -> 0.864846 
 118 I B 0.863802 0.124403 0.011795 -> 0.863802 
 119 P B 0.628249 0.317426 0.054325 -> 0.628249 
 120 N E 0.063172 0.417333 0.519495 -> 0.519495 
 121 D M 0.179338 0.504977 0.315685 -> 0.504977 
 122 A B 0.366849 0.366617 0.266534 -> 0.366849 
 123 T B 0.632834 0.268978 0.098188 -> 0.632834 
 124 N B 0.529545 0.305865 0.164589 -> 0.529545 
 125 E M 0.387779 0.489491 0.122730 -> 0.489491 
 126 S B 0.734861 0.210240 0.054899 -> 0.734861 
 127 R B 0.471695 0.436252 0.092053 -> 0.471695 
 128 A B 0.985293 0.011139 0.003568 -> 0.985293 
 129 L B 0.772248 0.213376 0.014376 -> 0.772248 
 130 Y M 0.147640 0.768566 0.083794 -> 0.768566 
 131 V B 0.866470 0.115490 0.018040 -> 0.866470 
 132 L B 0.963206 0.028407 0.008388 -> 0.963206 
 133 Q E 0.019168 0.357292 0.623540 -> 0.623540 
 134 D E 0.002282 0.100131 0.897587 -> 0.897587 
 135 A M 0.262792 0.599638 0.137570 -> 0.599638 
 136 G E 0.090361 0.299966 0.609673 -> 0.609673 
 137 L B 0.798128 0.189565 0.012306 -> 0.798128 
 138 I B 0.681857 0.300588 0.017554 -> 0.681857 
 139 K E 0.012363 0.298516 0.689121 -> 0.689121 
 140 L B 0.565878 0.413057 0.021065 -> 0.565878 
 141 N E 0.022134 0.467401 0.510465 -> 0.510465 
 142 V E 0.069410 0.293066 0.637524 -> 0.637524 
 143 S E 0.014048 0.200862 0.785090 -> 0.785090 
 144 G E 0.030922 0.188548 0.780531 -> 0.780531 
 145 D E 0.020556 0.193760 0.785684 -> 0.785684 
 146 E E 0.016246 0.168423 0.815330 -> 0.815330 
 147 L M 0.143239 0.445152 0.411609 -> 0.445152 
 148 A B 0.503762 0.401986 0.094252 -> 0.503762 
 149 T M 0.149143 0.445254 0.405603 -> 0.445254 
 150 V M 0.267609 0.590766 0.141625 -> 0.590766 
 151 K E 0.003492 0.069557 0.926951 -> 0.926951 
 152 N M 0.111514 0.679008 0.209478 -> 0.679008 
 153 I B 0.845889 0.142256 0.011855 -> 0.845889 
 154 K E 0.005032 0.142727 0.852241 -> 0.852241 
 155 S E 0.011038 0.076064 0.912898 -> 0.912898 
 156 N M 0.393035 0.560401 0.046564 -> 0.560401 
 157 P M 0.143336 0.474154 0.382510 -> 0.474154 
 158 K E 0.016104 0.163726 0.820170 -> 0.820170 
 159 N E 0.023960 0.301200 0.674840 -> 0.674840 
 160 L B 0.767511 0.223909 0.008580 -> 0.767511 
 161 D E 0.008134 0.168654 0.823211 -> 0.823211 
 162 I M 0.258834 0.672478 0.068688 -> 0.672478 
 163 K E 0.006047 0.316305 0.677649 -> 0.677649 
 164 E E 0.007891 0.138559 0.853550 -> 0.853550 
 165 V B 0.539667 0.441186 0.019147 -> 0.539667 
 166 D E 0.037880 0.319064 0.643056 -> 0.643056 
 167 A M 0.216743 0.492635 0.290621 -> 0.492635 
 168 S M 0.328923 0.341536 0.329541 -> 0.341536 
 169 Q M 0.196409 0.470468 0.333123 -> 0.470468 
 170 T B 0.576945 0.316645 0.106410 -> 0.576945 
 171 A B 0.592508 0.276463 0.131028 -> 0.592508 
 172 R M 0.122803 0.446350 0.430847 -> 0.446350 
 173 N E 0.229824 0.337967 0.432209 -> 0.432209 
 174 L M 0.427420 0.524373 0.048206 -> 0.524373 
 175 A E 0.032832 0.218505 0.748663 -> 0.748663 
 176 S E 0.038433 0.372147 0.589421 -> 0.589421 
 177 V B 0.845909 0.142265 0.011827 -> 0.845909 
 178 D M 0.212765 0.630777 0.156458 -> 0.630777 
 179 A B 0.961848 0.036377 0.001775 -> 0.961848 
 180 A B 0.971292 0.028015 0.000693 -> 0.971292 
 181 V B 0.975586 0.022801 0.001613 -> 0.975586 
 182 V B 0.954874 0.042319 0.002808 -> 0.954874 
 183 N B 0.634800 0.319421 0.045779 -> 0.634800 
 184 N B 0.501615 0.415145 0.083241 -> 0.501615 
 185 S M 0.276808 0.404103 0.319090 -> 0.404103 
 186 Y B 0.474661 0.472301 0.053037 -> 0.474661 
 187 A B 0.837019 0.138898 0.024082 -> 0.837019 
 188 V M 0.408242 0.471861 0.119897 -> 0.471861 
 189 P E 0.093767 0.396201 0.510032 -> 0.510032 
 190 A B 0.523062 0.362399 0.114539 -> 0.523062 
 191 K E 0.002665 0.088221 0.909114 -> 0.909114 
 192 I M 0.362888 0.573669 0.063443 -> 0.573669 
 193 D E 0.008647 0.143432 0.847921 -> 0.847921 
 194 F M 0.170784 0.484798 0.344418 -> 0.484798 
 195 K E 0.007394 0.118886 0.873720 -> 0.873720 
 196 T E 0.123416 0.434600 0.441983 -> 0.441983 
 197 S M 0.370985 0.465961 0.163054 -> 0.465961 
 198 L B 0.599879 0.333623 0.066498 -> 0.599879 
 199 Y M 0.453773 0.458167 0.088060 -> 0.458167 
 200 K E 0.078649 0.409509 0.511842 -> 0.511842 
 201 E M 0.331213 0.494037 0.174751 -> 0.494037 
 202 K E 0.012634 0.205446 0.781920 -> 0.781920 
 203 V M 0.147045 0.492562 0.360393 -> 0.492562 
 204 N E 0.027471 0.190876 0.781652 -> 0.781652 
 205 E E 0.012572 0.179460 0.807968 -> 0.807968 
 206 G E 0.045518 0.219215 0.735267 -> 0.735267 
 207 S E 0.074911 0.338082 0.587007 -> 0.587007 
 208 K E 0.049536 0.430237 0.520227 -> 0.520227 
 209 Q M 0.286153 0.520293 0.193554 -> 0.520293 
 210 W B 0.584382 0.391399 0.024218 -> 0.584382 
 211 I B 0.949572 0.049570 0.000857 -> 0.949572 
 212 N B 0.894406 0.099368 0.006226 -> 0.894406 
 213 I B 0.987733 0.011821 0.000446 -> 0.987733 
 214 I B 0.953693 0.044672 0.001635 -> 0.953693 
 215 A B 0.957754 0.040029 0.002218 -> 0.957754 
 216 A B 0.972084 0.027036 0.000880 -> 0.972084 
 217 Q M 0.342766 0.584172 0.073062 -> 0.584172 
 218 K E 0.022914 0.323652 0.653433 -> 0.653433 
 219 N E 0.021812 0.263626 0.714562 -> 0.714562 
 220 W M 0.282176 0.658067 0.059756 -> 0.658067 
 221 K E 0.004001 0.107388 0.888611 -> 0.888611 
 222 K E 0.002957 0.035629 0.961413 -> 0.961413 
 223 S M 0.153353 0.594892 0.251755 -> 0.594892 
 224 K E 0.004492 0.058455 0.937054 -> 0.937054 
 225 K E 0.009691 0.184852 0.805457 -> 0.805457 
 226 A M 0.135728 0.695935 0.168337 -> 0.695935 
 227 A E 0.005966 0.078802 0.915232 -> 0.915232 
 228 A B 0.566594 0.360938 0.072467 -> 0.566594 
 229 I B 0.762848 0.224778 0.012374 -> 0.762848 
 230 K E 0.016485 0.308860 0.674656 -> 0.674656 
 231 K M 0.035007 0.633802 0.331191 -> 0.633802 
 232 L B 0.986932 0.011046 0.002022 -> 0.986932 
 233 I M 0.449497 0.539659 0.010844 -> 0.539659 
 234 K E 0.005527 0.103445 0.891028 -> 0.891028 
 235 A B 0.746226 0.227006 0.026768 -> 0.746226 
 236 Y B 0.622826 0.361593 0.015581 -> 0.622826 
 237 H M 0.074186 0.528678 0.397137 -> 0.528678 
 238 T M 0.030987 0.818837 0.150176 -> 0.818837 
 239 D E 0.003018 0.065702 0.931280 -> 0.931280 
 240 A E 0.043229 0.285465 0.671306 -> 0.671306 
 241 V B 0.930371 0.059753 0.009876 -> 0.930371 
 242 K M 0.034624 0.644286 0.321090 -> 0.644286 
 243 K E 0.004371 0.088067 0.907562 -> 0.907562 
 244 V M 0.302802 0.676563 0.020635 -> 0.676563 
 245 I B 0.893522 0.096271 0.010207 -> 0.893522 
 246 K E 0.005310 0.262886 0.731804 -> 0.731804 
 247 K E 0.002256 0.062161 0.935583 -> 0.935583 
 248 T M 0.078865 0.536345 0.384790 -> 0.536345 
 249 A B 0.541545 0.396137 0.062317 -> 0.541545 
 250 K E 0.001596 0.056771 0.941633 -> 0.941633 
 251 G E 0.026118 0.109471 0.864411 -> 0.864411 
 252 V M 0.248777 0.602644 0.148579 -> 0.602644 
 253 D E 0.029038 0.150204 0.820757 -> 0.820757 
 254 E M 0.115150 0.486406 0.398444 -> 0.486406 
 255 P E 0.191975 0.329675 0.478350 -> 0.478350 
 256 V E 0.179328 0.292677 0.527995 -> 0.527995 
 257 W M 0.174564 0.548550 0.276885 -> 0.548550 
