# Supplementary material for: AcconPred: Predicting Solvent Accessibility and Contact Number Simultaneously by a Multitask Learning Framework under the Conditional Neural Fields Model
Source: Biomed Res Int. 2015 Aug 3;2015:678764. doi: 10.1155/2015/678764 (PMC4538422; doi:10.1155/2015/678764)
Supplement: Supplementary file 1 — Training/testing dataset as well as the CASP11 evaluation dataset could be found in the Supplementary Material. The CASP11 evaluation dataset contains all detailed results from SPINE-X, SANN, ACCpro5 and AcconPred. [file 678764.f1.zip › Supplmentary_Files/105_casp11_domain/casp11_domain_AcconPred/T0763-D1.reso]

# AcconPred: three-state solvent accessibility prediction results 
# probabilities are in the order of B (Bury, pACC: 0-10), M (Medium, pACC: 11-40) and E (Exposed, pACC: 41-100), 
# where pACC is the relative solvent accessibility value calculated by DSSP 
# output format: <position> <one letter amino acid> <predicted label> ... <probabilities> ... -> <maximal probability> 

 1 R E 0.002513 0.023982 0.973505 -> 0.973505 
 2 M M 0.051723 0.511685 0.436592 -> 0.511685 
 3 E E 0.004897 0.107553 0.887549 -> 0.887549 
 4 I M 0.245985 0.518039 0.235976 -> 0.518039 
 5 S E 0.060457 0.417448 0.522094 -> 0.522094 
 6 S E 0.039485 0.278189 0.682326 -> 0.682326 
 7 L M 0.266250 0.559194 0.174556 -> 0.559194 
 8 S E 0.055577 0.401757 0.542666 -> 0.542666 
 9 S E 0.069383 0.432886 0.497731 -> 0.497731 
 10 I B 0.624081 0.350693 0.025226 -> 0.624081 
 11 D M 0.091095 0.546857 0.362047 -> 0.546857 
 12 V B 0.599821 0.344850 0.055330 -> 0.599821 
 13 F B 0.562944 0.393224 0.043832 -> 0.562944 
 14 K E 0.024262 0.395564 0.580175 -> 0.580175 
 15 F B 0.704076 0.263327 0.032597 -> 0.704076 
 16 N M 0.075718 0.511109 0.413173 -> 0.511109 
 17 S M 0.159393 0.434770 0.405838 -> 0.434770 
 18 F B 0.537256 0.365031 0.097713 -> 0.537256 
 19 S M 0.198322 0.474799 0.326879 -> 0.474799 
 20 K E 0.013949 0.203209 0.782842 -> 0.782842 
 21 F B 0.615990 0.343612 0.040399 -> 0.615990 
 22 S M 0.115606 0.500818 0.383576 -> 0.500818 
 23 N E 0.013683 0.172036 0.814281 -> 0.814281 
 24 D E 0.020849 0.326427 0.652724 -> 0.652724 
 25 K E 0.013425 0.341577 0.644999 -> 0.644999 
 26 I B 0.731412 0.248090 0.020498 -> 0.731412 
 27 G B 0.791146 0.184295 0.024558 -> 0.791146 
 28 V B 0.797074 0.182815 0.020111 -> 0.797074 
 29 I B 0.698601 0.267796 0.033603 -> 0.698601 
 30 Y M 0.354735 0.560405 0.084860 -> 0.560405 
 31 D M 0.183438 0.607274 0.209289 -> 0.607274 
 32 E E 0.034746 0.331247 0.634007 -> 0.634007 
 33 E E 0.008897 0.091223 0.899881 -> 0.899881 
 34 K E 0.027306 0.385754 0.586940 -> 0.586940 
 35 L B 0.622316 0.320699 0.056985 -> 0.622316 
 36 S M 0.185031 0.502429 0.312540 -> 0.502429 
 37 K E 0.026548 0.472822 0.500630 -> 0.500630 
 38 F B 0.835165 0.154781 0.010054 -> 0.835165 
 39 K M 0.116977 0.669701 0.213321 -> 0.669701 
 40 V B 0.876707 0.108723 0.014570 -> 0.876707 
 41 I B 0.716196 0.264588 0.019216 -> 0.716196 
 42 M B 0.804113 0.179768 0.016119 -> 0.804113 
 43 N M 0.229828 0.563393 0.206779 -> 0.563393 
 44 S M 0.227188 0.426353 0.346459 -> 0.426353 
 45 L B 0.460048 0.449380 0.090572 -> 0.460048 
 46 D E 0.045689 0.351969 0.602342 -> 0.602342 
 47 T E 0.095760 0.411229 0.493011 -> 0.493011 
 48 S E 0.051950 0.299290 0.648761 -> 0.648761 
 49 E E 0.006140 0.076678 0.917183 -> 0.917183 
 50 G E 0.187689 0.311550 0.500760 -> 0.500760 
 51 I M 0.447043 0.511695 0.041263 -> 0.511695 
 52 K E 0.004334 0.148970 0.846697 -> 0.846697 
 53 K E 0.003402 0.119103 0.877495 -> 0.877495 
 54 I M 0.472689 0.509860 0.017451 -> 0.509860 
 55 E E 0.004966 0.148065 0.846969 -> 0.846969 
 56 V B 0.585867 0.389574 0.024559 -> 0.585867 
 57 P M 0.140137 0.549888 0.309975 -> 0.549888 
 58 K E 0.001581 0.044102 0.954317 -> 0.954317 
 59 D E 0.004341 0.102491 0.893168 -> 0.893168 
 60 A M 0.353649 0.503578 0.142774 -> 0.503578 
 61 N E 0.032156 0.299327 0.668517 -> 0.668517 
 62 I B 0.464189 0.462695 0.073116 -> 0.464189 
 63 E E 0.012048 0.248373 0.739579 -> 0.739579 
 64 S M 0.121887 0.449781 0.428332 -> 0.449781 
 65 F B 0.675471 0.307919 0.016610 -> 0.675471 
 66 K E 0.010596 0.279349 0.710055 -> 0.710055 
 67 Y M 0.377056 0.534545 0.088399 -> 0.534545 
 68 S M 0.302285 0.514668 0.183046 -> 0.514668 
 69 Y B 0.568775 0.390719 0.040507 -> 0.568775 
 70 H M 0.093964 0.574185 0.331852 -> 0.574185 
 71 I B 0.767279 0.212221 0.020500 -> 0.767279 
 72 Q M 0.073718 0.596378 0.329905 -> 0.596378 
 73 P E 0.120351 0.325272 0.554377 -> 0.554377 
 74 N E 0.011034 0.163568 0.825398 -> 0.825398 
 75 L B 0.603958 0.374846 0.021196 -> 0.603958 
 76 K E 0.003743 0.127171 0.869087 -> 0.869087 
 77 Y M 0.110180 0.676386 0.213434 -> 0.676386 
 78 V M 0.404422 0.540501 0.055078 -> 0.540501 
 79 E E 0.012065 0.283909 0.704026 -> 0.704026 
 80 D E 0.024297 0.209959 0.765744 -> 0.765744 
 81 N E 0.016481 0.201166 0.782352 -> 0.782352 
 82 N E 0.035242 0.288421 0.676336 -> 0.676336 
 83 V B 0.508542 0.389949 0.101509 -> 0.508542 
 84 Y M 0.139613 0.622661 0.237726 -> 0.622661 
 85 D E 0.046590 0.434035 0.519376 -> 0.519376 
 86 G B 0.730716 0.226505 0.042779 -> 0.730716 
 87 Y M 0.392379 0.538327 0.069295 -> 0.538327 
 88 F B 0.935498 0.058599 0.005903 -> 0.935498 
 89 L B 0.939461 0.054025 0.006514 -> 0.939461 
 90 L B 0.961576 0.036243 0.002180 -> 0.961576 
 91 Y B 0.528724 0.430639 0.040637 -> 0.528724 
 92 I B 0.939103 0.054944 0.005953 -> 0.939103 
 93 L B 0.816525 0.174052 0.009423 -> 0.816525 
 94 V B 0.820646 0.156940 0.022414 -> 0.820646 
 95 G M 0.367791 0.463090 0.169118 -> 0.463090 
 96 D E 0.076514 0.420642 0.502845 -> 0.502845 
 97 S E 0.156235 0.396295 0.447470 -> 0.447470 
 98 E E 0.023815 0.160652 0.815533 -> 0.815533 
 99 G E 0.086584 0.284415 0.629001 -> 0.629001 
 100 K E 0.031004 0.442185 0.526810 -> 0.526810 
 101 S B 0.540685 0.369090 0.090225 -> 0.540685 
 102 Y M 0.362645 0.564703 0.072651 -> 0.564703 
 103 I B 0.887900 0.100465 0.011635 -> 0.887900 
 104 I M 0.446864 0.452782 0.100354 -> 0.452782 
 105 F B 0.850143 0.126837 0.023020 -> 0.850143 
 106 S M 0.197882 0.483487 0.318631 -> 0.483487 
 107 G E 0.165504 0.298957 0.535538 -> 0.535538 
 108 T M 0.149374 0.478234 0.372392 -> 0.478234 
 109 E E 0.076616 0.414633 0.508750 -> 0.508750 
 110 L B 0.763967 0.217589 0.018444 -> 0.763967 
 111 S B 0.627680 0.312408 0.059911 -> 0.627680 
 112 Y M 0.411706 0.501248 0.087046 -> 0.501248 
 113 V B 0.680831 0.277962 0.041207 -> 0.680831 
 114 L B 0.793559 0.178810 0.027631 -> 0.793559 
 115 D M 0.253322 0.585977 0.160702 -> 0.585977 
 116 K E 0.010843 0.194456 0.794701 -> 0.794701 
 117 N E 0.018053 0.224950 0.756997 -> 0.756997 
 118 N M 0.156699 0.524621 0.318680 -> 0.524621 
 119 T M 0.181568 0.468397 0.350035 -> 0.468397 
 120 N E 0.032671 0.311944 0.655385 -> 0.655385 
 121 I B 0.595684 0.361599 0.042717 -> 0.595684 
 122 L B 0.774302 0.196112 0.029586 -> 0.774302 
 123 K E 0.020910 0.373951 0.605139 -> 0.605139 
 124 E E 0.048021 0.383174 0.568805 -> 0.568805 
 125 I B 0.598197 0.362200 0.039603 -> 0.598197 
 126 F B 0.528380 0.331203 0.140416 -> 0.528380 
 127 L E 0.083262 0.352912 0.563825 -> 0.563825 
 128 N E 0.006036 0.128345 0.865619 -> 0.865619 
 129 V M 0.168370 0.588325 0.243306 -> 0.588325 
 130 K E 0.006973 0.062591 0.930436 -> 0.930436 
