# Supplementary material for: AcconPred: Predicting Solvent Accessibility and Contact Number Simultaneously by a Multitask Learning Framework under the Conditional Neural Fields Model
Source: Biomed Res Int. 2015 Aug 3;2015:678764. doi: 10.1155/2015/678764 (PMC4538422; doi:10.1155/2015/678764)
Supplement: Supplementary file 1 — Training/testing dataset as well as the CASP11 evaluation dataset could be found in the Supplementary Material. The CASP11 evaluation dataset contains all detailed results from SPINE-X, SANN, ACCpro5 and AcconPred. [file 678764.f1.zip › Supplmentary_Files/105_casp11_domain/casp11_domain_AcconPred/T0764-D1.reso]

# AcconPred: three-state solvent accessibility prediction results 
# probabilities are in the order of B (Bury, pACC: 0-10), M (Medium, pACC: 11-40) and E (Exposed, pACC: 41-100), 
# where pACC is the relative solvent accessibility value calculated by DSSP 
# output format: <position> <one letter amino acid> <predicted label> ... <probabilities> ... -> <maximal probability> 

 1 E E 0.004360 0.034696 0.960944 -> 0.960944 
 2 R E 0.016553 0.196604 0.786843 -> 0.786843 
 3 V E 0.035596 0.316624 0.647780 -> 0.647780 
 4 L M 0.316875 0.493454 0.189671 -> 0.493454 
 5 M M 0.079450 0.533068 0.387482 -> 0.533068 
 6 V B 0.681782 0.287827 0.030391 -> 0.681782 
 7 D M 0.108668 0.525206 0.366126 -> 0.525206 
 8 E E 0.089989 0.342634 0.567377 -> 0.567377 
 9 Q M 0.254118 0.497505 0.248377 -> 0.497505 
 10 G M 0.279596 0.382235 0.338170 -> 0.382235 
 11 S B 0.441286 0.432787 0.125928 -> 0.441286 
 12 F B 0.839499 0.151197 0.009304 -> 0.839499 
 13 A B 0.534909 0.395182 0.069909 -> 0.534909 
 14 V B 0.774834 0.200449 0.024717 -> 0.774834 
 15 G B 0.353233 0.328616 0.318151 -> 0.353233 
 16 G M 0.258277 0.377007 0.364716 -> 0.377007 
 17 T E 0.041181 0.382181 0.576638 -> 0.576638 
 18 V E 0.071400 0.325283 0.603317 -> 0.603317 
 19 L M 0.226526 0.661406 0.112067 -> 0.661406 
 20 V E 0.030179 0.144594 0.825227 -> 0.825227 
 21 D M 0.085289 0.477985 0.436725 -> 0.477985 
 22 S E 0.088109 0.249987 0.661903 -> 0.661903 
 23 L E 0.014929 0.111931 0.873140 -> 0.873140 
 24 G E 0.052629 0.199840 0.747531 -> 0.747531 
 25 H M 0.066352 0.474537 0.459111 -> 0.474537 
 26 T E 0.143269 0.417301 0.439429 -> 0.439429 
 27 F B 0.622835 0.361150 0.016016 -> 0.622835 
 28 H M 0.119214 0.575027 0.305759 -> 0.575027 
 29 G B 0.497289 0.329866 0.172845 -> 0.497289 
 30 D M 0.137939 0.532675 0.329386 -> 0.532675 
 31 H B 0.490422 0.464517 0.045062 -> 0.490422 
 32 A B 0.929900 0.066233 0.003867 -> 0.929900 
 33 Y B 0.622272 0.357501 0.020227 -> 0.622272 
 34 V B 0.949787 0.046568 0.003646 -> 0.949787 
 35 F B 0.614715 0.336068 0.049218 -> 0.614715 
 36 Y M 0.339524 0.590798 0.069679 -> 0.590798 
 37 Q M 0.368176 0.498980 0.132844 -> 0.498980 
 38 K M 0.060428 0.503014 0.436558 -> 0.503014 
 39 P B 0.395113 0.377438 0.227449 -> 0.395113 
 40 V E 0.072187 0.231373 0.696440 -> 0.696440 
 41 G E 0.020268 0.112098 0.867634 -> 0.867634 
 42 A E 0.124038 0.350271 0.525692 -> 0.525692 
 43 R E 0.033591 0.360602 0.605808 -> 0.605808 
 44 K E 0.004242 0.112092 0.883667 -> 0.883667 
 45 Y M 0.297193 0.666522 0.036285 -> 0.666522 
 46 P B 0.679339 0.311090 0.009571 -> 0.679339 
 47 L B 0.981847 0.017898 0.000254 -> 0.981847 
 48 V B 0.993767 0.005739 0.000495 -> 0.993767 
 49 F B 0.993993 0.005428 0.000579 -> 0.993993 
 50 A B 0.985063 0.014469 0.000467 -> 0.985063 
 51 H B 0.839559 0.156651 0.003790 -> 0.839559 
 52 G B 0.840525 0.144839 0.014636 -> 0.840525 
 53 V B 0.808204 0.164604 0.027192 -> 0.808204 
 54 G B 0.854587 0.122200 0.023213 -> 0.854587 
 55 Q B 0.692814 0.227421 0.079765 -> 0.692814 
 56 F B 0.516480 0.352173 0.131348 -> 0.516480 
 57 S B 0.723718 0.206221 0.070061 -> 0.723718 
 58 K M 0.128778 0.539335 0.331887 -> 0.539335 
 59 T B 0.720824 0.234005 0.045171 -> 0.720824 
 60 W B 0.805177 0.169733 0.025090 -> 0.805177 
 61 E M 0.138520 0.602748 0.258732 -> 0.602748 
 62 T E 0.112728 0.376256 0.511017 -> 0.511017 
 63 T M 0.361476 0.505182 0.133341 -> 0.505182 
 64 P B 0.383661 0.301162 0.315177 -> 0.383661 
 65 D E 0.143848 0.419413 0.436739 -> 0.436739 
 66 G E 0.110546 0.317734 0.571720 -> 0.571720 
 67 R M 0.126415 0.554078 0.319507 -> 0.554078 
 68 E E 0.067389 0.285756 0.646855 -> 0.646855 
 69 G B 0.412617 0.391436 0.195946 -> 0.412617 
 70 F B 0.861214 0.112857 0.025929 -> 0.861214 
 71 Q B 0.625346 0.288893 0.085760 -> 0.625346 
 72 N M 0.135673 0.646777 0.217550 -> 0.646777 
 73 I B 0.493448 0.465073 0.041480 -> 0.493448 
 74 F B 0.983293 0.013034 0.003673 -> 0.983293 
 75 L B 0.708998 0.222986 0.068015 -> 0.708998 
 76 R E 0.006663 0.176794 0.816543 -> 0.816543 
 77 R E 0.014909 0.482129 0.502961 -> 0.502961 
 78 R E 0.007350 0.190106 0.802544 -> 0.802544 
 79 F B 0.806583 0.186755 0.006662 -> 0.806583 
 80 C M 0.452694 0.514822 0.032484 -> 0.514822 
 81 V B 0.958472 0.040880 0.000648 -> 0.958472 
 82 Y B 0.842526 0.153489 0.003985 -> 0.842526 
 83 L B 0.975539 0.023884 0.000577 -> 0.975539 
 84 V B 0.946138 0.052583 0.001279 -> 0.946138 
 85 D B 0.763088 0.226862 0.010050 -> 0.763088 
 86 Q B 0.733292 0.218239 0.048470 -> 0.733292 
 87 P B 0.629006 0.300666 0.070328 -> 0.629006 
 88 R M 0.234042 0.395464 0.370494 -> 0.395464 
 89 R B 0.419436 0.415115 0.165450 -> 0.419436 
 90 G B 0.615367 0.309483 0.075149 -> 0.615367 
 91 N E 0.114862 0.347581 0.537557 -> 0.537557 
 92 A B 0.495739 0.421348 0.082913 -> 0.495739 
 93 G E 0.199772 0.306716 0.493512 -> 0.493512 
 94 R E 0.053800 0.406023 0.540177 -> 0.540177 
 95 G E 0.171062 0.389283 0.439654 -> 0.439654 
 96 T E 0.057157 0.325814 0.617029 -> 0.617029 
 97 E E 0.038191 0.202386 0.759423 -> 0.759423 
 98 S E 0.173458 0.393052 0.433490 -> 0.433490 
 99 V M 0.255570 0.415562 0.328867 -> 0.415562 
 100 T E 0.187105 0.394670 0.418225 -> 0.418225 
 101 I M 0.279753 0.446865 0.273382 -> 0.446865 
 102 S M 0.272943 0.388484 0.338573 -> 0.388484 
 103 P E 0.068508 0.258535 0.672956 -> 0.672956 
 104 A E 0.169545 0.384905 0.445550 -> 0.445550 
 105 F B 0.455954 0.403922 0.140124 -> 0.455954 
 106 D M 0.358191 0.406952 0.234857 -> 0.406952 
 107 E M 0.136061 0.528604 0.335335 -> 0.528604 
 108 E M 0.233950 0.556004 0.210046 -> 0.556004 
 109 V B 0.882000 0.097741 0.020259 -> 0.882000 
 110 W B 0.727989 0.208255 0.063756 -> 0.727989 
 111 F M 0.393992 0.470847 0.135160 -> 0.470847 
 112 N B 0.471180 0.338348 0.190471 -> 0.471180 
 113 R M 0.397194 0.459495 0.143311 -> 0.459495 
 114 F E 0.243631 0.340843 0.415525 -> 0.415525 
 115 R M 0.162635 0.511694 0.325671 -> 0.511694 
 116 V B 0.775129 0.180947 0.043924 -> 0.775129 
 117 G B 0.458906 0.300223 0.240871 -> 0.458906 
 118 I M 0.402279 0.434319 0.163402 -> 0.434319 
 119 W B 0.567820 0.358417 0.073763 -> 0.567820 
 120 P B 0.553152 0.290896 0.155952 -> 0.553152 
 121 D B 0.369753 0.296873 0.333375 -> 0.369753 
 122 Y B 0.495425 0.429833 0.074742 -> 0.495425 
 123 F B 0.715406 0.247249 0.037345 -> 0.715406 
 124 E B 0.431285 0.362600 0.206115 -> 0.431285 
 125 G B 0.695192 0.211312 0.093496 -> 0.695192 
 126 V B 0.664226 0.270841 0.064933 -> 0.664226 
 127 Q B 0.619708 0.277623 0.102669 -> 0.619708 
 128 F M 0.343714 0.498286 0.158000 -> 0.498286 
 129 K E 0.042648 0.324882 0.632470 -> 0.632470 
 130 R E 0.088517 0.438676 0.472807 -> 0.472807 
 131 D M 0.151760 0.476432 0.371808 -> 0.476432 
 132 K E 0.037695 0.366926 0.595380 -> 0.595380 
 133 E E 0.055250 0.266260 0.678490 -> 0.678490 
 134 T M 0.319355 0.499894 0.180751 -> 0.499894 
 135 L B 0.782662 0.171316 0.046022 -> 0.782662 
 136 D M 0.264246 0.452295 0.283459 -> 0.452295 
 137 Q E 0.182062 0.390421 0.427518 -> 0.427518 
 138 Y B 0.486321 0.458425 0.055254 -> 0.486321 
 139 F B 0.702713 0.266745 0.030542 -> 0.702713 
 140 R E 0.047593 0.396226 0.556181 -> 0.556181 
 141 Q M 0.266586 0.391962 0.341452 -> 0.391962 
 142 M M 0.436961 0.437814 0.125225 -> 0.437814 
 143 T B 0.632202 0.269660 0.098138 -> 0.632202 
 144 P B 0.384588 0.328468 0.286944 -> 0.384588 
 145 T B 0.353564 0.323364 0.323072 -> 0.353564 
 146 I B 0.579494 0.306207 0.114299 -> 0.579494 
 147 G B 0.458123 0.283238 0.258639 -> 0.458123 
 148 T B 0.400603 0.377729 0.221668 -> 0.400603 
 149 T E 0.240678 0.372020 0.387302 -> 0.387302 
 150 D M 0.235785 0.466953 0.297263 -> 0.466953 
 151 F M 0.277876 0.483602 0.238522 -> 0.483602 
 152 E E 0.058447 0.290344 0.651208 -> 0.651208 
 153 V B 0.452767 0.397223 0.150010 -> 0.452767 
 154 Y B 0.681651 0.286316 0.032033 -> 0.681651 
 155 S B 0.610034 0.323533 0.066433 -> 0.610034 
 156 D E 0.051233 0.397773 0.550994 -> 0.550994 
 157 A B 0.713409 0.233905 0.052686 -> 0.713409 
 158 Y B 0.913344 0.077840 0.008816 -> 0.913344 
 159 A B 0.576424 0.328165 0.095412 -> 0.576424 
 160 A M 0.184055 0.468064 0.347881 -> 0.468064 
 161 L B 0.586930 0.364466 0.048604 -> 0.586930 
 162 F B 0.509704 0.437161 0.053135 -> 0.509704 
 163 D E 0.029639 0.233082 0.737279 -> 0.737279 
 164 K E 0.018361 0.278755 0.702884 -> 0.702884 
 165 I M 0.385163 0.434928 0.179909 -> 0.434928 
 166 G M 0.313942 0.442413 0.243645 -> 0.442413 
 167 P M 0.127776 0.487993 0.384231 -> 0.487993 
 168 G B 0.705611 0.240955 0.053433 -> 0.705611 
 169 V B 0.744525 0.236997 0.018479 -> 0.744525 
 170 F B 0.820554 0.157477 0.021969 -> 0.820554 
 171 I B 0.935539 0.057231 0.007230 -> 0.935539 
 172 T B 0.614097 0.322146 0.063756 -> 0.614097 
 173 H B 0.707471 0.236179 0.056350 -> 0.707471 
 174 S B 0.567371 0.316723 0.115906 -> 0.567371 
 175 Q B 0.559297 0.323601 0.117102 -> 0.559297 
 176 G B 0.680748 0.224788 0.094464 -> 0.680748 
 177 G B 0.815611 0.157160 0.027229 -> 0.815611 
 178 P B 0.405008 0.381501 0.213490 -> 0.405008 
 179 V B 0.620033 0.297573 0.082394 -> 0.620033 
 180 G B 0.904763 0.077978 0.017259 -> 0.904763 
 181 W B 0.736093 0.227322 0.036585 -> 0.736093 
 182 N M 0.287726 0.520864 0.191410 -> 0.520864 
 183 T B 0.602385 0.292534 0.105082 -> 0.602385 
 184 L B 0.618627 0.315505 0.065868 -> 0.618627 
 185 L B 0.436611 0.401250 0.162139 -> 0.436611 
 186 K E 0.023663 0.324363 0.651973 -> 0.651973 
 187 T M 0.291555 0.520254 0.188191 -> 0.520254 
 188 R E 0.032496 0.200796 0.766708 -> 0.766708 
 189 N E 0.062574 0.465500 0.471925 -> 0.471925 
 190 I B 0.862841 0.134502 0.002657 -> 0.862841 
 191 K M 0.061814 0.571015 0.367170 -> 0.571015 
 192 A B 0.883518 0.110194 0.006287 -> 0.883518 
 193 I B 0.934097 0.061472 0.004432 -> 0.934097 
 194 A B 0.881450 0.109176 0.009374 -> 0.881450 
 195 S B 0.887476 0.098027 0.014497 -> 0.887476 
 196 Y B 0.617627 0.346806 0.035568 -> 0.617627 
 197 E B 0.587440 0.330662 0.081898 -> 0.587440 
 198 P M 0.342123 0.402290 0.255588 -> 0.402290 
 199 G M 0.308986 0.358751 0.332263 -> 0.358751 
 200 G M 0.330447 0.367700 0.301853 -> 0.367700 
 201 A B 0.430573 0.308080 0.261347 -> 0.430573 
 202 V M 0.230585 0.447222 0.322193 -> 0.447222 
 203 P B 0.400828 0.325960 0.273213 -> 0.400828 
 204 F M 0.377117 0.469381 0.153501 -> 0.469381 
 205 P E 0.155457 0.317949 0.526593 -> 0.526593 
 206 E E 0.040324 0.251188 0.708488 -> 0.708488 
 207 G E 0.125816 0.272338 0.601846 -> 0.601846 
 208 Q E 0.101539 0.405599 0.492862 -> 0.492862 
 209 L B 0.498257 0.384152 0.117591 -> 0.498257 
 210 P M 0.178710 0.455627 0.365663 -> 0.455627 
 211 E E 0.020623 0.169393 0.809984 -> 0.809984 
 212 E M 0.106593 0.459038 0.434369 -> 0.459038 
 213 A B 0.625060 0.289974 0.084966 -> 0.625060 
 214 K E 0.039540 0.342722 0.617738 -> 0.617738 
 215 F M 0.310120 0.405376 0.284504 -> 0.405376 
 216 I M 0.269575 0.473564 0.256861 -> 0.473564 
 217 T E 0.085677 0.291017 0.623306 -> 0.623306 
 218 L M 0.245024 0.454598 0.300377 -> 0.454598 
 219 S E 0.309949 0.315134 0.374917 -> 0.374917 
 220 K E 0.019332 0.227214 0.753454 -> 0.753454 
 221 K E 0.029322 0.269997 0.700681 -> 0.700681 
 222 M M 0.424008 0.456561 0.119431 -> 0.456561 
 223 E E 0.024867 0.198756 0.776377 -> 0.776377 
 224 G E 0.129859 0.280136 0.590005 -> 0.590005 
 225 I M 0.255997 0.568433 0.175570 -> 0.568433 
 226 E E 0.029338 0.202046 0.768616 -> 0.768616 
 227 V M 0.415140 0.474517 0.110343 -> 0.474517 
 228 P M 0.230154 0.393556 0.376290 -> 0.393556 
 229 M M 0.330998 0.446314 0.222688 -> 0.446314 
 230 S E 0.075395 0.251814 0.672791 -> 0.672791 
 231 V M 0.281521 0.532414 0.186065 -> 0.532414 
 232 F B 0.749796 0.217923 0.032281 -> 0.749796 
 233 M E 0.086495 0.398695 0.514809 -> 0.514809 
 234 E E 0.014546 0.131899 0.853556 -> 0.853556 
 235 Y M 0.410630 0.504155 0.085214 -> 0.504155 
 236 T M 0.396045 0.472826 0.131129 -> 0.472826 
 237 K E 0.004194 0.134861 0.860945 -> 0.860945 
 238 V B 0.832786 0.152341 0.014873 -> 0.832786 
 239 P B 0.465597 0.427538 0.106864 -> 0.465597 
 240 I B 0.828428 0.153509 0.018063 -> 0.828428 
 241 V B 0.588429 0.325946 0.085625 -> 0.588429 
 242 I B 0.859203 0.124354 0.016443 -> 0.859203 
 243 Y B 0.650397 0.311025 0.038578 -> 0.650397 
 244 Y B 0.432832 0.426403 0.140765 -> 0.432832 
 245 G B 0.715617 0.197366 0.087017 -> 0.715617 
 246 D E 0.115022 0.398786 0.486192 -> 0.486192 
 247 N E 0.109149 0.339117 0.551734 -> 0.551734 
 248 L M 0.338074 0.527553 0.134373 -> 0.527553 
 249 P E 0.074525 0.317756 0.607719 -> 0.607719 
 250 E E 0.017383 0.155586 0.827032 -> 0.827032 
 251 T M 0.167337 0.421928 0.410735 -> 0.421928 
 252 D E 0.086195 0.352634 0.561170 -> 0.561170 
 253 E E 0.033158 0.223661 0.743181 -> 0.743181 
 254 R M 0.096513 0.482704 0.420783 -> 0.482704 
 255 P E 0.293574 0.298509 0.407918 -> 0.407918 
 256 E E 0.121895 0.340754 0.537351 -> 0.537351 
 257 L M 0.285574 0.453063 0.261362 -> 0.453063 
 258 Y M 0.178872 0.420114 0.401015 -> 0.420114 
 259 E M 0.280912 0.404940 0.314148 -> 0.404940 
 260 W B 0.645761 0.277422 0.076817 -> 0.645761 
 261 T M 0.379597 0.446788 0.173615 -> 0.446788 
 262 R M 0.120208 0.463610 0.416183 -> 0.463610 
 263 R M 0.320724 0.564478 0.114797 -> 0.564478 
 264 L B 0.694809 0.256358 0.048832 -> 0.694809 
 265 R E 0.077597 0.433049 0.489355 -> 0.489355 
 266 L B 0.669301 0.279723 0.050976 -> 0.669301 
 267 M B 0.911360 0.078883 0.009757 -> 0.911360 
 268 K M 0.123510 0.658492 0.217997 -> 0.658492 
 269 I B 0.640400 0.297947 0.061654 -> 0.640400 
 270 W B 0.977526 0.019759 0.002715 -> 0.977526 
 271 A B 0.953733 0.041189 0.005078 -> 0.953733 
 272 K E 0.010297 0.430472 0.559231 -> 0.559231 
 273 M B 0.498935 0.470906 0.030159 -> 0.498935 
 274 L B 0.973550 0.022133 0.004318 -> 0.973550 
 275 N M 0.049242 0.532201 0.418557 -> 0.532201 
 276 D E 0.018125 0.110015 0.871860 -> 0.871860 
 277 Q M 0.107023 0.582284 0.310694 -> 0.582284 
 278 G E 0.143065 0.283981 0.572954 -> 0.572954 
 279 G B 0.418468 0.338083 0.243449 -> 0.418468 
 280 D E 0.009674 0.207309 0.783017 -> 0.783017 
 281 V B 0.774403 0.215780 0.009817 -> 0.774403 
 282 T E 0.033527 0.357265 0.609208 -> 0.609208 
 283 V M 0.265994 0.618480 0.115526 -> 0.618480 
 284 I M 0.399255 0.543704 0.057041 -> 0.543704 
 285 H M 0.089821 0.676656 0.233524 -> 0.676656 
 286 L B 0.957698 0.039223 0.003079 -> 0.957698 
 287 P M 0.131970 0.545374 0.322656 -> 0.545374 
 288 E E 0.007408 0.076898 0.915694 -> 0.915694 
 289 V M 0.228163 0.628575 0.143262 -> 0.628575 
 290 G E 0.062729 0.279241 0.658031 -> 0.658031 
 291 L B 0.718700 0.273272 0.008028 -> 0.718700 
 292 H E 0.024840 0.360193 0.614967 -> 0.614967 
 293 G E 0.144964 0.380642 0.474394 -> 0.474394 
 294 N B 0.677831 0.292281 0.029888 -> 0.677831 
 295 T B 0.862319 0.117452 0.020229 -> 0.862319 
 296 H B 0.686634 0.283642 0.029724 -> 0.686634 
 297 F B 0.874152 0.112964 0.012884 -> 0.874152 
 298 P B 0.940872 0.051213 0.007916 -> 0.940872 
 299 M B 0.848264 0.137199 0.014537 -> 0.848264 
 300 S B 0.685186 0.262182 0.052632 -> 0.685186 
 301 D B 0.840524 0.133779 0.025697 -> 0.840524 
 302 L M 0.180249 0.512181 0.307570 -> 0.512181 
 303 N M 0.346933 0.508166 0.144901 -> 0.508166 
 304 N M 0.257229 0.633695 0.109076 -> 0.633695 
 305 I M 0.059649 0.488161 0.452190 -> 0.488161 
 306 E E 0.019951 0.393715 0.586334 -> 0.586334 
 307 V B 0.976360 0.016332 0.007308 -> 0.976360 
 308 A B 0.807121 0.185884 0.006995 -> 0.807121 
 309 D E 0.011688 0.246035 0.742276 -> 0.742276 
 310 L M 0.319865 0.649192 0.030943 -> 0.649192 
 311 L B 0.995038 0.004119 0.000843 -> 0.995038 
 312 S M 0.301120 0.665601 0.033279 -> 0.665601 
 313 E E 0.003193 0.181066 0.815741 -> 0.815741 
 314 W B 0.606249 0.377456 0.016295 -> 0.606249 
 315 L B 0.834741 0.159426 0.005833 -> 0.834741 
 316 H E 0.006376 0.188320 0.805304 -> 0.805304 
 317 T E 0.006620 0.070679 0.922701 -> 0.922701 
 318 K E 0.011184 0.317102 0.671714 -> 0.671714 
 319 A E 0.096522 0.336138 0.567339 -> 0.567339 
 320 L E 0.058684 0.309516 0.631800 -> 0.631800 
 321 D E 0.005011 0.039228 0.955761 -> 0.955761 
