# Supplementary material for: AcconPred: Predicting Solvent Accessibility and Contact Number Simultaneously by a Multitask Learning Framework under the Conditional Neural Fields Model
Source: Biomed Res Int. 2015 Aug 3;2015:678764. doi: 10.1155/2015/678764 (PMC4538422; doi:10.1155/2015/678764)
Supplement: Supplementary file 1 — Training/testing dataset as well as the CASP11 evaluation dataset could be found in the Supplementary Material. The CASP11 evaluation dataset contains all detailed results from SPINE-X, SANN, ACCpro5 and AcconPred. [file 678764.f1.zip › Supplmentary_Files/105_casp11_domain/casp11_domain_AcconPred/T0765-D1.reso]

# AcconPred: three-state solvent accessibility prediction results 
# probabilities are in the order of B (Bury, pACC: 0-10), M (Medium, pACC: 11-40) and E (Exposed, pACC: 41-100), 
# where pACC is the relative solvent accessibility value calculated by DSSP 
# output format: <position> <one letter amino acid> <predicted label> ... <probabilities> ... -> <maximal probability> 

 1 Q E 0.006357 0.045623 0.948020 -> 0.948020 
 2 Q E 0.009610 0.154151 0.836239 -> 0.836239 
 3 Q E 0.005203 0.102453 0.892344 -> 0.892344 
 4 E E 0.013320 0.215606 0.771074 -> 0.771074 
 5 A M 0.322557 0.453399 0.224043 -> 0.453399 
 6 T M 0.138649 0.485613 0.375738 -> 0.485613 
 7 L B 0.743215 0.218125 0.038660 -> 0.743215 
 8 A M 0.311102 0.557448 0.131450 -> 0.557448 
 9 I B 0.686941 0.285450 0.027609 -> 0.686941 
 10 R M 0.097039 0.659469 0.243492 -> 0.659469 
 11 P B 0.420630 0.313291 0.266079 -> 0.420630 
 12 V E 0.125466 0.412729 0.461805 -> 0.461805 
 13 G E 0.083501 0.299222 0.617277 -> 0.617277 
 14 Q E 0.024887 0.244510 0.730602 -> 0.730602 
 15 G E 0.073359 0.233295 0.693346 -> 0.693346 
 16 I M 0.152388 0.492145 0.355467 -> 0.492145 
 17 G E 0.074999 0.263989 0.661012 -> 0.661012 
 18 M M 0.423584 0.472722 0.103694 -> 0.472722 
 19 P E 0.137078 0.384450 0.478472 -> 0.478472 
 20 D M 0.165916 0.455507 0.378577 -> 0.455507 
 21 G B 0.633330 0.267012 0.099659 -> 0.633330 
 22 F B 0.836542 0.137701 0.025757 -> 0.836542 
 23 S B 0.664079 0.290235 0.045687 -> 0.664079 
 24 V B 0.926580 0.059489 0.013931 -> 0.926580 
 25 W B 0.688039 0.262210 0.049752 -> 0.688039 
 26 H B 0.595962 0.340048 0.063990 -> 0.595962 
 27 H M 0.216804 0.612417 0.170779 -> 0.612417 
 28 L B 0.788971 0.186814 0.024215 -> 0.788971 
 29 D E 0.042281 0.374529 0.583190 -> 0.583190 
 30 A E 0.076342 0.280184 0.643474 -> 0.643474 
 31 N E 0.030893 0.253426 0.715681 -> 0.715681 
 32 G E 0.124134 0.331387 0.544479 -> 0.544479 
 33 I B 0.716588 0.265161 0.018251 -> 0.716588 
 34 R E 0.030654 0.424262 0.545083 -> 0.545083 
 35 F B 0.651087 0.338013 0.010900 -> 0.651087 
 36 K E 0.017862 0.336115 0.646023 -> 0.646023 
 37 S M 0.275956 0.506566 0.217478 -> 0.506566 
 38 I M 0.434903 0.502585 0.062512 -> 0.502585 
 39 T M 0.145175 0.530180 0.324644 -> 0.530180 
 40 P E 0.120753 0.429922 0.449325 -> 0.449325 
 41 Q E 0.010340 0.286952 0.702708 -> 0.702708 
 42 K E 0.004556 0.068121 0.927324 -> 0.927324 
 43 D E 0.037817 0.432915 0.529268 -> 0.529268 
 44 G B 0.795326 0.179323 0.025351 -> 0.795326 
 45 L B 0.799450 0.190092 0.010458 -> 0.799450 
 46 L B 0.748256 0.240847 0.010897 -> 0.748256 
 47 I B 0.964783 0.033549 0.001668 -> 0.964783 
 48 K M 0.093828 0.750819 0.155353 -> 0.750819 
 49 F B 0.898875 0.099104 0.002021 -> 0.898875 
 50 D E 0.024288 0.409280 0.566432 -> 0.566432 
 51 S M 0.082140 0.596694 0.321166 -> 0.596694 
 52 T E 0.004809 0.074346 0.920845 -> 0.920845 
 53 A E 0.063864 0.207788 0.728348 -> 0.728348 
 54 Q M 0.246484 0.472933 0.280583 -> 0.472933 
 55 G B 0.460035 0.354513 0.185452 -> 0.460035 
 56 A E 0.043701 0.236741 0.719558 -> 0.719558 
 57 A M 0.331550 0.466320 0.202130 -> 0.466320 
 58 A B 0.869524 0.103374 0.027101 -> 0.869524 
 59 K E 0.011665 0.358705 0.629630 -> 0.629630 
 60 E E 0.006284 0.249824 0.743891 -> 0.743891 
 61 V B 0.741195 0.247022 0.011783 -> 0.741195 
 62 L B 0.879123 0.107605 0.013272 -> 0.879123 
 63 G M 0.071308 0.526805 0.401887 -> 0.526805 
 64 R E 0.009970 0.208499 0.781532 -> 0.781532 
 65 A B 0.453779 0.339956 0.206265 -> 0.453779 
 66 L B 0.712086 0.256223 0.031691 -> 0.712086 
 67 P E 0.179955 0.379504 0.440541 -> 0.440541 
 68 H E 0.032408 0.322951 0.644641 -> 0.644641 
 69 G B 0.432404 0.304508 0.263088 -> 0.432404 
 70 Y B 0.506843 0.442608 0.050549 -> 0.506843 
 71 I B 0.647248 0.265302 0.087451 -> 0.647248 
 72 I B 0.774815 0.172674 0.052512 -> 0.774815 
 73 A B 0.634410 0.261792 0.103798 -> 0.634410 
 74 L M 0.293564 0.521097 0.185338 -> 0.521097 
 75 L M 0.128456 0.525929 0.345615 -> 0.525929 
 76 E E 0.002707 0.039768 0.957525 -> 0.957525 
