# Supplementary material for: AcconPred: Predicting Solvent Accessibility and Contact Number Simultaneously by a Multitask Learning Framework under the Conditional Neural Fields Model
Source: Biomed Res Int. 2015 Aug 3;2015:678764. doi: 10.1155/2015/678764 (PMC4538422; doi:10.1155/2015/678764)
Supplement: Supplementary file 1 — Training/testing dataset as well as the CASP11 evaluation dataset could be found in the Supplementary Material. The CASP11 evaluation dataset contains all detailed results from SPINE-X, SANN, ACCpro5 and AcconPred. [file 678764.f1.zip › Supplmentary_Files/105_casp11_domain/casp11_domain_AcconPred/T0766-D1.reso]

# AcconPred: three-state solvent accessibility prediction results 
# probabilities are in the order of B (Bury, pACC: 0-10), M (Medium, pACC: 11-40) and E (Exposed, pACC: 41-100), 
# where pACC is the relative solvent accessibility value calculated by DSSP 
# output format: <position> <one letter amino acid> <predicted label> ... <probabilities> ... -> <maximal probability> 

 1 N E 0.006845 0.044880 0.948274 -> 0.948274 
 2 V M 0.093384 0.516299 0.390317 -> 0.516299 
 3 P E 0.055108 0.340408 0.604484 -> 0.604484 
 4 E E 0.008208 0.107125 0.884667 -> 0.884667 
 5 G M 0.072931 0.507636 0.419432 -> 0.507636 
 6 V B 0.843758 0.120226 0.036017 -> 0.843758 
 7 I M 0.169772 0.651701 0.178527 -> 0.651701 
 8 G E 0.062894 0.375699 0.561407 -> 0.561407 
 9 A B 0.712216 0.274621 0.013162 -> 0.712216 
 10 F B 0.746545 0.222112 0.031343 -> 0.746545 
 11 K E 0.007696 0.121494 0.870810 -> 0.870810 
 12 E E 0.005584 0.112573 0.881844 -> 0.881844 
 13 G M 0.142112 0.475208 0.382680 -> 0.475208 
 14 N M 0.053694 0.554089 0.392217 -> 0.554089 
 15 S M 0.373207 0.497772 0.129021 -> 0.497772 
 16 Q E 0.004836 0.090205 0.904958 -> 0.904958 
 17 E M 0.028766 0.608081 0.363152 -> 0.608081 
 18 L B 0.947201 0.048807 0.003992 -> 0.947201 
 19 N M 0.293248 0.577697 0.129055 -> 0.577697 
 20 K E 0.001841 0.047943 0.950216 -> 0.950216 
 21 Y M 0.152433 0.684747 0.162820 -> 0.684747 
 22 L B 0.736993 0.242020 0.020987 -> 0.736993 
 23 G E 0.031704 0.271034 0.697262 -> 0.697262 
 24 D E 0.021904 0.352599 0.625497 -> 0.625497 
 25 K E 0.009035 0.373813 0.617152 -> 0.617152 
 26 V B 0.933808 0.063269 0.002923 -> 0.933808 
 27 D M 0.258321 0.630705 0.110974 -> 0.630705 
 28 L B 0.936712 0.060308 0.002980 -> 0.936712 
 29 I M 0.363621 0.586554 0.049825 -> 0.586554 
 30 I B 0.865919 0.127728 0.006353 -> 0.865919 
 31 Q M 0.103403 0.605415 0.291183 -> 0.605415 
 32 N E 0.069960 0.383831 0.546209 -> 0.546209 
 33 K E 0.003439 0.102750 0.893812 -> 0.893812 
 34 S E 0.042131 0.249143 0.708726 -> 0.708726 
 35 T E 0.021593 0.210938 0.767469 -> 0.767469 
 36 H E 0.036601 0.280713 0.682686 -> 0.682686 
 37 A B 0.567888 0.387876 0.044236 -> 0.567888 
 38 D E 0.031577 0.419676 0.548747 -> 0.548747 
 39 K E 0.012935 0.268256 0.718808 -> 0.718808 
 40 R E 0.014498 0.173307 0.812195 -> 0.812195 
 41 T M 0.177775 0.624355 0.197869 -> 0.624355 
 42 A B 0.960836 0.029152 0.010012 -> 0.960836 
 43 E M 0.280487 0.579182 0.140331 -> 0.579182 
 44 G E 0.130295 0.375505 0.494200 -> 0.494200 
 45 T B 0.645987 0.336301 0.017713 -> 0.645987 
 46 M B 0.962393 0.028928 0.008679 -> 0.962393 
 47 A M 0.142146 0.578070 0.279783 -> 0.578070 
 48 A E 0.113337 0.438492 0.448171 -> 0.448171 
 49 F B 0.737330 0.238559 0.024110 -> 0.737330 
 50 F B 0.833669 0.147695 0.018635 -> 0.833669 
 51 S E 0.008400 0.197741 0.793859 -> 0.793859 
 52 N E 0.003310 0.069170 0.927519 -> 0.927519 
 53 H M 0.262148 0.649468 0.088384 -> 0.649468 
 54 K E 0.002770 0.088056 0.909174 -> 0.909174 
 55 V B 0.507445 0.409830 0.082725 -> 0.507445 
 56 G M 0.163514 0.516110 0.320376 -> 0.516110 
 57 S E 0.041260 0.347875 0.610864 -> 0.610864 
 58 F B 0.744720 0.240762 0.014518 -> 0.744720 
 59 N E 0.031963 0.444995 0.523042 -> 0.523042 
 60 V B 0.455298 0.454784 0.089918 -> 0.455298 
 61 N M 0.068211 0.524285 0.407504 -> 0.524285 
 62 H M 0.428635 0.497916 0.073449 -> 0.497916 
 63 Q E 0.032920 0.449200 0.517879 -> 0.517879 
 64 G M 0.325459 0.467400 0.207142 -> 0.467400 
 65 K E 0.009461 0.165211 0.825328 -> 0.825328 
 66 R E 0.048246 0.392503 0.559251 -> 0.559251 
 67 D E 0.022918 0.229631 0.747451 -> 0.747451 
 68 E E 0.012491 0.144824 0.842686 -> 0.842686 
 69 S M 0.406416 0.418879 0.174705 -> 0.418879 
 70 G M 0.364948 0.503851 0.131201 -> 0.503851 
 71 F B 0.803348 0.183574 0.013078 -> 0.803348 
 72 V B 0.901618 0.092005 0.006377 -> 0.901618 
 73 I B 0.756317 0.236081 0.007603 -> 0.756317 
 74 G B 0.926013 0.068815 0.005172 -> 0.926013 
 75 I M 0.304972 0.545325 0.149703 -> 0.545325 
 76 L B 0.829019 0.162698 0.008282 -> 0.829019 
 77 M M 0.139045 0.585633 0.275321 -> 0.585633 
 78 T B 0.628057 0.319802 0.052141 -> 0.628057 
 79 A E 0.145512 0.357490 0.496998 -> 0.496998 
 80 N E 0.007272 0.100621 0.892107 -> 0.892107 
 81 G E 0.074454 0.353507 0.572039 -> 0.572039 
 82 N M 0.099601 0.524688 0.375711 -> 0.524688 
 83 F B 0.669321 0.304614 0.026066 -> 0.669321 
 84 R M 0.239391 0.661326 0.099284 -> 0.661326 
 85 V B 0.919374 0.074775 0.005851 -> 0.919374 
 86 N B 0.515208 0.436766 0.048026 -> 0.515208 
 87 C B 0.972182 0.026458 0.001360 -> 0.972182 
 88 F M 0.369878 0.576741 0.053381 -> 0.576741 
 89 F B 0.792008 0.196441 0.011551 -> 0.792008 
 90 R M 0.118504 0.718712 0.162785 -> 0.718712 
 91 K M 0.042461 0.516512 0.441027 -> 0.516512 
 92 V M 0.087987 0.506965 0.405047 -> 0.506965 
 93 Q E 0.009706 0.110214 0.880079 -> 0.880079 
 94 N E 0.006520 0.139950 0.853530 -> 0.853530 
 95 K E 0.002405 0.199907 0.797687 -> 0.797687 
 96 Y M 0.327105 0.507861 0.165034 -> 0.507861 
 97 V M 0.381564 0.544387 0.074049 -> 0.544387 
 98 I B 0.874432 0.119433 0.006135 -> 0.874432 
 99 H M 0.221051 0.641378 0.137571 -> 0.641378 
 100 Q M 0.347589 0.498586 0.153825 -> 0.498586 
 101 I B 0.855105 0.130924 0.013970 -> 0.855105 
 102 R M 0.057713 0.690510 0.251778 -> 0.690510 
 103 I B 0.858887 0.128514 0.012599 -> 0.858887 
 104 D M 0.091709 0.695112 0.213179 -> 0.695112 
 105 K E 0.016101 0.205885 0.778014 -> 0.778014 
 106 T E 0.017090 0.334909 0.648001 -> 0.648001 
 107 D E 0.005330 0.117022 0.877648 -> 0.877648 
 108 E E 0.000797 0.008633 0.990570 -> 0.990570 
