# Supplementary material for: AcconPred: Predicting Solvent Accessibility and Contact Number Simultaneously by a Multitask Learning Framework under the Conditional Neural Fields Model
Source: Biomed Res Int. 2015 Aug 3;2015:678764. doi: 10.1155/2015/678764 (PMC4538422; doi:10.1155/2015/678764)
Supplement: Supplementary file 1 — Training/testing dataset as well as the CASP11 evaluation dataset could be found in the Supplementary Material. The CASP11 evaluation dataset contains all detailed results from SPINE-X, SANN, ACCpro5 and AcconPred. [file 678764.f1.zip › Supplmentary_Files/105_casp11_domain/casp11_domain_AcconPred/T0767-D1.reso]

# AcconPred: three-state solvent accessibility prediction results 
# probabilities are in the order of B (Bury, pACC: 0-10), M (Medium, pACC: 11-40) and E (Exposed, pACC: 41-100), 
# where pACC is the relative solvent accessibility value calculated by DSSP 
# output format: <position> <one letter amino acid> <predicted label> ... <probabilities> ... -> <maximal probability> 

 1 P E 0.004160 0.033331 0.962508 -> 0.962508 
 2 A E 0.015152 0.119996 0.864853 -> 0.864853 
 3 E E 0.015017 0.172508 0.812475 -> 0.812475 
 4 K E 0.009206 0.160547 0.830247 -> 0.830247 
 5 D E 0.029187 0.336905 0.633908 -> 0.633908 
 6 A B 0.549682 0.346146 0.104172 -> 0.549682 
 7 I M 0.217871 0.554915 0.227214 -> 0.554915 
 8 E E 0.012236 0.279996 0.707768 -> 0.707768 
 9 F B 0.500111 0.443033 0.056855 -> 0.500111 
 10 S B 0.721461 0.235841 0.042698 -> 0.721461 
 11 K E 0.004451 0.169418 0.826131 -> 0.826131 
 12 K E 0.001751 0.080956 0.917293 -> 0.917293 
 13 H M 0.287427 0.603226 0.109348 -> 0.603226 
 14 K M 0.072645 0.501514 0.425841 -> 0.501514 
 15 D E 0.004753 0.101677 0.893569 -> 0.893569 
 16 K E 0.007968 0.189702 0.802330 -> 0.802330 
 17 I B 0.505217 0.442438 0.052345 -> 0.505217 
 18 A E 0.036382 0.373325 0.590293 -> 0.590293 
 19 K E 0.002080 0.058421 0.939499 -> 0.939499 
 20 R M 0.072422 0.588247 0.339332 -> 0.588247 
 21 G B 0.639159 0.249529 0.111312 -> 0.639159 
 22 E E 0.034263 0.335663 0.630074 -> 0.630074 
 23 Q E 0.023795 0.273823 0.702382 -> 0.702382 
 24 F B 0.643971 0.308826 0.047204 -> 0.643971 
 25 F B 0.638758 0.310808 0.050433 -> 0.638758 
 26 M E 0.062083 0.407238 0.530680 -> 0.530680 
 27 D E 0.056292 0.296668 0.647040 -> 0.647040 
 28 N M 0.093301 0.471808 0.434891 -> 0.471808 
 29 F B 0.778369 0.192667 0.028964 -> 0.778369 
 30 G M 0.374462 0.421697 0.203840 -> 0.421697 
 31 L B 0.825581 0.161396 0.013023 -> 0.825581 
 32 K E 0.013650 0.316763 0.669587 -> 0.669587 
 33 V B 0.817121 0.178177 0.004702 -> 0.817121 
 34 K E 0.012091 0.311501 0.676408 -> 0.676408 
 35 A B 0.610286 0.332234 0.057479 -> 0.610286 
 36 T M 0.114974 0.580405 0.304621 -> 0.580405 
 37 N E 0.106511 0.413226 0.480263 -> 0.480263 
 38 V M 0.357240 0.469807 0.172953 -> 0.469807 
 39 V M 0.357296 0.436121 0.206583 -> 0.436121 
 40 G M 0.279949 0.388258 0.331793 -> 0.388258 
 41 S E 0.092425 0.377249 0.530326 -> 0.530326 
 42 G E 0.033336 0.186512 0.780152 -> 0.780152 
 43 D E 0.053914 0.366302 0.579784 -> 0.579784 
 44 G B 0.528133 0.345871 0.125995 -> 0.528133 
 45 V B 0.734345 0.240849 0.024806 -> 0.734345 
 46 E M 0.342640 0.552589 0.104770 -> 0.552589 
 47 V B 0.911582 0.083443 0.004975 -> 0.911582 
 48 F B 0.664133 0.303783 0.032084 -> 0.664133 
 49 V B 0.948526 0.049380 0.002094 -> 0.948526 
 50 H M 0.258081 0.599230 0.142690 -> 0.599230 
 51 C B 0.805767 0.182983 0.011250 -> 0.805767 
 52 D E 0.029373 0.369028 0.601600 -> 0.601600 
 53 D E 0.027013 0.202558 0.770429 -> 0.770429 
 54 H M 0.108615 0.522976 0.368409 -> 0.522976 
 55 D M 0.211723 0.465352 0.322924 -> 0.465352 
 56 I B 0.837059 0.143724 0.019217 -> 0.837059 
 57 V M 0.303705 0.511601 0.184693 -> 0.511601 
 58 F B 0.786206 0.193700 0.020094 -> 0.786206 
 59 N M 0.141425 0.540010 0.318566 -> 0.540010 
 60 A B 0.569359 0.320876 0.109765 -> 0.569359 
 61 S E 0.100503 0.356874 0.542623 -> 0.542623 
 62 I B 0.695532 0.276324 0.028144 -> 0.695532 
 63 P E 0.123337 0.413706 0.462957 -> 0.462957 
 64 F B 0.693807 0.279018 0.027175 -> 0.693807 
 65 D E 0.076545 0.461171 0.462284 -> 0.462284 
 66 K E 0.008966 0.218964 0.772070 -> 0.772070 
 67 S E 0.025126 0.142861 0.832013 -> 0.832013 
 68 I M 0.106646 0.497840 0.395514 -> 0.497840 
 69 I B 0.574064 0.365354 0.060582 -> 0.574064 
 70 E E 0.013060 0.216893 0.770047 -> 0.770047 
 71 S E 0.009169 0.117410 0.873421 -> 0.873421 
 72 D E 0.019025 0.201016 0.779959 -> 0.779959 
 73 S E 0.024184 0.224365 0.751452 -> 0.751452 
 74 S E 0.018098 0.160929 0.820973 -> 0.820973 
 75 L M 0.119095 0.447339 0.433566 -> 0.447339 
 76 R E 0.006747 0.066941 0.926311 -> 0.926311 
