# Supplementary material for: AcconPred: Predicting Solvent Accessibility and Contact Number Simultaneously by a Multitask Learning Framework under the Conditional Neural Fields Model
Source: Biomed Res Int. 2015 Aug 3;2015:678764. doi: 10.1155/2015/678764 (PMC4538422; doi:10.1155/2015/678764)
Supplement: Supplementary file 1 — Training/testing dataset as well as the CASP11 evaluation dataset could be found in the Supplementary Material. The CASP11 evaluation dataset contains all detailed results from SPINE-X, SANN, ACCpro5 and AcconPred. [file 678764.f1.zip › Supplmentary_Files/105_casp11_domain/casp11_domain_AcconPred/T0767-D2.reso]

# AcconPred: three-state solvent accessibility prediction results 
# probabilities are in the order of B (Bury, pACC: 0-10), M (Medium, pACC: 11-40) and E (Exposed, pACC: 41-100), 
# where pACC is the relative solvent accessibility value calculated by DSSP 
# output format: <position> <one letter amino acid> <predicted label> ... <probabilities> ... -> <maximal probability> 

 1 S E 0.002854 0.029781 0.967365 -> 0.967365 
 2 E E 0.006681 0.088214 0.905105 -> 0.905105 
 3 D E 0.014450 0.195239 0.790310 -> 0.790310 
 4 K E 0.010496 0.128543 0.860961 -> 0.860961 
 5 G E 0.096360 0.298510 0.605130 -> 0.605130 
 6 D E 0.034434 0.299785 0.665781 -> 0.665781 
 7 D E 0.056729 0.313812 0.629458 -> 0.629458 
 8 M B 0.516922 0.314343 0.168735 -> 0.516922 
 9 S M 0.249687 0.410239 0.340074 -> 0.410239 
 10 T E 0.087664 0.373742 0.538595 -> 0.538595 
 11 L B 0.537891 0.330632 0.131476 -> 0.537891 
 12 V B 0.530117 0.304046 0.165837 -> 0.530117 
 13 G E 0.173478 0.305024 0.521498 -> 0.521498 
 14 T M 0.334572 0.428390 0.237037 -> 0.428390 
 15 V B 0.722449 0.197679 0.079871 -> 0.722449 
 16 L B 0.490298 0.342257 0.167446 -> 0.490298 
 17 S M 0.296026 0.390379 0.313595 -> 0.390379 
 18 G B 0.628526 0.249852 0.121622 -> 0.628526 
 19 F B 0.836680 0.102783 0.060538 -> 0.836680 
 20 E M 0.328910 0.524209 0.146881 -> 0.524209 
 21 Y M 0.247541 0.505706 0.246754 -> 0.505706 
 22 R M 0.144986 0.528882 0.326133 -> 0.528882 
 23 A B 0.719914 0.182448 0.097638 -> 0.719914 
 24 H M 0.295092 0.566571 0.138337 -> 0.566571 
 25 K E 0.021590 0.422166 0.556244 -> 0.556244 
 26 E E 0.011089 0.139991 0.848920 -> 0.848920 
 27 E M 0.148828 0.603678 0.247494 -> 0.603678 
 28 L B 0.700273 0.263454 0.036273 -> 0.700273 
 29 D E 0.004277 0.212310 0.783414 -> 0.783414 
 30 N M 0.054176 0.573564 0.372259 -> 0.573564 
 31 L B 0.922100 0.068556 0.009344 -> 0.922100 
 32 T M 0.246813 0.663046 0.090140 -> 0.663046 
 33 E E 0.003655 0.176852 0.819493 -> 0.819493 
 34 V B 0.877929 0.109215 0.012856 -> 0.877929 
 35 L B 0.870323 0.115768 0.013908 -> 0.870323 
 36 K E 0.002159 0.115771 0.882070 -> 0.882070 
 37 E E 0.006383 0.338846 0.654771 -> 0.654771 
 38 Y M 0.482780 0.501209 0.016011 -> 0.501209 
 39 K E 0.008030 0.237204 0.754766 -> 0.754766 
 40 S E 0.002925 0.050001 0.947074 -> 0.947074 
 41 K E 0.005593 0.120474 0.873933 -> 0.873933 
 42 Y M 0.223313 0.676235 0.100451 -> 0.676235 
 43 K E 0.005583 0.108320 0.886098 -> 0.886098 
 44 Y B 0.433696 0.429892 0.136412 -> 0.433696 
 45 T E 0.108287 0.393218 0.498495 -> 0.498495 
 46 G E 0.138890 0.292605 0.568505 -> 0.568505 
 47 Y M 0.270793 0.616033 0.113174 -> 0.616033 
 48 T M 0.163217 0.525938 0.310844 -> 0.525938 
 49 E E 0.013972 0.234456 0.751572 -> 0.751572 
 50 N E 0.035405 0.257904 0.706691 -> 0.706691 
 51 A B 0.581000 0.332315 0.086685 -> 0.581000 
 52 I B 0.541388 0.380984 0.077628 -> 0.541388 
 53 M E 0.069286 0.410358 0.520356 -> 0.520356 
 54 K E 0.035990 0.311995 0.652015 -> 0.652015 
 55 T M 0.326993 0.446133 0.226874 -> 0.446133 
 56 Q M 0.136387 0.452653 0.410960 -> 0.452653 
 57 N E 0.029474 0.178464 0.792063 -> 0.792063 
 58 S E 0.099017 0.355541 0.545442 -> 0.545442 
 59 G E 0.207450 0.338948 0.453602 -> 0.453602 
 60 F B 0.523655 0.377681 0.098665 -> 0.523655 
 61 R E 0.094685 0.440663 0.464652 -> 0.464652 
 62 N M 0.275429 0.483473 0.241099 -> 0.483473 
 63 E M 0.138926 0.588203 0.272871 -> 0.588203 
 64 Y B 0.623071 0.354801 0.022128 -> 0.623071 
 65 Y B 0.711989 0.279203 0.008808 -> 0.711989 
 66 Y B 0.752026 0.234160 0.013814 -> 0.752026 
 67 L B 0.970601 0.026112 0.003287 -> 0.970601 
 68 T B 0.880875 0.108221 0.010904 -> 0.880875 
 69 A B 0.918261 0.074618 0.007121 -> 0.918261 
 70 I B 0.578504 0.375629 0.045867 -> 0.578504 
 71 P B 0.737553 0.207385 0.055062 -> 0.737553 
 72 Y M 0.186000 0.603935 0.210065 -> 0.603935 
 73 T M 0.156559 0.504412 0.339028 -> 0.504412 
 74 L B 0.619179 0.347641 0.033180 -> 0.619179 
 75 D E 0.006491 0.141879 0.851630 -> 0.851630 
 76 E M 0.123352 0.582809 0.293839 -> 0.582809 
 77 Y B 0.901795 0.084475 0.013730 -> 0.901795 
 78 K M 0.040401 0.660758 0.298840 -> 0.660758 
 79 R E 0.003295 0.074917 0.921788 -> 0.921788 
 80 Y M 0.227119 0.680359 0.092522 -> 0.680359 
 81 F B 0.669513 0.308072 0.022415 -> 0.669513 
 82 Q E 0.019611 0.402146 0.578243 -> 0.578243 
 83 P E 0.104824 0.304546 0.590630 -> 0.590630 
 84 L B 0.554206 0.389568 0.056225 -> 0.554206 
 85 I B 0.517595 0.416620 0.065785 -> 0.517595 
 86 K E 0.004462 0.091505 0.904033 -> 0.904033 
 87 E E 0.016809 0.268088 0.715104 -> 0.715104 
 88 D E 0.033740 0.267570 0.698690 -> 0.698690 
 89 D E 0.060436 0.409617 0.529947 -> 0.529947 
 90 K E 0.011019 0.166064 0.822917 -> 0.822917 
 91 S E 0.055213 0.428431 0.516356 -> 0.516356 
 92 F M 0.377700 0.464657 0.157643 -> 0.464657 
 93 R E 0.012306 0.178086 0.809607 -> 0.809607 
 94 D E 0.013991 0.269939 0.716070 -> 0.716070 
 95 G B 0.624712 0.321293 0.053994 -> 0.624712 
 96 M M 0.439044 0.493583 0.067373 -> 0.493583 
 97 R E 0.009395 0.212579 0.778026 -> 0.778026 
 98 N M 0.071261 0.576991 0.351748 -> 0.576991 
 99 S B 0.776912 0.197296 0.025792 -> 0.776912 
 100 K E 0.010935 0.296900 0.692165 -> 0.692165 
 101 K E 0.005141 0.095116 0.899743 -> 0.899743 
 102 Q E 0.026669 0.216853 0.756479 -> 0.756479 
 103 L M 0.312735 0.560915 0.126350 -> 0.560915 
 104 K E 0.009871 0.122176 0.867953 -> 0.867953 
 105 D E 0.027994 0.233675 0.738331 -> 0.738331 
 106 K E 0.007616 0.132400 0.859984 -> 0.859984 
 107 S E 0.039143 0.233041 0.727816 -> 0.727816 
 108 R M 0.077125 0.642695 0.280181 -> 0.642695 
 109 P B 0.673186 0.271396 0.055418 -> 0.673186 
 110 Y M 0.170012 0.631670 0.198317 -> 0.631670 
 111 V B 0.809501 0.175139 0.015361 -> 0.809501 
 112 V M 0.458821 0.477503 0.063676 -> 0.477503 
 113 T B 0.884047 0.102396 0.013557 -> 0.884047 
 114 T M 0.337025 0.583728 0.079247 -> 0.583728 
 115 L B 0.859694 0.120782 0.019524 -> 0.859694 
 116 F B 0.695605 0.274793 0.029603 -> 0.695605 
 117 S B 0.835216 0.149766 0.015018 -> 0.835216 
 118 T M 0.105617 0.510052 0.384330 -> 0.510052 
 119 K E 0.008262 0.262598 0.729140 -> 0.729140 
 120 D E 0.013074 0.163945 0.822981 -> 0.822981 
 121 N E 0.027758 0.202736 0.769505 -> 0.769505 
 122 F M 0.292867 0.664077 0.043056 -> 0.664077 
 123 T E 0.020775 0.213411 0.765814 -> 0.765814 
 124 K E 0.008637 0.111274 0.880089 -> 0.880089 
 125 D E 0.010517 0.165408 0.824075 -> 0.824075 
 126 N E 0.031202 0.331721 0.637078 -> 0.637078 
 127 T E 0.082812 0.370273 0.546915 -> 0.546915 
 128 I M 0.346606 0.569990 0.083404 -> 0.569990 
 129 D E 0.033981 0.330536 0.635483 -> 0.635483 
 130 E M 0.067300 0.544609 0.388091 -> 0.544609 
 131 M B 0.674264 0.262672 0.063064 -> 0.674264 
 132 I M 0.412484 0.475474 0.112043 -> 0.475474 
 133 D E 0.012438 0.328918 0.658644 -> 0.658644 
 134 F B 0.740493 0.240555 0.018953 -> 0.740493 
 135 S B 0.726854 0.255132 0.018014 -> 0.726854 
 136 E E 0.006685 0.277545 0.715769 -> 0.715769 
 137 V M 0.112994 0.604388 0.282618 -> 0.604388 
 138 L B 0.874204 0.116022 0.009775 -> 0.874204 
 139 K E 0.004270 0.230595 0.765134 -> 0.765134 
 140 K E 0.000410 0.033145 0.966444 -> 0.966444 
 141 K E 0.007449 0.366579 0.625972 -> 0.625972 
 142 K E 0.004022 0.073633 0.922346 -> 0.922346 
 143 N E 0.004294 0.067913 0.927793 -> 0.927793 
 144 I M 0.414667 0.522867 0.062465 -> 0.522867 
 145 P M 0.369838 0.390252 0.239910 -> 0.390252 
 146 H E 0.014652 0.168049 0.817299 -> 0.817299 
 147 D E 0.005656 0.117541 0.876803 -> 0.876803 
 148 L M 0.472289 0.487855 0.039856 -> 0.487855 
 149 N E 0.045129 0.421912 0.532959 -> 0.532959 
 150 V B 0.688096 0.296193 0.015711 -> 0.688096 
 151 S M 0.446100 0.464189 0.089711 -> 0.464189 
 152 L B 0.899658 0.094180 0.006162 -> 0.899658 
 153 Q M 0.312485 0.589284 0.098232 -> 0.589284 
 154 I B 0.917167 0.076700 0.006133 -> 0.917167 
 155 S B 0.496366 0.408770 0.094864 -> 0.496366 
 156 N M 0.110936 0.483054 0.406010 -> 0.483054 
 157 K E 0.061240 0.425741 0.513019 -> 0.513019 
 158 Y M 0.080972 0.511365 0.407662 -> 0.511365 
 159 I B 0.657707 0.316342 0.025951 -> 0.657707 
 160 N M 0.162628 0.536378 0.300994 -> 0.536378 
 161 T M 0.279697 0.437414 0.282888 -> 0.437414 
 162 K E 0.022488 0.237777 0.739735 -> 0.739735 
 163 R M 0.071766 0.508036 0.420198 -> 0.508036 
 164 P M 0.321011 0.352946 0.326043 -> 0.352946 
 165 N E 0.063558 0.259669 0.676773 -> 0.676773 
 166 Y M 0.363766 0.586548 0.049686 -> 0.586548 
 167 S E 0.059768 0.306260 0.633972 -> 0.633972 
 168 K E 0.005104 0.062314 0.932581 -> 0.932581 
 169 K E 0.007683 0.113566 0.878752 -> 0.878752 
 170 E E 0.031268 0.351762 0.616969 -> 0.616969 
 171 V M 0.146767 0.453893 0.399340 -> 0.453893 
 172 I B 0.550140 0.390079 0.059780 -> 0.550140 
 173 E E 0.041255 0.428002 0.530743 -> 0.530743 
 174 V M 0.417139 0.470142 0.112719 -> 0.470142 
 175 G M 0.368933 0.417802 0.213265 -> 0.417802 
 176 V B 0.478983 0.333514 0.187503 -> 0.478983 
 177 F M 0.308796 0.527724 0.163480 -> 0.527724 
 178 N E 0.037659 0.320174 0.642167 -> 0.642167 
 179 H E 0.024978 0.249471 0.725551 -> 0.725551 
 180 E E 0.009640 0.057868 0.932492 -> 0.932492 
