# Supplementary material for: AcconPred: Predicting Solvent Accessibility and Contact Number Simultaneously by a Multitask Learning Framework under the Conditional Neural Fields Model
Source: Biomed Res Int. 2015 Aug 3;2015:678764. doi: 10.1155/2015/678764 (PMC4538422; doi:10.1155/2015/678764)
Supplement: Supplementary file 1 — Training/testing dataset as well as the CASP11 evaluation dataset could be found in the Supplementary Material. The CASP11 evaluation dataset contains all detailed results from SPINE-X, SANN, ACCpro5 and AcconPred. [file 678764.f1.zip › Supplmentary_Files/105_casp11_domain/casp11_domain_AcconPred/T0768-D1.reso]

# AcconPred: three-state solvent accessibility prediction results 
# probabilities are in the order of B (Bury, pACC: 0-10), M (Medium, pACC: 11-40) and E (Exposed, pACC: 41-100), 
# where pACC is the relative solvent accessibility value calculated by DSSP 
# output format: <position> <one letter amino acid> <predicted label> ... <probabilities> ... -> <maximal probability> 

 1 A E 0.015639 0.079426 0.904935 -> 0.904935 
 2 S E 0.054904 0.282541 0.662555 -> 0.662555 
 3 V M 0.184655 0.460786 0.354559 -> 0.460786 
 4 V M 0.338006 0.393037 0.268957 -> 0.393037 
 5 E E 0.027597 0.166510 0.805894 -> 0.805894 
 6 S E 0.050175 0.269130 0.680695 -> 0.680695 
 7 T M 0.428369 0.448987 0.122644 -> 0.448987 
 8 V M 0.096220 0.470580 0.433200 -> 0.470580 
 9 Q E 0.022667 0.370964 0.606369 -> 0.606369 
 10 V B 0.662867 0.311302 0.025831 -> 0.662867 
 11 G B 0.474563 0.442702 0.082734 -> 0.474563 
 12 P E 0.061773 0.351583 0.586643 -> 0.586643 
 13 Y B 0.500666 0.427193 0.072140 -> 0.500666 
 14 T B 0.775959 0.194420 0.029621 -> 0.775959 
 15 F B 0.884596 0.100151 0.015252 -> 0.884596 
 16 E M 0.221245 0.541463 0.237292 -> 0.541463 
 17 I B 0.459230 0.388521 0.152249 -> 0.459230 
 18 W B 0.539603 0.409478 0.050920 -> 0.539603 
 19 F M 0.166671 0.513721 0.319607 -> 0.513721 
 20 D E 0.010744 0.136689 0.852567 -> 0.852567 
 21 G M 0.253334 0.405412 0.341254 -> 0.405412 
 22 T E 0.095055 0.418203 0.486742 -> 0.486742 
 23 A B 0.689986 0.268720 0.041294 -> 0.689986 
 24 T M 0.086382 0.508558 0.405060 -> 0.508558 
 25 L B 0.825481 0.160656 0.013864 -> 0.825481 
 26 T M 0.367705 0.451458 0.180837 -> 0.451458 
 27 R E 0.053341 0.372805 0.573854 -> 0.573854 
 28 Y M 0.279838 0.499472 0.220690 -> 0.499472 
 29 D M 0.317269 0.371363 0.311369 -> 0.371363 
 30 E E 0.076580 0.333045 0.590375 -> 0.590375 
 31 S E 0.088817 0.336572 0.574611 -> 0.574611 
 32 L M 0.367064 0.412219 0.220717 -> 0.412219 
 33 A E 0.210362 0.321874 0.467764 -> 0.467764 
 34 G E 0.102007 0.318547 0.579446 -> 0.579446 
 35 S M 0.319956 0.459862 0.220182 -> 0.459862 
 36 T B 0.709725 0.233696 0.056580 -> 0.709725 
 37 Y B 0.657345 0.301500 0.041154 -> 0.657345 
 38 A M 0.303476 0.492555 0.203969 -> 0.492555 
 39 D E 0.056373 0.299290 0.644338 -> 0.644338 
 40 I B 0.832692 0.160894 0.006414 -> 0.832692 
 41 P E 0.035629 0.284286 0.680085 -> 0.680085 
 42 A E 0.079533 0.231639 0.688828 -> 0.688828 
 43 S M 0.152907 0.447973 0.399121 -> 0.447973 
 44 V M 0.207105 0.557194 0.235701 -> 0.557194 
 45 T E 0.105440 0.402568 0.491992 -> 0.491992 
 46 D E 0.095881 0.388704 0.515414 -> 0.515414 
 47 E E 0.011298 0.139674 0.849028 -> 0.849028 
 48 N E 0.073960 0.274266 0.651774 -> 0.651774 
 49 G E 0.077366 0.230443 0.692191 -> 0.692191 
 50 Q E 0.045337 0.306601 0.648062 -> 0.648062 
 51 E E 0.010580 0.147157 0.842264 -> 0.842264 
 52 Y M 0.237445 0.586734 0.175821 -> 0.586734 
 53 P E 0.109385 0.364671 0.525944 -> 0.525944 
 54 V B 0.749346 0.237017 0.013637 -> 0.749346 
 55 T M 0.198657 0.576969 0.224374 -> 0.576969 
 56 V M 0.187554 0.580344 0.232102 -> 0.580344 
 57 I B 0.748615 0.212113 0.039272 -> 0.748615 
 58 G M 0.294760 0.523812 0.181428 -> 0.523812 
 59 E E 0.065153 0.330763 0.604084 -> 0.604084 
 60 K M 0.125586 0.531669 0.342746 -> 0.531669 
 61 A B 0.925079 0.064644 0.010276 -> 0.925079 
 62 F B 0.606316 0.318765 0.074919 -> 0.606316 
 63 E E 0.061110 0.363200 0.575690 -> 0.575690 
 64 E E 0.078258 0.378121 0.543621 -> 0.543621 
 65 T M 0.351128 0.497309 0.151563 -> 0.497309 
 66 N E 0.051452 0.437697 0.510850 -> 0.510850 
 67 I B 0.901341 0.095633 0.003026 -> 0.901341 
 68 T M 0.047513 0.595956 0.356531 -> 0.595956 
 69 G M 0.148842 0.499247 0.351911 -> 0.499247 
 70 V B 0.825204 0.169949 0.004847 -> 0.825204 
 71 T E 0.029691 0.404637 0.565672 -> 0.565672 
 72 V B 0.790886 0.203088 0.006026 -> 0.790886 
 73 P M 0.129003 0.643166 0.227831 -> 0.643166 
 74 D E 0.015838 0.141339 0.842822 -> 0.842822 
 75 S M 0.105401 0.459366 0.435233 -> 0.459366 
 76 V B 0.806345 0.178351 0.015304 -> 0.806345 
 77 I E 0.088203 0.433137 0.478660 -> 0.478660 
 78 S M 0.106421 0.544669 0.348910 -> 0.544669 
 79 I B 0.902565 0.084344 0.013091 -> 0.902565 
 80 G B 0.504842 0.438311 0.056847 -> 0.504842 
 81 R E 0.026116 0.310495 0.663388 -> 0.663388 
 82 L M 0.375535 0.525060 0.099405 -> 0.525060 
 83 A B 0.940684 0.047087 0.012230 -> 0.940684 
 84 F B 0.707044 0.256845 0.036111 -> 0.707044 
 85 A E 0.129319 0.355320 0.515361 -> 0.515361 
 86 Y E 0.102145 0.444461 0.453394 -> 0.453394 
 87 C B 0.624642 0.321172 0.054186 -> 0.624642 
 88 N E 0.073586 0.328739 0.597675 -> 0.597675 
 89 S E 0.068960 0.310095 0.620945 -> 0.620945 
 90 L B 0.477748 0.447262 0.074990 -> 0.477748 
 91 S M 0.094808 0.476687 0.428506 -> 0.476687 
 92 D E 0.034699 0.368627 0.596673 -> 0.596673 
 93 V B 0.777518 0.216083 0.006399 -> 0.777518 
 94 K E 0.009083 0.276750 0.714167 -> 0.714167 
 95 L B 0.821807 0.168755 0.009438 -> 0.821807 
 96 S M 0.196575 0.634503 0.168922 -> 0.634503 
 97 E E 0.013391 0.177905 0.808704 -> 0.808704 
 98 N M 0.206466 0.583208 0.210326 -> 0.583208 
 99 L B 0.865983 0.125196 0.008821 -> 0.865983 
 100 I E 0.085539 0.429381 0.485080 -> 0.485080 
 101 Y M 0.044122 0.506809 0.449070 -> 0.506809 
 102 I B 0.938698 0.054569 0.006733 -> 0.938698 
 103 N B 0.506615 0.447795 0.045590 -> 0.506615 
 104 E E 0.040290 0.340013 0.619697 -> 0.619697 
 105 L M 0.329456 0.592715 0.077830 -> 0.592715 
 106 A B 0.949131 0.044841 0.006028 -> 0.949131 
 107 F B 0.944291 0.050767 0.004942 -> 0.944291 
 108 A M 0.100900 0.459886 0.439214 -> 0.459886 
 109 S E 0.068076 0.377671 0.554254 -> 0.554254 
 110 C B 0.665008 0.316008 0.018985 -> 0.665008 
 111 D E 0.027111 0.236539 0.736350 -> 0.736350 
 112 A E 0.096551 0.440171 0.463278 -> 0.463278 
 113 L B 0.829337 0.166885 0.003777 -> 0.829337 
 114 K E 0.009243 0.282256 0.708501 -> 0.708501 
 115 E M 0.035917 0.528744 0.435339 -> 0.528744 
 116 I B 0.910973 0.085010 0.004017 -> 0.910973 
 117 T M 0.051192 0.537431 0.411377 -> 0.537431 
 118 I B 0.950083 0.046900 0.003017 -> 0.950083 
 119 P M 0.275963 0.604602 0.119435 -> 0.604602 
 120 A E 0.022821 0.181795 0.795384 -> 0.795384 
 121 S M 0.152362 0.520530 0.327108 -> 0.520530 
 122 V B 0.703494 0.270978 0.025528 -> 0.703494 
 123 E E 0.015768 0.241372 0.742860 -> 0.742860 
 124 K E 0.018734 0.330791 0.650475 -> 0.650475 
 125 M B 0.517066 0.445092 0.037842 -> 0.517066 
 126 D M 0.115327 0.464759 0.419914 -> 0.464759 
 127 N M 0.175243 0.632792 0.191965 -> 0.632792 
 128 P B 0.784061 0.158925 0.057013 -> 0.784061 
 129 F B 0.885726 0.097942 0.016333 -> 0.885726 
 130 R E 0.048369 0.388467 0.563164 -> 0.563164 
 131 W E 0.049576 0.373945 0.576480 -> 0.576480 
 132 S B 0.636160 0.340576 0.023264 -> 0.636160 
 133 N E 0.030243 0.278319 0.691437 -> 0.691437 
 134 A E 0.083692 0.410196 0.506112 -> 0.506112 
 135 L B 0.853716 0.144059 0.002225 -> 0.853716 
 136 D M 0.040912 0.505297 0.453791 -> 0.505297 
 137 T M 0.078862 0.690258 0.230879 -> 0.690258 
 138 V B 0.927366 0.069200 0.003434 -> 0.927366 
 139 Y M 0.033503 0.552153 0.414343 -> 0.552153 
 140 M B 0.845015 0.142249 0.012736 -> 0.845015 
 141 E E 0.008477 0.191767 0.799756 -> 0.799756 
 142 G E 0.007508 0.132748 0.859744 -> 0.859744 
 143 M E 0.008052 0.233515 0.758433 -> 0.758433 
