# Supplementary material for: AcconPred: Predicting Solvent Accessibility and Contact Number Simultaneously by a Multitask Learning Framework under the Conditional Neural Fields Model
Source: Biomed Res Int. 2015 Aug 3;2015:678764. doi: 10.1155/2015/678764 (PMC4538422; doi:10.1155/2015/678764)
Supplement: Supplementary file 1 — Training/testing dataset as well as the CASP11 evaluation dataset could be found in the Supplementary Material. The CASP11 evaluation dataset contains all detailed results from SPINE-X, SANN, ACCpro5 and AcconPred. [file 678764.f1.zip › Supplmentary_Files/105_casp11_domain/casp11_domain_AcconPred/T0769-D1.reso]

# AcconPred: three-state solvent accessibility prediction results 
# probabilities are in the order of B (Bury, pACC: 0-10), M (Medium, pACC: 11-40) and E (Exposed, pACC: 41-100), 
# where pACC is the relative solvent accessibility value calculated by DSSP 
# output format: <position> <one letter amino acid> <predicted label> ... <probabilities> ... -> <maximal probability> 

 1 M E 0.005557 0.052393 0.942050 -> 0.942050 
 2 L M 0.140481 0.577563 0.281955 -> 0.577563 
 3 T E 0.030709 0.302725 0.666567 -> 0.666567 
 4 V B 0.475368 0.426295 0.098338 -> 0.475368 
 5 E E 0.007867 0.270035 0.722099 -> 0.722099 
 6 V B 0.675446 0.311496 0.013058 -> 0.675446 
 7 E E 0.011477 0.372982 0.615540 -> 0.615540 
 8 V B 0.741524 0.246893 0.011584 -> 0.741524 
 9 K E 0.006942 0.305339 0.687719 -> 0.687719 
 10 I B 0.712940 0.272706 0.014354 -> 0.712940 
 11 T M 0.046902 0.529146 0.423953 -> 0.529146 
 12 A M 0.242337 0.437106 0.320556 -> 0.437106 
 13 D E 0.011666 0.227181 0.761154 -> 0.761154 
 14 D E 0.039360 0.293658 0.666982 -> 0.666982 
 15 E E 0.019971 0.165603 0.814426 -> 0.814426 
 16 N E 0.030238 0.266264 0.703497 -> 0.703497 
 17 K M 0.046721 0.518257 0.435022 -> 0.518257 
 18 A B 0.714174 0.230780 0.055046 -> 0.714174 
 19 E E 0.023489 0.438921 0.537590 -> 0.537590 
 20 E E 0.015934 0.297266 0.686800 -> 0.686800 
 21 I B 0.744656 0.239841 0.015503 -> 0.744656 
 22 V B 0.853517 0.131530 0.014953 -> 0.853517 
 23 K E 0.005388 0.241456 0.753156 -> 0.753156 
 24 R E 0.015809 0.430633 0.553558 -> 0.553558 
 25 V B 0.868594 0.122487 0.008918 -> 0.868594 
 26 I B 0.617323 0.356219 0.026458 -> 0.617323 
 27 D E 0.006806 0.208573 0.784621 -> 0.784621 
 28 E E 0.027371 0.456895 0.515733 -> 0.515733 
 29 V B 0.864818 0.125331 0.009851 -> 0.864818 
 30 E M 0.064175 0.664557 0.271268 -> 0.664557 
 31 R E 0.003092 0.134668 0.862240 -> 0.862240 
 32 E M 0.041300 0.551277 0.407423 -> 0.551277 
 33 V B 0.637415 0.334305 0.028280 -> 0.637415 
 34 Q E 0.018847 0.386956 0.594197 -> 0.594197 
 35 K E 0.001059 0.060134 0.938807 -> 0.938807 
 36 Q E 0.004545 0.122675 0.872780 -> 0.872780 
 37 Y M 0.225147 0.679386 0.095468 -> 0.679386 
 38 P E 0.020165 0.140550 0.839285 -> 0.839285 
 39 N E 0.007089 0.126745 0.866166 -> 0.866166 
 40 A B 0.467349 0.420659 0.111992 -> 0.467349 
 41 T E 0.054271 0.324147 0.621582 -> 0.621582 
 42 I B 0.555592 0.412201 0.032207 -> 0.555592 
 43 T E 0.045988 0.390079 0.563933 -> 0.563933 
 44 R M 0.086474 0.551370 0.362156 -> 0.551370 
 45 T M 0.090731 0.457622 0.451647 -> 0.457622 
 46 L B 0.526990 0.436312 0.036698 -> 0.526990 
 47 T E 0.069987 0.419039 0.510974 -> 0.510974 
 48 R E 0.042403 0.384882 0.572715 -> 0.572715 
 49 D E 0.010763 0.168531 0.820706 -> 0.820706 
 50 D E 0.008224 0.076498 0.915277 -> 0.915277 
 51 G E 0.184883 0.353368 0.461750 -> 0.461750 
 52 T M 0.097311 0.499895 0.402793 -> 0.499895 
 53 V B 0.698627 0.269992 0.031381 -> 0.698627 
 54 E M 0.060605 0.544362 0.395032 -> 0.544362 
 55 L B 0.819868 0.173112 0.007020 -> 0.819868 
 56 R M 0.035583 0.628018 0.336399 -> 0.628018 
 57 I B 0.875435 0.120907 0.003658 -> 0.875435 
 58 K E 0.008415 0.354475 0.637110 -> 0.637110 
 59 V B 0.698067 0.276073 0.025860 -> 0.698067 
 60 K E 0.009912 0.262933 0.727155 -> 0.727155 
 61 A M 0.218884 0.449726 0.331389 -> 0.449726 
 62 D E 0.017283 0.248826 0.733892 -> 0.733892 
 63 T M 0.108212 0.471960 0.419828 -> 0.471960 
 64 E E 0.021461 0.192780 0.785759 -> 0.785759 
 65 E E 0.006358 0.098830 0.894812 -> 0.894812 
 66 K M 0.070885 0.622230 0.306885 -> 0.622230 
 67 A B 0.829005 0.138751 0.032244 -> 0.829005 
 68 K E 0.008978 0.275712 0.715310 -> 0.715310 
 69 S M 0.167877 0.536710 0.295412 -> 0.536710 
 70 I B 0.911884 0.079461 0.008656 -> 0.911884 
 71 I B 0.740612 0.240567 0.018820 -> 0.740612 
 72 K E 0.004443 0.218511 0.777046 -> 0.777046 
 73 L M 0.327470 0.586265 0.086265 -> 0.586265 
 74 I B 0.912567 0.077321 0.010112 -> 0.912567 
 75 E M 0.063926 0.664213 0.271861 -> 0.664213 
 76 E E 0.004272 0.110590 0.885138 -> 0.885138 
 77 R M 0.048759 0.528914 0.422327 -> 0.528914 
 78 I B 0.751144 0.225966 0.022890 -> 0.751144 
 79 E E 0.016302 0.465309 0.518389 -> 0.518389 
 80 E E 0.005861 0.136121 0.858018 -> 0.858018 
 81 E M 0.085173 0.618309 0.296518 -> 0.618309 
 82 L B 0.613397 0.354083 0.032520 -> 0.613397 
 83 R E 0.006694 0.267408 0.725897 -> 0.725897 
 84 K E 0.001275 0.051767 0.946958 -> 0.946958 
 85 R E 0.015998 0.274539 0.709463 -> 0.709463 
 86 D M 0.058498 0.578899 0.362602 -> 0.578899 
 87 P E 0.016986 0.115916 0.867098 -> 0.867098 
 88 N E 0.004408 0.077306 0.918286 -> 0.918286 
 89 A M 0.368878 0.519638 0.111484 -> 0.519638 
 90 T E 0.032947 0.259496 0.707557 -> 0.707557 
 91 I M 0.383181 0.535873 0.080946 -> 0.535873 
 92 T E 0.046346 0.425801 0.527852 -> 0.527852 
 93 R E 0.054499 0.460187 0.485314 -> 0.485314 
 94 T E 0.051925 0.341093 0.606982 -> 0.606982 
 95 V M 0.230044 0.510634 0.259322 -> 0.510634 
 96 R E 0.014437 0.198335 0.787227 -> 0.787227 
 97 T E 0.010484 0.046105 0.943411 -> 0.943411 
