# Supplementary material for: AcconPred: Predicting Solvent Accessibility and Contact Number Simultaneously by a Multitask Learning Framework under the Conditional Neural Fields Model
Source: Biomed Res Int. 2015 Aug 3;2015:678764. doi: 10.1155/2015/678764 (PMC4538422; doi:10.1155/2015/678764)
Supplement: Supplementary file 1 — Training/testing dataset as well as the CASP11 evaluation dataset could be found in the Supplementary Material. The CASP11 evaluation dataset contains all detailed results from SPINE-X, SANN, ACCpro5 and AcconPred. [file 678764.f1.zip › Supplmentary_Files/105_casp11_domain/casp11_domain_AcconPred/T0770-D1.reso]

# AcconPred: three-state solvent accessibility prediction results 
# probabilities are in the order of B (Bury, pACC: 0-10), M (Medium, pACC: 11-40) and E (Exposed, pACC: 41-100), 
# where pACC is the relative solvent accessibility value calculated by DSSP 
# output format: <position> <one letter amino acid> <predicted label> ... <probabilities> ... -> <maximal probability> 

 1 P E 0.002092 0.028757 0.969150 -> 0.969150 
 2 N E 0.067838 0.423748 0.508413 -> 0.508413 
 3 T E 0.010750 0.200595 0.788654 -> 0.788654 
 4 A M 0.180626 0.527473 0.291901 -> 0.527473 
 5 E E 0.012600 0.172217 0.815183 -> 0.815183 
 6 K E 0.002238 0.076723 0.921039 -> 0.921039 
 7 V M 0.424950 0.523843 0.051207 -> 0.523843 
 8 D E 0.031274 0.390553 0.578173 -> 0.578173 
 9 P M 0.243014 0.541489 0.215497 -> 0.541489 
 10 G M 0.151373 0.447191 0.401436 -> 0.447191 
 11 Y M 0.285107 0.592177 0.122716 -> 0.592177 
 12 L B 0.759797 0.205375 0.034828 -> 0.759797 
 13 F B 0.906110 0.075988 0.017903 -> 0.906110 
 14 N B 0.619735 0.316958 0.063306 -> 0.619735 
 15 Y B 0.526389 0.413359 0.060252 -> 0.526389 
 16 V B 0.975408 0.019134 0.005458 -> 0.975408 
 17 A B 0.938151 0.055149 0.006699 -> 0.938151 
 18 V B 0.766066 0.198662 0.035272 -> 0.766066 
 19 N B 0.673648 0.274952 0.051400 -> 0.673648 
 20 W B 0.810585 0.176819 0.012596 -> 0.810585 
 21 A B 0.820792 0.158779 0.020429 -> 0.820792 
 22 G B 0.695482 0.229985 0.074534 -> 0.695482 
 23 T B 0.765417 0.199551 0.035032 -> 0.765417 
 24 R B 0.615515 0.319016 0.065469 -> 0.615515 
 25 T B 0.877684 0.105819 0.016497 -> 0.877684 
 26 G B 0.898368 0.090335 0.011297 -> 0.898368 
 27 G B 0.828570 0.157807 0.013624 -> 0.828570 
 28 D B 0.813758 0.163100 0.023142 -> 0.813758 
 29 F B 0.928540 0.065684 0.005776 -> 0.928540 
 30 Y B 0.732522 0.249765 0.017713 -> 0.732522 
 31 I B 0.935919 0.057354 0.006727 -> 0.935919 
 32 P B 0.936427 0.056391 0.007183 -> 0.936427 
 33 L B 0.935653 0.059726 0.004621 -> 0.935653 
 34 S B 0.922618 0.071516 0.005866 -> 0.922618 
 35 M B 0.932843 0.061346 0.005811 -> 0.932843 
 36 S B 0.909439 0.082288 0.008273 -> 0.909439 
 37 S B 0.890737 0.098007 0.011256 -> 0.890737 
 38 Q B 0.842972 0.134659 0.022369 -> 0.842972 
 39 C B 0.880084 0.110794 0.009122 -> 0.880084 
 40 Q B 0.803775 0.171548 0.024677 -> 0.803775 
 41 V B 0.686981 0.273881 0.039139 -> 0.686981 
 42 D B 0.473973 0.351449 0.174578 -> 0.473973 
 43 G B 0.536059 0.272530 0.191411 -> 0.536059 
 44 G B 0.400330 0.325363 0.274307 -> 0.400330 
 45 L B 0.412828 0.393476 0.193696 -> 0.412828 
 46 D B 0.459054 0.345732 0.195214 -> 0.459054 
 47 Y M 0.411605 0.431342 0.157053 -> 0.431342 
 48 G B 0.435760 0.326585 0.237655 -> 0.435760 
 49 G B 0.571533 0.270850 0.157617 -> 0.571533 
 50 W B 0.500789 0.403672 0.095539 -> 0.500789 
 51 D B 0.521108 0.341505 0.137387 -> 0.521108 
 52 E B 0.460072 0.414537 0.125391 -> 0.460072 
 53 S B 0.751516 0.193040 0.055444 -> 0.751516 
 54 V B 0.478053 0.388028 0.133919 -> 0.478053 
 55 Y B 0.657214 0.298635 0.044150 -> 0.657214 
 56 T M 0.314541 0.457804 0.227654 -> 0.457804 
 57 I B 0.698985 0.265730 0.035285 -> 0.698985 
 58 S B 0.617476 0.292874 0.089650 -> 0.617476 
 59 P M 0.305847 0.365704 0.328449 -> 0.365704 
 60 Y E 0.120404 0.417525 0.462071 -> 0.462071 
 61 S M 0.322805 0.483943 0.193252 -> 0.483943 
 62 T B 0.723402 0.188403 0.088195 -> 0.723402 
 63 G M 0.302581 0.397404 0.300015 -> 0.397404 
 64 N M 0.328224 0.468122 0.203654 -> 0.468122 
 65 T B 0.720449 0.222952 0.056599 -> 0.720449 
 66 W B 0.920939 0.073028 0.006033 -> 0.920939 
 67 K M 0.096003 0.647382 0.256616 -> 0.647382 
 68 H M 0.289292 0.541895 0.168813 -> 0.541895 
 69 Y B 0.902224 0.088072 0.009704 -> 0.902224 
 70 Y B 0.893436 0.097851 0.008713 -> 0.893436 
 71 S M 0.189250 0.616181 0.194569 -> 0.616181 
 72 V B 0.742103 0.233378 0.024520 -> 0.742103 
 73 G B 0.967137 0.028469 0.004394 -> 0.967137 
 74 G B 0.799271 0.185895 0.014834 -> 0.799271 
 75 N M 0.353028 0.456703 0.190269 -> 0.456703 
 76 N B 0.900312 0.090784 0.008904 -> 0.900312 
 77 L B 0.965567 0.031182 0.003250 -> 0.965567 
 78 M M 0.283271 0.543022 0.173706 -> 0.543022 
 79 L M 0.328615 0.577515 0.093870 -> 0.577515 
 80 A B 0.881009 0.102705 0.016286 -> 0.881009 
 81 I B 0.465006 0.464074 0.070921 -> 0.465006 
 82 K E 0.019193 0.213290 0.767517 -> 0.767517 
 83 N M 0.157542 0.536668 0.305791 -> 0.536668 
 84 A B 0.526920 0.373503 0.099577 -> 0.526920 
 85 E E 0.011936 0.127653 0.860411 -> 0.860411 
 86 E E 0.007416 0.114636 0.877948 -> 0.877948 
 87 A E 0.049408 0.233544 0.717048 -> 0.717048 
 88 D E 0.059439 0.375876 0.564685 -> 0.564685 
 89 P E 0.021934 0.050498 0.927568 -> 0.927568 
 90 V E 0.057686 0.399635 0.542679 -> 0.542679 
 91 N B 0.513033 0.436212 0.050755 -> 0.513033 
 92 H M 0.079661 0.515501 0.404838 -> 0.515501 
 93 N M 0.297815 0.599610 0.102574 -> 0.599610 
 94 A B 0.888376 0.100174 0.011450 -> 0.888376 
 95 I B 0.593056 0.387111 0.019833 -> 0.593056 
 96 A B 0.912074 0.067605 0.020321 -> 0.912074 
 97 Q B 0.938421 0.055065 0.006514 -> 0.938421 
 98 C B 0.996572 0.002811 0.000618 -> 0.996572 
 99 K B 0.512937 0.464435 0.022627 -> 0.512937 
 100 I B 0.979409 0.018206 0.002385 -> 0.979409 
 101 L B 0.996813 0.002773 0.000415 -> 0.996813 
 102 L B 0.940704 0.057068 0.002228 -> 0.940704 
 103 A B 0.994430 0.004231 0.001339 -> 0.994430 
 104 E B 0.965072 0.032398 0.002531 -> 0.965072 
 105 H B 0.988287 0.010557 0.001156 -> 0.988287 
 106 M B 0.968236 0.030193 0.001571 -> 0.968236 
 107 Y B 0.886903 0.109081 0.004016 -> 0.886903 
 108 E B 0.668211 0.318857 0.012932 -> 0.668211 
 109 A B 0.996205 0.003013 0.000783 -> 0.996205 
 110 T B 0.982173 0.016985 0.000842 -> 0.982173 
 111 M M 0.418696 0.524485 0.056819 -> 0.524485 
 112 L B 0.620053 0.336685 0.043262 -> 0.620053 
 113 W B 0.670865 0.310921 0.018215 -> 0.670865 
 114 G B 0.744931 0.226341 0.028728 -> 0.744931 
 115 D M 0.112090 0.508710 0.379199 -> 0.508710 
 116 I B 0.759499 0.210917 0.029584 -> 0.759499 
 117 P B 0.757078 0.215180 0.027742 -> 0.757078 
 118 F B 0.658134 0.314323 0.027543 -> 0.658134 
 119 T M 0.215438 0.539300 0.245262 -> 0.539300 
 120 E E 0.064285 0.326238 0.609477 -> 0.609477 
 121 S M 0.205866 0.420069 0.374065 -> 0.420069 
 122 W M 0.431358 0.458337 0.110305 -> 0.458337 
 123 N E 0.026939 0.237778 0.735283 -> 0.735283 
 124 G E 0.092867 0.289844 0.617289 -> 0.617289 
 125 T E 0.038241 0.179323 0.782436 -> 0.782436 
 126 I M 0.250601 0.493228 0.256171 -> 0.493228 
 127 K E 0.016885 0.196222 0.786893 -> 0.786893 
 128 Y M 0.153932 0.538027 0.308041 -> 0.538027 
 129 P M 0.387399 0.443638 0.168963 -> 0.443638 
 130 K E 0.007181 0.127619 0.865200 -> 0.865200 
 131 F B 0.500040 0.430830 0.069130 -> 0.500040 
 132 D M 0.191542 0.511307 0.297151 -> 0.511307 
 133 S M 0.096274 0.513011 0.390715 -> 0.513011 
 134 Q M 0.132055 0.715436 0.152509 -> 0.715436 
 135 E E 0.010645 0.228344 0.761011 -> 0.761011 
 136 S M 0.145111 0.528389 0.326500 -> 0.528389 
 137 V B 0.971690 0.024559 0.003751 -> 0.971690 
 138 L B 0.771487 0.221670 0.006842 -> 0.771487 
 139 N E 0.007018 0.143514 0.849468 -> 0.849468 
 140 G M 0.339596 0.629452 0.030952 -> 0.629452 
 141 V B 0.996005 0.003285 0.000710 -> 0.996005 
 142 L M 0.289920 0.695209 0.014871 -> 0.695209 
 143 S E 0.007389 0.152875 0.839737 -> 0.839737 
 144 L M 0.475013 0.517715 0.007273 -> 0.517715 
 145 L B 0.981114 0.017135 0.001750 -> 0.981114 
 146 D E 0.011700 0.371976 0.616324 -> 0.616324 
 147 E M 0.042448 0.661095 0.296456 -> 0.661095 
 148 A B 0.996141 0.002952 0.000907 -> 0.996141 
 149 L M 0.312013 0.669286 0.018701 -> 0.669286 
 150 Q E 0.001180 0.014141 0.984679 -> 0.984679 
 151 I M 0.227171 0.737704 0.035125 -> 0.737704 
 152 M B 0.920514 0.077171 0.002315 -> 0.920514 
 153 D E 0.008530 0.193821 0.797649 -> 0.797649 
 154 L E 0.049724 0.358372 0.591904 -> 0.591904 
 155 N E 0.052960 0.384134 0.562906 -> 0.562906 
 156 D E 0.030481 0.308892 0.660627 -> 0.660627 
 157 A E 0.101912 0.250655 0.647433 -> 0.647433 
 158 N E 0.047652 0.214998 0.737350 -> 0.737350 
 159 A M 0.257967 0.371068 0.370965 -> 0.371068 
 160 I M 0.316017 0.522645 0.161339 -> 0.522645 
 161 D E 0.076039 0.349510 0.574451 -> 0.574451 
 162 E E 0.068685 0.313703 0.617612 -> 0.617612 
 163 Y M 0.201623 0.534184 0.264193 -> 0.534184 
 164 D B 0.615486 0.302634 0.081880 -> 0.615486 
 165 I B 0.539246 0.364327 0.096427 -> 0.539246 
 166 Y B 0.680205 0.245543 0.074251 -> 0.680205 
 167 Y M 0.448703 0.468649 0.082647 -> 0.468649 
 168 K E 0.055464 0.381188 0.563348 -> 0.563348 
 169 G B 0.599716 0.278277 0.122007 -> 0.599716 
 170 D M 0.180615 0.628149 0.191236 -> 0.628149 
 171 M B 0.752568 0.219179 0.028253 -> 0.752568 
 172 N M 0.210486 0.470195 0.319319 -> 0.470195 
 173 K M 0.192254 0.626642 0.181104 -> 0.626642 
 174 W B 0.974036 0.023116 0.002848 -> 0.974036 
 175 M B 0.748087 0.243051 0.008862 -> 0.748087 
 176 T B 0.522199 0.419374 0.058426 -> 0.522199 
 177 L B 0.990013 0.006847 0.003140 -> 0.990013 
 178 A B 0.997004 0.002289 0.000707 -> 0.997004 
 179 K B 0.644490 0.331971 0.023539 -> 0.644490 
 180 S B 0.963265 0.032456 0.004278 -> 0.963265 
 181 L B 0.992515 0.006470 0.001015 -> 0.992515 
 182 K B 0.859081 0.136490 0.004429 -> 0.859081 
 183 F B 0.991122 0.007673 0.001206 -> 0.991122 
 184 R B 0.703235 0.288467 0.008298 -> 0.703235 
 185 T B 0.977042 0.021017 0.001941 -> 0.977042 
 186 L B 0.921064 0.071910 0.007025 -> 0.921064 
 187 M B 0.953620 0.042782 0.003597 -> 0.953620 
 188 V B 0.519390 0.424015 0.056595 -> 0.519390 
 189 M B 0.600349 0.348121 0.051530 -> 0.600349 
 190 V M 0.372896 0.421319 0.205785 -> 0.421319 
 191 D E 0.071762 0.258537 0.669702 -> 0.669702 
 192 K M 0.049829 0.492094 0.458078 -> 0.492094 
 193 D E 0.066449 0.265089 0.668462 -> 0.668462 
 194 P M 0.119432 0.449814 0.430754 -> 0.449814 
 195 S B 0.652653 0.160771 0.186576 -> 0.652653 
 196 K M 0.049779 0.529893 0.420328 -> 0.529893 
 197 A B 0.744774 0.099843 0.155383 -> 0.744774 
 198 T M 0.367910 0.521165 0.110925 -> 0.521165 
 199 A B 0.750554 0.133262 0.116185 -> 0.750554 
 200 I B 0.688637 0.269220 0.042143 -> 0.688637 
 201 G B 0.644958 0.289111 0.065931 -> 0.644958 
 202 T M 0.391723 0.451362 0.156915 -> 0.451362 
 203 L B 0.587802 0.337854 0.074344 -> 0.587802 
 204 L B 0.639453 0.303611 0.056935 -> 0.639453 
 205 Q E 0.198175 0.390332 0.411494 -> 0.411494 
 206 A E 0.134097 0.238093 0.627810 -> 0.627810 
 207 G E 0.085972 0.304273 0.609756 -> 0.609756 
 208 G E 0.161900 0.342370 0.495730 -> 0.495730 
 209 M M 0.313842 0.436781 0.249377 -> 0.436781 
 210 V B 0.747247 0.217858 0.034895 -> 0.747247 
 211 S E 0.192194 0.379201 0.428606 -> 0.428606 
 212 S M 0.310268 0.440365 0.249367 -> 0.440365 
 213 A M 0.216750 0.397033 0.386217 -> 0.397033 
 214 S E 0.214451 0.290020 0.495530 -> 0.495530 
 215 D M 0.223854 0.470899 0.305247 -> 0.470899 
 216 N M 0.373506 0.405629 0.220865 -> 0.405629 
 217 L B 0.730213 0.236059 0.033728 -> 0.730213 
 218 V M 0.268949 0.466541 0.264510 -> 0.466541 
 219 F B 0.602794 0.342684 0.054521 -> 0.602794 
 220 P E 0.111414 0.374338 0.514249 -> 0.514249 
 221 Y M 0.425129 0.465244 0.109627 -> 0.465244 
 222 S E 0.125568 0.411804 0.462628 -> 0.462628 
 223 A E 0.139729 0.314258 0.546013 -> 0.546013 
 224 E M 0.136908 0.460721 0.402371 -> 0.460721 
 225 P E 0.059916 0.264031 0.676053 -> 0.676053 
 226 G E 0.153342 0.342317 0.504342 -> 0.504342 
 227 N M 0.284293 0.454066 0.261641 -> 0.454066 
 228 Q M 0.156581 0.421987 0.421432 -> 0.421987 
 229 N B 0.603035 0.299320 0.097645 -> 0.603035 
 230 P B 0.440020 0.340435 0.219545 -> 0.440020 
 231 K M 0.221744 0.392184 0.386072 -> 0.392184 
 232 Y B 0.564892 0.336476 0.098631 -> 0.564892 
 233 E B 0.562233 0.339889 0.097878 -> 0.562233 
 234 L B 0.835825 0.135888 0.028287 -> 0.835825 
 235 I B 0.861406 0.118942 0.019652 -> 0.861406 
 236 E B 0.709930 0.237184 0.052887 -> 0.709930 
 237 L B 0.809101 0.163027 0.027871 -> 0.809101 
 238 V B 0.720295 0.239896 0.039809 -> 0.720295 
 239 G B 0.683587 0.203233 0.113180 -> 0.683587 
 240 G B 0.683590 0.234959 0.081451 -> 0.683590 
 241 T B 0.594744 0.294165 0.111091 -> 0.594744 
 242 Q B 0.587659 0.328161 0.084180 -> 0.587659 
 243 I B 0.755235 0.214425 0.030340 -> 0.755235 
 244 L B 0.686523 0.275700 0.037777 -> 0.686523 
 245 F B 0.834475 0.143739 0.021787 -> 0.834475 
 246 F B 0.707586 0.266565 0.025849 -> 0.707586 
 247 A B 0.930130 0.065191 0.004679 -> 0.930130 
 248 S B 0.908485 0.084525 0.006990 -> 0.908485 
 249 N M 0.294376 0.541431 0.164194 -> 0.541431 
 250 Y M 0.206929 0.646274 0.146797 -> 0.646274 
 251 M B 0.926267 0.064990 0.008743 -> 0.926267 
 252 L B 0.669107 0.317695 0.013198 -> 0.669107 
 253 K E 0.033046 0.374730 0.592223 -> 0.592223 
 254 P B 0.584718 0.336196 0.079086 -> 0.584718 
 255 M B 0.786182 0.186281 0.027538 -> 0.786182 
 256 Q M 0.076959 0.553724 0.369317 -> 0.553724 
 257 E E 0.023997 0.281849 0.694154 -> 0.694154 
 258 R E 0.058915 0.430030 0.511054 -> 0.511054 
 259 N E 0.036546 0.215983 0.747471 -> 0.747471 
 260 D B 0.761307 0.201016 0.037677 -> 0.761307 
 261 P E 0.296158 0.337483 0.366359 -> 0.366359 
 262 R B 0.413674 0.389768 0.196558 -> 0.413674 
 263 I B 0.545922 0.411801 0.042277 -> 0.545922 
 264 P E 0.164296 0.384866 0.450838 -> 0.450838 
 265 C B 0.479189 0.364267 0.156544 -> 0.479189 
 266 Y B 0.565963 0.348715 0.085322 -> 0.565963 
 267 F B 0.738085 0.234743 0.027171 -> 0.738085 
 268 E M 0.150306 0.528608 0.321086 -> 0.528608 
 269 P E 0.134609 0.403237 0.462154 -> 0.462154 
 270 G M 0.193099 0.418711 0.388190 -> 0.418711 
 271 A E 0.146144 0.299246 0.554610 -> 0.554610 
 272 D E 0.046546 0.186425 0.767029 -> 0.767029 
 273 G E 0.157115 0.378431 0.464454 -> 0.464454 
 274 V M 0.189875 0.408703 0.401422 -> 0.408703 
 275 Y M 0.433482 0.474880 0.091637 -> 0.474880 
 276 R E 0.048234 0.445926 0.505840 -> 0.505840 
 277 G E 0.212459 0.327374 0.460166 -> 0.460166 
 278 L M 0.385105 0.466357 0.148538 -> 0.466357 
 279 G E 0.165241 0.355184 0.479575 -> 0.479575 
 280 N M 0.282409 0.425993 0.291598 -> 0.425993 
 281 R E 0.049162 0.263644 0.687194 -> 0.687194 
 282 E E 0.120708 0.403737 0.475555 -> 0.475555 
 283 P E 0.177240 0.298367 0.524393 -> 0.524393 
 284 A M 0.310250 0.347469 0.342281 -> 0.347469 
 285 V M 0.327834 0.412681 0.259485 -> 0.412681 
 286 T M 0.201090 0.402741 0.396169 -> 0.402741 
 287 D E 0.098489 0.398728 0.502783 -> 0.502783 
 288 D E 0.144207 0.345434 0.510359 -> 0.510359 
 289 K E 0.039503 0.280212 0.680285 -> 0.680285 
 290 D E 0.089841 0.274202 0.635956 -> 0.635956 
 291 N E 0.177645 0.400070 0.422284 -> 0.422284 
 292 M B 0.396736 0.383417 0.219847 -> 0.396736 
 293 L B 0.413358 0.365510 0.221132 -> 0.413358 
 294 S M 0.310991 0.347392 0.341618 -> 0.347392 
 295 S E 0.245028 0.323026 0.431946 -> 0.431946 
 296 V M 0.350594 0.383922 0.265483 -> 0.383922 
 297 V B 0.560560 0.326372 0.113068 -> 0.560560 
 298 S E 0.258027 0.353238 0.388735 -> 0.388735 
 299 S E 0.245564 0.349024 0.405412 -> 0.405412 
 300 Y M 0.204500 0.461855 0.333645 -> 0.461855 
 301 L B 0.439123 0.411836 0.149041 -> 0.439123 
 302 F M 0.329245 0.443403 0.227352 -> 0.443403 
 303 R M 0.071854 0.498642 0.429504 -> 0.498642 
 304 K E 0.040529 0.319828 0.639643 -> 0.639643 
 305 D E 0.103756 0.347637 0.548607 -> 0.548607 
 306 A B 0.660578 0.300627 0.038795 -> 0.660578 
 307 P M 0.422681 0.437961 0.139358 -> 0.437961 
 308 E B 0.754413 0.218827 0.026761 -> 0.754413 
 309 L B 0.752864 0.221357 0.025779 -> 0.752864 
 310 I B 0.946804 0.050666 0.002530 -> 0.946804 
 311 Y B 0.892894 0.103439 0.003666 -> 0.892894 
 312 S B 0.954126 0.042573 0.003301 -> 0.954126 
 313 C B 0.955588 0.040666 0.003746 -> 0.955588 
 314 Q B 0.904649 0.089909 0.005442 -> 0.904649 
 315 E B 0.966854 0.031562 0.001584 -> 0.966854 
 316 Q B 0.974939 0.023133 0.001928 -> 0.974939 
 317 L B 0.945673 0.053510 0.000817 -> 0.945673 
 318 L B 0.989141 0.010652 0.000207 -> 0.989141 
 319 L B 0.985755 0.012237 0.002007 -> 0.985755 
 320 E B 0.915877 0.083009 0.001114 -> 0.915877 
 321 A B 0.992885 0.006406 0.000709 -> 0.992885 
 322 E B 0.932474 0.064721 0.002805 -> 0.932474 
 323 A B 0.975114 0.022245 0.002642 -> 0.975114 
 324 Y M 0.142915 0.822044 0.035041 -> 0.822044 
 325 A B 0.853436 0.131596 0.014968 -> 0.853436 
 326 R M 0.108451 0.651854 0.239696 -> 0.651854 
 327 G E 0.072437 0.277455 0.650108 -> 0.650108 
 328 L M 0.243473 0.520385 0.236141 -> 0.520385 
 329 G E 0.038296 0.171811 0.789894 -> 0.789894 
 330 V E 0.173054 0.352860 0.474086 -> 0.474086 
 331 A E 0.161370 0.213555 0.625075 -> 0.625075 
 332 Q E 0.013966 0.116490 0.869544 -> 0.869544 
 333 N M 0.231363 0.439272 0.329365 -> 0.439272 
 334 L M 0.211080 0.667817 0.121103 -> 0.667817 
 335 S E 0.022335 0.148694 0.828971 -> 0.828971 
 336 K M 0.033730 0.533982 0.432287 -> 0.533982 
 337 A B 0.982943 0.012248 0.004810 -> 0.982943 
 338 N M 0.195079 0.689090 0.115831 -> 0.689090 
 339 E E 0.007724 0.227244 0.765032 -> 0.765032 
 340 L B 0.618381 0.363902 0.017717 -> 0.618381 
 341 Y B 0.709002 0.274377 0.016621 -> 0.709002 
 342 K M 0.038584 0.506871 0.454544 -> 0.506871 
 343 K E 0.008845 0.248114 0.743041 -> 0.743041 
 344 G B 0.745369 0.227043 0.027588 -> 0.745369 
 345 I B 0.732426 0.243832 0.023742 -> 0.732426 
 346 R E 0.009734 0.279628 0.710637 -> 0.710637 
 347 E E 0.057731 0.416008 0.526261 -> 0.526261 
 348 A B 0.805742 0.182370 0.011888 -> 0.805742 
 349 C B 0.547441 0.431500 0.021059 -> 0.547441 
 350 A E 0.027771 0.105618 0.866611 -> 0.866611 
 351 F M 0.144045 0.513359 0.342596 -> 0.513359 
 352 Y M 0.200830 0.545058 0.254112 -> 0.545058 
 353 G E 0.057398 0.184644 0.757957 -> 0.757957 
 354 V B 0.529384 0.408025 0.062592 -> 0.529384 
 355 A E 0.151722 0.277235 0.571044 -> 0.571044 
 356 E E 0.044980 0.302383 0.652637 -> 0.652637 
 357 A E 0.245025 0.316747 0.438228 -> 0.438228 
 358 D E 0.067637 0.387533 0.544830 -> 0.544830 
 359 I B 0.572567 0.346377 0.081056 -> 0.572567 
 360 D E 0.119039 0.384504 0.496457 -> 0.496457 
 361 T E 0.175877 0.364709 0.459414 -> 0.459414 
 362 Y M 0.451585 0.462689 0.085726 -> 0.462689 
 363 V B 0.516736 0.351201 0.132063 -> 0.516736 
 364 T E 0.131979 0.215329 0.652692 -> 0.652692 
 365 G E 0.080894 0.262730 0.656376 -> 0.656376 
 366 L B 0.468200 0.430360 0.101440 -> 0.468200 
 367 P E 0.121923 0.313102 0.564975 -> 0.564975 
 368 E E 0.032108 0.182625 0.785267 -> 0.785267 
 369 L M 0.382913 0.476708 0.140379 -> 0.476708 
 370 T E 0.086632 0.302030 0.611339 -> 0.611339 
 371 A E 0.153846 0.212116 0.634038 -> 0.634038 
 372 L M 0.385013 0.426445 0.188542 -> 0.426445 
 373 T M 0.322711 0.438636 0.238653 -> 0.438636 
 374 Q M 0.110718 0.532744 0.356538 -> 0.532744 
 375 E E 0.016679 0.134278 0.849043 -> 0.849043 
 376 K E 0.014913 0.294522 0.690564 -> 0.690564 
 377 A B 0.849474 0.123225 0.027301 -> 0.849474 
 378 L B 0.496132 0.474036 0.029832 -> 0.496132 
 379 Y E 0.039976 0.434433 0.525591 -> 0.525591 
 380 E M 0.463415 0.488993 0.047592 -> 0.488993 
 381 I B 0.981768 0.014441 0.003791 -> 0.981768 
 382 H B 0.626072 0.354500 0.019428 -> 0.626072 
 383 M M 0.474222 0.484217 0.041561 -> 0.484217 
 384 Q B 0.854282 0.113034 0.032683 -> 0.854282 
 385 Q B 0.810737 0.174168 0.015095 -> 0.810737 
 386 W B 0.674288 0.308103 0.017609 -> 0.674288 
 387 I B 0.711281 0.253798 0.034921 -> 0.711281 
 388 D B 0.806021 0.141616 0.052363 -> 0.806021 
 389 L B 0.855149 0.133771 0.011080 -> 0.855149 
 390 M B 0.844327 0.141187 0.014485 -> 0.844327 
 391 D B 0.650784 0.222482 0.126734 -> 0.650784 
 392 R M 0.413289 0.484825 0.101887 -> 0.484825 
 393 P B 0.656374 0.248076 0.095549 -> 0.656374 
 394 F B 0.619240 0.352682 0.028078 -> 0.619240 
 395 E M 0.246394 0.641102 0.112503 -> 0.641102 
 396 E B 0.837843 0.147551 0.014606 -> 0.837843 
 397 F B 0.912270 0.077691 0.010038 -> 0.912270 
 398 V B 0.910491 0.074594 0.014915 -> 0.910491 
 399 Q B 0.903888 0.077968 0.018144 -> 0.903888 
 400 W B 0.921865 0.069501 0.008634 -> 0.921865 
 401 R B 0.562031 0.384849 0.053120 -> 0.562031 
 402 R B 0.919929 0.045464 0.034607 -> 0.919929 
 403 S B 0.659269 0.273049 0.067682 -> 0.659269 
 404 G M 0.278570 0.476903 0.244527 -> 0.476903 
 405 T M 0.131122 0.563796 0.305082 -> 0.563796 
 406 A E 0.352222 0.275758 0.372020 -> 0.372020 
 407 G E 0.094722 0.283405 0.621874 -> 0.621874 
 408 N E 0.084873 0.313791 0.601336 -> 0.601336 
 409 E E 0.028631 0.320315 0.651054 -> 0.651054 
 410 V M 0.401944 0.451382 0.146674 -> 0.451382 
 411 P E 0.154042 0.407699 0.438259 -> 0.438259 
 412 T E 0.093334 0.285238 0.621428 -> 0.621428 
 413 L M 0.365974 0.461513 0.172513 -> 0.461513 
 414 Q E 0.047087 0.266895 0.686018 -> 0.686018 
 415 V M 0.322698 0.510057 0.167244 -> 0.510057 
 416 P E 0.134457 0.368081 0.497462 -> 0.497462 
 417 E E 0.016388 0.126807 0.856805 -> 0.856805 
 418 D E 0.029725 0.170467 0.799808 -> 0.799808 
 419 A E 0.217612 0.385239 0.397148 -> 0.397148 
 420 T E 0.082566 0.329122 0.588311 -> 0.588311 
 421 S E 0.116379 0.346823 0.536798 -> 0.536798 
 422 K E 0.015259 0.198397 0.786345 -> 0.786345 
 423 E E 0.036107 0.321132 0.642761 -> 0.642761 
 424 L B 0.494161 0.439501 0.066338 -> 0.494161 
 425 I M 0.343620 0.540949 0.115431 -> 0.540949 
 426 R M 0.349552 0.563286 0.087161 -> 0.563286 
 427 R M 0.466141 0.478403 0.055455 -> 0.478403 
 428 W B 0.941768 0.051175 0.007058 -> 0.941768 
 429 E M 0.424307 0.474279 0.101414 -> 0.474279 
 430 Y B 0.765970 0.209848 0.024182 -> 0.765970 
 431 S B 0.757229 0.206283 0.036488 -> 0.757229 
 432 P M 0.251129 0.514153 0.234718 -> 0.514153 
 433 E E 0.005957 0.216038 0.778005 -> 0.778005 
 434 E B 0.461659 0.431564 0.106777 -> 0.461659 
 435 M M 0.409316 0.533170 0.057514 -> 0.533170 
 436 T E 0.028811 0.183832 0.787357 -> 0.787357 
 437 A E 0.044731 0.351683 0.603586 -> 0.603586 
 438 N B 0.728973 0.219605 0.051422 -> 0.728973 
 439 I E 0.052350 0.246848 0.700801 -> 0.700801 
 440 N E 0.065105 0.242029 0.692866 -> 0.692866 
 441 A M 0.410966 0.457918 0.131117 -> 0.457918 
 442 P E 0.087652 0.337819 0.574529 -> 0.574529 
 443 K E 0.018846 0.159476 0.821678 -> 0.821678 
 444 E E 0.010226 0.159296 0.830478 -> 0.830478 
 445 S M 0.185382 0.448922 0.365696 -> 0.448922 
 446 P M 0.210463 0.422142 0.367395 -> 0.422142 
 447 K E 0.007506 0.124845 0.867649 -> 0.867649 
 448 I B 0.587927 0.359949 0.052124 -> 0.587927 
 449 W M 0.224856 0.594663 0.180480 -> 0.594663 
 450 E E 0.047452 0.461869 0.490679 -> 0.490679 
 451 K M 0.042732 0.523423 0.433845 -> 0.523423 
 452 L B 0.753285 0.205698 0.041017 -> 0.753285 
 453 W B 0.532053 0.409125 0.058823 -> 0.532053 
 454 F B 0.692001 0.252255 0.055745 -> 0.692001 
 455 D M 0.354845 0.364574 0.280580 -> 0.364574 
 456 L E 0.021410 0.393612 0.584978 -> 0.584978 
