# Supplementary material for: AcconPred: Predicting Solvent Accessibility and Contact Number Simultaneously by a Multitask Learning Framework under the Conditional Neural Fields Model
Source: Biomed Res Int. 2015 Aug 3;2015:678764. doi: 10.1155/2015/678764 (PMC4538422; doi:10.1155/2015/678764)
Supplement: Supplementary file 1 — Training/testing dataset as well as the CASP11 evaluation dataset could be found in the Supplementary Material. The CASP11 evaluation dataset contains all detailed results from SPINE-X, SANN, ACCpro5 and AcconPred. [file 678764.f1.zip › Supplmentary_Files/105_casp11_domain/casp11_domain_AcconPred/T0771-D1.reso]

# AcconPred: three-state solvent accessibility prediction results 
# probabilities are in the order of B (Bury, pACC: 0-10), M (Medium, pACC: 11-40) and E (Exposed, pACC: 41-100), 
# where pACC is the relative solvent accessibility value calculated by DSSP 
# output format: <position> <one letter amino acid> <predicted label> ... <probabilities> ... -> <maximal probability> 

 1 E E 0.001104 0.015053 0.983843 -> 0.983843 
 2 E E 0.005289 0.103314 0.891397 -> 0.891397 
 3 S E 0.010224 0.157002 0.832774 -> 0.832774 
 4 L M 0.147923 0.530399 0.321678 -> 0.530399 
 5 E E 0.007401 0.139881 0.852718 -> 0.852718 
 6 G E 0.094424 0.359198 0.546377 -> 0.546377 
 7 T M 0.219933 0.468420 0.311647 -> 0.468420 
 8 V M 0.411355 0.445317 0.143327 -> 0.445317 
 9 I M 0.408733 0.481335 0.109932 -> 0.481335 
 10 Y M 0.370590 0.558919 0.070491 -> 0.558919 
 11 K E 0.022411 0.304947 0.672642 -> 0.672642 
 12 K E 0.022995 0.258467 0.718538 -> 0.718538 
 13 T M 0.125697 0.499278 0.375025 -> 0.499278 
 14 T M 0.143018 0.569770 0.287212 -> 0.569770 
 15 T M 0.122699 0.542153 0.335148 -> 0.542153 
 16 F B 0.819497 0.170358 0.010144 -> 0.819497 
 17 E E 0.015031 0.298781 0.686187 -> 0.686187 
 18 V M 0.240090 0.496079 0.263831 -> 0.496079 
 19 D E 0.013627 0.174619 0.811754 -> 0.811754 
 20 G E 0.083936 0.205423 0.710641 -> 0.710641 
 21 Y M 0.351185 0.569392 0.079423 -> 0.569392 
 22 T M 0.305494 0.496463 0.198043 -> 0.496463 
 23 Y B 0.515253 0.428437 0.056310 -> 0.515253 
 24 Q M 0.268387 0.461801 0.269813 -> 0.461801 
 25 C B 0.883055 0.104479 0.012466 -> 0.883055 
 26 D M 0.142151 0.522837 0.335012 -> 0.522837 
 27 V B 0.628276 0.301576 0.070148 -> 0.628276 
 28 D M 0.098691 0.546372 0.354936 -> 0.546372 
 29 D E 0.014911 0.098338 0.886751 -> 0.886751 
 30 G E 0.063327 0.251124 0.685549 -> 0.685549 
 31 S M 0.322089 0.481605 0.196307 -> 0.481605 
 32 Q E 0.058626 0.386258 0.555115 -> 0.555115 
 33 F B 0.460270 0.422947 0.116783 -> 0.460270 
 34 V B 0.808867 0.181065 0.010068 -> 0.808867 
 35 T B 0.475730 0.457951 0.066319 -> 0.475730 
 36 L B 0.841926 0.142554 0.015520 -> 0.841926 
 37 Y M 0.351039 0.561509 0.087452 -> 0.561509 
 38 N M 0.354878 0.552549 0.092573 -> 0.552549 
 39 K E 0.013957 0.277225 0.708818 -> 0.708818 
 40 E E 0.003971 0.074816 0.921213 -> 0.921213 
 41 N M 0.104885 0.472525 0.422590 -> 0.472525 
 42 K E 0.042755 0.334225 0.623020 -> 0.623020 
 43 L B 0.522018 0.407760 0.070222 -> 0.522018 
 44 T M 0.143271 0.502011 0.354718 -> 0.502011 
 45 Y M 0.180982 0.612964 0.206054 -> 0.612964 
 46 E M 0.170160 0.532626 0.297214 -> 0.532626 
 47 K E 0.060088 0.407389 0.532523 -> 0.532523 
 48 I B 0.565850 0.330706 0.103444 -> 0.565850 
 49 V B 0.868116 0.113614 0.018270 -> 0.868116 
 50 Y M 0.431730 0.468854 0.099416 -> 0.468854 
 51 V B 0.511924 0.409467 0.078609 -> 0.511924 
 52 I B 0.721730 0.233790 0.044481 -> 0.721730 
 53 E M 0.092843 0.544981 0.362176 -> 0.544981 
 54 Y E 0.121307 0.420636 0.458057 -> 0.458057 
 55 D E 0.102201 0.347754 0.550046 -> 0.550046 
 56 R E 0.024479 0.232133 0.743388 -> 0.743388 
 57 F B 0.463853 0.381476 0.154671 -> 0.463853 
 58 M M 0.195289 0.454750 0.349961 -> 0.454750 
 59 S M 0.179479 0.414092 0.406430 -> 0.414092 
 60 Q E 0.056960 0.251660 0.691381 -> 0.691381 
 61 Q M 0.162485 0.482523 0.354991 -> 0.482523 
 62 A B 0.769933 0.181013 0.049054 -> 0.769933 
 63 D M 0.195128 0.506489 0.298383 -> 0.506489 
 64 F M 0.328988 0.399095 0.271917 -> 0.399095 
 65 I B 0.642196 0.280262 0.077542 -> 0.642196 
 66 V B 0.777185 0.170635 0.052180 -> 0.777185 
 67 D M 0.251872 0.533811 0.214316 -> 0.533811 
 68 Q E 0.042139 0.288461 0.669400 -> 0.669400 
 69 A B 0.497668 0.365160 0.137172 -> 0.497668 
 70 F B 0.765936 0.187695 0.046368 -> 0.765936 
 71 T M 0.176712 0.497956 0.325332 -> 0.497956 
 72 K E 0.008950 0.150872 0.840178 -> 0.840178 
 73 A M 0.243518 0.436291 0.320190 -> 0.436291 
 74 M M 0.329596 0.498081 0.172323 -> 0.498081 
 75 A E 0.162118 0.352308 0.485573 -> 0.485573 
 76 D E 0.006158 0.125533 0.868309 -> 0.868309 
 77 E E 0.023879 0.290688 0.685432 -> 0.685432 
 78 I M 0.323771 0.505957 0.170271 -> 0.505957 
 79 G E 0.043161 0.262701 0.694139 -> 0.694139 
 80 K E 0.005014 0.150244 0.844743 -> 0.844743 
 81 T M 0.392419 0.523610 0.083971 -> 0.523610 
 82 E M 0.106967 0.568688 0.324345 -> 0.568688 
 83 L B 0.924090 0.072035 0.003875 -> 0.924090 
 84 M B 0.566901 0.403432 0.029667 -> 0.566901 
 85 I B 0.937538 0.060891 0.001571 -> 0.937538 
 86 T B 0.788150 0.201008 0.010842 -> 0.788150 
 87 M B 0.907812 0.087967 0.004222 -> 0.907812 
 88 L B 0.635604 0.349084 0.015312 -> 0.635604 
 89 L B 0.672466 0.291111 0.036423 -> 0.672466 
 90 S M 0.456759 0.466734 0.076508 -> 0.466734 
 91 P E 0.091264 0.402038 0.506697 -> 0.506697 
 92 N E 0.006544 0.093255 0.900202 -> 0.900202 
 93 T E 0.084262 0.378707 0.537030 -> 0.537030 
 94 G M 0.288707 0.362444 0.348849 -> 0.362444 
 95 E E 0.048627 0.416299 0.535075 -> 0.535075 
 96 V B 0.547141 0.412148 0.040710 -> 0.547141 
 97 M M 0.148940 0.603271 0.247789 -> 0.603271 
 98 E M 0.142632 0.505852 0.351515 -> 0.505852 
 99 V B 0.725336 0.262948 0.011716 -> 0.725336 
 100 N M 0.163021 0.594248 0.242731 -> 0.594248 
 101 F B 0.833913 0.150661 0.015426 -> 0.833913 
 102 N M 0.105663 0.609548 0.284790 -> 0.609548 
 103 F B 0.740369 0.233042 0.026589 -> 0.740369 
 104 F M 0.172581 0.540746 0.286673 -> 0.540746 
 105 T E 0.045005 0.247687 0.707308 -> 0.707308 
 106 F M 0.310219 0.443001 0.246780 -> 0.443001 
 107 E E 0.086005 0.448968 0.465028 -> 0.465028 
 108 P M 0.323953 0.367133 0.308914 -> 0.367133 
 109 Y M 0.369270 0.518030 0.112700 -> 0.518030 
 110 A B 0.757446 0.198519 0.044035 -> 0.757446 
 111 K E 0.079516 0.376578 0.543906 -> 0.543906 
 112 V B 0.785263 0.188686 0.026051 -> 0.785263 
 113 P M 0.403104 0.438981 0.157915 -> 0.438981 
 114 L B 0.761065 0.206854 0.032081 -> 0.761065 
 115 H M 0.254678 0.574287 0.171034 -> 0.574287 
 116 V B 0.567611 0.301292 0.131098 -> 0.567611 
 117 Y M 0.365298 0.500391 0.134311 -> 0.500391 
 118 R E 0.076932 0.410236 0.512833 -> 0.512833 
 119 E E 0.056237 0.373344 0.570418 -> 0.570418 
 120 I B 0.656266 0.233876 0.109859 -> 0.656266 
 121 E M 0.375346 0.495933 0.128721 -> 0.495933 
 122 V B 0.342967 0.333098 0.323934 -> 0.342967 
 123 K E 0.031621 0.411815 0.556564 -> 0.556564 
 124 L B 0.655797 0.290249 0.053953 -> 0.655797 
 125 K M 0.042777 0.516918 0.440305 -> 0.516918 
 126 E E 0.018450 0.169284 0.812267 -> 0.812267 
 127 Q E 0.014193 0.276374 0.709433 -> 0.709433 
 128 I B 0.679530 0.296827 0.023643 -> 0.679530 
 129 H M 0.051286 0.521019 0.427695 -> 0.521019 
 130 F B 0.605553 0.362828 0.031619 -> 0.605553 
 131 K E 0.011425 0.322498 0.666077 -> 0.666077 
 132 P M 0.280788 0.401916 0.317296 -> 0.401916 
 133 I M 0.171937 0.635159 0.192905 -> 0.635159 
 134 E E 0.011417 0.081189 0.907394 -> 0.907394 
 135 E E 0.009658 0.138160 0.852182 -> 0.852182 
 136 G E 0.153526 0.289740 0.556734 -> 0.556734 
 137 K E 0.029828 0.319540 0.650632 -> 0.650632 
 138 Q E 0.070012 0.460655 0.469333 -> 0.469333 
 139 L B 0.635650 0.335098 0.029252 -> 0.635650 
 140 N B 0.537794 0.404777 0.057429 -> 0.537794 
 141 Y B 0.710276 0.267597 0.022127 -> 0.710276 
 142 I B 0.954612 0.040994 0.004394 -> 0.954612 
 143 M B 0.892695 0.099205 0.008100 -> 0.892695 
 144 L B 0.856812 0.130746 0.012442 -> 0.856812 
 145 A B 0.888523 0.104592 0.006885 -> 0.888523 
 146 W B 0.644159 0.312633 0.043208 -> 0.644159 
 147 M B 0.507457 0.403650 0.088893 -> 0.507457 
 148 Q M 0.121275 0.458895 0.419830 -> 0.458895 
 149 K E 0.015631 0.196691 0.787677 -> 0.787677 
 150 P E 0.042901 0.260781 0.696317 -> 0.696317 
 151 Q E 0.003582 0.033145 0.963273 -> 0.963273 
