# Supplementary material for: AcconPred: Predicting Solvent Accessibility and Contact Number Simultaneously by a Multitask Learning Framework under the Conditional Neural Fields Model
Source: Biomed Res Int. 2015 Aug 3;2015:678764. doi: 10.1155/2015/678764 (PMC4538422; doi:10.1155/2015/678764)
Supplement: Supplementary file 1 — Training/testing dataset as well as the CASP11 evaluation dataset could be found in the Supplementary Material. The CASP11 evaluation dataset contains all detailed results from SPINE-X, SANN, ACCpro5 and AcconPred. [file 678764.f1.zip › Supplmentary_Files/105_casp11_domain/casp11_domain_AcconPred/T0772-D1.reso]

# AcconPred: three-state solvent accessibility prediction results 
# probabilities are in the order of B (Bury, pACC: 0-10), M (Medium, pACC: 11-40) and E (Exposed, pACC: 41-100), 
# where pACC is the relative solvent accessibility value calculated by DSSP 
# output format: <position> <one letter amino acid> <predicted label> ... <probabilities> ... -> <maximal probability> 

 1 V E 0.017591 0.071144 0.911265 -> 0.911265 
 2 T E 0.040794 0.277081 0.682125 -> 0.682125 
 3 P E 0.026680 0.160994 0.812326 -> 0.812326 
 4 G E 0.105376 0.399261 0.495363 -> 0.495363 
 5 T E 0.044386 0.301354 0.654259 -> 0.654259 
 6 D E 0.034544 0.308385 0.657071 -> 0.657071 
 7 L B 0.594029 0.357695 0.048277 -> 0.594029 
 8 K E 0.006739 0.112880 0.880381 -> 0.880381 
 9 G E 0.024554 0.111532 0.863914 -> 0.863914 
 10 G E 0.032226 0.267351 0.700423 -> 0.700423 
 11 G E 0.019452 0.141776 0.838771 -> 0.838771 
 12 F M 0.162285 0.641026 0.196689 -> 0.641026 
 13 T E 0.009218 0.094186 0.896596 -> 0.896596 
 14 A M 0.194092 0.514986 0.290922 -> 0.514986 
 15 P E 0.056599 0.347954 0.595446 -> 0.595446 
 16 S E 0.009133 0.085877 0.904991 -> 0.904991 
 17 D E 0.005891 0.185584 0.808526 -> 0.808526 
 18 A B 0.801333 0.189627 0.009040 -> 0.801333 
 19 I M 0.102758 0.704028 0.193214 -> 0.704028 
 20 V M 0.303226 0.558088 0.138686 -> 0.558088 
 21 L B 0.844242 0.143166 0.012592 -> 0.844242 
 22 F B 0.836199 0.152794 0.011007 -> 0.836199 
 23 D M 0.084336 0.510302 0.405362 -> 0.510302 
 24 G M 0.270398 0.459538 0.270063 -> 0.459538 
 25 K E 0.010473 0.168387 0.821141 -> 0.821141 
 26 D M 0.073813 0.477347 0.448840 -> 0.477347 
 27 L B 0.730000 0.249203 0.020797 -> 0.730000 
 28 S E 0.013440 0.171328 0.815232 -> 0.815232 
 29 A E 0.053985 0.292266 0.653750 -> 0.653750 
 30 W B 0.752677 0.231527 0.015796 -> 0.752677 
 31 E E 0.027360 0.452016 0.520624 -> 0.520624 
 32 S M 0.174323 0.506502 0.319175 -> 0.506502 
 33 V M 0.129265 0.567559 0.303176 -> 0.567559 
 34 K E 0.006500 0.080344 0.913156 -> 0.913156 
 35 G E 0.016938 0.069919 0.913143 -> 0.913143 
 36 G E 0.051398 0.286156 0.662446 -> 0.662446 
 37 A E 0.050662 0.277377 0.671961 -> 0.671961 
 38 A E 0.045806 0.248243 0.705952 -> 0.705952 
 39 E E 0.046936 0.459418 0.493646 -> 0.493646 
 40 W B 0.744286 0.249206 0.006507 -> 0.744286 
 41 D M 0.079276 0.675989 0.244735 -> 0.675989 
 42 V B 0.760566 0.231248 0.008186 -> 0.760566 
 43 H M 0.030277 0.497955 0.471768 -> 0.497955 
 44 D E 0.056481 0.388105 0.555414 -> 0.555414 
 45 G M 0.314019 0.438167 0.247814 -> 0.438167 
 46 V M 0.389920 0.472997 0.137083 -> 0.472997 
 47 F B 0.845656 0.145563 0.008782 -> 0.845656 
 48 T M 0.256555 0.606931 0.136515 -> 0.606931 
 49 V B 0.844216 0.146031 0.009753 -> 0.844216 
 50 N M 0.066528 0.569605 0.363867 -> 0.569605 
 51 K E 0.005512 0.167974 0.826514 -> 0.826514 
 52 K E 0.001807 0.073076 0.925117 -> 0.925117 
 53 K E 0.032083 0.311131 0.656786 -> 0.656786 
 54 G B 0.422714 0.412239 0.165047 -> 0.422714 
 55 D B 0.493630 0.447432 0.058937 -> 0.493630 
 56 I B 0.958295 0.038415 0.003290 -> 0.958295 
 57 Q M 0.361653 0.555136 0.083212 -> 0.555136 
 58 T B 0.718660 0.265091 0.016249 -> 0.718660 
 59 K E 0.005467 0.242235 0.752298 -> 0.752298 
 60 Q E 0.002601 0.152722 0.844678 -> 0.844678 
 61 K E 0.001263 0.099623 0.899114 -> 0.899114 
 62 F B 0.700531 0.295835 0.003634 -> 0.700531 
 63 N E 0.005220 0.137376 0.857405 -> 0.857405 
 64 D M 0.142776 0.749340 0.107884 -> 0.749340 
 65 F B 0.945365 0.047783 0.006852 -> 0.945365 
 66 Q M 0.109928 0.773020 0.117051 -> 0.773020 
 67 M B 0.980170 0.018122 0.001708 -> 0.980170 
 68 H M 0.178608 0.776747 0.044645 -> 0.776747 
 69 I B 0.969173 0.027754 0.003073 -> 0.969173 
 70 E M 0.437106 0.511944 0.050950 -> 0.511944 
 71 W B 0.917533 0.078892 0.003576 -> 0.917533 
 72 Q M 0.319551 0.624083 0.056366 -> 0.624083 
 73 V B 0.932034 0.060875 0.007091 -> 0.932034 
 74 P M 0.079215 0.600915 0.319870 -> 0.600915 
 75 T E 0.031535 0.220696 0.747770 -> 0.747770 
 76 N E 0.029739 0.237407 0.732854 -> 0.732854 
 77 I M 0.237271 0.466286 0.296443 -> 0.466286 
 78 T E 0.177977 0.351943 0.470079 -> 0.470079 
 79 G B 0.416180 0.355870 0.227951 -> 0.416180 
 80 E E 0.032959 0.228875 0.738166 -> 0.738166 
 81 S E 0.260268 0.340354 0.399378 -> 0.399378 
 82 Q E 0.105264 0.379610 0.515126 -> 0.515126 
 83 S E 0.166553 0.333186 0.500261 -> 0.500261 
 84 R E 0.133983 0.420895 0.445122 -> 0.445122 
 85 G B 0.388582 0.339177 0.272241 -> 0.388582 
 86 N E 0.150031 0.422445 0.427524 -> 0.427524 
 87 S B 0.415391 0.370873 0.213736 -> 0.415391 
 88 G B 0.429547 0.308885 0.261568 -> 0.429547 
 89 I B 0.437383 0.386277 0.176340 -> 0.437383 
 90 F B 0.491017 0.395189 0.113795 -> 0.491017 
 91 L B 0.701528 0.248900 0.049572 -> 0.701528 
 92 Q B 0.464148 0.384159 0.151693 -> 0.464148 
 93 G B 0.439068 0.309508 0.251425 -> 0.439068 
 94 M B 0.496811 0.370704 0.132485 -> 0.496811 
 95 Y M 0.412394 0.509173 0.078433 -> 0.509173 
 96 E B 0.475716 0.409485 0.114799 -> 0.475716 
 97 V B 0.953562 0.042760 0.003677 -> 0.953562 
 98 Q B 0.699812 0.273729 0.026460 -> 0.699812 
 99 V B 0.912282 0.082718 0.005000 -> 0.912282 
 100 L B 0.491659 0.440925 0.067416 -> 0.491659 
 101 D B 0.601782 0.343438 0.054780 -> 0.601782 
 102 C M 0.285735 0.416767 0.297499 -> 0.416767 
 103 Y E 0.097585 0.431150 0.471266 -> 0.471266 
 104 N E 0.021783 0.174757 0.803460 -> 0.803460 
 105 N M 0.249517 0.524004 0.226479 -> 0.524004 
 106 P E 0.083639 0.224115 0.692246 -> 0.692246 
 107 T E 0.110059 0.323768 0.566173 -> 0.566173 
 108 Y M 0.227063 0.571370 0.201567 -> 0.571370 
 109 V E 0.093984 0.269161 0.636855 -> 0.636855 
 110 N E 0.046197 0.228338 0.725465 -> 0.725465 
 111 G M 0.403450 0.423152 0.173397 -> 0.423152 
 112 Q M 0.162216 0.541852 0.295932 -> 0.541852 
 113 T B 0.787092 0.182931 0.029977 -> 0.787092 
 114 G B 0.847277 0.136399 0.016324 -> 0.847277 
 115 S B 0.805193 0.168802 0.026005 -> 0.805193 
 116 I B 0.728541 0.245486 0.025973 -> 0.728541 
 117 Y B 0.498976 0.438607 0.062417 -> 0.498976 
 118 K E 0.036281 0.302665 0.661054 -> 0.661054 
 119 Q M 0.141500 0.460073 0.398427 -> 0.460073 
 120 S E 0.105528 0.401041 0.493430 -> 0.493430 
 121 I M 0.126814 0.459639 0.413548 -> 0.459639 
 122 P E 0.164852 0.328577 0.506572 -> 0.506572 
 123 L E 0.095716 0.368280 0.536005 -> 0.536005 
 124 A E 0.098694 0.185912 0.715394 -> 0.715394 
 125 N E 0.016454 0.184595 0.798951 -> 0.798951 
 126 A M 0.243327 0.484525 0.272147 -> 0.484525 
 127 M E 0.211206 0.392773 0.396021 -> 0.396021 
 128 R M 0.065389 0.488080 0.446531 -> 0.488080 
 129 K E 0.007754 0.212269 0.779977 -> 0.779977 
 130 P E 0.017000 0.100544 0.882457 -> 0.882457 
 131 G E 0.023195 0.149054 0.827751 -> 0.827751 
 132 E M 0.085581 0.466658 0.447761 -> 0.466658 
 133 W M 0.402757 0.502107 0.095136 -> 0.502107 
 134 N M 0.366728 0.533255 0.100017 -> 0.533255 
 135 V M 0.223957 0.579144 0.196899 -> 0.579144 
 136 Y B 0.687948 0.290744 0.021308 -> 0.687948 
 137 D M 0.190445 0.680960 0.128595 -> 0.680960 
 138 I B 0.947623 0.047598 0.004779 -> 0.947623 
 139 I M 0.124093 0.690992 0.184914 -> 0.690992 
 140 Y B 0.826660 0.165000 0.008340 -> 0.826660 
 141 T M 0.089317 0.614316 0.296367 -> 0.614316 
 142 A B 0.482412 0.321090 0.196498 -> 0.482412 
 143 P E 0.018439 0.229237 0.752324 -> 0.752324 
 144 T E 0.058695 0.336964 0.604342 -> 0.604342 
 145 F B 0.593221 0.378290 0.028489 -> 0.593221 
 146 K E 0.008933 0.196427 0.794640 -> 0.794640 
 147 E E 0.027742 0.216476 0.755781 -> 0.755781 
 148 D E 0.031799 0.253032 0.715168 -> 0.715168 
 149 G E 0.107395 0.402997 0.489609 -> 0.489609 
 150 S E 0.070043 0.255997 0.673959 -> 0.673959 
 151 Y M 0.146168 0.501330 0.352502 -> 0.501330 
 152 R E 0.104807 0.437334 0.457859 -> 0.457859 
 153 T E 0.073292 0.288796 0.637911 -> 0.637911 
 154 H M 0.183269 0.449844 0.366887 -> 0.449844 
 155 P M 0.365181 0.429008 0.205810 -> 0.429008 
 156 T M 0.154874 0.519174 0.325951 -> 0.519174 
 157 V B 0.934844 0.063394 0.001762 -> 0.934844 
 158 T M 0.276018 0.627701 0.096281 -> 0.627701 
 159 V B 0.830559 0.165164 0.004277 -> 0.830559 
 160 I M 0.295702 0.608968 0.095330 -> 0.608968 
 161 Q B 0.482943 0.426745 0.090312 -> 0.482943 
 162 N M 0.283181 0.473839 0.242979 -> 0.473839 
 163 G E 0.029906 0.151276 0.818818 -> 0.818818 
 164 V E 0.055849 0.412009 0.532141 -> 0.532141 
 165 V E 0.042196 0.371304 0.586500 -> 0.586500 
 166 L B 0.603907 0.347616 0.048477 -> 0.603907 
 167 Q M 0.328720 0.388462 0.282818 -> 0.388462 
 168 N M 0.168634 0.479067 0.352299 -> 0.479067 
 169 H M 0.349513 0.474107 0.176380 -> 0.474107 
 170 T E 0.146890 0.417912 0.435198 -> 0.435198 
 171 T E 0.094967 0.335339 0.569694 -> 0.569694 
 172 I M 0.241296 0.465977 0.292727 -> 0.465977 
 173 L E 0.111225 0.334751 0.554024 -> 0.554024 
 174 G E 0.091171 0.308968 0.599861 -> 0.599861 
 175 T E 0.076673 0.301073 0.622253 -> 0.622253 
 176 T M 0.365583 0.402438 0.231980 -> 0.402438 
 177 E E 0.028827 0.208860 0.762313 -> 0.762313 
 178 W M 0.332332 0.496280 0.171388 -> 0.496280 
 179 I M 0.167239 0.468191 0.364571 -> 0.468191 
 180 G E 0.060045 0.218545 0.721410 -> 0.721410 
 181 F M 0.309331 0.584753 0.105916 -> 0.584753 
 182 P E 0.029723 0.163665 0.806612 -> 0.806612 
 183 Q E 0.026823 0.169020 0.804157 -> 0.804157 
 184 V M 0.331641 0.404020 0.264339 -> 0.404020 
 185 K E 0.012632 0.158580 0.828788 -> 0.828788 
 186 K E 0.008867 0.159566 0.831566 -> 0.831566 
 187 H M 0.231061 0.593032 0.175907 -> 0.593032 
 188 G E 0.050455 0.310318 0.639227 -> 0.639227 
 189 A E 0.040086 0.314126 0.645788 -> 0.645788 
 190 G B 0.690580 0.271374 0.038046 -> 0.690580 
 191 P M 0.298782 0.639877 0.061341 -> 0.639877 
 192 I B 0.987918 0.011313 0.000769 -> 0.987918 
 193 I B 0.928421 0.069740 0.001839 -> 0.928421 
 194 L B 0.991605 0.007959 0.000436 -> 0.991605 
 195 Q B 0.936795 0.058059 0.005146 -> 0.936795 
 196 S B 0.899918 0.094257 0.005825 -> 0.899918 
 197 H B 0.520353 0.393777 0.085869 -> 0.520353 
 198 G M 0.258499 0.454668 0.286834 -> 0.454668 
 199 D M 0.186187 0.588098 0.225715 -> 0.588098 
 200 P E 0.023594 0.198900 0.777506 -> 0.777506 
 201 S E 0.054959 0.236832 0.708209 -> 0.708209 
 202 E B 0.469966 0.418451 0.111583 -> 0.469966 
 203 P M 0.057363 0.550988 0.391650 -> 0.550988 
 204 I B 0.862077 0.132124 0.005799 -> 0.862077 
 205 S M 0.263405 0.644490 0.092104 -> 0.644490 
 206 F B 0.767394 0.215593 0.017013 -> 0.767394 
 207 R M 0.232784 0.609766 0.157450 -> 0.609766 
 208 N M 0.135828 0.595674 0.268498 -> 0.595674 
 209 I B 0.913952 0.080231 0.005818 -> 0.913952 
 210 W M 0.055133 0.712249 0.232618 -> 0.712249 
 211 I B 0.765288 0.228781 0.005931 -> 0.765288 
 212 R E 0.013222 0.478513 0.508265 -> 0.508265 
 213 E E 0.004567 0.112352 0.883081 -> 0.883081 
 214 L E 0.005467 0.247377 0.747156 -> 0.747156 
