# Supplementary material for: AcconPred: Predicting Solvent Accessibility and Contact Number Simultaneously by a Multitask Learning Framework under the Conditional Neural Fields Model
Source: Biomed Res Int. 2015 Aug 3;2015:678764. doi: 10.1155/2015/678764 (PMC4538422; doi:10.1155/2015/678764)
Supplement: Supplementary file 1 — Training/testing dataset as well as the CASP11 evaluation dataset could be found in the Supplementary Material. The CASP11 evaluation dataset contains all detailed results from SPINE-X, SANN, ACCpro5 and AcconPred. [file 678764.f1.zip › Supplmentary_Files/105_casp11_domain/casp11_domain_AcconPred/T0773-D1.reso]

# AcconPred: three-state solvent accessibility prediction results 
# probabilities are in the order of B (Bury, pACC: 0-10), M (Medium, pACC: 11-40) and E (Exposed, pACC: 41-100), 
# where pACC is the relative solvent accessibility value calculated by DSSP 
# output format: <position> <one letter amino acid> <predicted label> ... <probabilities> ... -> <maximal probability> 

 1 M E 0.005558 0.046285 0.948158 -> 0.948158 
 2 V E 0.069806 0.405604 0.524590 -> 0.524590 
 3 D E 0.008565 0.133030 0.858405 -> 0.858405 
 4 L M 0.301704 0.604050 0.094246 -> 0.604050 
 5 K E 0.003689 0.119712 0.876599 -> 0.876599 
 6 I M 0.413430 0.537916 0.048654 -> 0.537916 
 7 D E 0.016155 0.255379 0.728466 -> 0.728466 
 8 V M 0.358441 0.523156 0.118403 -> 0.523156 
 9 S E 0.025319 0.283812 0.690869 -> 0.690869 
 10 D E 0.012953 0.208436 0.778611 -> 0.778611 
 11 D E 0.028452 0.349172 0.622376 -> 0.622376 
 12 E E 0.003521 0.059514 0.936965 -> 0.936965 
 13 E M 0.043560 0.539848 0.416592 -> 0.539848 
 14 A B 0.743869 0.217645 0.038486 -> 0.743869 
 15 E E 0.022905 0.465489 0.511606 -> 0.511606 
 16 K E 0.003304 0.148922 0.847773 -> 0.847773 
 17 I B 0.660614 0.325485 0.013902 -> 0.660614 
 18 I B 0.749674 0.233957 0.016369 -> 0.749674 
 19 R E 0.007966 0.271597 0.720437 -> 0.720437 
 20 E M 0.026051 0.595451 0.378498 -> 0.595451 
 21 I B 0.885884 0.106268 0.007849 -> 0.885884 
 22 R M 0.040633 0.660474 0.298894 -> 0.660474 
 23 E E 0.001564 0.041211 0.957225 -> 0.957225 
 24 Q E 0.007513 0.209463 0.783024 -> 0.783024 
 25 W B 0.545862 0.438539 0.015599 -> 0.545862 
 26 P E 0.023058 0.194692 0.782251 -> 0.782251 
 27 K E 0.001831 0.078894 0.919275 -> 0.919275 
 28 A M 0.354849 0.440622 0.204529 -> 0.440622 
 29 T E 0.036645 0.334341 0.629014 -> 0.629014 
 30 V M 0.468990 0.470691 0.060319 -> 0.470691 
 31 T E 0.054737 0.365150 0.580113 -> 0.580113 
 32 R E 0.052710 0.467906 0.479384 -> 0.479384 
 33 T E 0.073445 0.348480 0.578074 -> 0.578074 
 34 N E 0.020464 0.183610 0.795927 -> 0.795927 
 35 G E 0.108486 0.348430 0.543085 -> 0.543085 
 36 D E 0.020356 0.204822 0.774821 -> 0.774821 
 37 I B 0.519810 0.441201 0.038989 -> 0.519810 
 38 K E 0.004905 0.148864 0.846230 -> 0.846230 
 39 L M 0.359394 0.540859 0.099747 -> 0.540859 
 40 D E 0.025966 0.293073 0.680961 -> 0.680961 
 41 A E 0.089906 0.316287 0.593807 -> 0.593807 
 42 Q E 0.012865 0.173947 0.813188 -> 0.813188 
 43 T M 0.129944 0.519603 0.350454 -> 0.519603 
 44 E E 0.028319 0.279153 0.692528 -> 0.692528 
 45 K E 0.003310 0.059417 0.937273 -> 0.937273 
 46 E M 0.109644 0.587289 0.303067 -> 0.587289 
 47 A B 0.521461 0.357741 0.120798 -> 0.521461 
 48 E E 0.005975 0.148438 0.845586 -> 0.845586 
 49 K E 0.008441 0.227744 0.763814 -> 0.763814 
 50 M B 0.524741 0.434297 0.040963 -> 0.524741 
 51 E M 0.042379 0.496075 0.461546 -> 0.496075 
 52 K E 0.004275 0.124248 0.871477 -> 0.871477 
 53 A B 0.562210 0.385554 0.052236 -> 0.562210 
 54 V B 0.617939 0.353123 0.028938 -> 0.617939 
 55 K E 0.001793 0.088075 0.910132 -> 0.910132 
 56 K E 0.002424 0.093563 0.904013 -> 0.904013 
 57 V B 0.533102 0.420063 0.046835 -> 0.533102 
 58 K E 0.008470 0.308395 0.683135 -> 0.683135 
 59 P E 0.020459 0.129927 0.849614 -> 0.849614 
 60 N E 0.006492 0.124754 0.868755 -> 0.868755 
 61 A M 0.223674 0.546259 0.230067 -> 0.546259 
 62 T E 0.028558 0.223034 0.748408 -> 0.748408 
 63 I M 0.246713 0.446357 0.306930 -> 0.446357 
 64 R E 0.022209 0.250649 0.727142 -> 0.727142 
 65 K E 0.006903 0.131537 0.861560 -> 0.861560 
 66 T E 0.012580 0.142222 0.845198 -> 0.845198 
 67 G E 0.008612 0.047669 0.943719 -> 0.943719 
