# Supplementary material for: AcconPred: Predicting Solvent Accessibility and Contact Number Simultaneously by a Multitask Learning Framework under the Conditional Neural Fields Model
Source: Biomed Res Int. 2015 Aug 3;2015:678764. doi: 10.1155/2015/678764 (PMC4538422; doi:10.1155/2015/678764)
Supplement: Supplementary file 1 — Training/testing dataset as well as the CASP11 evaluation dataset could be found in the Supplementary Material. The CASP11 evaluation dataset contains all detailed results from SPINE-X, SANN, ACCpro5 and AcconPred. [file 678764.f1.zip › Supplmentary_Files/105_casp11_domain/casp11_domain_AcconPred/T0774-D1.reso]

# AcconPred: three-state solvent accessibility prediction results 
# probabilities are in the order of B (Bury, pACC: 0-10), M (Medium, pACC: 11-40) and E (Exposed, pACC: 41-100), 
# where pACC is the relative solvent accessibility value calculated by DSSP 
# output format: <position> <one letter amino acid> <predicted label> ... <probabilities> ... -> <maximal probability> 

 1 N E 0.006542 0.040482 0.952976 -> 0.952976 
 2 R E 0.011673 0.185365 0.802963 -> 0.802963 
 3 T E 0.028727 0.271784 0.699490 -> 0.699490 
 4 I B 0.604963 0.354459 0.040578 -> 0.604963 
 5 G M 0.207638 0.447745 0.344617 -> 0.447745 
 6 L B 0.860283 0.130993 0.008724 -> 0.860283 
 7 D M 0.193497 0.671681 0.134822 -> 0.671681 
 8 V B 0.639407 0.326208 0.034386 -> 0.639407 
 9 Y M 0.211034 0.639265 0.149702 -> 0.639265 
 10 T B 0.521931 0.367754 0.110315 -> 0.521931 
 11 E E 0.018226 0.256023 0.725751 -> 0.725751 
 12 V M 0.157691 0.591138 0.251170 -> 0.591138 
 13 E M 0.088217 0.502341 0.409442 -> 0.502341 
 14 T B 0.791347 0.183022 0.025632 -> 0.791347 
 15 T M 0.304151 0.476264 0.219586 -> 0.476264 
 16 T B 0.636233 0.237485 0.126283 -> 0.636233 
 17 S B 0.518205 0.373432 0.108363 -> 0.518205 
 18 T E 0.061255 0.279016 0.659729 -> 0.659729 
 19 L B 0.605405 0.366937 0.027658 -> 0.605405 
 20 K E 0.005253 0.156320 0.838427 -> 0.838427 
 21 A M 0.193722 0.412193 0.394085 -> 0.412193 
 22 N E 0.113433 0.369297 0.517270 -> 0.517270 
 23 A E 0.116867 0.380042 0.503092 -> 0.503092 
 24 G M 0.276106 0.410225 0.313669 -> 0.410225 
 25 F B 0.783969 0.198665 0.017366 -> 0.783969 
 26 G B 0.654435 0.302598 0.042967 -> 0.654435 
 27 I B 0.969706 0.029215 0.001079 -> 0.969706 
 28 F B 0.794641 0.197752 0.007607 -> 0.794641 
 29 A B 0.986056 0.013265 0.000679 -> 0.986056 
 30 Y B 0.727970 0.261362 0.010668 -> 0.727970 
 31 Q B 0.706065 0.273354 0.020581 -> 0.706065 
 32 T B 0.578871 0.339561 0.081567 -> 0.578871 
 33 S M 0.267578 0.400251 0.332171 -> 0.400251 
 34 S M 0.332020 0.369988 0.297992 -> 0.369988 
 35 A E 0.125512 0.300346 0.574142 -> 0.574142 
 36 G E 0.271643 0.344901 0.383456 -> 0.383456 
 37 W M 0.259349 0.498051 0.242600 -> 0.498051 
 38 N E 0.158649 0.372359 0.468992 -> 0.468992 
 39 S M 0.322616 0.457617 0.219767 -> 0.457617 
 40 E E 0.045283 0.314186 0.640531 -> 0.640531 
 41 K E 0.018447 0.179901 0.801652 -> 0.801652 
 42 G E 0.129737 0.350557 0.519706 -> 0.519706 
 43 N E 0.070229 0.267132 0.662639 -> 0.662639 
 44 T E 0.157491 0.411143 0.431366 -> 0.431366 
 45 T M 0.202037 0.504197 0.293766 -> 0.504197 
 46 P E 0.209241 0.339310 0.451449 -> 0.451449 
 47 N M 0.324704 0.488702 0.186594 -> 0.488702 
 48 F B 0.832682 0.144383 0.022935 -> 0.832682 
 49 M B 0.694931 0.227984 0.077086 -> 0.694931 
 50 Y M 0.356032 0.553273 0.090695 -> 0.553273 
 51 N B 0.454895 0.357780 0.187325 -> 0.454895 
 52 E M 0.242911 0.595502 0.161588 -> 0.595502 
 53 H E 0.034080 0.378091 0.587828 -> 0.587828 
 54 A B 0.699921 0.286339 0.013740 -> 0.699921 
 55 T E 0.042090 0.415235 0.542675 -> 0.542675 
 56 W M 0.219069 0.626306 0.154625 -> 0.626306 
 57 T E 0.018810 0.280267 0.700923 -> 0.700923 
 58 S E 0.019547 0.128572 0.851881 -> 0.851881 
 59 D E 0.010424 0.161680 0.827896 -> 0.827896 
 60 S E 0.054838 0.255191 0.689971 -> 0.689971 
 61 W M 0.355659 0.526420 0.117921 -> 0.526420 
 62 G M 0.211790 0.425551 0.362659 -> 0.425551 
 63 Y M 0.138913 0.578267 0.282820 -> 0.578267 
 64 T E 0.120729 0.379319 0.499951 -> 0.499951 
 65 N E 0.035573 0.341017 0.623410 -> 0.623410 
 66 L M 0.247643 0.516646 0.235711 -> 0.516646 
 67 R M 0.162595 0.716246 0.121159 -> 0.716246 
 68 F B 0.610289 0.346934 0.042777 -> 0.610289 
 69 W B 0.832942 0.140574 0.026484 -> 0.832942 
 70 P M 0.376669 0.403998 0.219333 -> 0.403998 
 71 I M 0.136257 0.515594 0.348149 -> 0.515594 
 72 D E 0.006134 0.093281 0.900585 -> 0.900585 
 73 D E 0.009517 0.215589 0.774894 -> 0.774894 
 74 K E 0.005677 0.147535 0.846788 -> 0.846788 
 75 K E 0.011924 0.420598 0.567478 -> 0.567478 
 76 I B 0.932622 0.066267 0.001112 -> 0.932622 
 77 T M 0.259851 0.688768 0.051381 -> 0.688768 
 78 F B 0.963189 0.035706 0.001105 -> 0.963189 
 79 F B 0.889589 0.107968 0.002442 -> 0.889589 
 80 A B 0.977020 0.022416 0.000564 -> 0.977020 
 81 Y B 0.684163 0.305670 0.010167 -> 0.684163 
 82 A B 0.932799 0.059418 0.007783 -> 0.932799 
 83 P B 0.704471 0.264918 0.030611 -> 0.704471 
 84 Y M 0.303684 0.590483 0.105833 -> 0.590483 
 85 E E 0.077944 0.399086 0.522970 -> 0.522970 
 86 S M 0.306947 0.415132 0.277921 -> 0.415132 
 87 K E 0.008547 0.143173 0.848280 -> 0.848280 
 88 P E 0.041431 0.305964 0.652605 -> 0.652605 
 89 E E 0.021902 0.186609 0.791489 -> 0.791489 
 90 V E 0.081598 0.377295 0.541108 -> 0.541108 
 91 G E 0.072390 0.260201 0.667409 -> 0.667409 
 92 T E 0.142700 0.390823 0.466476 -> 0.466476 
 93 D E 0.030956 0.262245 0.706799 -> 0.706799 
 94 Q M 0.126994 0.477093 0.395914 -> 0.477093 
 95 K E 0.048634 0.364516 0.586850 -> 0.586850 
 96 I B 0.692909 0.289584 0.017508 -> 0.692909 
 97 T B 0.571110 0.337881 0.091009 -> 0.571110 
 98 L B 0.683626 0.267601 0.048772 -> 0.683626 
 99 S B 0.631043 0.288914 0.080043 -> 0.631043 
 100 G M 0.180457 0.411350 0.408192 -> 0.411350 
 101 Q E 0.099218 0.314947 0.585835 -> 0.585835 
 102 N E 0.190186 0.390008 0.419805 -> 0.419805 
 103 A E 0.137571 0.347191 0.515238 -> 0.515238 
 104 K E 0.013203 0.124349 0.862448 -> 0.862448 
 105 G E 0.148297 0.308294 0.543408 -> 0.543408 
 106 A M 0.264114 0.538435 0.197452 -> 0.538435 
 107 P B 0.593157 0.340964 0.065879 -> 0.593157 
 108 T M 0.190093 0.582528 0.227379 -> 0.582528 
 109 I B 0.930155 0.068048 0.001797 -> 0.930155 
 110 T M 0.077822 0.607889 0.314289 -> 0.607889 
 111 F B 0.869171 0.127472 0.003357 -> 0.869171 
 112 E M 0.045707 0.577730 0.376562 -> 0.577730 
 113 V B 0.818589 0.176443 0.004968 -> 0.818589 
 114 K E 0.006663 0.230234 0.763103 -> 0.763103 
 115 T B 0.498486 0.423261 0.078252 -> 0.498486 
 116 S M 0.075390 0.467494 0.457116 -> 0.467494 
 117 N E 0.060077 0.327352 0.612572 -> 0.612572 
 118 N E 0.026656 0.352803 0.620541 -> 0.620541 
 119 W B 0.514907 0.441478 0.043615 -> 0.514907 
 120 K E 0.009214 0.155636 0.835150 -> 0.835150 
 121 D E 0.019210 0.352065 0.628725 -> 0.628725 
 122 M B 0.746878 0.237486 0.015636 -> 0.746878 
 123 I M 0.279722 0.672148 0.048129 -> 0.672148 
 124 D B 0.834882 0.157006 0.008112 -> 0.834882 
 125 L B 0.936278 0.061888 0.001835 -> 0.936278 
 126 V B 0.980105 0.017622 0.002273 -> 0.980105 
 127 T B 0.923627 0.071770 0.004604 -> 0.923627 
 128 D B 0.919802 0.074127 0.006071 -> 0.919802 
 129 C B 0.551328 0.401472 0.047200 -> 0.551328 
 130 H M 0.204201 0.550906 0.244892 -> 0.550906 
 131 T M 0.196785 0.474510 0.328705 -> 0.474510 
 132 A E 0.199658 0.333885 0.466457 -> 0.466457 
 133 I M 0.436681 0.441312 0.122008 -> 0.441312 
 134 Q E 0.053053 0.332775 0.614172 -> 0.614172 
 135 D M 0.077230 0.466962 0.455808 -> 0.466962 
 136 Q E 0.027831 0.257345 0.714824 -> 0.714824 
 137 T M 0.196917 0.465082 0.338001 -> 0.465082 
 138 N E 0.033498 0.265986 0.700516 -> 0.700516 
 139 E E 0.021466 0.219425 0.759109 -> 0.759109 
 140 S E 0.045003 0.271133 0.683863 -> 0.683863 
 141 N E 0.054974 0.288475 0.656550 -> 0.656550 
 142 K E 0.006092 0.149008 0.844900 -> 0.844900 
 143 G M 0.175749 0.413381 0.410869 -> 0.413381 
 144 T E 0.030658 0.418104 0.551238 -> 0.551238 
 145 V B 0.771797 0.223344 0.004858 -> 0.771797 
 146 Q E 0.008877 0.305339 0.685784 -> 0.685784 
 147 F B 0.910691 0.087064 0.002245 -> 0.910691 
 148 K M 0.014152 0.567161 0.418687 -> 0.567161 
 149 F B 0.923562 0.070625 0.005813 -> 0.923562 
 150 S M 0.243853 0.684097 0.072050 -> 0.684097 
 151 H B 0.694245 0.274733 0.031021 -> 0.694245 
 152 V B 0.743848 0.220125 0.036026 -> 0.743848 
 153 L B 0.958268 0.036600 0.005132 -> 0.958268 
 154 T B 0.903307 0.074533 0.022160 -> 0.903307 
 155 Q B 0.723710 0.252258 0.024032 -> 0.723710 
 156 I B 0.946556 0.049497 0.003946 -> 0.946556 
 157 A M 0.274023 0.630496 0.095481 -> 0.630496 
 158 N B 0.723748 0.239319 0.036933 -> 0.723748 
 159 I M 0.087778 0.646280 0.265942 -> 0.646280 
 160 K M 0.092500 0.508743 0.398757 -> 0.508743 
 161 V M 0.245882 0.503080 0.251037 -> 0.503080 
 162 K E 0.049241 0.359361 0.591398 -> 0.591398 
 163 P E 0.041400 0.210059 0.748541 -> 0.748541 
 164 D E 0.010343 0.111206 0.878451 -> 0.878451 
 165 V E 0.129026 0.321709 0.549265 -> 0.549265 
 166 N E 0.071512 0.303402 0.625086 -> 0.625086 
 167 L E 0.192640 0.387512 0.419848 -> 0.419848 
 168 G M 0.256101 0.445403 0.298495 -> 0.445403 
 169 T E 0.125989 0.390399 0.483612 -> 0.483612 
 170 D M 0.159476 0.449782 0.390742 -> 0.449782 
 171 T M 0.212414 0.583661 0.203925 -> 0.583661 
 172 K M 0.058088 0.493058 0.448854 -> 0.493058 
 173 I B 0.833645 0.153914 0.012441 -> 0.833645 
 174 F M 0.150324 0.552373 0.297302 -> 0.552373 
 175 V B 0.848888 0.142660 0.008452 -> 0.848888 
 176 T M 0.104747 0.609084 0.286169 -> 0.609084 
 177 G M 0.324707 0.364176 0.311117 -> 0.364176 
 178 L B 0.458556 0.438613 0.102831 -> 0.458556 
 179 K E 0.090617 0.423321 0.486062 -> 0.486062 
 180 L B 0.460319 0.399081 0.140599 -> 0.460319 
 181 D E 0.095287 0.400591 0.504122 -> 0.504122 
 182 P E 0.115156 0.265905 0.618939 -> 0.618939 
 183 G E 0.097930 0.294069 0.608001 -> 0.608001 
 184 S E 0.126382 0.373712 0.499906 -> 0.499906 
 185 T M 0.176426 0.416542 0.407032 -> 0.416542 
 186 T M 0.161755 0.437761 0.400483 -> 0.437761 
 187 L B 0.662762 0.278209 0.059029 -> 0.662762 
 188 Y M 0.202617 0.470107 0.327276 -> 0.470107 
 189 N B 0.497861 0.368861 0.133277 -> 0.497861 
 190 K E 0.044749 0.324304 0.630946 -> 0.630946 
 191 A B 0.702125 0.243907 0.053969 -> 0.702125 
 192 V M 0.231855 0.481358 0.286787 -> 0.481358 
 193 Y B 0.542182 0.405515 0.052303 -> 0.542182 
 194 K E 0.038508 0.359816 0.601676 -> 0.601676 
 195 F B 0.528844 0.387435 0.083721 -> 0.528844 
 196 D E 0.045077 0.272145 0.682778 -> 0.682778 
 197 N E 0.039895 0.213533 0.746572 -> 0.746572 
 198 D E 0.122182 0.406655 0.471163 -> 0.471163 
 199 T E 0.162177 0.356687 0.481136 -> 0.481136 
 200 W B 0.529735 0.425440 0.044825 -> 0.529735 
 201 E E 0.034055 0.280123 0.685823 -> 0.685823 
 202 A E 0.188517 0.347516 0.463967 -> 0.463967 
 203 I M 0.255230 0.469105 0.275664 -> 0.469105 
 204 S M 0.262938 0.394940 0.342122 -> 0.394940 
 205 P E 0.097733 0.290876 0.611392 -> 0.611392 
 206 D E 0.019783 0.165265 0.814951 -> 0.814951 
 207 A M 0.293450 0.437264 0.269286 -> 0.437264 
 208 S E 0.182420 0.358941 0.458640 -> 0.458640 
 209 Y M 0.356294 0.526250 0.117456 -> 0.526250 
 210 F B 0.491190 0.388418 0.120392 -> 0.491190 
 211 S B 0.540781 0.343450 0.115769 -> 0.540781 
 212 T B 0.440814 0.382392 0.176795 -> 0.440814 
 213 E E 0.140009 0.389518 0.470473 -> 0.470473 
 214 Q E 0.217574 0.366109 0.416317 -> 0.416317 
 215 D E 0.073887 0.350450 0.575663 -> 0.575663 
 216 L B 0.452560 0.337933 0.209507 -> 0.452560 
 217 S E 0.140718 0.399030 0.460252 -> 0.460252 
 218 D E 0.020495 0.183226 0.796279 -> 0.796279 
 219 F M 0.337070 0.475790 0.187139 -> 0.475790 
 220 L B 0.412300 0.374937 0.212762 -> 0.412300 
 221 N E 0.145412 0.361647 0.492941 -> 0.492941 
 222 K E 0.013044 0.189159 0.797797 -> 0.797797 
 223 T M 0.273851 0.442694 0.283455 -> 0.442694 
 224 T E 0.171078 0.409155 0.419767 -> 0.419767 
 225 T M 0.255669 0.395678 0.348653 -> 0.395678 
 226 D E 0.104725 0.370100 0.525176 -> 0.525176 
 227 Q E 0.082849 0.283782 0.633369 -> 0.633369 
 228 W M 0.262200 0.438054 0.299746 -> 0.438054 
 229 G E 0.124117 0.271781 0.604103 -> 0.604103 
 230 Y M 0.228528 0.528168 0.243305 -> 0.528168 
 231 N E 0.075404 0.273818 0.650778 -> 0.650778 
 232 K E 0.045956 0.282878 0.671166 -> 0.671166 
 233 S E 0.172227 0.376940 0.450833 -> 0.450833 
 234 S E 0.208125 0.380908 0.410968 -> 0.410968 
 235 I B 0.496820 0.394600 0.108580 -> 0.496820 
 236 N E 0.086266 0.348246 0.565488 -> 0.565488 
 237 V M 0.384269 0.470307 0.145424 -> 0.470307 
 238 S E 0.126844 0.421584 0.451572 -> 0.451572 
 239 D E 0.037071 0.203286 0.759644 -> 0.759644 
 240 D E 0.029780 0.223301 0.746919 -> 0.746919 
 241 Q E 0.086744 0.296484 0.616772 -> 0.616772 
 242 N E 0.040242 0.278656 0.681102 -> 0.681102 
 243 A B 0.493000 0.377160 0.129840 -> 0.493000 
 244 T M 0.119410 0.443278 0.437312 -> 0.443278 
 245 A M 0.280783 0.369795 0.349422 -> 0.369795 
 246 L M 0.355372 0.486549 0.158079 -> 0.486549 
 247 F M 0.423359 0.450179 0.126462 -> 0.450179 
 248 S E 0.098713 0.342904 0.558383 -> 0.558383 
 249 D E 0.143360 0.426685 0.429954 -> 0.429954 
 250 T E 0.211852 0.310808 0.477340 -> 0.477340 
 251 E M 0.355934 0.495579 0.148487 -> 0.495579 
 252 A B 0.667581 0.300341 0.032078 -> 0.667581 
 253 L B 0.977189 0.022007 0.000804 -> 0.977189 
 254 Y B 0.812891 0.181706 0.005404 -> 0.812891 
 255 F B 0.981415 0.017597 0.000989 -> 0.981415 
 256 I B 0.976947 0.022189 0.000864 -> 0.976947 
 257 P B 0.876301 0.116903 0.006795 -> 0.876301 
 258 V B 0.921108 0.072176 0.006716 -> 0.921108 
 259 N M 0.311056 0.497348 0.191595 -> 0.497348 
 260 N M 0.341591 0.422647 0.235763 -> 0.422647 
 261 K E 0.039633 0.345029 0.615338 -> 0.615338 
 262 N E 0.033054 0.171131 0.795815 -> 0.795815 
 263 G E 0.092628 0.315028 0.592344 -> 0.592344 
 264 T M 0.225313 0.396957 0.377730 -> 0.396957 
 265 T M 0.205036 0.470338 0.324626 -> 0.470338 
 266 N E 0.163406 0.397024 0.439570 -> 0.439570 
 267 A E 0.097436 0.319074 0.583490 -> 0.583490 
 268 G E 0.035296 0.202270 0.762435 -> 0.762435 
 269 D E 0.057727 0.362934 0.579339 -> 0.579339 
 270 L B 0.728007 0.259441 0.012552 -> 0.728007 
 271 K M 0.036455 0.541579 0.421967 -> 0.541579 
 272 L B 0.941686 0.056741 0.001573 -> 0.941686 
 273 K M 0.041838 0.700957 0.257205 -> 0.700957 
 274 I B 0.985419 0.013475 0.001106 -> 0.985419 
 275 N M 0.254031 0.686458 0.059511 -> 0.686458 
 276 Y B 0.928076 0.069342 0.002583 -> 0.928076 
 277 D M 0.080513 0.623013 0.296474 -> 0.623013 
 278 I B 0.771342 0.215789 0.012869 -> 0.771342 
 279 V M 0.090812 0.542337 0.366851 -> 0.542337 
 280 T M 0.421284 0.451032 0.127683 -> 0.451032 
 281 K E 0.009810 0.191196 0.798993 -> 0.798993 
 282 V M 0.218260 0.455204 0.326536 -> 0.455204 
 283 T E 0.049582 0.335519 0.614899 -> 0.614899 
 284 D E 0.020420 0.151007 0.828573 -> 0.828573 
 285 T E 0.061567 0.336095 0.602338 -> 0.602338 
 286 S E 0.137398 0.316303 0.546299 -> 0.546299 
 287 N E 0.045334 0.315004 0.639662 -> 0.639662 
 288 L B 0.498437 0.439205 0.062359 -> 0.498437 
 289 T E 0.116986 0.382538 0.500476 -> 0.500476 
 290 S M 0.341796 0.454666 0.203537 -> 0.454666 
 291 T E 0.067300 0.298697 0.634003 -> 0.634003 
 292 I M 0.357678 0.486712 0.155609 -> 0.486712 
 293 T E 0.088394 0.385325 0.526281 -> 0.526281 
 294 N E 0.128173 0.427013 0.444815 -> 0.444815 
 295 K E 0.048687 0.448494 0.502820 -> 0.502820 
 296 E E 0.035217 0.287233 0.677550 -> 0.677550 
 297 V B 0.631415 0.324827 0.043758 -> 0.631415 
 298 S M 0.210547 0.413582 0.375871 -> 0.413582 
 299 L B 0.599264 0.343319 0.057416 -> 0.599264 
 300 P M 0.207706 0.423471 0.368823 -> 0.423471 
 301 K E 0.013671 0.169913 0.816416 -> 0.816416 
 302 N E 0.046192 0.276075 0.677732 -> 0.677732 
 303 T E 0.074528 0.428070 0.497401 -> 0.497401 
 304 F B 0.605415 0.360637 0.033949 -> 0.605415 
 305 K E 0.005904 0.217375 0.776721 -> 0.776721 
 306 K E 0.010802 0.127456 0.861741 -> 0.861741 
 307 G E 0.032790 0.181837 0.785373 -> 0.785373 
 308 T M 0.090165 0.598615 0.311220 -> 0.598615 
 309 K E 0.020637 0.360465 0.618898 -> 0.618898 
 310 H M 0.451136 0.512256 0.036608 -> 0.512256 
 311 T M 0.208643 0.638481 0.152876 -> 0.638481 
 312 Y B 0.928181 0.065590 0.006228 -> 0.928181 
 313 V M 0.207339 0.681030 0.111631 -> 0.681030 
 314 L B 0.988612 0.010396 0.000992 -> 0.988612 
 315 T M 0.192427 0.709305 0.098268 -> 0.709305 
 316 I B 0.975626 0.021146 0.003229 -> 0.975626 
 317 K E 0.007490 0.363530 0.628979 -> 0.628979 
 318 M M 0.180180 0.452567 0.367253 -> 0.452567 
 319 N E 0.006119 0.150400 0.843481 -> 0.843481 
 320 A E 0.090274 0.324433 0.585293 -> 0.585293 
 321 I M 0.409720 0.531919 0.058361 -> 0.531919 
 322 K E 0.008361 0.250068 0.741571 -> 0.741571 
 323 I B 0.915877 0.080682 0.003441 -> 0.915877 
 324 T M 0.055286 0.607363 0.337351 -> 0.607363 
 325 V B 0.680313 0.306764 0.012923 -> 0.680313 
 326 E E 0.021276 0.448882 0.529841 -> 0.529841 
 327 D M 0.131607 0.525486 0.342907 -> 0.525486 
 328 N E 0.007911 0.169490 0.822599 -> 0.822599 
 329 M B 0.478234 0.409505 0.112261 -> 0.478234 
 330 E E 0.009963 0.192256 0.797781 -> 0.797781 
 331 G E 0.021244 0.198846 0.779910 -> 0.779910 
 332 W M 0.350585 0.575586 0.073829 -> 0.575586 
 333 T E 0.020502 0.247771 0.731726 -> 0.731726 
