# Supplementary material for: AcconPred: Predicting Solvent Accessibility and Contact Number Simultaneously by a Multitask Learning Framework under the Conditional Neural Fields Model
Source: Biomed Res Int. 2015 Aug 3;2015:678764. doi: 10.1155/2015/678764 (PMC4538422; doi:10.1155/2015/678764)
Supplement: Supplementary file 1 — Training/testing dataset as well as the CASP11 evaluation dataset could be found in the Supplementary Material. The CASP11 evaluation dataset contains all detailed results from SPINE-X, SANN, ACCpro5 and AcconPred. [file 678764.f1.zip › Supplmentary_Files/105_casp11_domain/casp11_domain_AcconPred/T0776-D1.reso]

# AcconPred: three-state solvent accessibility prediction results 
# probabilities are in the order of B (Bury, pACC: 0-10), M (Medium, pACC: 11-40) and E (Exposed, pACC: 41-100), 
# where pACC is the relative solvent accessibility value calculated by DSSP 
# output format: <position> <one letter amino acid> <predicted label> ... <probabilities> ... -> <maximal probability> 

 1 A E 0.003334 0.028917 0.967748 -> 0.967748 
 2 P E 0.016331 0.226186 0.757483 -> 0.757483 
 3 K E 0.005554 0.088975 0.905471 -> 0.905471 
 4 I M 0.144382 0.631879 0.223738 -> 0.631879 
 5 N E 0.017223 0.150362 0.832414 -> 0.832414 
 6 L M 0.216535 0.666475 0.116990 -> 0.666475 
 7 K E 0.002182 0.095924 0.901894 -> 0.901894 
 8 K E 0.005481 0.144056 0.850463 -> 0.850463 
 9 D E 0.003504 0.154257 0.842239 -> 0.842239 
 10 C B 0.578293 0.396326 0.025381 -> 0.578293 
 11 V B 0.512958 0.462850 0.024192 -> 0.512958 
 12 I B 0.993909 0.005859 0.000232 -> 0.993909 
 13 L B 0.996958 0.002782 0.000260 -> 0.996958 
 14 F B 0.999111 0.000783 0.000106 -> 0.999111 
 15 Q B 0.936843 0.062354 0.000803 -> 0.936843 
 16 G B 0.938091 0.061048 0.000861 -> 0.938091 
 17 D B 0.669314 0.311492 0.019194 -> 0.669314 
 18 S B 0.950248 0.043050 0.006702 -> 0.950248 
 19 I B 0.804589 0.186762 0.008649 -> 0.804589 
 20 T B 0.937590 0.052248 0.010162 -> 0.937590 
 21 D B 0.674459 0.276968 0.048574 -> 0.674459 
 22 C B 0.847793 0.142863 0.009344 -> 0.847793 
 23 G B 0.768135 0.202048 0.029817 -> 0.768135 
 24 R M 0.218194 0.607859 0.173947 -> 0.607859 
 25 D B 0.484667 0.365754 0.149579 -> 0.484667 
 26 R E 0.072461 0.429402 0.498137 -> 0.498137 
 27 N E 0.096709 0.323727 0.579564 -> 0.579564 
 28 S M 0.161400 0.448043 0.390556 -> 0.448043 
 29 N E 0.088862 0.264758 0.646381 -> 0.646381 
 30 R E 0.062244 0.384696 0.553060 -> 0.553060 
 31 C B 0.392375 0.387401 0.220223 -> 0.392375 
 32 N M 0.351722 0.371239 0.277039 -> 0.371239 
 33 T M 0.326844 0.417516 0.255640 -> 0.417516 
 34 M M 0.300795 0.424962 0.274242 -> 0.424962 
 35 E E 0.212283 0.372758 0.414959 -> 0.414959 
 36 Q E 0.307792 0.341033 0.351174 -> 0.351174 
 37 F B 0.441706 0.355999 0.202295 -> 0.441706 
 38 G B 0.576931 0.240808 0.182262 -> 0.576931 
 39 S B 0.430493 0.399052 0.170455 -> 0.430493 
 40 G B 0.661231 0.209343 0.129426 -> 0.661231 
 41 Y B 0.786689 0.193988 0.019324 -> 0.786689 
 42 V B 0.814037 0.155476 0.030487 -> 0.814037 
 43 L M 0.309958 0.531579 0.158463 -> 0.531579 
 44 F B 0.612776 0.355037 0.032188 -> 0.612776 
 45 T B 0.980310 0.015995 0.003695 -> 0.980310 
 46 A B 0.744607 0.229749 0.025644 -> 0.744607 
 47 T M 0.134950 0.448451 0.416600 -> 0.448451 
 48 Q M 0.324430 0.608038 0.067533 -> 0.608038 
 49 L B 0.906869 0.079205 0.013926 -> 0.906869 
 50 L M 0.126625 0.587974 0.285401 -> 0.587974 
 51 E E 0.004969 0.069314 0.925717 -> 0.925717 
 52 G E 0.019771 0.171772 0.808457 -> 0.808457 
 53 K E 0.023881 0.341189 0.634930 -> 0.634930 
 54 A E 0.106985 0.291269 0.601746 -> 0.601746 
 55 A E 0.076321 0.179586 0.744092 -> 0.744092 
 56 L M 0.262458 0.608324 0.129218 -> 0.608324 
 57 Q E 0.005702 0.107900 0.886399 -> 0.886399 
 58 P B 0.520552 0.429747 0.049700 -> 0.520552 
 59 K E 0.006826 0.190407 0.802767 -> 0.802767 
 60 I B 0.708602 0.283880 0.007518 -> 0.708602 
 61 Y M 0.252650 0.689447 0.057903 -> 0.689447 
 62 N B 0.864346 0.126181 0.009473 -> 0.864346 
 63 R M 0.402995 0.540995 0.056010 -> 0.540995 
 64 G B 0.874578 0.103190 0.022233 -> 0.874578 
 65 I B 0.573077 0.353810 0.073113 -> 0.573077 
 66 S B 0.420262 0.414999 0.164740 -> 0.420262 
 67 G B 0.654437 0.245669 0.099894 -> 0.654437 
 68 N E 0.091016 0.442644 0.466339 -> 0.466339 
 69 K M 0.048441 0.565287 0.386272 -> 0.565287 
 70 V B 0.954036 0.038846 0.007118 -> 0.954036 
 71 Y M 0.077120 0.582341 0.340539 -> 0.582341 
 72 Q M 0.086797 0.580808 0.332395 -> 0.580808 
 73 L B 0.928530 0.058047 0.013423 -> 0.928530 
 74 R M 0.329189 0.603572 0.067239 -> 0.603572 
 75 E E 0.040086 0.314350 0.645563 -> 0.645563 
 76 R M 0.191345 0.695992 0.112663 -> 0.695992 
 77 W B 0.960423 0.033223 0.006354 -> 0.960423 
 78 E M 0.111658 0.708152 0.180190 -> 0.708152 
 79 I E 0.056304 0.219103 0.724592 -> 0.724592 
 80 D M 0.424681 0.498046 0.077273 -> 0.498046 
 81 C B 0.899205 0.080269 0.020526 -> 0.899205 
 82 L E 0.015724 0.280495 0.703781 -> 0.703781 
 83 A E 0.019881 0.135025 0.845094 -> 0.845094 
 84 F M 0.173550 0.639385 0.187065 -> 0.639385 
 85 Q E 0.028452 0.426838 0.544710 -> 0.544710 
 86 P B 0.823736 0.170840 0.005424 -> 0.823736 
 87 D M 0.159121 0.696813 0.144065 -> 0.696813 
 88 V B 0.958769 0.039591 0.001641 -> 0.958769 
 89 L B 0.988019 0.011634 0.000348 -> 0.988019 
 90 S B 0.982443 0.016265 0.001292 -> 0.982443 
 91 I B 0.996156 0.003669 0.000175 -> 0.996156 
 92 L B 0.868181 0.128103 0.003715 -> 0.868181 
 93 I B 0.950498 0.048410 0.001092 -> 0.950498 
 94 G B 0.939411 0.055302 0.005287 -> 0.939411 
 95 V B 0.882959 0.110906 0.006135 -> 0.882959 
 96 N B 0.841830 0.140745 0.017425 -> 0.841830 
 97 D B 0.831684 0.153474 0.014842 -> 0.831684 
 98 Y B 0.697310 0.254431 0.048259 -> 0.697310 
 99 W M 0.404047 0.456468 0.139484 -> 0.456468 
 100 H M 0.191988 0.554772 0.253240 -> 0.554772 
 101 T M 0.278073 0.421004 0.300923 -> 0.421004 
 102 L M 0.303411 0.450351 0.246238 -> 0.450351 
 103 T E 0.112895 0.304397 0.582708 -> 0.582708 
 104 H E 0.036803 0.198374 0.764823 -> 0.764823 
 105 G E 0.095352 0.255775 0.648873 -> 0.648873 
 106 Y E 0.126905 0.409191 0.463904 -> 0.463904 
 107 K E 0.012241 0.101888 0.885871 -> 0.885871 
 108 G M 0.183219 0.515387 0.301394 -> 0.515387 
 109 T E 0.075419 0.397744 0.526836 -> 0.526836 
 110 V M 0.274370 0.585332 0.140297 -> 0.585332 
 111 E E 0.002856 0.072331 0.924813 -> 0.924813 
 112 T M 0.052464 0.546113 0.401423 -> 0.546113 
 113 Y B 0.933112 0.059034 0.007853 -> 0.933112 
 114 E M 0.131662 0.729913 0.138424 -> 0.729913 
 115 N E 0.011933 0.142035 0.846032 -> 0.846032 
 116 D M 0.343478 0.610267 0.046255 -> 0.610267 
 117 L B 0.985689 0.011981 0.002330 -> 0.985689 
 118 R M 0.029473 0.572194 0.398333 -> 0.572194 
 119 A M 0.114806 0.539747 0.345448 -> 0.539747 
 120 L B 0.964900 0.033589 0.001512 -> 0.964900 
 121 L B 0.917543 0.078478 0.003980 -> 0.917543 
 122 K E 0.003543 0.191282 0.805175 -> 0.805175 
 123 Y M 0.154270 0.799696 0.046034 -> 0.799696 
 124 T B 0.985675 0.012293 0.002033 -> 0.985675 
 125 K M 0.027253 0.670698 0.302049 -> 0.670698 
 126 E E 0.003368 0.047249 0.949383 -> 0.949383 
 127 K E 0.012515 0.295300 0.692185 -> 0.692185 
 128 L M 0.476476 0.506049 0.017475 -> 0.506049 
 129 P E 0.041368 0.178864 0.779769 -> 0.779769 
 130 N E 0.021443 0.224260 0.754297 -> 0.754297 
 131 T B 0.859646 0.136541 0.003813 -> 0.859646 
 132 Q M 0.159500 0.749063 0.091437 -> 0.749063 
 133 I B 0.987651 0.012139 0.000210 -> 0.987651 
 134 V B 0.994511 0.005343 0.000147 -> 0.994511 
 135 L B 0.993031 0.006120 0.000850 -> 0.993031 
 136 C B 0.992595 0.006859 0.000546 -> 0.992595 
 137 E B 0.853040 0.138110 0.008849 -> 0.853040 
 138 P B 0.813220 0.158088 0.028693 -> 0.813220 
 139 F B 0.683566 0.272109 0.044325 -> 0.683566 
 140 T B 0.521660 0.358352 0.119987 -> 0.521660 
 141 L B 0.514829 0.399719 0.085453 -> 0.514829 
 142 R M 0.131913 0.512262 0.355825 -> 0.512262 
 143 D E 0.098950 0.293514 0.607536 -> 0.607536 
 144 G E 0.212709 0.370385 0.416906 -> 0.416906 
 145 A E 0.263785 0.366835 0.369380 -> 0.369380 
 146 A E 0.174775 0.332310 0.492915 -> 0.492915 
 147 I M 0.198247 0.469883 0.331869 -> 0.469883 
 148 E E 0.013989 0.182785 0.803226 -> 0.803226 
 149 D E 0.043413 0.280869 0.675719 -> 0.675719 
 150 S E 0.097631 0.286202 0.616167 -> 0.616167 
 151 K E 0.009715 0.185005 0.805280 -> 0.805280 
 152 W B 0.486843 0.394673 0.118484 -> 0.486843 
 153 Y M 0.131375 0.671139 0.197487 -> 0.671139 
 154 P E 0.010850 0.102483 0.886667 -> 0.886667 
 155 M M 0.243235 0.674920 0.081845 -> 0.674920 
 156 F B 0.868731 0.115793 0.015476 -> 0.868731 
 157 D E 0.043861 0.446540 0.509599 -> 0.509599 
 158 E E 0.023629 0.450454 0.525917 -> 0.525917 
 159 F B 0.942520 0.054330 0.003149 -> 0.942520 
 160 R M 0.192641 0.762752 0.044607 -> 0.762752 
 161 K E 0.001411 0.079936 0.918653 -> 0.918653 
 162 S B 0.629334 0.360625 0.010042 -> 0.629334 
 163 A B 0.992057 0.006789 0.001154 -> 0.992057 
 164 R M 0.009835 0.498173 0.491992 -> 0.498173 
 165 K E 0.003395 0.201299 0.795306 -> 0.795306 
 166 L B 0.882010 0.113059 0.004930 -> 0.882010 
 167 S B 0.910429 0.082820 0.006751 -> 0.910429 
 168 E E 0.003835 0.080264 0.915901 -> 0.915901 
 169 E E 0.000558 0.079617 0.919825 -> 0.919825 
 170 F M 0.305779 0.671302 0.022919 -> 0.671302 
 171 N E 0.020380 0.262709 0.716910 -> 0.716910 
 172 T B 0.868369 0.128798 0.002833 -> 0.868369 
 173 I B 0.492288 0.483023 0.024689 -> 0.492288 
 174 F B 0.740230 0.249269 0.010501 -> 0.740230 
 175 V B 0.960821 0.035747 0.003432 -> 0.960821 
 176 P B 0.637272 0.337324 0.025404 -> 0.637272 
 177 F B 0.834065 0.153424 0.012511 -> 0.834065 
 178 Q M 0.399098 0.524960 0.075941 -> 0.524960 
 179 S M 0.124029 0.465249 0.410722 -> 0.465249 
 180 G B 0.790007 0.181783 0.028210 -> 0.790007 
 181 F B 0.900871 0.088394 0.010735 -> 0.900871 
 182 D M 0.196742 0.589553 0.213705 -> 0.589553 
 183 A M 0.311863 0.409290 0.278847 -> 0.409290 
 184 A B 0.631368 0.297727 0.070906 -> 0.631368 
 185 V B 0.510116 0.392161 0.097723 -> 0.510116 
 186 K E 0.003018 0.042935 0.954047 -> 0.954047 
 187 L E 0.057573 0.254960 0.687467 -> 0.687467 
 188 A M 0.254650 0.499191 0.246159 -> 0.499191 
 189 P E 0.067578 0.356604 0.575818 -> 0.575818 
 190 A E 0.129270 0.332732 0.537998 -> 0.537998 
 191 R E 0.029279 0.308630 0.662091 -> 0.662091 
 192 Y B 0.587636 0.363625 0.048739 -> 0.587636 
 193 W B 0.712450 0.271700 0.015849 -> 0.712450 
 194 S B 0.892845 0.098767 0.008388 -> 0.892845 
 195 N B 0.523256 0.392366 0.084379 -> 0.523256 
 196 D B 0.784970 0.182034 0.032996 -> 0.784970 
 197 G B 0.803525 0.184330 0.012145 -> 0.803525 
 198 V B 0.917043 0.074870 0.008088 -> 0.917043 
 199 H B 0.786924 0.204501 0.008575 -> 0.786924 
 200 P B 0.915710 0.074578 0.009712 -> 0.915710 
 201 D B 0.599258 0.356125 0.044617 -> 0.599258 
 202 L M 0.110067 0.479455 0.410478 -> 0.479455 
 203 P M 0.102852 0.472877 0.424271 -> 0.472877 
 204 G B 0.957581 0.031151 0.011269 -> 0.957581 
 205 R B 0.666363 0.319729 0.013908 -> 0.666363 
 206 Q M 0.094598 0.579480 0.325922 -> 0.579480 
 207 L M 0.419536 0.500927 0.079537 -> 0.500927 
 208 M B 0.991964 0.006986 0.001050 -> 0.991964 
 209 A B 0.986512 0.012559 0.000929 -> 0.986512 
 210 N M 0.132780 0.744440 0.122780 -> 0.744440 
 211 M B 0.595858 0.384684 0.019458 -> 0.595858 
 212 W B 0.979057 0.017753 0.003190 -> 0.979057 
 213 M B 0.721319 0.264908 0.013773 -> 0.721319 
 214 E E 0.007416 0.104772 0.887813 -> 0.887813 
 215 A M 0.255721 0.469885 0.274394 -> 0.469885 
 216 T M 0.322925 0.480466 0.196608 -> 0.480466 
 217 G E 0.030330 0.293953 0.675716 -> 0.675716 
 218 L M 0.235994 0.604101 0.159905 -> 0.604101 
 219 K E 0.014744 0.111539 0.873717 -> 0.873717 
