# Supplementary material for: AcconPred: Predicting Solvent Accessibility and Contact Number Simultaneously by a Multitask Learning Framework under the Conditional Neural Fields Model
Source: Biomed Res Int. 2015 Aug 3;2015:678764. doi: 10.1155/2015/678764 (PMC4538422; doi:10.1155/2015/678764)
Supplement: Supplementary file 1 — Training/testing dataset as well as the CASP11 evaluation dataset could be found in the Supplementary Material. The CASP11 evaluation dataset contains all detailed results from SPINE-X, SANN, ACCpro5 and AcconPred. [file 678764.f1.zip › Supplmentary_Files/105_casp11_domain/casp11_domain_AcconPred/T0777-D1.reso]

# AcconPred: three-state solvent accessibility prediction results 
# probabilities are in the order of B (Bury, pACC: 0-10), M (Medium, pACC: 11-40) and E (Exposed, pACC: 41-100), 
# where pACC is the relative solvent accessibility value calculated by DSSP 
# output format: <position> <one letter amino acid> <predicted label> ... <probabilities> ... -> <maximal probability> 

 1 H E 0.001109 0.014959 0.983931 -> 0.983931 
 2 V E 0.030814 0.293064 0.676122 -> 0.676122 
 3 A E 0.034383 0.171212 0.794405 -> 0.794405 
 4 H E 0.038521 0.279606 0.681873 -> 0.681873 
 5 P E 0.046595 0.259258 0.694147 -> 0.694147 
 6 S E 0.068153 0.213771 0.718076 -> 0.718076 
 7 L M 0.207822 0.458156 0.334021 -> 0.458156 
 8 G E 0.243894 0.346494 0.409612 -> 0.409612 
 9 R E 0.043959 0.339474 0.616567 -> 0.616567 
 10 G E 0.138964 0.342233 0.518802 -> 0.518802 
 11 D E 0.056724 0.266418 0.676858 -> 0.676858 
 12 G E 0.243009 0.367569 0.389422 -> 0.389422 
 13 F M 0.419876 0.457999 0.122126 -> 0.457999 
 14 P B 0.386062 0.372926 0.241012 -> 0.386062 
 15 F M 0.367010 0.395351 0.237639 -> 0.395351 
 16 L B 0.561725 0.315792 0.122483 -> 0.561725 
 17 W B 0.555597 0.378314 0.066089 -> 0.555597 
 18 D E 0.031298 0.313783 0.654919 -> 0.654919 
 19 N E 0.041892 0.337375 0.620733 -> 0.620733 
 20 A B 0.561490 0.315632 0.122878 -> 0.561490 
 21 A M 0.296277 0.423610 0.280114 -> 0.423610 
 22 S E 0.017082 0.122515 0.860404 -> 0.860404 
 23 T M 0.081142 0.496914 0.421943 -> 0.496914 
 24 L B 0.694530 0.278086 0.027384 -> 0.694530 
 25 D E 0.044034 0.332650 0.623316 -> 0.623316 
 26 Q E 0.011399 0.142708 0.845893 -> 0.845893 
 27 L M 0.479233 0.484777 0.035989 -> 0.484777 
 28 N E 0.031566 0.337869 0.630565 -> 0.630565 
 29 G M 0.258523 0.463162 0.278315 -> 0.463162 
 30 T E 0.014557 0.195330 0.790112 -> 0.790112 
 31 D E 0.016839 0.203939 0.779222 -> 0.779222 
 32 T E 0.124140 0.383284 0.492576 -> 0.492576 
 33 T M 0.214493 0.487462 0.298046 -> 0.487462 
 34 I M 0.360767 0.554162 0.085070 -> 0.554162 
 35 I B 0.596346 0.358645 0.045010 -> 0.596346 
 36 L B 0.865068 0.117511 0.017421 -> 0.865068 
 37 N B 0.506780 0.424237 0.068983 -> 0.506780 
 38 G B 0.753257 0.168673 0.078070 -> 0.753257 
 39 F B 0.587208 0.340010 0.072782 -> 0.587208 
 40 N B 0.451481 0.400832 0.147687 -> 0.451481 
 41 Y B 0.509028 0.404843 0.086129 -> 0.509028 
 42 L M 0.129529 0.456358 0.414113 -> 0.456358 
 43 D E 0.081999 0.321794 0.596207 -> 0.596207 
 44 R M 0.260670 0.536996 0.202334 -> 0.536996 
 45 L B 0.467379 0.373702 0.158919 -> 0.467379 
 46 S M 0.213727 0.475001 0.311272 -> 0.475001 
 47 M B 0.734028 0.167873 0.098099 -> 0.734028 
 48 F B 0.722139 0.226579 0.051281 -> 0.722139 
 49 K M 0.077726 0.564020 0.358254 -> 0.564020 
 50 T M 0.315241 0.490036 0.194724 -> 0.490036 
 51 V B 0.763745 0.196723 0.039532 -> 0.763745 
 52 L B 0.594769 0.355202 0.050029 -> 0.594769 
 53 E E 0.030899 0.332159 0.636942 -> 0.636942 
 54 G M 0.221747 0.482412 0.295841 -> 0.482412 
 55 T B 0.634796 0.292006 0.073198 -> 0.634796 
 56 R M 0.047416 0.499648 0.452936 -> 0.499648 
 57 K E 0.005170 0.128305 0.866525 -> 0.866525 
 58 Y M 0.408332 0.535768 0.055899 -> 0.535768 
 59 F B 0.756478 0.224034 0.019489 -> 0.756478 
 60 D E 0.026702 0.249002 0.724296 -> 0.724296 
 61 S E 0.034038 0.268858 0.697103 -> 0.697103 
 62 F B 0.535930 0.382840 0.081230 -> 0.535930 
 63 A B 0.530337 0.388635 0.081028 -> 0.530337 
 64 P E 0.037166 0.126990 0.835845 -> 0.835845 
 65 N E 0.030808 0.213494 0.755698 -> 0.755698 
 66 N M 0.365771 0.444690 0.189539 -> 0.444690 
 67 T E 0.102768 0.346250 0.550982 -> 0.550982 
 68 A E 0.178397 0.336290 0.485313 -> 0.485313 
 69 N M 0.386683 0.468399 0.144917 -> 0.468399 
 70 I B 0.819639 0.147481 0.032879 -> 0.819639 
 71 Y B 0.623511 0.307663 0.068826 -> 0.623511 
 72 W B 0.546146 0.338305 0.115548 -> 0.546146 
 73 G B 0.779583 0.165129 0.055288 -> 0.779583 
 74 F B 0.907566 0.075181 0.017253 -> 0.907566 
 75 T B 0.649498 0.289073 0.061429 -> 0.649498 
 76 I B 0.920226 0.062510 0.017264 -> 0.920226 
 77 Y B 0.632766 0.322933 0.044302 -> 0.632766 
 78 L B 0.704101 0.235024 0.060875 -> 0.704101 
 79 N B 0.490152 0.347613 0.162235 -> 0.490152 
 80 W B 0.709632 0.218008 0.072360 -> 0.709632 
 81 I B 0.623382 0.290009 0.086608 -> 0.623382 
 82 L B 0.425995 0.408877 0.165128 -> 0.425995 
 83 A E 0.234115 0.324333 0.441552 -> 0.441552 
 84 T E 0.273454 0.345270 0.381276 -> 0.381276 
 85 G B 0.402957 0.328478 0.268565 -> 0.402957 
 86 R M 0.198024 0.527784 0.274192 -> 0.527784 
 87 S B 0.539805 0.265489 0.194706 -> 0.539805 
 88 A E 0.236530 0.354066 0.409404 -> 0.409404 
 89 D M 0.130968 0.535003 0.334029 -> 0.535003 
 90 P E 0.206170 0.344011 0.449820 -> 0.449820 
 91 T E 0.028713 0.208864 0.762422 -> 0.762422 
 92 G E 0.027746 0.179321 0.792932 -> 0.792932 
 93 H E 0.036382 0.417780 0.545838 -> 0.545838 
 94 T M 0.273356 0.417097 0.309547 -> 0.417097 
 95 T E 0.062149 0.347694 0.590157 -> 0.590157 
 96 C B 0.464522 0.421778 0.113700 -> 0.464522 
 97 G E 0.309038 0.338586 0.352376 -> 0.352376 
 98 L M 0.233329 0.552675 0.213996 -> 0.552675 
 99 A E 0.070580 0.229815 0.699605 -> 0.699605 
 100 H E 0.052172 0.242578 0.705250 -> 0.705250 
 101 G E 0.083566 0.228908 0.687527 -> 0.687527 
 102 D M 0.230082 0.515576 0.254343 -> 0.515576 
 103 P M 0.245809 0.498700 0.255490 -> 0.498700 
 104 M B 0.570251 0.317229 0.112519 -> 0.570251 
 105 C B 0.652656 0.314836 0.032508 -> 0.652656 
 106 L B 0.867217 0.111595 0.021188 -> 0.867217 
 107 A B 0.648330 0.295055 0.056615 -> 0.648330 
 108 E B 0.423273 0.380454 0.196273 -> 0.423273 
 109 E M 0.228767 0.559615 0.211618 -> 0.559615 
 110 S B 0.890326 0.095372 0.014301 -> 0.890326 
 111 W B 0.864030 0.123657 0.012313 -> 0.864030 
 112 W B 0.771677 0.194014 0.034309 -> 0.771677 
 113 N B 0.777502 0.163610 0.058888 -> 0.777502 
 114 C B 0.756527 0.214900 0.028573 -> 0.756527 
 115 I B 0.893932 0.083128 0.022940 -> 0.893932 
 116 K M 0.375740 0.502809 0.121451 -> 0.502809 
 117 Y B 0.724926 0.250522 0.024552 -> 0.724926 
 118 N B 0.839948 0.148067 0.011985 -> 0.839948 
 119 P B 0.776265 0.182294 0.041442 -> 0.776265 
 120 A B 0.833450 0.140501 0.026049 -> 0.833450 
 121 A B 0.949184 0.043593 0.007224 -> 0.949184 
 122 I B 0.873010 0.109794 0.017196 -> 0.873010 
 123 A B 0.827841 0.159181 0.012978 -> 0.827841 
 124 F B 0.901771 0.091314 0.006915 -> 0.901771 
 125 F B 0.743421 0.231956 0.024623 -> 0.743421 
 126 A B 0.628517 0.321103 0.050380 -> 0.628517 
 127 A B 0.843186 0.137172 0.019642 -> 0.843186 
 128 K E 0.066372 0.461617 0.472011 -> 0.472011 
 129 K E 0.015025 0.197276 0.787700 -> 0.787700 
 130 A M 0.251688 0.485135 0.263177 -> 0.485135 
 131 G E 0.144569 0.278505 0.576926 -> 0.576926 
 132 I B 0.476737 0.397629 0.125634 -> 0.476737 
 133 F B 0.458310 0.366152 0.175538 -> 0.458310 
 134 G E 0.071570 0.275141 0.653289 -> 0.653289 
 135 D E 0.044321 0.263366 0.692312 -> 0.692312 
 136 V M 0.327315 0.485213 0.187472 -> 0.485213 
 137 T E 0.073740 0.309349 0.616912 -> 0.616912 
 138 K E 0.062767 0.452862 0.484371 -> 0.484371 
 139 T M 0.237997 0.459032 0.302972 -> 0.459032 
 140 I B 0.862397 0.131966 0.005637 -> 0.862397 
 141 V M 0.142219 0.657998 0.199783 -> 0.657998 
 142 L B 0.782601 0.180772 0.036627 -> 0.782601 
 143 A B 0.451370 0.429807 0.118823 -> 0.451370 
 144 K E 0.061223 0.406221 0.532556 -> 0.532556 
 145 P M 0.317386 0.466943 0.215671 -> 0.466943 
 146 K E 0.005954 0.080808 0.913238 -> 0.913238 
 147 E E 0.013109 0.137271 0.849620 -> 0.849620 
 148 A E 0.084167 0.340357 0.575476 -> 0.575476 
 149 N E 0.076549 0.342130 0.581321 -> 0.581321 
 150 S M 0.282426 0.520374 0.197200 -> 0.520374 
 151 P E 0.036812 0.337565 0.625624 -> 0.625624 
 152 Y B 0.509469 0.397707 0.092825 -> 0.509469 
 153 C B 0.619549 0.326377 0.054074 -> 0.619549 
 154 S M 0.411327 0.441396 0.147277 -> 0.441396 
 155 S M 0.151195 0.478623 0.370182 -> 0.478623 
 156 E M 0.162279 0.599631 0.238091 -> 0.599631 
 157 E E 0.015508 0.142541 0.841951 -> 0.841951 
 158 E E 0.035269 0.353854 0.610877 -> 0.610877 
 159 C B 0.618876 0.348137 0.032987 -> 0.618876 
 160 Q E 0.031833 0.461251 0.506916 -> 0.506916 
 161 A E 0.013014 0.146983 0.840003 -> 0.840003 
 162 A E 0.045421 0.334550 0.620030 -> 0.620030 
 163 Y B 0.487908 0.436881 0.075211 -> 0.487908 
 164 P E 0.052868 0.358006 0.589126 -> 0.589126 
 165 D E 0.004262 0.106222 0.889516 -> 0.889516 
 166 V B 0.588365 0.387927 0.023708 -> 0.588365 
 167 M B 0.797809 0.167520 0.034671 -> 0.797809 
 168 A E 0.117673 0.394874 0.487453 -> 0.487453 
 169 T M 0.236305 0.588415 0.175280 -> 0.588415 
 170 Y B 0.906035 0.075849 0.018116 -> 0.906035 
 171 L M 0.228946 0.658458 0.112596 -> 0.658458 
 172 D E 0.063957 0.453261 0.482782 -> 0.482782 
 173 Y B 0.850352 0.135157 0.014491 -> 0.850352 
 174 F B 0.840836 0.140738 0.018426 -> 0.840836 
 175 E E 0.045101 0.353594 0.601305 -> 0.601305 
 176 Y M 0.266751 0.624425 0.108824 -> 0.624425 
 177 L B 0.940598 0.050997 0.008405 -> 0.940598 
 178 M M 0.149351 0.649537 0.201112 -> 0.649537 
 179 S E 0.029628 0.302192 0.668180 -> 0.668180 
 180 L M 0.253303 0.583307 0.163390 -> 0.583307 
 181 E E 0.020475 0.257217 0.722308 -> 0.722308 
 182 K E 0.003519 0.082103 0.914378 -> 0.914378 
 183 T E 0.017859 0.211173 0.770969 -> 0.770969 
 184 G E 0.030169 0.287709 0.682122 -> 0.682122 
 185 E E 0.011346 0.149601 0.839053 -> 0.839053 
 186 S E 0.265728 0.315194 0.419078 -> 0.419078 
 187 I M 0.271497 0.545704 0.182800 -> 0.545704 
 188 D E 0.010436 0.215205 0.774358 -> 0.774358 
 189 M M 0.211544 0.686574 0.101882 -> 0.686574 
 190 D E 0.023731 0.283672 0.692597 -> 0.692597 
 191 K E 0.008736 0.292371 0.698893 -> 0.698893 
 192 A B 0.931100 0.048488 0.020412 -> 0.931100 
 193 Q B 0.716958 0.237322 0.045720 -> 0.716958 
 194 Q M 0.122515 0.581399 0.296087 -> 0.581399 
 195 L B 0.483942 0.478414 0.037644 -> 0.483942 
 196 L B 0.913957 0.075637 0.010405 -> 0.913957 
 197 W B 0.797733 0.146410 0.055857 -> 0.797733 
 198 K E 0.024563 0.453559 0.521879 -> 0.521879 
 199 A B 0.808210 0.132469 0.059320 -> 0.808210 
 200 H B 0.800467 0.178789 0.020745 -> 0.800467 
 201 V B 0.495518 0.423836 0.080646 -> 0.495518 
 202 T M 0.167961 0.525452 0.306587 -> 0.525452 
 203 S B 0.781942 0.197735 0.020324 -> 0.781942 
 204 M B 0.868099 0.112866 0.019035 -> 0.868099 
 205 E E 0.021222 0.271111 0.707667 -> 0.707667 
 206 N M 0.097201 0.563727 0.339072 -> 0.563727 
 207 S B 0.938350 0.056437 0.005214 -> 0.938350 
 208 I M 0.313512 0.652948 0.033540 -> 0.652948 
 209 A E 0.009709 0.077044 0.913247 -> 0.913247 
 210 V M 0.158082 0.605412 0.236505 -> 0.605412 
 211 C B 0.924131 0.069201 0.006668 -> 0.924131 
 212 K E 0.007249 0.312709 0.680043 -> 0.680043 
 213 P E 0.020644 0.175945 0.803411 -> 0.803411 
 214 R M 0.119723 0.644015 0.236262 -> 0.644015 
 215 L B 0.544722 0.409076 0.046202 -> 0.544722 
 216 K E 0.007102 0.099694 0.893205 -> 0.893205 
 217 N E 0.182089 0.405134 0.412777 -> 0.412777 
 218 Y M 0.393322 0.474220 0.132458 -> 0.474220 
 219 N E 0.117059 0.410443 0.472497 -> 0.472497 
 220 I E 0.032758 0.254477 0.712765 -> 0.712765 
 221 I M 0.162699 0.444580 0.392722 -> 0.444580 
 222 E M 0.304807 0.493368 0.201825 -> 0.493368 
 223 R E 0.015257 0.186669 0.798073 -> 0.798073 
 224 Q E 0.049184 0.367242 0.583574 -> 0.583574 
 225 L B 0.696835 0.262504 0.040661 -> 0.696835 
 226 D M 0.125386 0.466933 0.407680 -> 0.466933 
 227 R M 0.107425 0.546736 0.345839 -> 0.546736 
 228 D M 0.302617 0.465659 0.231724 -> 0.465659 
 229 Y B 0.638129 0.316173 0.045698 -> 0.638129 
 230 L B 0.714875 0.170355 0.114769 -> 0.714875 
 231 I B 0.547113 0.382854 0.070033 -> 0.547113 
 232 S B 0.896148 0.080290 0.023562 -> 0.896148 
 233 L B 0.908930 0.067268 0.023802 -> 0.908930 
 234 L B 0.518054 0.432122 0.049824 -> 0.518054 
 235 Y B 0.690327 0.288538 0.021135 -> 0.690327 
 236 F B 0.849104 0.132097 0.018799 -> 0.849104 
 237 A B 0.719957 0.231870 0.048172 -> 0.719957 
 238 A B 0.616019 0.280345 0.103636 -> 0.616019 
 239 T B 0.512969 0.372937 0.114094 -> 0.512969 
 240 N E 0.084649 0.422475 0.492876 -> 0.492876 
 241 F B 0.740088 0.232553 0.027359 -> 0.740088 
 242 P E 0.076513 0.405439 0.518048 -> 0.518048 
 243 T M 0.385645 0.413603 0.200752 -> 0.413603 
 244 N M 0.226795 0.518556 0.254649 -> 0.518556 
 245 F B 0.640020 0.296778 0.063202 -> 0.640020 
 246 I E 0.202269 0.390968 0.406763 -> 0.406763 
 247 E M 0.075746 0.527098 0.397156 -> 0.527098 
 248 S B 0.851464 0.101979 0.046557 -> 0.851464 
 249 I M 0.415842 0.486688 0.097470 -> 0.486688 
 250 K E 0.004085 0.159757 0.836158 -> 0.836158 
 251 F M 0.420073 0.468589 0.111338 -> 0.468589 
 252 V B 0.503518 0.413029 0.083452 -> 0.503518 
 253 A E 0.045328 0.259625 0.695047 -> 0.695047 
 254 D E 0.011680 0.144839 0.843481 -> 0.843481 
 255 M B 0.603490 0.345254 0.051256 -> 0.603490 
 256 P E 0.242023 0.356593 0.401384 -> 0.401384 
 257 H E 0.056999 0.350047 0.592954 -> 0.592954 
 258 R M 0.175693 0.540622 0.283686 -> 0.540622 
 259 Q M 0.187545 0.410850 0.401605 -> 0.410850 
 260 L B 0.711649 0.254158 0.034193 -> 0.711649 
 261 R E 0.043335 0.394347 0.562318 -> 0.562318 
 262 F E 0.091175 0.351714 0.557111 -> 0.557111 
 263 G E 0.074620 0.291423 0.633957 -> 0.633957 
 264 D M 0.196606 0.513210 0.290184 -> 0.513210 
 265 I M 0.143782 0.542014 0.314203 -> 0.542014 
 266 A B 0.574324 0.278269 0.147406 -> 0.574324 
 267 P B 0.473796 0.336874 0.189330 -> 0.473796 
 268 F B 0.439117 0.370266 0.190617 -> 0.439117 
 269 I B 0.691189 0.264424 0.044387 -> 0.691189 
 270 P E 0.039068 0.280669 0.680263 -> 0.680263 
 271 D E 0.038373 0.258457 0.703170 -> 0.703170 
 272 M B 0.763026 0.196586 0.040388 -> 0.763026 
 273 D M 0.073094 0.490413 0.436493 -> 0.490413 
 274 M E 0.033775 0.204166 0.762059 -> 0.762059 
 275 K E 0.032326 0.291490 0.676184 -> 0.676184 
 276 K M 0.152679 0.522492 0.324829 -> 0.522492 
 277 N B 0.492535 0.346179 0.161286 -> 0.492535 
 278 N B 0.452908 0.434909 0.112183 -> 0.452908 
 279 L B 0.859866 0.096900 0.043234 -> 0.859866 
 280 L B 0.826454 0.118112 0.055434 -> 0.826454 
 281 V B 0.675764 0.236598 0.087637 -> 0.675764 
 282 V B 0.875432 0.089409 0.035159 -> 0.875432 
 283 L B 0.870467 0.088253 0.041280 -> 0.870467 
 284 H M 0.285480 0.586919 0.127601 -> 0.586919 
 285 G B 0.763466 0.205059 0.031475 -> 0.763466 
 286 F B 0.874895 0.104322 0.020783 -> 0.874895 
 287 Y M 0.214571 0.585409 0.200021 -> 0.585409 
 288 T M 0.122981 0.439871 0.437148 -> 0.439871 
 289 V B 0.799712 0.150251 0.050037 -> 0.799712 
 290 H M 0.153690 0.522885 0.323424 -> 0.522885 
 291 S E 0.048166 0.254340 0.697494 -> 0.697494 
 292 L M 0.267366 0.476056 0.256578 -> 0.476056 
 293 S E 0.116587 0.369223 0.514190 -> 0.514190 
 294 G E 0.075746 0.261675 0.662579 -> 0.662579 
 295 G E 0.175117 0.363300 0.461583 -> 0.461583 
 296 S E 0.217205 0.369452 0.413343 -> 0.413343 
 297 S B 0.552096 0.249957 0.197947 -> 0.552096 
 298 L B 0.546237 0.355612 0.098152 -> 0.546237 
 299 T M 0.181939 0.495446 0.322615 -> 0.495446 
 300 H M 0.410499 0.417841 0.171660 -> 0.417841 
 301 W B 0.772249 0.185832 0.041918 -> 0.772249 
 302 R M 0.080905 0.608025 0.311071 -> 0.608025 
 303 N M 0.097899 0.512258 0.389842 -> 0.512258 
 304 L B 0.779473 0.195291 0.025236 -> 0.779473 
 305 M B 0.590513 0.302135 0.107351 -> 0.590513 
 306 E E 0.025355 0.220866 0.753779 -> 0.753779 
 307 S M 0.258037 0.625265 0.116697 -> 0.625265 
 308 P E 0.010910 0.124121 0.864969 -> 0.864969 
 309 V E 0.081577 0.378810 0.539614 -> 0.539614 
 310 S B 0.706885 0.230327 0.062788 -> 0.706885 
 311 R M 0.181329 0.603627 0.215044 -> 0.603627 
 312 E E 0.010659 0.168121 0.821220 -> 0.821220 
 313 M M 0.305390 0.604581 0.090029 -> 0.604581 
 314 A B 0.956653 0.035758 0.007589 -> 0.956653 
 315 R M 0.113797 0.646357 0.239846 -> 0.646357 
 316 D E 0.027260 0.354982 0.617758 -> 0.617758 
 317 M B 0.883089 0.107748 0.009163 -> 0.883089 
 318 V B 0.903328 0.083143 0.013528 -> 0.903328 
 319 N M 0.112245 0.479023 0.408732 -> 0.479023 
 320 L M 0.158872 0.555479 0.285649 -> 0.555479 
 321 I B 0.658465 0.305800 0.035735 -> 0.658465 
 322 L B 0.550398 0.373819 0.075782 -> 0.550398 
 323 A E 0.136869 0.266612 0.596519 -> 0.596519 
 324 G E 0.055671 0.187395 0.756934 -> 0.756934 
 325 T M 0.139290 0.574277 0.286433 -> 0.574277 
 326 P E 0.026709 0.208553 0.764737 -> 0.764737 
 327 V M 0.277473 0.557160 0.165367 -> 0.557160 
 328 E E 0.015697 0.220492 0.763811 -> 0.763811 
 329 V B 0.549700 0.380337 0.069963 -> 0.549700 
 330 Q B 0.678556 0.262137 0.059306 -> 0.678556 
 331 V B 0.495093 0.345541 0.159367 -> 0.495093 
 332 E M 0.252358 0.562964 0.184678 -> 0.562964 
 333 L B 0.828860 0.141174 0.029966 -> 0.828860 
 334 A B 0.516002 0.325060 0.158937 -> 0.516002 
 335 K E 0.015238 0.228520 0.756242 -> 0.756242 
 336 L M 0.268833 0.498962 0.232205 -> 0.498962 
 337 G E 0.175327 0.353659 0.471013 -> 0.471013 
 338 I M 0.431860 0.465171 0.102968 -> 0.465171 
 339 P E 0.079223 0.241520 0.679258 -> 0.679258 
 340 T E 0.049325 0.304814 0.645862 -> 0.645862 
 341 P E 0.083226 0.302584 0.614190 -> 0.614190 
 342 V M 0.119876 0.484692 0.395432 -> 0.484692 
 343 D E 0.006753 0.115452 0.877795 -> 0.877795 
 344 Y M 0.122264 0.598209 0.279528 -> 0.598209 
 345 K E 0.008018 0.068652 0.923331 -> 0.923331 
