# Supplementary material for: AcconPred: Predicting Solvent Accessibility and Contact Number Simultaneously by a Multitask Learning Framework under the Conditional Neural Fields Model
Source: Biomed Res Int. 2015 Aug 3;2015:678764. doi: 10.1155/2015/678764 (PMC4538422; doi:10.1155/2015/678764)
Supplement: Supplementary file 1 — Training/testing dataset as well as the CASP11 evaluation dataset could be found in the Supplementary Material. The CASP11 evaluation dataset contains all detailed results from SPINE-X, SANN, ACCpro5 and AcconPred. [file 678764.f1.zip › Supplmentary_Files/105_casp11_domain/casp11_domain_AcconPred/T0780-D1.reso]

# AcconPred: three-state solvent accessibility prediction results 
# probabilities are in the order of B (Bury, pACC: 0-10), M (Medium, pACC: 11-40) and E (Exposed, pACC: 41-100), 
# where pACC is the relative solvent accessibility value calculated by DSSP 
# output format: <position> <one letter amino acid> <predicted label> ... <probabilities> ... -> <maximal probability> 

 1 T E 0.005900 0.045289 0.948812 -> 0.948812 
 2 Y M 0.049959 0.489545 0.460496 -> 0.489545 
 3 T E 0.013212 0.199658 0.787130 -> 0.787130 
 4 N E 0.035303 0.419773 0.544924 -> 0.544924 
 5 T E 0.010470 0.270348 0.719183 -> 0.719183 
 6 V B 0.639166 0.351087 0.009747 -> 0.639166 
 7 T E 0.012666 0.380046 0.607288 -> 0.607288 
 8 N E 0.016346 0.263703 0.719950 -> 0.719950 
 9 V B 0.680341 0.308791 0.010868 -> 0.680341 
 10 P M 0.143472 0.487038 0.369491 -> 0.487038 
 11 I B 0.898279 0.099218 0.002503 -> 0.898279 
 12 D M 0.119452 0.665898 0.214650 -> 0.665898 
 13 I B 0.752673 0.236697 0.010630 -> 0.752673 
 14 R M 0.018534 0.547282 0.434184 -> 0.547282 
 15 Y M 0.299528 0.558905 0.141567 -> 0.558905 
 16 N M 0.130970 0.586999 0.282031 -> 0.586999 
 17 S E 0.039083 0.271496 0.689421 -> 0.689421 
 18 D E 0.004539 0.071916 0.923545 -> 0.923545 
 19 K E 0.024196 0.293406 0.682398 -> 0.682398 
 20 Y B 0.522771 0.423802 0.053427 -> 0.522771 
 21 F M 0.104145 0.631330 0.264524 -> 0.631330 
 22 I B 0.672797 0.293459 0.033744 -> 0.672797 
 23 S M 0.333427 0.494728 0.171845 -> 0.494728 
 24 G E 0.056439 0.302393 0.641168 -> 0.641168 
 25 F M 0.120751 0.493255 0.385994 -> 0.493255 
 26 A E 0.186924 0.375152 0.437924 -> 0.437924 
 27 S E 0.013371 0.249598 0.737031 -> 0.737031 
 28 E E 0.009809 0.291061 0.699130 -> 0.699130 
 29 V B 0.914775 0.082753 0.002472 -> 0.914775 
 30 S M 0.089210 0.619400 0.291391 -> 0.619400 
 31 V B 0.901973 0.093947 0.004080 -> 0.901973 
 32 V M 0.078968 0.639767 0.281265 -> 0.639767 
 33 L B 0.937023 0.061225 0.001752 -> 0.937023 
 34 T M 0.041043 0.487696 0.471262 -> 0.487696 
 35 G B 0.458382 0.421931 0.119687 -> 0.458382 
 36 A E 0.059240 0.413141 0.527619 -> 0.527619 
 37 N E 0.067758 0.356375 0.575867 -> 0.575867 
 38 R E 0.041071 0.248731 0.710197 -> 0.710197 
 39 L M 0.154057 0.520802 0.325141 -> 0.520802 
 40 S B 0.633166 0.232436 0.134398 -> 0.633166 
 41 L M 0.143482 0.461725 0.394794 -> 0.461725 
 42 A E 0.121384 0.374945 0.503671 -> 0.503671 
 43 S M 0.349389 0.400344 0.250266 -> 0.400344 
 44 E E 0.021873 0.323132 0.654996 -> 0.654996 
 45 M E 0.083871 0.298341 0.617788 -> 0.617788 
 46 Q E 0.048887 0.323274 0.627839 -> 0.627839 
 47 E E 0.020863 0.239056 0.740081 -> 0.740081 
 48 S M 0.118428 0.492239 0.389332 -> 0.492239 
 49 T M 0.219722 0.515658 0.264619 -> 0.515658 
 50 R E 0.012823 0.208334 0.778843 -> 0.778843 
 51 K E 0.016655 0.403803 0.579543 -> 0.579543 
 52 F B 0.928298 0.069096 0.002606 -> 0.928298 
 53 K M 0.021409 0.547552 0.431039 -> 0.547552 
 54 V B 0.918919 0.078676 0.002405 -> 0.918919 
 55 T M 0.156271 0.751721 0.092009 -> 0.751721 
 56 A B 0.932487 0.064294 0.003219 -> 0.932487 
 57 D M 0.161963 0.708635 0.129402 -> 0.708635 
 58 L B 0.968113 0.028769 0.003118 -> 0.968113 
 59 T E 0.007289 0.193010 0.799701 -> 0.799701 
 60 D E 0.001735 0.051189 0.947076 -> 0.947076 
 61 A M 0.354945 0.573960 0.071095 -> 0.573960 
 62 G E 0.006802 0.131033 0.862164 -> 0.862164 
 63 V E 0.011438 0.149099 0.839463 -> 0.839463 
 64 G M 0.221672 0.554875 0.223453 -> 0.554875 
 65 T E 0.007641 0.169070 0.823289 -> 0.823289 
 66 I M 0.398537 0.579526 0.021937 -> 0.579526 
 67 E E 0.001829 0.147485 0.850685 -> 0.850685 
 68 V B 0.612529 0.378132 0.009339 -> 0.612529 
 69 P E 0.007017 0.216369 0.776614 -> 0.776614 
 70 L B 0.815887 0.182117 0.001996 -> 0.815887 
 71 S M 0.029615 0.532212 0.438173 -> 0.532212 
 72 I M 0.365352 0.568416 0.066232 -> 0.568416 
 73 E E 0.016028 0.346299 0.637673 -> 0.637673 
 74 D E 0.092493 0.414138 0.493368 -> 0.493368 
 75 L M 0.389500 0.507019 0.103480 -> 0.507019 
 76 P E 0.153746 0.383129 0.463124 -> 0.463124 
 77 N E 0.004356 0.057302 0.938342 -> 0.938342 
 78 G E 0.027954 0.191761 0.780285 -> 0.780285 
 79 L M 0.441056 0.524895 0.034048 -> 0.524895 
 80 T E 0.017567 0.258963 0.723470 -> 0.723470 
 81 A M 0.321048 0.626395 0.052557 -> 0.626395 
 82 V E 0.026063 0.318409 0.655528 -> 0.655528 
 83 A M 0.413065 0.518802 0.068133 -> 0.518802 
 84 T E 0.016715 0.292369 0.690916 -> 0.690916 
 85 P M 0.340888 0.560056 0.099056 -> 0.560056 
 86 Q E 0.008315 0.207755 0.783930 -> 0.783930 
 87 K E 0.007326 0.191140 0.801534 -> 0.801534 
 88 I B 0.955685 0.043642 0.000673 -> 0.955685 
 89 T E 0.017077 0.422051 0.560873 -> 0.560873 
 90 V B 0.805850 0.179081 0.015069 -> 0.805850 
 91 K E 0.006519 0.373045 0.620436 -> 0.620436 
 92 I B 0.698360 0.291600 0.010040 -> 0.698360 
 93 G M 0.059752 0.555864 0.384384 -> 0.555864 
 94 K E 0.011913 0.187979 0.800107 -> 0.800107 
 95 K E 0.005591 0.063934 0.930476 -> 0.930476 
