# Supplementary material for: AcconPred: Predicting Solvent Accessibility and Contact Number Simultaneously by a Multitask Learning Framework under the Conditional Neural Fields Model
Source: Biomed Res Int. 2015 Aug 3;2015:678764. doi: 10.1155/2015/678764 (PMC4538422; doi:10.1155/2015/678764)
Supplement: Supplementary file 1 — Training/testing dataset as well as the CASP11 evaluation dataset could be found in the Supplementary Material. The CASP11 evaluation dataset contains all detailed results from SPINE-X, SANN, ACCpro5 and AcconPred. [file 678764.f1.zip › Supplmentary_Files/105_casp11_domain/casp11_domain_AcconPred/T0780-D2.reso]

# AcconPred: three-state solvent accessibility prediction results 
# probabilities are in the order of B (Bury, pACC: 0-10), M (Medium, pACC: 11-40) and E (Exposed, pACC: 41-100), 
# where pACC is the relative solvent accessibility value calculated by DSSP 
# output format: <position> <one letter amino acid> <predicted label> ... <probabilities> ... -> <maximal probability> 

 1 A E 0.006314 0.039372 0.954313 -> 0.954313 
 2 Q E 0.022252 0.197859 0.779889 -> 0.779889 
 3 K E 0.004320 0.089033 0.906647 -> 0.906647 
 4 D E 0.028174 0.396053 0.575773 -> 0.575773 
 5 K E 0.001953 0.076900 0.921147 -> 0.921147 
 6 V B 0.576084 0.411103 0.012813 -> 0.576084 
 7 K E 0.001597 0.150139 0.848264 -> 0.848264 
 8 I B 0.806096 0.191569 0.002334 -> 0.806096 
 9 V M 0.042591 0.692812 0.264597 -> 0.692812 
 10 P B 0.500734 0.459255 0.040011 -> 0.500734 
 11 E E 0.008504 0.311121 0.680375 -> 0.680375 
 12 I B 0.558266 0.421886 0.019849 -> 0.558266 
 13 D M 0.035386 0.617230 0.347384 -> 0.617230 
 14 P E 0.035393 0.184309 0.780298 -> 0.780298 
 15 S E 0.004693 0.046695 0.948612 -> 0.948612 
 16 Q E 0.019400 0.335790 0.644810 -> 0.644810 
 17 I M 0.440164 0.489323 0.070512 -> 0.489323 
 18 D E 0.027239 0.388872 0.583889 -> 0.583889 
 19 S E 0.013226 0.132008 0.854765 -> 0.854765 
 20 R E 0.013615 0.229475 0.756910 -> 0.756910 
 21 V B 0.613922 0.362932 0.023147 -> 0.613922 
 22 Q E 0.036143 0.463873 0.499984 -> 0.499984 
 23 I M 0.470734 0.486608 0.042658 -> 0.486608 
 24 E E 0.007251 0.266656 0.726093 -> 0.726093 
 25 N E 0.013215 0.223988 0.762797 -> 0.762797 
 26 V M 0.358119 0.587628 0.054253 -> 0.587628 
 27 M E 0.008437 0.226702 0.764862 -> 0.764862 
 28 V M 0.284328 0.605024 0.110648 -> 0.605024 
 29 S E 0.015995 0.262153 0.721852 -> 0.721852 
 30 D M 0.076974 0.488847 0.434179 -> 0.488847 
 31 K E 0.001181 0.087085 0.911734 -> 0.911734 
 32 E E 0.011501 0.321723 0.666776 -> 0.666776 
 33 V B 0.861966 0.134832 0.003202 -> 0.861966 
 34 S E 0.033055 0.451159 0.515787 -> 0.515787 
 35 I B 0.767333 0.223938 0.008730 -> 0.767333 
 36 T M 0.053860 0.544402 0.401738 -> 0.544402 
 37 S M 0.321144 0.497813 0.181043 -> 0.497813 
 38 D M 0.070738 0.521558 0.407704 -> 0.521558 
 39 Q E 0.009953 0.244861 0.745186 -> 0.745186 
 40 E E 0.007582 0.092447 0.899971 -> 0.899971 
 41 T M 0.165313 0.745200 0.089487 -> 0.745200 
 42 L B 0.844757 0.143307 0.011936 -> 0.844757 
 43 D E 0.005902 0.119116 0.874982 -> 0.874982 
 44 R E 0.012643 0.355798 0.631559 -> 0.631559 
 45 I B 0.618222 0.375660 0.006118 -> 0.618222 
 46 D E 0.006983 0.379149 0.613867 -> 0.613867 
 47 K E 0.011942 0.486587 0.501471 -> 0.501471 
 48 I B 0.831060 0.165846 0.003095 -> 0.831060 
 49 I M 0.225422 0.689922 0.084655 -> 0.689922 
 50 A B 0.883019 0.111724 0.005257 -> 0.883019 
 51 V M 0.145792 0.607876 0.246332 -> 0.607876 
 52 L B 0.820814 0.172466 0.006720 -> 0.820814 
 53 P E 0.073370 0.452282 0.474348 -> 0.474348 
 54 T E 0.142376 0.414807 0.442817 -> 0.442817 
 55 S E 0.079994 0.366154 0.553852 -> 0.553852 
 56 E E 0.006933 0.084168 0.908899 -> 0.908899 
 57 R E 0.016433 0.255628 0.727939 -> 0.727939 
 58 I B 0.459857 0.456641 0.083502 -> 0.459857 
 59 T E 0.020106 0.168292 0.811602 -> 0.811602 
 60 G E 0.016521 0.182411 0.801068 -> 0.801068 
 61 N E 0.026641 0.292291 0.681069 -> 0.681069 
 62 Y M 0.246265 0.648172 0.105562 -> 0.648172 
 63 S E 0.012100 0.183748 0.804152 -> 0.804152 
 64 G M 0.179781 0.645860 0.174359 -> 0.645860 
 65 S E 0.012209 0.274494 0.713297 -> 0.713297 
 66 V B 0.760612 0.235648 0.003740 -> 0.760612 
 67 P E 0.007777 0.284396 0.707828 -> 0.707828 
 68 L B 0.772200 0.226147 0.001653 -> 0.772200 
 69 Q M 0.059575 0.776607 0.163818 -> 0.776607 
 70 A B 0.901397 0.093175 0.005428 -> 0.901397 
 71 I M 0.309558 0.648719 0.041723 -> 0.648719 
 72 D B 0.710144 0.253389 0.036468 -> 0.710144 
 73 R E 0.009738 0.141768 0.848494 -> 0.848494 
 74 N E 0.000876 0.037507 0.961617 -> 0.961617 
 75 G E 0.061857 0.401819 0.536324 -> 0.536324 
 76 V M 0.061837 0.495230 0.442933 -> 0.495230 
 77 V E 0.029010 0.254091 0.716899 -> 0.716899 
 78 L B 0.661235 0.330733 0.008032 -> 0.661235 
 79 P E 0.022707 0.269722 0.707571 -> 0.707571 
 80 A B 0.513467 0.422701 0.063833 -> 0.513467 
 81 V E 0.020978 0.351657 0.627365 -> 0.627365 
 82 I B 0.648360 0.330372 0.021268 -> 0.648360 
 83 T E 0.031432 0.421850 0.546718 -> 0.546718 
 84 P B 0.437145 0.422708 0.140147 -> 0.437145 
 85 F E 0.024479 0.355612 0.619909 -> 0.619909 
 86 D E 0.011118 0.165430 0.823453 -> 0.823453 
 87 T B 0.672201 0.321676 0.006123 -> 0.672201 
 88 I M 0.065043 0.474848 0.460108 -> 0.474848 
 89 M B 0.794611 0.198340 0.007050 -> 0.794611 
 90 K E 0.006562 0.313333 0.680105 -> 0.680105 
 91 V B 0.807790 0.186398 0.005812 -> 0.807790 
 92 T E 0.018406 0.323105 0.658489 -> 0.658489 
 93 T B 0.577648 0.415635 0.006717 -> 0.577648 
 94 K E 0.003153 0.191833 0.805014 -> 0.805014 
 95 P E 0.020867 0.177561 0.801572 -> 0.801572 
 96 V E 0.011103 0.269441 0.719456 -> 0.719456 
