# Supplementary material for: AcconPred: Predicting Solvent Accessibility and Contact Number Simultaneously by a Multitask Learning Framework under the Conditional Neural Fields Model
Source: Biomed Res Int. 2015 Aug 3;2015:678764. doi: 10.1155/2015/678764 (PMC4538422; doi:10.1155/2015/678764)
Supplement: Supplementary file 1 — Training/testing dataset as well as the CASP11 evaluation dataset could be found in the Supplementary Material. The CASP11 evaluation dataset contains all detailed results from SPINE-X, SANN, ACCpro5 and AcconPred. [file 678764.f1.zip › Supplmentary_Files/105_casp11_domain/casp11_domain_AcconPred/T0781-D1.reso]

# AcconPred: three-state solvent accessibility prediction results 
# probabilities are in the order of B (Bury, pACC: 0-10), M (Medium, pACC: 11-40) and E (Exposed, pACC: 41-100), 
# where pACC is the relative solvent accessibility value calculated by DSSP 
# output format: <position> <one letter amino acid> <predicted label> ... <probabilities> ... -> <maximal probability> 

 1 V E 0.009145 0.052973 0.937882 -> 0.937882 
 2 T E 0.018118 0.130089 0.851793 -> 0.851793 
 3 E E 0.009595 0.126917 0.863489 -> 0.863489 
 4 S E 0.017218 0.170412 0.812370 -> 0.812370 
 5 L M 0.249721 0.528504 0.221774 -> 0.528504 
 6 Q E 0.008274 0.160637 0.831089 -> 0.831089 
 7 K E 0.002472 0.064947 0.932581 -> 0.932581 
 8 E E 0.019354 0.236261 0.744386 -> 0.744386 
 9 S E 0.031450 0.243138 0.725411 -> 0.725411 
 10 E E 0.011780 0.169352 0.818868 -> 0.818868 
 11 I M 0.197854 0.537763 0.264383 -> 0.537763 
 12 T E 0.063387 0.311102 0.625511 -> 0.625511 
 13 S E 0.102868 0.335314 0.561818 -> 0.561818 
 14 F M 0.439542 0.479734 0.080724 -> 0.479734 
 15 S E 0.039238 0.320937 0.639824 -> 0.639824 
 16 E E 0.020069 0.249781 0.730150 -> 0.730150 
 17 E E 0.068465 0.408218 0.523317 -> 0.523317 
 18 E M 0.116928 0.507835 0.375238 -> 0.507835 
 19 E M 0.131739 0.470942 0.397319 -> 0.470942 
 20 A B 0.642503 0.264642 0.092855 -> 0.642503 
 21 V B 0.740559 0.224757 0.034684 -> 0.740559 
 22 L M 0.370350 0.401363 0.228286 -> 0.401363 
 23 Y M 0.266052 0.567200 0.166749 -> 0.567200 
 24 M B 0.921052 0.064488 0.014460 -> 0.921052 
 25 L B 0.702317 0.270118 0.027564 -> 0.702317 
 26 S M 0.140908 0.462700 0.396393 -> 0.462700 
 27 A B 0.566038 0.322607 0.111355 -> 0.566038 
 28 L B 0.691225 0.291006 0.017770 -> 0.691225 
 29 K E 0.006622 0.233042 0.760336 -> 0.760336 
 30 K E 0.001822 0.052577 0.945601 -> 0.945601 
 31 N E 0.022281 0.294132 0.683587 -> 0.683587 
 32 D E 0.048950 0.394035 0.557015 -> 0.557015 
 33 L M 0.442774 0.461303 0.095923 -> 0.461303 
 34 D E 0.090970 0.391328 0.517701 -> 0.517701 
 35 M M 0.125652 0.476718 0.397631 -> 0.476718 
 36 A B 0.513423 0.284393 0.202184 -> 0.513423 
 37 L B 0.607883 0.295867 0.096250 -> 0.607883 
 38 R E 0.038336 0.299970 0.661695 -> 0.661695 
 39 G E 0.159707 0.227404 0.612889 -> 0.612889 
 40 C B 0.514798 0.413987 0.071216 -> 0.514798 
 41 A E 0.190806 0.314718 0.494476 -> 0.494476 
 42 I M 0.373062 0.435580 0.191359 -> 0.435580 
 43 D M 0.098859 0.458645 0.442496 -> 0.458645 
 44 E E 0.049733 0.312317 0.637950 -> 0.637950 
 45 T M 0.212162 0.417743 0.370095 -> 0.417743 
 46 A B 0.610942 0.275215 0.113844 -> 0.610942 
 47 L B 0.662349 0.271737 0.065914 -> 0.662349 
 48 Q M 0.205422 0.580839 0.213739 -> 0.580839 
 49 I B 0.762767 0.197251 0.039983 -> 0.762767 
 50 N M 0.277704 0.513841 0.208456 -> 0.513841 
 51 F B 0.741680 0.209562 0.048759 -> 0.741680 
 52 V B 0.482903 0.393888 0.123209 -> 0.482903 
 53 K E 0.029887 0.340381 0.629732 -> 0.629732 
 54 T M 0.313230 0.509251 0.177519 -> 0.509251 
 55 A B 0.606744 0.306752 0.086504 -> 0.606744 
 56 E E 0.011286 0.172467 0.816247 -> 0.816247 
 57 E E 0.015416 0.198019 0.786565 -> 0.786565 
 58 L M 0.395344 0.508240 0.096416 -> 0.508240 
 59 P E 0.036450 0.214059 0.749491 -> 0.749491 
 60 G E 0.072228 0.228282 0.699490 -> 0.699490 
 61 M B 0.549389 0.395593 0.055018 -> 0.549389 
 62 Q E 0.059589 0.429083 0.511328 -> 0.511328 
 63 L M 0.302311 0.501215 0.196474 -> 0.501215 
 64 I M 0.229527 0.502092 0.268381 -> 0.502092 
 65 D E 0.045306 0.291018 0.663676 -> 0.663676 
 66 L M 0.257380 0.528405 0.214215 -> 0.528405 
 67 P E 0.129063 0.272277 0.598660 -> 0.598660 
 68 A M 0.333449 0.348406 0.318145 -> 0.348406 
 69 P E 0.191733 0.341172 0.467094 -> 0.467094 
 70 T E 0.088754 0.307876 0.603371 -> 0.603371 
 71 S E 0.093215 0.306628 0.600157 -> 0.600157 
 72 D E 0.035945 0.216896 0.747159 -> 0.747159 
 73 Y M 0.372926 0.514282 0.112792 -> 0.514282 
 74 S E 0.239211 0.319166 0.441623 -> 0.441623 
 75 Y M 0.165414 0.464385 0.370201 -> 0.464385 
 76 Y M 0.346864 0.447968 0.205168 -> 0.447968 
 77 F B 0.488164 0.406393 0.105443 -> 0.488164 
 78 P E 0.093246 0.330276 0.576477 -> 0.576477 
 79 L B 0.554535 0.324450 0.121015 -> 0.554535 
 80 T M 0.339076 0.400439 0.260484 -> 0.400439 
 81 S B 0.424398 0.373830 0.201772 -> 0.424398 
 82 A E 0.214722 0.347255 0.438023 -> 0.438023 
 83 E E 0.026709 0.242076 0.731214 -> 0.731214 
 84 M B 0.607041 0.317960 0.074999 -> 0.607041 
 85 T B 0.633648 0.295133 0.071219 -> 0.633648 
 86 K E 0.005764 0.216642 0.777593 -> 0.777593 
 87 A E 0.078000 0.358832 0.563168 -> 0.563168 
 88 Y B 0.628100 0.350779 0.021120 -> 0.628100 
 89 I B 0.578159 0.390182 0.031658 -> 0.578159 
 90 E E 0.004857 0.151975 0.843168 -> 0.843168 
 91 Q M 0.056571 0.634670 0.308759 -> 0.634670 
 92 F B 0.837776 0.146746 0.015478 -> 0.837776 
 93 E E 0.007833 0.253113 0.739054 -> 0.739054 
 94 E E 0.001944 0.114269 0.883787 -> 0.883787 
 95 L B 0.642892 0.340160 0.016948 -> 0.642892 
 96 S M 0.172161 0.587591 0.240248 -> 0.587591 
 97 T E 0.012817 0.130630 0.856553 -> 0.856553 
 98 E E 0.010601 0.254723 0.734677 -> 0.734677 
 99 I B 0.660732 0.314851 0.024417 -> 0.660732 
 100 P E 0.014947 0.180201 0.804853 -> 0.804853 
 101 E E 0.003962 0.114521 0.881518 -> 0.881518 
 102 I M 0.272242 0.572922 0.154837 -> 0.572922 
 103 E E 0.015052 0.186721 0.798228 -> 0.798228 
 104 T E 0.051155 0.369895 0.578949 -> 0.578949 
 105 L B 0.656764 0.272835 0.070400 -> 0.656764 
 106 E M 0.075238 0.521753 0.403009 -> 0.521753 
 107 V B 0.646299 0.254418 0.099284 -> 0.646299 
 108 L M 0.237480 0.534162 0.228358 -> 0.534162 
 109 E E 0.059949 0.431105 0.508946 -> 0.508946 
 110 I B 0.499357 0.388108 0.112535 -> 0.499357 
 111 A B 0.497629 0.328975 0.173396 -> 0.497629 
 112 E E 0.030858 0.357164 0.611978 -> 0.611978 
 113 K E 0.019231 0.228322 0.752447 -> 0.752447 
 114 K E 0.028578 0.288203 0.683219 -> 0.683219 
 115 E E 0.031111 0.228460 0.740429 -> 0.740429 
 116 K E 0.006646 0.107731 0.885623 -> 0.885623 
 117 E E 0.020642 0.270412 0.708946 -> 0.708946 
 118 R M 0.056144 0.532821 0.411035 -> 0.532821 
 119 E E 0.060891 0.429026 0.510082 -> 0.510082 
 120 E E 0.009759 0.181580 0.808661 -> 0.808661 
 121 Q M 0.046946 0.513867 0.439187 -> 0.513867 
 122 L B 0.632885 0.282009 0.085107 -> 0.632885 
 123 A M 0.288878 0.427425 0.283697 -> 0.427425 
 124 E E 0.013283 0.177470 0.809247 -> 0.809247 
 125 C M 0.349434 0.514725 0.135841 -> 0.514725 
 126 L B 0.550483 0.353191 0.096327 -> 0.550483 
 127 A E 0.211454 0.310370 0.478176 -> 0.478176 
 128 A E 0.101659 0.274024 0.624317 -> 0.624317 
 129 Q E 0.033110 0.215153 0.751737 -> 0.751737 
 130 E M 0.149615 0.548169 0.302216 -> 0.548169 
 131 V B 0.723712 0.236107 0.040181 -> 0.723712 
 132 S M 0.304208 0.398367 0.297425 -> 0.398367 
 133 E M 0.191907 0.542235 0.265858 -> 0.542235 
 134 L B 0.846425 0.126835 0.026740 -> 0.846425 
 135 E M 0.310238 0.531990 0.157772 -> 0.531990 
 136 I B 0.857633 0.118520 0.023847 -> 0.857633 
 137 Y M 0.444988 0.499002 0.056010 -> 0.499002 
 138 V B 0.869677 0.117599 0.012724 -> 0.869677 
 139 K E 0.052510 0.468472 0.479018 -> 0.479018 
 140 C B 0.554100 0.391697 0.054203 -> 0.554100 
 141 G E 0.075351 0.372878 0.551771 -> 0.551771 
 142 E E 0.025655 0.205012 0.769333 -> 0.769333 
 143 Q E 0.033138 0.292301 0.674561 -> 0.674561 
 144 S M 0.217441 0.398383 0.384176 -> 0.398383 
 145 Y M 0.449769 0.450153 0.100078 -> 0.450153 
 146 R M 0.183027 0.599704 0.217269 -> 0.599704 
 147 L B 0.856205 0.123282 0.020513 -> 0.856205 
 148 G B 0.712410 0.210000 0.077590 -> 0.712410 
 149 F B 0.871516 0.113048 0.015436 -> 0.871516 
 150 T M 0.418873 0.449678 0.131449 -> 0.449678 
 151 A B 0.765451 0.181727 0.052822 -> 0.765451 
 152 V B 0.647363 0.290005 0.062632 -> 0.647363 
 153 Q M 0.155807 0.550118 0.294075 -> 0.550118 
 154 Y M 0.339658 0.526486 0.133856 -> 0.526486 
 155 E E 0.063917 0.354678 0.581404 -> 0.581404 
 156 K E 0.012509 0.131395 0.856095 -> 0.856095 
 157 N E 0.061518 0.354489 0.583992 -> 0.583992 
 158 W B 0.622817 0.330684 0.046499 -> 0.622817 
 159 K E 0.032672 0.397944 0.569384 -> 0.569384 
 160 I B 0.584790 0.361244 0.053966 -> 0.584790 
 161 H M 0.206408 0.619640 0.173952 -> 0.619640 
 162 S M 0.312263 0.444322 0.243415 -> 0.444322 
 163 L B 0.635589 0.313759 0.050652 -> 0.635589 
 164 K E 0.020808 0.248755 0.730437 -> 0.730437 
 165 E E 0.050548 0.248491 0.700961 -> 0.700961 
 166 G B 0.357049 0.300519 0.342432 -> 0.357049 
 167 L B 0.517361 0.393307 0.089332 -> 0.517361 
 168 L B 0.526289 0.333047 0.140664 -> 0.526289 
 169 Y M 0.145381 0.518718 0.335901 -> 0.518718 
 170 E E 0.075480 0.351616 0.572904 -> 0.572904 
 171 T E 0.137176 0.424204 0.438620 -> 0.438620 
 172 D E 0.017690 0.181936 0.800374 -> 0.800374 
 173 I M 0.265872 0.570190 0.163938 -> 0.570190 
 174 P E 0.060206 0.267441 0.672353 -> 0.672353 
 175 A E 0.204456 0.270796 0.524747 -> 0.524747 
 176 C E 0.255115 0.368327 0.376557 -> 0.376557 
 177 V M 0.314415 0.455870 0.229715 -> 0.455870 
 178 Q E 0.051970 0.342450 0.605580 -> 0.605580 
 179 M B 0.527546 0.398537 0.073916 -> 0.527546 
 180 E E 0.011204 0.237345 0.751451 -> 0.751451 
 181 E E 0.016419 0.269844 0.713737 -> 0.713737 
 182 M B 0.503599 0.437215 0.059186 -> 0.503599 
 183 R E 0.022218 0.390781 0.587001 -> 0.587001 
 184 E E 0.005817 0.104555 0.889628 -> 0.889628 
 185 A E 0.198911 0.363135 0.437954 -> 0.437954 
 186 K E 0.017331 0.214754 0.767915 -> 0.767915 
 187 K E 0.007021 0.200645 0.792334 -> 0.792334 
 188 T E 0.111816 0.426631 0.461553 -> 0.461553 
 189 Y M 0.236957 0.583808 0.179235 -> 0.583808 
 190 V B 0.416028 0.413279 0.170693 -> 0.416028 
 191 L B 0.667542 0.281314 0.051144 -> 0.667542 
 192 P M 0.180385 0.434543 0.385072 -> 0.434543 
 193 N E 0.042636 0.254189 0.703175 -> 0.703175 
 194 Q E 0.047308 0.323909 0.628783 -> 0.628783 
 195 L B 0.559513 0.385836 0.054651 -> 0.559513 
 196 T E 0.043635 0.264815 0.691550 -> 0.691550 
 197 G E 0.040610 0.152500 0.806890 -> 0.806890 
 198 A E 0.036925 0.255962 0.707113 -> 0.707113 
 199 N E 0.013434 0.126092 0.860474 -> 0.860474 
 200 Y E 0.009976 0.171942 0.818082 -> 0.818082 
