# Supplementary material for: AcconPred: Predicting Solvent Accessibility and Contact Number Simultaneously by a Multitask Learning Framework under the Conditional Neural Fields Model
Source: Biomed Res Int. 2015 Aug 3;2015:678764. doi: 10.1155/2015/678764 (PMC4538422; doi:10.1155/2015/678764)
Supplement: Supplementary file 1 — Training/testing dataset as well as the CASP11 evaluation dataset could be found in the Supplementary Material. The CASP11 evaluation dataset contains all detailed results from SPINE-X, SANN, ACCpro5 and AcconPred. [file 678764.f1.zip › Supplmentary_Files/105_casp11_domain/casp11_domain_AcconPred/T0781-D2.reso]

# AcconPred: three-state solvent accessibility prediction results 
# probabilities are in the order of B (Bury, pACC: 0-10), M (Medium, pACC: 11-40) and E (Exposed, pACC: 41-100), 
# where pACC is the relative solvent accessibility value calculated by DSSP 
# output format: <position> <one letter amino acid> <predicted label> ... <probabilities> ... -> <maximal probability> 

 1 F E 0.023217 0.098894 0.877889 -> 0.877889 
 2 Q E 0.008693 0.112935 0.878372 -> 0.878372 
 3 A E 0.070395 0.231976 0.697629 -> 0.697629 
 4 M E 0.075350 0.438655 0.485995 -> 0.485995 
 5 P E 0.041413 0.205898 0.752689 -> 0.752689 
 6 I M 0.358484 0.503361 0.138155 -> 0.503361 
 7 S E 0.064484 0.349254 0.586262 -> 0.586262 
 8 E E 0.008382 0.119698 0.871921 -> 0.871921 
 9 K E 0.001782 0.057196 0.941022 -> 0.941022 
 10 T M 0.158684 0.548253 0.293064 -> 0.548253 
 11 P E 0.132141 0.432323 0.435535 -> 0.435535 
 12 Q E 0.013340 0.170310 0.816350 -> 0.816350 
 13 R M 0.040708 0.493179 0.466113 -> 0.493179 
 14 A B 0.701095 0.257749 0.041156 -> 0.701095 
 15 V B 0.880571 0.101075 0.018354 -> 0.880571 
 16 E M 0.108869 0.544017 0.347114 -> 0.544017 
 17 Q M 0.185157 0.568744 0.246099 -> 0.568744 
 18 F B 0.945175 0.049870 0.004955 -> 0.945175 
 19 I B 0.762972 0.213429 0.023599 -> 0.762972 
 20 Y M 0.078500 0.560515 0.360985 -> 0.560515 
 21 A B 0.701102 0.253433 0.045466 -> 0.701102 
 22 I B 0.736106 0.238867 0.025026 -> 0.736106 
 23 E E 0.031710 0.351076 0.617215 -> 0.617215 
 24 K E 0.013052 0.131852 0.855096 -> 0.855096 
 25 G M 0.311645 0.447089 0.241265 -> 0.447089 
 26 D E 0.079266 0.383784 0.536950 -> 0.536950 
 27 L B 0.495041 0.386765 0.118194 -> 0.495041 
 28 T M 0.253369 0.385728 0.360903 -> 0.385728 
 29 R M 0.076230 0.499823 0.423947 -> 0.499823 
 30 A B 0.764733 0.176423 0.058844 -> 0.764733 
 31 L B 0.672849 0.232290 0.094861 -> 0.672849 
 32 A B 0.479360 0.249998 0.270642 -> 0.479360 
 33 F B 0.481750 0.373208 0.145042 -> 0.481750 
 34 A B 0.654198 0.259077 0.086724 -> 0.654198 
 35 T M 0.331441 0.430037 0.238521 -> 0.430037 
 36 T E 0.095071 0.349845 0.555084 -> 0.555084 
 37 E E 0.014181 0.150870 0.834949 -> 0.834949 
 38 S E 0.051266 0.348439 0.600295 -> 0.600295 
 39 S E 0.072112 0.313287 0.614600 -> 0.614600 
 40 Q E 0.008358 0.093094 0.898548 -> 0.898548 
 41 D E 0.032386 0.238932 0.728682 -> 0.728682 
 42 T E 0.102900 0.419153 0.477947 -> 0.477947 
 43 S M 0.156511 0.540516 0.302973 -> 0.540516 
 44 P E 0.072837 0.437855 0.489308 -> 0.489308 
 45 E E 0.006197 0.119613 0.874190 -> 0.874190 
 46 L M 0.350818 0.548145 0.101037 -> 0.548145 
 47 L B 0.656835 0.318399 0.024766 -> 0.656835 
 48 K E 0.003481 0.117244 0.879275 -> 0.879275 
 49 K E 0.003679 0.133887 0.862434 -> 0.862434 
 50 Q M 0.190906 0.577557 0.231537 -> 0.577557 
 51 G E 0.079889 0.367597 0.552513 -> 0.552513 
 52 E E 0.015540 0.171614 0.812845 -> 0.812845 
 53 Y B 0.496051 0.452755 0.051194 -> 0.496051 
 54 A B 0.525667 0.400042 0.074292 -> 0.525667 
 55 K E 0.003304 0.106331 0.890365 -> 0.890365 
 56 E M 0.108438 0.576927 0.314635 -> 0.576927 
 57 L B 0.927013 0.055755 0.017232 -> 0.927013 
 58 K M 0.124842 0.559517 0.315641 -> 0.559517 
 59 T E 0.116203 0.416450 0.467347 -> 0.467347 
 60 M B 0.641569 0.324896 0.033535 -> 0.641569 
 61 L B 0.831420 0.146092 0.022488 -> 0.831420 
 62 Y M 0.213156 0.516157 0.270687 -> 0.516157 
 63 G E 0.349398 0.278780 0.371822 -> 0.371822 
 64 F B 0.657779 0.271147 0.071074 -> 0.657779 
 65 L B 0.498923 0.376274 0.124803 -> 0.498923 
 66 G E 0.219966 0.307097 0.472937 -> 0.472937 
 67 T E 0.076728 0.405673 0.517599 -> 0.517599 
 68 E E 0.021251 0.177001 0.801748 -> 0.801748 
 69 D E 0.092677 0.365161 0.542161 -> 0.542161 
 70 A B 0.570933 0.321108 0.107959 -> 0.570933 
 71 R E 0.017793 0.279727 0.702480 -> 0.702480 
 72 L M 0.356500 0.405708 0.237792 -> 0.405708 
 73 Y M 0.155325 0.548166 0.296510 -> 0.548166 
 74 G E 0.155869 0.347087 0.497044 -> 0.497044 
 75 K E 0.017544 0.265262 0.717194 -> 0.717194 
 76 S E 0.091888 0.414918 0.493194 -> 0.493194 
 77 E E 0.025039 0.365412 0.609549 -> 0.609549 
 78 E E 0.007421 0.102188 0.890391 -> 0.890391 
 79 Q M 0.050659 0.597792 0.351549 -> 0.597792 
 80 L B 0.727437 0.250051 0.022511 -> 0.727437 
 81 N E 0.025542 0.419190 0.555268 -> 0.555268 
 82 K E 0.003011 0.143116 0.853873 -> 0.853873 
 83 L B 0.636920 0.338046 0.025034 -> 0.636920 
 84 R M 0.049640 0.590492 0.359868 -> 0.590492 
 85 G E 0.004734 0.063860 0.931406 -> 0.931406 
 86 K E 0.004612 0.161125 0.834264 -> 0.834264 
 87 L B 0.524022 0.409938 0.066040 -> 0.524022 
 88 N M 0.065797 0.480171 0.454032 -> 0.480171 
 89 P M 0.147731 0.449407 0.402862 -> 0.449407 
 90 E E 0.018216 0.299746 0.682037 -> 0.682037 
 91 Y M 0.401408 0.538558 0.060033 -> 0.538558 
 92 M B 0.763547 0.206399 0.030054 -> 0.763547 
 93 V B 0.885725 0.088559 0.025715 -> 0.885725 
 94 Y M 0.326087 0.595816 0.078097 -> 0.595816 
 95 L B 0.891313 0.092176 0.016511 -> 0.891313 
 96 D M 0.433600 0.465323 0.101077 -> 0.465323 
 97 L B 0.803715 0.171524 0.024761 -> 0.803715 
 98 I M 0.388294 0.476430 0.135276 -> 0.476430 
 99 K E 0.026790 0.322711 0.650499 -> 0.650499 
 100 V M 0.331971 0.388918 0.279111 -> 0.388918 
 101 I B 0.621801 0.323681 0.054519 -> 0.621801 
 102 P M 0.296913 0.440866 0.262221 -> 0.440866 
 103 I B 0.620302 0.307992 0.071707 -> 0.620302 
 104 E E 0.028946 0.353381 0.617674 -> 0.617674 
 105 T M 0.079870 0.467279 0.452850 -> 0.467279 
 106 E E 0.015447 0.195579 0.788974 -> 0.788974 
 107 E E 0.007344 0.101087 0.891569 -> 0.891569 
 108 N E 0.056471 0.377730 0.565799 -> 0.565799 
 109 T E 0.052069 0.330575 0.617357 -> 0.617357 
 110 E E 0.021143 0.167483 0.811374 -> 0.811374 
 111 T M 0.101806 0.484347 0.413847 -> 0.484347 
 112 V B 0.610842 0.339802 0.049355 -> 0.610842 
 113 K E 0.026811 0.327015 0.646174 -> 0.646174 
 114 Q M 0.170379 0.492126 0.337495 -> 0.492126 
 115 Y B 0.571906 0.393695 0.034399 -> 0.571906 
 116 A B 0.873415 0.113934 0.012651 -> 0.873415 
 117 G B 0.886998 0.098189 0.014813 -> 0.886998 
 118 L B 0.911731 0.079893 0.008376 -> 0.911731 
 119 Y B 0.735363 0.239648 0.024989 -> 0.735363 
 120 S B 0.745426 0.228109 0.026465 -> 0.745426 
 121 Y B 0.505398 0.428040 0.066562 -> 0.505398 
 122 N E 0.129919 0.405120 0.464962 -> 0.464962 
 123 G E 0.193912 0.319348 0.486740 -> 0.486740 
 124 K E 0.012228 0.205318 0.782453 -> 0.782453 
 125 N M 0.244360 0.460730 0.294910 -> 0.460730 
 126 Y M 0.355162 0.526915 0.117923 -> 0.526915 
 127 L B 0.746383 0.228087 0.025529 -> 0.746383 
 128 T B 0.566626 0.341046 0.092327 -> 0.566626 
 129 G B 0.707761 0.186062 0.106178 -> 0.707761 
 130 Y B 0.574917 0.363399 0.061684 -> 0.574917 
 131 T B 0.477914 0.410755 0.111331 -> 0.477914 
 132 L B 0.787499 0.197269 0.015232 -> 0.787499 
 133 C M 0.386929 0.511373 0.101698 -> 0.511373 
 134 R E 0.036518 0.430046 0.533436 -> 0.533436 
 135 Q E 0.031291 0.323280 0.645429 -> 0.645429 
 136 E E 0.014024 0.144538 0.841438 -> 0.841438 
 137 D E 0.013433 0.122562 0.864006 -> 0.864006 
 138 G B 0.380889 0.362568 0.256543 -> 0.380889 
 139 W B 0.640045 0.317151 0.042804 -> 0.640045 
 140 Q M 0.125350 0.618517 0.256132 -> 0.618517 
 141 I B 0.745441 0.243933 0.010626 -> 0.745441 
 142 Q M 0.116590 0.568670 0.314740 -> 0.568670 
 143 S M 0.259883 0.397551 0.342566 -> 0.397551 
 144 L B 0.605563 0.359192 0.035245 -> 0.605563 
 145 S E 0.081555 0.329879 0.588566 -> 0.588566 
 146 A M 0.299667 0.453682 0.246651 -> 0.453682 
 147 P E 0.021490 0.145279 0.833230 -> 0.833230 
 148 A E 0.070587 0.241025 0.688388 -> 0.688388 
 149 L M 0.446383 0.453503 0.100114 -> 0.453503 
 150 S E 0.099656 0.270765 0.629579 -> 0.629579 
 151 L M 0.226030 0.515100 0.258870 -> 0.515100 
 152 E E 0.010564 0.214034 0.775402 -> 0.775402 
 153 S E 0.051909 0.252116 0.695975 -> 0.695975 
 154 G E 0.151481 0.296374 0.552145 -> 0.552145 
 155 E E 0.072263 0.422586 0.505151 -> 0.505151 
 156 V B 0.470217 0.367124 0.162659 -> 0.470217 
 157 M M 0.310783 0.453409 0.235808 -> 0.453409 
 158 R E 0.053494 0.400474 0.546033 -> 0.546033 
 159 L B 0.445100 0.435761 0.119139 -> 0.445100 
 160 S M 0.222539 0.491748 0.285714 -> 0.491748 
 161 K E 0.008934 0.185361 0.805705 -> 0.805705 
 162 E E 0.015485 0.143813 0.840703 -> 0.840703 
 163 E E 0.024748 0.274301 0.700951 -> 0.700951 
 164 S E 0.166950 0.407077 0.425973 -> 0.425973 
 165 R M 0.061378 0.479081 0.459540 -> 0.479081 
 166 K E 0.007180 0.151241 0.841579 -> 0.841579 
 167 T E 0.022228 0.217139 0.760633 -> 0.760633 
 168 S M 0.237884 0.428217 0.333899 -> 0.428217 
 169 E E 0.029724 0.304110 0.666166 -> 0.666166 
 170 Q E 0.011950 0.247879 0.740171 -> 0.740171 
 171 S E 0.033000 0.238674 0.728326 -> 0.728326 
 172 V E 0.121570 0.377286 0.501144 -> 0.501144 
 173 L M 0.170421 0.443121 0.386457 -> 0.443121 
 174 K E 0.003080 0.068589 0.928331 -> 0.928331 
 175 A E 0.001572 0.023702 0.974726 -> 0.974726 
