# Supplementary material for: AcconPred: Predicting Solvent Accessibility and Contact Number Simultaneously by a Multitask Learning Framework under the Conditional Neural Fields Model
Source: Biomed Res Int. 2015 Aug 3;2015:678764. doi: 10.1155/2015/678764 (PMC4538422; doi:10.1155/2015/678764)
Supplement: Supplementary file 1 — Training/testing dataset as well as the CASP11 evaluation dataset could be found in the Supplementary Material. The CASP11 evaluation dataset contains all detailed results from SPINE-X, SANN, ACCpro5 and AcconPred. [file 678764.f1.zip › Supplmentary_Files/105_casp11_domain/casp11_domain_AcconPred/T0782-D1.reso]

# AcconPred: three-state solvent accessibility prediction results 
# probabilities are in the order of B (Bury, pACC: 0-10), M (Medium, pACC: 11-40) and E (Exposed, pACC: 41-100), 
# where pACC is the relative solvent accessibility value calculated by DSSP 
# output format: <position> <one letter amino acid> <predicted label> ... <probabilities> ... -> <maximal probability> 

 1 G E 0.023719 0.077258 0.899024 -> 0.899024 
 2 D E 0.003811 0.107699 0.888490 -> 0.888490 
 3 L M 0.252703 0.404386 0.342911 -> 0.404386 
 4 A E 0.038638 0.290860 0.670501 -> 0.670501 
 5 G E 0.184844 0.318889 0.496267 -> 0.496267 
 6 K M 0.035729 0.483817 0.480454 -> 0.483817 
 7 W B 0.698529 0.256102 0.045369 -> 0.698529 
 8 Q B 0.462038 0.454793 0.083169 -> 0.462038 
 9 L B 0.840765 0.149345 0.009890 -> 0.840765 
 10 R M 0.120127 0.690080 0.189793 -> 0.690080 
 11 Q M 0.256779 0.528934 0.214286 -> 0.528934 
 12 Y B 0.552923 0.413914 0.033163 -> 0.552923 
 13 Q M 0.079007 0.513800 0.407192 -> 0.513800 
 14 Y M 0.173261 0.586620 0.240119 -> 0.586620 
 15 A E 0.092864 0.348494 0.558642 -> 0.558642 
 16 D E 0.005017 0.071665 0.923317 -> 0.923317 
 17 G E 0.045867 0.262057 0.692076 -> 0.692076 
 18 T E 0.011960 0.139712 0.848328 -> 0.848328 
 19 S M 0.093063 0.466032 0.440905 -> 0.466032 
 20 E E 0.015073 0.229081 0.755845 -> 0.755845 
 21 K E 0.002893 0.124329 0.872778 -> 0.872778 
 22 V M 0.171949 0.528781 0.299270 -> 0.528781 
 23 D E 0.046073 0.453318 0.500609 -> 0.500609 
 24 S B 0.468418 0.440193 0.091389 -> 0.468418 
 25 V B 0.840467 0.146789 0.012743 -> 0.840467 
 26 F B 0.841305 0.143897 0.014798 -> 0.841305 
 27 Y B 0.860133 0.118639 0.021228 -> 0.860133 
 28 N B 0.877625 0.105271 0.017104 -> 0.877625 
 29 F B 0.941446 0.047131 0.011423 -> 0.941446 
 30 Q B 0.777297 0.190689 0.032014 -> 0.777297 
 31 K B 0.447525 0.412192 0.140283 -> 0.447525 
 32 G B 0.541334 0.378131 0.080535 -> 0.541334 
 33 S B 0.855184 0.120277 0.024539 -> 0.855184 
 34 F B 0.852741 0.115252 0.032007 -> 0.852741 
 35 S B 0.648863 0.315154 0.035983 -> 0.648863 
 36 A B 0.951856 0.038092 0.010052 -> 0.951856 
 37 I M 0.458345 0.498356 0.043299 -> 0.498356 
 38 C B 0.691523 0.279578 0.028899 -> 0.691523 
 39 L M 0.239173 0.527985 0.232842 -> 0.527985 
 40 L E 0.216598 0.358063 0.425340 -> 0.425340 
 41 K E 0.030444 0.254152 0.715404 -> 0.715404 
 42 D E 0.022598 0.116568 0.860834 -> 0.860834 
 43 G E 0.078446 0.292640 0.628914 -> 0.628914 
 44 G E 0.121825 0.291146 0.587029 -> 0.587029 
 45 L M 0.191008 0.610650 0.198342 -> 0.610650 
 46 T M 0.266744 0.422097 0.311159 -> 0.422097 
 47 T M 0.390562 0.451606 0.157833 -> 0.451606 
 48 F B 0.806080 0.182129 0.011791 -> 0.806080 
 49 F M 0.482980 0.484438 0.032582 -> 0.484438 
 50 G B 0.911722 0.079458 0.008820 -> 0.911722 
 51 N B 0.468432 0.461324 0.070243 -> 0.468432 
 52 Y B 0.771419 0.213708 0.014873 -> 0.771419 
 53 S M 0.114367 0.515647 0.369987 -> 0.515647 
 54 L M 0.336761 0.581221 0.082019 -> 0.581221 
 55 K E 0.001735 0.072403 0.925861 -> 0.925861 
 56 G E 0.026658 0.125429 0.847913 -> 0.847913 
 57 A M 0.136322 0.512992 0.350686 -> 0.512992 
 58 E E 0.009674 0.205420 0.784906 -> 0.784906 
 59 I B 0.601790 0.365112 0.033098 -> 0.601790 
 60 S M 0.109618 0.451933 0.438449 -> 0.451933 
 61 I B 0.573470 0.383946 0.042585 -> 0.573470 
 62 I M 0.112078 0.493223 0.394699 -> 0.493223 
 63 L B 0.615664 0.329091 0.055245 -> 0.615664 
 64 L M 0.186948 0.535670 0.277382 -> 0.535670 
 65 P M 0.219396 0.431907 0.348698 -> 0.431907 
 66 E E 0.028780 0.192231 0.778989 -> 0.778989 
 67 S E 0.078738 0.244596 0.676667 -> 0.676667 
 68 V B 0.558703 0.350809 0.090488 -> 0.558703 
 69 N E 0.076478 0.399606 0.523916 -> 0.523916 
 70 D M 0.177159 0.571754 0.251087 -> 0.571754 
 71 K E 0.008529 0.185772 0.805699 -> 0.805699 
 72 N E 0.015424 0.132456 0.852120 -> 0.852120 
 73 Y M 0.222309 0.664282 0.113409 -> 0.664282 
 74 D B 0.596507 0.282938 0.120555 -> 0.596507 
 75 T M 0.120161 0.472963 0.406876 -> 0.472963 
 76 Y M 0.150421 0.551182 0.298397 -> 0.551182 
 77 F B 0.544422 0.371044 0.084533 -> 0.544422 
 78 G B 0.459066 0.301980 0.238955 -> 0.459066 
 79 W B 0.726710 0.251205 0.022085 -> 0.726710 
 80 P E 0.031257 0.262955 0.705787 -> 0.705787 
 81 E E 0.011805 0.202623 0.785572 -> 0.785572 
 82 G M 0.321441 0.466649 0.211910 -> 0.466649 
 83 K E 0.002695 0.097385 0.899919 -> 0.899919 
 84 C M 0.178934 0.615135 0.205931 -> 0.615135 
 85 T E 0.028727 0.416691 0.554582 -> 0.554582 
 86 F B 0.821148 0.173862 0.004991 -> 0.821148 
 87 K E 0.010063 0.350024 0.639913 -> 0.639913 
 88 V B 0.589066 0.390580 0.020354 -> 0.589066 
 89 E M 0.151923 0.666328 0.181750 -> 0.666328 
 90 D E 0.016914 0.229411 0.753675 -> 0.753675 
 91 L M 0.413521 0.503584 0.082895 -> 0.503584 
 92 S E 0.023173 0.239951 0.736876 -> 0.736876 
 93 Y E 0.028166 0.294797 0.677036 -> 0.677036 
 94 S M 0.112503 0.487348 0.400148 -> 0.487348 
 95 S M 0.226280 0.652901 0.120819 -> 0.652901 
 96 L B 0.821078 0.171776 0.007147 -> 0.821078 
 97 R M 0.111463 0.786300 0.102237 -> 0.786300 
 98 L B 0.958026 0.039636 0.002338 -> 0.958026 
 99 E M 0.051215 0.592660 0.356125 -> 0.592660 
 100 Y M 0.283054 0.634888 0.082058 -> 0.634888 
 101 E E 0.002914 0.084664 0.912422 -> 0.912422 
 102 G E 0.034878 0.297053 0.668069 -> 0.668069 
 103 T B 0.587271 0.339554 0.073175 -> 0.587271 
 104 K M 0.099473 0.668570 0.231957 -> 0.668570 
 105 S B 0.876522 0.109627 0.013850 -> 0.876522 
 106 I M 0.238292 0.660001 0.101707 -> 0.660001 
 107 F B 0.823558 0.158799 0.017643 -> 0.823558 
 108 R M 0.056537 0.553620 0.389843 -> 0.553620 
 109 K E 0.035016 0.264355 0.700629 -> 0.700629 
 110 F E 0.010630 0.267883 0.721488 -> 0.721488 
