# Supplementary material for: AcconPred: Predicting Solvent Accessibility and Contact Number Simultaneously by a Multitask Learning Framework under the Conditional Neural Fields Model
Source: Biomed Res Int. 2015 Aug 3;2015:678764. doi: 10.1155/2015/678764 (PMC4538422; doi:10.1155/2015/678764)
Supplement: Supplementary file 1 — Training/testing dataset as well as the CASP11 evaluation dataset could be found in the Supplementary Material. The CASP11 evaluation dataset contains all detailed results from SPINE-X, SANN, ACCpro5 and AcconPred. [file 678764.f1.zip › Supplmentary_Files/105_casp11_domain/casp11_domain_AcconPred/T0783-D1.reso]

# AcconPred: three-state solvent accessibility prediction results 
# probabilities are in the order of B (Bury, pACC: 0-10), M (Medium, pACC: 11-40) and E (Exposed, pACC: 41-100), 
# where pACC is the relative solvent accessibility value calculated by DSSP 
# output format: <position> <one letter amino acid> <predicted label> ... <probabilities> ... -> <maximal probability> 

 1 S E 0.001643 0.020067 0.978290 -> 0.978290 
 2 M E 0.020393 0.194661 0.784946 -> 0.784946 
 3 H E 0.029176 0.373570 0.597254 -> 0.597254 
 4 P E 0.053160 0.352141 0.594699 -> 0.594699 
 5 Q E 0.023794 0.381095 0.595111 -> 0.595111 
 6 A M 0.238453 0.507315 0.254232 -> 0.507315 
 7 V B 0.853908 0.138542 0.007550 -> 0.853908 
 8 A B 0.905557 0.091293 0.003150 -> 0.905557 
 9 A B 0.980698 0.018750 0.000552 -> 0.980698 
 10 V B 0.970086 0.029284 0.000630 -> 0.970086 
 11 L B 0.979269 0.018890 0.001840 -> 0.979269 
 12 P B 0.927581 0.069266 0.003154 -> 0.927581 
 13 A B 0.934832 0.064028 0.001140 -> 0.934832 
 14 G B 0.573633 0.350496 0.075872 -> 0.573633 
 15 G M 0.284130 0.480692 0.235178 -> 0.480692 
 16 C M 0.194528 0.524321 0.281151 -> 0.524321 
 17 G B 0.452132 0.358070 0.189798 -> 0.452132 
 18 E E 0.049628 0.309126 0.641245 -> 0.641245 
 19 R M 0.407113 0.463315 0.129572 -> 0.463315 
 20 M B 0.458717 0.386301 0.154981 -> 0.458717 
 21 G E 0.097374 0.344863 0.557763 -> 0.557763 
 22 V M 0.129872 0.456446 0.413682 -> 0.456446 
 23 P E 0.010008 0.078118 0.911874 -> 0.911874 
 24 T M 0.151103 0.611309 0.237589 -> 0.611309 
 25 P M 0.148119 0.535984 0.315898 -> 0.535984 
 26 K B 0.411401 0.409580 0.179020 -> 0.411401 
 27 Q M 0.284986 0.505939 0.209075 -> 0.505939 
 28 F B 0.718747 0.254957 0.026296 -> 0.718747 
 29 C B 0.700262 0.284885 0.014852 -> 0.700262 
 30 P E 0.064263 0.384247 0.551490 -> 0.551490 
 31 I B 0.609467 0.352844 0.037689 -> 0.609467 
 32 L M 0.087661 0.533826 0.378513 -> 0.533826 
 33 E E 0.003678 0.136679 0.859642 -> 0.859642 
 34 R M 0.081285 0.717301 0.201414 -> 0.717301 
 35 P B 0.477440 0.405901 0.116660 -> 0.477440 
 36 L B 0.941353 0.050531 0.008116 -> 0.941353 
 37 I B 0.923119 0.072173 0.004708 -> 0.923119 
 38 S B 0.513350 0.438198 0.048452 -> 0.513350 
 39 Y M 0.376779 0.540282 0.082940 -> 0.540282 
 40 T B 0.981130 0.014959 0.003910 -> 0.981130 
 41 L B 0.938144 0.060524 0.001332 -> 0.938144 
 42 Q M 0.051736 0.696630 0.251634 -> 0.696630 
 43 A B 0.556841 0.432852 0.010307 -> 0.556841 
 44 L B 0.991034 0.007568 0.001398 -> 0.991034 
 45 E M 0.021445 0.509194 0.469362 -> 0.509194 
 46 R E 0.001285 0.037986 0.960729 -> 0.960729 
 47 V B 0.655883 0.327384 0.016733 -> 0.655883 
 48 C E 0.060696 0.293144 0.646160 -> 0.646160 
 49 W M 0.161616 0.482055 0.356329 -> 0.482055 
 50 I B 0.500669 0.425122 0.074209 -> 0.500669 
 51 K E 0.001552 0.119949 0.878499 -> 0.878499 
 52 D M 0.122082 0.770386 0.107532 -> 0.770386 
 53 I B 0.995929 0.003892 0.000179 -> 0.995929 
 54 V B 0.977061 0.022759 0.000180 -> 0.977061 
 55 V B 0.992638 0.005500 0.001863 -> 0.992638 
 56 A B 0.935641 0.055885 0.008474 -> 0.935641 
 57 V B 0.888265 0.105443 0.006292 -> 0.888265 
 58 T M 0.464776 0.479645 0.055579 -> 0.479645 
 59 G M 0.226302 0.470236 0.303462 -> 0.470236 
 60 E E 0.007635 0.150656 0.841709 -> 0.841709 
 61 N M 0.371967 0.539237 0.088795 -> 0.539237 
 62 M M 0.208965 0.586147 0.204887 -> 0.586147 
 63 E E 0.002742 0.093834 0.903425 -> 0.903425 
 64 V M 0.292883 0.622242 0.084875 -> 0.622242 
 65 M B 0.832155 0.155121 0.012723 -> 0.832155 
 66 K E 0.007658 0.265739 0.726603 -> 0.726603 
 67 S E 0.022493 0.417405 0.560101 -> 0.560101 
 68 I B 0.686746 0.301931 0.011323 -> 0.686746 
 69 I M 0.420592 0.527414 0.051994 -> 0.527414 
 70 Q E 0.002466 0.051205 0.946329 -> 0.946329 
 71 K E 0.002637 0.138658 0.858705 -> 0.858705 
 72 Y M 0.315911 0.635070 0.049019 -> 0.635070 
 73 Q E 0.008347 0.109539 0.882114 -> 0.882114 
 74 H M 0.187107 0.662022 0.150870 -> 0.662022 
 75 K E 0.022727 0.188105 0.789168 -> 0.789168 
 76 R E 0.058725 0.403685 0.537590 -> 0.537590 
 77 I B 0.471027 0.470487 0.058486 -> 0.471027 
 78 S E 0.130619 0.432072 0.437309 -> 0.437309 
 79 L M 0.203650 0.566810 0.229540 -> 0.566810 
 80 V M 0.166531 0.489608 0.343862 -> 0.489608 
 81 E E 0.064967 0.280776 0.654256 -> 0.654256 
 82 A E 0.193180 0.359662 0.447158 -> 0.447158 
 83 G E 0.094908 0.362559 0.542533 -> 0.542533 
 84 V E 0.136443 0.365526 0.498031 -> 0.498031 
 85 T E 0.109970 0.326410 0.563620 -> 0.563620 
 86 R M 0.160716 0.571822 0.267463 -> 0.571822 
 87 H B 0.663384 0.243192 0.093424 -> 0.663384 
 88 R M 0.311965 0.521115 0.166920 -> 0.521115 
 89 S B 0.789379 0.163837 0.046784 -> 0.789379 
 90 I B 0.878683 0.100176 0.021141 -> 0.878683 
 91 F B 0.705157 0.258263 0.036581 -> 0.705157 
 92 N B 0.573426 0.376656 0.049918 -> 0.573426 
 93 G B 0.972196 0.022311 0.005494 -> 0.972196 
 94 L B 0.647916 0.337440 0.014644 -> 0.647916 
 95 K E 0.026135 0.377027 0.596838 -> 0.596838 
 96 A B 0.554508 0.375877 0.069616 -> 0.554508 
 97 L B 0.820405 0.168334 0.011261 -> 0.820405 
 98 A M 0.096699 0.508350 0.394951 -> 0.508350 
 99 E E 0.016201 0.179900 0.803899 -> 0.803899 
 100 D E 0.060291 0.322468 0.617241 -> 0.617241 
 101 Q E 0.092032 0.401152 0.506816 -> 0.506816 
 102 I M 0.331315 0.417092 0.251593 -> 0.417092 
 103 N E 0.077250 0.349030 0.573720 -> 0.573720 
 104 S E 0.223994 0.336975 0.439030 -> 0.439030 
 105 K E 0.040116 0.260893 0.698991 -> 0.698991 
 106 L B 0.460018 0.442698 0.097284 -> 0.460018 
 107 S E 0.269738 0.358126 0.372136 -> 0.372136 
 108 K E 0.064368 0.427553 0.508079 -> 0.508079 
 109 P B 0.459600 0.342073 0.198328 -> 0.459600 
 110 E M 0.381448 0.522517 0.096035 -> 0.522517 
 111 V B 0.848276 0.146291 0.005433 -> 0.848276 
 112 V B 0.982444 0.016407 0.001149 -> 0.982444 
 113 I B 0.980402 0.017419 0.002180 -> 0.980402 
 114 I B 0.808113 0.182536 0.009351 -> 0.808113 
 115 H B 0.768041 0.218567 0.013392 -> 0.768041 
 116 D M 0.393006 0.521559 0.085435 -> 0.521559 
 117 A B 0.873108 0.106046 0.020845 -> 0.873108 
 118 V B 0.569067 0.367695 0.063237 -> 0.569067 
 119 R M 0.217557 0.531257 0.251186 -> 0.531257 
 120 P B 0.677446 0.232183 0.090372 -> 0.677446 
 121 F B 0.784681 0.200898 0.014421 -> 0.784681 
 122 V B 0.777665 0.211765 0.010571 -> 0.777665 
 123 E M 0.043634 0.502502 0.453864 -> 0.502502 
 124 E M 0.062100 0.567031 0.370868 -> 0.567031 
 125 G E 0.060436 0.276823 0.662742 -> 0.662742 
 126 V B 0.544069 0.433041 0.022891 -> 0.544069 
 127 L B 0.962104 0.033939 0.003956 -> 0.962104 
 128 L M 0.154495 0.737972 0.107533 -> 0.737972 
 129 K E 0.014507 0.357074 0.628420 -> 0.628420 
 130 V B 0.995955 0.003037 0.001008 -> 0.995955 
 131 V B 0.971668 0.027216 0.001116 -> 0.971668 
 132 T M 0.024262 0.488201 0.487538 -> 0.488201 
 133 A M 0.301493 0.645423 0.053083 -> 0.645423 
 134 A B 0.943680 0.052690 0.003630 -> 0.943680 
 135 K E 0.007438 0.162809 0.829753 -> 0.829753 
 136 E E 0.001996 0.038527 0.959477 -> 0.959477 
 137 H M 0.082737 0.605486 0.311777 -> 0.605486 
 138 G E 0.038021 0.298905 0.663074 -> 0.663074 
 139 A B 0.696241 0.256579 0.047180 -> 0.696241 
 140 A B 0.820358 0.170160 0.009482 -> 0.820358 
 141 G B 0.853064 0.142916 0.004020 -> 0.853064 
 142 A B 0.915924 0.072385 0.011691 -> 0.915924 
 143 I B 0.870965 0.123633 0.005402 -> 0.870965 
 144 R B 0.480053 0.458868 0.061080 -> 0.480053 
 145 P M 0.364324 0.448840 0.186836 -> 0.448840 
 146 L B 0.482408 0.420127 0.097465 -> 0.482408 
 147 V E 0.042266 0.297252 0.660483 -> 0.660483 
 148 S E 0.083494 0.397184 0.519322 -> 0.519322 
 149 T E 0.235816 0.372484 0.391700 -> 0.391700 
 150 V B 0.456424 0.435483 0.108094 -> 0.456424 
 151 V M 0.221428 0.576142 0.202430 -> 0.576142 
 152 S M 0.138202 0.584425 0.277373 -> 0.584425 
 153 P E 0.047276 0.313192 0.639532 -> 0.639532 
 154 S M 0.190554 0.624221 0.185225 -> 0.624221 
 155 A E 0.028172 0.098191 0.873637 -> 0.873637 
 156 D E 0.008510 0.061493 0.929997 -> 0.929997 
 157 G E 0.077819 0.303731 0.618450 -> 0.618450 
 158 C M 0.244402 0.531676 0.223922 -> 0.531676 
 159 L B 0.433551 0.413719 0.152730 -> 0.433551 
 160 D M 0.118795 0.527659 0.353547 -> 0.527659 
 161 Y M 0.153171 0.564431 0.282399 -> 0.564431 
 162 S M 0.389556 0.450334 0.160110 -> 0.450334 
 163 L B 0.459776 0.439358 0.100866 -> 0.459776 
 164 E M 0.212889 0.462076 0.325035 -> 0.462076 
 165 R M 0.133607 0.621551 0.244842 -> 0.621551 
 166 A E 0.122694 0.209118 0.668188 -> 0.668188 
 167 R M 0.074370 0.467027 0.458603 -> 0.467027 
 168 H B 0.654228 0.287677 0.058095 -> 0.654228 
 169 R M 0.275070 0.551560 0.173370 -> 0.551560 
 170 A B 0.396253 0.354700 0.249046 -> 0.396253 
 171 S B 0.474725 0.289570 0.235705 -> 0.474725 
 172 E B 0.431801 0.389412 0.178786 -> 0.431801 
 173 M B 0.620288 0.309084 0.070628 -> 0.620288 
 174 P B 0.472608 0.295563 0.231829 -> 0.472608 
 175 Q M 0.207647 0.518675 0.273678 -> 0.518675 
 176 A B 0.775426 0.180427 0.044147 -> 0.775426 
 177 F B 0.684053 0.301537 0.014410 -> 0.684053 
 178 L M 0.196183 0.590133 0.213684 -> 0.590133 
 179 F B 0.491469 0.487244 0.021287 -> 0.491469 
 180 D E 0.032387 0.181929 0.785684 -> 0.785684 
 181 V M 0.284645 0.638076 0.077279 -> 0.638076 
 182 I B 0.991505 0.005407 0.003088 -> 0.991505 
 183 Y M 0.098148 0.766266 0.135586 -> 0.766266 
 184 E E 0.005123 0.154963 0.839914 -> 0.839914 
 185 A B 0.867095 0.128262 0.004643 -> 0.867095 
 186 Y B 0.606568 0.384889 0.008543 -> 0.606568 
 187 Q E 0.010070 0.168515 0.821415 -> 0.821415 
 188 Q E 0.012602 0.365333 0.622065 -> 0.622065 
 189 C B 0.900512 0.092626 0.006861 -> 0.900512 
 190 S E 0.027810 0.443822 0.528368 -> 0.528368 
 191 D E 0.004254 0.089565 0.906181 -> 0.906181 
 192 Y M 0.098874 0.616400 0.284726 -> 0.616400 
 193 D E 0.035628 0.298580 0.665792 -> 0.665792 
 194 L M 0.417356 0.471694 0.110949 -> 0.471694 
 195 E E 0.055277 0.257749 0.686973 -> 0.686973 
 196 F M 0.297832 0.531247 0.170921 -> 0.531247 
 197 G B 0.556530 0.356488 0.086982 -> 0.556530 
 198 T E 0.144551 0.409261 0.446188 -> 0.446188 
 199 E E 0.060962 0.407061 0.531977 -> 0.531977 
 200 C B 0.916405 0.066046 0.017549 -> 0.916405 
 201 L B 0.845269 0.146890 0.007841 -> 0.845269 
 202 Q M 0.151710 0.516312 0.331978 -> 0.516312 
 203 L B 0.511944 0.374754 0.113302 -> 0.511944 
 204 A B 0.942648 0.045835 0.011516 -> 0.942648 
 205 L B 0.772549 0.196239 0.031212 -> 0.772549 
 206 K E 0.008768 0.191111 0.800121 -> 0.800121 
 207 Y M 0.178366 0.574768 0.246867 -> 0.574768 
 208 C B 0.513921 0.406284 0.079795 -> 0.513921 
 209 C E 0.092134 0.208629 0.699237 -> 0.699237 
 210 T M 0.185599 0.644500 0.169901 -> 0.644500 
 211 K E 0.002278 0.143580 0.854141 -> 0.854141 
 212 A B 0.861621 0.134928 0.003451 -> 0.861621 
 213 K M 0.128736 0.729647 0.141617 -> 0.729647 
 214 L B 0.800964 0.182851 0.016184 -> 0.800964 
 215 V B 0.800135 0.172561 0.027304 -> 0.800135 
 216 E M 0.197841 0.535097 0.267062 -> 0.535097 
 217 G B 0.430845 0.413452 0.155703 -> 0.430845 
 218 S M 0.326045 0.552999 0.120956 -> 0.552999 
 219 P M 0.077988 0.486465 0.435548 -> 0.486465 
 220 D E 0.033321 0.353222 0.613457 -> 0.613457 
 221 L B 0.699459 0.277137 0.023404 -> 0.699459 
 222 W B 0.807319 0.177708 0.014973 -> 0.807319 
 223 K E 0.019098 0.350403 0.630499 -> 0.630499 
 224 V B 0.838524 0.153208 0.008268 -> 0.838524 
 225 T M 0.201574 0.622486 0.175940 -> 0.622486 
 226 Y M 0.097500 0.776936 0.125563 -> 0.776936 
 227 K E 0.025311 0.368179 0.606510 -> 0.606510 
 228 R E 0.020122 0.323971 0.655907 -> 0.655907 
 229 D B 0.853956 0.129290 0.016753 -> 0.853956 
 230 L B 0.640139 0.343224 0.016637 -> 0.640139 
 231 Y E 0.009588 0.258818 0.731594 -> 0.731594 
 232 A M 0.224721 0.647564 0.127715 -> 0.647564 
 233 A B 0.990254 0.005196 0.004550 -> 0.990254 
 234 E M 0.175327 0.739322 0.085351 -> 0.739322 
 235 S M 0.034418 0.568047 0.397535 -> 0.568047 
 236 I M 0.385586 0.574961 0.039453 -> 0.574961 
 237 I B 0.643541 0.339611 0.016849 -> 0.643541 
 238 K E 0.004005 0.140258 0.855737 -> 0.855737 
 239 E E 0.005941 0.210577 0.783482 -> 0.783482 
 240 R M 0.043586 0.489040 0.467374 -> 0.489040 
 241 I E 0.019334 0.263209 0.717457 -> 0.717457 
 242 S E 0.002628 0.051759 0.945613 -> 0.945613 
 243 Q E 0.000853 0.028660 0.970487 -> 0.970487 
