# Supplementary material for: AcconPred: Predicting Solvent Accessibility and Contact Number Simultaneously by a Multitask Learning Framework under the Conditional Neural Fields Model
Source: Biomed Res Int. 2015 Aug 3;2015:678764. doi: 10.1155/2015/678764 (PMC4538422; doi:10.1155/2015/678764)
Supplement: Supplementary file 1 — Training/testing dataset as well as the CASP11 evaluation dataset could be found in the Supplementary Material. The CASP11 evaluation dataset contains all detailed results from SPINE-X, SANN, ACCpro5 and AcconPred. [file 678764.f1.zip › Supplmentary_Files/105_casp11_domain/casp11_domain_AcconPred/T0783-D2.reso]

# AcconPred: three-state solvent accessibility prediction results 
# probabilities are in the order of B (Bury, pACC: 0-10), M (Medium, pACC: 11-40) and E (Exposed, pACC: 41-100), 
# where pACC is the relative solvent accessibility value calculated by DSSP 
# output format: <position> <one letter amino acid> <predicted label> ... <probabilities> ... -> <maximal probability> 

 1 E E 0.007282 0.063471 0.929247 -> 0.929247 
 2 I M 0.192205 0.625533 0.182263 -> 0.625533 
 3 C B 0.670976 0.282559 0.046464 -> 0.670976 
 4 V B 0.504012 0.333375 0.162613 -> 0.504012 
 5 V B 0.614461 0.297869 0.087670 -> 0.614461 
 6 M B 0.601721 0.312328 0.085951 -> 0.601721 
 7 D M 0.260970 0.504227 0.234802 -> 0.504227 
 8 T M 0.226505 0.508446 0.265049 -> 0.508446 
 9 E E 0.024129 0.220574 0.755298 -> 0.755298 
 10 E E 0.017429 0.154626 0.827945 -> 0.827945 
 11 D M 0.150835 0.534039 0.315126 -> 0.534039 
 12 N M 0.178023 0.466133 0.355844 -> 0.466133 
 13 K E 0.010984 0.131294 0.857722 -> 0.857722 
 14 H M 0.099608 0.544582 0.355810 -> 0.544582 
 15 V B 0.768935 0.192803 0.038262 -> 0.768935 
 16 G B 0.507422 0.315549 0.177029 -> 0.507422 
 17 H E 0.043808 0.407238 0.548953 -> 0.548953 
 18 L B 0.578892 0.373905 0.047203 -> 0.578892 
 19 L B 0.906338 0.077228 0.016434 -> 0.906338 
 20 E M 0.095112 0.652241 0.252647 -> 0.652241 
 21 E E 0.031489 0.392561 0.575951 -> 0.575951 
 22 V B 0.615375 0.340125 0.044500 -> 0.615375 
 23 L B 0.855839 0.123035 0.021126 -> 0.855839 
 24 K E 0.002938 0.204273 0.792789 -> 0.792789 
 25 S E 0.030985 0.279389 0.689626 -> 0.689626 
 26 E M 0.336279 0.512419 0.151302 -> 0.512419 
 27 L B 0.514930 0.426957 0.058113 -> 0.514930 
 28 N E 0.011492 0.176196 0.812312 -> 0.812312 
 29 H M 0.123581 0.468164 0.408254 -> 0.468164 
 30 V B 0.634039 0.311486 0.054475 -> 0.634039 
 31 K E 0.010433 0.159265 0.830301 -> 0.830301 
 32 V M 0.277251 0.464392 0.258357 -> 0.464392 
 33 T M 0.239928 0.448770 0.311302 -> 0.448770 
 34 S M 0.267152 0.417954 0.314893 -> 0.417954 
 35 E E 0.036112 0.247261 0.716627 -> 0.716627 
 36 A E 0.241918 0.337650 0.420432 -> 0.420432 
 37 L B 0.588259 0.370408 0.041333 -> 0.588259 
 38 D E 0.081729 0.281661 0.636610 -> 0.636610 
 39 Q M 0.145399 0.476692 0.377909 -> 0.476692 
 40 C B 0.761315 0.210346 0.028339 -> 0.761315 
 41 Y B 0.535771 0.402413 0.061816 -> 0.535771 
 42 N M 0.380355 0.511305 0.108341 -> 0.511305 
 43 F B 0.832170 0.151876 0.015954 -> 0.832170 
 44 V B 0.893918 0.096787 0.009295 -> 0.893918 
 45 C B 0.860907 0.126611 0.012482 -> 0.860907 
 46 V B 0.886602 0.105310 0.008088 -> 0.886602 
 47 N M 0.332277 0.510933 0.156790 -> 0.510933 
 48 V B 0.706937 0.248700 0.044362 -> 0.706937 
 49 T M 0.175436 0.497808 0.326756 -> 0.497808 
 50 T M 0.142399 0.435673 0.421928 -> 0.435673 
 51 S E 0.130529 0.409779 0.459691 -> 0.459691 
 52 D E 0.041086 0.371347 0.587567 -> 0.587567 
 53 F M 0.402883 0.505637 0.091480 -> 0.505637 
 54 Q E 0.004107 0.067701 0.928192 -> 0.928192 
 55 E M 0.043794 0.527233 0.428973 -> 0.527233 
 56 T B 0.875649 0.104704 0.019647 -> 0.875649 
 57 Q M 0.058955 0.574353 0.366692 -> 0.574353 
 58 K E 0.006550 0.225040 0.768410 -> 0.768410 
 59 L B 0.817911 0.162666 0.019423 -> 0.817911 
 60 L B 0.815370 0.170324 0.014306 -> 0.815370 
 61 S M 0.113074 0.509200 0.377726 -> 0.509200 
 62 M M 0.359362 0.505452 0.135186 -> 0.505452 
 63 L B 0.756100 0.221509 0.022390 -> 0.756100 
 64 E E 0.033930 0.445845 0.520225 -> 0.520225 
 65 E E 0.008067 0.127191 0.864741 -> 0.864741 
 66 S M 0.202654 0.477780 0.319566 -> 0.477780 
 67 S E 0.169049 0.372130 0.458822 -> 0.458822 
 68 L M 0.294104 0.472843 0.233053 -> 0.472843 
 69 C B 0.391443 0.330091 0.278466 -> 0.391443 
 70 I B 0.429221 0.405174 0.165606 -> 0.429221 
 71 L B 0.575846 0.297049 0.127104 -> 0.575846 
 72 Y B 0.525335 0.396594 0.078071 -> 0.525335 
 73 P B 0.584633 0.336928 0.078439 -> 0.584633 
 74 V B 0.858304 0.125696 0.015999 -> 0.858304 
 75 V B 0.915056 0.077198 0.007746 -> 0.915056 
 76 V B 0.922630 0.072791 0.004579 -> 0.922630 
 77 V B 0.955770 0.040935 0.003295 -> 0.955770 
 78 S B 0.811719 0.175036 0.013245 -> 0.811719 
 79 V B 0.962784 0.034222 0.002994 -> 0.962784 
 80 H M 0.421792 0.520981 0.057227 -> 0.520981 
 81 F B 0.819417 0.161963 0.018620 -> 0.819417 
 82 L M 0.434105 0.490982 0.074913 -> 0.490982 
 83 D E 0.067891 0.428640 0.503469 -> 0.503469 
 84 F M 0.386381 0.498782 0.114837 -> 0.498782 
 85 K E 0.007061 0.137543 0.855396 -> 0.855396 
 86 L E 0.082039 0.354310 0.563651 -> 0.563651 
 87 V M 0.309416 0.542547 0.148037 -> 0.542547 
 88 P E 0.079896 0.334979 0.585125 -> 0.585125 
 89 P E 0.089926 0.332965 0.577109 -> 0.577109 
 90 S E 0.066335 0.268280 0.665385 -> 0.665385 
 91 Q E 0.014314 0.147436 0.838249 -> 0.838249 
 92 K E 0.019430 0.290736 0.689834 -> 0.689834 
 93 M B 0.433464 0.419754 0.146782 -> 0.433464 
 94 E E 0.019622 0.236261 0.744117 -> 0.744117 
 95 N M 0.085061 0.598815 0.316123 -> 0.598815 
 96 L B 0.617962 0.332102 0.049936 -> 0.617962 
 97 M E 0.095042 0.360190 0.544768 -> 0.544768 
 98 Q M 0.069534 0.638339 0.292126 -> 0.638339 
 99 I B 0.899864 0.074854 0.025282 -> 0.899864 
 100 R M 0.064824 0.694161 0.241015 -> 0.694161 
 101 E E 0.010865 0.217296 0.771839 -> 0.771839 
 102 F B 0.696816 0.292284 0.010900 -> 0.696816 
 103 A B 0.810939 0.172412 0.016649 -> 0.810939 
 104 K E 0.004149 0.094039 0.901812 -> 0.901812 
 105 E E 0.022121 0.468940 0.508939 -> 0.508939 
 106 V B 0.689216 0.286877 0.023907 -> 0.689216 
 107 K E 0.024229 0.367673 0.608098 -> 0.608098 
 108 E E 0.011708 0.222576 0.765716 -> 0.765716 
 109 R M 0.065399 0.588791 0.345809 -> 0.588791 
 110 N M 0.443869 0.467932 0.088198 -> 0.467932 
 111 I B 0.842372 0.123347 0.034282 -> 0.842372 
 112 L B 0.739020 0.198686 0.062294 -> 0.739020 
 113 L B 0.803725 0.149041 0.047234 -> 0.803725 
 114 Y B 0.591854 0.338896 0.069250 -> 0.591854 
 115 G B 0.790749 0.156739 0.052513 -> 0.790749 
 116 L B 0.843114 0.137984 0.018903 -> 0.843114 
 117 L B 0.573698 0.331368 0.094935 -> 0.573698 
 118 I B 0.770237 0.187970 0.041793 -> 0.770237 
 119 S M 0.252846 0.469487 0.277667 -> 0.469487 
 120 Y M 0.363858 0.558840 0.077303 -> 0.558840 
 121 P E 0.059363 0.336007 0.604630 -> 0.604630 
 122 Q E 0.014025 0.155464 0.830512 -> 0.830512 
 123 D E 0.045041 0.362274 0.592685 -> 0.592685 
 124 D M 0.087138 0.525275 0.387587 -> 0.525275 
 125 Q E 0.009574 0.121551 0.868875 -> 0.868875 
 126 K E 0.006787 0.201888 0.791325 -> 0.791325 
 127 L B 0.565897 0.392014 0.042089 -> 0.565897 
 128 Q M 0.071899 0.563300 0.364801 -> 0.563300 
 129 E E 0.009103 0.185328 0.805569 -> 0.805569 
 130 S B 0.475407 0.449684 0.074909 -> 0.475407 
 131 L B 0.655395 0.308335 0.036270 -> 0.655395 
 132 R E 0.021202 0.298675 0.680123 -> 0.680123 
 133 Q M 0.079610 0.566042 0.354349 -> 0.566042 
 134 G B 0.823573 0.153953 0.022474 -> 0.823573 
 135 A B 0.816467 0.148912 0.034620 -> 0.816467 
 136 I M 0.208992 0.480949 0.310059 -> 0.480949 
 137 I B 0.827614 0.116564 0.055822 -> 0.827614 
 138 I B 0.891576 0.092596 0.015827 -> 0.891576 
 139 A B 0.659196 0.257280 0.083524 -> 0.659196 
 140 S B 0.485902 0.399036 0.115061 -> 0.485902 
 141 L B 0.687386 0.282977 0.029638 -> 0.687386 
 142 I M 0.451474 0.478809 0.069717 -> 0.478809 
 143 K E 0.020409 0.264437 0.715153 -> 0.715153 
 144 E E 0.040846 0.245302 0.713852 -> 0.713852 
 145 R M 0.113686 0.525132 0.361182 -> 0.525132 
 146 N E 0.115585 0.433191 0.451225 -> 0.451225 
 147 S E 0.119894 0.279580 0.600526 -> 0.600526 
 148 G E 0.217948 0.301362 0.480690 -> 0.480690 
 149 L B 0.427179 0.339351 0.233470 -> 0.427179 
 150 I B 0.401442 0.330458 0.268100 -> 0.401442 
 151 G B 0.456326 0.221537 0.322137 -> 0.456326 
 152 Q E 0.181934 0.361230 0.456836 -> 0.456836 
 153 L M 0.328224 0.370957 0.300820 -> 0.370957 
 154 L E 0.254194 0.366423 0.379382 -> 0.379382 
 155 I E 0.093650 0.322782 0.583569 -> 0.583569 
 156 A E 0.004497 0.052108 0.943395 -> 0.943395 
