# Supplementary material for: AcconPred: Predicting Solvent Accessibility and Contact Number Simultaneously by a Multitask Learning Framework under the Conditional Neural Fields Model
Source: Biomed Res Int. 2015 Aug 3;2015:678764. doi: 10.1155/2015/678764 (PMC4538422; doi:10.1155/2015/678764)
Supplement: Supplementary file 1 — Training/testing dataset as well as the CASP11 evaluation dataset could be found in the Supplementary Material. The CASP11 evaluation dataset contains all detailed results from SPINE-X, SANN, ACCpro5 and AcconPred. [file 678764.f1.zip › Supplmentary_Files/105_casp11_domain/casp11_domain_AcconPred/T0784-D1.reso]

# AcconPred: three-state solvent accessibility prediction results 
# probabilities are in the order of B (Bury, pACC: 0-10), M (Medium, pACC: 11-40) and E (Exposed, pACC: 41-100), 
# where pACC is the relative solvent accessibility value calculated by DSSP 
# output format: <position> <one letter amino acid> <predicted label> ... <probabilities> ... -> <maximal probability> 

 1 N E 0.002352 0.023938 0.973710 -> 0.973710 
 2 T E 0.010724 0.137470 0.851806 -> 0.851806 
 3 T E 0.012885 0.147512 0.839602 -> 0.839602 
 4 G E 0.105185 0.295748 0.599068 -> 0.599068 
 5 V M 0.228456 0.482242 0.289302 -> 0.482242 
 6 H M 0.079725 0.597470 0.322805 -> 0.597470 
 7 K M 0.071560 0.515590 0.412850 -> 0.515590 
 8 I B 0.797032 0.185013 0.017955 -> 0.797032 
 9 V M 0.441458 0.453897 0.104645 -> 0.453897 
 10 V B 0.741749 0.228918 0.029333 -> 0.741749 
 11 E M 0.071302 0.555541 0.373156 -> 0.555541 
 12 Q E 0.110859 0.418319 0.470822 -> 0.470822 
 13 S E 0.126909 0.429700 0.443391 -> 0.443391 
 14 G E 0.058578 0.287319 0.654103 -> 0.654103 
 15 N E 0.021751 0.211523 0.766726 -> 0.766726 
 16 T M 0.117829 0.515598 0.366573 -> 0.515598 
 17 D E 0.021717 0.230879 0.747403 -> 0.747403 
 18 D E 0.037285 0.374119 0.588596 -> 0.588596 
 19 F B 0.812996 0.178595 0.008409 -> 0.812996 
 20 D M 0.075895 0.569528 0.354576 -> 0.569528 
 21 L B 0.853963 0.140680 0.005358 -> 0.853963 
 22 N M 0.274447 0.580412 0.145142 -> 0.580412 
 23 I B 0.895499 0.096568 0.007932 -> 0.895499 
 24 A B 0.668304 0.264614 0.067083 -> 0.668304 
 25 F B 0.825984 0.150126 0.023890 -> 0.825984 
 26 G B 0.639455 0.273523 0.087022 -> 0.639455 
 27 A B 0.581180 0.288624 0.130196 -> 0.581180 
 28 A M 0.336199 0.436302 0.227499 -> 0.436302 
 29 N E 0.105704 0.411681 0.482615 -> 0.482615 
 30 T E 0.066985 0.309018 0.623998 -> 0.623998 
 31 G E 0.048365 0.182299 0.769336 -> 0.769336 
 32 G E 0.152694 0.357798 0.489508 -> 0.489508 
 33 V M 0.176909 0.413028 0.410063 -> 0.413028 
 34 A B 0.478758 0.361055 0.160187 -> 0.478758 
 35 K E 0.013186 0.325357 0.661457 -> 0.661457 
 36 L B 0.498114 0.444381 0.057505 -> 0.498114 
 37 Y M 0.203383 0.654700 0.141917 -> 0.654700 
 38 N M 0.201109 0.513905 0.284985 -> 0.513905 
 39 E E 0.018803 0.168873 0.812324 -> 0.812324 
 40 N E 0.010581 0.094075 0.895344 -> 0.895344 
 41 G M 0.279159 0.424989 0.295852 -> 0.424989 
 42 E E 0.020816 0.205041 0.774143 -> 0.774143 
 43 Y M 0.129318 0.605129 0.265553 -> 0.605129 
 44 L M 0.359657 0.502509 0.137834 -> 0.502509 
 45 G E 0.154528 0.306742 0.538731 -> 0.538731 
 46 D E 0.063205 0.302428 0.634367 -> 0.634367 
 47 S E 0.242592 0.370688 0.386719 -> 0.386719 
 48 Y M 0.213152 0.545137 0.241711 -> 0.545137 
 49 L M 0.196818 0.438399 0.364783 -> 0.438399 
 50 V B 0.395240 0.389835 0.214924 -> 0.395240 
 51 N E 0.082756 0.395346 0.521897 -> 0.521897 
 52 K E 0.010906 0.246863 0.742231 -> 0.742231 
 53 V B 0.484591 0.454754 0.060655 -> 0.484591 
 54 T E 0.031457 0.404727 0.563816 -> 0.563816 
 55 E E 0.006800 0.133660 0.859540 -> 0.859540 
 56 N M 0.114663 0.590987 0.294351 -> 0.590987 
 57 K E 0.011480 0.203497 0.785023 -> 0.785023 
 58 I B 0.619184 0.341240 0.039576 -> 0.619184 
 59 S E 0.089184 0.440365 0.470451 -> 0.470451 
 60 C B 0.577588 0.400706 0.021707 -> 0.577588 
 61 Q E 0.018849 0.310661 0.670490 -> 0.670490 
 62 T E 0.134360 0.412954 0.452686 -> 0.452686 
 63 G E 0.078073 0.364331 0.557596 -> 0.557596 
 64 K E 0.013385 0.121686 0.864929 -> 0.864929 
 65 E E 0.024283 0.329849 0.645868 -> 0.645868 
 66 G B 0.663656 0.282473 0.053872 -> 0.663656 
 67 S B 0.677931 0.282366 0.039703 -> 0.677931 
 68 M B 0.763551 0.217074 0.019375 -> 0.763551 
 69 M B 0.856484 0.130508 0.013008 -> 0.856484 
 70 T B 0.489357 0.364476 0.146166 -> 0.489357 
 71 C B 0.729896 0.245254 0.024851 -> 0.729896 
 72 A E 0.167038 0.373888 0.459074 -> 0.459074 
 73 G E 0.154080 0.389690 0.456231 -> 0.456231 
 74 S E 0.110496 0.347792 0.541712 -> 0.541712 
 75 V M 0.254122 0.383871 0.362007 -> 0.383871 
 76 I M 0.118044 0.470746 0.411211 -> 0.470746 
 77 S M 0.134701 0.434435 0.430864 -> 0.434435 
 78 T E 0.103343 0.429589 0.467068 -> 0.467068 
 79 S M 0.217423 0.427338 0.355239 -> 0.427338 
 80 E E 0.014067 0.148999 0.836934 -> 0.836934 
 81 Q E 0.018550 0.177038 0.804413 -> 0.804413 
 82 A E 0.148182 0.316789 0.535029 -> 0.535029 
 83 G E 0.064815 0.240501 0.694685 -> 0.694685 
 84 K E 0.017906 0.274112 0.707982 -> 0.707982 
 85 K E 0.009341 0.300878 0.689781 -> 0.689781 
 86 L B 0.827457 0.166503 0.006040 -> 0.827457 
 87 K M 0.057668 0.623042 0.319290 -> 0.623042 
 88 I B 0.928510 0.069436 0.002054 -> 0.928510 
 89 S B 0.589750 0.371853 0.038397 -> 0.589750 
 90 V B 0.874159 0.117787 0.008054 -> 0.874159 
 91 I B 0.767011 0.203585 0.029405 -> 0.767011 
 92 A B 0.870821 0.115442 0.013737 -> 0.870821 
 93 Y M 0.381237 0.562452 0.056311 -> 0.562452 
 94 I B 0.837677 0.145314 0.017010 -> 0.837677 
 95 D M 0.096044 0.555705 0.348251 -> 0.555705 
 96 N E 0.071139 0.409969 0.518893 -> 0.518893 
 97 K E 0.006014 0.079842 0.914143 -> 0.914143 
 98 E E 0.062095 0.446220 0.491685 -> 0.491685 
 99 V B 0.424411 0.416545 0.159044 -> 0.424411 
 100 N E 0.067259 0.360890 0.571851 -> 0.571851 
 101 R E 0.026346 0.417675 0.555979 -> 0.555979 
 102 L B 0.549734 0.367355 0.082911 -> 0.549734 
 103 E M 0.076955 0.511527 0.411517 -> 0.511527 
 104 K E 0.011456 0.196353 0.792191 -> 0.792191 
 105 E E 0.062480 0.443555 0.493965 -> 0.493965 
 106 Y M 0.224369 0.551988 0.223642 -> 0.551988 
 107 I M 0.283995 0.487428 0.228578 -> 0.487428 
 108 T M 0.195285 0.429233 0.375482 -> 0.429233 
 109 K E 0.007912 0.092018 0.900070 -> 0.900070 
 110 G E 0.109995 0.315119 0.574886 -> 0.574886 
 111 S E 0.094839 0.401779 0.503381 -> 0.503381 
 112 T M 0.383440 0.402576 0.213984 -> 0.402576 
 113 L B 0.481091 0.454985 0.063924 -> 0.481091 
 114 V M 0.381577 0.473721 0.144702 -> 0.473721 
 115 E M 0.127276 0.474708 0.398017 -> 0.474708 
 116 N E 0.053017 0.358891 0.588091 -> 0.588091 
 117 F B 0.667143 0.304426 0.028431 -> 0.667143 
 118 S E 0.094162 0.427177 0.478662 -> 0.478662 
 119 V B 0.534648 0.392401 0.072951 -> 0.534648 
 120 S E 0.043966 0.372866 0.583168 -> 0.583168 
 121 T M 0.157919 0.496627 0.345454 -> 0.496627 
 122 T E 0.030190 0.344031 0.625780 -> 0.625780 
 123 S E 0.018932 0.200360 0.780708 -> 0.780708 
 124 V M 0.119759 0.536450 0.343791 -> 0.536450 
 125 E E 0.009531 0.062026 0.928443 -> 0.928443 
