# Supplementary material for: AcconPred: Predicting Solvent Accessibility and Contact Number Simultaneously by a Multitask Learning Framework under the Conditional Neural Fields Model
Source: Biomed Res Int. 2015 Aug 3;2015:678764. doi: 10.1155/2015/678764 (PMC4538422; doi:10.1155/2015/678764)
Supplement: Supplementary file 1 — Training/testing dataset as well as the CASP11 evaluation dataset could be found in the Supplementary Material. The CASP11 evaluation dataset contains all detailed results from SPINE-X, SANN, ACCpro5 and AcconPred. [file 678764.f1.zip › Supplmentary_Files/105_casp11_domain/casp11_domain_AcconPred/T0785-D1.reso]

# AcconPred: three-state solvent accessibility prediction results 
# probabilities are in the order of B (Bury, pACC: 0-10), M (Medium, pACC: 11-40) and E (Exposed, pACC: 41-100), 
# where pACC is the relative solvent accessibility value calculated by DSSP 
# output format: <position> <one letter amino acid> <predicted label> ... <probabilities> ... -> <maximal probability> 

 1 I E 0.007524 0.047931 0.944544 -> 0.944544 
 2 P E 0.012190 0.113192 0.874618 -> 0.874618 
 3 S E 0.015408 0.148917 0.835675 -> 0.835675 
 4 P E 0.017732 0.189299 0.792969 -> 0.792969 
 5 P E 0.032613 0.220170 0.747217 -> 0.747217 
 6 S E 0.025338 0.222586 0.752076 -> 0.752076 
 7 K E 0.007353 0.139883 0.852764 -> 0.852764 
 8 T E 0.059420 0.405563 0.535017 -> 0.535017 
 9 S M 0.202882 0.443196 0.353921 -> 0.443196 
 10 L M 0.332984 0.505278 0.161739 -> 0.505278 
 11 D E 0.015999 0.275163 0.708838 -> 0.708838 
 12 I B 0.549613 0.403295 0.047093 -> 0.549613 
 13 A B 0.665752 0.275494 0.058754 -> 0.665752 
 14 E E 0.008951 0.240665 0.750384 -> 0.750384 
 15 E E 0.016402 0.293065 0.690533 -> 0.690533 
 16 L B 0.693517 0.289290 0.017192 -> 0.693517 
 17 Q E 0.016617 0.312649 0.670734 -> 0.670734 
 18 N E 0.004810 0.068469 0.926721 -> 0.926721 
 19 D E 0.032404 0.414094 0.553502 -> 0.553502 
 20 K E 0.007520 0.104338 0.888141 -> 0.888141 
 21 G E 0.159696 0.304466 0.535838 -> 0.535838 
 22 V B 0.594336 0.359650 0.046014 -> 0.594336 
 23 S M 0.240717 0.458600 0.300683 -> 0.458600 
 24 F B 0.690479 0.283320 0.026201 -> 0.690479 
 25 A B 0.448737 0.417620 0.133643 -> 0.448737 
 26 F B 0.776697 0.198773 0.024529 -> 0.776697 
 27 Q M 0.069935 0.520988 0.409077 -> 0.520988 
 28 A B 0.541085 0.318133 0.140781 -> 0.541085 
 29 R E 0.055419 0.456896 0.487685 -> 0.487685 
 30 E M 0.097013 0.491725 0.411262 -> 0.491725 
 31 E E 0.006871 0.076067 0.917062 -> 0.917062 
 32 E E 0.021569 0.311703 0.666728 -> 0.666728 
 33 L M 0.323291 0.523677 0.153032 -> 0.523677 
 34 G E 0.093114 0.272677 0.634209 -> 0.634209 
 35 A E 0.158364 0.346881 0.494755 -> 0.494755 
 36 F B 0.647389 0.310543 0.042068 -> 0.647389 
 37 T M 0.163226 0.464364 0.372410 -> 0.464364 
 38 K E 0.020627 0.247867 0.731506 -> 0.731506 
 39 R M 0.126628 0.573036 0.300336 -> 0.573036 
 40 T B 0.498565 0.365419 0.136016 -> 0.498565 
 41 L B 0.785927 0.183265 0.030808 -> 0.785927 
 42 F B 0.816564 0.160713 0.022724 -> 0.816564 
 43 A B 0.642130 0.268961 0.088909 -> 0.642130 
 44 Y M 0.436381 0.448449 0.115170 -> 0.448449 
 45 S M 0.290631 0.415002 0.294367 -> 0.415002 
 46 G E 0.176788 0.318402 0.504810 -> 0.504810 
 47 D E 0.034254 0.191189 0.774557 -> 0.774557 
 48 G E 0.119754 0.284342 0.595904 -> 0.595904 
 49 L B 0.460656 0.447834 0.091510 -> 0.460656 
 50 T E 0.035471 0.212048 0.752481 -> 0.752481 
 51 G M 0.213737 0.490536 0.295728 -> 0.490536 
 52 P E 0.040768 0.276276 0.682956 -> 0.682956 
 53 F B 0.639051 0.327882 0.033067 -> 0.639051 
 54 K E 0.010090 0.129878 0.860033 -> 0.860033 
 55 A M 0.263007 0.420601 0.316392 -> 0.420601 
 56 P E 0.079059 0.289883 0.631058 -> 0.631058 
 57 A E 0.143994 0.306094 0.549912 -> 0.549912 
 58 S E 0.103734 0.340871 0.555395 -> 0.555395 
 59 A E 0.064497 0.223564 0.711939 -> 0.711939 
 60 E E 0.022599 0.285944 0.691457 -> 0.691457 
 61 L B 0.605041 0.330086 0.064873 -> 0.605041 
 62 S M 0.160056 0.466917 0.373027 -> 0.466917 
 63 S E 0.058284 0.276762 0.664955 -> 0.664955 
 64 F B 0.556223 0.371620 0.072158 -> 0.556223 
 65 L B 0.591572 0.321407 0.087020 -> 0.591572 
 66 T E 0.148548 0.331345 0.520106 -> 0.520106 
 67 A E 0.247333 0.226565 0.526102 -> 0.526102 
 68 H M 0.128085 0.579179 0.292735 -> 0.579179 
 69 P E 0.137581 0.276279 0.586141 -> 0.586141 
 70 K E 0.016769 0.167657 0.815574 -> 0.815574 
 71 G B 0.423375 0.322696 0.253930 -> 0.423375 
 72 R M 0.129670 0.628074 0.242256 -> 0.628074 
 73 W B 0.770595 0.213686 0.015720 -> 0.770595 
 74 L B 0.842834 0.145152 0.012013 -> 0.842834 
 75 I B 0.927557 0.062951 0.009492 -> 0.927557 
 76 A B 0.792153 0.166979 0.040868 -> 0.792153 
 77 F B 0.873198 0.116715 0.010088 -> 0.873198 
 78 P M 0.374348 0.391005 0.234648 -> 0.391005 
 79 L B 0.502286 0.366443 0.131271 -> 0.502286 
 80 G E 0.111596 0.341893 0.546510 -> 0.546510 
 81 T E 0.109165 0.349671 0.541164 -> 0.541164 
 82 G B 0.365549 0.347854 0.286598 -> 0.365549 
 83 I M 0.379425 0.468901 0.151674 -> 0.468901 
 84 V B 0.549314 0.353082 0.097604 -> 0.549314 
 85 S E 0.157463 0.406724 0.435813 -> 0.435813 
 86 V M 0.446042 0.447694 0.106264 -> 0.447694 
 87 D E 0.028900 0.364432 0.606669 -> 0.606669 
 88 E E 0.016684 0.188458 0.794858 -> 0.794858 
 89 G B 0.415009 0.315990 0.269000 -> 0.415009 
 90 I B 0.549632 0.394487 0.055881 -> 0.549632 
 91 L B 0.742634 0.217429 0.039936 -> 0.742634 
 92 T M 0.312518 0.528191 0.159291 -> 0.528191 
 93 L B 0.848333 0.138872 0.012795 -> 0.848333 
 94 E M 0.042682 0.550674 0.406644 -> 0.550674 
 95 I B 0.674348 0.302687 0.022964 -> 0.674348 
 96 S M 0.168555 0.497408 0.334037 -> 0.497408 
 97 R E 0.050328 0.384381 0.565291 -> 0.565291 
 98 S E 0.048072 0.277574 0.674354 -> 0.674354 
 99 L B 0.486193 0.455790 0.058017 -> 0.486193 
 100 P E 0.076527 0.285539 0.637934 -> 0.637934 
 101 E E 0.009094 0.091445 0.899461 -> 0.899461 
 102 V M 0.201121 0.495313 0.303566 -> 0.495313 
 103 G E 0.078188 0.323284 0.598528 -> 0.598528 
 104 S E 0.029359 0.162864 0.807777 -> 0.807777 
 105 G E 0.060623 0.236602 0.702775 -> 0.702775 
 106 S M 0.149220 0.453154 0.397626 -> 0.453154 
 107 S E 0.174905 0.409077 0.416018 -> 0.416018 
 108 F B 0.570642 0.333400 0.095958 -> 0.570642 
 109 Y M 0.077139 0.572852 0.350008 -> 0.572852 
 110 L B 0.429772 0.429517 0.140711 -> 0.429772 
 111 T E 0.054513 0.375137 0.570350 -> 0.570350 
 112 E E 0.011529 0.078851 0.909620 -> 0.909620 
