# Supplementary material for: AcconPred: Predicting Solvent Accessibility and Contact Number Simultaneously by a Multitask Learning Framework under the Conditional Neural Fields Model
Source: Biomed Res Int. 2015 Aug 3;2015:678764. doi: 10.1155/2015/678764 (PMC4538422; doi:10.1155/2015/678764)
Supplement: Supplementary file 1 — Training/testing dataset as well as the CASP11 evaluation dataset could be found in the Supplementary Material. The CASP11 evaluation dataset contains all detailed results from SPINE-X, SANN, ACCpro5 and AcconPred. [file 678764.f1.zip › Supplmentary_Files/105_casp11_domain/casp11_domain_AcconPred/T0786-D1.reso]

# AcconPred: three-state solvent accessibility prediction results 
# probabilities are in the order of B (Bury, pACC: 0-10), M (Medium, pACC: 11-40) and E (Exposed, pACC: 41-100), 
# where pACC is the relative solvent accessibility value calculated by DSSP 
# output format: <position> <one letter amino acid> <predicted label> ... <probabilities> ... -> <maximal probability> 

 1 D E 0.016999 0.066678 0.916323 -> 0.916323 
 2 I E 0.086239 0.380254 0.533507 -> 0.533507 
 3 L M 0.097563 0.499565 0.402872 -> 0.499565 
 4 A E 0.023410 0.180232 0.796358 -> 0.796358 
 5 T E 0.017866 0.148622 0.833512 -> 0.833512 
 6 E E 0.003737 0.093187 0.903076 -> 0.903076 
 7 G M 0.152552 0.465582 0.381866 -> 0.465582 
 8 S M 0.265166 0.475882 0.258952 -> 0.475882 
 9 I B 0.560092 0.391883 0.048025 -> 0.560092 
 10 I B 0.689681 0.280274 0.030045 -> 0.689681 
 11 W B 0.720387 0.252351 0.027262 -> 0.720387 
 12 L B 0.961721 0.036271 0.002008 -> 0.961721 
 13 K M 0.182377 0.681172 0.136451 -> 0.681172 
 14 N B 0.783975 0.190738 0.025287 -> 0.783975 
 15 K M 0.184674 0.526037 0.289289 -> 0.526037 
 16 F B 0.591540 0.356841 0.051619 -> 0.591540 
 17 P E 0.074402 0.366737 0.558861 -> 0.558861 
 18 T M 0.252165 0.408538 0.339297 -> 0.408538 
 19 L B 0.644558 0.316878 0.038564 -> 0.644558 
 20 K E 0.005164 0.202297 0.792538 -> 0.792538 
 21 D E 0.013062 0.144479 0.842460 -> 0.842460 
 22 T M 0.237964 0.507954 0.254081 -> 0.507954 
 23 F B 0.548298 0.402780 0.048922 -> 0.548298 
 24 Q B 0.536477 0.401026 0.062497 -> 0.536477 
 25 T B 0.642408 0.335142 0.022450 -> 0.642408 
 26 V B 0.945309 0.053475 0.001216 -> 0.945309 
 27 L B 0.962613 0.035836 0.001551 -> 0.962613 
 28 I B 0.950357 0.048595 0.001048 -> 0.950357 
 29 E B 0.746623 0.243371 0.010006 -> 0.746623 
 30 T B 0.751960 0.240955 0.007086 -> 0.751960 
 31 D E 0.026140 0.376988 0.596872 -> 0.596872 
 32 N E 0.013923 0.240773 0.745304 -> 0.745304 
 33 C B 0.540385 0.427599 0.032016 -> 0.540385 
 34 E E 0.023989 0.285216 0.690795 -> 0.690795 
 35 D E 0.022509 0.238784 0.738708 -> 0.738708 
 36 H E 0.023820 0.333103 0.643076 -> 0.643076 
 37 I B 0.627913 0.324917 0.047170 -> 0.627913 
 38 A E 0.131992 0.371085 0.496923 -> 0.496923 
 39 T E 0.007251 0.140476 0.852272 -> 0.852272 
 40 Y M 0.485660 0.501971 0.012369 -> 0.501971 
 41 T E 0.026259 0.380894 0.592847 -> 0.592847 
 42 E E 0.009978 0.281956 0.708066 -> 0.708066 
 43 E E 0.003867 0.098143 0.897991 -> 0.897991 
 44 H M 0.182280 0.737902 0.079818 -> 0.737902 
 45 M B 0.945813 0.050725 0.003462 -> 0.945813 
 46 R M 0.123635 0.735501 0.140864 -> 0.735501 
 47 S M 0.301412 0.578879 0.119708 -> 0.578879 
 48 L B 0.966524 0.030760 0.002716 -> 0.966524 
 49 I B 0.978030 0.017288 0.004682 -> 0.978030 
 50 R M 0.027537 0.586785 0.385678 -> 0.586785 
 51 F B 0.780401 0.204062 0.015538 -> 0.780401 
 52 S B 0.988780 0.008864 0.002356 -> 0.988780 
 53 I B 0.696421 0.292568 0.011011 -> 0.696421 
 54 K E 0.019815 0.366928 0.613258 -> 0.613258 
 55 H B 0.663034 0.328350 0.008616 -> 0.663034 
 56 W B 0.934034 0.058986 0.006980 -> 0.934034 
 57 L M 0.090130 0.612853 0.297017 -> 0.612853 
 58 N E 0.025977 0.403162 0.570861 -> 0.570861 
 59 L B 0.756640 0.226075 0.017285 -> 0.756640 
 60 Q M 0.082866 0.520941 0.396193 -> 0.520941 
 61 K E 0.000974 0.049611 0.949414 -> 0.949414 
 62 N M 0.054761 0.617049 0.328190 -> 0.617049 
 63 E E 0.008184 0.072700 0.919116 -> 0.919116 
 64 E E 0.011241 0.218436 0.770323 -> 0.770323 
 65 F B 0.652333 0.334940 0.012727 -> 0.652333 
 66 T M 0.205612 0.632359 0.162029 -> 0.632359 
 67 S B 0.851773 0.141339 0.006887 -> 0.851773 
 68 V B 0.899269 0.098461 0.002270 -> 0.899269 
 69 I B 0.862519 0.120320 0.017161 -> 0.862519 
 70 L B 0.939655 0.056253 0.004092 -> 0.939655 
 71 Y B 0.857207 0.136566 0.006227 -> 0.857207 
 72 K M 0.464770 0.489780 0.045449 -> 0.489780 
 73 N B 0.771859 0.209706 0.018434 -> 0.771859 
 74 H M 0.255496 0.606107 0.138398 -> 0.606107 
 75 G B 0.639120 0.289405 0.071475 -> 0.639120 
 76 P E 0.069274 0.286804 0.643921 -> 0.643921 
 77 F E 0.144588 0.340245 0.515168 -> 0.515168 
 78 S B 0.671750 0.232127 0.096123 -> 0.671750 
 79 G B 0.486909 0.313101 0.199989 -> 0.486909 
 80 G B 0.852791 0.116461 0.030748 -> 0.852791 
 81 S B 0.532980 0.343318 0.123703 -> 0.532980 
 82 L B 0.674319 0.259726 0.065955 -> 0.674319 
 83 H M 0.311155 0.410320 0.278525 -> 0.410320 
 84 H B 0.590460 0.353216 0.056325 -> 0.590460 
 85 A B 0.401548 0.371897 0.226555 -> 0.401548 
 86 H B 0.619645 0.315181 0.065175 -> 0.619645 
 87 M B 0.779413 0.184896 0.035690 -> 0.779413 
 88 Q B 0.836172 0.140581 0.023247 -> 0.836172 
 89 I B 0.884405 0.108258 0.007337 -> 0.884405 
 90 I B 0.860767 0.130203 0.009030 -> 0.860767 
 91 G B 0.860264 0.123221 0.016514 -> 0.860264 
 92 M B 0.795571 0.191133 0.013296 -> 0.795571 
 93 K E 0.010563 0.251649 0.737788 -> 0.737788 
 94 Y E 0.099587 0.438273 0.462140 -> 0.462140 
 95 V B 0.442792 0.436871 0.120337 -> 0.442792 
 96 N E 0.156814 0.415193 0.427993 -> 0.427993 
 97 Y M 0.176037 0.543577 0.280386 -> 0.543577 
 98 L M 0.189715 0.430419 0.379865 -> 0.430419 
 99 D E 0.075438 0.438374 0.486188 -> 0.486188 
 100 N E 0.043144 0.298895 0.657961 -> 0.657961 
 101 V M 0.338761 0.433300 0.227939 -> 0.433300 
 102 E E 0.076219 0.410430 0.513351 -> 0.513351 
 103 Q E 0.067153 0.354718 0.578129 -> 0.578129 
 104 D E 0.027313 0.166861 0.805826 -> 0.805826 
 105 N E 0.046959 0.375069 0.577972 -> 0.577972 
 106 F B 0.506716 0.398745 0.094539 -> 0.506716 
 107 Q E 0.011230 0.184903 0.803866 -> 0.803866 
 108 G E 0.038408 0.170650 0.790941 -> 0.790941 
 109 V M 0.359590 0.541833 0.098577 -> 0.541833 
 110 I M 0.196307 0.515090 0.288603 -> 0.515090 
 111 V B 0.710792 0.244528 0.044680 -> 0.710792 
 112 Q M 0.174738 0.569105 0.256157 -> 0.569105 
 113 K E 0.018129 0.219839 0.762032 -> 0.762032 
 114 N E 0.048643 0.396470 0.554887 -> 0.554887 
 115 E E 0.033471 0.285798 0.680730 -> 0.680730 
 116 H E 0.031289 0.447120 0.521591 -> 0.521591 
 117 I B 0.715839 0.259709 0.024452 -> 0.715839 
 118 E M 0.039307 0.568523 0.392170 -> 0.568523 
 119 L B 0.827658 0.164557 0.007785 -> 0.827658 
 120 N M 0.283903 0.613158 0.102940 -> 0.613158 
 121 I B 0.875881 0.113412 0.010707 -> 0.875881 
 122 S B 0.527553 0.365315 0.107132 -> 0.527553 
 123 D E 0.189244 0.360932 0.449824 -> 0.449824 
 124 R M 0.237475 0.546222 0.216303 -> 0.546222 
 125 P B 0.750363 0.174396 0.075241 -> 0.750363 
 126 I M 0.442197 0.453130 0.104673 -> 0.453130 
 127 I B 0.559555 0.297920 0.142525 -> 0.559555 
 128 G B 0.694499 0.178468 0.127034 -> 0.694499 
 129 F M 0.332285 0.469316 0.198399 -> 0.469316 
 130 T B 0.535370 0.322406 0.142224 -> 0.535370 
 131 E M 0.383919 0.473951 0.142130 -> 0.473951 
 132 F B 0.800124 0.185072 0.014803 -> 0.800124 
 133 N M 0.446385 0.465469 0.088147 -> 0.465469 
 134 I B 0.889058 0.102391 0.008551 -> 0.889058 
 135 I M 0.336814 0.598636 0.064549 -> 0.598636 
 136 I B 0.813706 0.161966 0.024328 -> 0.813706 
 137 E M 0.074957 0.592958 0.332084 -> 0.592958 
 138 D E 0.019764 0.209423 0.770813 -> 0.770813 
 139 I E 0.031662 0.340493 0.627845 -> 0.627845 
 140 G E 0.022883 0.138922 0.838195 -> 0.838195 
 141 C M 0.262711 0.541074 0.196215 -> 0.541074 
 142 I B 0.562275 0.384475 0.053250 -> 0.562275 
 143 D E 0.019869 0.297184 0.682947 -> 0.682947 
 144 E M 0.061431 0.599772 0.338797 -> 0.599772 
 145 L B 0.979423 0.014945 0.005632 -> 0.979423 
 146 A B 0.886303 0.096106 0.017591 -> 0.886303 
 147 N M 0.056634 0.540538 0.402827 -> 0.540538 
 148 Y B 0.549296 0.428780 0.021924 -> 0.549296 
 149 I B 0.986994 0.011132 0.001874 -> 0.986994 
 150 Q M 0.343348 0.571772 0.084880 -> 0.571772 
 151 Q M 0.039076 0.534346 0.426578 -> 0.534346 
 152 T B 0.964656 0.027503 0.007840 -> 0.964656 
 153 V B 0.976399 0.020557 0.003044 -> 0.976399 
 154 R M 0.035121 0.488801 0.476078 -> 0.488801 
 155 Y M 0.171686 0.727447 0.100867 -> 0.727447 
 156 I B 0.970747 0.024086 0.005167 -> 0.970747 
 157 L M 0.438957 0.522248 0.038795 -> 0.522248 
 158 T E 0.040773 0.310833 0.648394 -> 0.648394 
 159 D M 0.126722 0.599621 0.273657 -> 0.599621 
 160 F B 0.685510 0.283924 0.030566 -> 0.685510 
 161 H E 0.063053 0.354362 0.582585 -> 0.582585 
 162 K E 0.007626 0.107283 0.885091 -> 0.885091 
 163 G E 0.129102 0.404092 0.466807 -> 0.466807 
 164 C M 0.387842 0.494145 0.118013 -> 0.494145 
 165 S M 0.185351 0.445005 0.369644 -> 0.445005 
 166 S B 0.563435 0.346275 0.090290 -> 0.563435 
 167 Y B 0.642109 0.348172 0.009718 -> 0.642109 
 168 N B 0.837492 0.156073 0.006435 -> 0.837492 
 169 L B 0.969621 0.028486 0.001893 -> 0.969621 
 170 F B 0.941067 0.052214 0.006719 -> 0.941067 
 171 F B 0.954704 0.043450 0.001846 -> 0.954704 
 172 Y B 0.794751 0.193761 0.011488 -> 0.794751 
 173 Y M 0.164388 0.659733 0.175879 -> 0.659733 
 174 L B 0.677038 0.292745 0.030217 -> 0.677038 
 175 N E 0.032992 0.332650 0.634358 -> 0.634358 
 176 E E 0.049148 0.387323 0.563528 -> 0.563528 
 177 K M 0.146818 0.668031 0.185151 -> 0.668031 
 178 I B 0.926501 0.066250 0.007249 -> 0.926501 
 179 I B 0.742658 0.245795 0.011547 -> 0.742658 
 180 C B 0.955237 0.043640 0.001123 -> 0.955237 
 181 K M 0.266009 0.643609 0.090382 -> 0.643609 
 182 V B 0.841098 0.151355 0.007547 -> 0.841098 
 183 V B 0.684535 0.293419 0.022046 -> 0.684535 
 184 P B 0.849059 0.131321 0.019620 -> 0.849059 
 185 R M 0.400948 0.495641 0.103411 -> 0.495641 
 186 F B 0.576989 0.329208 0.093803 -> 0.576989 
 187 V B 0.527559 0.343957 0.128484 -> 0.527559 
 188 V M 0.401290 0.441089 0.157621 -> 0.441089 
 189 S B 0.493275 0.355446 0.151279 -> 0.493275 
 190 P B 0.379249 0.320005 0.300746 -> 0.379249 
 191 L B 0.477847 0.375367 0.146786 -> 0.477847 
 192 Y B 0.484112 0.390344 0.125545 -> 0.484112 
 193 V B 0.644952 0.262296 0.092752 -> 0.644952 
 194 G B 0.686472 0.224398 0.089130 -> 0.686472 
 195 Y B 0.513941 0.435672 0.050387 -> 0.513941 
 196 K E 0.036671 0.403719 0.559610 -> 0.559610 
 197 I B 0.664227 0.310656 0.025117 -> 0.664227 
 198 P M 0.185414 0.507376 0.307210 -> 0.507376 
 199 Q B 0.514513 0.313292 0.172195 -> 0.514513 
 200 V M 0.306937 0.433587 0.259476 -> 0.433587 
 201 S M 0.284750 0.396896 0.318354 -> 0.396896 
 202 T E 0.072856 0.373154 0.553991 -> 0.553991 
 203 K E 0.006327 0.213801 0.779872 -> 0.779872 
 204 I M 0.430487 0.484218 0.085294 -> 0.484218 
 205 E E 0.045019 0.273258 0.681724 -> 0.681724 
 206 D E 0.007316 0.218161 0.774523 -> 0.774523 
 207 V B 0.622376 0.342560 0.035064 -> 0.622376 
 208 K M 0.102679 0.618676 0.278645 -> 0.618676 
 209 I E 0.020256 0.180883 0.798860 -> 0.798860 
 210 Q E 0.036922 0.382481 0.580598 -> 0.580598 
 211 L B 0.927087 0.063479 0.009434 -> 0.927087 
 212 A M 0.179290 0.652765 0.167945 -> 0.652765 
 213 A E 0.004640 0.079253 0.916107 -> 0.916107 
 214 Y M 0.029800 0.553318 0.416881 -> 0.553318 
 215 F M 0.433464 0.492785 0.073751 -> 0.492785 
 216 T E 0.004654 0.095893 0.899453 -> 0.899453 
 217 K E 0.000573 0.017365 0.982061 -> 0.982061 
