# Supplementary material for: AcconPred: Predicting Solvent Accessibility and Contact Number Simultaneously by a Multitask Learning Framework under the Conditional Neural Fields Model
Source: Biomed Res Int. 2015 Aug 3;2015:678764. doi: 10.1155/2015/678764 (PMC4538422; doi:10.1155/2015/678764)
Supplement: Supplementary file 1 — Training/testing dataset as well as the CASP11 evaluation dataset could be found in the Supplementary Material. The CASP11 evaluation dataset contains all detailed results from SPINE-X, SANN, ACCpro5 and AcconPred. [file 678764.f1.zip › Supplmentary_Files/105_casp11_domain/casp11_domain_AcconPred/T0789-D1.reso]

# AcconPred: three-state solvent accessibility prediction results 
# probabilities are in the order of B (Bury, pACC: 0-10), M (Medium, pACC: 11-40) and E (Exposed, pACC: 41-100), 
# where pACC is the relative solvent accessibility value calculated by DSSP 
# output format: <position> <one letter amino acid> <predicted label> ... <probabilities> ... -> <maximal probability> 

 1 N E 0.004876 0.043750 0.951374 -> 0.951374 
 2 A E 0.035363 0.311132 0.653505 -> 0.653505 
 3 V M 0.325332 0.486736 0.187932 -> 0.486736 
 4 E M 0.144118 0.451856 0.404026 -> 0.451856 
 5 L B 0.881414 0.109456 0.009129 -> 0.881414 
 6 T M 0.216616 0.650746 0.132638 -> 0.650746 
 7 V B 0.652200 0.263755 0.084044 -> 0.652200 
 8 D M 0.270007 0.549627 0.180366 -> 0.549627 
 9 N B 0.682275 0.273459 0.044267 -> 0.682275 
 10 A B 0.945820 0.046990 0.007190 -> 0.945820 
 11 W B 0.600885 0.348080 0.051035 -> 0.600885 
 12 F B 0.852693 0.126380 0.020927 -> 0.852693 
 13 I B 0.976369 0.018938 0.004693 -> 0.976369 
 14 A B 0.853776 0.131837 0.014388 -> 0.853776 
 15 E M 0.206272 0.515047 0.278682 -> 0.515047 
 16 T M 0.310029 0.577510 0.112461 -> 0.577510 
 17 I B 0.510383 0.452728 0.036889 -> 0.510383 
 18 G E 0.046980 0.325483 0.627537 -> 0.627537 
 19 A B 0.500099 0.411288 0.088613 -> 0.500099 
 20 G E 0.039072 0.280125 0.680803 -> 0.680803 
 21 T E 0.014874 0.199356 0.785771 -> 0.785771 
 22 F B 0.495323 0.460074 0.044603 -> 0.495323 
 23 P B 0.478968 0.413245 0.107787 -> 0.478968 
 24 W B 0.486118 0.444999 0.068883 -> 0.486118 
 25 V B 0.606656 0.355423 0.037922 -> 0.606656 
 26 L B 0.947002 0.048044 0.004954 -> 0.947002 
 27 A B 0.666226 0.307172 0.026601 -> 0.666226 
 28 I B 0.923827 0.070539 0.005635 -> 0.923827 
 29 T M 0.329823 0.521062 0.149115 -> 0.521062 
 30 M B 0.650691 0.298753 0.050555 -> 0.650691 
 31 P E 0.122865 0.419775 0.457360 -> 0.457360 
 32 Y M 0.276978 0.540414 0.182607 -> 0.540414 
 33 S E 0.079614 0.352013 0.568373 -> 0.568373 
 34 D E 0.019487 0.287945 0.692569 -> 0.692569 
 35 A E 0.084199 0.319767 0.596034 -> 0.596034 
 36 A E 0.008716 0.051095 0.940190 -> 0.940190 
 37 Q M 0.127737 0.511090 0.361173 -> 0.511090 
 38 R M 0.278248 0.546646 0.175106 -> 0.546646 
 39 G E 0.043444 0.224636 0.731920 -> 0.731920 
 40 A E 0.037728 0.281664 0.680608 -> 0.680608 
 41 F B 0.818610 0.152038 0.029352 -> 0.818610 
 42 V M 0.474034 0.492667 0.033298 -> 0.492667 
 43 D E 0.013195 0.202986 0.783819 -> 0.783819 
 44 R E 0.012317 0.318329 0.669354 -> 0.669354 
 45 Q B 0.808572 0.172530 0.018898 -> 0.808572 
 46 R M 0.120317 0.744077 0.135606 -> 0.744077 
 47 D E 0.013058 0.142695 0.844247 -> 0.844247 
 48 E M 0.130395 0.698892 0.170713 -> 0.698892 
 49 L B 0.986001 0.007919 0.006081 -> 0.986001 
 50 T M 0.067914 0.543561 0.388525 -> 0.543561 
 51 R E 0.001386 0.080364 0.918250 -> 0.918250 
 52 M M 0.271405 0.628417 0.100178 -> 0.628417 
 53 G M 0.271240 0.365155 0.363605 -> 0.365155 
 54 L B 0.837226 0.134732 0.028042 -> 0.837226 
 55 L B 0.508518 0.391992 0.099490 -> 0.508518 
 56 S M 0.370336 0.559986 0.069678 -> 0.559986 
 57 P E 0.022018 0.278269 0.699713 -> 0.699713 
 58 Q E 0.005465 0.140715 0.853820 -> 0.853820 
 59 G E 0.168584 0.375937 0.455479 -> 0.455479 
 60 V E 0.040017 0.327975 0.632007 -> 0.632007 
 61 I B 0.512469 0.458184 0.029347 -> 0.512469 
 62 N M 0.170763 0.680898 0.148339 -> 0.680898 
 63 P E 0.049096 0.249148 0.701755 -> 0.701755 
 64 A M 0.100933 0.535766 0.363301 -> 0.535766 
 65 V B 0.981169 0.013592 0.005239 -> 0.981169 
 66 A B 0.678877 0.295972 0.025151 -> 0.678877 
 67 D M 0.153108 0.567469 0.279423 -> 0.567469 
 68 W B 0.771522 0.221080 0.007398 -> 0.771522 
 69 I B 0.985089 0.012722 0.002188 -> 0.985089 
 70 K M 0.040116 0.530886 0.428997 -> 0.530886 
 71 V B 0.510126 0.369520 0.120354 -> 0.510126 
 72 V B 0.898728 0.081757 0.019516 -> 0.898728 
 73 C B 0.715551 0.258507 0.025942 -> 0.715551 
 74 F M 0.354306 0.523677 0.122017 -> 0.523677 
 75 P M 0.315627 0.382358 0.302014 -> 0.382358 
 76 D E 0.114498 0.408046 0.477456 -> 0.477456 
 77 R B 0.528588 0.438172 0.033240 -> 0.528588 
 78 W M 0.382630 0.521491 0.095879 -> 0.521491 
 79 L B 0.970790 0.026542 0.002668 -> 0.970790 
 80 D B 0.688301 0.283361 0.028338 -> 0.688301 
 81 L B 0.967324 0.030730 0.001945 -> 0.967324 
 82 R B 0.490891 0.452907 0.056203 -> 0.490891 
 83 Y B 0.652976 0.328178 0.018846 -> 0.652976 
 84 V B 0.642057 0.315862 0.042080 -> 0.642057 
 85 G B 0.518613 0.386029 0.095359 -> 0.518613 
 86 P E 0.132644 0.425304 0.442052 -> 0.442052 
 87 A E 0.082359 0.237855 0.679785 -> 0.679785 
 88 S E 0.104070 0.316592 0.579338 -> 0.579338 
 89 A E 0.130790 0.357934 0.511277 -> 0.511277 
 90 D E 0.030352 0.163622 0.806026 -> 0.806026 
 91 G E 0.092466 0.262020 0.645513 -> 0.645513 
 92 A E 0.108825 0.232355 0.658820 -> 0.658820 
 93 C E 0.181708 0.324238 0.494054 -> 0.494054 
 94 E E 0.066710 0.358315 0.574975 -> 0.574975 
 95 L B 0.549970 0.320584 0.129446 -> 0.549970 
 96 L B 0.587236 0.339584 0.073180 -> 0.587236 
 97 R M 0.303125 0.537085 0.159790 -> 0.537085 
 98 G B 0.708737 0.209566 0.081697 -> 0.708737 
 99 I B 0.710435 0.244126 0.045439 -> 0.710435 
 100 V B 0.775558 0.205769 0.018673 -> 0.775558 
 101 A B 0.907750 0.082831 0.009418 -> 0.907750 
 102 L B 0.754590 0.222874 0.022536 -> 0.754590 
 103 R B 0.598005 0.341458 0.060537 -> 0.598005 
 104 T B 0.779276 0.186704 0.034019 -> 0.779276 
 105 G B 0.854612 0.118448 0.026940 -> 0.854612 
 106 T B 0.755427 0.182877 0.061697 -> 0.755427 
 107 G B 0.761985 0.161114 0.076900 -> 0.761985 
 108 K M 0.193056 0.499551 0.307393 -> 0.499551 
 109 K E 0.062618 0.433571 0.503810 -> 0.503810 
 110 T E 0.041065 0.309312 0.649623 -> 0.649623 
 111 G E 0.083443 0.347247 0.569310 -> 0.569310 
 112 N M 0.192237 0.658485 0.149277 -> 0.658485 
 113 G B 0.830567 0.158257 0.011176 -> 0.830567 
 114 V B 0.895070 0.102208 0.002722 -> 0.895070 
 115 V B 0.976888 0.020747 0.002365 -> 0.976888 
 116 A B 0.984233 0.014475 0.001292 -> 0.984233 
 117 L B 0.908104 0.089997 0.001899 -> 0.908104 
 118 R M 0.457358 0.487869 0.054773 -> 0.487869 
 119 N M 0.295770 0.533084 0.171146 -> 0.533084 
 120 A M 0.258788 0.373036 0.368176 -> 0.373036 
 121 Q E 0.057819 0.392389 0.549792 -> 0.549792 
 122 L M 0.270412 0.611446 0.118142 -> 0.611446 
 123 V B 0.951513 0.045655 0.002832 -> 0.951513 
 124 T B 0.616415 0.349988 0.033597 -> 0.616415 
 125 F B 0.963226 0.034712 0.002062 -> 0.963226 
 126 T M 0.183095 0.661702 0.155204 -> 0.661702 
 127 A M 0.231308 0.396298 0.372394 -> 0.396298 
 128 M B 0.726393 0.249486 0.024122 -> 0.726393 
 129 D E 0.083919 0.441728 0.474354 -> 0.474354 
 130 I M 0.240479 0.565824 0.193697 -> 0.565824 
 131 D E 0.015694 0.149028 0.835278 -> 0.835278 
 132 D M 0.232304 0.599896 0.167800 -> 0.599896 
 133 P E 0.273180 0.360172 0.366648 -> 0.366648 
 134 R E 0.081398 0.378779 0.539823 -> 0.539823 
 135 A B 0.568950 0.319531 0.111520 -> 0.568950 
 136 L B 0.758714 0.198480 0.042806 -> 0.758714 
 137 V B 0.727742 0.220798 0.051460 -> 0.727742 
 138 P B 0.520240 0.295572 0.184188 -> 0.520240 
 139 I B 0.577523 0.269924 0.152552 -> 0.577523 
 140 L B 0.680703 0.268844 0.050453 -> 0.680703 
 141 G M 0.366352 0.425532 0.208116 -> 0.425532 
 142 V E 0.190902 0.351688 0.457410 -> 0.457410 
 143 G E 0.023189 0.143234 0.833577 -> 0.833577 
