# Supplementary material for: AcconPred: Predicting Solvent Accessibility and Contact Number Simultaneously by a Multitask Learning Framework under the Conditional Neural Fields Model
Source: Biomed Res Int. 2015 Aug 3;2015:678764. doi: 10.1155/2015/678764 (PMC4538422; doi:10.1155/2015/678764)
Supplement: Supplementary file 1 — Training/testing dataset as well as the CASP11 evaluation dataset could be found in the Supplementary Material. The CASP11 evaluation dataset contains all detailed results from SPINE-X, SANN, ACCpro5 and AcconPred. [file 678764.f1.zip › Supplmentary_Files/105_casp11_domain/casp11_domain_AcconPred/T0789-D2.reso]

# AcconPred: three-state solvent accessibility prediction results 
# probabilities are in the order of B (Bury, pACC: 0-10), M (Medium, pACC: 11-40) and E (Exposed, pACC: 41-100), 
# where pACC is the relative solvent accessibility value calculated by DSSP 
# output format: <position> <one letter amino acid> <predicted label> ... <probabilities> ... -> <maximal probability> 

 1 L E 0.002694 0.036112 0.961194 -> 0.961194 
 2 A E 0.015700 0.159955 0.824345 -> 0.824345 
 3 H E 0.009949 0.093991 0.896060 -> 0.896060 
 4 R M 0.065926 0.506389 0.427684 -> 0.506389 
 5 P E 0.052864 0.228663 0.718473 -> 0.718473 
 6 P E 0.082478 0.424658 0.492864 -> 0.492864 
 7 A B 0.546628 0.364499 0.088873 -> 0.546628 
 8 R E 0.009077 0.190807 0.800116 -> 0.800116 
 9 F M 0.408304 0.538738 0.052958 -> 0.538738 
 10 D E 0.012017 0.281575 0.706408 -> 0.706408 
 11 E E 0.026152 0.290463 0.683385 -> 0.683385 
 12 F B 0.498160 0.453548 0.048292 -> 0.498160 
 13 S M 0.239722 0.477723 0.282555 -> 0.477723 
 14 L B 0.857053 0.127209 0.015739 -> 0.857053 
 15 P M 0.243247 0.510365 0.246388 -> 0.510365 
 16 T M 0.301827 0.513654 0.184518 -> 0.513654 
 17 R E 0.014272 0.170633 0.815095 -> 0.815095 
 18 V M 0.290583 0.486117 0.223299 -> 0.486117 
 19 G B 0.733578 0.212279 0.054143 -> 0.733578 
 20 A M 0.176522 0.520937 0.302541 -> 0.520937 
 21 R E 0.012117 0.212400 0.775482 -> 0.775482 
 22 A B 0.597244 0.369603 0.033153 -> 0.597244 
 23 D M 0.208865 0.649629 0.141507 -> 0.649629 
 24 E E 0.005993 0.058905 0.935102 -> 0.935102 
 25 R E 0.017181 0.234265 0.748554 -> 0.748554 
 26 L M 0.418763 0.516614 0.064623 -> 0.516614 
 27 R E 0.026431 0.280936 0.692633 -> 0.692633 
 28 S E 0.008578 0.088814 0.902607 -> 0.902607 
 29 G E 0.115139 0.324911 0.559950 -> 0.559950 
 30 V M 0.199397 0.505764 0.294838 -> 0.505764 
 31 P E 0.049661 0.331342 0.618996 -> 0.618996 
 32 L B 0.621748 0.339399 0.038854 -> 0.621748 
 33 G B 0.469387 0.421610 0.109003 -> 0.469387 
 34 E E 0.017902 0.273539 0.708560 -> 0.708560 
 35 V B 0.486039 0.457220 0.056741 -> 0.486039 
 36 V B 0.957956 0.030936 0.011108 -> 0.957956 
 37 D E 0.017531 0.337060 0.645410 -> 0.645410 
 38 Y E 0.009962 0.239495 0.750542 -> 0.750542 
 39 L M 0.191922 0.724873 0.083205 -> 0.724873 
 40 G E 0.016584 0.128829 0.854587 -> 0.854587 
 41 I B 0.582020 0.402760 0.015220 -> 0.582020 
 42 P E 0.015439 0.263874 0.720688 -> 0.720688 
 43 A E 0.039392 0.336770 0.623838 -> 0.623838 
 44 S E 0.013685 0.186041 0.800275 -> 0.800275 
 45 A M 0.271058 0.510805 0.218137 -> 0.510805 
 46 R M 0.079060 0.780551 0.140389 -> 0.780551 
 47 P E 0.045006 0.252915 0.702079 -> 0.702079 
 48 V M 0.251905 0.609874 0.138221 -> 0.609874 
 49 V B 0.874597 0.113402 0.012001 -> 0.874597 
 50 E M 0.312548 0.582677 0.104775 -> 0.582677 
 51 S E 0.068839 0.450940 0.480222 -> 0.480222 
 52 V B 0.648416 0.286789 0.064796 -> 0.648416 
 53 F B 0.513524 0.442987 0.043489 -> 0.513524 
 54 S E 0.034863 0.143170 0.821967 -> 0.821967 
 55 G M 0.150461 0.555747 0.293792 -> 0.555747 
 56 P E 0.174060 0.407118 0.418822 -> 0.418822 
 57 R M 0.205691 0.518912 0.275397 -> 0.518912 
 58 S B 0.708473 0.256698 0.034829 -> 0.708473 
 59 Y M 0.337438 0.607207 0.055355 -> 0.607207 
 60 V B 0.955532 0.042207 0.002261 -> 0.955532 
 61 E B 0.740380 0.239788 0.019832 -> 0.740380 
 62 I B 0.966485 0.031759 0.001756 -> 0.966485 
 63 V B 0.782422 0.209447 0.008130 -> 0.782422 
 64 A B 0.966717 0.031400 0.001884 -> 0.966717 
 65 G B 0.765455 0.217286 0.017259 -> 0.765455 
 66 C B 0.622335 0.355743 0.021922 -> 0.622335 
 67 N M 0.302234 0.542090 0.155676 -> 0.542090 
 68 R E 0.036659 0.334712 0.628630 -> 0.628630 
 69 D E 0.023307 0.171922 0.804770 -> 0.804770 
 70 G E 0.118287 0.314970 0.566743 -> 0.566743 
 71 R E 0.034665 0.256307 0.709029 -> 0.709029 
 72 H M 0.102029 0.450295 0.447676 -> 0.450295 
 73 T E 0.114594 0.425236 0.460169 -> 0.460169 
 74 T E 0.084991 0.417759 0.497251 -> 0.497251 
 75 T M 0.285729 0.512976 0.201295 -> 0.512976 
 76 E E 0.019952 0.198575 0.781473 -> 0.781473 
 77 V M 0.301217 0.568443 0.130340 -> 0.568443 
 78 G B 0.813667 0.162717 0.023616 -> 0.813667 
 79 L B 0.938651 0.059009 0.002340 -> 0.938651 
 80 S B 0.860882 0.127931 0.011186 -> 0.860882 
 81 I B 0.925580 0.069709 0.004711 -> 0.925580 
 82 V B 0.785694 0.200061 0.014245 -> 0.785694 
 83 D B 0.586711 0.374537 0.038751 -> 0.586711 
 84 T B 0.833349 0.156793 0.009858 -> 0.833349 
 85 S E 0.034319 0.235245 0.730436 -> 0.730436 
 86 A M 0.179968 0.553172 0.266861 -> 0.553172 
 87 G B 0.709756 0.254632 0.035612 -> 0.709756 
 88 R B 0.524737 0.440259 0.035004 -> 0.524737 
 89 V B 0.918758 0.078411 0.002832 -> 0.918758 
 90 L B 0.896214 0.090287 0.013499 -> 0.896214 
 91 V B 0.792164 0.183881 0.023955 -> 0.792164 
 92 S B 0.691504 0.273406 0.035090 -> 0.691504 
 93 P M 0.270086 0.522318 0.207597 -> 0.522318 
 94 S M 0.100724 0.490037 0.409239 -> 0.490037 
 95 R E 0.051963 0.389385 0.558652 -> 0.558652 
 96 A B 0.517024 0.355169 0.127807 -> 0.517024 
 97 F E 0.126652 0.373201 0.500147 -> 0.500147 
 98 D E 0.011170 0.085260 0.903570 -> 0.903570 
 99 G M 0.080930 0.480205 0.438865 -> 0.480205 
 100 E E 0.014723 0.242097 0.743180 -> 0.743180 
 101 W M 0.138506 0.714323 0.147171 -> 0.714323 
 102 V B 0.745235 0.239996 0.014769 -> 0.745235 
 103 S B 0.894577 0.098975 0.006449 -> 0.894577 
 104 T B 0.642288 0.331772 0.025940 -> 0.642288 
 105 F B 0.905877 0.086745 0.007378 -> 0.905877 
 106 S B 0.734246 0.229884 0.035870 -> 0.734246 
 107 P B 0.497025 0.326793 0.176182 -> 0.497025 
 108 G B 0.484452 0.323459 0.192089 -> 0.484452 
 109 T M 0.239373 0.547473 0.213154 -> 0.547473 
 110 P E 0.110371 0.392635 0.496994 -> 0.496994 
 111 F E 0.082671 0.362160 0.555168 -> 0.555168 
 112 A M 0.400800 0.501674 0.097526 -> 0.501674 
 113 I B 0.951648 0.039966 0.008387 -> 0.951648 
 114 A B 0.576597 0.376981 0.046422 -> 0.576597 
 115 V E 0.059722 0.396213 0.544065 -> 0.544065 
 116 A B 0.761402 0.228006 0.010591 -> 0.761402 
 117 I B 0.974558 0.022798 0.002644 -> 0.974558 
 118 Q E 0.017860 0.326652 0.655488 -> 0.655488 
 119 T E 0.068103 0.459199 0.472698 -> 0.472698 
 120 L B 0.888266 0.097841 0.013893 -> 0.888266 
 121 T M 0.219974 0.686564 0.093462 -> 0.686564 
 122 A E 0.002492 0.048386 0.949122 -> 0.949122 
 123 C E 0.015203 0.235119 0.749678 -> 0.749678 
 124 L M 0.298532 0.605608 0.095859 -> 0.605608 
 125 P E 0.008221 0.149913 0.841867 -> 0.841867 
 126 D E 0.003830 0.027547 0.968623 -> 0.968623 
