# Supplementary material for: AcconPred: Predicting Solvent Accessibility and Contact Number Simultaneously by a Multitask Learning Framework under the Conditional Neural Fields Model
Source: Biomed Res Int. 2015 Aug 3;2015:678764. doi: 10.1155/2015/678764 (PMC4538422; doi:10.1155/2015/678764)
Supplement: Supplementary file 1 — Training/testing dataset as well as the CASP11 evaluation dataset could be found in the Supplementary Material. The CASP11 evaluation dataset contains all detailed results from SPINE-X, SANN, ACCpro5 and AcconPred. [file 678764.f1.zip › Supplmentary_Files/105_casp11_domain/casp11_domain_AcconPred/T0790-D1.reso]

# AcconPred: three-state solvent accessibility prediction results 
# probabilities are in the order of B (Bury, pACC: 0-10), M (Medium, pACC: 11-40) and E (Exposed, pACC: 41-100), 
# where pACC is the relative solvent accessibility value calculated by DSSP 
# output format: <position> <one letter amino acid> <predicted label> ... <probabilities> ... -> <maximal probability> 

 1 M E 0.006959 0.057035 0.936005 -> 0.936005 
 2 G E 0.013941 0.220378 0.765681 -> 0.765681 
 3 P E 0.061994 0.345908 0.592098 -> 0.592098 
 4 N E 0.049177 0.322473 0.628351 -> 0.628351 
 5 A M 0.317407 0.451204 0.231389 -> 0.451204 
 6 V B 0.592301 0.349104 0.058595 -> 0.592301 
 7 E M 0.105325 0.578237 0.316438 -> 0.578237 
 8 L B 0.928110 0.068402 0.003488 -> 0.928110 
 9 T M 0.154311 0.702005 0.143685 -> 0.702005 
 10 T B 0.487395 0.410125 0.102480 -> 0.487395 
 11 D M 0.281616 0.562077 0.156307 -> 0.562077 
 12 Q B 0.811979 0.172694 0.015326 -> 0.811979 
 13 A B 0.964248 0.031185 0.004566 -> 0.964248 
 14 W M 0.451253 0.492899 0.055848 -> 0.492899 
 15 C B 0.878178 0.111992 0.009829 -> 0.878178 
 16 L B 0.975586 0.021550 0.002865 -> 0.975586 
 17 A B 0.723146 0.256436 0.020419 -> 0.723146 
 18 D M 0.147911 0.518032 0.334057 -> 0.518032 
 19 V M 0.196574 0.677442 0.125984 -> 0.677442 
 20 L M 0.454151 0.478209 0.067640 -> 0.478209 
 21 G E 0.026216 0.237290 0.736494 -> 0.736494 
 22 A B 0.526903 0.389430 0.083667 -> 0.526903 
 23 G E 0.014014 0.201365 0.784621 -> 0.784621 
 24 S E 0.019166 0.193346 0.787488 -> 0.787488 
 25 Y M 0.206129 0.685285 0.108586 -> 0.685285 
 26 P B 0.608851 0.313020 0.078129 -> 0.608851 
 27 W M 0.387558 0.503943 0.108499 -> 0.503943 
 28 V B 0.478040 0.402320 0.119640 -> 0.478040 
 29 L B 0.880847 0.105100 0.014053 -> 0.880847 
 30 A M 0.430642 0.436781 0.132577 -> 0.436781 
 31 I B 0.734577 0.232757 0.032666 -> 0.734577 
 32 T M 0.232844 0.469224 0.297932 -> 0.469224 
 33 P B 0.393702 0.389442 0.216856 -> 0.393702 
 34 P E 0.089754 0.341388 0.568859 -> 0.568859 
 35 Y M 0.248409 0.524275 0.227316 -> 0.524275 
 36 S E 0.130050 0.391797 0.478153 -> 0.478153 
 37 D E 0.018707 0.252517 0.728776 -> 0.728776 
 38 H E 0.044803 0.337876 0.617321 -> 0.617321 
 39 S E 0.007206 0.075814 0.916981 -> 0.916981 
 40 Q M 0.065028 0.482771 0.452200 -> 0.482771 
 41 R M 0.300099 0.561888 0.138014 -> 0.561888 
 42 S E 0.035485 0.193957 0.770559 -> 0.770559 
 43 A E 0.024114 0.210608 0.765278 -> 0.765278 
 44 F B 0.680537 0.297422 0.022041 -> 0.680537 
 45 L M 0.249574 0.659146 0.091280 -> 0.659146 
 46 A E 0.010173 0.125934 0.863893 -> 0.863893 
 47 A E 0.075191 0.358030 0.566780 -> 0.566780 
 48 Q B 0.792670 0.185524 0.021806 -> 0.792670 
 49 S M 0.343060 0.595548 0.061392 -> 0.595548 
 50 A E 0.021805 0.174488 0.803707 -> 0.803707 
 51 E M 0.113577 0.724990 0.161433 -> 0.724990 
 52 L B 0.987090 0.008692 0.004217 -> 0.987090 
 53 T E 0.033637 0.389138 0.577225 -> 0.577225 
 54 R E 0.000544 0.044864 0.954592 -> 0.954592 
 55 M M 0.264514 0.657540 0.077945 -> 0.657540 
 56 G E 0.221362 0.379019 0.399618 -> 0.399618 
 57 V B 0.821180 0.149370 0.029450 -> 0.821180 
 58 V B 0.520720 0.378702 0.100578 -> 0.520720 
 59 N M 0.130332 0.605544 0.264125 -> 0.605544 
 60 S E 0.034823 0.316606 0.648571 -> 0.648571 
 61 A E 0.009880 0.141409 0.848711 -> 0.848711 
 62 G E 0.050581 0.305026 0.644393 -> 0.644393 
 63 A E 0.056404 0.370005 0.573591 -> 0.573591 
 64 V B 0.558738 0.412494 0.028768 -> 0.558738 
 65 D M 0.183013 0.699079 0.117909 -> 0.699079 
 66 P E 0.033963 0.224787 0.741250 -> 0.741250 
 67 R E 0.022183 0.473777 0.504040 -> 0.504040 
 68 V B 0.986086 0.009726 0.004188 -> 0.986086 
 69 A B 0.628042 0.341232 0.030726 -> 0.628042 
 70 Q M 0.134357 0.521702 0.343941 -> 0.521702 
 71 W B 0.718073 0.270730 0.011197 -> 0.718073 
 72 I B 0.983288 0.015257 0.001455 -> 0.983288 
 73 T M 0.245428 0.615622 0.138949 -> 0.615622 
 74 T B 0.632028 0.303355 0.064617 -> 0.632028 
 75 V B 0.923482 0.061410 0.015108 -> 0.923482 
 76 C B 0.767794 0.216314 0.015892 -> 0.767794 
 77 R M 0.193179 0.610260 0.196560 -> 0.610260 
 78 A B 0.600573 0.322063 0.077363 -> 0.600573 
 79 T M 0.151692 0.463926 0.384383 -> 0.463926 
 80 Q B 0.593007 0.362778 0.044215 -> 0.593007 
 81 W B 0.560667 0.406578 0.032755 -> 0.560667 
 82 L B 0.976494 0.021902 0.001604 -> 0.976494 
 83 D B 0.691453 0.290253 0.018294 -> 0.691453 
 84 L B 0.971292 0.028020 0.000688 -> 0.971292 
 85 R M 0.371002 0.570823 0.058174 -> 0.570823 
 86 F B 0.764485 0.224456 0.011059 -> 0.764485 
 87 V M 0.352007 0.565878 0.082115 -> 0.565878 
 88 S M 0.357407 0.472290 0.170303 -> 0.472290 
 89 G E 0.092924 0.423823 0.483254 -> 0.483254 
 90 P E 0.006598 0.099205 0.894197 -> 0.894197 
 91 G E 0.009104 0.151767 0.839130 -> 0.839130 
 92 D E 0.047559 0.412981 0.539461 -> 0.539461 
 93 L M 0.157566 0.590753 0.251681 -> 0.590753 
 94 L B 0.534889 0.438815 0.026296 -> 0.534889 
 95 R M 0.394810 0.552460 0.052731 -> 0.552460 
 96 G B 0.937098 0.059708 0.003194 -> 0.937098 
 97 M B 0.933876 0.063419 0.002705 -> 0.933876 
 98 V B 0.941634 0.055330 0.003036 -> 0.941634 
 99 A B 0.933558 0.063203 0.003239 -> 0.933558 
 100 R M 0.267895 0.642944 0.089161 -> 0.642944 
 101 R M 0.152766 0.627063 0.220171 -> 0.627063 
 102 S E 0.035978 0.360583 0.603439 -> 0.603439 
 103 E E 0.011117 0.180452 0.808432 -> 0.808432 
 104 E M 0.094949 0.718906 0.186145 -> 0.718906 
 105 T B 0.889881 0.102383 0.007736 -> 0.889881 
 106 V B 0.957860 0.041189 0.000951 -> 0.957860 
 107 V B 0.950244 0.048176 0.001579 -> 0.950244 
 108 A B 0.987937 0.011226 0.000837 -> 0.987937 
 109 L B 0.688330 0.306715 0.004955 -> 0.688330 
 110 R M 0.308773 0.626056 0.065172 -> 0.626056 
 111 N M 0.150754 0.553604 0.295642 -> 0.553604 
 112 A E 0.031566 0.203784 0.764650 -> 0.764650 
 113 Q E 0.017465 0.286413 0.696123 -> 0.696123 
 114 L M 0.173482 0.694754 0.131764 -> 0.694754 
 115 V B 0.955158 0.042290 0.002552 -> 0.955158 
 116 T B 0.569095 0.402727 0.028179 -> 0.569095 
 117 F B 0.966656 0.032298 0.001045 -> 0.966656 
 118 T M 0.118170 0.703527 0.178304 -> 0.703527 
 119 A E 0.139093 0.420529 0.440377 -> 0.440377 
 120 M B 0.681021 0.287043 0.031937 -> 0.681021 
 121 D E 0.081437 0.422821 0.495742 -> 0.495742 
 122 I M 0.199960 0.484227 0.315813 -> 0.484227 
 123 G E 0.052645 0.215710 0.731645 -> 0.731645 
 124 H M 0.124677 0.582412 0.292910 -> 0.582412 
 125 Q M 0.232883 0.398724 0.368393 -> 0.398724 
 126 H E 0.123442 0.392937 0.483620 -> 0.483620 
 127 A B 0.730662 0.228901 0.040436 -> 0.730662 
 128 L B 0.820239 0.154290 0.025471 -> 0.820239 
 129 V B 0.802486 0.162114 0.035399 -> 0.802486 
 130 P B 0.558220 0.269384 0.172396 -> 0.558220 
 131 V B 0.648572 0.196267 0.155161 -> 0.648572 
 132 L B 0.726368 0.243988 0.029644 -> 0.726368 
 133 T M 0.258116 0.515394 0.226491 -> 0.515394 
 134 A E 0.174401 0.317127 0.508473 -> 0.508473 
 135 G E 0.013280 0.105845 0.880874 -> 0.880874 
