# Supplementary material for: AcconPred: Predicting Solvent Accessibility and Contact Number Simultaneously by a Multitask Learning Framework under the Conditional Neural Fields Model
Source: Biomed Res Int. 2015 Aug 3;2015:678764. doi: 10.1155/2015/678764 (PMC4538422; doi:10.1155/2015/678764)
Supplement: Supplementary file 1 — Training/testing dataset as well as the CASP11 evaluation dataset could be found in the Supplementary Material. The CASP11 evaluation dataset contains all detailed results from SPINE-X, SANN, ACCpro5 and AcconPred. [file 678764.f1.zip › Supplmentary_Files/105_casp11_domain/casp11_domain_AcconPred/T0790-D2.reso]

# AcconPred: three-state solvent accessibility prediction results 
# probabilities are in the order of B (Bury, pACC: 0-10), M (Medium, pACC: 11-40) and E (Exposed, pACC: 41-100), 
# where pACC is the relative solvent accessibility value calculated by DSSP 
# output format: <position> <one letter amino acid> <predicted label> ... <probabilities> ... -> <maximal probability> 

 1 L E 0.002705 0.035689 0.961606 -> 0.961606 
 2 S E 0.017377 0.194745 0.787878 -> 0.787878 
 3 G E 0.015001 0.109312 0.875686 -> 0.875686 
 4 R E 0.044940 0.436570 0.518491 -> 0.518491 
 5 K E 0.013380 0.156404 0.830216 -> 0.830216 
 6 P M 0.102040 0.465884 0.432076 -> 0.465884 
 7 A B 0.492196 0.374216 0.133588 -> 0.492196 
 8 R E 0.009033 0.147586 0.843381 -> 0.843381 
 9 F M 0.256474 0.607585 0.135941 -> 0.607585 
 10 D E 0.009836 0.224097 0.766067 -> 0.766067 
 11 D E 0.047003 0.345254 0.607743 -> 0.607743 
 12 F B 0.492960 0.443915 0.063125 -> 0.492960 
 13 A M 0.240408 0.427981 0.331611 -> 0.427981 
 14 L B 0.721743 0.240350 0.037908 -> 0.721743 
 15 P M 0.233584 0.519683 0.246733 -> 0.519683 
 16 A M 0.282454 0.507958 0.209589 -> 0.507958 
 17 A E 0.024680 0.129202 0.846118 -> 0.846118 
 18 A M 0.241803 0.451793 0.306404 -> 0.451793 
 19 G B 0.656798 0.266965 0.076238 -> 0.656798 
 20 A E 0.099172 0.437939 0.462890 -> 0.462890 
 21 R E 0.007890 0.105370 0.886740 -> 0.886740 
 22 A B 0.477405 0.450686 0.071908 -> 0.477405 
 23 D M 0.154174 0.619597 0.226229 -> 0.619597 
 24 E E 0.006373 0.057054 0.936573 -> 0.936573 
 25 Q E 0.021485 0.196903 0.781612 -> 0.781612 
 26 I M 0.452851 0.472019 0.075130 -> 0.472019 
 27 R E 0.027673 0.311336 0.660991 -> 0.660991 
 28 N E 0.008287 0.096244 0.895470 -> 0.895470 
 29 G E 0.067688 0.319653 0.612659 -> 0.612659 
 30 A M 0.181823 0.422692 0.395485 -> 0.422692 
 31 P E 0.075786 0.348874 0.575340 -> 0.575340 
 32 L B 0.647052 0.314079 0.038869 -> 0.647052 
 33 A B 0.506372 0.404000 0.089628 -> 0.506372 
 34 E E 0.023717 0.323949 0.652334 -> 0.652334 
 35 V B 0.515245 0.439431 0.045324 -> 0.515245 
 36 L B 0.950661 0.039552 0.009787 -> 0.950661 
 37 E E 0.007235 0.268652 0.724113 -> 0.724113 
 38 F E 0.020307 0.232390 0.747303 -> 0.747303 
 39 L M 0.147721 0.764262 0.088018 -> 0.764262 
 40 G E 0.009008 0.112554 0.878438 -> 0.878438 
 41 V M 0.431462 0.540094 0.028444 -> 0.540094 
 42 P E 0.022485 0.327458 0.650056 -> 0.650056 
 43 P E 0.012776 0.216511 0.770713 -> 0.770713 
 44 S E 0.008277 0.156120 0.835603 -> 0.835603 
 45 A M 0.241022 0.539141 0.219837 -> 0.539141 
 46 R M 0.071928 0.791299 0.136773 -> 0.791299 
 47 P E 0.026776 0.204159 0.769065 -> 0.769065 
 48 L M 0.181454 0.684688 0.133858 -> 0.684688 
 49 V B 0.878922 0.113379 0.007699 -> 0.878922 
 50 E M 0.307645 0.619592 0.072763 -> 0.619592 
 51 S M 0.060322 0.501737 0.437941 -> 0.501737 
 52 V B 0.690762 0.263615 0.045623 -> 0.690762 
 53 F B 0.593176 0.381203 0.025621 -> 0.593176 
 54 D E 0.015504 0.179481 0.805015 -> 0.805015 
 55 G E 0.046773 0.367323 0.585905 -> 0.585905 
 56 R M 0.080446 0.492477 0.427077 -> 0.492477 
 57 R M 0.216743 0.513576 0.269681 -> 0.513576 
 58 T B 0.705346 0.267371 0.027283 -> 0.705346 
 59 Y M 0.470158 0.500703 0.029138 -> 0.500703 
 60 V B 0.946319 0.051092 0.002590 -> 0.946319 
 61 E B 0.741855 0.236278 0.021867 -> 0.741855 
 62 I B 0.966477 0.032161 0.001362 -> 0.966477 
 63 V B 0.798121 0.196130 0.005749 -> 0.798121 
 64 A B 0.970278 0.027642 0.002080 -> 0.970278 
 65 G B 0.752516 0.230980 0.016504 -> 0.752516 
 66 E M 0.338884 0.567149 0.093967 -> 0.567149 
 67 H M 0.280883 0.549065 0.170053 -> 0.549065 
 68 R E 0.029873 0.295870 0.674257 -> 0.674257 
 69 D E 0.023896 0.142130 0.833973 -> 0.833973 
 70 G E 0.144781 0.388760 0.466458 -> 0.466458 
 71 H E 0.073382 0.338700 0.587918 -> 0.587918 
 72 R E 0.044505 0.351566 0.603929 -> 0.603929 
 73 V M 0.135039 0.480648 0.384313 -> 0.480648 
 74 T E 0.085972 0.420160 0.493868 -> 0.493868 
 75 T M 0.331233 0.500258 0.168509 -> 0.500258 
 76 E E 0.024765 0.236782 0.738454 -> 0.738454 
 77 V M 0.275888 0.550389 0.173723 -> 0.550389 
 78 G B 0.765014 0.191989 0.042997 -> 0.765014 
 79 V B 0.926377 0.070500 0.003123 -> 0.926377 
 80 S B 0.834470 0.149237 0.016293 -> 0.834470 
 81 I B 0.919258 0.076483 0.004259 -> 0.919258 
 82 I B 0.727879 0.255477 0.016643 -> 0.727879 
 83 D B 0.615124 0.356746 0.028130 -> 0.615124 
 84 T B 0.900883 0.093547 0.005570 -> 0.900883 
 85 P E 0.032525 0.223927 0.743548 -> 0.743548 
 86 H M 0.081777 0.582696 0.335528 -> 0.582696 
 87 G B 0.769742 0.211712 0.018546 -> 0.769742 
 88 R B 0.538787 0.426571 0.034642 -> 0.538787 
 89 I B 0.924532 0.073065 0.002403 -> 0.924532 
 90 L B 0.914119 0.073641 0.012241 -> 0.914119 
 91 V B 0.842882 0.140679 0.016439 -> 0.842882 
 92 H B 0.535054 0.415574 0.049372 -> 0.535054 
 93 P M 0.298117 0.495725 0.206158 -> 0.495725 
 94 T M 0.068852 0.486405 0.444742 -> 0.486405 
 95 K E 0.021492 0.234832 0.743676 -> 0.743676 
 96 A M 0.358085 0.440583 0.201333 -> 0.440583 
 97 F E 0.125196 0.343296 0.531508 -> 0.531508 
 98 D E 0.010158 0.082877 0.906965 -> 0.906965 
 99 G E 0.087155 0.455372 0.457473 -> 0.457473 
 100 E E 0.015217 0.251175 0.733608 -> 0.733608 
 101 W M 0.116837 0.673988 0.209175 -> 0.673988 
 102 I B 0.658362 0.317546 0.024092 -> 0.658362 
 103 S B 0.863663 0.126684 0.009653 -> 0.863663 
 104 T B 0.569765 0.386205 0.044029 -> 0.569765 
 105 F B 0.901151 0.089661 0.009188 -> 0.901151 
 106 T B 0.642493 0.297125 0.060382 -> 0.642493 
 107 P B 0.505462 0.316460 0.178079 -> 0.505462 
 108 G B 0.489567 0.320666 0.189767 -> 0.489567 
 109 S M 0.197817 0.522140 0.280043 -> 0.522140 
 110 A M 0.179366 0.487697 0.332937 -> 0.487697 
 111 D E 0.021269 0.205118 0.773613 -> 0.773613 
 112 A M 0.296814 0.576408 0.126778 -> 0.576408 
 113 I B 0.967541 0.025844 0.006616 -> 0.967541 
 114 A B 0.497656 0.439790 0.062554 -> 0.497656 
 115 M E 0.034579 0.390919 0.574502 -> 0.574502 
 116 A B 0.713452 0.274656 0.011892 -> 0.713452 
 117 V B 0.980249 0.016289 0.003462 -> 0.980249 
 118 E E 0.011848 0.344190 0.643963 -> 0.643963 
 119 R E 0.007941 0.277287 0.714772 -> 0.714772 
 120 L B 0.878068 0.112605 0.009328 -> 0.878068 
 121 T M 0.335467 0.615516 0.049017 -> 0.615516 
 122 A E 0.004918 0.039151 0.955931 -> 0.955931 
 123 S E 0.025816 0.315427 0.658757 -> 0.658757 
 124 L B 0.621134 0.360300 0.018567 -> 0.621134 
 125 P E 0.016511 0.177195 0.806294 -> 0.806294 
 126 S E 0.045526 0.222478 0.731996 -> 0.731996 
 127 G E 0.066799 0.261839 0.671362 -> 0.671362 
 128 S E 0.012332 0.171722 0.815945 -> 0.815945 
 129 W M 0.230719 0.542149 0.227132 -> 0.542149 
 130 F M 0.083377 0.563859 0.352764 -> 0.563859 
