# Supplementary material for: AcconPred: Predicting Solvent Accessibility and Contact Number Simultaneously by a Multitask Learning Framework under the Conditional Neural Fields Model
Source: Biomed Res Int. 2015 Aug 3;2015:678764. doi: 10.1155/2015/678764 (PMC4538422; doi:10.1155/2015/678764)
Supplement: Supplementary file 1 — Training/testing dataset as well as the CASP11 evaluation dataset could be found in the Supplementary Material. The CASP11 evaluation dataset contains all detailed results from SPINE-X, SANN, ACCpro5 and AcconPred. [file 678764.f1.zip › Supplmentary_Files/105_casp11_domain/casp11_domain_AcconPred/T0791-D1.reso]

# AcconPred: three-state solvent accessibility prediction results 
# probabilities are in the order of B (Bury, pACC: 0-10), M (Medium, pACC: 11-40) and E (Exposed, pACC: 41-100), 
# where pACC is the relative solvent accessibility value calculated by DSSP 
# output format: <position> <one letter amino acid> <predicted label> ... <probabilities> ... -> <maximal probability> 

 1 T E 0.001633 0.019227 0.979140 -> 0.979140 
 2 R E 0.014220 0.225238 0.760543 -> 0.760543 
 3 T E 0.055419 0.359629 0.584952 -> 0.584952 
 4 D E 0.031221 0.329189 0.639589 -> 0.639589 
 5 I B 0.707438 0.272732 0.019830 -> 0.707438 
 6 T E 0.048107 0.429566 0.522328 -> 0.522328 
 7 V B 0.757645 0.222289 0.020066 -> 0.757645 
 8 N M 0.160215 0.656617 0.183167 -> 0.656617 
 9 V B 0.701189 0.253351 0.045460 -> 0.701189 
 10 D M 0.382217 0.522666 0.095117 -> 0.522666 
 11 G B 0.910463 0.076692 0.012845 -> 0.910463 
 12 F B 0.936682 0.055278 0.008040 -> 0.936682 
 13 W B 0.789769 0.188316 0.021914 -> 0.789769 
 14 M B 0.972287 0.017978 0.009735 -> 0.972287 
 15 L B 0.977983 0.018331 0.003686 -> 0.977983 
 16 Q B 0.682395 0.288209 0.029396 -> 0.682395 
 17 A B 0.574364 0.339644 0.085992 -> 0.574364 
 18 L M 0.427894 0.518781 0.053325 -> 0.518781 
 19 L B 0.572246 0.408681 0.019073 -> 0.572246 
 20 D M 0.090640 0.484608 0.424753 -> 0.484608 
 21 I B 0.644979 0.326620 0.028401 -> 0.644979 
 22 R E 0.010218 0.218774 0.771008 -> 0.771008 
 23 H E 0.052833 0.315103 0.632064 -> 0.632064 
 24 V B 0.641267 0.316615 0.042118 -> 0.641267 
 25 A B 0.693584 0.266970 0.039446 -> 0.693584 
 26 P M 0.291548 0.409548 0.298904 -> 0.409548 
 27 E M 0.239233 0.482764 0.278003 -> 0.482764 
 28 L B 0.813074 0.156418 0.030509 -> 0.813074 
 29 R M 0.226882 0.593172 0.179947 -> 0.593172 
 30 C B 0.819976 0.139465 0.040559 -> 0.819976 
 31 R M 0.228564 0.573610 0.197826 -> 0.573610 
 32 P B 0.588985 0.301213 0.109802 -> 0.588985 
 33 Y M 0.117642 0.551987 0.330371 -> 0.551987 
 34 V M 0.268291 0.528970 0.202739 -> 0.528970 
 35 S E 0.078337 0.338902 0.582761 -> 0.582761 
 36 T E 0.069953 0.305759 0.624288 -> 0.624288 
 37 D E 0.011402 0.108068 0.880531 -> 0.880531 
 38 S E 0.110075 0.434475 0.455450 -> 0.455450 
 39 N E 0.034804 0.231323 0.733873 -> 0.733873 
 40 G B 0.396914 0.350578 0.252508 -> 0.396914 
 41 M M 0.304291 0.540111 0.155597 -> 0.540111 
 42 A E 0.178612 0.348340 0.473048 -> 0.473048 
 43 V M 0.257409 0.552968 0.189623 -> 0.552968 
 44 M B 0.882228 0.090342 0.027430 -> 0.882228 
 45 R E 0.030773 0.407344 0.561883 -> 0.561883 
 46 E E 0.012011 0.166185 0.821804 -> 0.821804 
 47 Q M 0.171341 0.569048 0.259611 -> 0.569048 
 48 G E 0.347894 0.264394 0.387712 -> 0.387712 
 49 I B 0.799871 0.181237 0.018892 -> 0.799871 
 50 V B 0.725629 0.223893 0.050478 -> 0.725629 
 51 V E 0.058928 0.398544 0.542527 -> 0.542527 
 52 N E 0.037311 0.326630 0.636060 -> 0.636060 
 53 D E 0.021572 0.268677 0.709750 -> 0.709750 
 54 A E 0.078207 0.412858 0.508935 -> 0.508935 
 55 V B 0.549035 0.397150 0.053816 -> 0.549035 
 56 N M 0.160975 0.693277 0.145748 -> 0.693277 
 57 E E 0.020134 0.218178 0.761689 -> 0.761689 
 58 Q E 0.026755 0.384725 0.588521 -> 0.588521 
 59 V B 0.964962 0.028320 0.006719 -> 0.964962 
 60 A B 0.746034 0.237565 0.016401 -> 0.746034 
 61 A M 0.184642 0.481492 0.333867 -> 0.481492 
 62 R M 0.474831 0.496458 0.028711 -> 0.496458 
 63 M B 0.959370 0.036609 0.004021 -> 0.959370 
 64 K E 0.012774 0.329997 0.657229 -> 0.657229 
 65 V M 0.317167 0.474801 0.208032 -> 0.474801 
 66 L B 0.677044 0.280499 0.042457 -> 0.677044 
 67 A M 0.347746 0.350907 0.301347 -> 0.350907 
 68 A M 0.287098 0.525341 0.187561 -> 0.525341 
 69 P E 0.097096 0.318604 0.584300 -> 0.584300 
 70 D E 0.076451 0.419572 0.503977 -> 0.503977 
 71 L B 0.589494 0.380603 0.029903 -> 0.589494 
 72 E M 0.206867 0.580518 0.212615 -> 0.580518 
 73 V B 0.930765 0.065207 0.004028 -> 0.930765 
 74 V B 0.639824 0.335307 0.024869 -> 0.639824 
 75 A B 0.961697 0.034828 0.003475 -> 0.961697 
 76 L B 0.676970 0.303259 0.019770 -> 0.676970 
 77 L B 0.896919 0.097682 0.005399 -> 0.896919 
 78 S B 0.597750 0.326112 0.076139 -> 0.597750 
 79 R M 0.257941 0.526536 0.215523 -> 0.526536 
 80 G E 0.159384 0.377803 0.462814 -> 0.462814 
 81 K E 0.011007 0.099443 0.889551 -> 0.889551 
 82 L M 0.184592 0.517877 0.297531 -> 0.517877 
 83 L E 0.114764 0.371581 0.513656 -> 0.513656 
 84 Y M 0.211177 0.483354 0.305468 -> 0.483354 
 85 G E 0.200290 0.361490 0.438220 -> 0.438220 
 86 V M 0.149345 0.447741 0.402914 -> 0.447741 
 87 I B 0.446551 0.430397 0.123051 -> 0.446551 
 88 D E 0.035570 0.278053 0.686377 -> 0.686377 
 89 D E 0.065625 0.354308 0.580067 -> 0.580067 
 90 E E 0.016897 0.151051 0.832052 -> 0.832052 
 91 N E 0.030693 0.142628 0.826678 -> 0.826678 
 92 Q M 0.145429 0.448895 0.405676 -> 0.448895 
 93 P E 0.161477 0.322827 0.515696 -> 0.515696 
 94 P E 0.144641 0.334568 0.520790 -> 0.520790 
 95 G E 0.216375 0.359947 0.423677 -> 0.423677 
 96 S M 0.147054 0.431305 0.421641 -> 0.431305 
 97 R E 0.065068 0.361839 0.573093 -> 0.573093 
 98 D E 0.040390 0.241722 0.717887 -> 0.717887 
 99 I M 0.298181 0.528537 0.173283 -> 0.528537 
 100 P E 0.075076 0.279355 0.645570 -> 0.645570 
 101 D E 0.008802 0.124598 0.866600 -> 0.866600 
 102 N E 0.079604 0.376417 0.543978 -> 0.543978 
 103 E M 0.179367 0.553189 0.267444 -> 0.553189 
 104 F B 0.648863 0.330180 0.020958 -> 0.648863 
 105 R M 0.401237 0.543458 0.055305 -> 0.543458 
 106 V B 0.934377 0.063759 0.001863 -> 0.934377 
 107 V B 0.916926 0.078876 0.004199 -> 0.916926 
 108 L B 0.937238 0.059690 0.003072 -> 0.937238 
 109 A B 0.941330 0.054670 0.004001 -> 0.941330 
 110 R B 0.583175 0.379385 0.037440 -> 0.583175 
 111 R M 0.176419 0.579074 0.244507 -> 0.579074 
 112 G E 0.160646 0.389735 0.449619 -> 0.449619 
 113 Q E 0.014755 0.222068 0.763177 -> 0.763177 
 114 H M 0.179515 0.640458 0.180027 -> 0.640458 
 115 W M 0.424778 0.524370 0.050851 -> 0.524370 
 116 V B 0.942294 0.054027 0.003678 -> 0.942294 
 117 S B 0.940970 0.054964 0.004067 -> 0.940970 
 118 A B 0.983886 0.013885 0.002229 -> 0.983886 
 119 V B 0.897876 0.097220 0.004904 -> 0.897876 
 120 R B 0.523993 0.420009 0.055998 -> 0.523993 
 121 V M 0.363540 0.530055 0.106405 -> 0.530055 
 122 G E 0.128357 0.365051 0.506592 -> 0.506592 
 123 N E 0.075640 0.385214 0.539146 -> 0.539146 
 124 D M 0.167721 0.546772 0.285507 -> 0.546772 
 125 I B 0.898414 0.095348 0.006239 -> 0.898414 
 126 T M 0.394866 0.526366 0.078768 -> 0.526366 
 127 V B 0.938379 0.058385 0.003236 -> 0.938379 
 128 D M 0.103402 0.618817 0.277781 -> 0.618817 
 129 D E 0.066639 0.344613 0.588748 -> 0.588748 
 130 V B 0.675414 0.298810 0.025776 -> 0.675414 
 131 T E 0.061123 0.366214 0.572663 -> 0.572663 
 132 V M 0.377062 0.461800 0.161138 -> 0.461800 
 133 S E 0.051515 0.296188 0.652298 -> 0.652298 
 134 D E 0.042507 0.350746 0.606747 -> 0.606747 
 135 S E 0.085517 0.451608 0.462875 -> 0.462875 
 136 A E 0.047289 0.210524 0.742187 -> 0.742187 
 137 S M 0.328278 0.440726 0.230995 -> 0.440726 
 138 I B 0.735110 0.225639 0.039251 -> 0.735110 
 139 A B 0.729422 0.215122 0.055456 -> 0.729422 
 140 A M 0.200353 0.420115 0.379533 -> 0.420115 
 141 L B 0.478553 0.467682 0.053764 -> 0.478553 
 142 V B 0.923717 0.056546 0.019737 -> 0.923717 
 143 M M 0.363485 0.511852 0.124663 -> 0.511852 
 144 D E 0.055607 0.260601 0.683792 -> 0.683792 
 145 G B 0.405659 0.371138 0.223202 -> 0.405659 
 146 L B 0.607214 0.327240 0.065546 -> 0.607214 
 147 E E 0.018571 0.206416 0.775012 -> 0.775012 
 148 S E 0.048589 0.196267 0.755144 -> 0.755144 
 149 I E 0.088211 0.395489 0.516301 -> 0.516301 
