# Supplementary material for: AcconPred: Predicting Solvent Accessibility and Contact Number Simultaneously by a Multitask Learning Framework under the Conditional Neural Fields Model
Source: Biomed Res Int. 2015 Aug 3;2015:678764. doi: 10.1155/2015/678764 (PMC4538422; doi:10.1155/2015/678764)
Supplement: Supplementary file 1 — Training/testing dataset as well as the CASP11 evaluation dataset could be found in the Supplementary Material. The CASP11 evaluation dataset contains all detailed results from SPINE-X, SANN, ACCpro5 and AcconPred. [file 678764.f1.zip › Supplmentary_Files/105_casp11_domain/casp11_domain_AcconPred/T0791-D2.reso]

# AcconPred: three-state solvent accessibility prediction results 
# probabilities are in the order of B (Bury, pACC: 0-10), M (Medium, pACC: 11-40) and E (Exposed, pACC: 41-100), 
# where pACC is the relative solvent accessibility value calculated by DSSP 
# output format: <position> <one letter amino acid> <predicted label> ... <probabilities> ... -> <maximal probability> 

 1 H E 0.004249 0.046091 0.949660 -> 0.949660 
 2 H E 0.007545 0.156846 0.835608 -> 0.835608 
 3 A M 0.255273 0.417565 0.327163 -> 0.417565 
 4 D E 0.010896 0.133631 0.855473 -> 0.855473 
 5 P E 0.109030 0.373267 0.517703 -> 0.517703 
 6 A E 0.206171 0.329103 0.464725 -> 0.464725 
 7 A E 0.011878 0.130771 0.857351 -> 0.857351 
 8 I M 0.327817 0.560561 0.111622 -> 0.560561 
 9 N E 0.005480 0.178064 0.816456 -> 0.816456 
 10 A E 0.088064 0.407508 0.504427 -> 0.504427 
 11 V B 0.538433 0.376376 0.085191 -> 0.538433 
 12 N E 0.105039 0.427778 0.467183 -> 0.467183 
 13 V B 0.828008 0.154062 0.017931 -> 0.828008 
 14 P M 0.151490 0.538890 0.309620 -> 0.538890 
 15 M M 0.189536 0.677671 0.132793 -> 0.677671 
 16 E E 0.014911 0.161094 0.823995 -> 0.823995 
 17 E M 0.165055 0.647170 0.187775 -> 0.647170 
 18 M B 0.935951 0.058597 0.005452 -> 0.935951 
 19 L M 0.143020 0.689135 0.167845 -> 0.689135 
 20 E E 0.008221 0.167820 0.823959 -> 0.823959 
 21 A B 0.786461 0.190878 0.022662 -> 0.786461 
 22 T B 0.586685 0.375335 0.037979 -> 0.586685 
 23 K E 0.002052 0.080902 0.917046 -> 0.917046 
 24 S M 0.091584 0.479062 0.429354 -> 0.479062 
 25 W M 0.277732 0.586400 0.135868 -> 0.586400 
 26 Q E 0.024887 0.141870 0.833242 -> 0.833242 
 27 E E 0.009143 0.095842 0.895015 -> 0.895015 
 28 S E 0.083559 0.296416 0.620025 -> 0.620025 
 29 G E 0.049062 0.246382 0.704556 -> 0.704556 
 30 F E 0.126551 0.395875 0.477574 -> 0.477574 
 31 N E 0.118979 0.339355 0.541666 -> 0.541666 
 32 V M 0.163832 0.428135 0.408033 -> 0.428135 
 33 F E 0.139768 0.354780 0.505452 -> 0.505452 
 34 S M 0.367747 0.416884 0.215369 -> 0.416884 
 35 G M 0.309567 0.438369 0.252064 -> 0.438369 
 36 G E 0.107259 0.299119 0.593622 -> 0.593622 
 37 D M 0.271412 0.500158 0.228430 -> 0.500158 
 38 L B 0.912469 0.072460 0.015071 -> 0.912469 
 39 R E 0.028046 0.399681 0.572273 -> 0.572273 
 40 R E 0.009100 0.149370 0.841530 -> 0.841530 
 41 M M 0.215015 0.718625 0.066360 -> 0.718625 
 42 G E 0.019077 0.111723 0.869200 -> 0.869200 
 43 I B 0.614848 0.369619 0.015534 -> 0.614848 
 44 S E 0.013013 0.193024 0.793962 -> 0.793962 
 45 A E 0.047905 0.400631 0.551464 -> 0.551464 
 46 A E 0.022382 0.169454 0.808164 -> 0.808164 
 47 T M 0.310297 0.562467 0.127236 -> 0.562467 
 48 V B 0.591015 0.394813 0.014172 -> 0.591015 
 49 A E 0.032574 0.336492 0.630934 -> 0.630934 
 50 A B 0.443339 0.423233 0.133429 -> 0.443339 
 51 L B 0.945727 0.046169 0.008104 -> 0.945727 
 52 G B 0.625777 0.315578 0.058645 -> 0.625777 
 53 Q E 0.017214 0.293578 0.689208 -> 0.689208 
 54 A B 0.627471 0.280599 0.091930 -> 0.627471 
 55 L M 0.478013 0.479821 0.042166 -> 0.479821 
 56 S E 0.046776 0.244638 0.708587 -> 0.708587 
 57 D M 0.057745 0.485127 0.457128 -> 0.485127 
 58 P E 0.137211 0.421316 0.441472 -> 0.441472 
 59 A M 0.312773 0.426777 0.260450 -> 0.426777 
 60 A B 0.674024 0.280617 0.045360 -> 0.674024 
 61 E M 0.247373 0.656630 0.095997 -> 0.656630 
 62 V B 0.941761 0.056377 0.001862 -> 0.941761 
 63 A B 0.899148 0.095872 0.004980 -> 0.899148 
 64 V B 0.971937 0.026567 0.001496 -> 0.971937 
 65 Y B 0.682472 0.308506 0.009022 -> 0.682472 
 66 A B 0.976228 0.022319 0.001453 -> 0.976228 
 67 R B 0.565350 0.395457 0.039194 -> 0.565350 
 68 Q B 0.563665 0.390341 0.045995 -> 0.563665 
 69 Y M 0.293237 0.552235 0.154528 -> 0.552235 
 70 R E 0.044081 0.435098 0.520821 -> 0.520821 
 71 D E 0.026585 0.174403 0.799012 -> 0.799012 
 72 D E 0.050597 0.250301 0.699102 -> 0.699102 
 73 A E 0.104728 0.336675 0.558597 -> 0.558597 
 74 K E 0.012818 0.162036 0.825146 -> 0.825146 
 75 G M 0.180592 0.452123 0.367285 -> 0.452123 
 76 P E 0.105078 0.402833 0.492089 -> 0.492089 
 77 S M 0.272913 0.476841 0.250246 -> 0.476841 
 78 A E 0.073435 0.267786 0.658779 -> 0.658779 
 79 S M 0.273673 0.534996 0.191331 -> 0.534996 
 80 V B 0.660069 0.291910 0.048021 -> 0.660069 
 81 L B 0.890017 0.104963 0.005020 -> 0.890017 
 82 S B 0.709443 0.265392 0.025165 -> 0.709443 
 83 L B 0.824050 0.166695 0.009255 -> 0.824050 
 84 K M 0.337843 0.508269 0.153888 -> 0.508269 
 85 D M 0.445070 0.448322 0.106607 -> 0.448322 
 86 G B 0.709663 0.256427 0.033911 -> 0.709663 
 87 S E 0.035526 0.192651 0.771823 -> 0.771823 
 88 G M 0.205810 0.500985 0.293205 -> 0.500985 
 89 G B 0.672756 0.302213 0.025031 -> 0.672756 
 90 R M 0.452077 0.494922 0.053001 -> 0.494922 
 91 I B 0.975773 0.023715 0.000512 -> 0.975773 
 92 A B 0.959116 0.036758 0.004125 -> 0.959116 
 93 L B 0.940870 0.054201 0.004930 -> 0.940870 
 94 Y B 0.600215 0.372128 0.027657 -> 0.600215 
 95 Q M 0.309625 0.561943 0.128433 -> 0.561943 
 96 Q M 0.092253 0.516340 0.391407 -> 0.516340 
 97 A M 0.253850 0.524358 0.221792 -> 0.524358 
 98 R E 0.020066 0.295333 0.684601 -> 0.684601 
 99 T M 0.133718 0.490862 0.375420 -> 0.490862 
 100 A E 0.029866 0.098993 0.871141 -> 0.871141 
 101 G E 0.022622 0.114897 0.862481 -> 0.862481 
 102 G E 0.092684 0.416379 0.490938 -> 0.490938 
 103 E E 0.012414 0.278266 0.709320 -> 0.709320 
 104 A M 0.239240 0.534629 0.226131 -> 0.534629 
 105 W B 0.594847 0.383510 0.021643 -> 0.594847 
 106 L B 0.865824 0.128553 0.005623 -> 0.865824 
 107 A B 0.850264 0.142324 0.007412 -> 0.850264 
 108 I B 0.940692 0.053441 0.005868 -> 0.940692 
 109 C B 0.779581 0.195468 0.024951 -> 0.779581 
 110 P B 0.577211 0.290093 0.132695 -> 0.577211 
 111 A B 0.518955 0.290594 0.190451 -> 0.518955 
 112 T M 0.200902 0.580438 0.218660 -> 0.580438 
 113 P E 0.051440 0.353157 0.595403 -> 0.595403 
 114 Q E 0.016252 0.180539 0.803208 -> 0.803208 
 115 L M 0.244065 0.632387 0.123547 -> 0.632387 
 116 V B 0.940895 0.046770 0.012335 -> 0.940895 
 117 Q M 0.166717 0.605851 0.227432 -> 0.605851 
 118 V E 0.057670 0.339619 0.602711 -> 0.602711 
 119 G B 0.744339 0.240784 0.014878 -> 0.744339 
 120 V B 0.971698 0.020726 0.007577 -> 0.971698 
 121 K E 0.015257 0.376128 0.608614 -> 0.608614 
 122 T M 0.070998 0.573041 0.355961 -> 0.573041 
 123 V B 0.978020 0.018071 0.003909 -> 0.978020 
 124 L B 0.576852 0.398921 0.024227 -> 0.576852 
 125 D E 0.007565 0.125199 0.867235 -> 0.867235 
 126 T E 0.030917 0.409432 0.559651 -> 0.559651 
 127 L B 0.759161 0.225982 0.014857 -> 0.759161 
 128 P E 0.084530 0.394029 0.521441 -> 0.521441 
 129 Y E 0.062610 0.340291 0.597099 -> 0.597099 
 130 G E 0.081246 0.430204 0.488550 -> 0.488550 
 131 E E 0.005551 0.173576 0.820873 -> 0.820873 
 132 W B 0.602487 0.356998 0.040515 -> 0.602487 
 133 K E 0.018837 0.365312 0.615851 -> 0.615851 
 134 T E 0.013182 0.140256 0.846562 -> 0.846562 
 135 H M 0.135675 0.504020 0.360305 -> 0.504020 
 136 S E 0.067526 0.334121 0.598353 -> 0.598353 
 137 R E 0.052031 0.339715 0.608253 -> 0.608253 
 138 V E 0.015435 0.198576 0.785989 -> 0.785989 
