# Supplementary material for: AcconPred: Predicting Solvent Accessibility and Contact Number Simultaneously by a Multitask Learning Framework under the Conditional Neural Fields Model
Source: Biomed Res Int. 2015 Aug 3;2015:678764. doi: 10.1155/2015/678764 (PMC4538422; doi:10.1155/2015/678764)
Supplement: Supplementary file 1 — Training/testing dataset as well as the CASP11 evaluation dataset could be found in the Supplementary Material. The CASP11 evaluation dataset contains all detailed results from SPINE-X, SANN, ACCpro5 and AcconPred. [file 678764.f1.zip › Supplmentary_Files/105_casp11_domain/casp11_domain_AcconPred/T0792-D1.reso]

# AcconPred: three-state solvent accessibility prediction results 
# probabilities are in the order of B (Bury, pACC: 0-10), M (Medium, pACC: 11-40) and E (Exposed, pACC: 41-100), 
# where pACC is the relative solvent accessibility value calculated by DSSP 
# output format: <position> <one letter amino acid> <predicted label> ... <probabilities> ... -> <maximal probability> 

 1 E E 0.000554 0.009869 0.989577 -> 0.989577 
 2 S E 0.005581 0.135042 0.859377 -> 0.859377 
 3 N E 0.018061 0.209270 0.772668 -> 0.772668 
 4 Y E 0.069289 0.413041 0.517670 -> 0.517670 
 5 I B 0.504493 0.407225 0.088281 -> 0.504493 
 6 S M 0.183271 0.461416 0.355313 -> 0.461416 
 7 V M 0.427026 0.449270 0.123704 -> 0.449270 
 8 R M 0.052394 0.559367 0.388238 -> 0.559367 
 9 E E 0.017327 0.236119 0.746553 -> 0.746553 
 10 E E 0.005117 0.101912 0.892971 -> 0.892971 
 11 Y M 0.152500 0.658343 0.189157 -> 0.658343 
 12 P E 0.040421 0.296005 0.663574 -> 0.663574 
 13 D E 0.008519 0.124154 0.867327 -> 0.867327 
 14 I M 0.387843 0.506207 0.105950 -> 0.506207 
 15 D M 0.046739 0.506754 0.446507 -> 0.506754 
 16 S E 0.058731 0.232602 0.708666 -> 0.708666 
 17 E M 0.092585 0.547499 0.359916 -> 0.547499 
 18 V B 0.837754 0.111429 0.050818 -> 0.837754 
 19 R M 0.129374 0.675032 0.195594 -> 0.675032 
 20 A E 0.299361 0.279288 0.421351 -> 0.421351 
 21 I B 0.489818 0.438970 0.071212 -> 0.489818 
 22 L B 0.734834 0.205882 0.059285 -> 0.734834 
 23 L B 0.416429 0.402154 0.181418 -> 0.416429 
 24 S M 0.288515 0.410279 0.301206 -> 0.410279 
 25 H M 0.136247 0.489178 0.374575 -> 0.489178 
 26 A B 0.491496 0.312260 0.196244 -> 0.491496 
 27 Q E 0.042386 0.294202 0.663413 -> 0.663413 
 28 N E 0.051717 0.227276 0.721008 -> 0.721008 
 29 G B 0.391387 0.332812 0.275800 -> 0.391387 
 30 I B 0.788255 0.191829 0.019915 -> 0.788255 
 31 T M 0.150294 0.552871 0.296834 -> 0.552871 
 32 I B 0.644552 0.313684 0.041764 -> 0.644552 
 33 S M 0.190111 0.477462 0.332428 -> 0.477462 
 34 S E 0.155229 0.414651 0.430121 -> 0.430121 
 35 I B 0.681790 0.269568 0.048642 -> 0.681790 
 36 K M 0.074089 0.503953 0.421958 -> 0.503953 
 37 S E 0.018913 0.191429 0.789658 -> 0.789658 
 38 E E 0.056383 0.438752 0.504865 -> 0.504865 
 39 Y B 0.537197 0.408770 0.054033 -> 0.537197 
 40 R E 0.034707 0.451057 0.514236 -> 0.514236 
 41 K E 0.005112 0.080509 0.914379 -> 0.914379 
 42 L M 0.341283 0.476309 0.182408 -> 0.476309 
 43 T E 0.064176 0.307272 0.628552 -> 0.628552 
 44 G E 0.021431 0.140310 0.838259 -> 0.838259 
 45 N E 0.047478 0.421640 0.530881 -> 0.530881 
 46 P E 0.053228 0.286792 0.659980 -> 0.659980 
 47 F B 0.649071 0.321109 0.029820 -> 0.649071 
 48 P E 0.081892 0.414507 0.503601 -> 0.503601 
 49 L B 0.573121 0.355457 0.071422 -> 0.573121 
 50 H M 0.095680 0.536696 0.367624 -> 0.536696 
 51 D E 0.032677 0.221519 0.745804 -> 0.745804 
 52 N M 0.088567 0.497729 0.413704 -> 0.497729 
 53 V B 0.770647 0.195656 0.033697 -> 0.770647 
 54 T M 0.313941 0.446261 0.239798 -> 0.446261 
 55 D M 0.152725 0.505625 0.341650 -> 0.505625 
 56 F B 0.774154 0.200436 0.025410 -> 0.774154 
 57 L B 0.734972 0.218372 0.046656 -> 0.734972 
 58 L B 0.765110 0.175229 0.059660 -> 0.765110 
 59 T M 0.352072 0.435154 0.212774 -> 0.435154 
 60 I B 0.820336 0.164347 0.015317 -> 0.820336 
 61 P E 0.106862 0.384206 0.508932 -> 0.508932 
 62 N E 0.054749 0.317261 0.627991 -> 0.627991 
 63 V B 0.605356 0.370877 0.023767 -> 0.605356 
 64 T E 0.098019 0.441258 0.460722 -> 0.460722 
 65 A E 0.164253 0.334710 0.501037 -> 0.501037 
 66 E E 0.016841 0.234104 0.749055 -> 0.749055 
 67 C B 0.557292 0.394339 0.048370 -> 0.557292 
 68 S M 0.174819 0.524392 0.300789 -> 0.524392 
 69 E E 0.007354 0.106228 0.886419 -> 0.886419 
 70 S E 0.047636 0.226184 0.726180 -> 0.726180 
 71 G E 0.297779 0.285974 0.416248 -> 0.416248 
 72 K E 0.012803 0.195495 0.791701 -> 0.791701 
 73 R E 0.028108 0.361267 0.610624 -> 0.610624 
 74 I M 0.342359 0.439068 0.218574 -> 0.439068 
 75 F M 0.438836 0.452236 0.108928 -> 0.452236 
 76 N E 0.019134 0.244457 0.736409 -> 0.736409 
 77 L M 0.262673 0.583134 0.154193 -> 0.583134 
 78 K E 0.015478 0.126586 0.857935 -> 0.857935 
