# Supplementary material for: AcconPred: Predicting Solvent Accessibility and Contact Number Simultaneously by a Multitask Learning Framework under the Conditional Neural Fields Model
Source: Biomed Res Int. 2015 Aug 3;2015:678764. doi: 10.1155/2015/678764 (PMC4538422; doi:10.1155/2015/678764)
Supplement: Supplementary file 1 — Training/testing dataset as well as the CASP11 evaluation dataset could be found in the Supplementary Material. The CASP11 evaluation dataset contains all detailed results from SPINE-X, SANN, ACCpro5 and AcconPred. [file 678764.f1.zip › Supplmentary_Files/105_casp11_domain/casp11_domain_AcconPred/T0794-D1.reso]

# AcconPred: three-state solvent accessibility prediction results 
# probabilities are in the order of B (Bury, pACC: 0-10), M (Medium, pACC: 11-40) and E (Exposed, pACC: 41-100), 
# where pACC is the relative solvent accessibility value calculated by DSSP 
# output format: <position> <one letter amino acid> <predicted label> ... <probabilities> ... -> <maximal probability> 

 1 Q E 0.004682 0.035469 0.959849 -> 0.959849 
 2 D E 0.011932 0.173001 0.815067 -> 0.815067 
 3 T E 0.051430 0.435347 0.513223 -> 0.513223 
 4 F B 0.604253 0.364336 0.031411 -> 0.604253 
 5 I M 0.244066 0.650827 0.105107 -> 0.650827 
 6 A B 0.889908 0.106009 0.004083 -> 0.889908 
 7 A B 0.874711 0.114802 0.010487 -> 0.874711 
 8 V B 0.948226 0.048877 0.002897 -> 0.948226 
 9 Y B 0.679119 0.287144 0.033736 -> 0.679119 
 10 E B 0.464967 0.420819 0.114214 -> 0.464967 
 11 H M 0.429624 0.457671 0.112705 -> 0.457671 
 12 A M 0.367006 0.465144 0.167851 -> 0.465144 
 13 A B 0.431038 0.367690 0.201272 -> 0.431038 
 14 I M 0.285114 0.484424 0.230462 -> 0.484424 
 15 L B 0.539047 0.342048 0.118905 -> 0.539047 
 16 P E 0.268683 0.351212 0.380105 -> 0.380105 
 17 N E 0.026982 0.167083 0.805935 -> 0.805935 
 18 A M 0.201565 0.495547 0.302888 -> 0.495547 
 19 T E 0.035957 0.283999 0.680043 -> 0.680043 
 20 L M 0.224538 0.480619 0.294843 -> 0.480619 
 21 T E 0.058211 0.361805 0.579984 -> 0.579984 
 22 P E 0.052515 0.297635 0.649850 -> 0.649850 
 23 V M 0.093172 0.567287 0.339541 -> 0.567287 
 24 S E 0.042620 0.282708 0.674673 -> 0.674673 
 25 R E 0.020043 0.315158 0.664799 -> 0.664799 
 26 E E 0.013034 0.140033 0.846932 -> 0.846932 
 27 E E 0.017879 0.228742 0.753378 -> 0.753378 
 28 A B 0.825406 0.145578 0.029016 -> 0.825406 
 29 L M 0.238141 0.595152 0.166707 -> 0.595152 
 30 A E 0.016660 0.112277 0.871063 -> 0.871063 
 31 L M 0.247366 0.672914 0.079720 -> 0.672914 
 32 M B 0.870286 0.112516 0.017198 -> 0.870286 
 33 N M 0.033065 0.536566 0.430370 -> 0.536566 
 34 R E 0.005688 0.251012 0.743300 -> 0.743300 
 35 N B 0.901777 0.092393 0.005830 -> 0.901777 
 36 L B 0.850095 0.145628 0.004277 -> 0.850095 
 37 D E 0.002741 0.090536 0.906723 -> 0.906723 
 38 I M 0.094850 0.699883 0.205266 -> 0.699883 
 39 L B 0.982225 0.016099 0.001676 -> 0.982225 
 40 E M 0.063330 0.773051 0.163620 -> 0.773051 
 41 G E 0.003245 0.086311 0.910443 -> 0.910443 
 42 A B 0.677096 0.317213 0.005691 -> 0.677096 
 43 I B 0.939065 0.055152 0.005784 -> 0.939065 
 44 T E 0.015283 0.344810 0.639907 -> 0.639907 
 45 S M 0.024226 0.536748 0.439026 -> 0.536748 
 46 A B 0.987722 0.008956 0.003322 -> 0.987722 
 47 A M 0.273941 0.626607 0.099451 -> 0.626607 
 48 D E 0.004447 0.029584 0.965969 -> 0.965969 
 49 Q E 0.009609 0.273990 0.716401 -> 0.716401 
 50 G E 0.039807 0.291252 0.668941 -> 0.668941 
 51 A B 0.976700 0.022614 0.000685 -> 0.976700 
 52 H M 0.224497 0.678600 0.096903 -> 0.678600 
 53 I B 0.944756 0.053957 0.001288 -> 0.944756 
 54 I B 0.981251 0.017526 0.001223 -> 0.981251 
 55 V B 0.993344 0.006069 0.000587 -> 0.993344 
 56 T B 0.984099 0.013146 0.002756 -> 0.984099 
 57 P B 0.848278 0.141379 0.010343 -> 0.848278 
 58 E B 0.748939 0.230411 0.020650 -> 0.748939 
 59 D B 0.811014 0.165013 0.023973 -> 0.811014 
 60 A B 0.879570 0.105470 0.014961 -> 0.879570 
 61 I B 0.756191 0.207913 0.035897 -> 0.756191 
 62 Y B 0.473436 0.418739 0.107825 -> 0.473436 
 63 G B 0.640443 0.254881 0.104677 -> 0.640443 
 64 W B 0.684621 0.275896 0.039483 -> 0.684621 
 65 N B 0.425159 0.401493 0.173347 -> 0.425159 
 66 F B 0.565313 0.359373 0.075314 -> 0.565313 
 67 N M 0.344741 0.430664 0.224595 -> 0.430664 
 68 R M 0.124454 0.531445 0.344101 -> 0.531445 
 69 D E 0.102811 0.312857 0.584332 -> 0.584332 
 70 S M 0.177734 0.505653 0.316613 -> 0.505653 
 71 L B 0.735249 0.233551 0.031200 -> 0.735249 
 72 Y M 0.187818 0.651640 0.160543 -> 0.651640 
 73 P E 0.042263 0.251452 0.706285 -> 0.706285 
 74 Y M 0.387309 0.536231 0.076460 -> 0.536231 
 75 L B 0.807657 0.176580 0.015763 -> 0.807657 
 76 E E 0.048148 0.425644 0.526208 -> 0.526208 
 77 D E 0.010465 0.164526 0.825009 -> 0.825009 
 78 I M 0.359547 0.578234 0.062219 -> 0.578234 
 79 P E 0.089661 0.373013 0.537327 -> 0.537327 
 80 D E 0.044475 0.313120 0.642405 -> 0.642405 
 81 P E 0.088389 0.340267 0.571344 -> 0.571344 
 82 E E 0.011054 0.147139 0.841807 -> 0.841807 
 83 V E 0.071089 0.306261 0.622650 -> 0.622650 
 84 N E 0.072497 0.298771 0.628732 -> 0.628732 
 85 W M 0.248392 0.551185 0.200423 -> 0.551185 
 86 I M 0.364238 0.490398 0.145364 -> 0.490398 
 87 P E 0.064266 0.355929 0.579806 -> 0.579806 
 88 C B 0.534122 0.391941 0.073937 -> 0.534122 
 89 N M 0.228969 0.476536 0.294495 -> 0.476536 
 90 N E 0.152930 0.394347 0.452722 -> 0.452722 
 91 R E 0.038631 0.264489 0.696880 -> 0.696880 
 92 N E 0.150993 0.320716 0.528291 -> 0.528291 
 93 R E 0.072169 0.379825 0.548006 -> 0.548006 
 94 F E 0.185935 0.368903 0.445162 -> 0.445162 
 95 G E 0.065201 0.324768 0.610030 -> 0.610030 
 96 Q E 0.030133 0.224671 0.745195 -> 0.745195 
 97 T M 0.101462 0.575389 0.323149 -> 0.575389 
 98 P E 0.031998 0.263387 0.704616 -> 0.704616 
 99 V B 0.664720 0.303556 0.031724 -> 0.664720 
 100 Q M 0.271336 0.637480 0.091184 -> 0.637480 
 101 E E 0.009019 0.198732 0.792249 -> 0.792249 
 102 R M 0.130117 0.731235 0.138648 -> 0.731235 
 103 L B 0.980137 0.016818 0.003045 -> 0.980137 
 104 S M 0.361707 0.593657 0.044636 -> 0.593657 
 105 C E 0.045792 0.345655 0.608552 -> 0.608552 
 106 L M 0.387912 0.584618 0.027470 -> 0.584618 
 107 A B 0.962176 0.026360 0.011464 -> 0.962176 
 108 K E 0.005231 0.132995 0.861774 -> 0.861774 
 109 N E 0.001462 0.082922 0.915616 -> 0.915616 
 110 N M 0.312807 0.624743 0.062451 -> 0.624743 
 111 S M 0.091488 0.561217 0.347294 -> 0.561217 
 112 I B 0.983485 0.015442 0.001074 -> 0.983485 
 113 Y B 0.682922 0.310993 0.006085 -> 0.682922 
 114 V B 0.978722 0.020386 0.000892 -> 0.978722 
 115 V B 0.959467 0.038197 0.002335 -> 0.959467 
 116 A B 0.970870 0.026151 0.002978 -> 0.970870 
 117 N B 0.539579 0.394666 0.065755 -> 0.539579 
 118 I B 0.789812 0.181839 0.028349 -> 0.789812 
 119 G B 0.497199 0.312098 0.190704 -> 0.497199 
 120 D B 0.506086 0.368182 0.125732 -> 0.506086 
 121 K M 0.087390 0.456660 0.455950 -> 0.456660 
 122 K E 0.032670 0.299842 0.667489 -> 0.667489 
 123 P E 0.118502 0.333876 0.547622 -> 0.547622 
 124 C M 0.280239 0.455880 0.263881 -> 0.455880 
 125 D E 0.020547 0.151141 0.828312 -> 0.828312 
 126 T E 0.054453 0.279361 0.666186 -> 0.666186 
 127 S E 0.032646 0.205872 0.761482 -> 0.761482 
 128 D E 0.075143 0.407372 0.517485 -> 0.517485 
 129 P E 0.139292 0.293289 0.567419 -> 0.567419 
 130 Q E 0.030559 0.208133 0.761308 -> 0.761308 
 131 C M 0.406632 0.483689 0.109679 -> 0.483689 
 132 P M 0.224595 0.496627 0.278778 -> 0.496627 
 133 P E 0.005279 0.079954 0.914767 -> 0.914767 
 134 D E 0.010769 0.127151 0.862079 -> 0.862079 
 135 G E 0.033070 0.244093 0.722837 -> 0.722837 
 136 R E 0.010519 0.228098 0.761382 -> 0.761382 
 137 Y M 0.150680 0.677948 0.171372 -> 0.677948 
 138 Q B 0.609078 0.358010 0.032911 -> 0.609078 
 139 Y B 0.630499 0.358627 0.010875 -> 0.630499 
 140 N B 0.961679 0.034272 0.004049 -> 0.961679 
 141 T B 0.955620 0.043369 0.001012 -> 0.955620 
 142 D B 0.948089 0.050910 0.001001 -> 0.948089 
 143 V B 0.967637 0.031488 0.000875 -> 0.967637 
 144 V B 0.985636 0.013199 0.001164 -> 0.985636 
 145 F B 0.942175 0.055284 0.002541 -> 0.942175 
 146 D B 0.676127 0.308014 0.015860 -> 0.676127 
 147 S E 0.059461 0.331142 0.609397 -> 0.609397 
 148 Q E 0.004276 0.082111 0.913613 -> 0.913613 
 149 G M 0.446531 0.484264 0.069205 -> 0.484264 
 150 K E 0.009624 0.170842 0.819534 -> 0.819534 
 151 L M 0.233898 0.552074 0.214029 -> 0.552074 
 152 V M 0.125481 0.562315 0.312204 -> 0.562315 
 153 A B 0.567155 0.346439 0.086406 -> 0.567155 
 154 R M 0.056078 0.525137 0.418785 -> 0.525137 
 155 Y M 0.352859 0.554732 0.092409 -> 0.554732 
 156 H M 0.206650 0.570321 0.223029 -> 0.570321 
 157 K B 0.401783 0.377484 0.220734 -> 0.401783 
 158 Q B 0.418607 0.374442 0.206951 -> 0.418607 
 159 N B 0.602950 0.333176 0.063875 -> 0.602950 
 160 L B 0.671780 0.239718 0.088503 -> 0.671780 
 161 F M 0.349306 0.458867 0.191828 -> 0.458867 
 162 M M 0.239147 0.461766 0.299087 -> 0.461766 
 163 G M 0.347876 0.398248 0.253876 -> 0.398248 
 164 E B 0.610065 0.272974 0.116961 -> 0.610065 
 165 N E 0.083410 0.376348 0.540242 -> 0.540242 
 166 Q M 0.165856 0.497130 0.337014 -> 0.497130 
 167 F B 0.613168 0.316736 0.070096 -> 0.613168 
 168 N E 0.207825 0.387447 0.404728 -> 0.404728 
 169 V M 0.247772 0.503631 0.248597 -> 0.503631 
 170 P E 0.109695 0.379205 0.511100 -> 0.511100 
 171 K E 0.005654 0.094224 0.900122 -> 0.900122 
 172 E E 0.025429 0.279763 0.694808 -> 0.694808 
 173 P E 0.043916 0.340050 0.616034 -> 0.616034 
 174 E E 0.006567 0.141957 0.851476 -> 0.851476 
 175 I M 0.396076 0.538009 0.065916 -> 0.538009 
 176 V M 0.266985 0.615472 0.117543 -> 0.615472 
 177 T B 0.485544 0.478383 0.036073 -> 0.485544 
 178 F B 0.884080 0.112256 0.003664 -> 0.884080 
 179 N M 0.068915 0.555182 0.375903 -> 0.555182 
 180 T B 0.734589 0.258187 0.007224 -> 0.734589 
 181 T E 0.006243 0.167598 0.826160 -> 0.826160 
 182 F M 0.110836 0.467997 0.421167 -> 0.467997 
 183 G B 0.695528 0.284625 0.019848 -> 0.695528 
 184 S M 0.364603 0.538536 0.096861 -> 0.538536 
 185 F B 0.991260 0.008019 0.000720 -> 0.991260 
 186 G B 0.979582 0.017700 0.002718 -> 0.979582 
 187 I B 0.988106 0.011165 0.000729 -> 0.988106 
 188 F B 0.954608 0.040690 0.004702 -> 0.954608 
 189 T B 0.979387 0.019169 0.001444 -> 0.979387 
 190 C B 0.968093 0.028641 0.003265 -> 0.968093 
 191 F B 0.737562 0.239212 0.023226 -> 0.737562 
 192 D B 0.740473 0.227239 0.032288 -> 0.740473 
 193 I B 0.862330 0.113772 0.023898 -> 0.862330 
 194 L B 0.530189 0.425837 0.043975 -> 0.530189 
 195 F B 0.858999 0.127560 0.013441 -> 0.858999 
 196 H M 0.431197 0.496950 0.071853 -> 0.496950 
 197 D B 0.483322 0.344863 0.171816 -> 0.483322 
 198 P B 0.845164 0.132547 0.022290 -> 0.845164 
 199 A B 0.966680 0.029324 0.003996 -> 0.966680 
 200 V B 0.600001 0.368056 0.031942 -> 0.600001 
 201 T M 0.136774 0.627717 0.235509 -> 0.627717 
 202 L B 0.900033 0.091189 0.008778 -> 0.900033 
 203 V B 0.885431 0.104696 0.009874 -> 0.885431 
 204 K E 0.006067 0.213343 0.780590 -> 0.780590 
 205 D E 0.004435 0.174212 0.821353 -> 0.821353 
 206 F M 0.186805 0.688117 0.125078 -> 0.688117 
 207 H E 0.004245 0.142617 0.853137 -> 0.853137 
 208 V B 0.942880 0.055451 0.001669 -> 0.942880 
 209 D M 0.057233 0.558675 0.384092 -> 0.558675 
 210 T B 0.853566 0.141182 0.005252 -> 0.853566 
 211 I B 0.983025 0.016091 0.000884 -> 0.983025 
 212 V B 0.984983 0.014162 0.000855 -> 0.984983 
 213 F B 0.977280 0.020389 0.002331 -> 0.977280 
 214 P B 0.898731 0.093689 0.007581 -> 0.898731 
 215 T B 0.822663 0.167766 0.009570 -> 0.822663 
 216 A B 0.806572 0.167289 0.026139 -> 0.806572 
 217 W B 0.584905 0.355831 0.059264 -> 0.584905 
 218 M M 0.424806 0.429859 0.145334 -> 0.429859 
 219 N E 0.108394 0.350604 0.541002 -> 0.541002 
 220 V E 0.139674 0.310215 0.550111 -> 0.550111 
 221 L M 0.299028 0.472469 0.228503 -> 0.472469 
 222 P E 0.104730 0.266240 0.629030 -> 0.629030 
 223 H E 0.066415 0.369221 0.564363 -> 0.564363 
 224 L B 0.430348 0.324631 0.245021 -> 0.430348 
 225 S M 0.327434 0.457546 0.215020 -> 0.457546 
 226 A B 0.690106 0.162678 0.147216 -> 0.690106 
 227 V M 0.407723 0.473000 0.119277 -> 0.473000 
 228 E M 0.232596 0.500891 0.266513 -> 0.500891 
 229 F B 0.838176 0.127866 0.033958 -> 0.838176 
 230 H B 0.647144 0.302237 0.050619 -> 0.647144 
 231 S B 0.504575 0.403188 0.092237 -> 0.504575 
 232 A B 0.912965 0.057402 0.029633 -> 0.912965 
 233 W B 0.751833 0.238441 0.009726 -> 0.751833 
 234 A B 0.947048 0.045543 0.007409 -> 0.947048 
 235 M B 0.536082 0.423131 0.040787 -> 0.536082 
 236 G B 0.773699 0.199055 0.027246 -> 0.773699 
 237 M B 0.693298 0.275848 0.030854 -> 0.693298 
 238 R M 0.206813 0.568644 0.224543 -> 0.568644 
 239 V B 0.845365 0.140790 0.013845 -> 0.845365 
 240 N B 0.731207 0.254857 0.013936 -> 0.731207 
 241 F B 0.885012 0.107608 0.007380 -> 0.885012 
 242 L B 0.938262 0.053261 0.008477 -> 0.938262 
 243 A B 0.898242 0.093937 0.007820 -> 0.898242 
 244 S B 0.883226 0.105990 0.010784 -> 0.883226 
 245 N B 0.493549 0.319387 0.187065 -> 0.493549 
 246 I M 0.390203 0.508923 0.100874 -> 0.508923 
 247 H M 0.199257 0.468999 0.331744 -> 0.468999 
 248 Y M 0.108353 0.520928 0.370719 -> 0.520928 
 249 P E 0.095092 0.312550 0.592358 -> 0.592358 
 250 S E 0.074420 0.326010 0.599570 -> 0.599570 
 251 K E 0.038844 0.240732 0.720424 -> 0.720424 
 252 K E 0.078590 0.389135 0.532275 -> 0.532275 
 253 M B 0.644205 0.273796 0.081999 -> 0.644205 
 254 T B 0.717851 0.216836 0.065313 -> 0.717851 
 255 G B 0.625872 0.291598 0.082530 -> 0.625872 
 256 S B 0.912327 0.083050 0.004623 -> 0.912327 
 257 G B 0.884145 0.107594 0.008261 -> 0.884145 
 258 I B 0.969020 0.030420 0.000560 -> 0.969020 
 259 Y B 0.644189 0.335341 0.020470 -> 0.644189 
 260 A B 0.812870 0.176380 0.010749 -> 0.812870 
 261 P E 0.130421 0.422194 0.447385 -> 0.447385 
 262 N E 0.006990 0.130536 0.862474 -> 0.862474 
 263 S M 0.127646 0.492491 0.379863 -> 0.492491 
 264 S M 0.162959 0.424347 0.412694 -> 0.424347 
 265 R M 0.104227 0.568129 0.327644 -> 0.568129 
 266 A B 0.740123 0.223738 0.036139 -> 0.740123 
 267 F M 0.334432 0.478838 0.186730 -> 0.478838 
 268 H M 0.109033 0.521062 0.369905 -> 0.521062 
 269 Y M 0.242466 0.638311 0.119223 -> 0.638311 
 270 D E 0.062522 0.438204 0.499274 -> 0.499274 
 271 M M 0.215240 0.502503 0.282257 -> 0.502503 
 272 K E 0.003795 0.104588 0.891617 -> 0.891617 
 273 T E 0.042951 0.425828 0.531221 -> 0.531221 
 274 E E 0.005162 0.140692 0.854146 -> 0.854146 
 275 E E 0.006830 0.107533 0.885637 -> 0.885637 
 276 G E 0.172773 0.363849 0.463378 -> 0.463378 
 277 K M 0.085522 0.749653 0.164825 -> 0.749653 
 278 L B 0.873269 0.122614 0.004117 -> 0.873269 
 279 L B 0.877238 0.117591 0.005171 -> 0.877238 
 280 L B 0.641650 0.345035 0.013315 -> 0.641650 
 281 S B 0.757177 0.205064 0.037760 -> 0.757177 
 282 Q M 0.086019 0.503367 0.410613 -> 0.503367 
 283 L B 0.737725 0.229605 0.032670 -> 0.737725 
 284 D M 0.083357 0.550310 0.366333 -> 0.550310 
 285 S E 0.044770 0.245594 0.709636 -> 0.709636 
 286 H E 0.021075 0.296637 0.682288 -> 0.682288 
 287 P E 0.012989 0.138736 0.848275 -> 0.848275 
 288 S E 0.000939 0.018939 0.980122 -> 0.980122 
