# Supplementary material for: AcconPred: Predicting Solvent Accessibility and Contact Number Simultaneously by a Multitask Learning Framework under the Conditional Neural Fields Model
Source: Biomed Res Int. 2015 Aug 3;2015:678764. doi: 10.1155/2015/678764 (PMC4538422; doi:10.1155/2015/678764)
Supplement: Supplementary file 1 — Training/testing dataset as well as the CASP11 evaluation dataset could be found in the Supplementary Material. The CASP11 evaluation dataset contains all detailed results from SPINE-X, SANN, ACCpro5 and AcconPred. [file 678764.f1.zip › Supplmentary_Files/105_casp11_domain/casp11_domain_AcconPred/T0794-D2.reso]

# AcconPred: three-state solvent accessibility prediction results 
# probabilities are in the order of B (Bury, pACC: 0-10), M (Medium, pACC: 11-40) and E (Exposed, pACC: 41-100), 
# where pACC is the relative solvent accessibility value calculated by DSSP 
# output format: <position> <one letter amino acid> <predicted label> ... <probabilities> ... -> <maximal probability> 

 1 A E 0.004964 0.039144 0.955892 -> 0.955892 
 2 V E 0.018333 0.179383 0.802284 -> 0.802284 
 3 V M 0.204178 0.517089 0.278733 -> 0.517089 
 4 N E 0.037679 0.265175 0.697146 -> 0.697146 
 5 W M 0.377145 0.528975 0.093880 -> 0.528975 
 6 T E 0.134327 0.410352 0.455322 -> 0.455322 
 7 S B 0.480853 0.332557 0.186590 -> 0.480853 
 8 Y M 0.367064 0.494351 0.138585 -> 0.494351 
 9 A B 0.768150 0.165432 0.066418 -> 0.768150 
 10 S E 0.201792 0.397657 0.400551 -> 0.400551 
 11 S E 0.153603 0.341278 0.505119 -> 0.505119 
 12 I M 0.315506 0.480532 0.203963 -> 0.480532 
 13 E E 0.014935 0.179668 0.805397 -> 0.805397 
 14 A E 0.091990 0.331560 0.576449 -> 0.576449 
 15 L M 0.226158 0.509771 0.264071 -> 0.509771 
 16 S E 0.115012 0.408333 0.476656 -> 0.476656 
 17 S E 0.029281 0.190581 0.780138 -> 0.780138 
 18 G E 0.018735 0.166857 0.814409 -> 0.814409 
 19 N E 0.036613 0.349950 0.613437 -> 0.613437 
 20 K E 0.011810 0.158673 0.829517 -> 0.829517 
 21 E E 0.029507 0.355695 0.614798 -> 0.614798 
 22 F B 0.826400 0.161692 0.011908 -> 0.826400 
 23 K E 0.024221 0.468054 0.507724 -> 0.507724 
 24 G B 0.765094 0.194467 0.040439 -> 0.765094 
 25 T M 0.154689 0.628825 0.216486 -> 0.628825 
 26 V B 0.792875 0.171268 0.035856 -> 0.792875 
 27 F M 0.381551 0.484057 0.134392 -> 0.484057 
 28 F M 0.257911 0.472334 0.269755 -> 0.472334 
 29 D M 0.227484 0.487768 0.284748 -> 0.487768 
 30 E E 0.052854 0.311508 0.635638 -> 0.635638 
 31 F B 0.770617 0.208297 0.021087 -> 0.770617 
 32 T M 0.310292 0.491395 0.198313 -> 0.491395 
 33 F B 0.705844 0.255558 0.038598 -> 0.705844 
 34 V M 0.191237 0.650409 0.158355 -> 0.650409 
 35 K E 0.010433 0.276276 0.713291 -> 0.713291 
 36 L B 0.732407 0.254863 0.012730 -> 0.732407 
 37 T E 0.024810 0.322952 0.652238 -> 0.652238 
 38 G E 0.032259 0.241608 0.726133 -> 0.726133 
 39 V E 0.015341 0.189917 0.794742 -> 0.794742 
 40 A E 0.026781 0.187119 0.786100 -> 0.786100 
 41 G E 0.133467 0.376282 0.490250 -> 0.490250 
 42 N E 0.044406 0.438108 0.517486 -> 0.517486 
 43 Y M 0.343865 0.633790 0.022345 -> 0.633790 
 44 T M 0.095536 0.591905 0.312559 -> 0.591905 
 45 V B 0.741618 0.241561 0.016821 -> 0.741618 
 46 C B 0.542294 0.411791 0.045915 -> 0.542294 
 47 Q M 0.153772 0.628269 0.217960 -> 0.628269 
 48 K E 0.007428 0.181285 0.811287 -> 0.811287 
 49 D E 0.047617 0.341376 0.611006 -> 0.611006 
 50 L B 0.818311 0.164632 0.017057 -> 0.818311 
 51 C B 0.695511 0.283020 0.021469 -> 0.695511 
 52 C B 0.863629 0.110936 0.025435 -> 0.863629 
 53 H M 0.139117 0.665889 0.194994 -> 0.665889 
 54 L B 0.883984 0.105743 0.010273 -> 0.883984 
 55 S M 0.105351 0.616851 0.277798 -> 0.616851 
 56 Y B 0.551009 0.420484 0.028507 -> 0.551009 
 57 K E 0.003849 0.257682 0.738469 -> 0.738469 
 58 M M 0.405022 0.509497 0.085480 -> 0.509497 
 59 S M 0.079370 0.526877 0.393753 -> 0.526877 
 60 E E 0.014270 0.170627 0.815103 -> 0.815103 
 61 N E 0.007452 0.137693 0.854855 -> 0.854855 
 62 I M 0.172056 0.607327 0.220617 -> 0.607327 
 63 P E 0.013273 0.167288 0.819439 -> 0.819439 
 64 N E 0.005517 0.159875 0.834608 -> 0.834608 
 65 E M 0.159623 0.684524 0.155853 -> 0.684524 
 66 V B 0.558968 0.407346 0.033686 -> 0.558968 
 67 Y B 0.780730 0.210884 0.008386 -> 0.780730 
 68 A B 0.888011 0.108641 0.003348 -> 0.888011 
 69 L B 0.972871 0.025661 0.001467 -> 0.972871 
 70 G B 0.955156 0.042884 0.001960 -> 0.955156 
 71 A B 0.962677 0.034043 0.003280 -> 0.962677 
 72 F B 0.834659 0.155763 0.009577 -> 0.834659 
 73 D B 0.625888 0.333469 0.040643 -> 0.625888 
 74 G B 0.709162 0.223839 0.066999 -> 0.709162 
 75 L M 0.205749 0.518880 0.275371 -> 0.518880 
 76 H M 0.307744 0.532797 0.159459 -> 0.532797 
 77 T E 0.209920 0.376575 0.413505 -> 0.413505 
 78 V M 0.291515 0.417658 0.290827 -> 0.417658 
 79 E E 0.034996 0.287843 0.677160 -> 0.677160 
 80 G E 0.260874 0.367193 0.371933 -> 0.371933 
 81 R E 0.049220 0.468077 0.482702 -> 0.482702 
 82 Y B 0.558634 0.404396 0.036970 -> 0.558634 
 83 Y M 0.406194 0.535016 0.058790 -> 0.535016 
 84 L B 0.947961 0.049356 0.002683 -> 0.947961 
 85 Q B 0.578089 0.374067 0.047844 -> 0.578089 
 86 I B 0.933369 0.062039 0.004592 -> 0.933369 
 87 C B 0.879855 0.113774 0.006371 -> 0.879855 
 88 T B 0.873831 0.116119 0.010050 -> 0.873831 
 89 L B 0.885450 0.110221 0.004329 -> 0.885450 
 90 L B 0.903561 0.092473 0.003966 -> 0.903561 
 91 K M 0.197863 0.663659 0.138478 -> 0.663659 
 92 C B 0.840072 0.157968 0.001960 -> 0.840072 
 93 K E 0.005810 0.260575 0.733615 -> 0.733615 
 94 T E 0.067282 0.353908 0.578810 -> 0.578810 
 95 T E 0.016219 0.196407 0.787374 -> 0.787374 
 96 N E 0.027677 0.298505 0.673819 -> 0.673819 
 97 L M 0.282531 0.601305 0.116165 -> 0.601305 
 98 N E 0.027166 0.208482 0.764351 -> 0.764351 
 99 T M 0.239528 0.387559 0.372912 -> 0.387559 
 100 C B 0.497477 0.420802 0.081721 -> 0.497477 
 101 G B 0.408157 0.340387 0.251456 -> 0.408157 
 102 D E 0.042843 0.331519 0.625638 -> 0.625638 
 103 S E 0.037817 0.359093 0.603090 -> 0.603090 
 104 A B 0.627277 0.316144 0.056579 -> 0.627277 
 105 E E 0.026565 0.277381 0.696054 -> 0.696054 
 106 T E 0.022584 0.224343 0.753073 -> 0.753073 
 107 A B 0.452921 0.376368 0.170711 -> 0.452921 
 108 S E 0.045391 0.448181 0.506427 -> 0.506427 
 109 T M 0.293066 0.487828 0.219106 -> 0.487828 
 110 R M 0.024649 0.515361 0.459990 -> 0.515361 
 111 F B 0.806969 0.183756 0.009275 -> 0.806969 
 112 E E 0.028658 0.471291 0.500051 -> 0.500051 
 113 M M 0.086685 0.599672 0.313642 -> 0.599672 
 114 F B 0.857421 0.133239 0.009339 -> 0.857421 
 115 S M 0.198893 0.679766 0.121340 -> 0.679766 
 116 L B 0.953261 0.042206 0.004533 -> 0.953261 
 117 S M 0.080221 0.643321 0.276458 -> 0.643321 
 118 G B 0.853117 0.137016 0.009867 -> 0.853117 
 119 T E 0.023203 0.379523 0.597273 -> 0.597273 
 120 F B 0.781156 0.199401 0.019443 -> 0.781156 
 121 G E 0.011099 0.214513 0.774388 -> 0.774388 
 122 T E 0.010998 0.197573 0.791429 -> 0.791429 
 123 Q E 0.017924 0.316905 0.665171 -> 0.665171 
 124 Y M 0.247957 0.659088 0.092955 -> 0.659088 
 125 V B 0.570289 0.349960 0.079751 -> 0.570289 
 126 F B 0.840116 0.132456 0.027429 -> 0.840116 
 127 P B 0.740541 0.208370 0.051089 -> 0.740541 
 128 E M 0.320300 0.455078 0.224622 -> 0.455078 
 129 V B 0.704524 0.238046 0.057431 -> 0.704524 
 130 L B 0.777547 0.189198 0.033255 -> 0.777547 
 131 L M 0.247971 0.550162 0.201868 -> 0.550162 
 132 S M 0.142275 0.449221 0.408505 -> 0.449221 
 133 E E 0.016200 0.205168 0.778632 -> 0.778632 
 134 N B 0.429664 0.371312 0.199024 -> 0.429664 
 135 Q M 0.116869 0.558043 0.325088 -> 0.558043 
 136 L B 0.791080 0.191295 0.017624 -> 0.791080 
 137 A M 0.142454 0.461785 0.395761 -> 0.461785 
 138 P E 0.145011 0.421747 0.433242 -> 0.433242 
 139 G E 0.041389 0.231002 0.727609 -> 0.727609 
 140 E E 0.010355 0.185200 0.804445 -> 0.804445 
 141 F M 0.348096 0.548735 0.103170 -> 0.548735 
 142 Q E 0.029050 0.314432 0.656518 -> 0.656518 
 143 V M 0.314740 0.546230 0.139030 -> 0.546230 
 144 S M 0.317183 0.539551 0.143266 -> 0.539551 
 145 T E 0.039685 0.255945 0.704370 -> 0.704370 
 146 D E 0.028683 0.218669 0.752648 -> 0.752648 
 147 G E 0.133439 0.330885 0.535675 -> 0.535675 
 148 R E 0.065690 0.434897 0.499413 -> 0.499413 
 149 L M 0.284861 0.484387 0.230753 -> 0.484387 
 150 F M 0.186865 0.473646 0.339488 -> 0.473646 
 151 S M 0.159781 0.457998 0.382221 -> 0.457998 
 152 L E 0.080084 0.349559 0.570357 -> 0.570357 
 153 K E 0.018858 0.254893 0.726250 -> 0.726250 
 154 P E 0.036995 0.190329 0.772676 -> 0.772676 
 155 T M 0.155613 0.444033 0.400354 -> 0.444033 
 156 S E 0.033531 0.185273 0.781196 -> 0.781196 
 157 G M 0.067531 0.467874 0.464595 -> 0.467874 
 158 P M 0.143524 0.526633 0.329844 -> 0.526633 
 159 V B 0.856677 0.130030 0.013293 -> 0.856677 
 160 L B 0.903042 0.090584 0.006374 -> 0.903042 
 161 T B 0.791591 0.187082 0.021327 -> 0.791591 
 162 V B 0.987227 0.011658 0.001114 -> 0.987227 
 163 T B 0.922151 0.070293 0.007556 -> 0.922151 
 164 L B 0.985908 0.013380 0.000712 -> 0.985908 
 165 F B 0.785078 0.204015 0.010908 -> 0.785078 
 166 G B 0.895341 0.089078 0.015581 -> 0.895341 
 167 R M 0.346706 0.531322 0.121972 -> 0.531322 
 168 L M 0.301992 0.533211 0.164798 -> 0.533211 
 169 Y B 0.509534 0.416951 0.073515 -> 0.509534 
 170 E E 0.071265 0.448402 0.480333 -> 0.480333 
 171 K E 0.005598 0.121560 0.872842 -> 0.872842 
 172 D E 0.003491 0.041311 0.955197 -> 0.955197 
