# Supplementary material for: AcconPred: Predicting Solvent Accessibility and Contact Number Simultaneously by a Multitask Learning Framework under the Conditional Neural Fields Model
Source: Biomed Res Int. 2015 Aug 3;2015:678764. doi: 10.1155/2015/678764 (PMC4538422; doi:10.1155/2015/678764)
Supplement: Supplementary file 1 — Training/testing dataset as well as the CASP11 evaluation dataset could be found in the Supplementary Material. The CASP11 evaluation dataset contains all detailed results from SPINE-X, SANN, ACCpro5 and AcconPred. [file 678764.f1.zip › Supplmentary_Files/105_casp11_domain/casp11_domain_AcconPred/T0796-D1.reso]

# AcconPred: three-state solvent accessibility prediction results 
# probabilities are in the order of B (Bury, pACC: 0-10), M (Medium, pACC: 11-40) and E (Exposed, pACC: 41-100), 
# where pACC is the relative solvent accessibility value calculated by DSSP 
# output format: <position> <one letter amino acid> <predicted label> ... <probabilities> ... -> <maximal probability> 

 1 A E 0.008364 0.042964 0.948672 -> 0.948672 
 2 I E 0.076319 0.377931 0.545750 -> 0.545750 
 3 L M 0.167545 0.510826 0.321629 -> 0.510826 
 4 D E 0.015230 0.220607 0.764163 -> 0.764163 
 5 L M 0.353084 0.479118 0.167798 -> 0.479118 
 6 K E 0.010698 0.229735 0.759567 -> 0.759567 
 7 S E 0.090367 0.372019 0.537615 -> 0.537615 
 8 L B 0.631532 0.315322 0.053146 -> 0.631532 
 9 V B 0.743091 0.177231 0.079678 -> 0.743091 
 10 L M 0.293494 0.448021 0.258485 -> 0.448021 
 11 N E 0.130652 0.389935 0.479413 -> 0.479413 
 12 A B 0.639350 0.238093 0.122558 -> 0.639350 
 13 I B 0.571829 0.288708 0.139463 -> 0.571829 
 14 N M 0.338025 0.400965 0.261011 -> 0.400965 
 15 Y M 0.400674 0.454922 0.144404 -> 0.454922 
 16 W B 0.610211 0.306650 0.083139 -> 0.610211 
 17 G B 0.757937 0.192079 0.049984 -> 0.757937 
 18 P M 0.363099 0.400694 0.236207 -> 0.400694 
 19 K E 0.087271 0.453780 0.458949 -> 0.458949 
 20 N E 0.219480 0.377535 0.402985 -> 0.402985 
 21 N E 0.148147 0.380597 0.471256 -> 0.471256 
 22 N E 0.123209 0.358215 0.518577 -> 0.518577 
 23 G E 0.178489 0.255343 0.566168 -> 0.566168 
 24 I M 0.428330 0.436718 0.134952 -> 0.436718 
 25 Q E 0.035339 0.199907 0.764754 -> 0.764754 
 26 G M 0.287987 0.422874 0.289139 -> 0.422874 
 27 G E 0.202662 0.382977 0.414362 -> 0.414362 
 28 D E 0.060587 0.371009 0.568404 -> 0.568404 
 29 F M 0.132544 0.436629 0.430827 -> 0.436629 
 30 G E 0.095282 0.262071 0.642647 -> 0.642647 
 31 Y M 0.147021 0.570890 0.282089 -> 0.570890 
 32 P E 0.158292 0.359888 0.481819 -> 0.481819 
 33 I B 0.489498 0.424595 0.085906 -> 0.489498 
 34 S E 0.084412 0.404835 0.510753 -> 0.510753 
 35 E E 0.044044 0.327483 0.628473 -> 0.628473 
 36 K E 0.022524 0.271646 0.705831 -> 0.705831 
 37 Q E 0.023910 0.226595 0.749494 -> 0.749494 
 38 I B 0.733155 0.250200 0.016645 -> 0.733155 
 39 D E 0.018266 0.381101 0.600632 -> 0.600632 
 40 T M 0.444667 0.484798 0.070535 -> 0.484798 
 41 S M 0.104071 0.469818 0.426111 -> 0.469818 
 42 I M 0.292196 0.549482 0.158321 -> 0.549482 
 43 I B 0.468798 0.440756 0.090446 -> 0.468798 
 44 T E 0.123478 0.423254 0.453268 -> 0.453268 
 45 S M 0.295960 0.478800 0.225239 -> 0.478800 
 46 T E 0.200507 0.375292 0.424202 -> 0.424202 
 47 H M 0.177937 0.524196 0.297867 -> 0.524196 
 48 P E 0.147627 0.359247 0.493126 -> 0.493126 
 49 R E 0.017185 0.167171 0.815644 -> 0.815644 
 50 L E 0.087538 0.403979 0.508483 -> 0.508483 
 51 I B 0.618290 0.340884 0.040826 -> 0.618290 
 52 P E 0.153036 0.371714 0.475250 -> 0.475250 
 53 H M 0.217792 0.497907 0.284301 -> 0.497907 
 54 D E 0.007172 0.087365 0.905463 -> 0.905463 
 55 L M 0.088064 0.465323 0.446613 -> 0.465323 
 56 T E 0.086111 0.362205 0.551684 -> 0.551684 
 57 I M 0.342253 0.534081 0.123666 -> 0.534081 
 58 P E 0.011079 0.139947 0.848974 -> 0.848974 
 59 Q E 0.011606 0.198946 0.789449 -> 0.789449 
 60 N E 0.028461 0.307260 0.664278 -> 0.664278 
 61 L M 0.091287 0.521107 0.387606 -> 0.521107 
 62 E E 0.071884 0.463057 0.465059 -> 0.465059 
 63 T B 0.588364 0.348286 0.063350 -> 0.588364 
 64 I B 0.835855 0.154662 0.009483 -> 0.835855 
 65 F B 0.519853 0.423347 0.056800 -> 0.519853 
 66 T B 0.591585 0.315532 0.092883 -> 0.591585 
 67 T B 0.698460 0.260196 0.041343 -> 0.698460 
 68 T M 0.236254 0.566602 0.197144 -> 0.566602 
 69 Q B 0.596061 0.338867 0.065072 -> 0.596061 
 70 V M 0.369725 0.544633 0.085642 -> 0.544633 
 71 L B 0.967083 0.030874 0.002043 -> 0.967083 
 72 T M 0.237413 0.647439 0.115148 -> 0.647439 
 73 N B 0.933764 0.060742 0.005495 -> 0.933764 
 74 N E 0.046101 0.432375 0.521524 -> 0.521524 
 75 T M 0.335616 0.478879 0.185505 -> 0.478879 
 76 D E 0.015370 0.208245 0.776385 -> 0.776385 
 77 L M 0.092521 0.601343 0.306137 -> 0.601343 
 78 Q E 0.011551 0.088645 0.899804 -> 0.899804 
 79 Q M 0.374085 0.496023 0.129892 -> 0.496023 
 80 S E 0.045682 0.272371 0.681947 -> 0.681947 
 81 Q M 0.071601 0.628714 0.299685 -> 0.628714 
 82 T E 0.015949 0.241318 0.742733 -> 0.742733 
 83 V B 0.482788 0.480586 0.036626 -> 0.482788 
 84 S E 0.019416 0.306514 0.674070 -> 0.674070 
 85 F B 0.613381 0.360755 0.025864 -> 0.613381 
 86 A E 0.027775 0.427547 0.544678 -> 0.544678 
 87 K E 0.007809 0.256242 0.735948 -> 0.735948 
 88 K E 0.004832 0.116011 0.879157 -> 0.879157 
 89 T M 0.104289 0.601768 0.293943 -> 0.601768 
 90 T E 0.082020 0.405549 0.512431 -> 0.512431 
 91 T E 0.035549 0.290888 0.673564 -> 0.673564 
 92 T E 0.057120 0.417878 0.525003 -> 0.525003 
 93 T E 0.050077 0.388529 0.561394 -> 0.561394 
 94 S M 0.146227 0.547164 0.306610 -> 0.547164 
 95 T E 0.029137 0.296721 0.674141 -> 0.674141 
 96 S M 0.108886 0.488680 0.402434 -> 0.488680 
 97 T M 0.073137 0.496327 0.430536 -> 0.496327 
 98 T E 0.036837 0.310137 0.653027 -> 0.653027 
 99 N M 0.062606 0.518726 0.418668 -> 0.518726 
 100 G E 0.294700 0.314406 0.390895 -> 0.390895 
 101 W B 0.671286 0.299217 0.029496 -> 0.671286 
 102 T E 0.052072 0.308704 0.639225 -> 0.639225 
 103 E E 0.041751 0.384245 0.574004 -> 0.574004 
 104 G E 0.046364 0.269848 0.683788 -> 0.683788 
 105 G M 0.117409 0.541887 0.340703 -> 0.541887 
 106 K E 0.005694 0.101146 0.893160 -> 0.893160 
 107 I B 0.517390 0.450007 0.032603 -> 0.517390 
 108 S E 0.037795 0.337476 0.624729 -> 0.624729 
 109 D E 0.069408 0.398664 0.531928 -> 0.531928 
 110 T E 0.035899 0.361820 0.602282 -> 0.602282 
 111 L M 0.437952 0.524407 0.037641 -> 0.524407 
 112 E E 0.010691 0.240001 0.749308 -> 0.749308 
 113 E M 0.333355 0.548538 0.118107 -> 0.548538 
 114 K E 0.001998 0.130782 0.867220 -> 0.867220 
 115 V B 0.784167 0.207484 0.008348 -> 0.784167 
 116 S E 0.044003 0.445006 0.510991 -> 0.510991 
 117 V B 0.859620 0.136786 0.003594 -> 0.859620 
 118 S E 0.027485 0.465634 0.506881 -> 0.506881 
 119 I B 0.764546 0.227765 0.007690 -> 0.764546 
 120 P M 0.121437 0.503809 0.374754 -> 0.503809 
 121 F M 0.361400 0.470178 0.168422 -> 0.470178 
 122 I M 0.410263 0.478541 0.111196 -> 0.478541 
 123 G B 0.421043 0.370284 0.208674 -> 0.421043 
 124 E E 0.053735 0.341367 0.604899 -> 0.604899 
 125 G M 0.151340 0.442606 0.406054 -> 0.442606 
 126 G E 0.034217 0.217837 0.747946 -> 0.747946 
 127 G M 0.158052 0.551639 0.290309 -> 0.551639 
 128 K E 0.006675 0.136063 0.857262 -> 0.857262 
 129 N M 0.200067 0.603820 0.196113 -> 0.603820 
 130 S E 0.035010 0.337035 0.627956 -> 0.627956 
 131 T M 0.466351 0.480215 0.053434 -> 0.480215 
 132 T E 0.025893 0.350132 0.623976 -> 0.623976 
 133 I B 0.682389 0.302305 0.015306 -> 0.682389 
 134 E E 0.005602 0.250807 0.743591 -> 0.743591 
 135 A B 0.671170 0.303727 0.025103 -> 0.671170 
 136 N E 0.031621 0.482058 0.486320 -> 0.486320 
 137 F B 0.575893 0.357242 0.066865 -> 0.575893 
 138 A E 0.078311 0.446985 0.474704 -> 0.474704 
 139 H M 0.186065 0.615438 0.198497 -> 0.615438 
 140 N E 0.017686 0.305892 0.676422 -> 0.676422 
 141 S E 0.049676 0.358914 0.591410 -> 0.591410 
 142 S E 0.009020 0.213973 0.777007 -> 0.777007 
 143 T E 0.005504 0.121937 0.872559 -> 0.872559 
 144 T M 0.127837 0.586450 0.285713 -> 0.586450 
 145 T E 0.005770 0.143706 0.850523 -> 0.850523 
 146 F M 0.250814 0.634484 0.114703 -> 0.634484 
 147 Q E 0.006175 0.201271 0.792554 -> 0.792554 
 148 Q E 0.027198 0.334675 0.638127 -> 0.638127 
 149 A E 0.054177 0.435838 0.509985 -> 0.509985 
 150 S M 0.087183 0.493072 0.419745 -> 0.493072 
 151 T E 0.037996 0.415442 0.546563 -> 0.546563 
 152 D E 0.005871 0.147833 0.846297 -> 0.846297 
 153 I M 0.202065 0.689174 0.108761 -> 0.689174 
 154 E E 0.006278 0.190940 0.802782 -> 0.802782 
 155 W M 0.280851 0.636383 0.082766 -> 0.636383 
 156 N E 0.034732 0.340087 0.625180 -> 0.625180 
 157 I B 0.533702 0.416246 0.050052 -> 0.533702 
 158 S E 0.063995 0.342287 0.593718 -> 0.593718 
 159 Q M 0.291136 0.561869 0.146995 -> 0.561869 
 160 P E 0.020239 0.250238 0.729523 -> 0.729523 
 161 V B 0.626443 0.347211 0.026346 -> 0.626443 
 162 L E 0.023713 0.288864 0.687423 -> 0.687423 
 163 V B 0.731128 0.251830 0.017042 -> 0.731128 
 164 P M 0.231509 0.579357 0.189135 -> 0.579357 
 165 P E 0.126816 0.333137 0.540047 -> 0.540047 
 166 R E 0.016158 0.207744 0.776098 -> 0.776098 
 167 K M 0.038041 0.513871 0.448088 -> 0.513871 
 168 Q E 0.012831 0.201569 0.785600 -> 0.785600 
 169 V M 0.317309 0.616883 0.065808 -> 0.616883 
 170 V M 0.080459 0.481142 0.438399 -> 0.481142 
 171 A B 0.948426 0.048466 0.003108 -> 0.948426 
 172 T M 0.185533 0.686788 0.127679 -> 0.686788 
 173 L B 0.945139 0.052124 0.002737 -> 0.945139 
 174 V M 0.322774 0.611280 0.065946 -> 0.611280 
 175 I B 0.922308 0.071298 0.006393 -> 0.922308 
 176 M M 0.272580 0.653573 0.073847 -> 0.653573 
 177 G E 0.062652 0.280024 0.657324 -> 0.657324 
 178 G B 0.476478 0.436845 0.086677 -> 0.476478 
 179 N E 0.013344 0.244173 0.742483 -> 0.742483 
 180 F B 0.809974 0.183151 0.006875 -> 0.809974 
 181 T M 0.045452 0.517507 0.437041 -> 0.517507 
 182 I B 0.840512 0.149576 0.009912 -> 0.840512 
 183 P M 0.121169 0.631886 0.246944 -> 0.631886 
 184 M B 0.886378 0.106900 0.006722 -> 0.886378 
 185 D M 0.092185 0.668799 0.239016 -> 0.668799 
 186 L B 0.890756 0.099220 0.010024 -> 0.890756 
 187 M M 0.126107 0.735066 0.138827 -> 0.735066 
 188 T B 0.901789 0.085188 0.013023 -> 0.901789 
 189 T M 0.156045 0.651503 0.192452 -> 0.651503 
 190 I B 0.899970 0.090713 0.009317 -> 0.899970 
 191 D M 0.067345 0.527967 0.404688 -> 0.527967 
 192 S B 0.517782 0.390924 0.091294 -> 0.517782 
 193 T E 0.027123 0.299234 0.673643 -> 0.673643 
 194 E M 0.166728 0.538005 0.295267 -> 0.538005 
 195 H E 0.090111 0.411429 0.498460 -> 0.498460 
 196 Y B 0.519719 0.395086 0.085195 -> 0.519719 
 197 S B 0.436364 0.365636 0.198000 -> 0.436364 
 198 G B 0.687208 0.200463 0.112329 -> 0.687208 
 199 Y B 0.575113 0.347570 0.077317 -> 0.575113 
 200 P B 0.836536 0.124543 0.038922 -> 0.836536 
 201 I B 0.777788 0.191868 0.030344 -> 0.777788 
 202 L B 0.758245 0.196650 0.045105 -> 0.758245 
 203 T B 0.811026 0.152999 0.035975 -> 0.811026 
 204 W B 0.511734 0.381019 0.107247 -> 0.511734 
 205 I B 0.710108 0.246504 0.043389 -> 0.710108 
 206 S B 0.785096 0.180487 0.034417 -> 0.785096 
 207 S B 0.589105 0.345556 0.065340 -> 0.589105 
 208 P E 0.125793 0.385706 0.488501 -> 0.488501 
 209 D E 0.098720 0.310694 0.590586 -> 0.590586 
 210 N M 0.196148 0.412811 0.391040 -> 0.412811 
 211 S E 0.159813 0.338741 0.501446 -> 0.501446 
 212 Y E 0.150808 0.409241 0.439950 -> 0.439950 
 213 N E 0.080728 0.357272 0.562000 -> 0.562000 
 214 G M 0.425533 0.459237 0.115230 -> 0.459237 
 215 P B 0.375063 0.369333 0.255604 -> 0.375063 
 216 F B 0.705444 0.256977 0.037579 -> 0.705444 
 217 M B 0.872072 0.100822 0.027105 -> 0.872072 
 218 S B 0.716374 0.225250 0.058376 -> 0.716374 
 219 W B 0.490835 0.390062 0.119103 -> 0.490835 
 220 Y M 0.211533 0.551672 0.236795 -> 0.551672 
 221 F B 0.426314 0.418801 0.154885 -> 0.426314 
 222 A B 0.528617 0.293173 0.178210 -> 0.528617 
 223 N E 0.091357 0.257152 0.651491 -> 0.651491 
 224 W M 0.336678 0.479989 0.183333 -> 0.479989 
 225 P E 0.237395 0.305744 0.456860 -> 0.456860 
 226 N E 0.047187 0.194452 0.758362 -> 0.758362 
 227 L M 0.239178 0.607564 0.153258 -> 0.607564 
 228 P E 0.148471 0.361676 0.489853 -> 0.489853 
 229 S E 0.096858 0.320076 0.583066 -> 0.583066 
 230 G E 0.145826 0.244683 0.609491 -> 0.609491 
 231 F M 0.292405 0.493163 0.214432 -> 0.493163 
 232 G E 0.183369 0.371580 0.445051 -> 0.445051 
 233 P E 0.172767 0.367663 0.459570 -> 0.459570 
 234 L E 0.069714 0.380901 0.549385 -> 0.549385 
 235 N E 0.029660 0.301503 0.668837 -> 0.668837 
 236 S E 0.182716 0.384986 0.432298 -> 0.432298 
 237 D E 0.016828 0.143177 0.839995 -> 0.839995 
 238 N E 0.062626 0.357046 0.580328 -> 0.580328 
 239 T M 0.222029 0.524737 0.253234 -> 0.524737 
 240 V B 0.664983 0.297212 0.037806 -> 0.664983 
 241 T E 0.105900 0.446544 0.447556 -> 0.447556 
 242 Y B 0.631320 0.358034 0.010646 -> 0.631320 
 243 T E 0.031391 0.436015 0.532594 -> 0.532594 
 244 G B 0.635176 0.327050 0.037774 -> 0.635176 
 245 S M 0.234705 0.472474 0.292821 -> 0.472474 
 246 V B 0.746931 0.211967 0.041103 -> 0.746931 
 247 V M 0.291327 0.535457 0.173216 -> 0.535457 
 248 S B 0.747747 0.213900 0.038353 -> 0.747747 
 249 Q E 0.043403 0.395661 0.560936 -> 0.560936 
 250 V B 0.495422 0.385409 0.119170 -> 0.495422 
 251 S M 0.173704 0.480255 0.346041 -> 0.480255 
 252 A M 0.236997 0.417899 0.345105 -> 0.417899 
 253 G M 0.332711 0.337070 0.330219 -> 0.337070 
 254 V B 0.536862 0.359531 0.103607 -> 0.536862 
 255 Y M 0.288670 0.571964 0.139366 -> 0.571964 
 256 A B 0.859084 0.117980 0.022936 -> 0.859084 
 257 T B 0.627470 0.298262 0.074268 -> 0.627470 
 258 V B 0.944361 0.046596 0.009043 -> 0.944361 
 259 R M 0.114754 0.703797 0.181449 -> 0.703797 
 260 F B 0.774509 0.213150 0.012341 -> 0.774509 
 261 D M 0.121400 0.628139 0.250461 -> 0.628139 
 262 Q B 0.417324 0.381706 0.200970 -> 0.417324 
 263 Y M 0.126573 0.656959 0.216468 -> 0.656959 
 264 D E 0.119655 0.372113 0.508232 -> 0.508232 
 265 I M 0.417776 0.466824 0.115400 -> 0.466824 
 266 H E 0.037609 0.254705 0.707686 -> 0.707686 
 267 N E 0.067309 0.336171 0.596520 -> 0.596520 
 268 L M 0.323117 0.510121 0.166762 -> 0.510121 
 269 R E 0.015983 0.169064 0.814953 -> 0.814953 
 270 T M 0.163872 0.429981 0.406147 -> 0.429981 
 271 I E 0.061261 0.402090 0.536649 -> 0.536649 
 272 E E 0.012295 0.200079 0.787626 -> 0.787626 
 273 K E 0.030076 0.385321 0.584604 -> 0.584604 
 274 T M 0.092720 0.458170 0.449111 -> 0.458170 
 275 W M 0.423500 0.523752 0.052748 -> 0.523752 
 276 Y M 0.305039 0.558253 0.136709 -> 0.558253 
 277 A B 0.696203 0.235313 0.068484 -> 0.696203 
 278 R E 0.039020 0.377885 0.583095 -> 0.583095 
 279 H M 0.265265 0.544667 0.190068 -> 0.544667 
 280 A B 0.744815 0.200867 0.054318 -> 0.744815 
 281 T B 0.409645 0.407151 0.183204 -> 0.409645 
 282 L B 0.555803 0.348082 0.096115 -> 0.555803 
 283 H M 0.087287 0.489775 0.422938 -> 0.489775 
 284 N E 0.053390 0.220011 0.726599 -> 0.726599 
 285 G E 0.249991 0.350935 0.399073 -> 0.399073 
 286 K E 0.018977 0.218739 0.762284 -> 0.762284 
 287 K E 0.029101 0.245763 0.725136 -> 0.725136 
 288 I B 0.541121 0.418040 0.040839 -> 0.541121 
 289 S M 0.169830 0.420807 0.409363 -> 0.420807 
 290 I M 0.386733 0.466699 0.146568 -> 0.466699 
 291 N E 0.073762 0.452388 0.473850 -> 0.473850 
 292 N E 0.050875 0.305071 0.644054 -> 0.644054 
 293 V M 0.302280 0.469635 0.228084 -> 0.469635 
 294 T E 0.045933 0.272060 0.682007 -> 0.682007 
 295 E E 0.008686 0.118565 0.872750 -> 0.872750 
 296 M E 0.009421 0.141162 0.849417 -> 0.849417 
