# Supplementary material for: AcconPred: Predicting Solvent Accessibility and Contact Number Simultaneously by a Multitask Learning Framework under the Conditional Neural Fields Model
Source: Biomed Res Int. 2015 Aug 3;2015:678764. doi: 10.1155/2015/678764 (PMC4538422; doi:10.1155/2015/678764)
Supplement: Supplementary file 1 — Training/testing dataset as well as the CASP11 evaluation dataset could be found in the Supplementary Material. The CASP11 evaluation dataset contains all detailed results from SPINE-X, SANN, ACCpro5 and AcconPred. [file 678764.f1.zip › Supplmentary_Files/105_casp11_domain/casp11_domain_AcconPred/T0800-D1.reso]

# AcconPred: three-state solvent accessibility prediction results 
# probabilities are in the order of B (Bury, pACC: 0-10), M (Medium, pACC: 11-40) and E (Exposed, pACC: 41-100), 
# where pACC is the relative solvent accessibility value calculated by DSSP 
# output format: <position> <one letter amino acid> <predicted label> ... <probabilities> ... -> <maximal probability> 

 1 K E 0.004434 0.052312 0.943254 -> 0.943254 
 2 P E 0.022231 0.250614 0.727156 -> 0.727156 
 3 K E 0.001721 0.067378 0.930902 -> 0.930902 
 4 E E 0.004008 0.098666 0.897326 -> 0.897326 
 5 E E 0.005277 0.129706 0.865016 -> 0.865016 
 6 I M 0.135947 0.655458 0.208596 -> 0.655458 
 7 K E 0.002159 0.087820 0.910021 -> 0.910021 
 8 I M 0.172689 0.649044 0.178267 -> 0.649044 
 9 V M 0.232147 0.608539 0.159314 -> 0.608539 
 10 E E 0.031038 0.336613 0.632350 -> 0.632350 
 11 P E 0.059802 0.423043 0.517155 -> 0.517155 
 12 N E 0.005178 0.073490 0.921332 -> 0.921332 
 13 G E 0.036434 0.197244 0.766322 -> 0.766322 
 14 A M 0.132459 0.476846 0.390694 -> 0.476846 
 15 E E 0.007334 0.141139 0.851527 -> 0.851527 
 16 K E 0.009673 0.258557 0.731770 -> 0.731770 
 17 T M 0.287149 0.659296 0.053554 -> 0.659296 
 18 K E 0.005164 0.230887 0.763949 -> 0.763949 
 19 L B 0.948288 0.049361 0.002351 -> 0.948288 
 20 N M 0.048857 0.721074 0.230069 -> 0.721074 
 21 L B 0.923867 0.072272 0.003861 -> 0.923867 
 22 N E 0.018742 0.369942 0.611317 -> 0.611317 
 23 F M 0.403466 0.499146 0.097388 -> 0.499146 
 24 G E 0.041808 0.407362 0.550830 -> 0.550830 
 25 V M 0.137218 0.454867 0.407915 -> 0.454867 
 26 G B 0.696389 0.262587 0.041024 -> 0.696389 
 27 K E 0.013055 0.280663 0.706282 -> 0.706282 
 28 L B 0.954835 0.042754 0.002410 -> 0.954835 
 29 N M 0.047545 0.759916 0.192539 -> 0.759916 
 30 I B 0.926388 0.070427 0.003184 -> 0.926388 
 31 S M 0.067927 0.612079 0.319994 -> 0.612079 
 32 G E 0.053365 0.286867 0.659768 -> 0.659768 
 33 N E 0.049396 0.463186 0.487418 -> 0.487418 
 34 E E 0.042675 0.260750 0.696575 -> 0.696575 
 35 E E 0.025648 0.197292 0.777060 -> 0.777060 
 36 K E 0.014629 0.203055 0.782317 -> 0.782317 
 37 L M 0.266256 0.614114 0.119630 -> 0.614114 
 38 M B 0.778707 0.194698 0.026594 -> 0.778707 
 39 K M 0.069462 0.579573 0.350965 -> 0.579573 
 40 G B 0.676554 0.263515 0.059931 -> 0.676554 
 41 K E 0.031579 0.482300 0.486122 -> 0.486122 
 42 F B 0.700594 0.280580 0.018825 -> 0.700594 
 43 I M 0.087583 0.536333 0.376084 -> 0.536333 
 44 Y M 0.286600 0.604397 0.109003 -> 0.604397 
 45 S E 0.030432 0.343592 0.625975 -> 0.625975 
 46 E E 0.034523 0.272631 0.692846 -> 0.692846 
 47 N E 0.025300 0.178684 0.796016 -> 0.796016 
 48 E E 0.021949 0.250285 0.727766 -> 0.727766 
 49 W M 0.313559 0.527370 0.159071 -> 0.527370 
 50 K E 0.052629 0.415984 0.531387 -> 0.531387 
 51 P M 0.365785 0.444762 0.189453 -> 0.444762 
 52 E E 0.009312 0.193751 0.796937 -> 0.796937 
 53 I B 0.574275 0.404156 0.021569 -> 0.574275 
 54 K E 0.001894 0.116861 0.881245 -> 0.881245 
 55 Y M 0.155014 0.802331 0.042655 -> 0.802331 
 56 E E 0.005474 0.210253 0.784272 -> 0.784272 
 57 V M 0.391836 0.569831 0.038333 -> 0.569831 
 58 K E 0.003166 0.141935 0.854898 -> 0.854898 
 59 D E 0.034291 0.249359 0.716350 -> 0.716350 
 60 K E 0.005788 0.097590 0.896622 -> 0.896622 
 61 D E 0.019951 0.200609 0.779440 -> 0.779440 
 62 G B 0.588460 0.357985 0.053555 -> 0.588460 
 63 E M 0.052684 0.517537 0.429779 -> 0.517537 
 64 L B 0.880504 0.113042 0.006454 -> 0.880504 
 65 E M 0.034308 0.597870 0.367821 -> 0.597870 
 66 I B 0.764418 0.231699 0.003883 -> 0.764418 
 67 S E 0.022837 0.381458 0.595705 -> 0.595705 
 68 Q M 0.273711 0.599904 0.126385 -> 0.599904 
 69 P E 0.013887 0.130463 0.855651 -> 0.855651 
 70 G E 0.058453 0.231649 0.709898 -> 0.709898 
 71 L M 0.227669 0.539539 0.232791 -> 0.539539 
 72 K E 0.006596 0.135841 0.857563 -> 0.857563 
 73 S E 0.054645 0.286367 0.658988 -> 0.658988 
 74 G M 0.195381 0.482199 0.322420 -> 0.482199 
 75 N M 0.119690 0.471860 0.408450 -> 0.471860 
 76 V B 0.865316 0.125550 0.009134 -> 0.865316 
 77 S M 0.125706 0.490519 0.383775 -> 0.490519 
 78 L B 0.607408 0.342094 0.050498 -> 0.607408 
 79 N E 0.027067 0.301269 0.671665 -> 0.671665 
 80 N E 0.110958 0.397637 0.491405 -> 0.491405 
 81 K E 0.021004 0.253297 0.725699 -> 0.725699 
 82 R E 0.041441 0.298813 0.659745 -> 0.659745 
 83 N M 0.312613 0.543596 0.143791 -> 0.543596 
 84 E E 0.030808 0.413016 0.556176 -> 0.556176 
 85 W B 0.872901 0.123688 0.003411 -> 0.872901 
 86 N M 0.134243 0.762923 0.102834 -> 0.762923 
 87 I B 0.946140 0.052295 0.001565 -> 0.946140 
 88 N M 0.161432 0.753326 0.085242 -> 0.753326 
 89 L B 0.925392 0.067634 0.006974 -> 0.925392 
 90 N B 0.496667 0.446554 0.056779 -> 0.496667 
 91 E E 0.024857 0.221773 0.753371 -> 0.753371 
 92 K E 0.003364 0.097767 0.898869 -> 0.898869 
 93 I M 0.435487 0.518032 0.046481 -> 0.518032 
 94 P E 0.107411 0.417100 0.475489 -> 0.475489 
 95 T M 0.276068 0.577639 0.146294 -> 0.577639 
 96 E E 0.021167 0.405075 0.573758 -> 0.573758 
 97 I B 0.916259 0.081275 0.002466 -> 0.916259 
 98 K E 0.006215 0.317589 0.676196 -> 0.676196 
 99 L B 0.921292 0.076419 0.002289 -> 0.921292 
 100 S M 0.091123 0.589271 0.319607 -> 0.589271 
 101 L B 0.608470 0.323597 0.067933 -> 0.608470 
 102 G M 0.183681 0.515135 0.301184 -> 0.515135 
 103 T B 0.468007 0.368078 0.163915 -> 0.468007 
 104 G B 0.732921 0.234611 0.032468 -> 0.732921 
 105 E E 0.039186 0.472264 0.488550 -> 0.488550 
 106 F B 0.790546 0.203394 0.006060 -> 0.790546 
 107 K E 0.002745 0.298891 0.698364 -> 0.698364 
 108 A B 0.917017 0.080728 0.002255 -> 0.917017 
 109 D M 0.082141 0.732859 0.185000 -> 0.732859 
 110 L B 0.891010 0.101648 0.007342 -> 0.891010 
 111 S M 0.084409 0.571139 0.344451 -> 0.571139 
 112 K E 0.003362 0.090041 0.906597 -> 0.906597 
 113 I B 0.565288 0.398665 0.036047 -> 0.565288 
 114 N E 0.011182 0.236995 0.751824 -> 0.751824 
 115 L M 0.463875 0.509468 0.026657 -> 0.509468 
 116 K E 0.002058 0.186752 0.811189 -> 0.811189 
 117 E E 0.008837 0.255066 0.736096 -> 0.736096 
 118 L B 0.913579 0.083420 0.003002 -> 0.913579 
 119 N E 0.019017 0.425720 0.555262 -> 0.555262 
 120 V B 0.841189 0.150277 0.008534 -> 0.841189 
 121 G E 0.063761 0.464185 0.472055 -> 0.472055 
 122 M B 0.706781 0.268126 0.025094 -> 0.706781 
 123 G M 0.224450 0.508142 0.267408 -> 0.508142 
 124 V M 0.421703 0.446764 0.131532 -> 0.446764 
 125 G B 0.729740 0.232452 0.037808 -> 0.729740 
 126 K E 0.011342 0.301016 0.687642 -> 0.687642 
 127 V B 0.842665 0.152563 0.004772 -> 0.842665 
 128 D M 0.040808 0.689283 0.269909 -> 0.689283 
 129 L B 0.951714 0.047110 0.001176 -> 0.951714 
 130 D M 0.026081 0.566331 0.407587 -> 0.566331 
 131 I B 0.768722 0.217628 0.013650 -> 0.768722 
 132 S E 0.039195 0.385409 0.575396 -> 0.575396 
 133 G E 0.044707 0.236844 0.718449 -> 0.718449 
 134 N E 0.072802 0.369692 0.557506 -> 0.557506 
 135 Y M 0.168502 0.555835 0.275663 -> 0.555835 
 136 K E 0.006266 0.101789 0.891945 -> 0.891945 
 137 N M 0.095030 0.504020 0.400950 -> 0.504020 
 138 N E 0.033438 0.347133 0.619429 -> 0.619429 
 139 V B 0.762905 0.221393 0.015702 -> 0.762905 
 140 K E 0.008893 0.310401 0.680705 -> 0.680705 
 141 V B 0.922507 0.075098 0.002395 -> 0.922507 
 142 N M 0.080552 0.729589 0.189859 -> 0.729589 
 143 I B 0.935727 0.062371 0.001902 -> 0.935727 
 144 E E 0.018072 0.415944 0.565984 -> 0.565984 
 145 G B 0.761811 0.191718 0.046470 -> 0.761811 
 146 G M 0.343063 0.482007 0.174930 -> 0.482007 
 147 V B 0.528291 0.317967 0.153742 -> 0.528291 
 148 G B 0.588967 0.364775 0.046258 -> 0.588967 
 149 E E 0.011215 0.326874 0.661912 -> 0.661912 
 150 A B 0.946194 0.050299 0.003507 -> 0.946194 
 151 T M 0.117787 0.746841 0.135372 -> 0.746841 
 152 V B 0.967199 0.031989 0.000812 -> 0.967199 
 153 Y M 0.051817 0.752954 0.195229 -> 0.752954 
 154 L B 0.796009 0.192715 0.011276 -> 0.796009 
 155 P B 0.630190 0.314239 0.055571 -> 0.630190 
 156 K E 0.003362 0.071194 0.925443 -> 0.925443 
 157 S E 0.010438 0.102270 0.887292 -> 0.887292 
 158 I M 0.365185 0.584374 0.050441 -> 0.584374 
 159 G M 0.191778 0.444284 0.363939 -> 0.444284 
 160 V B 0.806310 0.187224 0.006465 -> 0.806310 
 161 K E 0.021621 0.430704 0.547675 -> 0.547675 
 162 I B 0.915552 0.083282 0.001166 -> 0.915552 
 163 K E 0.010119 0.370101 0.619780 -> 0.619780 
 164 A B 0.865305 0.131512 0.003184 -> 0.865305 
 165 E E 0.013708 0.285883 0.700409 -> 0.700409 
 166 K M 0.156035 0.460785 0.383179 -> 0.460785 
 167 G M 0.151872 0.481717 0.366412 -> 0.481717 
 168 V B 0.598092 0.331665 0.070243 -> 0.598092 
 169 G B 0.597013 0.326600 0.076387 -> 0.597013 
 170 A B 0.531969 0.352142 0.115889 -> 0.531969 
 171 V B 0.739319 0.244606 0.016076 -> 0.739319 
 172 N M 0.076472 0.555684 0.367844 -> 0.555684 
 173 A B 0.818867 0.164778 0.016355 -> 0.818867 
 174 N E 0.009513 0.220883 0.769604 -> 0.769604 
 175 G E 0.048913 0.217531 0.733556 -> 0.733556 
 176 F M 0.198274 0.565959 0.235767 -> 0.565959 
 177 I M 0.132658 0.510995 0.356347 -> 0.510995 
 178 V M 0.141582 0.520700 0.337719 -> 0.520700 
 179 E E 0.007115 0.149732 0.843153 -> 0.843153 
 180 G E 0.023060 0.173643 0.803297 -> 0.803297 
 181 E E 0.012343 0.156067 0.831591 -> 0.831591 
 182 N E 0.056751 0.304637 0.638612 -> 0.638612 
 183 I M 0.212781 0.561925 0.225293 -> 0.561925 
 184 Y M 0.109026 0.667273 0.223701 -> 0.667273 
 185 K E 0.011350 0.209349 0.779301 -> 0.779301 
 186 N B 0.608515 0.362846 0.028639 -> 0.608515 
 187 S E 0.045413 0.310515 0.644072 -> 0.644072 
 188 Q E 0.026859 0.196648 0.776493 -> 0.776493 
 189 Y M 0.246956 0.626535 0.126508 -> 0.626535 
 190 G E 0.038992 0.213077 0.747931 -> 0.747931 
 191 K E 0.007923 0.071491 0.920586 -> 0.920586 
 192 S E 0.066285 0.254870 0.678845 -> 0.678845 
 193 K E 0.006524 0.125564 0.867912 -> 0.867912 
 194 N E 0.039728 0.348015 0.612257 -> 0.612257 
 195 S M 0.131960 0.589738 0.278302 -> 0.589738 
 196 I B 0.816686 0.175522 0.007793 -> 0.816686 
 197 E M 0.052572 0.692184 0.255244 -> 0.692184 
 198 V B 0.973075 0.025512 0.001413 -> 0.973075 
 199 N M 0.161500 0.766734 0.071766 -> 0.766734 
 200 I B 0.969790 0.029400 0.000810 -> 0.969790 
 201 E M 0.030169 0.519135 0.450695 -> 0.519135 
 202 A B 0.830141 0.150103 0.019756 -> 0.830141 
 203 G M 0.311198 0.484860 0.203942 -> 0.484860 
 204 V M 0.330764 0.426761 0.242476 -> 0.426761 
 205 G B 0.692627 0.255365 0.052008 -> 0.692627 
 206 A M 0.114167 0.479488 0.406345 -> 0.479488 
 207 I B 0.875722 0.113044 0.011234 -> 0.875722 
 208 N E 0.017765 0.475896 0.506339 -> 0.506339 
 209 I B 0.624185 0.362337 0.013478 -> 0.624185 
 210 K E 0.007362 0.300677 0.691961 -> 0.691961 
 211 Q E 0.059853 0.404889 0.535258 -> 0.535258 
 212 K E 0.002846 0.032566 0.964588 -> 0.964588 
