# Supplementary material for: AcconPred: Predicting Solvent Accessibility and Contact Number Simultaneously by a Multitask Learning Framework under the Conditional Neural Fields Model
Source: Biomed Res Int. 2015 Aug 3;2015:678764. doi: 10.1155/2015/678764 (PMC4538422; doi:10.1155/2015/678764)
Supplement: Supplementary file 1 — Training/testing dataset as well as the CASP11 evaluation dataset could be found in the Supplementary Material. The CASP11 evaluation dataset contains all detailed results from SPINE-X, SANN, ACCpro5 and AcconPred. [file 678764.f1.zip › Supplmentary_Files/105_casp11_domain/casp11_domain_AcconPred/T0801-D1.reso]

# AcconPred: three-state solvent accessibility prediction results 
# probabilities are in the order of B (Bury, pACC: 0-10), M (Medium, pACC: 11-40) and E (Exposed, pACC: 41-100), 
# where pACC is the relative solvent accessibility value calculated by DSSP 
# output format: <position> <one letter amino acid> <predicted label> ... <probabilities> ... -> <maximal probability> 

 1 P E 0.008465 0.050154 0.941382 -> 0.941382 
 2 F M 0.171831 0.547033 0.281136 -> 0.547033 
 3 N E 0.044895 0.266704 0.688401 -> 0.688401 
 4 A E 0.037320 0.284018 0.678662 -> 0.678662 
 5 P E 0.127776 0.391374 0.480851 -> 0.480851 
 6 P E 0.022395 0.251321 0.726284 -> 0.726284 
 7 V B 0.624247 0.338535 0.037217 -> 0.624247 
 8 V E 0.025012 0.368433 0.606556 -> 0.606556 
 9 G E 0.024794 0.219510 0.755696 -> 0.755696 
 10 T E 0.012980 0.189694 0.797326 -> 0.797326 
 11 E B 0.705855 0.268892 0.025253 -> 0.705855 
 12 L B 0.577799 0.410346 0.011855 -> 0.577799 
 13 D E 0.006435 0.136368 0.857197 -> 0.857197 
 14 Y M 0.297487 0.689193 0.013320 -> 0.689193 
 15 M B 0.989723 0.008460 0.001817 -> 0.989723 
 16 Q M 0.079527 0.731339 0.189135 -> 0.731339 
 17 S E 0.012726 0.196671 0.790603 -> 0.790603 
 18 A B 0.790899 0.189530 0.019570 -> 0.790899 
 19 M B 0.767283 0.199405 0.033311 -> 0.767283 
 20 G E 0.032050 0.280192 0.687758 -> 0.687758 
 21 S E 0.080143 0.417516 0.502341 -> 0.502341 
 22 G E 0.100300 0.438594 0.461106 -> 0.461106 
 23 K E 0.050240 0.365510 0.584251 -> 0.584251 
 24 L B 0.633540 0.329507 0.036953 -> 0.633540 
 25 C B 0.772508 0.203752 0.023740 -> 0.772508 
 26 G M 0.291467 0.464650 0.243883 -> 0.464650 
 27 D E 0.032602 0.256704 0.710694 -> 0.710694 
 28 G M 0.290430 0.502653 0.206916 -> 0.502653 
 29 G E 0.123607 0.365429 0.510964 -> 0.510964 
 30 F M 0.465760 0.483654 0.050586 -> 0.483654 
 31 T B 0.838911 0.155191 0.005898 -> 0.838911 
 32 R E 0.013249 0.311757 0.674994 -> 0.674994 
 33 R E 0.007419 0.318158 0.674423 -> 0.674423 
 34 C B 0.986963 0.011069 0.001968 -> 0.986963 
 35 Q B 0.733484 0.254894 0.011622 -> 0.733484 
 36 Q E 0.013100 0.271695 0.715205 -> 0.715205 
 37 W M 0.141715 0.793642 0.064644 -> 0.793642 
 38 L B 0.995788 0.003382 0.000831 -> 0.995788 
 39 E M 0.112106 0.700184 0.187710 -> 0.700184 
 40 Q E 0.001905 0.042052 0.956042 -> 0.956042 
 41 R M 0.133360 0.743924 0.122716 -> 0.743924 
 42 F B 0.556477 0.426322 0.017201 -> 0.556477 
 43 G E 0.008412 0.080620 0.910968 -> 0.910968 
 44 S M 0.355876 0.616823 0.027301 -> 0.616823 
 45 A E 0.019440 0.227833 0.752727 -> 0.752727 
 46 K M 0.063031 0.751058 0.185910 -> 0.751058 
 47 V B 0.983488 0.016286 0.000227 -> 0.983488 
 48 L B 0.984770 0.014338 0.000892 -> 0.984770 
 49 L B 0.978178 0.020659 0.001163 -> 0.978178 
 50 T B 0.920237 0.076183 0.003580 -> 0.920237 
 51 P B 0.487716 0.431947 0.080337 -> 0.487716 
 52 S B 0.647762 0.294528 0.057710 -> 0.647762 
 53 C B 0.845191 0.147348 0.007461 -> 0.845191 
 54 T B 0.656834 0.302916 0.040249 -> 0.656834 
 55 A B 0.916599 0.072604 0.010797 -> 0.916599 
 56 S B 0.995413 0.003994 0.000593 -> 0.995413 
 57 L B 0.932184 0.066551 0.001265 -> 0.932184 
 58 E B 0.850037 0.136288 0.013675 -> 0.850037 
 59 M B 0.983514 0.012624 0.003862 -> 0.983514 
 60 A B 0.995646 0.004221 0.000133 -> 0.995646 
 61 A B 0.974779 0.023347 0.001874 -> 0.974779 
 62 L M 0.446683 0.514520 0.038797 -> 0.514520 
 63 L B 0.800624 0.183886 0.015490 -> 0.800624 
 64 L B 0.723572 0.270424 0.006004 -> 0.723572 
 65 D E 0.016573 0.322299 0.661128 -> 0.661128 
 66 I B 0.753247 0.224084 0.022668 -> 0.753247 
 67 Q E 0.009949 0.374454 0.615598 -> 0.615598 
 68 P E 0.006520 0.075010 0.918470 -> 0.918470 
 69 G E 0.024598 0.209801 0.765600 -> 0.765600 
 70 D M 0.481960 0.491283 0.026757 -> 0.491283 
 71 E M 0.190010 0.711679 0.098311 -> 0.711679 
 72 V B 0.977587 0.021346 0.001067 -> 0.977587 
 73 I B 0.977745 0.020420 0.001835 -> 0.977745 
 74 M B 0.988999 0.009070 0.001932 -> 0.988999 
 75 P B 0.883057 0.110025 0.006918 -> 0.883057 
 76 S B 0.485762 0.448462 0.065776 -> 0.485762 
 77 Y B 0.570776 0.332507 0.096716 -> 0.570776 
 78 T B 0.790689 0.185937 0.023375 -> 0.790689 
 79 F B 0.911971 0.080034 0.007996 -> 0.911971 
 80 V B 0.782502 0.203835 0.013663 -> 0.782502 
 81 S B 0.923408 0.069371 0.007220 -> 0.923408 
 82 T B 0.974636 0.023025 0.002338 -> 0.974636 
 83 A B 0.935699 0.061930 0.002371 -> 0.935699 
 84 N B 0.518971 0.437700 0.043328 -> 0.518971 
 85 A B 0.954512 0.040676 0.004812 -> 0.954512 
 86 F B 0.982834 0.015527 0.001639 -> 0.982834 
 87 V M 0.174156 0.629055 0.196789 -> 0.629055 
 88 L M 0.108927 0.475150 0.415923 -> 0.475150 
 89 R M 0.121089 0.653895 0.225016 -> 0.653895 
 90 G E 0.045301 0.241951 0.712748 -> 0.712748 
 91 A B 0.841513 0.153642 0.004845 -> 0.841513 
 92 K E 0.002207 0.158603 0.839190 -> 0.839190 
 93 I B 0.522718 0.447064 0.030217 -> 0.522718 
 94 V M 0.435265 0.530238 0.034497 -> 0.530238 
 95 F M 0.363740 0.526908 0.109352 -> 0.526908 
 96 V B 0.857338 0.120771 0.021891 -> 0.857338 
 97 D M 0.205549 0.623951 0.170500 -> 0.623951 
 98 V B 0.790175 0.194381 0.015444 -> 0.790175 
 99 R M 0.046202 0.606141 0.347657 -> 0.606141 
 100 P E 0.059180 0.365699 0.575120 -> 0.575120 
 101 D E 0.007247 0.143327 0.849426 -> 0.849426 
 102 T M 0.310749 0.379951 0.309300 -> 0.379951 
 103 M B 0.441563 0.408312 0.150125 -> 0.441563 
 104 N E 0.169144 0.397716 0.433141 -> 0.433141 
 105 I B 0.620139 0.367237 0.012624 -> 0.620139 
 106 D M 0.044911 0.478961 0.476128 -> 0.478961 
 107 E M 0.066485 0.636451 0.297064 -> 0.636451 
 108 T E 0.010324 0.076182 0.913494 -> 0.913494 
 109 L M 0.097088 0.635234 0.267678 -> 0.635234 
 110 I B 0.925239 0.068559 0.006202 -> 0.925239 
 111 E E 0.008297 0.334393 0.657311 -> 0.657311 
 112 A E 0.027777 0.092588 0.879635 -> 0.879635 
 113 A M 0.249417 0.629593 0.120990 -> 0.629593 
 114 I B 0.729893 0.253458 0.016649 -> 0.729893 
 115 T E 0.027514 0.378388 0.594099 -> 0.594099 
 116 D E 0.004685 0.051485 0.943830 -> 0.943830 
 117 K E 0.020344 0.452773 0.526884 -> 0.526884 
 118 T B 0.857434 0.136578 0.005989 -> 0.857434 
 119 R M 0.123570 0.782498 0.093932 -> 0.782498 
 120 V B 0.981507 0.018232 0.000261 -> 0.981507 
 121 I B 0.983116 0.015656 0.001229 -> 0.983116 
 122 V B 0.988131 0.011276 0.000593 -> 0.988131 
 123 P B 0.977791 0.021271 0.000938 -> 0.977791 
 124 V B 0.880215 0.111131 0.008654 -> 0.880215 
 125 H B 0.755425 0.224610 0.019965 -> 0.755425 
 126 Y B 0.624529 0.323857 0.051614 -> 0.624529 
 127 A B 0.707733 0.236399 0.055868 -> 0.707733 
 128 G B 0.671347 0.263285 0.065369 -> 0.671347 
 129 V B 0.508084 0.407874 0.084042 -> 0.508084 
 130 A B 0.629455 0.306239 0.064306 -> 0.629455 
 131 C B 0.695892 0.284089 0.020018 -> 0.695892 
 132 E M 0.061627 0.536902 0.401471 -> 0.536902 
 133 M B 0.586328 0.400563 0.013109 -> 0.586328 
 134 D E 0.005839 0.130943 0.863218 -> 0.863218 
 135 T M 0.158556 0.727883 0.113561 -> 0.727883 
 136 I B 0.994473 0.004325 0.001202 -> 0.994473 
 137 M M 0.317245 0.663245 0.019510 -> 0.663245 
 138 A E 0.010739 0.179115 0.810146 -> 0.810146 
 139 L B 0.545165 0.448193 0.006642 -> 0.545165 
 140 A B 0.988272 0.010033 0.001695 -> 0.988272 
 141 K E 0.001849 0.052780 0.945371 -> 0.945371 
 142 K E 0.000902 0.023068 0.976030 -> 0.976030 
 143 H M 0.128738 0.825906 0.045357 -> 0.825906 
 144 N E 0.010489 0.179615 0.809896 -> 0.809896 
 145 L B 0.969899 0.028768 0.001334 -> 0.969899 
 146 F B 0.563240 0.432828 0.003932 -> 0.563240 
 147 V B 0.967241 0.032166 0.000593 -> 0.967241 
 148 V B 0.981941 0.017237 0.000822 -> 0.981941 
 149 E B 0.928935 0.068532 0.002533 -> 0.928935 
 150 D B 0.826869 0.165140 0.007991 -> 0.826869 
 151 A B 0.898311 0.093745 0.007944 -> 0.898311 
 152 A B 0.977761 0.019171 0.003069 -> 0.977761 
 153 Q B 0.686865 0.284927 0.028208 -> 0.686865 
 154 G B 0.903925 0.089528 0.006547 -> 0.903925 
 155 V B 0.805839 0.176969 0.017193 -> 0.805839 
 156 M B 0.546856 0.383027 0.070117 -> 0.546856 
 157 S B 0.911199 0.080082 0.008719 -> 0.911199 
 158 T M 0.155336 0.544392 0.300272 -> 0.544392 
 159 Y M 0.390578 0.511203 0.098219 -> 0.511203 
 160 K E 0.007476 0.163705 0.828819 -> 0.828819 
 161 G E 0.062372 0.188429 0.749199 -> 0.749199 
 162 R E 0.038459 0.454419 0.507122 -> 0.507122 
 163 A E 0.117023 0.364835 0.518141 -> 0.518141 
 164 L M 0.292608 0.412195 0.295197 -> 0.412195 
 165 G B 0.541346 0.324942 0.133712 -> 0.541346 
 166 T M 0.179559 0.445301 0.375141 -> 0.445301 
 167 I B 0.563968 0.334657 0.101374 -> 0.563968 
 168 G B 0.798298 0.179597 0.022105 -> 0.798298 
 169 H M 0.454040 0.479887 0.066073 -> 0.479887 
 170 I B 0.945696 0.049189 0.005115 -> 0.945696 
 171 G B 0.926728 0.068110 0.005162 -> 0.926728 
 172 C B 0.958448 0.037552 0.004000 -> 0.958448 
 173 F B 0.823260 0.155932 0.020808 -> 0.823260 
 174 S B 0.817956 0.170087 0.011957 -> 0.817956 
 175 F B 0.673829 0.298326 0.027844 -> 0.673829 
 176 H M 0.328194 0.548741 0.123065 -> 0.548741 
 177 E M 0.275286 0.474302 0.250412 -> 0.474302 
 178 T M 0.234101 0.420258 0.345641 -> 0.420258 
 179 K B 0.429687 0.407559 0.162754 -> 0.429687 
 180 N B 0.492550 0.343101 0.164348 -> 0.492550 
 181 Y B 0.682089 0.282723 0.035188 -> 0.682089 
 182 T M 0.336438 0.425084 0.238478 -> 0.425084 
 183 A B 0.742881 0.176239 0.080881 -> 0.742881 
 184 G B 0.383201 0.307111 0.309689 -> 0.383201 
 185 G B 0.434232 0.360826 0.204942 -> 0.434232 
 186 E M 0.366203 0.486262 0.147535 -> 0.486262 
 187 G B 0.934077 0.061871 0.004051 -> 0.934077 
 188 G B 0.966078 0.032930 0.000993 -> 0.966078 
 189 A B 0.986250 0.012915 0.000835 -> 0.986250 
 190 T B 0.979411 0.016560 0.004029 -> 0.979411 
 191 L B 0.955966 0.039462 0.004572 -> 0.955966 
 192 I B 0.920193 0.077763 0.002044 -> 0.920193 
 193 N M 0.156336 0.581672 0.261992 -> 0.581672 
 194 D M 0.116145 0.711618 0.172237 -> 0.711618 
 195 K E 0.001341 0.053770 0.944889 -> 0.944889 
 196 A E 0.045097 0.428757 0.526146 -> 0.526146 
 197 L B 0.752192 0.230829 0.016979 -> 0.752192 
 198 I M 0.393518 0.568025 0.038457 -> 0.568025 
 199 E E 0.006730 0.170483 0.822788 -> 0.822788 
 200 R M 0.222177 0.711045 0.066777 -> 0.711045 
 201 A B 0.980966 0.013281 0.005753 -> 0.980966 
 202 E E 0.028828 0.474036 0.497136 -> 0.497136 
 203 I M 0.101755 0.697746 0.200498 -> 0.697746 
 204 I B 0.858451 0.128877 0.012672 -> 0.858451 
 205 R M 0.109983 0.631632 0.258385 -> 0.631632 
 206 E E 0.005193 0.065854 0.928953 -> 0.928953 
 207 K E 0.029154 0.401847 0.568999 -> 0.568999 
 208 G E 0.352732 0.178892 0.468376 -> 0.468376 
 209 T M 0.194805 0.507857 0.297339 -> 0.507857 
 210 N E 0.042552 0.255311 0.702136 -> 0.702136 
 211 W M 0.128734 0.581748 0.289518 -> 0.581748 
 212 R E 0.032147 0.356911 0.610942 -> 0.610942 
 213 D E 0.125506 0.428966 0.445528 -> 0.445528 
 214 I M 0.244504 0.531938 0.223558 -> 0.531938 
 215 G E 0.233767 0.338681 0.427552 -> 0.427552 
 216 S M 0.333430 0.414901 0.251669 -> 0.414901 
 217 S E 0.133655 0.327419 0.538926 -> 0.538926 
 218 Y M 0.343121 0.456202 0.200676 -> 0.456202 
 219 L M 0.283422 0.492863 0.223715 -> 0.492863 
 220 M B 0.655058 0.279411 0.065531 -> 0.655058 
 221 S B 0.497855 0.357008 0.145137 -> 0.497855 
 222 D B 0.544064 0.362162 0.093774 -> 0.544064 
 223 L B 0.941518 0.052037 0.006445 -> 0.941518 
 224 Q B 0.754437 0.226157 0.019406 -> 0.754437 
 225 A B 0.952580 0.042452 0.004968 -> 0.952580 
 226 A B 0.968911 0.029351 0.001737 -> 0.968911 
 227 Y B 0.878943 0.116665 0.004393 -> 0.878943 
 228 L B 0.951740 0.043305 0.004955 -> 0.951740 
 229 W B 0.602934 0.378782 0.018285 -> 0.602934 
 230 A B 0.895152 0.094500 0.010349 -> 0.895152 
 231 Q B 0.785034 0.194165 0.020801 -> 0.785034 
 232 L B 0.576896 0.387321 0.035784 -> 0.576896 
 233 E E 0.029575 0.449858 0.520567 -> 0.520567 
 234 A B 0.565486 0.384105 0.050409 -> 0.565486 
 235 A B 0.733811 0.233183 0.033006 -> 0.733811 
 236 D E 0.024425 0.256320 0.719255 -> 0.719255 
 237 R E 0.012743 0.272979 0.714278 -> 0.714278 
 238 I B 0.779831 0.196750 0.023419 -> 0.779831 
 239 N M 0.329348 0.579973 0.090679 -> 0.579973 
 240 Q E 0.004791 0.119703 0.875506 -> 0.875506 
 241 Q M 0.112747 0.498522 0.388731 -> 0.498522 
 242 R M 0.432689 0.488633 0.078678 -> 0.488633 
 243 L M 0.180945 0.589420 0.229635 -> 0.589420 
 244 A E 0.117701 0.396465 0.485834 -> 0.485834 
 245 L B 0.568123 0.370057 0.061820 -> 0.568123 
 246 W B 0.687643 0.279598 0.032759 -> 0.687643 
 247 Q M 0.080870 0.465882 0.453248 -> 0.465882 
 248 N M 0.110306 0.537827 0.351866 -> 0.537827 
 249 Y B 0.699726 0.288535 0.011738 -> 0.699726 
 250 Y M 0.213663 0.729192 0.057145 -> 0.729192 
 251 D E 0.007266 0.104985 0.887748 -> 0.887748 
 252 A M 0.222649 0.635439 0.141911 -> 0.635439 
 253 L B 0.879530 0.115144 0.005326 -> 0.879530 
 254 A E 0.089698 0.451181 0.459121 -> 0.459121 
 255 P E 0.019238 0.072989 0.907774 -> 0.907774 
 256 L M 0.363956 0.561134 0.074910 -> 0.561134 
 257 A E 0.194404 0.293235 0.512360 -> 0.512360 
 258 K E 0.008912 0.096164 0.894924 -> 0.894924 
 259 A E 0.173170 0.350680 0.476151 -> 0.476151 
 260 G E 0.034592 0.233007 0.732401 -> 0.732401 
 261 R E 0.055655 0.393812 0.550532 -> 0.550532 
 262 I M 0.430017 0.496128 0.073855 -> 0.496128 
 263 E E 0.020165 0.270256 0.709578 -> 0.709578 
 264 L M 0.438926 0.486860 0.074214 -> 0.486860 
 265 P M 0.195557 0.422212 0.382231 -> 0.422212 
 266 S E 0.034750 0.203187 0.762063 -> 0.762063 
 267 I M 0.162022 0.559704 0.278274 -> 0.559704 
 268 P E 0.075024 0.429230 0.495745 -> 0.495745 
 269 D E 0.015296 0.115020 0.869683 -> 0.869683 
 270 G E 0.063547 0.221094 0.715358 -> 0.715358 
 271 C M 0.442586 0.459336 0.098078 -> 0.459336 
 272 V E 0.126788 0.422537 0.450675 -> 0.450675 
 273 Q M 0.250359 0.491308 0.258333 -> 0.491308 
 274 N M 0.255575 0.486172 0.258253 -> 0.486172 
 275 A B 0.789192 0.193064 0.017745 -> 0.789192 
 276 H B 0.711917 0.263570 0.024512 -> 0.711917 
 277 M B 0.861872 0.131538 0.006590 -> 0.861872 
 278 F B 0.838157 0.156545 0.005298 -> 0.838157 
 279 Y B 0.613250 0.374182 0.012568 -> 0.613250 
 280 I B 0.942462 0.056491 0.001047 -> 0.942462 
 281 K M 0.231366 0.680634 0.088000 -> 0.680634 
 282 L B 0.921311 0.076038 0.002651 -> 0.921311 
 283 R E 0.029272 0.472360 0.498367 -> 0.498367 
 284 D E 0.028188 0.342399 0.629413 -> 0.629413 
 285 I E 0.078433 0.432625 0.488942 -> 0.488942 
 286 D E 0.018246 0.166177 0.815576 -> 0.815576 
 287 D E 0.016409 0.378146 0.605446 -> 0.605446 
 288 R M 0.187681 0.644979 0.167339 -> 0.644979 
 289 S E 0.013231 0.180082 0.806687 -> 0.806687 
 290 A M 0.059297 0.540696 0.400008 -> 0.540696 
 291 L B 0.972744 0.023387 0.003869 -> 0.972744 
 292 I B 0.559127 0.420367 0.020506 -> 0.559127 
 293 N E 0.008256 0.262745 0.728999 -> 0.728999 
 294 F M 0.224878 0.753347 0.021774 -> 0.753347 
 295 L B 0.985952 0.012825 0.001223 -> 0.985952 
 296 K E 0.002809 0.204341 0.792850 -> 0.792850 
 297 E E 0.001183 0.043296 0.955520 -> 0.955520 
 298 A M 0.096779 0.731646 0.171575 -> 0.731646 
 299 E E 0.009547 0.139485 0.850968 -> 0.850968 
 300 I B 0.961475 0.033236 0.005289 -> 0.961475 
 301 M M 0.333647 0.633176 0.033178 -> 0.633176 
 302 A B 0.807775 0.181601 0.010624 -> 0.807775 
 303 V B 0.493556 0.461400 0.045044 -> 0.493556 
 304 F M 0.427918 0.490649 0.081433 -> 0.490649 
 305 H B 0.666055 0.303278 0.030667 -> 0.666055 
 306 Y M 0.310153 0.573462 0.116386 -> 0.573462 
 307 I B 0.510596 0.383753 0.105651 -> 0.510596 
 308 P B 0.778679 0.164930 0.056391 -> 0.778679 
 309 L B 0.669387 0.247085 0.083527 -> 0.669387 
 310 H M 0.306735 0.537434 0.155830 -> 0.537434 
 311 G E 0.089138 0.291941 0.618922 -> 0.618922 
 312 C M 0.351269 0.561821 0.086910 -> 0.561821 
 313 P E 0.031324 0.227064 0.741612 -> 0.741612 
 314 A B 0.453163 0.372863 0.173975 -> 0.453163 
 315 G B 0.629873 0.298032 0.072094 -> 0.629873 
 316 E E 0.015155 0.238349 0.746495 -> 0.746495 
 317 H E 0.031692 0.292493 0.675815 -> 0.675815 
 318 F M 0.363605 0.557223 0.079172 -> 0.557223 
 319 G E 0.270427 0.311839 0.417735 -> 0.417735 
 320 E E 0.049232 0.392783 0.557985 -> 0.557985 
 321 F M 0.283617 0.486063 0.230320 -> 0.486063 
 322 H E 0.032172 0.255438 0.712390 -> 0.712390 
 323 G E 0.086462 0.251707 0.661831 -> 0.661831 
 324 E E 0.033307 0.307234 0.659459 -> 0.659459 
 325 D M 0.301843 0.465590 0.232567 -> 0.465590 
 326 R E 0.049352 0.346496 0.604152 -> 0.604152 
 327 Y M 0.339778 0.489775 0.170448 -> 0.489775 
 328 T B 0.798056 0.163408 0.038536 -> 0.798056 
 329 T M 0.174138 0.590652 0.235210 -> 0.590652 
 330 K E 0.026139 0.399916 0.573945 -> 0.573945 
 331 E B 0.689776 0.251918 0.058306 -> 0.689776 
 332 S B 0.860947 0.131844 0.007209 -> 0.860947 
 333 E E 0.046137 0.454162 0.499701 -> 0.499701 
 334 R M 0.185597 0.612430 0.201973 -> 0.612430 
 335 L B 0.831319 0.158126 0.010555 -> 0.831319 
 336 L B 0.968427 0.026897 0.004676 -> 0.968427 
 337 R B 0.531823 0.426249 0.041928 -> 0.531823 
 338 L B 0.951774 0.041083 0.007142 -> 0.951774 
 339 P B 0.874565 0.117364 0.008070 -> 0.874565 
 340 L B 0.786280 0.201265 0.012454 -> 0.786280 
 341 F B 0.596035 0.369603 0.034363 -> 0.596035 
 342 Y M 0.091679 0.538261 0.370060 -> 0.538261 
 343 N E 0.024139 0.239838 0.736024 -> 0.736024 
 344 L B 0.531562 0.442868 0.025570 -> 0.531562 
 345 S M 0.072381 0.568652 0.358967 -> 0.568652 
 346 P E 0.009365 0.249347 0.741288 -> 0.741288 
 347 V E 0.017116 0.243889 0.738995 -> 0.738995 
 348 N M 0.290050 0.630970 0.078981 -> 0.630970 
 349 Q B 0.548737 0.424498 0.026765 -> 0.548737 
 350 R E 0.011517 0.322198 0.666284 -> 0.666284 
 351 T M 0.086815 0.690801 0.222384 -> 0.690801 
 352 V B 0.982481 0.015666 0.001852 -> 0.982481 
 353 I B 0.884715 0.112309 0.002976 -> 0.884715 
 354 A E 0.023276 0.205438 0.771286 -> 0.771286 
 355 T M 0.287886 0.690445 0.021668 -> 0.690445 
 356 L B 0.910089 0.087073 0.002838 -> 0.910089 
 357 L M 0.035266 0.618857 0.345877 -> 0.618857 
 358 N E 0.000980 0.066129 0.932892 -> 0.932892 
 359 Y M 0.323543 0.582400 0.094057 -> 0.582400 
 360 F M 0.058345 0.518744 0.422911 -> 0.518744 
