# Supplementary material for: AcconPred: Predicting Solvent Accessibility and Contact Number Simultaneously by a Multitask Learning Framework under the Conditional Neural Fields Model
Source: Biomed Res Int. 2015 Aug 3;2015:678764. doi: 10.1155/2015/678764 (PMC4538422; doi:10.1155/2015/678764)
Supplement: Supplementary file 1 — Training/testing dataset as well as the CASP11 evaluation dataset could be found in the Supplementary Material. The CASP11 evaluation dataset contains all detailed results from SPINE-X, SANN, ACCpro5 and AcconPred. [file 678764.f1.zip › Supplmentary_Files/105_casp11_domain/casp11_domain_AcconPred/T0803-D1.reso]

# AcconPred: three-state solvent accessibility prediction results 
# probabilities are in the order of B (Bury, pACC: 0-10), M (Medium, pACC: 11-40) and E (Exposed, pACC: 41-100), 
# where pACC is the relative solvent accessibility value calculated by DSSP 
# output format: <position> <one letter amino acid> <predicted label> ... <probabilities> ... -> <maximal probability> 

 1 S E 0.011680 0.064541 0.923779 -> 0.923779 
 2 N E 0.008341 0.128751 0.862909 -> 0.862909 
 3 I E 0.106106 0.431174 0.462720 -> 0.462720 
 4 N E 0.014492 0.175554 0.809954 -> 0.809954 
 5 K E 0.002299 0.066139 0.931562 -> 0.931562 
 6 A E 0.152337 0.248598 0.599065 -> 0.599065 
 7 K E 0.049576 0.403469 0.546956 -> 0.546956 
 8 V M 0.149178 0.610650 0.240171 -> 0.610650 
 9 A E 0.036917 0.203813 0.759270 -> 0.759270 
 10 S M 0.179050 0.544327 0.276623 -> 0.544327 
 11 V B 0.859261 0.110203 0.030536 -> 0.859261 
 12 E E 0.021049 0.416201 0.562749 -> 0.562749 
 13 S E 0.076229 0.316073 0.607698 -> 0.607698 
 14 D B 0.536375 0.416555 0.047071 -> 0.536375 
 15 Y B 0.505773 0.459954 0.034272 -> 0.505773 
 16 S E 0.010500 0.205407 0.784093 -> 0.784093 
 17 S M 0.164270 0.644356 0.191374 -> 0.644356 
 18 I B 0.909616 0.081452 0.008931 -> 0.909616 
 19 K M 0.033672 0.553480 0.412847 -> 0.553480 
 20 S E 0.021457 0.247536 0.731008 -> 0.731008 
 21 A B 0.765936 0.215964 0.018100 -> 0.765936 
 22 A B 0.891773 0.096596 0.011631 -> 0.891773 
 23 L E 0.052120 0.446664 0.501216 -> 0.501216 
 24 S M 0.228762 0.475883 0.295354 -> 0.475883 
 25 Y B 0.636086 0.335507 0.028407 -> 0.636086 
 26 Y M 0.241150 0.678530 0.080319 -> 0.678530 
 27 S E 0.339875 0.305886 0.354239 -> 0.354239 
 28 D M 0.142348 0.456839 0.400813 -> 0.456839 
 29 T M 0.148021 0.453243 0.398736 -> 0.453243 
 30 N E 0.078977 0.276750 0.644273 -> 0.644273 
 31 K E 0.017826 0.222939 0.759235 -> 0.759235 
 32 I B 0.684403 0.290638 0.024960 -> 0.684403 
 33 P B 0.424890 0.377623 0.197486 -> 0.424890 
 34 V E 0.142903 0.422221 0.434875 -> 0.434875 
 35 T E 0.074974 0.442631 0.482395 -> 0.482395 
 36 P E 0.016453 0.115314 0.868232 -> 0.868232 
 37 D E 0.020374 0.163160 0.816466 -> 0.816466 
 38 G E 0.044226 0.212957 0.742817 -> 0.742817 
 39 Q E 0.074382 0.327230 0.598388 -> 0.598388 
 40 T E 0.034908 0.166250 0.798841 -> 0.798841 
 41 G E 0.191101 0.322211 0.486688 -> 0.486688 
 42 L E 0.171669 0.381971 0.446360 -> 0.446360 
 43 N E 0.135648 0.322218 0.542134 -> 0.542134 
 44 V M 0.285202 0.452453 0.262345 -> 0.452453 
 45 L E 0.096583 0.329431 0.573987 -> 0.573987 
 46 E E 0.040787 0.320787 0.638427 -> 0.638427 
 47 T E 0.124712 0.272177 0.603111 -> 0.603111 
 48 Y B 0.516271 0.443072 0.040657 -> 0.516271 
 49 M B 0.795394 0.181341 0.023265 -> 0.795394 
 50 E E 0.020029 0.242700 0.737271 -> 0.737271 
 51 S E 0.021334 0.175545 0.803121 -> 0.803121 
 52 L M 0.174476 0.545837 0.279687 -> 0.545837 
 53 P M 0.140821 0.479639 0.379540 -> 0.479639 
 54 D E 0.013235 0.166990 0.819775 -> 0.819775 
 55 K E 0.006002 0.085605 0.908393 -> 0.908393 
 56 A M 0.145462 0.511552 0.342987 -> 0.511552 
 57 D E 0.116789 0.320670 0.562541 -> 0.562541 
 58 I B 0.438149 0.380086 0.181765 -> 0.438149 
 59 G E 0.024823 0.152875 0.822303 -> 0.822303 
 60 G M 0.087990 0.474221 0.437789 -> 0.474221 
 61 E E 0.042242 0.308119 0.649639 -> 0.649639 
 62 Y M 0.438872 0.507740 0.053389 -> 0.507740 
 63 K M 0.074291 0.548929 0.376780 -> 0.548929 
 64 L B 0.616476 0.339616 0.043908 -> 0.616476 
 65 I M 0.249206 0.616304 0.134490 -> 0.616304 
 66 K M 0.090699 0.497189 0.412112 -> 0.497189 
 67 V E 0.197517 0.383592 0.418891 -> 0.418891 
 68 G E 0.157045 0.306187 0.536768 -> 0.536768 
 69 N E 0.023853 0.251533 0.724613 -> 0.724613 
 70 K E 0.016084 0.251450 0.732466 -> 0.732466 
 71 L M 0.442089 0.476869 0.081042 -> 0.476869 
 72 V M 0.284443 0.495577 0.219981 -> 0.495577 
 73 L B 0.796520 0.190136 0.013344 -> 0.796520 
 74 Q M 0.201296 0.589665 0.209039 -> 0.589665 
 75 I B 0.748307 0.229195 0.022498 -> 0.748307 
 76 G M 0.297886 0.460876 0.241238 -> 0.460876 
 77 K E 0.076632 0.359410 0.563958 -> 0.563958 
 78 D E 0.075764 0.350187 0.574049 -> 0.574049 
 79 G E 0.194885 0.401991 0.403125 -> 0.403125 
 80 E E 0.016430 0.120074 0.863495 -> 0.863495 
 81 G E 0.048310 0.178892 0.772798 -> 0.772798 
 82 V M 0.169335 0.515822 0.314843 -> 0.515822 
 83 T E 0.021326 0.223633 0.755040 -> 0.755040 
 84 L M 0.159501 0.610543 0.229956 -> 0.610543 
 85 T E 0.024567 0.222900 0.752534 -> 0.752534 
 86 E E 0.023711 0.200709 0.775579 -> 0.775579 
 87 A E 0.152506 0.263635 0.583859 -> 0.583859 
 88 Q E 0.070751 0.343737 0.585512 -> 0.585512 
 89 S B 0.382215 0.363203 0.254582 -> 0.382215 
 90 A B 0.414492 0.328060 0.257449 -> 0.414492 
 91 K E 0.019832 0.248844 0.731324 -> 0.731324 
 92 L M 0.351929 0.531361 0.116710 -> 0.531361 
 93 L B 0.750223 0.194539 0.055238 -> 0.750223 
 94 S E 0.048415 0.393571 0.558013 -> 0.558013 
 95 D E 0.039238 0.259331 0.701431 -> 0.701431 
 96 I M 0.217381 0.470367 0.312251 -> 0.470367 
 97 G E 0.149772 0.356336 0.493891 -> 0.493891 
 98 K E 0.007135 0.087557 0.905308 -> 0.905308 
 99 D E 0.071131 0.318895 0.609973 -> 0.609973 
 100 K E 0.019378 0.228378 0.752244 -> 0.752244 
 101 I M 0.290931 0.435160 0.273909 -> 0.435160 
 102 Y M 0.369105 0.527640 0.103255 -> 0.527640 
 103 T M 0.170165 0.447100 0.382735 -> 0.447100 
 104 G M 0.157277 0.443979 0.398744 -> 0.443979 
 105 V B 0.717406 0.251739 0.030855 -> 0.717406 
 106 T M 0.078046 0.496697 0.425258 -> 0.496697 
 107 G B 0.459160 0.325188 0.215653 -> 0.459160 
 108 D M 0.159992 0.508864 0.331143 -> 0.508864 
 109 N E 0.056036 0.282552 0.661412 -> 0.661412 
 110 F M 0.314512 0.424833 0.260655 -> 0.424833 
 111 G E 0.117710 0.259935 0.622355 -> 0.622355 
 112 E E 0.030683 0.224916 0.744402 -> 0.744402 
 113 Q E 0.067970 0.413294 0.518737 -> 0.518737 
 114 L M 0.436524 0.498492 0.064984 -> 0.498492 
 115 K E 0.005852 0.160152 0.833997 -> 0.833997 
 116 D E 0.020118 0.182934 0.796948 -> 0.796948 
 117 T E 0.087803 0.343923 0.568274 -> 0.568274 
 118 T E 0.098309 0.351291 0.550400 -> 0.550400 
 119 K E 0.010460 0.120572 0.868968 -> 0.868968 
 120 I M 0.323360 0.522896 0.153745 -> 0.522896 
 121 D E 0.043616 0.351943 0.604441 -> 0.604441 
 122 N M 0.181917 0.557458 0.260625 -> 0.557458 
 123 K M 0.073165 0.561678 0.365157 -> 0.561678 
 124 A B 0.878305 0.110636 0.011059 -> 0.878305 
 125 L B 0.958861 0.037372 0.003767 -> 0.958861 
 126 Y B 0.768552 0.221610 0.009838 -> 0.768552 
 127 I B 0.966450 0.031278 0.002271 -> 0.966450 
 128 V B 0.891083 0.101626 0.007291 -> 0.891083 
 129 L B 0.853657 0.136991 0.009352 -> 0.853657 
 130 I B 0.842757 0.132581 0.024662 -> 0.842757 
 131 D M 0.273535 0.531828 0.194636 -> 0.531828 
 132 N E 0.121142 0.422015 0.456843 -> 0.456843 
 133 T E 0.036192 0.224191 0.739617 -> 0.739617 
 134 V E 0.019925 0.165684 0.814391 -> 0.814391 
