# Supplementary material for: AcconPred: Predicting Solvent Accessibility and Contact Number Simultaneously by a Multitask Learning Framework under the Conditional Neural Fields Model
Source: Biomed Res Int. 2015 Aug 3;2015:678764. doi: 10.1155/2015/678764 (PMC4538422; doi:10.1155/2015/678764)
Supplement: Supplementary file 1 — Training/testing dataset as well as the CASP11 evaluation dataset could be found in the Supplementary Material. The CASP11 evaluation dataset contains all detailed results from SPINE-X, SANN, ACCpro5 and AcconPred. [file 678764.f1.zip › Supplmentary_Files/105_casp11_domain/casp11_domain_AcconPred/T0805-D1.reso]

# AcconPred: three-state solvent accessibility prediction results 
# probabilities are in the order of B (Bury, pACC: 0-10), M (Medium, pACC: 11-40) and E (Exposed, pACC: 41-100), 
# where pACC is the relative solvent accessibility value calculated by DSSP 
# output format: <position> <one letter amino acid> <predicted label> ... <probabilities> ... -> <maximal probability> 

 1 T E 0.002795 0.020016 0.977189 -> 0.977189 
 2 L M 0.079250 0.506440 0.414310 -> 0.506440 
 3 N E 0.012002 0.136722 0.851276 -> 0.851276 
 4 L M 0.259437 0.509380 0.231183 -> 0.509380 
 5 S E 0.013492 0.368358 0.618149 -> 0.618149 
 6 V B 0.864927 0.125167 0.009906 -> 0.864927 
 7 D M 0.047115 0.728876 0.224008 -> 0.728876 
 8 E E 0.009521 0.317452 0.673027 -> 0.673027 
 9 V B 0.857471 0.137258 0.005271 -> 0.857471 
 10 L B 0.882247 0.108069 0.009684 -> 0.882247 
 11 T E 0.023732 0.348629 0.627638 -> 0.627638 
 12 T E 0.014646 0.293922 0.691431 -> 0.691431 
 13 T B 0.672978 0.315864 0.011158 -> 0.672978 
 14 R M 0.399669 0.507152 0.093179 -> 0.507152 
 15 S B 0.862096 0.098352 0.039552 -> 0.862096 
 16 V B 0.680885 0.277748 0.041368 -> 0.680885 
 17 R B 0.482175 0.407987 0.109839 -> 0.482175 
 18 K E 0.013607 0.255419 0.730974 -> 0.730974 
 19 R M 0.268746 0.548409 0.182845 -> 0.548409 
 20 L M 0.097799 0.456327 0.445874 -> 0.456327 
 21 D E 0.018951 0.373657 0.607392 -> 0.607392 
 22 F E 0.022188 0.285396 0.692416 -> 0.692416 
 23 D E 0.002438 0.044266 0.953296 -> 0.953296 
 24 K E 0.005064 0.239658 0.755278 -> 0.755278 
 25 P E 0.003751 0.100054 0.896195 -> 0.896195 
 26 V M 0.467511 0.521157 0.011331 -> 0.521157 
 27 P E 0.005663 0.194105 0.800232 -> 0.800232 
 28 R E 0.001786 0.134871 0.863343 -> 0.863343 
 29 D E 0.006218 0.045940 0.947843 -> 0.947843 
 30 V M 0.176831 0.762361 0.060808 -> 0.762361 
 31 L B 0.919135 0.075217 0.005648 -> 0.919135 
 32 M M 0.047110 0.599201 0.353689 -> 0.599201 
 33 E M 0.056747 0.588364 0.354889 -> 0.588364 
 34 C B 0.982748 0.016062 0.001189 -> 0.982748 
 35 L B 0.864060 0.131180 0.004760 -> 0.864060 
 36 E M 0.042349 0.618779 0.338872 -> 0.618779 
 37 L B 0.810951 0.178769 0.010281 -> 0.810951 
 38 A B 0.980129 0.017902 0.001970 -> 0.980129 
 39 L M 0.266036 0.555847 0.178117 -> 0.555847 
 40 Q M 0.289662 0.586121 0.124217 -> 0.586121 
 41 A B 0.952191 0.041205 0.006604 -> 0.952191 
 42 P B 0.677323 0.258524 0.064153 -> 0.677323 
 43 T B 0.731140 0.204917 0.063943 -> 0.731140 
 44 G B 0.837786 0.117324 0.044890 -> 0.837786 
 45 S B 0.525227 0.352103 0.122669 -> 0.525227 
 46 N B 0.682933 0.264854 0.052213 -> 0.682933 
 47 S B 0.764356 0.195384 0.040261 -> 0.764356 
 48 Q B 0.600367 0.305136 0.094497 -> 0.600367 
 49 G B 0.687281 0.257279 0.055441 -> 0.687281 
 50 W B 0.802205 0.183359 0.014436 -> 0.802205 
 51 Q M 0.357599 0.577532 0.064868 -> 0.577532 
 52 W B 0.827545 0.167971 0.004484 -> 0.827545 
 53 V B 0.935803 0.060323 0.003874 -> 0.935803 
 54 F B 0.804529 0.186730 0.008741 -> 0.804529 
 55 V B 0.974326 0.024174 0.001500 -> 0.974326 
 56 E M 0.050789 0.543875 0.405335 -> 0.543875 
 57 D M 0.036222 0.597842 0.365936 -> 0.597842 
 58 A E 0.005383 0.100953 0.893664 -> 0.893664 
 59 A E 0.010974 0.046388 0.942638 -> 0.942638 
 60 K M 0.064031 0.695512 0.240457 -> 0.695512 
 61 K M 0.110645 0.640579 0.248776 -> 0.640579 
 62 K E 0.004231 0.081389 0.914380 -> 0.914380 
 63 A M 0.098970 0.572766 0.328264 -> 0.572766 
 64 I B 0.975956 0.013501 0.010543 -> 0.975956 
 65 A B 0.561750 0.413487 0.024763 -> 0.561750 
 66 D E 0.007941 0.183702 0.808357 -> 0.808357 
 67 V M 0.352614 0.614051 0.033336 -> 0.614051 
 68 Y B 0.769412 0.216475 0.014113 -> 0.769412 
 69 L M 0.221725 0.552271 0.226004 -> 0.552271 
 70 A E 0.119758 0.270195 0.610047 -> 0.610047 
 71 N B 0.511439 0.395598 0.092963 -> 0.511439 
 72 A B 0.792539 0.157816 0.049645 -> 0.792539 
 73 R E 0.025729 0.337139 0.637132 -> 0.637132 
 74 G E 0.096140 0.229551 0.674308 -> 0.674308 
 75 Y M 0.242495 0.519631 0.237874 -> 0.519631 
 76 L B 0.606186 0.280773 0.113041 -> 0.606186 
 77 M E 0.130489 0.423968 0.445543 -> 0.445543 
 78 G E 0.083264 0.198081 0.718655 -> 0.718655 
 79 R M 0.119652 0.520643 0.359704 -> 0.520643 
 80 V B 0.577483 0.289919 0.132598 -> 0.577483 
 81 R E 0.035375 0.320756 0.643869 -> 0.643869 
 82 D E 0.049739 0.238134 0.712127 -> 0.712127 
 83 S B 0.554180 0.334180 0.111640 -> 0.554180 
 84 A B 0.616586 0.286125 0.097289 -> 0.616586 
 85 T E 0.058578 0.294088 0.647334 -> 0.647334 
 86 Y M 0.174864 0.624135 0.201001 -> 0.624135 
 87 L B 0.774773 0.205462 0.019765 -> 0.774773 
 88 A M 0.397563 0.460298 0.142139 -> 0.460298 
 89 E E 0.014014 0.200570 0.785416 -> 0.785416 
 90 H M 0.427028 0.527234 0.045738 -> 0.527234 
 91 M B 0.877896 0.112248 0.009855 -> 0.877896 
 92 H E 0.041308 0.387129 0.571563 -> 0.571563 
 93 R E 0.017393 0.223392 0.759215 -> 0.759215 
 94 A B 0.877479 0.112902 0.009619 -> 0.877479 
 95 P M 0.236205 0.500937 0.262859 -> 0.500937 
 96 V B 0.775428 0.205343 0.019229 -> 0.775428 
 97 L B 0.927397 0.066092 0.006511 -> 0.927397 
 98 L B 0.896325 0.097265 0.006410 -> 0.896325 
 99 I B 0.912272 0.080119 0.007609 -> 0.912272 
 100 P B 0.770995 0.195344 0.033661 -> 0.770995 
 101 C B 0.791994 0.199146 0.008859 -> 0.791994 
 102 L B 0.567723 0.354556 0.077721 -> 0.567723 
 103 K E 0.070854 0.447690 0.481456 -> 0.481456 
 104 G M 0.220895 0.462662 0.316443 -> 0.462662 
 105 R E 0.057061 0.363761 0.579179 -> 0.579179 
 106 E E 0.046142 0.291689 0.662169 -> 0.662169 
 107 D E 0.053164 0.279105 0.667731 -> 0.667731 
 108 E E 0.052210 0.269368 0.678423 -> 0.678423 
 109 S E 0.147428 0.347105 0.505467 -> 0.505467 
 110 A E 0.091586 0.246112 0.662302 -> 0.662302 
 111 V E 0.131703 0.358327 0.509970 -> 0.509970 
 112 G E 0.125062 0.255152 0.619786 -> 0.619786 
 113 G M 0.331721 0.455579 0.212700 -> 0.455579 
 114 V B 0.588880 0.311652 0.099468 -> 0.588880 
 115 S B 0.498079 0.360595 0.141326 -> 0.498079 
 116 F B 0.753687 0.224497 0.021816 -> 0.753687 
 117 W B 0.859746 0.128089 0.012166 -> 0.859746 
 118 A B 0.766858 0.188888 0.044254 -> 0.766858 
 119 S B 0.927017 0.068843 0.004140 -> 0.927017 
 120 L B 0.993829 0.005504 0.000667 -> 0.993829 
 121 F B 0.951700 0.046001 0.002299 -> 0.951700 
 122 P B 0.954425 0.039834 0.005742 -> 0.954425 
 123 A B 0.992276 0.007227 0.000497 -> 0.992276 
 124 V B 0.995667 0.004097 0.000236 -> 0.995667 
 125 W B 0.958269 0.040003 0.001728 -> 0.958269 
 126 S B 0.981147 0.017815 0.001038 -> 0.981147 
 127 F B 0.996044 0.003746 0.000209 -> 0.996044 
 128 C B 0.986299 0.013115 0.000587 -> 0.986299 
 129 L B 0.940470 0.054388 0.005142 -> 0.940470 
 130 A B 0.981774 0.015887 0.002339 -> 0.981774 
 131 L B 0.997700 0.002023 0.000278 -> 0.997700 
 132 R M 0.093057 0.756446 0.150497 -> 0.756446 
 133 S B 0.683582 0.244821 0.071598 -> 0.683582 
 134 R M 0.133185 0.719931 0.146883 -> 0.719931 
 135 G E 0.176849 0.334068 0.489083 -> 0.489083 
 136 L B 0.904754 0.084446 0.010800 -> 0.904754 
 137 G B 0.747511 0.224898 0.027591 -> 0.747511 
 138 S B 0.938616 0.056114 0.005269 -> 0.938616 
 139 C B 0.960075 0.037497 0.002428 -> 0.960075 
 140 W B 0.813251 0.178205 0.008544 -> 0.813251 
 141 T B 0.928987 0.067475 0.003539 -> 0.928987 
 142 T B 0.802663 0.177278 0.020059 -> 0.802663 
 143 L B 0.712008 0.259695 0.028297 -> 0.712008 
 144 H B 0.679676 0.267179 0.053144 -> 0.679676 
 145 L B 0.670424 0.251037 0.078539 -> 0.670424 
 146 L M 0.372506 0.454253 0.173241 -> 0.454253 
 147 D E 0.153759 0.365557 0.480683 -> 0.480683 
 148 N E 0.069264 0.241099 0.689638 -> 0.689638 
 149 G M 0.281561 0.568252 0.150188 -> 0.568252 
 150 E M 0.094754 0.547400 0.357846 -> 0.547400 
 151 H E 0.008210 0.115706 0.876084 -> 0.876084 
 152 K E 0.009502 0.356703 0.633795 -> 0.633795 
 153 V B 0.989635 0.007929 0.002436 -> 0.989635 
 154 A M 0.246302 0.671918 0.081781 -> 0.671918 
 155 D E 0.000970 0.037480 0.961551 -> 0.961551 
 156 V M 0.089655 0.775033 0.135312 -> 0.775033 
 157 L B 0.660765 0.331165 0.008070 -> 0.660765 
 158 G E 0.008308 0.115664 0.876028 -> 0.876028 
 159 I M 0.434178 0.526254 0.039568 -> 0.526254 
 160 P E 0.010631 0.271567 0.717802 -> 0.717802 
 161 Y E 0.010212 0.273801 0.715986 -> 0.715986 
 162 D E 0.006447 0.136730 0.856823 -> 0.856823 
 163 E E 0.009577 0.277754 0.712670 -> 0.712670 
 164 Y M 0.469540 0.500027 0.030433 -> 0.500027 
 165 S M 0.237910 0.610796 0.151295 -> 0.610796 
 166 Q B 0.852139 0.140760 0.007101 -> 0.852139 
 167 G B 0.947188 0.052217 0.000595 -> 0.947188 
 168 G B 0.988021 0.011439 0.000540 -> 0.988021 
 169 L B 0.986325 0.013269 0.000405 -> 0.986325 
 170 L B 0.987209 0.012092 0.000699 -> 0.987209 
 171 P B 0.929918 0.067164 0.002918 -> 0.929918 
 172 I B 0.982213 0.016971 0.000816 -> 0.982213 
 173 A B 0.933120 0.059005 0.007874 -> 0.933120 
 174 Y M 0.404109 0.565697 0.030194 -> 0.565697 
 175 T M 0.394795 0.515423 0.089783 -> 0.515423 
 176 Q E 0.009523 0.141015 0.849462 -> 0.849462 
 177 G E 0.020964 0.161403 0.817633 -> 0.817633 
 178 I E 0.034614 0.286612 0.678774 -> 0.678774 
 179 D E 0.017899 0.219101 0.763000 -> 0.763000 
 180 F M 0.131371 0.521516 0.347113 -> 0.521516 
 181 R E 0.026465 0.351573 0.621962 -> 0.621962 
 182 P E 0.041949 0.280676 0.677375 -> 0.677375 
 183 A E 0.132768 0.420694 0.446538 -> 0.446538 
 184 K E 0.007809 0.124508 0.867683 -> 0.867683 
 185 R M 0.437649 0.450843 0.111509 -> 0.450843 
 186 L M 0.247814 0.638906 0.113280 -> 0.638906 
 187 P E 0.022928 0.340482 0.636591 -> 0.636591 
 188 A M 0.205737 0.646631 0.147631 -> 0.646631 
 189 E E 0.003191 0.055833 0.940976 -> 0.940976 
 190 S E 0.134258 0.427936 0.437806 -> 0.437806 
 191 V M 0.428917 0.478501 0.092582 -> 0.478501 
 192 T M 0.259723 0.440376 0.299901 -> 0.440376 
 193 H M 0.091467 0.504582 0.403951 -> 0.504582 
 194 W M 0.085306 0.467373 0.447321 -> 0.467373 
 195 N E 0.066776 0.348106 0.585118 -> 0.585118 
 196 G E 0.060612 0.262198 0.677190 -> 0.677190 
 197 W M 0.057024 0.491487 0.451489 -> 0.491487 
