# Supplementary material for: AcconPred: Predicting Solvent Accessibility and Contact Number Simultaneously by a Multitask Learning Framework under the Conditional Neural Fields Model
Source: Biomed Res Int. 2015 Aug 3;2015:678764. doi: 10.1155/2015/678764 (PMC4538422; doi:10.1155/2015/678764)
Supplement: Supplementary file 1 — Training/testing dataset as well as the CASP11 evaluation dataset could be found in the Supplementary Material. The CASP11 evaluation dataset contains all detailed results from SPINE-X, SANN, ACCpro5 and AcconPred. [file 678764.f1.zip › Supplmentary_Files/105_casp11_domain/casp11_domain_AcconPred/T0806-D1.reso]

# AcconPred: three-state solvent accessibility prediction results 
# probabilities are in the order of B (Bury, pACC: 0-10), M (Medium, pACC: 11-40) and E (Exposed, pACC: 41-100), 
# where pACC is the relative solvent accessibility value calculated by DSSP 
# output format: <position> <one letter amino acid> <predicted label> ... <probabilities> ... -> <maximal probability> 

 1 M E 0.033902 0.163808 0.802290 -> 0.802290 
 2 L M 0.242041 0.651852 0.106107 -> 0.651852 
 3 I B 0.860382 0.131068 0.008550 -> 0.860382 
 4 L B 0.813112 0.173401 0.013487 -> 0.813112 
 5 I B 0.892595 0.100533 0.006873 -> 0.892595 
 6 S B 0.789557 0.186737 0.023706 -> 0.789557 
 7 P B 0.640909 0.290094 0.068997 -> 0.640909 
 8 A B 0.706833 0.220575 0.072593 -> 0.706833 
 9 K E 0.050321 0.402962 0.546717 -> 0.546717 
 10 T E 0.010832 0.125928 0.863240 -> 0.863240 
 11 L M 0.199707 0.676968 0.123325 -> 0.676968 
 12 D E 0.017679 0.253991 0.728330 -> 0.728330 
 13 Y M 0.105208 0.526314 0.368478 -> 0.526314 
 14 Q E 0.004035 0.045863 0.950101 -> 0.950101 
 15 S M 0.064340 0.496491 0.439169 -> 0.496491 
 16 P E 0.018388 0.114698 0.866914 -> 0.866914 
 17 L M 0.344051 0.499266 0.156683 -> 0.499266 
 18 T E 0.042784 0.261797 0.695419 -> 0.695419 
 19 T E 0.114836 0.377752 0.507412 -> 0.507412 
 20 T E 0.105302 0.350649 0.544049 -> 0.544049 
 21 R E 0.021940 0.230835 0.747225 -> 0.747225 
 22 Y M 0.432099 0.478657 0.089244 -> 0.478657 
 23 T M 0.394338 0.394746 0.210917 -> 0.394746 
 24 L M 0.294343 0.586778 0.118879 -> 0.586778 
 25 P B 0.347707 0.305409 0.346884 -> 0.347707 
 26 E E 0.030178 0.334290 0.635533 -> 0.635533 
 27 L B 0.929115 0.054042 0.016843 -> 0.929115 
 28 L M 0.157275 0.718249 0.124476 -> 0.718249 
 29 D E 0.004811 0.057536 0.937653 -> 0.937653 
 30 N M 0.133162 0.724726 0.142112 -> 0.724726 
 31 S B 0.886503 0.103856 0.009640 -> 0.886503 
 32 Q E 0.007719 0.318788 0.673493 -> 0.673493 
 33 Q E 0.003484 0.208029 0.788487 -> 0.788487 
 34 L B 0.954636 0.042562 0.002802 -> 0.954636 
 35 I B 0.689190 0.305000 0.005810 -> 0.689190 
 36 H E 0.003955 0.211040 0.785005 -> 0.785005 
 37 E M 0.067982 0.834748 0.097271 -> 0.834748 
 38 A B 0.968318 0.028470 0.003212 -> 0.968318 
 39 R E 0.012040 0.268009 0.719951 -> 0.719951 
 40 K E 0.001389 0.043532 0.955079 -> 0.955079 
 41 L M 0.244377 0.719953 0.035670 -> 0.719953 
 42 T E 0.027511 0.392782 0.579707 -> 0.579707 
 43 P E 0.035822 0.295967 0.668210 -> 0.668210 
 44 P E 0.001711 0.032589 0.965699 -> 0.965699 
 45 Q M 0.019697 0.530467 0.449836 -> 0.530467 
 46 I B 0.916397 0.073821 0.009782 -> 0.916397 
 47 S M 0.122648 0.641924 0.235428 -> 0.641924 
 48 T E 0.005141 0.165157 0.829703 -> 0.829703 
 49 L M 0.320302 0.635927 0.043770 -> 0.635927 
 50 M B 0.633135 0.342613 0.024252 -> 0.633135 
 51 R E 0.000787 0.060056 0.939157 -> 0.939157 
 52 I M 0.365812 0.606194 0.027994 -> 0.606194 
 53 S E 0.053967 0.425693 0.520340 -> 0.520340 
 54 D E 0.003139 0.082764 0.914097 -> 0.914097 
 55 K E 0.001757 0.046240 0.952003 -> 0.952003 
 56 L M 0.396052 0.541814 0.062134 -> 0.541814 
 57 A B 0.641466 0.285284 0.073250 -> 0.641466 
 58 G E 0.032920 0.236863 0.730217 -> 0.730217 
 59 I M 0.140425 0.571684 0.287891 -> 0.571684 
 60 N B 0.863582 0.112093 0.024325 -> 0.863582 
 61 A B 0.496543 0.445032 0.058425 -> 0.496543 
 62 A E 0.025831 0.148705 0.825464 -> 0.825464 
 63 R M 0.115029 0.744546 0.140424 -> 0.744546 
 64 F B 0.843898 0.147895 0.008207 -> 0.843898 
 65 H E 0.019271 0.386340 0.594388 -> 0.594388 
 66 D E 0.008781 0.162890 0.828329 -> 0.828329 
 67 W B 0.647029 0.341668 0.011303 -> 0.647029 
 68 Q M 0.048545 0.484173 0.467281 -> 0.484173 
 69 P E 0.036413 0.207245 0.756342 -> 0.756342 
 70 D E 0.011544 0.130545 0.857911 -> 0.857911 
 71 F B 0.597271 0.370546 0.032183 -> 0.597271 
 72 T E 0.070975 0.379316 0.549710 -> 0.549710 
 73 P E 0.025301 0.190240 0.784460 -> 0.784460 
 74 A E 0.037333 0.267384 0.695283 -> 0.695283 
 75 N E 0.049800 0.463256 0.486944 -> 0.486944 
 76 A B 0.721610 0.244483 0.033907 -> 0.721610 
 77 R M 0.152633 0.598174 0.249193 -> 0.598174 
 78 Q M 0.139784 0.553551 0.306664 -> 0.553551 
 79 A B 0.981903 0.015394 0.002703 -> 0.981903 
 80 I B 0.972102 0.022745 0.005152 -> 0.972102 
 81 L M 0.182663 0.595720 0.221617 -> 0.595720 
 82 A B 0.587143 0.315246 0.097611 -> 0.587143 
 83 F B 0.746301 0.237154 0.016544 -> 0.746301 
 84 K E 0.061293 0.465023 0.473684 -> 0.473684 
 85 G B 0.446594 0.416840 0.136566 -> 0.446594 
 86 D E 0.064613 0.446616 0.488771 -> 0.488771 
 87 V B 0.699126 0.265622 0.035252 -> 0.699126 
 88 Y B 0.806096 0.183771 0.010133 -> 0.806096 
 89 T E 0.040466 0.359694 0.599840 -> 0.599840 
 90 G M 0.228519 0.435281 0.336199 -> 0.435281 
 91 L B 0.852182 0.143558 0.004260 -> 0.852182 
 92 Q M 0.024673 0.539708 0.435619 -> 0.539708 
 93 A B 0.603376 0.345178 0.051446 -> 0.603376 
 94 E E 0.005230 0.139614 0.855156 -> 0.855156 
 95 T E 0.063413 0.359900 0.576687 -> 0.576687 
 96 F B 0.734539 0.261431 0.004030 -> 0.734539 
 97 S E 0.021637 0.387926 0.590437 -> 0.590437 
 98 E E 0.004939 0.071977 0.923084 -> 0.923084 
 99 D E 0.006565 0.175187 0.818248 -> 0.818248 
 100 D B 0.565536 0.411713 0.022752 -> 0.565536 
 101 F M 0.481992 0.502774 0.015234 -> 0.502774 
 102 D E 0.009312 0.175270 0.815419 -> 0.815419 
 103 F M 0.239071 0.680705 0.080224 -> 0.680705 
 104 A B 0.986528 0.010457 0.003015 -> 0.986528 
 105 Q M 0.086414 0.630121 0.283465 -> 0.630121 
 106 Q E 0.013301 0.208453 0.778246 -> 0.778246 
 107 H M 0.443900 0.534837 0.021264 -> 0.534837 
 108 L B 0.960590 0.036143 0.003267 -> 0.960590 
 109 R B 0.632292 0.324669 0.043039 -> 0.632292 
 110 M B 0.951381 0.039638 0.008981 -> 0.951381 
 111 L B 0.912321 0.079211 0.008469 -> 0.912321 
 112 S B 0.808657 0.177124 0.014218 -> 0.808657 
 113 G B 0.827809 0.153911 0.018280 -> 0.827809 
 114 L B 0.862769 0.128616 0.008615 -> 0.862769 
 115 Y B 0.677698 0.301154 0.021149 -> 0.677698 
 116 G B 0.761942 0.212723 0.025336 -> 0.761942 
 117 V B 0.833098 0.153550 0.013351 -> 0.833098 
 118 L B 0.879395 0.112008 0.008597 -> 0.879395 
 119 R B 0.483401 0.462504 0.054095 -> 0.483401 
 120 P B 0.729303 0.205778 0.064919 -> 0.729303 
 121 L M 0.314985 0.466398 0.218617 -> 0.466398 
 122 D B 0.430563 0.429140 0.140297 -> 0.430563 
 123 L M 0.262851 0.472150 0.264999 -> 0.472150 
 124 M B 0.791835 0.161487 0.046678 -> 0.791835 
 125 Q M 0.257926 0.538307 0.203767 -> 0.538307 
 126 P B 0.355916 0.339599 0.304485 -> 0.355916 
 127 Y B 0.478636 0.448697 0.072667 -> 0.478636 
 128 R M 0.295528 0.527331 0.177141 -> 0.527331 
 129 L B 0.902503 0.079346 0.018151 -> 0.902503 
 130 E M 0.187874 0.606807 0.205318 -> 0.606807 
 131 M B 0.444518 0.354860 0.200621 -> 0.444518 
 132 G E 0.108579 0.334955 0.556467 -> 0.556467 
 133 I M 0.401329 0.535577 0.063094 -> 0.535577 
 134 R E 0.021491 0.359126 0.619383 -> 0.619383 
 135 L B 0.731534 0.252654 0.015812 -> 0.731534 
 136 E E 0.017902 0.248408 0.733690 -> 0.733690 
 137 N E 0.105193 0.443949 0.450857 -> 0.450857 
 138 A E 0.117353 0.359930 0.522717 -> 0.522717 
 139 R E 0.003801 0.094892 0.901307 -> 0.901307 
 140 G E 0.076790 0.313109 0.610101 -> 0.610101 
 141 K E 0.041152 0.370220 0.588628 -> 0.588628 
 142 D M 0.110902 0.533901 0.355196 -> 0.533901 
 143 L B 0.941135 0.046803 0.012062 -> 0.941135 
 144 Y M 0.166315 0.729758 0.103927 -> 0.729758 
 145 Q E 0.008566 0.145526 0.845908 -> 0.845908 
 146 F B 0.503954 0.439313 0.056734 -> 0.503954 
 147 W B 0.837853 0.145947 0.016200 -> 0.837853 
 148 G M 0.311990 0.610270 0.077740 -> 0.610270 
 149 D E 0.010051 0.168378 0.821571 -> 0.821571 
 150 I M 0.122596 0.626013 0.251392 -> 0.626013 
 151 I B 0.947759 0.043833 0.008408 -> 0.947759 
 152 T M 0.237608 0.683700 0.078692 -> 0.683700 
 153 N E 0.003754 0.097914 0.898332 -> 0.898332 
 154 K M 0.034481 0.599617 0.365902 -> 0.599617 
 155 L B 0.979708 0.015928 0.004365 -> 0.979708 
 156 N M 0.201549 0.659331 0.139120 -> 0.659331 
 157 E E 0.003375 0.110029 0.886596 -> 0.886596 
 158 A M 0.387981 0.548664 0.063354 -> 0.548664 
 159 L B 0.776518 0.209903 0.013579 -> 0.776518 
 160 A E 0.009645 0.143028 0.847327 -> 0.847327 
 161 A E 0.004970 0.064910 0.930121 -> 0.930121 
 162 Q E 0.011526 0.253795 0.734679 -> 0.734679 
 163 G E 0.007841 0.100566 0.891594 -> 0.891594 
 164 D E 0.011454 0.313229 0.675318 -> 0.675318 
 165 N E 0.022310 0.400516 0.577174 -> 0.577174 
 166 V B 0.692691 0.294692 0.012617 -> 0.692691 
 167 V B 0.825731 0.165030 0.009239 -> 0.825731 
 168 I B 0.954957 0.042063 0.002980 -> 0.954957 
 169 N B 0.568788 0.395457 0.035755 -> 0.568788 
 170 L B 0.931178 0.064344 0.004479 -> 0.931178 
 171 A B 0.529688 0.397726 0.072586 -> 0.529688 
 172 S B 0.497955 0.447007 0.055038 -> 0.497955 
 173 D E 0.013700 0.274097 0.712203 -> 0.712203 
 174 E M 0.272671 0.483559 0.243770 -> 0.483559 
 175 Y B 0.616983 0.361009 0.022009 -> 0.616983 
 176 F M 0.231631 0.608704 0.159665 -> 0.608704 
 177 K E 0.009389 0.122875 0.867736 -> 0.867736 
 178 S B 0.611609 0.304582 0.083808 -> 0.611609 
 179 V B 0.705482 0.264573 0.029945 -> 0.705482 
 180 K E 0.014219 0.333979 0.651802 -> 0.651802 
 181 P M 0.164723 0.544226 0.291051 -> 0.544226 
 182 K E 0.008957 0.129114 0.861930 -> 0.861930 
 183 K E 0.009539 0.261496 0.728966 -> 0.728966 
 184 L B 0.483679 0.443571 0.072750 -> 0.483679 
 185 N E 0.019250 0.182102 0.798648 -> 0.798648 
 186 A M 0.171547 0.423978 0.404475 -> 0.423978 
 187 E M 0.052733 0.533409 0.413859 -> 0.533409 
 188 I B 0.575322 0.388556 0.036123 -> 0.575322 
 189 I B 0.901495 0.094025 0.004481 -> 0.901495 
 190 K M 0.019125 0.520918 0.459957 -> 0.520918 
 191 P B 0.835204 0.150922 0.013875 -> 0.835204 
 192 V M 0.177290 0.717438 0.105272 -> 0.717438 
 193 F B 0.781743 0.203925 0.014332 -> 0.781743 
 194 L M 0.132528 0.761191 0.106281 -> 0.761191 
 195 D M 0.380991 0.490423 0.128586 -> 0.490423 
 196 E E 0.017420 0.398274 0.584306 -> 0.584306 
 197 K E 0.010138 0.207931 0.781931 -> 0.781931 
 198 N E 0.004575 0.025673 0.969752 -> 0.969752 
 199 G E 0.019389 0.170918 0.809694 -> 0.809694 
 200 K E 0.003379 0.095832 0.900789 -> 0.900789 
 201 F M 0.259398 0.607814 0.132788 -> 0.607814 
 202 K M 0.084640 0.475216 0.440144 -> 0.475216 
 203 I M 0.314053 0.481625 0.204322 -> 0.481625 
 204 I M 0.201934 0.560511 0.237555 -> 0.560511 
 205 S B 0.575615 0.309395 0.114989 -> 0.575615 
 206 F B 0.470021 0.365867 0.164111 -> 0.470021 
 207 Y M 0.313031 0.523224 0.163744 -> 0.523224 
 208 A B 0.858966 0.118414 0.022620 -> 0.858966 
 209 K B 0.421908 0.384443 0.193649 -> 0.421908 
 210 K M 0.080241 0.465338 0.454421 -> 0.465338 
 211 A B 0.733342 0.195846 0.070812 -> 0.733342 
 212 R B 0.590669 0.365941 0.043390 -> 0.590669 
 213 G B 0.860416 0.126483 0.013101 -> 0.860416 
 214 L M 0.250435 0.654345 0.095220 -> 0.654345 
 215 M B 0.980436 0.014678 0.004886 -> 0.980436 
 216 S B 0.946116 0.047049 0.006836 -> 0.946116 
 217 R M 0.214495 0.625854 0.159651 -> 0.625854 
 218 F M 0.455348 0.498077 0.046575 -> 0.498077 
 219 I B 0.961156 0.035111 0.003733 -> 0.961156 
 220 I B 0.695338 0.280965 0.023697 -> 0.695338 
 221 E E 0.003814 0.191379 0.804807 -> 0.804807 
 222 N M 0.059701 0.637854 0.302446 -> 0.637854 
 223 R E 0.002351 0.173555 0.824094 -> 0.824094 
 224 L B 0.635769 0.347535 0.016696 -> 0.635769 
 225 T E 0.015745 0.297596 0.686659 -> 0.686659 
 226 K E 0.001298 0.123922 0.874781 -> 0.874781 
 227 P M 0.184200 0.746338 0.069462 -> 0.746338 
 228 E E 0.003163 0.042231 0.954606 -> 0.954606 
 229 Q E 0.007955 0.324914 0.667130 -> 0.667130 
 230 L B 0.881044 0.114234 0.004721 -> 0.881044 
 231 T E 0.018171 0.343692 0.638137 -> 0.638137 
 232 G E 0.002348 0.063802 0.933851 -> 0.933851 
 233 F B 0.621790 0.370345 0.007865 -> 0.621790 
 234 N E 0.015794 0.264898 0.719309 -> 0.719309 
 235 S E 0.095732 0.432209 0.472060 -> 0.472060 
 236 E E 0.016116 0.308540 0.675344 -> 0.675344 
 237 G E 0.127133 0.338777 0.534090 -> 0.534090 
 238 Y B 0.655700 0.317459 0.026841 -> 0.655700 
 239 F M 0.046715 0.478807 0.474478 -> 0.478807 
 240 F M 0.481362 0.497776 0.020862 -> 0.497776 
 241 D M 0.103199 0.696416 0.200386 -> 0.696416 
 242 E E 0.026098 0.262751 0.711151 -> 0.711151 
 243 D E 0.012518 0.105277 0.882206 -> 0.882206 
 244 S M 0.259821 0.498259 0.241919 -> 0.498259 
 245 S B 0.621070 0.314570 0.064360 -> 0.621070 
 246 S E 0.015737 0.207202 0.777061 -> 0.777061 
 247 N E 0.008406 0.121198 0.870396 -> 0.870396 
 248 G E 0.097176 0.379288 0.523535 -> 0.523535 
 249 E M 0.042527 0.575213 0.382260 -> 0.575213 
 250 L B 0.678758 0.303249 0.017993 -> 0.678758 
 251 V M 0.457608 0.518778 0.023614 -> 0.518778 
 252 F B 0.871376 0.110430 0.018194 -> 0.871376 
 253 K M 0.058630 0.551285 0.390085 -> 0.551285 
 254 R M 0.275876 0.592096 0.132027 -> 0.592096 
 255 Y E 0.083752 0.410722 0.505526 -> 0.505526 
 256 E E 0.011597 0.041079 0.947324 -> 0.947324 
