# Supplementary material for: AcconPred: Predicting Solvent Accessibility and Contact Number Simultaneously by a Multitask Learning Framework under the Conditional Neural Fields Model
Source: Biomed Res Int. 2015 Aug 3;2015:678764. doi: 10.1155/2015/678764 (PMC4538422; doi:10.1155/2015/678764)
Supplement: Supplementary file 1 — Training/testing dataset as well as the CASP11 evaluation dataset could be found in the Supplementary Material. The CASP11 evaluation dataset contains all detailed results from SPINE-X, SANN, ACCpro5 and AcconPred. [file 678764.f1.zip › Supplmentary_Files/105_casp11_domain/casp11_domain_AcconPred/T0807-D1.reso]

# AcconPred: three-state solvent accessibility prediction results 
# probabilities are in the order of B (Bury, pACC: 0-10), M (Medium, pACC: 11-40) and E (Exposed, pACC: 41-100), 
# where pACC is the relative solvent accessibility value calculated by DSSP 
# output format: <position> <one letter amino acid> <predicted label> ... <probabilities> ... -> <maximal probability> 

 1 V E 0.037344 0.116430 0.846226 -> 0.846226 
 2 K E 0.003890 0.075087 0.921023 -> 0.921023 
 3 K E 0.021424 0.385507 0.593069 -> 0.593069 
 4 T E 0.012883 0.197577 0.789540 -> 0.789540 
 5 V M 0.397027 0.583319 0.019655 -> 0.583319 
 6 R E 0.006552 0.179867 0.813581 -> 0.813581 
 7 F B 0.811588 0.179130 0.009282 -> 0.811588 
 8 G E 0.086194 0.432449 0.481357 -> 0.481357 
 9 E E 0.005516 0.152814 0.841669 -> 0.841669 
 10 Q E 0.003651 0.097325 0.899024 -> 0.899024 
 11 A M 0.342702 0.565494 0.091804 -> 0.565494 
 12 A M 0.085041 0.471646 0.443312 -> 0.471646 
 13 V B 0.826709 0.167449 0.005842 -> 0.826709 
 14 P B 0.676084 0.293979 0.029936 -> 0.676084 
 15 A B 0.437859 0.401346 0.160795 -> 0.437859 
 16 I B 0.887736 0.087823 0.024441 -> 0.887736 
 17 G B 0.887061 0.101448 0.011492 -> 0.887061 
 18 L B 0.847893 0.139745 0.012362 -> 0.847893 
 19 G B 0.873223 0.113802 0.012975 -> 0.873223 
 20 T B 0.873438 0.113515 0.013047 -> 0.873438 
 21 W B 0.717075 0.261481 0.021444 -> 0.717075 
 22 Y M 0.296692 0.611705 0.091603 -> 0.611705 
 23 M B 0.731751 0.237882 0.030367 -> 0.731751 
 24 G M 0.233853 0.455312 0.310835 -> 0.455312 
 25 E E 0.025398 0.211643 0.762959 -> 0.762959 
 26 H E 0.056143 0.353642 0.590215 -> 0.590215 
 27 A E 0.133774 0.267126 0.599100 -> 0.599100 
 28 A M 0.232528 0.393862 0.373610 -> 0.393862 
 29 Q E 0.021207 0.280081 0.698712 -> 0.698712 
 30 R M 0.052698 0.603117 0.344185 -> 0.603117 
 31 Q E 0.008138 0.101002 0.890860 -> 0.890860 
 32 Q M 0.040221 0.493285 0.466494 -> 0.493285 
 33 E B 0.827623 0.146138 0.026240 -> 0.827623 
 34 V M 0.468661 0.515586 0.015754 -> 0.515586 
 35 A E 0.016444 0.290480 0.693076 -> 0.693076 
 36 A B 0.919026 0.071103 0.009871 -> 0.919026 
 37 L B 0.981149 0.016849 0.002001 -> 0.981149 
 38 R E 0.009488 0.479714 0.510798 -> 0.510798 
 39 A M 0.259686 0.680988 0.059326 -> 0.680988 
 40 G B 0.987550 0.007799 0.004651 -> 0.987550 
 41 I B 0.604037 0.375600 0.020363 -> 0.604037 
 42 D E 0.017563 0.183937 0.798500 -> 0.798500 
 43 H M 0.088868 0.644203 0.266930 -> 0.644203 
 44 G B 0.433976 0.249114 0.316910 -> 0.433976 
 45 L B 0.900688 0.094624 0.004687 -> 0.900688 
 46 T M 0.404896 0.530106 0.064998 -> 0.530106 
 47 V B 0.794974 0.191834 0.013192 -> 0.794974 
 48 I B 0.911607 0.083307 0.005086 -> 0.911607 
 49 D B 0.731595 0.257140 0.011265 -> 0.731595 
 50 T B 0.885485 0.104093 0.010422 -> 0.885485 
 51 A B 0.883186 0.107100 0.009714 -> 0.883186 
 52 E M 0.117882 0.622764 0.259354 -> 0.622764 
 53 M B 0.570949 0.343448 0.085603 -> 0.570949 
 54 Y B 0.503071 0.419498 0.077431 -> 0.503071 
 55 A B 0.468702 0.399593 0.131704 -> 0.468702 
 56 D E 0.051329 0.308101 0.640570 -> 0.640570 
 57 G M 0.199740 0.483059 0.317201 -> 0.483059 
 58 G E 0.081793 0.389013 0.529193 -> 0.529193 
 59 A B 0.778763 0.189325 0.031913 -> 0.778763 
 60 E B 0.540121 0.375593 0.084286 -> 0.540121 
 61 E E 0.017976 0.280337 0.701687 -> 0.701687 
 62 V M 0.437659 0.533146 0.029195 -> 0.533146 
 63 V B 0.957640 0.037942 0.004418 -> 0.957640 
 64 G B 0.497508 0.435638 0.066854 -> 0.497508 
 65 Q E 0.020244 0.376835 0.602921 -> 0.602921 
 66 A B 0.759177 0.222047 0.018776 -> 0.759177 
 67 I B 0.626487 0.350404 0.023108 -> 0.626487 
 68 R E 0.008103 0.204831 0.787066 -> 0.787066 
 69 G E 0.019075 0.096633 0.884292 -> 0.884292 
 70 L M 0.306481 0.624981 0.068538 -> 0.624981 
 71 R M 0.272056 0.587342 0.140601 -> 0.587342 
 72 D E 0.011151 0.130021 0.858828 -> 0.858828 
 73 R E 0.018957 0.350589 0.630455 -> 0.630455 
 74 V B 0.768687 0.222767 0.008546 -> 0.768687 
 75 V B 0.559136 0.420133 0.020731 -> 0.559136 
 76 L B 0.962637 0.036351 0.001012 -> 0.962637 
 77 V B 0.964603 0.033820 0.001577 -> 0.964603 
 78 S B 0.967169 0.029947 0.002884 -> 0.967169 
 79 K B 0.634732 0.333057 0.032211 -> 0.634732 
 80 V B 0.905139 0.089252 0.005609 -> 0.905139 
 81 Y M 0.413542 0.509730 0.076728 -> 0.509730 
 82 P B 0.448496 0.377323 0.174181 -> 0.448496 
 83 W M 0.135955 0.445074 0.418971 -> 0.445074 
 84 H E 0.100213 0.308938 0.590848 -> 0.590848 
 85 A M 0.306848 0.401275 0.291877 -> 0.401275 
 86 G M 0.176464 0.462032 0.361504 -> 0.462032 
 87 K E 0.023102 0.405689 0.571209 -> 0.571209 
 88 A E 0.003926 0.044486 0.951588 -> 0.951588 
 89 A M 0.125394 0.623750 0.250856 -> 0.623750 
 90 M B 0.963800 0.031161 0.005039 -> 0.963800 
 91 H M 0.057693 0.741181 0.201126 -> 0.741181 
 92 R E 0.002801 0.114905 0.882294 -> 0.882294 
 93 A M 0.448883 0.513018 0.038099 -> 0.513018 
 94 C B 0.984807 0.010532 0.004660 -> 0.984807 
 95 E M 0.040830 0.526875 0.432295 -> 0.526875 
 96 N E 0.015630 0.324809 0.659561 -> 0.659561 
 97 S B 0.858024 0.136576 0.005401 -> 0.858024 
 98 L B 0.684496 0.307664 0.007840 -> 0.684496 
 99 R E 0.003392 0.054516 0.942092 -> 0.942092 
 100 R E 0.015126 0.445237 0.539637 -> 0.539637 
 101 L B 0.820407 0.172246 0.007347 -> 0.820407 
 102 Q E 0.012318 0.117717 0.869965 -> 0.869965 
 103 T M 0.423488 0.538634 0.037878 -> 0.538634 
 104 D E 0.079930 0.457564 0.462506 -> 0.462506 
 105 Y M 0.238688 0.703822 0.057490 -> 0.703822 
 106 L B 0.974511 0.022831 0.002658 -> 0.974511 
 107 D B 0.602120 0.379944 0.017936 -> 0.602120 
 108 M B 0.976379 0.021498 0.002123 -> 0.976379 
 109 Y B 0.882055 0.113475 0.004470 -> 0.882055 
 110 L B 0.945605 0.051239 0.003156 -> 0.945605 
 111 L B 0.953974 0.044331 0.001694 -> 0.953974 
 112 H B 0.770895 0.216815 0.012290 -> 0.770895 
 113 W B 0.560324 0.391135 0.048541 -> 0.560324 
 114 R M 0.286575 0.573736 0.139689 -> 0.573736 
 115 G E 0.082877 0.355527 0.561596 -> 0.561596 
 116 D E 0.013430 0.137320 0.849251 -> 0.849251 
 117 I M 0.257066 0.619346 0.123588 -> 0.619346 
 118 P M 0.119705 0.528018 0.352277 -> 0.528018 
 119 L B 0.632542 0.326621 0.040837 -> 0.632542 
 120 Q E 0.037243 0.372615 0.590142 -> 0.590142 
 121 E M 0.054361 0.526880 0.418760 -> 0.526880 
 122 T B 0.971996 0.023480 0.004523 -> 0.971996 
 123 V B 0.878989 0.115742 0.005268 -> 0.878989 
 124 E E 0.020972 0.390048 0.588980 -> 0.588980 
 125 A B 0.782496 0.211838 0.005666 -> 0.782496 
 126 M B 0.992388 0.006670 0.000942 -> 0.992388 
 127 E M 0.017348 0.542257 0.440395 -> 0.542257 
 128 K E 0.002650 0.239050 0.758300 -> 0.758300 
 129 L B 0.951826 0.041806 0.006368 -> 0.951826 
 130 V M 0.120234 0.753510 0.126256 -> 0.753510 
 131 A E 0.001140 0.025904 0.972956 -> 0.972956 
 132 E E 0.001987 0.123865 0.874148 -> 0.874148 
 133 G E 0.165891 0.303177 0.530932 -> 0.530932 
 134 K M 0.066646 0.692245 0.241110 -> 0.692245 
 135 I B 0.931821 0.063421 0.004758 -> 0.931821 
 136 R M 0.154514 0.662414 0.183072 -> 0.662414 
 137 R B 0.498796 0.469132 0.032072 -> 0.498796 
 138 W B 0.910418 0.088367 0.001215 -> 0.910418 
 139 G B 0.935035 0.063054 0.001911 -> 0.935035 
 140 V B 0.892033 0.095620 0.012347 -> 0.892033 
 141 S B 0.815127 0.159802 0.025071 -> 0.815127 
 142 N M 0.154317 0.452096 0.393587 -> 0.452096 
 143 L B 0.527003 0.425662 0.047334 -> 0.527003 
 144 D E 0.023274 0.462185 0.514541 -> 0.514541 
 145 I M 0.180607 0.738372 0.081021 -> 0.738372 
 146 E E 0.006075 0.091754 0.902171 -> 0.902171 
 147 D M 0.216251 0.695003 0.088746 -> 0.695003 
 148 M B 0.963857 0.031096 0.005047 -> 0.963857 
 149 Q M 0.037083 0.570315 0.392602 -> 0.570315 
 150 A M 0.140905 0.641197 0.217898 -> 0.641197 
 151 L B 0.944093 0.051855 0.004052 -> 0.944093 
 152 W M 0.382222 0.587331 0.030447 -> 0.587331 
 153 R E 0.005142 0.067806 0.927052 -> 0.927052 
 154 T M 0.106098 0.554090 0.339813 -> 0.554090 
 155 A M 0.225977 0.455845 0.318178 -> 0.455845 
 156 D E 0.007019 0.101713 0.891268 -> 0.891268 
 157 G E 0.064927 0.284967 0.650106 -> 0.650106 
 158 E E 0.021018 0.301539 0.677443 -> 0.677443 
 159 H M 0.094335 0.599422 0.306243 -> 0.599422 
 160 C B 0.928167 0.069020 0.002814 -> 0.928167 
 161 A B 0.818035 0.161614 0.020351 -> 0.818035 
 162 T B 0.921688 0.072150 0.006162 -> 0.921688 
 163 N B 0.879191 0.113644 0.007164 -> 0.879191 
 164 Q B 0.824499 0.160866 0.014635 -> 0.824499 
 165 V B 0.888317 0.102550 0.009133 -> 0.888317 
 166 L B 0.654972 0.322722 0.022306 -> 0.654972 
 167 Y B 0.654699 0.314457 0.030844 -> 0.654699 
 168 H B 0.587507 0.377399 0.035094 -> 0.587507 
 169 L B 0.859886 0.120781 0.019333 -> 0.859886 
 170 A B 0.843028 0.127307 0.029665 -> 0.843028 
 171 S B 0.518104 0.348755 0.133141 -> 0.518104 
 172 R M 0.223367 0.529837 0.246796 -> 0.529837 
 173 G M 0.236664 0.412328 0.351007 -> 0.412328 
 174 I M 0.392679 0.483535 0.123787 -> 0.483535 
 175 E M 0.215896 0.485569 0.298535 -> 0.485569 
 176 Y E 0.058543 0.414165 0.527291 -> 0.527291 
 177 D E 0.038698 0.411538 0.549764 -> 0.549764 
 178 L B 0.952245 0.036372 0.011383 -> 0.952245 
 179 L B 0.532208 0.451783 0.016009 -> 0.532208 
 180 P E 0.006203 0.123884 0.869913 -> 0.869913 
 181 W M 0.331261 0.643169 0.025569 -> 0.643169 
 182 C B 0.981831 0.016359 0.001810 -> 0.981831 
 183 Q E 0.008020 0.211719 0.780261 -> 0.780261 
 184 Q E 0.001017 0.042499 0.956483 -> 0.956483 
 185 H M 0.066987 0.720545 0.212468 -> 0.720545 
 186 S E 0.033022 0.207862 0.759116 -> 0.759116 
 187 L B 0.780509 0.209418 0.010072 -> 0.780509 
 188 P B 0.492205 0.397272 0.110523 -> 0.492205 
 189 V B 0.826238 0.168655 0.005107 -> 0.826238 
 190 M B 0.738626 0.244795 0.016580 -> 0.738626 
 191 A B 0.947603 0.050262 0.002135 -> 0.947603 
 192 Y B 0.624992 0.349507 0.025501 -> 0.624992 
 193 C B 0.667153 0.306169 0.026678 -> 0.667153 
 194 P B 0.820961 0.137342 0.041696 -> 0.820961 
 195 L B 0.587230 0.337325 0.075445 -> 0.587230 
 196 A B 0.494888 0.328156 0.176957 -> 0.494888 
 197 Q E 0.109664 0.434469 0.455868 -> 0.455868 
 198 A E 0.297713 0.333061 0.369226 -> 0.369226 
 199 G E 0.132257 0.358740 0.509003 -> 0.509003 
 200 R M 0.100263 0.548448 0.351289 -> 0.548448 
 201 L B 0.637915 0.306495 0.055590 -> 0.637915 
 202 R E 0.030999 0.381870 0.587131 -> 0.587131 
 203 D E 0.028181 0.203178 0.768641 -> 0.768641 
 204 G E 0.123624 0.318512 0.557864 -> 0.557864 
 205 L B 0.528112 0.388482 0.083406 -> 0.528112 
 206 F M 0.405359 0.485240 0.109401 -> 0.485240 
 207 Q E 0.011217 0.211912 0.776870 -> 0.776870 
 208 H M 0.091245 0.603785 0.304970 -> 0.603785 
 209 S E 0.017824 0.146420 0.835756 -> 0.835756 
 210 D M 0.058651 0.531871 0.409478 -> 0.531871 
 211 I B 0.963238 0.023941 0.012821 -> 0.963238 
 212 I M 0.149429 0.714026 0.136546 -> 0.714026 
 213 N E 0.007984 0.216911 0.775105 -> 0.775105 
 214 M B 0.672635 0.321424 0.005941 -> 0.672635 
 215 A B 0.968149 0.027171 0.004680 -> 0.968149 
 216 N E 0.002137 0.088245 0.909618 -> 0.909618 
 217 A E 0.001540 0.026548 0.971912 -> 0.971912 
 218 R M 0.038921 0.684984 0.276095 -> 0.684984 
 219 G E 0.005010 0.047317 0.947673 -> 0.947673 
 220 I M 0.475590 0.505369 0.019041 -> 0.505369 
 221 T E 0.098138 0.417001 0.484861 -> 0.484861 
 222 V B 0.596400 0.380854 0.022745 -> 0.596400 
 223 A B 0.911156 0.086974 0.001870 -> 0.911156 
 224 Q B 0.635252 0.337948 0.026800 -> 0.635252 
 225 L B 0.965407 0.025481 0.009111 -> 0.965407 
 226 L B 0.987619 0.011326 0.001055 -> 0.987619 
 227 L B 0.959935 0.037859 0.002206 -> 0.959935 
 228 A B 0.607187 0.362406 0.030407 -> 0.607187 
 229 W B 0.704203 0.283130 0.012667 -> 0.704203 
 230 V B 0.943137 0.051052 0.005811 -> 0.943137 
 231 I B 0.550774 0.421227 0.027999 -> 0.550774 
 232 R E 0.027941 0.291113 0.680946 -> 0.680946 
 233 H M 0.180764 0.769216 0.050020 -> 0.769216 
 234 P E 0.008351 0.119753 0.871896 -> 0.871896 
 235 G B 0.496504 0.419463 0.084033 -> 0.496504 
 236 V B 0.850488 0.144025 0.005487 -> 0.850488 
 237 L B 0.829003 0.166754 0.004243 -> 0.829003 
 238 A B 0.937181 0.058453 0.004366 -> 0.937181 
 239 I B 0.946680 0.051340 0.001980 -> 0.946680 
 240 P B 0.691364 0.283975 0.024661 -> 0.691364 
 241 K E 0.054279 0.469416 0.476305 -> 0.476305 
 242 A B 0.823474 0.148837 0.027689 -> 0.823474 
 243 A E 0.102034 0.361487 0.536479 -> 0.536479 
 244 S M 0.037382 0.508918 0.453699 -> 0.508918 
 245 I M 0.060381 0.637993 0.301625 -> 0.637993 
 246 E E 0.002095 0.062883 0.935022 -> 0.935022 
 247 H M 0.093124 0.755006 0.151870 -> 0.755006 
 248 V B 0.982362 0.013256 0.004382 -> 0.982362 
 249 V M 0.091132 0.686741 0.222127 -> 0.686741 
 250 Q E 0.008030 0.119540 0.872430 -> 0.872430 
 251 N B 0.680737 0.301789 0.017474 -> 0.680737 
 252 A B 0.828361 0.164763 0.006876 -> 0.828361 
 253 A E 0.009631 0.135524 0.854845 -> 0.854845 
 254 A M 0.400119 0.443096 0.156785 -> 0.443096 
 255 L M 0.269344 0.595500 0.135155 -> 0.595500 
 256 D E 0.003956 0.079412 0.916632 -> 0.916632 
 257 I M 0.415993 0.558802 0.025204 -> 0.558802 
 258 V E 0.004771 0.124178 0.871051 -> 0.871051 
 259 L B 0.777513 0.217806 0.004681 -> 0.777513 
 260 S M 0.028215 0.541208 0.430577 -> 0.541208 
 261 G E 0.003952 0.087235 0.908814 -> 0.908814 
 262 E E 0.003949 0.038561 0.957490 -> 0.957490 
 263 E B 0.481149 0.475181 0.043670 -> 0.481149 
 264 L M 0.457515 0.517722 0.024763 -> 0.517722 
 265 A E 0.014694 0.194144 0.791162 -> 0.791162 
 266 Q M 0.069549 0.728430 0.202021 -> 0.728430 
 267 L B 0.969638 0.025944 0.004418 -> 0.969638 
 268 D M 0.057322 0.580996 0.361683 -> 0.580996 
 269 R E 0.003213 0.069355 0.927432 -> 0.927432 
 270 L B 0.536915 0.423456 0.039628 -> 0.536915 
 271 Y M 0.257275 0.661887 0.080837 -> 0.661887 
 272 P E 0.032909 0.237330 0.729761 -> 0.729761 
 273 P E 0.066146 0.449200 0.484653 -> 0.484653 
 274 P E 0.078813 0.358040 0.563148 -> 0.563148 
 275 Q E 0.007952 0.093556 0.898492 -> 0.898492 
 276 R E 0.055595 0.432570 0.511835 -> 0.511835 
 277 K E 0.019739 0.250455 0.729806 -> 0.729806 
 278 N E 0.023379 0.257938 0.718683 -> 0.718683 
 279 R E 0.026607 0.176411 0.796981 -> 0.796981 
 280 L M 0.100412 0.487715 0.411873 -> 0.487715 
 281 D E 0.011557 0.162813 0.825630 -> 0.825630 
 282 M E 0.072377 0.273112 0.654510 -> 0.654510 
 283 V E 0.026739 0.228399 0.744862 -> 0.744862 
