# Supplementary material for: AcconPred: Predicting Solvent Accessibility and Contact Number Simultaneously by a Multitask Learning Framework under the Conditional Neural Fields Model
Source: Biomed Res Int. 2015 Aug 3;2015:678764. doi: 10.1155/2015/678764 (PMC4538422; doi:10.1155/2015/678764)
Supplement: Supplementary file 1 — Training/testing dataset as well as the CASP11 evaluation dataset could be found in the Supplementary Material. The CASP11 evaluation dataset contains all detailed results from SPINE-X, SANN, ACCpro5 and AcconPred. [file 678764.f1.zip › Supplmentary_Files/105_casp11_domain/casp11_domain_AcconPred/T0808-D1.reso]

# AcconPred: three-state solvent accessibility prediction results 
# probabilities are in the order of B (Bury, pACC: 0-10), M (Medium, pACC: 11-40) and E (Exposed, pACC: 41-100), 
# where pACC is the relative solvent accessibility value calculated by DSSP 
# output format: <position> <one letter amino acid> <predicted label> ... <probabilities> ... -> <maximal probability> 

 1 Q E 0.005018 0.031300 0.963682 -> 0.963682 
 2 P E 0.016241 0.247711 0.736049 -> 0.736049 
 3 Q E 0.021012 0.339698 0.639291 -> 0.639291 
 4 Q E 0.007511 0.157536 0.834952 -> 0.834952 
 5 V B 0.832068 0.165508 0.002424 -> 0.832068 
 6 V M 0.071030 0.658739 0.270231 -> 0.658739 
 7 V B 0.937730 0.058946 0.003324 -> 0.937730 
 8 G B 0.621213 0.336895 0.041891 -> 0.621213 
 9 V B 0.878348 0.111139 0.010513 -> 0.878348 
 10 S B 0.526509 0.343908 0.129583 -> 0.526509 
 11 G B 0.542593 0.352702 0.104705 -> 0.542593 
 12 N B 0.642773 0.307815 0.049412 -> 0.642773 
 13 G B 0.880511 0.102550 0.016939 -> 0.880511 
 14 Y B 0.508896 0.443944 0.047160 -> 0.508896 
 15 V B 0.614667 0.351066 0.034267 -> 0.614667 
 16 T M 0.153539 0.519839 0.326621 -> 0.519839 
 17 R E 0.047771 0.425551 0.526678 -> 0.526678 
 18 Q E 0.022571 0.227778 0.749652 -> 0.749652 
 19 Q E 0.047107 0.363957 0.588936 -> 0.588936 
 20 D E 0.020124 0.146760 0.833116 -> 0.833116 
 21 G E 0.046503 0.299902 0.653595 -> 0.653595 
 22 A B 0.410631 0.406145 0.183224 -> 0.410631 
 23 R E 0.021308 0.371021 0.607672 -> 0.607672 
 24 I B 0.647467 0.326635 0.025899 -> 0.647467 
 25 T M 0.097947 0.522180 0.379873 -> 0.522180 
 26 Q E 0.042806 0.255504 0.701690 -> 0.701690 
 27 R E 0.029242 0.303536 0.667222 -> 0.667222 
 28 G B 0.577535 0.305573 0.116892 -> 0.577535 
 29 V B 0.792205 0.191476 0.016320 -> 0.792205 
 30 T E 0.071800 0.350173 0.578027 -> 0.578027 
 31 H M 0.077123 0.507397 0.415480 -> 0.507397 
 32 W B 0.745034 0.244749 0.010217 -> 0.745034 
 33 T E 0.046599 0.368637 0.584764 -> 0.584764 
 34 N M 0.071219 0.562665 0.366115 -> 0.562665 
 35 P E 0.082168 0.364373 0.553459 -> 0.553459 
 36 K E 0.007492 0.137932 0.854575 -> 0.854575 
 37 S M 0.294475 0.530773 0.174753 -> 0.530773 
 38 I M 0.280730 0.597926 0.121344 -> 0.597926 
 39 V B 0.853157 0.129799 0.017044 -> 0.853157 
 40 S M 0.329254 0.572893 0.097853 -> 0.572893 
 41 I B 0.939662 0.054953 0.005386 -> 0.939662 
 42 Y M 0.288290 0.651702 0.060008 -> 0.651702 
 43 F B 0.981591 0.017326 0.001083 -> 0.981591 
 44 Y M 0.196891 0.722022 0.081087 -> 0.722022 
 45 L B 0.932868 0.061260 0.005872 -> 0.932868 
 46 H E 0.005138 0.201499 0.793363 -> 0.793363 
 47 Q E 0.021995 0.407322 0.570683 -> 0.570683 
 48 P E 0.031049 0.267281 0.701670 -> 0.701670 
 49 T M 0.242938 0.545024 0.212038 -> 0.545024 
 50 T E 0.013326 0.333942 0.652732 -> 0.652732 
 51 A B 0.901866 0.096245 0.001889 -> 0.901866 
 52 D M 0.045271 0.714725 0.240004 -> 0.714725 
 53 L B 0.938344 0.058005 0.003651 -> 0.938344 
 54 S B 0.512747 0.445274 0.041980 -> 0.512747 
 55 L B 0.945433 0.052486 0.002081 -> 0.945433 
 56 Y M 0.056658 0.710211 0.233131 -> 0.710211 
 57 A B 0.676192 0.232691 0.091117 -> 0.676192 
 58 K E 0.003200 0.146634 0.850166 -> 0.850166 
 59 G E 0.138975 0.375711 0.485314 -> 0.485314 
 60 H E 0.011069 0.235054 0.753877 -> 0.753877 
 61 S B 0.735829 0.255015 0.009156 -> 0.735829 
 62 E M 0.027579 0.539589 0.432833 -> 0.539589 
 63 I B 0.847479 0.150020 0.002501 -> 0.847479 
 64 K M 0.037926 0.720528 0.241546 -> 0.720528 
 65 V B 0.981605 0.017644 0.000752 -> 0.981605 
 66 S M 0.138270 0.674483 0.187247 -> 0.674483 
 67 Y B 0.608445 0.359304 0.032251 -> 0.608445 
 68 G E 0.032273 0.356606 0.611121 -> 0.611121 
 69 K E 0.001717 0.043265 0.955018 -> 0.955018 
 70 K E 0.005637 0.225801 0.768561 -> 0.768561 
 71 G E 0.146769 0.382351 0.470880 -> 0.470880 
 72 F M 0.282726 0.679936 0.037338 -> 0.679936 
 73 K E 0.002459 0.107626 0.889916 -> 0.889916 
 74 V B 0.672056 0.321784 0.006160 -> 0.672056 
 75 N E 0.012138 0.322600 0.665263 -> 0.665263 
 76 L B 0.802298 0.193761 0.003941 -> 0.802298 
 77 Q E 0.003345 0.220451 0.776204 -> 0.776204 
 78 S M 0.164639 0.465520 0.369841 -> 0.465520 
 79 N E 0.036637 0.305462 0.657901 -> 0.657901 
 80 D E 0.022669 0.199385 0.777947 -> 0.777947 
 81 F M 0.284560 0.559649 0.155791 -> 0.559649 
 82 T M 0.057336 0.495772 0.446893 -> 0.495772 
 83 K E 0.001742 0.079876 0.918382 -> 0.918382 
 84 V B 0.631890 0.359839 0.008272 -> 0.631890 
 85 P E 0.012186 0.278949 0.708865 -> 0.708865 
 86 V B 0.628508 0.352787 0.018704 -> 0.628508 
 87 G M 0.382963 0.484703 0.132333 -> 0.484703 
 88 S E 0.028899 0.405604 0.565497 -> 0.565497 
 89 I B 0.789408 0.204390 0.006202 -> 0.789408 
 90 D E 0.015822 0.445955 0.538223 -> 0.538223 
 91 I B 0.820659 0.173049 0.006292 -> 0.820659 
 92 R E 0.007263 0.218065 0.774672 -> 0.774672 
 93 Q E 0.010555 0.151078 0.838367 -> 0.838367 
 94 A M 0.256110 0.478532 0.265357 -> 0.478532 
 95 G B 0.551885 0.313733 0.134381 -> 0.551885 
 96 Y M 0.169890 0.689624 0.140486 -> 0.689624 
 97 V B 0.845132 0.144511 0.010357 -> 0.845132 
 98 R M 0.044457 0.660924 0.294620 -> 0.660924 
 99 I B 0.979669 0.018493 0.001839 -> 0.979669 
 100 D M 0.234687 0.639529 0.125784 -> 0.639529 
 101 L B 0.951998 0.045599 0.002403 -> 0.951998 
 102 Q M 0.100459 0.699625 0.199915 -> 0.699625 
 103 G B 0.532656 0.289636 0.177708 -> 0.532656 
 104 V M 0.294859 0.523088 0.182053 -> 0.523088 
 105 S M 0.313117 0.434483 0.252400 -> 0.434483 
 106 K E 0.047253 0.364294 0.588454 -> 0.588454 
 107 S E 0.015073 0.146519 0.838408 -> 0.838408 
 108 G E 0.115548 0.364407 0.520045 -> 0.520045 
 109 E E 0.022694 0.208402 0.768903 -> 0.768903 
 110 G B 0.389424 0.383722 0.226854 -> 0.389424 
 111 F B 0.462766 0.460916 0.076317 -> 0.462766 
 112 G B 0.559702 0.226928 0.213370 -> 0.559702 
 113 E M 0.068711 0.543588 0.387701 -> 0.543588 
 114 I B 0.806783 0.187273 0.005944 -> 0.806783 
 115 K E 0.024065 0.472719 0.503216 -> 0.503216 
 116 Q M 0.263049 0.619111 0.117840 -> 0.619111 
 117 L B 0.895873 0.099276 0.004851 -> 0.895873 
 118 I M 0.262716 0.664636 0.072648 -> 0.664636 
 119 A B 0.885506 0.099993 0.014501 -> 0.885506 
 120 D M 0.114167 0.606556 0.279277 -> 0.606556 
 121 N E 0.048906 0.364126 0.586967 -> 0.586967 
 122 V M 0.257066 0.498830 0.244104 -> 0.498830 
 123 T E 0.019612 0.172933 0.807455 -> 0.807455 
 124 G E 0.038356 0.280718 0.680926 -> 0.680926 
 125 K E 0.005404 0.127415 0.867181 -> 0.867181 
 126 S M 0.204314 0.523289 0.272397 -> 0.523289 
 127 N E 0.057721 0.410989 0.531290 -> 0.531290 
 128 Y M 0.247264 0.625994 0.126743 -> 0.625994 
 129 V M 0.191997 0.554384 0.253619 -> 0.554384 
 130 K E 0.010964 0.149297 0.839739 -> 0.839739 
 131 D E 0.004444 0.053851 0.941706 -> 0.941706 
