# Supplementary material for: AcconPred: Predicting Solvent Accessibility and Contact Number Simultaneously by a Multitask Learning Framework under the Conditional Neural Fields Model
Source: Biomed Res Int. 2015 Aug 3;2015:678764. doi: 10.1155/2015/678764 (PMC4538422; doi:10.1155/2015/678764)
Supplement: Supplementary file 1 — Training/testing dataset as well as the CASP11 evaluation dataset could be found in the Supplementary Material. The CASP11 evaluation dataset contains all detailed results from SPINE-X, SANN, ACCpro5 and AcconPred. [file 678764.f1.zip › Supplmentary_Files/105_casp11_domain/casp11_domain_AcconPred/T0808-D2.reso]

# AcconPred: three-state solvent accessibility prediction results 
# probabilities are in the order of B (Bury, pACC: 0-10), M (Medium, pACC: 11-40) and E (Exposed, pACC: 41-100), 
# where pACC is the relative solvent accessibility value calculated by DSSP 
# output format: <position> <one letter amino acid> <predicted label> ... <probabilities> ... -> <maximal probability> 

 1 F E 0.001303 0.020193 0.978504 -> 0.978504 
 2 S E 0.012401 0.171641 0.815958 -> 0.815958 
 3 D E 0.017022 0.170420 0.812558 -> 0.812558 
 4 Y E 0.067767 0.375047 0.557186 -> 0.557186 
 5 W M 0.312969 0.492367 0.194664 -> 0.492367 
 6 G B 0.433895 0.320252 0.245853 -> 0.433895 
 7 R M 0.148272 0.431300 0.420428 -> 0.431300 
 8 R E 0.072243 0.359281 0.568476 -> 0.568476 
 9 G B 0.688723 0.252192 0.059085 -> 0.688723 
 10 P M 0.275206 0.458082 0.266712 -> 0.458082 
 11 S B 0.653851 0.289879 0.056270 -> 0.653851 
 12 V B 0.688363 0.282969 0.028668 -> 0.688363 
 13 H M 0.350658 0.475915 0.173427 -> 0.475915 
 14 L B 0.818843 0.168774 0.012383 -> 0.818843 
 15 G M 0.205413 0.450546 0.344041 -> 0.450546 
 16 Y M 0.409208 0.537979 0.052813 -> 0.537979 
 17 A E 0.040662 0.339397 0.619941 -> 0.619941 
 18 L M 0.407791 0.517674 0.074535 -> 0.517674 
 19 P E 0.083574 0.376282 0.540144 -> 0.540144 
 20 E E 0.006593 0.083156 0.910251 -> 0.910251 
 21 G E 0.026167 0.150910 0.822923 -> 0.822923 
 22 D M 0.084358 0.474220 0.441422 -> 0.474220 
 23 T B 0.443623 0.367381 0.188996 -> 0.443623 
 24 E M 0.052024 0.484750 0.463226 -> 0.484750 
 25 W M 0.443307 0.459150 0.097544 -> 0.459150 
 26 F B 0.734769 0.227831 0.037400 -> 0.734769 
 27 Y M 0.444817 0.484982 0.070202 -> 0.484982 
 28 N B 0.619282 0.303704 0.077013 -> 0.619282 
 29 E M 0.412668 0.453866 0.133466 -> 0.453866 
 30 I B 0.835267 0.152782 0.011951 -> 0.835267 
 31 T M 0.118024 0.608381 0.273595 -> 0.608381 
 32 V B 0.744133 0.243952 0.011915 -> 0.744133 
 33 P M 0.113387 0.602244 0.284368 -> 0.602244 
 34 K E 0.008216 0.132978 0.858806 -> 0.858806 
 35 E E 0.018556 0.227988 0.753456 -> 0.753456 
 36 G E 0.044779 0.211910 0.743312 -> 0.743312 
 37 E E 0.081125 0.410910 0.507965 -> 0.507965 
 38 T M 0.320344 0.419158 0.260498 -> 0.419158 
 39 M M 0.322942 0.480753 0.196305 -> 0.480753 
 40 H M 0.386061 0.469964 0.143975 -> 0.469964 
 41 S B 0.787103 0.186856 0.026041 -> 0.787103 
 42 Y B 0.685208 0.299259 0.015533 -> 0.685208 
 43 Y B 0.836978 0.156299 0.006723 -> 0.836978 
 44 M B 0.915212 0.074045 0.010743 -> 0.915212 
 45 A B 0.931046 0.064594 0.004360 -> 0.931046 
 46 A B 0.776858 0.202162 0.020979 -> 0.776858 
 47 G B 0.465125 0.312357 0.222518 -> 0.465125 
 48 F B 0.554967 0.377767 0.067267 -> 0.554967 
 49 G E 0.090198 0.358426 0.551376 -> 0.551376 
 50 E M 0.092250 0.491150 0.416600 -> 0.491150 
 51 G B 0.762810 0.203322 0.033868 -> 0.762810 
 52 Y B 0.594413 0.372704 0.032883 -> 0.594413 
 53 F B 0.821779 0.172443 0.005779 -> 0.821779 
 54 G B 0.901000 0.087780 0.011220 -> 0.901000 
 55 M B 0.948929 0.046671 0.004400 -> 0.948929 
 56 Q B 0.750836 0.229853 0.019311 -> 0.750836 
 57 Y M 0.254396 0.577589 0.168016 -> 0.577589 
 58 N M 0.268741 0.510970 0.220289 -> 0.510970 
 59 S M 0.376705 0.478517 0.144778 -> 0.478517 
 60 P E 0.013996 0.092715 0.893289 -> 0.893289 
 61 T E 0.058599 0.353587 0.587813 -> 0.587813 
 62 E E 0.043753 0.381784 0.574463 -> 0.574463 
 63 R M 0.175443 0.645232 0.179325 -> 0.645232 
 64 R M 0.153410 0.726584 0.120005 -> 0.726584 
 65 I B 0.965948 0.032692 0.001360 -> 0.965948 
 66 L B 0.947487 0.050639 0.001875 -> 0.947487 
 67 F B 0.983861 0.015411 0.000728 -> 0.983861 
 68 S B 0.922946 0.073784 0.003270 -> 0.922946 
 69 V B 0.947307 0.051112 0.001581 -> 0.947307 
 70 W B 0.692760 0.278149 0.029091 -> 0.692760 
 71 S B 0.789862 0.198967 0.011171 -> 0.789862 
 72 P B 0.411758 0.388286 0.199956 -> 0.411758 
 73 F M 0.208360 0.505308 0.286331 -> 0.505308 
 74 D E 0.056193 0.384437 0.559370 -> 0.559370 
 75 T M 0.123995 0.495988 0.380016 -> 0.495988 
 76 Q E 0.009224 0.141485 0.849291 -> 0.849291 
 77 N E 0.048308 0.450493 0.501200 -> 0.501200 
 78 P M 0.165948 0.444812 0.389241 -> 0.444812 
 79 K E 0.004287 0.071698 0.924016 -> 0.924016 
 80 E E 0.008025 0.142391 0.849583 -> 0.849583 
 81 I M 0.450379 0.491886 0.057735 -> 0.491886 
 82 P E 0.023182 0.265121 0.711697 -> 0.711697 
 83 D E 0.008826 0.095746 0.895428 -> 0.895428 
 84 D E 0.030182 0.245019 0.724799 -> 0.724799 
 85 Q M 0.087396 0.502060 0.410544 -> 0.502060 
 86 K M 0.079975 0.533779 0.386246 -> 0.533779 
 87 I B 0.845850 0.145359 0.008791 -> 0.845850 
 88 K M 0.069620 0.608513 0.321867 -> 0.608513 
 89 L B 0.716100 0.240805 0.043095 -> 0.716100 
 90 L B 0.486312 0.432538 0.081150 -> 0.486312 
 91 R M 0.085408 0.494751 0.419840 -> 0.494751 
 92 Q E 0.034509 0.278262 0.687229 -> 0.687229 
 93 G M 0.294342 0.428500 0.277158 -> 0.428500 
 94 K E 0.008849 0.096270 0.894881 -> 0.894881 
 95 D E 0.031881 0.260452 0.707667 -> 0.707667 
 96 V B 0.625239 0.351516 0.023245 -> 0.625239 
 97 H E 0.040984 0.469606 0.489411 -> 0.489411 
 98 I M 0.403637 0.496883 0.099480 -> 0.496883 
 99 G M 0.295155 0.493702 0.211143 -> 0.493702 
 100 E E 0.019023 0.255886 0.725092 -> 0.725092 
 101 F B 0.531218 0.373455 0.095327 -> 0.531218 
 102 G M 0.305639 0.385779 0.308582 -> 0.385779 
 103 N E 0.162580 0.315114 0.522306 -> 0.522306 
 104 E M 0.345106 0.348565 0.306329 -> 0.348565 
 105 G B 0.398445 0.297668 0.303886 -> 0.398445 
 106 S M 0.344595 0.359339 0.296065 -> 0.359339 
 107 G B 0.473403 0.294376 0.232221 -> 0.473403 
 108 G B 0.587244 0.319089 0.093666 -> 0.587244 
 109 Q M 0.301472 0.480793 0.217735 -> 0.480793 
 110 S B 0.761367 0.212704 0.025929 -> 0.761367 
 111 Y M 0.107811 0.553745 0.338444 -> 0.553745 
 112 L M 0.326817 0.538544 0.134640 -> 0.538544 
 113 K E 0.011052 0.205280 0.783669 -> 0.783669 
 114 Y M 0.329086 0.584817 0.086097 -> 0.584817 
 115 P E 0.118227 0.341555 0.540218 -> 0.540218 
 116 W B 0.659950 0.317318 0.022732 -> 0.659950 
 117 K E 0.026498 0.316760 0.656743 -> 0.656743 
 118 A E 0.135353 0.340000 0.524647 -> 0.524647 
 119 G E 0.048258 0.183352 0.768390 -> 0.768390 
 120 N M 0.202048 0.637435 0.160517 -> 0.637435 
 121 T M 0.189007 0.532069 0.278924 -> 0.532069 
 122 Y B 0.725103 0.264807 0.010090 -> 0.725103 
 123 K M 0.128639 0.690282 0.181080 -> 0.690282 
 124 F B 0.953603 0.042198 0.004199 -> 0.953603 
 125 L B 0.595286 0.374555 0.030159 -> 0.595286 
 126 M B 0.966587 0.029876 0.003537 -> 0.966587 
 127 Q M 0.241505 0.671075 0.087420 -> 0.671075 
 128 I B 0.842219 0.148361 0.009421 -> 0.842219 
 129 R M 0.053839 0.648906 0.297255 -> 0.648906 
 130 P M 0.256955 0.478900 0.264145 -> 0.478900 
 131 D E 0.007406 0.105199 0.887394 -> 0.887394 
 132 G E 0.036188 0.223113 0.740699 -> 0.740699 
 133 N E 0.021527 0.139320 0.839154 -> 0.839154 
 134 G E 0.123674 0.257081 0.619245 -> 0.619245 
 135 N M 0.141186 0.651168 0.207646 -> 0.651168 
 136 T B 0.700051 0.259423 0.040525 -> 0.700051 
 137 T M 0.401306 0.546313 0.052381 -> 0.546313 
 138 Y B 0.840061 0.154914 0.005025 -> 0.840061 
 139 T B 0.847035 0.144967 0.007998 -> 0.847035 
 140 A B 0.968721 0.028356 0.002923 -> 0.968721 
 141 Y B 0.702559 0.278321 0.019121 -> 0.702559 
 142 F B 0.972957 0.025858 0.001184 -> 0.972957 
 143 Y M 0.214781 0.702546 0.082673 -> 0.702546 
 144 A B 0.809734 0.177563 0.012703 -> 0.809734 
 145 T M 0.070412 0.599493 0.330095 -> 0.599493 
 146 D E 0.013924 0.199624 0.786452 -> 0.786452 
 147 E E 0.010438 0.160752 0.828810 -> 0.828810 
 148 K E 0.007829 0.127159 0.865012 -> 0.865012 
 149 E E 0.024465 0.385393 0.590141 -> 0.590141 
 150 W B 0.558982 0.412334 0.028684 -> 0.558982 
 151 K M 0.057256 0.646157 0.296586 -> 0.646157 
 152 L B 0.804895 0.185665 0.009440 -> 0.804895 
 153 I B 0.887823 0.108715 0.003462 -> 0.887823 
 154 A B 0.950484 0.045412 0.004104 -> 0.950484 
 155 S B 0.716170 0.260152 0.023679 -> 0.716170 
 156 F B 0.778679 0.202266 0.019055 -> 0.778679 
 157 L M 0.176093 0.548031 0.275876 -> 0.548031 
 158 R M 0.242200 0.607250 0.150550 -> 0.607250 
 159 P M 0.266986 0.433803 0.299211 -> 0.433803 
 160 K E 0.007696 0.160884 0.831420 -> 0.831420 
 161 T E 0.070431 0.228630 0.700939 -> 0.700939 
 162 N E 0.082929 0.323907 0.593164 -> 0.593164 
 163 T E 0.079178 0.407801 0.513022 -> 0.513022 
 164 W M 0.177484 0.500278 0.322238 -> 0.500278 
 165 Y B 0.543867 0.414890 0.041243 -> 0.543867 
 166 K E 0.031429 0.258209 0.710361 -> 0.710361 
 167 R M 0.148060 0.622571 0.229369 -> 0.622571 
 168 P B 0.591842 0.269702 0.138456 -> 0.591842 
 169 H B 0.593016 0.344660 0.062324 -> 0.593016 
 170 S B 0.910644 0.078055 0.011301 -> 0.910644 
 171 F B 0.859833 0.124793 0.015374 -> 0.859833 
 172 L B 0.836023 0.151190 0.012787 -> 0.836023 
 173 E B 0.781663 0.195791 0.022546 -> 0.781663 
 174 N M 0.317633 0.561353 0.121015 -> 0.561353 
 175 F B 0.650670 0.323083 0.026247 -> 0.650670 
 176 S M 0.220569 0.573850 0.205582 -> 0.573850 
 177 P E 0.147527 0.409784 0.442689 -> 0.442689 
 178 E E 0.015389 0.089381 0.895230 -> 0.895230 
 179 Q E 0.038046 0.271762 0.690191 -> 0.690191 
 180 G E 0.321632 0.266335 0.412033 -> 0.412033 
 181 Y E 0.084508 0.410505 0.504986 -> 0.504986 
 182 L M 0.247385 0.508037 0.244578 -> 0.508037 
 183 S E 0.078247 0.377237 0.544516 -> 0.544516 
 184 R M 0.287754 0.564919 0.147327 -> 0.564919 
 185 E M 0.103261 0.526051 0.370688 -> 0.526051 
 186 V B 0.873586 0.114930 0.011484 -> 0.873586 
 187 F M 0.282922 0.593292 0.123787 -> 0.593292 
 188 F B 0.773212 0.201971 0.024817 -> 0.773212 
 189 G M 0.253166 0.488135 0.258699 -> 0.488135 
 190 N M 0.349670 0.428155 0.222175 -> 0.428155 
 191 Q B 0.689906 0.249174 0.060919 -> 0.689906 
 192 W M 0.463808 0.479217 0.056976 -> 0.479217 
 193 A B 0.741782 0.215181 0.043037 -> 0.741782 
 194 R M 0.195083 0.616194 0.188722 -> 0.616194 
 195 S M 0.423201 0.471792 0.105007 -> 0.471792 
 196 K E 0.005128 0.103992 0.890880 -> 0.890880 
 197 E E 0.002588 0.050929 0.946483 -> 0.946483 
 198 G E 0.042524 0.269017 0.688459 -> 0.688459 
 199 K E 0.004506 0.118772 0.876722 -> 0.876722 
 200 W M 0.287220 0.609744 0.103036 -> 0.609744 
 201 S M 0.145114 0.620882 0.234004 -> 0.620882 
 202 R E 0.004706 0.132990 0.862304 -> 0.862304 
 203 L M 0.377274 0.559824 0.062902 -> 0.559824 
 204 T M 0.068336 0.554769 0.376896 -> 0.554769 
 205 D E 0.030892 0.348290 0.620817 -> 0.620817 
 206 A B 0.773469 0.213468 0.013064 -> 0.773469 
 207 T M 0.080976 0.606824 0.312199 -> 0.606824 
 208 F B 0.805689 0.176868 0.017443 -> 0.805689 
 209 T M 0.094015 0.485635 0.420350 -> 0.485635 
 210 H M 0.344582 0.432024 0.223394 -> 0.432024 
 211 D M 0.106977 0.486011 0.407012 -> 0.486011 
 212 A E 0.239114 0.297127 0.463760 -> 0.463760 
 213 T E 0.011976 0.160625 0.827398 -> 0.827398 
 214 A E 0.099302 0.216252 0.684446 -> 0.684446 
 215 S E 0.020356 0.114183 0.865462 -> 0.865462 
 216 A E 0.106796 0.339936 0.553268 -> 0.553268 
 217 Q E 0.026168 0.254540 0.719292 -> 0.719292 
 218 V M 0.423512 0.456195 0.120293 -> 0.456195 
 219 R M 0.245058 0.596994 0.157948 -> 0.596994 
 220 L B 0.756713 0.221245 0.022042 -> 0.756713 
 221 D B 0.543940 0.379278 0.076782 -> 0.543940 
 222 Y B 0.658357 0.280741 0.060902 -> 0.658357 
 223 Q M 0.321971 0.359486 0.318543 -> 0.359486 
 224 G E 0.344762 0.307629 0.347609 -> 0.347609 
 225 G M 0.316909 0.361453 0.321638 -> 0.361453 
 226 N E 0.331268 0.331590 0.337141 -> 0.337141 
 227 T E 0.170113 0.410102 0.419785 -> 0.419785 
 228 K E 0.015720 0.203381 0.780899 -> 0.780899 
 229 D E 0.062042 0.317762 0.620196 -> 0.620196 
 230 N M 0.121079 0.464961 0.413960 -> 0.464961 
 231 R M 0.191618 0.669786 0.138596 -> 0.669786 
 232 F B 0.839536 0.143419 0.017045 -> 0.839536 
 233 Y B 0.584504 0.385291 0.030205 -> 0.584504 
 234 L B 0.923794 0.071524 0.004681 -> 0.923794 
 235 K M 0.185738 0.584328 0.229934 -> 0.584328 
 236 M B 0.389170 0.376625 0.234205 -> 0.389170 
 237 G B 0.593328 0.272454 0.134218 -> 0.593328 
 238 G M 0.338282 0.359926 0.301793 -> 0.359926 
 239 F M 0.280643 0.465359 0.253998 -> 0.465359 
 240 F B 0.459301 0.411866 0.128833 -> 0.459301 
 241 N M 0.134374 0.465546 0.400080 -> 0.465546 
 242 E E 0.011185 0.161058 0.827757 -> 0.827757 
 243 S E 0.052868 0.155347 0.791785 -> 0.791785 
 244 V M 0.471635 0.472316 0.056049 -> 0.472316 
 245 P E 0.034643 0.220759 0.744598 -> 0.744598 
 246 M E 0.071706 0.350155 0.578139 -> 0.578139 
 247 G E 0.031555 0.185760 0.782685 -> 0.782685 
 248 T M 0.090174 0.513383 0.396443 -> 0.513383 
 249 K E 0.008685 0.216383 0.774932 -> 0.774932 
 250 F B 0.571399 0.401678 0.026923 -> 0.571399 
 251 Y E 0.022679 0.332273 0.645048 -> 0.645048 
 252 C M 0.421924 0.508176 0.069900 -> 0.508176 
 253 K E 0.006113 0.199831 0.794056 -> 0.794056 
 254 P E 0.070358 0.364837 0.564805 -> 0.564805 
 255 T E 0.014585 0.083036 0.902379 -> 0.902379 
 256 G E 0.031786 0.281180 0.687035 -> 0.687035 
 257 K E 0.003064 0.082972 0.913964 -> 0.913964 
 258 E E 0.017190 0.222514 0.760296 -> 0.760296 
 259 P M 0.212621 0.526809 0.260570 -> 0.526809 
 260 E E 0.012814 0.247394 0.739791 -> 0.739791 
 261 I B 0.590359 0.382559 0.027081 -> 0.590359 
 262 D M 0.042491 0.479087 0.478422 -> 0.479087 
 263 W B 0.583194 0.391235 0.025571 -> 0.583194 
 264 E E 0.002989 0.087023 0.909989 -> 0.909989 
 265 A E 0.037234 0.352979 0.609787 -> 0.609787 
 266 L B 0.488256 0.450475 0.061269 -> 0.488256 
 267 K E 0.004275 0.158364 0.837361 -> 0.837361 
 268 Q E 0.003361 0.065031 0.931609 -> 0.931609 
 269 L E 0.035700 0.335055 0.629245 -> 0.629245 
