# Supplementary material for: AcconPred: Predicting Solvent Accessibility and Contact Number Simultaneously by a Multitask Learning Framework under the Conditional Neural Fields Model
Source: Biomed Res Int. 2015 Aug 3;2015:678764. doi: 10.1155/2015/678764 (PMC4538422; doi:10.1155/2015/678764)
Supplement: Supplementary file 1 — Training/testing dataset as well as the CASP11 evaluation dataset could be found in the Supplementary Material. The CASP11 evaluation dataset contains all detailed results from SPINE-X, SANN, ACCpro5 and AcconPred. [file 678764.f1.zip › Supplmentary_Files/105_casp11_domain/casp11_domain_AcconPred/T0810-D1.reso]

# AcconPred: three-state solvent accessibility prediction results 
# probabilities are in the order of B (Bury, pACC: 0-10), M (Medium, pACC: 11-40) and E (Exposed, pACC: 41-100), 
# where pACC is the relative solvent accessibility value calculated by DSSP 
# output format: <position> <one letter amino acid> <predicted label> ... <probabilities> ... -> <maximal probability> 

 1 S E 0.012638 0.056494 0.930867 -> 0.930867 
 2 Q E 0.010878 0.099889 0.889233 -> 0.889233 
 3 I E 0.061714 0.316779 0.621507 -> 0.621507 
 4 G E 0.079927 0.342319 0.577754 -> 0.577754 
 5 S E 0.038046 0.240929 0.721025 -> 0.721025 
 6 S E 0.086878 0.350221 0.562901 -> 0.562901 
 7 V B 0.589263 0.338599 0.072138 -> 0.589263 
 8 R E 0.031890 0.420518 0.547592 -> 0.547592 
 9 Q E 0.016669 0.207634 0.775697 -> 0.775697 
 10 A B 0.461917 0.393821 0.144262 -> 0.461917 
 11 V B 0.601853 0.335929 0.062217 -> 0.601853 
 12 S E 0.047494 0.290247 0.662259 -> 0.662259 
 13 D E 0.009404 0.112946 0.877651 -> 0.877651 
 14 N E 0.030733 0.272960 0.696308 -> 0.696308 
 15 Q E 0.030056 0.253691 0.716253 -> 0.716253 
 16 S E 0.161236 0.383299 0.455465 -> 0.455465 
 17 A B 0.493379 0.303890 0.202731 -> 0.493379 
 18 Q E 0.042718 0.320555 0.636726 -> 0.636726 
 19 T M 0.200776 0.516252 0.282972 -> 0.516252 
 20 L B 0.633437 0.298911 0.067651 -> 0.633437 
 21 V M 0.397980 0.428507 0.173513 -> 0.428507 
 22 E E 0.045202 0.359398 0.595400 -> 0.595400 
 23 W B 0.524106 0.417538 0.058356 -> 0.524106 
 24 E E 0.044470 0.380203 0.575327 -> 0.575327 
 25 N E 0.038525 0.308229 0.653246 -> 0.653246 
 26 S E 0.071193 0.313076 0.615730 -> 0.615730 
 27 E E 0.014975 0.152957 0.832068 -> 0.832068 
 28 A E 0.120959 0.342670 0.536371 -> 0.536371 
 29 N E 0.064291 0.447434 0.488275 -> 0.488275 
 30 P M 0.240563 0.464646 0.294791 -> 0.464646 
 31 E E 0.011966 0.192584 0.795450 -> 0.795450 
 32 A E 0.157854 0.409909 0.432237 -> 0.432237 
 33 L B 0.577809 0.364726 0.057465 -> 0.577809 
 34 F B 0.647588 0.292762 0.059650 -> 0.647588 
 35 A E 0.059399 0.176206 0.764395 -> 0.764395 
 36 N E 0.062336 0.403851 0.533814 -> 0.533814 
 37 W B 0.690184 0.288996 0.020820 -> 0.690184 
 38 R M 0.083767 0.516513 0.399720 -> 0.516513 
 39 H E 0.061094 0.297221 0.641686 -> 0.641686 
 40 E M 0.100925 0.460104 0.438971 -> 0.460104 
 41 F B 0.680224 0.271242 0.048534 -> 0.680224 
 42 M M 0.337605 0.407775 0.254620 -> 0.407775 
 43 V B 0.416507 0.391499 0.191994 -> 0.416507 
 44 D E 0.070587 0.398113 0.531300 -> 0.531300 
 45 S E 0.134677 0.426980 0.438344 -> 0.438344 
 46 S E 0.092503 0.282260 0.625237 -> 0.625237 
 47 K E 0.018585 0.250449 0.730966 -> 0.730966 
 48 R E 0.044735 0.382091 0.573175 -> 0.573175 
 49 E E 0.013625 0.171789 0.814586 -> 0.814586 
 50 S E 0.048568 0.282393 0.669038 -> 0.669038 
 51 M B 0.502829 0.418031 0.079140 -> 0.502829 
 52 K M 0.049030 0.534598 0.416372 -> 0.534598 
 53 T E 0.030948 0.362984 0.606068 -> 0.606068 
 54 E E 0.008438 0.207734 0.783827 -> 0.783827 
 55 L B 0.821974 0.168835 0.009190 -> 0.821974 
 56 C B 0.685379 0.294205 0.020415 -> 0.685379 
 57 K E 0.001437 0.093168 0.905395 -> 0.905395 
 58 E E 0.016767 0.387670 0.595564 -> 0.595564 
 59 L B 0.752676 0.233422 0.013902 -> 0.752676 
 60 Q E 0.004284 0.168883 0.826833 -> 0.826833 
 61 A E 0.017438 0.117281 0.865282 -> 0.865282 
 62 L M 0.442859 0.516000 0.041141 -> 0.516000 
 63 P E 0.046013 0.294268 0.659719 -> 0.659719 
 64 A E 0.115040 0.316224 0.568736 -> 0.568736 
 65 Q E 0.012926 0.201704 0.785370 -> 0.785370 
 66 D E 0.036629 0.332324 0.631047 -> 0.631047 
 67 L B 0.614673 0.359897 0.025430 -> 0.614673 
 68 T E 0.075351 0.363955 0.560694 -> 0.560694 
 69 L M 0.330583 0.492617 0.176800 -> 0.492617 
 70 F B 0.623959 0.330936 0.045104 -> 0.623959 
 71 E M 0.053371 0.558500 0.388128 -> 0.558500 
 72 N E 0.024118 0.222795 0.753087 -> 0.753087 
 73 E E 0.038925 0.410026 0.551050 -> 0.551050 
 74 I B 0.610055 0.342172 0.047773 -> 0.610055 
 75 R E 0.020962 0.371643 0.607395 -> 0.607395 
 76 D E 0.017902 0.219243 0.762855 -> 0.762855 
 77 E E 0.015192 0.151550 0.833258 -> 0.833258 
 78 N E 0.082529 0.379555 0.537916 -> 0.537916 
 79 N M 0.145961 0.487582 0.366457 -> 0.487582 
 80 R E 0.049651 0.390097 0.560252 -> 0.560252 
 81 A B 0.365543 0.329035 0.305422 -> 0.365543 
 82 L M 0.373745 0.426733 0.199522 -> 0.426733 
 83 V B 0.444026 0.401936 0.154038 -> 0.444026 
 84 S E 0.039920 0.189543 0.770537 -> 0.770537 
 85 G E 0.069137 0.282182 0.648681 -> 0.648681 
 86 C B 0.610165 0.343152 0.046683 -> 0.610165 
 87 K E 0.036577 0.419547 0.543876 -> 0.543876 
 88 E E 0.005628 0.109481 0.884891 -> 0.884891 
 89 E E 0.019718 0.354994 0.625288 -> 0.625288 
 90 L B 0.742487 0.230623 0.026890 -> 0.742487 
 91 L M 0.439224 0.478429 0.082348 -> 0.478429 
 92 A E 0.034367 0.212793 0.752841 -> 0.752841 
 93 Q E 0.022201 0.446524 0.531275 -> 0.531275 
 94 V B 0.899656 0.088890 0.011454 -> 0.899656 
 95 D M 0.061307 0.666333 0.272360 -> 0.666333 
 96 E E 0.001439 0.072546 0.926015 -> 0.926015 
 97 H M 0.048035 0.487898 0.464067 -> 0.487898 
 98 F B 0.604202 0.379458 0.016340 -> 0.604202 
 99 D E 0.005086 0.217848 0.777066 -> 0.777066 
 100 E E 0.002024 0.073420 0.924556 -> 0.924556 
 101 Q M 0.084513 0.458409 0.457079 -> 0.458409 
 102 R E 0.043341 0.469011 0.487648 -> 0.487648 
 103 E E 0.002252 0.073192 0.924556 -> 0.924556 
 104 S E 0.041518 0.233628 0.724854 -> 0.724854 
 105 M M 0.345880 0.546656 0.107464 -> 0.546656 
 106 S E 0.037287 0.182906 0.779807 -> 0.779807 
 107 V M 0.294013 0.511851 0.194136 -> 0.511851 
 108 P E 0.044469 0.267567 0.687964 -> 0.687964 
 109 G E 0.084037 0.248308 0.667656 -> 0.667656 
 110 H E 0.023677 0.173758 0.802565 -> 0.802565 
 111 A E 0.046993 0.226643 0.726363 -> 0.726363 
 112 L M 0.168555 0.557204 0.274241 -> 0.557204 
 113 K E 0.006197 0.060952 0.932851 -> 0.932851 
