# Supplementary material for: AcconPred: Predicting Solvent Accessibility and Contact Number Simultaneously by a Multitask Learning Framework under the Conditional Neural Fields Model
Source: Biomed Res Int. 2015 Aug 3;2015:678764. doi: 10.1155/2015/678764 (PMC4538422; doi:10.1155/2015/678764)
Supplement: Supplementary file 1 — Training/testing dataset as well as the CASP11 evaluation dataset could be found in the Supplementary Material. The CASP11 evaluation dataset contains all detailed results from SPINE-X, SANN, ACCpro5 and AcconPred. [file 678764.f1.zip › Supplmentary_Files/105_casp11_domain/casp11_domain_AcconPred/T0810-D2.reso]

# AcconPred: three-state solvent accessibility prediction results 
# probabilities are in the order of B (Bury, pACC: 0-10), M (Medium, pACC: 11-40) and E (Exposed, pACC: 41-100), 
# where pACC is the relative solvent accessibility value calculated by DSSP 
# output format: <position> <one letter amino acid> <predicted label> ... <probabilities> ... -> <maximal probability> 

 1 A E 0.002435 0.024484 0.973081 -> 0.973081 
 2 V E 0.029665 0.329153 0.641183 -> 0.641183 
 3 Q E 0.010317 0.128982 0.860700 -> 0.860700 
 4 S E 0.067574 0.241663 0.690763 -> 0.690763 
 5 R E 0.031743 0.277277 0.690980 -> 0.690980 
 6 N E 0.007828 0.140530 0.851642 -> 0.851642 
 7 S E 0.213520 0.369459 0.417021 -> 0.417021 
 8 F M 0.237110 0.533804 0.229085 -> 0.533804 
 9 R E 0.031990 0.295912 0.672098 -> 0.672098 
 10 F B 0.479323 0.453166 0.067511 -> 0.479323 
 11 P E 0.103598 0.400644 0.495758 -> 0.495758 
 12 D E 0.044076 0.280122 0.675802 -> 0.675802 
 13 N E 0.062601 0.245643 0.691756 -> 0.691756 
 14 T M 0.158745 0.430463 0.410791 -> 0.430463 
 15 Q E 0.035077 0.225947 0.738976 -> 0.738976 
 16 K E 0.025010 0.239565 0.735426 -> 0.735426 
 17 R E 0.026264 0.315987 0.657749 -> 0.657749 
 18 D E 0.041135 0.202748 0.756117 -> 0.756117 
 19 M M 0.208378 0.532393 0.259229 -> 0.532393 
 20 S E 0.192942 0.371599 0.435459 -> 0.435459 
 21 N E 0.019160 0.143840 0.837000 -> 0.837000 
 22 G E 0.082341 0.273149 0.644510 -> 0.644510 
 23 Y M 0.124758 0.502346 0.372897 -> 0.502346 
 24 M M 0.315495 0.405091 0.279414 -> 0.405091 
 25 A B 0.415550 0.404771 0.179678 -> 0.415550 
 26 V M 0.323110 0.507552 0.169339 -> 0.507552 
 27 R M 0.092644 0.484626 0.422730 -> 0.484626 
 28 G M 0.234852 0.399045 0.366103 -> 0.399045 
 29 D E 0.042260 0.284508 0.673233 -> 0.673233 
 30 V M 0.260142 0.506449 0.233409 -> 0.506449 
 31 A E 0.040486 0.207380 0.752133 -> 0.752133 
 32 R E 0.008805 0.198466 0.792729 -> 0.792729 
 33 K M 0.149251 0.583060 0.267689 -> 0.583060 
 34 E M 0.251882 0.682305 0.065814 -> 0.682305 
 35 V B 0.991267 0.008340 0.000393 -> 0.991267 
 36 V B 0.924665 0.074188 0.001148 -> 0.924665 
 37 L B 0.996209 0.003486 0.000305 -> 0.996209 
 38 T B 0.876097 0.119550 0.004352 -> 0.876097 
 39 F B 0.978460 0.020325 0.001215 -> 0.978460 
 40 D B 0.713951 0.261158 0.024891 -> 0.713951 
 41 D B 0.807891 0.175877 0.016232 -> 0.807891 
 42 G B 0.772934 0.192498 0.034568 -> 0.772934 
 43 P B 0.529703 0.345308 0.124990 -> 0.529703 
 44 H M 0.225297 0.522377 0.252327 -> 0.522377 
 45 G E 0.126169 0.332665 0.541166 -> 0.541166 
 46 L E 0.111460 0.261981 0.626559 -> 0.626559 
 47 Y M 0.332079 0.609841 0.058079 -> 0.609841 
 48 T B 0.857122 0.135662 0.007217 -> 0.857122 
 49 D E 0.016704 0.347995 0.635302 -> 0.635302 
 50 A M 0.156323 0.671446 0.172231 -> 0.671446 
 51 I B 0.990808 0.007540 0.001652 -> 0.990808 
 52 L B 0.892828 0.104859 0.002313 -> 0.892828 
 53 R E 0.007918 0.300297 0.691785 -> 0.691785 
 54 A B 0.595580 0.391751 0.012669 -> 0.595580 
 55 L B 0.982334 0.015175 0.002491 -> 0.982334 
 56 K E 0.003128 0.122080 0.874792 -> 0.874792 
 57 E E 0.001218 0.045431 0.953350 -> 0.953350 
 58 V M 0.235917 0.726715 0.037367 -> 0.726715 
 59 N E 0.005730 0.130060 0.864210 -> 0.864210 
 60 A B 0.930936 0.065688 0.003376 -> 0.930936 
 61 K E 0.010839 0.398457 0.590704 -> 0.590704 
 62 A B 0.907747 0.090527 0.001726 -> 0.907747 
 63 M B 0.785086 0.211168 0.003747 -> 0.785086 
 64 F B 0.964857 0.032420 0.002723 -> 0.964857 
 65 F B 0.958097 0.036608 0.005295 -> 0.958097 
 66 A B 0.946749 0.049326 0.003926 -> 0.946749 
 67 T B 0.637619 0.321056 0.041326 -> 0.637619 
 68 G B 0.743331 0.230840 0.025830 -> 0.743331 
 69 K E 0.009865 0.252709 0.737425 -> 0.737425 
 70 S M 0.271313 0.553920 0.174767 -> 0.553920 
 71 V B 0.867306 0.116054 0.016641 -> 0.867306 
 72 R E 0.006018 0.148411 0.845571 -> 0.845571 
 73 T E 0.010531 0.037492 0.951977 -> 0.951977 
 74 N M 0.249000 0.694170 0.056830 -> 0.694170 
 75 P M 0.104668 0.651793 0.243538 -> 0.651793 
 76 E E 0.004065 0.077396 0.918539 -> 0.918539 
 77 A B 0.520026 0.456544 0.023430 -> 0.520026 
 78 L B 0.950061 0.045234 0.004705 -> 0.950061 
 79 K E 0.006894 0.287641 0.705465 -> 0.705465 
 80 R E 0.005664 0.294792 0.699544 -> 0.699544 
 81 V B 0.950139 0.043225 0.006636 -> 0.950139 
 82 A M 0.311516 0.617001 0.071483 -> 0.617001 
 83 A E 0.002168 0.009891 0.987941 -> 0.987941 
 84 D E 0.010666 0.274935 0.714399 -> 0.714399 
 85 G M 0.293373 0.356072 0.350556 -> 0.356072 
 86 H B 0.774561 0.210742 0.014697 -> 0.774561 
 87 V B 0.630443 0.333886 0.035672 -> 0.630443 
 88 I B 0.939607 0.055586 0.004807 -> 0.939607 
 89 G B 0.974312 0.022804 0.002884 -> 0.974312 
 90 S B 0.918173 0.072355 0.009472 -> 0.918173 
 91 H B 0.774715 0.202415 0.022870 -> 0.774715 
 92 S B 0.831187 0.151358 0.017455 -> 0.831187 
 93 I B 0.575262 0.377924 0.046813 -> 0.575262 
 94 T E 0.115438 0.423299 0.461263 -> 0.461263 
 95 L B 0.501764 0.474542 0.023693 -> 0.501764 
 96 T E 0.037862 0.319331 0.642807 -> 0.642807 
 97 F M 0.168461 0.637355 0.194184 -> 0.637355 
 98 D E 0.004431 0.093333 0.902236 -> 0.902236 
 99 E E 0.004794 0.220167 0.775039 -> 0.775039 
 100 A B 0.746898 0.233409 0.019693 -> 0.746898 
 101 A M 0.197046 0.662258 0.140696 -> 0.662258 
 102 A E 0.006110 0.102670 0.891219 -> 0.891219 
 103 E M 0.082719 0.616567 0.300714 -> 0.616567 
 104 V B 0.881703 0.102123 0.016175 -> 0.881703 
 105 R E 0.006790 0.228866 0.764344 -> 0.764344 
 106 G E 0.025881 0.307741 0.666378 -> 0.666378 
 107 G B 0.861106 0.121681 0.017213 -> 0.861106 
 108 H M 0.262091 0.672588 0.065321 -> 0.672588 
 109 Q E 0.009029 0.182095 0.808876 -> 0.808876 
 110 A M 0.451499 0.511156 0.037345 -> 0.511156 
 111 V B 0.997603 0.001323 0.001074 -> 0.997603 
 112 F M 0.187605 0.688182 0.124213 -> 0.688182 
 113 D E 0.005934 0.072495 0.921571 -> 0.921571 
 114 V M 0.389360 0.528303 0.082336 -> 0.528303 
 115 L M 0.443142 0.489349 0.067510 -> 0.489349 
 116 G E 0.027296 0.152060 0.820644 -> 0.820644 
 117 W M 0.060688 0.651646 0.287666 -> 0.651646 
 118 V E 0.045765 0.320096 0.634139 -> 0.634139 
 119 D B 0.574315 0.349277 0.076407 -> 0.574315 
 120 P M 0.272295 0.491986 0.235720 -> 0.491986 
 121 V B 0.759907 0.226422 0.013671 -> 0.759907 
 122 F B 0.871808 0.123507 0.004685 -> 0.871808 
 123 R B 0.778415 0.202804 0.018781 -> 0.778415 
 124 F B 0.907142 0.086406 0.006452 -> 0.907142 
 125 P B 0.786722 0.179325 0.033953 -> 0.786722 
 126 Y M 0.255335 0.497216 0.247449 -> 0.497216 
 127 G B 0.447953 0.378837 0.173210 -> 0.447953 
 128 E E 0.071565 0.339919 0.588516 -> 0.588516 
 129 T M 0.196524 0.518004 0.285472 -> 0.518004 
 130 S M 0.262979 0.602504 0.134517 -> 0.602504 
 131 K E 0.003668 0.052897 0.943435 -> 0.943435 
 132 D E 0.035792 0.427126 0.537082 -> 0.537082 
 133 L B 0.956795 0.034852 0.008353 -> 0.956795 
 134 K M 0.069583 0.758569 0.171848 -> 0.758569 
 135 A E 0.025202 0.283507 0.691291 -> 0.691291 
 136 F B 0.534825 0.458580 0.006594 -> 0.534825 
 137 L B 0.956725 0.036700 0.006575 -> 0.956725 
 138 K E 0.001373 0.079534 0.919093 -> 0.919093 
 139 T E 0.005419 0.095266 0.899315 -> 0.899315 
 140 K M 0.024389 0.593236 0.382374 -> 0.593236 
 141 S E 0.036819 0.217598 0.745583 -> 0.745583 
 142 T B 0.713455 0.268802 0.017743 -> 0.713455 
 143 G M 0.448724 0.473946 0.077330 -> 0.473946 
 144 E B 0.647896 0.319364 0.032740 -> 0.647896 
 145 F B 0.956823 0.041938 0.001239 -> 0.956823 
 146 A B 0.944115 0.051737 0.004147 -> 0.944115 
 147 W B 0.871102 0.122761 0.006137 -> 0.871102 
 148 N B 0.743181 0.229325 0.027494 -> 0.743181 
 149 I B 0.889646 0.099767 0.010587 -> 0.889646 
 150 E M 0.438337 0.456245 0.105417 -> 0.456245 
 151 S B 0.789248 0.194912 0.015840 -> 0.789248 
 152 D E 0.043224 0.406012 0.550764 -> 0.550764 
 153 D B 0.526483 0.383581 0.089936 -> 0.526483 
 154 W B 0.631904 0.294834 0.073261 -> 0.631904 
 155 R E 0.050980 0.300500 0.648519 -> 0.648519 
 156 T E 0.112148 0.401785 0.486068 -> 0.486068 
 157 Q E 0.029915 0.339187 0.630898 -> 0.630898 
 158 S M 0.093907 0.470558 0.435534 -> 0.470558 
 159 N M 0.240232 0.600863 0.158905 -> 0.600863 
 160 E E 0.006544 0.149992 0.843464 -> 0.843464 
 161 Q E 0.013198 0.423797 0.563005 -> 0.563005 
 162 L B 0.931984 0.060260 0.007755 -> 0.931984 
 163 L B 0.702301 0.277811 0.019888 -> 0.702301 
 164 A E 0.030734 0.187009 0.782257 -> 0.782257 
 165 R M 0.042671 0.700614 0.256715 -> 0.700614 
 166 V B 0.945249 0.051979 0.002772 -> 0.945249 
 167 L M 0.204520 0.662802 0.132678 -> 0.662802 
 168 A E 0.013074 0.083960 0.902967 -> 0.902967 
 169 N M 0.045702 0.496592 0.457706 -> 0.496592 
 170 V B 0.604896 0.346460 0.048644 -> 0.604896 
 171 E E 0.013237 0.202323 0.784440 -> 0.784440 
 172 S E 0.037271 0.233271 0.729458 -> 0.729458 
 173 Q E 0.022879 0.346933 0.630188 -> 0.630188 
 174 G E 0.060912 0.321795 0.617293 -> 0.617293 
 175 R M 0.081614 0.598240 0.320146 -> 0.598240 
 176 G B 0.741663 0.245040 0.013297 -> 0.741663 
 177 I B 0.977184 0.022394 0.000422 -> 0.977184 
 178 V B 0.990414 0.009115 0.000471 -> 0.990414 
 179 L B 0.991228 0.007373 0.001399 -> 0.991228 
 180 F B 0.984680 0.014385 0.000936 -> 0.984680 
 181 H B 0.791836 0.195402 0.012762 -> 0.791836 
 182 D B 0.522538 0.374951 0.102511 -> 0.522538 
 183 I M 0.371048 0.397850 0.231102 -> 0.397850 
 184 Q M 0.230337 0.580462 0.189201 -> 0.580462 
 185 R E 0.030289 0.277578 0.692133 -> 0.692133 
 186 R M 0.116751 0.638696 0.244552 -> 0.638696 
 187 T B 0.891816 0.096586 0.011598 -> 0.891816 
 188 A B 0.592032 0.355565 0.052404 -> 0.592032 
 189 E E 0.005105 0.207059 0.787835 -> 0.787835 
 190 I B 0.898273 0.095102 0.006625 -> 0.898273 
 191 M B 0.983985 0.014322 0.001693 -> 0.983985 
 192 P M 0.131933 0.697898 0.170169 -> 0.697898 
 193 Q M 0.024539 0.542674 0.432787 -> 0.542674 
 194 F B 0.963019 0.032140 0.004841 -> 0.963019 
 195 L B 0.966042 0.031061 0.002898 -> 0.966042 
 196 R E 0.002281 0.197343 0.800376 -> 0.800376 
 197 E M 0.058618 0.837247 0.104135 -> 0.837247 
 198 L B 0.988891 0.009318 0.001791 -> 0.988891 
 199 Y M 0.027708 0.656757 0.315535 -> 0.656757 
 200 N E 0.000565 0.012457 0.986978 -> 0.986978 
 201 R E 0.004574 0.270092 0.725335 -> 0.725335 
 202 G E 0.041914 0.274776 0.683310 -> 0.683310 
 203 Y B 0.769763 0.218769 0.011468 -> 0.769763 
 204 S M 0.122562 0.569737 0.307702 -> 0.569737 
 205 V M 0.440184 0.520553 0.039263 -> 0.520553 
 206 V B 0.655706 0.326934 0.017360 -> 0.655706 
 207 L M 0.163075 0.646598 0.190327 -> 0.646598 
 208 L B 0.949725 0.046657 0.003618 -> 0.949725 
 209 T M 0.102492 0.498455 0.399053 -> 0.498455 
 210 A E 0.138233 0.311823 0.549944 -> 0.549944 
 211 A B 0.758707 0.194605 0.046689 -> 0.758707 
 212 D M 0.292451 0.515226 0.192323 -> 0.515226 
 213 P E 0.025990 0.145478 0.828532 -> 0.828532 
 214 S E 0.036515 0.261804 0.701681 -> 0.701681 
 215 A E 0.067821 0.320126 0.612053 -> 0.612053 
 216 K E 0.005191 0.090323 0.904487 -> 0.904487 
 217 Y M 0.319177 0.629834 0.050989 -> 0.629834 
 218 N E 0.060682 0.350377 0.588941 -> 0.588941 
 219 S E 0.092814 0.380990 0.526196 -> 0.526196 
 220 K E 0.005082 0.100536 0.894382 -> 0.894382 
 221 L M 0.258759 0.519883 0.221358 -> 0.519883 
 222 V M 0.186666 0.444938 0.368396 -> 0.444938 
 223 K E 0.004841 0.104337 0.890823 -> 0.890823 
 224 R E 0.015675 0.208226 0.776100 -> 0.776100 
 225 K E 0.004858 0.057112 0.938031 -> 0.938031 
