# Supplementary material for: AcconPred: Predicting Solvent Accessibility and Contact Number Simultaneously by a Multitask Learning Framework under the Conditional Neural Fields Model
Source: Biomed Res Int. 2015 Aug 3;2015:678764. doi: 10.1155/2015/678764 (PMC4538422; doi:10.1155/2015/678764)
Supplement: Supplementary file 1 — Training/testing dataset as well as the CASP11 evaluation dataset could be found in the Supplementary Material. The CASP11 evaluation dataset contains all detailed results from SPINE-X, SANN, ACCpro5 and AcconPred. [file 678764.f1.zip › Supplmentary_Files/105_casp11_domain/casp11_domain_AcconPred/T0811-D1.reso]

# AcconPred: three-state solvent accessibility prediction results 
# probabilities are in the order of B (Bury, pACC: 0-10), M (Medium, pACC: 11-40) and E (Exposed, pACC: 41-100), 
# where pACC is the relative solvent accessibility value calculated by DSSP 
# output format: <position> <one letter amino acid> <predicted label> ... <probabilities> ... -> <maximal probability> 

 1 G E 0.011590 0.098847 0.889563 -> 0.889563 
 2 L B 0.730812 0.256533 0.012655 -> 0.730812 
 3 W B 0.625766 0.351841 0.022393 -> 0.625766 
 4 V B 0.875618 0.115592 0.008790 -> 0.875618 
 5 G B 0.943993 0.050602 0.005405 -> 0.943993 
 6 T B 0.936491 0.053964 0.009545 -> 0.936491 
 7 S B 0.867299 0.124624 0.008077 -> 0.867299 
 8 W B 0.694380 0.284834 0.020785 -> 0.694380 
 9 K M 0.384534 0.496154 0.119311 -> 0.496154 
 10 M B 0.696731 0.243943 0.059326 -> 0.696731 
 11 N B 0.494605 0.418549 0.086846 -> 0.494605 
 12 K E 0.065081 0.403513 0.531406 -> 0.531406 
 13 T M 0.095542 0.539304 0.365154 -> 0.539304 
 14 L M 0.189305 0.669523 0.141172 -> 0.669523 
 15 A E 0.027006 0.103605 0.869390 -> 0.869390 
 16 E M 0.036383 0.609783 0.353834 -> 0.609783 
 17 A B 0.985867 0.010961 0.003171 -> 0.985867 
 18 M M 0.081995 0.671349 0.246656 -> 0.671349 
 19 V E 0.020789 0.174082 0.805129 -> 0.805129 
 20 F B 0.695470 0.298233 0.006296 -> 0.695470 
 21 A B 0.932245 0.063005 0.004751 -> 0.932245 
 22 D E 0.009513 0.200841 0.789646 -> 0.789646 
 23 G M 0.227621 0.540895 0.231483 -> 0.540895 
 24 L B 0.896745 0.092288 0.010966 -> 0.896745 
 25 A M 0.090349 0.527836 0.381816 -> 0.527836 
 26 A E 0.008751 0.073956 0.917293 -> 0.917293 
 27 A M 0.268642 0.499959 0.231400 -> 0.499959 
 28 D E 0.044463 0.392429 0.563108 -> 0.563108 
 29 D E 0.011963 0.176941 0.811096 -> 0.811096 
 30 A E 0.124372 0.211404 0.664224 -> 0.664224 
 31 R M 0.057887 0.510043 0.432071 -> 0.510043 
 32 D E 0.042987 0.425341 0.531672 -> 0.531672 
 33 Q E 0.039103 0.256834 0.704063 -> 0.704063 
 34 R E 0.054213 0.350094 0.595693 -> 0.595693 
 35 I B 0.741257 0.245202 0.013541 -> 0.741257 
 36 Q M 0.186234 0.676838 0.136928 -> 0.676838 
 37 R B 0.492141 0.487472 0.020387 -> 0.492141 
 38 F B 0.962784 0.036747 0.000469 -> 0.962784 
 39 V B 0.975426 0.021715 0.002859 -> 0.975426 
 40 I B 0.966084 0.032606 0.001310 -> 0.966084 
 41 P B 0.946395 0.049545 0.004060 -> 0.946395 
 42 P B 0.662202 0.274030 0.063768 -> 0.662202 
 43 F B 0.608757 0.332127 0.059116 -> 0.608757 
 44 T B 0.591879 0.288625 0.119496 -> 0.591879 
 45 A B 0.708805 0.253556 0.037640 -> 0.708805 
 46 A B 0.888437 0.102691 0.008872 -> 0.888437 
 47 R E 0.029580 0.446086 0.524333 -> 0.524333 
 48 Q M 0.119587 0.623515 0.256899 -> 0.623515 
 49 V B 0.978195 0.018663 0.003142 -> 0.978195 
 50 K M 0.090301 0.694826 0.214873 -> 0.694826 
 51 E E 0.010087 0.130215 0.859698 -> 0.859698 
 52 R M 0.043789 0.572222 0.383989 -> 0.572222 
 53 L B 0.610725 0.358140 0.031135 -> 0.610725 
 54 K E 0.002066 0.085153 0.912781 -> 0.912781 
 55 A E 0.019075 0.160898 0.820027 -> 0.820027 
 56 T M 0.090725 0.542424 0.366851 -> 0.542424 
 57 S E 0.045573 0.365811 0.588615 -> 0.588615 
 58 V B 0.870397 0.126336 0.003267 -> 0.870397 
 59 K M 0.031333 0.663709 0.304959 -> 0.663709 
 60 V B 0.955450 0.042996 0.001554 -> 0.955450 
 61 G B 0.958544 0.040115 0.001341 -> 0.958544 
 62 A B 0.978606 0.018753 0.002642 -> 0.978606 
 63 Q B 0.833071 0.147187 0.019742 -> 0.833071 
 64 N B 0.505400 0.435897 0.058703 -> 0.505400 
 65 M B 0.836225 0.140989 0.022787 -> 0.836225 
 66 H M 0.339827 0.549159 0.111014 -> 0.549159 
 67 W M 0.201386 0.569021 0.229593 -> 0.569021 
 68 D E 0.071369 0.427567 0.501064 -> 0.501064 
 69 D E 0.037709 0.266396 0.695895 -> 0.695895 
 70 A E 0.064746 0.321877 0.613377 -> 0.613377 
 71 G B 0.457379 0.335550 0.207071 -> 0.457379 
 72 A B 0.575630 0.273586 0.150785 -> 0.575630 
 73 W B 0.691277 0.277719 0.031004 -> 0.691277 
 74 T B 0.758878 0.202300 0.038822 -> 0.758878 
 75 G B 0.731285 0.201567 0.067148 -> 0.731285 
 76 E B 0.488708 0.422704 0.088588 -> 0.488708 
 77 I B 0.768124 0.211216 0.020661 -> 0.768124 
 78 S B 0.747817 0.234158 0.018025 -> 0.747817 
 79 P B 0.724574 0.249520 0.025906 -> 0.724574 
 80 V E 0.115981 0.402988 0.481031 -> 0.481031 
 81 M B 0.667225 0.302106 0.030669 -> 0.667225 
 82 L B 0.979367 0.017922 0.002711 -> 0.979367 
 83 S M 0.043837 0.549887 0.406277 -> 0.549887 
 84 D E 0.024030 0.338392 0.637578 -> 0.637578 
 85 C M 0.488061 0.495851 0.016088 -> 0.495851 
 86 D E 0.004138 0.148839 0.847023 -> 0.847023 
 87 L B 0.883732 0.114368 0.001899 -> 0.883732 
 88 D M 0.028106 0.496609 0.475285 -> 0.496609 
 89 I M 0.479475 0.493352 0.027173 -> 0.493352 
 90 V B 0.894249 0.099885 0.005866 -> 0.894249 
 91 E B 0.800064 0.188381 0.011556 -> 0.800064 
 92 L B 0.990809 0.008360 0.000831 -> 0.990809 
 93 G B 0.776566 0.194386 0.029047 -> 0.776566 
 94 H B 0.648762 0.318430 0.032808 -> 0.648762 
 95 S B 0.605949 0.298054 0.095998 -> 0.605949 
 96 E B 0.665363 0.256575 0.078061 -> 0.665363 
 97 R B 0.664794 0.266151 0.069056 -> 0.664794 
 98 R B 0.513459 0.372612 0.113928 -> 0.513459 
 99 E E 0.051961 0.412954 0.535085 -> 0.535085 
 100 H M 0.272451 0.559496 0.168053 -> 0.559496 
 101 F B 0.452867 0.445301 0.101832 -> 0.452867 
 102 G E 0.126571 0.316940 0.556488 -> 0.556488 
 103 E M 0.400961 0.460191 0.138848 -> 0.460191 
 104 T E 0.041581 0.294196 0.664223 -> 0.664223 
 105 D M 0.090317 0.609377 0.300306 -> 0.609377 
 106 R E 0.007051 0.070072 0.922877 -> 0.922877 
 107 T M 0.092438 0.561184 0.346378 -> 0.561184 
 108 V B 0.782862 0.197535 0.019603 -> 0.782862 
 109 G B 0.512997 0.426475 0.060528 -> 0.512997 
 110 L M 0.072013 0.511432 0.416556 -> 0.511432 
 111 K B 0.643148 0.331496 0.025356 -> 0.643148 
 112 T B 0.935686 0.055252 0.009062 -> 0.935686 
 113 A E 0.094710 0.408628 0.496661 -> 0.496661 
 114 A M 0.279325 0.640352 0.080323 -> 0.640352 
 115 A B 0.977625 0.018431 0.003944 -> 0.977625 
 116 V M 0.145880 0.621987 0.232132 -> 0.621987 
 117 K E 0.001877 0.038396 0.959727 -> 0.959727 
 118 H M 0.064570 0.568232 0.367199 -> 0.568232 
 119 G E 0.037253 0.276460 0.686286 -> 0.686286 
 120 L B 0.929714 0.064704 0.005581 -> 0.929714 
 121 V M 0.249497 0.691400 0.059103 -> 0.691400 
 122 P B 0.846417 0.151332 0.002251 -> 0.846417 
 123 L B 0.968285 0.031024 0.000692 -> 0.968285 
 124 I B 0.969854 0.027922 0.002224 -> 0.969854 
 125 C B 0.930816 0.066485 0.002699 -> 0.930816 
 126 I B 0.877251 0.106526 0.016223 -> 0.877251 
 127 G B 0.582338 0.318677 0.098984 -> 0.582338 
 128 E B 0.453027 0.390443 0.156530 -> 0.453027 
 129 T E 0.072556 0.448798 0.478646 -> 0.478646 
 130 L M 0.058317 0.481542 0.460141 -> 0.481542 
 131 A E 0.021773 0.097708 0.880519 -> 0.880519 
 132 Q E 0.031769 0.295637 0.672595 -> 0.672595 
 133 R E 0.049326 0.460710 0.489964 -> 0.489964 
 134 E E 0.007744 0.113101 0.879155 -> 0.879155 
 135 A E 0.007068 0.078879 0.914053 -> 0.914053 
 136 G E 0.020628 0.135865 0.843507 -> 0.843507 
 137 E E 0.023267 0.416477 0.560256 -> 0.560256 
 138 A B 0.616050 0.302098 0.081851 -> 0.616050 
 139 D M 0.075655 0.580282 0.344063 -> 0.580282 
 140 T E 0.032344 0.340216 0.627441 -> 0.627441 
 141 V B 0.577396 0.395198 0.027406 -> 0.577396 
 142 L B 0.943738 0.047292 0.008969 -> 0.943738 
 143 K M 0.031810 0.563711 0.404479 -> 0.563711 
 144 R E 0.011570 0.270952 0.717478 -> 0.717478 
 145 Q B 0.707388 0.279724 0.012888 -> 0.707388 
 146 V B 0.981742 0.014718 0.003540 -> 0.981742 
 147 E E 0.019719 0.401169 0.579112 -> 0.579112 
 148 G M 0.203914 0.455830 0.340255 -> 0.455830 
 149 A B 0.911522 0.083369 0.005109 -> 0.911522 
 150 F B 0.734547 0.257575 0.007878 -> 0.734547 
 151 A E 0.018508 0.139767 0.841725 -> 0.841725 
 152 F E 0.072563 0.400712 0.526725 -> 0.526725 
 153 L B 0.735139 0.254914 0.009946 -> 0.735139 
 154 E E 0.012456 0.220985 0.766559 -> 0.766559 
 155 G E 0.043816 0.201876 0.754308 -> 0.754308 
 156 A M 0.261835 0.446590 0.291575 -> 0.446590 
 157 A E 0.061446 0.181630 0.756924 -> 0.756924 
 158 R E 0.090584 0.410801 0.498615 -> 0.498615 
 159 K E 0.149541 0.398288 0.452171 -> 0.452171 
 160 A M 0.215711 0.396836 0.387453 -> 0.396836 
 161 P M 0.092626 0.597102 0.310271 -> 0.597102 
 162 V B 0.881548 0.114824 0.003629 -> 0.881548 
 163 L B 0.950736 0.045818 0.003446 -> 0.950736 
 164 L B 0.963913 0.034301 0.001786 -> 0.963913 
 165 A B 0.977848 0.020828 0.001324 -> 0.977848 
 166 Y B 0.650825 0.337201 0.011973 -> 0.650825 
 167 E B 0.756581 0.220469 0.022951 -> 0.756581 
 168 P B 0.830379 0.154101 0.015519 -> 0.830379 
 169 V B 0.442233 0.431041 0.126726 -> 0.442233 
 170 W B 0.536963 0.354504 0.108533 -> 0.536963 
 171 A B 0.715810 0.214837 0.069353 -> 0.715810 
 172 I B 0.453051 0.446808 0.100141 -> 0.453051 
 173 G B 0.432877 0.339272 0.227852 -> 0.432877 
 174 V M 0.169571 0.492359 0.338070 -> 0.492359 
 175 N E 0.053801 0.267010 0.679188 -> 0.679188 
 176 G E 0.066586 0.266951 0.666463 -> 0.666463 
 177 I M 0.099100 0.537899 0.363001 -> 0.537899 
 178 P E 0.182141 0.343895 0.473964 -> 0.473964 
 179 A M 0.325121 0.366848 0.308031 -> 0.366848 
 180 T E 0.042655 0.315607 0.641739 -> 0.641739 
 181 A E 0.049737 0.384183 0.566080 -> 0.566080 
 182 D E 0.004267 0.081528 0.914205 -> 0.914205 
 183 Y M 0.192858 0.666323 0.140819 -> 0.666323 
 184 A B 0.726504 0.210173 0.063323 -> 0.726504 
 185 D E 0.047357 0.381985 0.570658 -> 0.570658 
 186 A M 0.264007 0.388977 0.347016 -> 0.388977 
 187 R B 0.598755 0.353440 0.047805 -> 0.598755 
 188 H M 0.312592 0.583551 0.103857 -> 0.583551 
 189 R E 0.003495 0.139050 0.857455 -> 0.857455 
 190 L M 0.448558 0.493454 0.057988 -> 0.493454 
 191 I B 0.728346 0.227261 0.044393 -> 0.728346 
 192 G M 0.204051 0.479103 0.316846 -> 0.479103 
 193 E E 0.057019 0.406651 0.536330 -> 0.536330 
 194 V B 0.721639 0.264247 0.014115 -> 0.721639 
 195 A B 0.603599 0.362911 0.033491 -> 0.603599 
 196 E E 0.006899 0.182944 0.810157 -> 0.810157 
 197 R E 0.009527 0.209048 0.781425 -> 0.781425 
 198 A E 0.231697 0.371120 0.397183 -> 0.397183 
 199 L M 0.298637 0.496658 0.204705 -> 0.496658 
 200 G E 0.160695 0.257757 0.581548 -> 0.581548 
 201 V E 0.063416 0.367769 0.568816 -> 0.568816 
 202 K E 0.003502 0.129345 0.867154 -> 0.867154 
 203 V B 0.776348 0.205568 0.018084 -> 0.776348 
 204 P M 0.293826 0.568408 0.137766 -> 0.568408 
 205 V B 0.908980 0.088048 0.002971 -> 0.908980 
 206 L B 0.932393 0.065240 0.002367 -> 0.932393 
 207 Y B 0.577900 0.387466 0.034634 -> 0.577900 
 208 G B 0.791927 0.172275 0.035798 -> 0.791927 
 209 G B 0.412101 0.402991 0.184907 -> 0.412101 
 210 S B 0.422032 0.381405 0.196563 -> 0.422032 
 211 V B 0.625580 0.336925 0.037495 -> 0.625580 
 212 N M 0.148687 0.586834 0.264479 -> 0.586834 
 213 P M 0.110024 0.654249 0.235727 -> 0.654249 
 214 Q E 0.001642 0.068164 0.930194 -> 0.930194 
 215 N M 0.437169 0.536342 0.026489 -> 0.536342 
 216 C B 0.968195 0.029735 0.002069 -> 0.968195 
 217 E E 0.003602 0.247470 0.748928 -> 0.748928 
 218 E E 0.013389 0.329727 0.656884 -> 0.656884 
 219 L B 0.817161 0.177055 0.005784 -> 0.817161 
 220 I M 0.427289 0.530307 0.042403 -> 0.530307 
 221 L E 0.012820 0.092714 0.894466 -> 0.894466 
 222 Q M 0.100707 0.821234 0.078059 -> 0.821234 
 223 P E 0.008282 0.083132 0.908586 -> 0.908586 
 224 H E 0.042880 0.390062 0.567059 -> 0.567059 
 225 I B 0.899087 0.099716 0.001197 -> 0.899087 
 226 D M 0.171975 0.632824 0.195201 -> 0.632824 
 227 G B 0.788993 0.193839 0.017168 -> 0.788993 
 228 L B 0.859473 0.124111 0.016415 -> 0.859473 
 229 F B 0.737468 0.245828 0.016704 -> 0.737468 
 230 I B 0.802676 0.180726 0.016598 -> 0.802676 
 231 G B 0.577749 0.348142 0.074109 -> 0.577749 
 232 R E 0.047838 0.455553 0.496609 -> 0.496609 
 233 S B 0.599528 0.330895 0.069577 -> 0.599528 
 234 A B 0.521341 0.369173 0.109486 -> 0.521341 
 235 W M 0.328908 0.567432 0.103660 -> 0.567432 
 236 D E 0.039288 0.444800 0.515912 -> 0.515912 
 237 V M 0.385490 0.518516 0.095994 -> 0.518516 
 238 G E 0.040506 0.239121 0.720373 -> 0.720373 
 239 G M 0.280823 0.625854 0.093323 -> 0.625854 
 240 Y B 0.900019 0.089541 0.010440 -> 0.900019 
 241 L M 0.355980 0.600938 0.043082 -> 0.600938 
 242 D E 0.014571 0.346753 0.638676 -> 0.638676 
 243 I B 0.917153 0.079722 0.003126 -> 0.917153 
 244 L B 0.939343 0.051185 0.009472 -> 0.939343 
 245 Q E 0.015041 0.327854 0.657105 -> 0.657105 
 246 R M 0.029266 0.643252 0.327482 -> 0.643252 
 247 V B 0.846957 0.134277 0.018766 -> 0.846957 
 248 A E 0.077011 0.428396 0.494594 -> 0.494594 
 249 R E 0.001833 0.058511 0.939656 -> 0.939656 
 250 A E 0.112866 0.379265 0.507870 -> 0.507870 
 251 I E 0.026887 0.294930 0.678183 -> 0.678183 
