# Supplementary material for: AcconPred: Predicting Solvent Accessibility and Contact Number Simultaneously by a Multitask Learning Framework under the Conditional Neural Fields Model
Source: Biomed Res Int. 2015 Aug 3;2015:678764. doi: 10.1155/2015/678764 (PMC4538422; doi:10.1155/2015/678764)
Supplement: Supplementary file 1 — Training/testing dataset as well as the CASP11 evaluation dataset could be found in the Supplementary Material. The CASP11 evaluation dataset contains all detailed results from SPINE-X, SANN, ACCpro5 and AcconPred. [file 678764.f1.zip › Supplmentary_Files/105_casp11_domain/casp11_domain_AcconPred/T0812-D1.reso]

# AcconPred: three-state solvent accessibility prediction results 
# probabilities are in the order of B (Bury, pACC: 0-10), M (Medium, pACC: 11-40) and E (Exposed, pACC: 41-100), 
# where pACC is the relative solvent accessibility value calculated by DSSP 
# output format: <position> <one letter amino acid> <predicted label> ... <probabilities> ... -> <maximal probability> 

 1 L E 0.027273 0.118908 0.853819 -> 0.853819 
 2 I M 0.127812 0.501452 0.370736 -> 0.501452 
 3 R M 0.097625 0.501293 0.401081 -> 0.501293 
 4 T B 0.513631 0.333380 0.152989 -> 0.513631 
 5 W M 0.114383 0.588609 0.297009 -> 0.588609 
 6 V B 0.853301 0.138755 0.007944 -> 0.853301 
 7 T M 0.211593 0.569208 0.219199 -> 0.569208 
 8 L B 0.662719 0.302373 0.034908 -> 0.662719 
 9 K E 0.019281 0.356039 0.624679 -> 0.624679 
 10 A E 0.121231 0.370890 0.507879 -> 0.507879 
 11 E E 0.012065 0.155476 0.832460 -> 0.832460 
 12 Q E 0.077607 0.415004 0.507390 -> 0.507390 
 13 T E 0.067557 0.348428 0.584015 -> 0.584015 
 14 I E 0.104906 0.364274 0.530820 -> 0.530820 
 15 L M 0.381924 0.510885 0.107191 -> 0.510885 
 16 P M 0.177727 0.423769 0.398504 -> 0.423769 
 17 L M 0.346828 0.520461 0.132711 -> 0.520461 
 18 V M 0.413242 0.463516 0.123242 -> 0.463516 
 19 D M 0.097266 0.492331 0.410402 -> 0.492331 
 20 E E 0.023668 0.216098 0.760234 -> 0.760234 
 21 A E 0.083688 0.202695 0.713616 -> 0.713616 
 22 L M 0.271045 0.524555 0.204400 -> 0.524555 
 23 Q E 0.039288 0.256561 0.704151 -> 0.704151 
 24 H E 0.058342 0.370237 0.571421 -> 0.571421 
 25 T E 0.120480 0.423639 0.455881 -> 0.455881 
 26 T E 0.113305 0.441179 0.445516 -> 0.445516 
 27 T M 0.159403 0.543573 0.297024 -> 0.543573 
 28 K E 0.012490 0.240570 0.746941 -> 0.746941 
 29 G B 0.391138 0.361058 0.247804 -> 0.391138 
 30 I B 0.551844 0.405974 0.042182 -> 0.551844 
 31 V M 0.158353 0.477302 0.364345 -> 0.477302 
 32 F M 0.299480 0.537995 0.162525 -> 0.537995 
 33 Q E 0.041334 0.318786 0.639879 -> 0.639879 
 34 H M 0.103343 0.506696 0.389961 -> 0.506696 
 35 P E 0.085093 0.284279 0.630628 -> 0.630628 
 36 E E 0.027416 0.231893 0.740691 -> 0.740691 
 37 I M 0.339377 0.402626 0.257997 -> 0.402626 
 38 V M 0.308953 0.431430 0.259617 -> 0.431430 
 39 A B 0.616642 0.271568 0.111789 -> 0.616642 
 40 H M 0.194856 0.567510 0.237634 -> 0.567510 
 41 M B 0.699804 0.253551 0.046645 -> 0.699804 
 42 D M 0.275210 0.502686 0.222105 -> 0.502686 
 43 L B 0.584364 0.334322 0.081314 -> 0.584364 
 44 M M 0.291068 0.492403 0.216529 -> 0.492403 
 45 R E 0.078147 0.416985 0.504869 -> 0.504869 
 46 E E 0.056348 0.387796 0.555857 -> 0.555857 
 47 D E 0.056410 0.309186 0.634405 -> 0.634405 
 48 L B 0.502978 0.374477 0.122545 -> 0.502978 
 49 H E 0.056633 0.354800 0.588567 -> 0.588567 
 50 L E 0.085788 0.394126 0.520087 -> 0.520087 
 51 E M 0.060966 0.500840 0.438194 -> 0.500840 
 52 P M 0.402495 0.432795 0.164710 -> 0.432795 
 53 F B 0.710216 0.268141 0.021643 -> 0.710216 
 54 Y M 0.428626 0.521927 0.049447 -> 0.521927 
 55 W B 0.823157 0.164612 0.012232 -> 0.823157 
 56 K M 0.091105 0.656883 0.252012 -> 0.656883 
 57 L B 0.876479 0.115999 0.007522 -> 0.876479 
 58 P M 0.300071 0.612194 0.087735 -> 0.612194 
 59 E E 0.014541 0.217518 0.767941 -> 0.767941 
 60 Q E 0.003785 0.140461 0.855754 -> 0.855754 
 61 F B 0.731125 0.256161 0.012714 -> 0.731125 
 62 E E 0.042989 0.441842 0.515168 -> 0.515168 
 63 G E 0.146032 0.321329 0.532639 -> 0.532639 
 64 K E 0.048397 0.386724 0.564879 -> 0.564879 
 65 K M 0.109290 0.564810 0.325901 -> 0.564810 
 66 L B 0.520324 0.364547 0.115128 -> 0.520324 
 67 M M 0.347588 0.479159 0.173253 -> 0.479159 
 68 A B 0.861836 0.088576 0.049588 -> 0.861836 
 69 Y B 0.475033 0.458215 0.066752 -> 0.475033 
 70 G E 0.223884 0.334959 0.441157 -> 0.441157 
 71 G M 0.346624 0.487755 0.165622 -> 0.487755 
 72 K E 0.011411 0.397065 0.591525 -> 0.591525 
 73 L B 0.962101 0.034828 0.003071 -> 0.962101 
 74 K M 0.036351 0.615993 0.347656 -> 0.615993 
 75 Y B 0.816302 0.175720 0.007978 -> 0.816302 
 76 A M 0.253346 0.653740 0.092914 -> 0.653740 
 77 I B 0.960141 0.037010 0.002848 -> 0.960141 
 78 Y M 0.068902 0.763855 0.167243 -> 0.763855 
 79 F B 0.587058 0.365968 0.046974 -> 0.587058 
 80 E M 0.083986 0.614737 0.301277 -> 0.614737 
 81 A M 0.404692 0.427248 0.168060 -> 0.427248 
 82 R E 0.013809 0.292738 0.693453 -> 0.693453 
 83 E E 0.030545 0.266808 0.702647 -> 0.702647 
 84 E E 0.009175 0.157186 0.833639 -> 0.833639 
 85 T E 0.046010 0.239201 0.714789 -> 0.714789 
 86 G E 0.164839 0.365103 0.470057 -> 0.470057 
 87 F E 0.092246 0.361047 0.546708 -> 0.546708 
 88 S M 0.275920 0.454555 0.269525 -> 0.454555 
 89 T E 0.094636 0.362270 0.543094 -> 0.543094 
 90 Y E 0.069814 0.394385 0.535801 -> 0.535801 
 91 N M 0.071948 0.472416 0.455636 -> 0.472416 
 92 P B 0.673748 0.280824 0.045427 -> 0.673748 
 93 Q M 0.156588 0.663322 0.180090 -> 0.663322 
 94 V B 0.950677 0.045851 0.003472 -> 0.950677 
 95 I B 0.572855 0.373008 0.054137 -> 0.572855 
 96 I B 0.932425 0.064135 0.003440 -> 0.932425 
 97 R M 0.112534 0.645426 0.242040 -> 0.645426 
 98 G B 0.534080 0.344637 0.121284 -> 0.534080 
 99 G E 0.112678 0.414545 0.472777 -> 0.472777 
 100 T E 0.080656 0.330629 0.588715 -> 0.588715 
 101 P M 0.119519 0.454180 0.426300 -> 0.454180 
 102 T E 0.076241 0.283473 0.640285 -> 0.640285 
 103 H M 0.068229 0.472091 0.459680 -> 0.472091 
 104 A M 0.275136 0.388894 0.335970 -> 0.388894 
 105 R M 0.115475 0.567671 0.316853 -> 0.567671 
 106 I B 0.555888 0.365978 0.078134 -> 0.555888 
 107 I B 0.664158 0.268685 0.067157 -> 0.664158 
 108 V B 0.606040 0.307310 0.086650 -> 0.606040 
 109 R M 0.146083 0.531506 0.322411 -> 0.531506 
 110 H M 0.193114 0.423630 0.383256 -> 0.423630 
 111 M M 0.135787 0.434855 0.429357 -> 0.434855 
 112 A E 0.098464 0.240990 0.660546 -> 0.660546 
 113 A M 0.183662 0.411961 0.404377 -> 0.411961 
 114 P M 0.180196 0.439340 0.380464 -> 0.439340 
 115 L E 0.044990 0.301604 0.653406 -> 0.653406 
 116 I E 0.057486 0.312327 0.630188 -> 0.630188 
 117 G E 0.029342 0.135999 0.834659 -> 0.834659 
 118 Q E 0.009212 0.230465 0.760323 -> 0.760323 
 119 L E 0.070205 0.431703 0.498092 -> 0.498092 
 120 T M 0.181571 0.613348 0.205080 -> 0.613348 
 121 R E 0.024756 0.376327 0.598916 -> 0.598916 
 122 H B 0.512311 0.469946 0.017743 -> 0.512311 
 123 E M 0.053346 0.635207 0.311447 -> 0.635207 
 124 I B 0.965283 0.031724 0.002993 -> 0.965283 
 125 E M 0.029909 0.561240 0.408851 -> 0.561240 
 126 M B 0.961087 0.037232 0.001681 -> 0.961087 
 127 T M 0.272962 0.645639 0.081399 -> 0.645639 
 128 E B 0.488770 0.377514 0.133716 -> 0.488770 
 129 K E 0.017378 0.295881 0.686741 -> 0.686741 
 130 E E 0.101401 0.372276 0.526324 -> 0.526324 
 131 W B 0.823629 0.164529 0.011842 -> 0.823629 
 132 K E 0.035353 0.453180 0.511467 -> 0.511467 
 133 Y M 0.160023 0.680079 0.159899 -> 0.680079 
 134 Y M 0.063960 0.475756 0.460284 -> 0.475756 
 135 G E 0.039734 0.261699 0.698567 -> 0.698567 
 136 D E 0.017360 0.172252 0.810388 -> 0.810388 
 137 D E 0.026598 0.239865 0.733537 -> 0.733537 
 138 P E 0.063484 0.294249 0.642267 -> 0.642267 
 139 R E 0.035316 0.327084 0.637600 -> 0.637600 
 140 V M 0.186567 0.522661 0.290772 -> 0.522661 
 141 H E 0.020019 0.176108 0.803873 -> 0.803873 
 142 R E 0.020136 0.273397 0.706467 -> 0.706467 
 143 T E 0.054475 0.334621 0.610904 -> 0.610904 
 144 V B 0.633382 0.350754 0.015864 -> 0.633382 
 145 T M 0.122834 0.539178 0.337988 -> 0.539178 
 146 R M 0.096659 0.592985 0.310356 -> 0.592985 
 147 E E 0.023772 0.226504 0.749724 -> 0.749724 
 148 D M 0.230384 0.673932 0.095684 -> 0.673932 
 149 F B 0.959846 0.033987 0.006167 -> 0.959846 
 150 L B 0.702365 0.266103 0.031533 -> 0.702365 
 151 D M 0.114258 0.587850 0.297891 -> 0.587850 
 152 I B 0.760999 0.221592 0.017410 -> 0.760999 
 153 L B 0.941567 0.052973 0.005460 -> 0.941567 
 154 Y M 0.177325 0.603274 0.219401 -> 0.603274 
 155 D M 0.072469 0.539905 0.387626 -> 0.539905 
 156 I B 0.930101 0.068435 0.001464 -> 0.930101 
 157 H E 0.028140 0.439308 0.532551 -> 0.532551 
 158 Y M 0.296913 0.661797 0.041290 -> 0.661797 
 159 I B 0.976965 0.020919 0.002117 -> 0.976965 
 160 L B 0.553274 0.427094 0.019633 -> 0.553274 
 161 I B 0.971419 0.024128 0.004453 -> 0.971419 
 162 K M 0.247231 0.680362 0.072407 -> 0.680362 
 163 A B 0.945970 0.052198 0.001832 -> 0.945970 
 164 T M 0.157860 0.702087 0.140053 -> 0.702087 
 165 Y M 0.394967 0.492054 0.112979 -> 0.492054 
 166 G M 0.154751 0.481882 0.363368 -> 0.481882 
 167 N E 0.024648 0.196564 0.778788 -> 0.778788 
 168 F E 0.055750 0.422805 0.521445 -> 0.521445 
 169 M M 0.199649 0.445341 0.355010 -> 0.445341 
 170 R M 0.091349 0.501465 0.407186 -> 0.501465 
 171 Q M 0.101868 0.522201 0.375931 -> 0.522201 
 172 S B 0.841300 0.149372 0.009327 -> 0.841300 
 173 R M 0.114975 0.677115 0.207910 -> 0.677115 
 174 I B 0.906019 0.086305 0.007675 -> 0.906019 
 175 S M 0.370623 0.494829 0.134548 -> 0.494829 
 176 E M 0.152109 0.545267 0.302624 -> 0.545267 
 177 I B 0.897790 0.096274 0.005936 -> 0.897790 
 178 S M 0.182628 0.597075 0.220297 -> 0.597075 
 179 M B 0.753621 0.231271 0.015108 -> 0.753621 
 180 E M 0.080673 0.510408 0.408919 -> 0.510408 
 181 V E 0.079899 0.386839 0.533262 -> 0.533262 
 182 A E 0.001529 0.069125 0.929346 -> 0.929346 
