# Supplementary material for: AcconPred: Predicting Solvent Accessibility and Contact Number Simultaneously by a Multitask Learning Framework under the Conditional Neural Fields Model
Source: Biomed Res Int. 2015 Aug 3;2015:678764. doi: 10.1155/2015/678764 (PMC4538422; doi:10.1155/2015/678764)
Supplement: Supplementary file 1 — Training/testing dataset as well as the CASP11 evaluation dataset could be found in the Supplementary Material. The CASP11 evaluation dataset contains all detailed results from SPINE-X, SANN, ACCpro5 and AcconPred. [file 678764.f1.zip › Supplmentary_Files/105_casp11_domain/casp11_domain_AcconPred/T0813-D1.reso]

# AcconPred: three-state solvent accessibility prediction results 
# probabilities are in the order of B (Bury, pACC: 0-10), M (Medium, pACC: 11-40) and E (Exposed, pACC: 41-100), 
# where pACC is the relative solvent accessibility value calculated by DSSP 
# output format: <position> <one letter amino acid> <predicted label> ... <probabilities> ... -> <maximal probability> 

 1 M E 0.008876 0.048985 0.942139 -> 0.942139 
 2 A E 0.012041 0.115858 0.872101 -> 0.872101 
 3 Q E 0.018352 0.184880 0.796768 -> 0.796768 
 4 Q E 0.010930 0.166103 0.822967 -> 0.822967 
 5 F B 0.707093 0.279752 0.013154 -> 0.707093 
 6 Q E 0.015534 0.377967 0.606499 -> 0.606499 
 7 T M 0.226861 0.694971 0.078168 -> 0.694971 
 8 I B 0.958572 0.039152 0.002276 -> 0.958572 
 9 A B 0.979168 0.020100 0.000732 -> 0.979168 
 10 L B 0.984501 0.014340 0.001159 -> 0.984501 
 11 I B 0.962366 0.031713 0.005921 -> 0.962366 
 12 G B 0.688875 0.275682 0.035442 -> 0.688875 
 13 I B 0.879615 0.115186 0.005199 -> 0.879615 
 14 G B 0.562972 0.371168 0.065860 -> 0.562972 
 15 L M 0.280048 0.567699 0.152252 -> 0.567699 
 16 I B 0.695531 0.244506 0.059963 -> 0.695531 
 17 G B 0.926008 0.068415 0.005577 -> 0.926008 
 18 S B 0.650242 0.305086 0.044672 -> 0.650242 
 19 S B 0.817987 0.137123 0.044890 -> 0.817987 
 20 I B 0.960701 0.037110 0.002189 -> 0.960701 
 21 A B 0.974044 0.024650 0.001305 -> 0.974044 
 22 R M 0.147223 0.703612 0.149165 -> 0.703612 
 23 D B 0.681144 0.297682 0.021174 -> 0.681144 
 24 I B 0.977920 0.020923 0.001157 -> 0.977920 
 25 R M 0.041486 0.692921 0.265592 -> 0.692921 
 26 E E 0.014374 0.134959 0.850666 -> 0.850666 
 27 K E 0.014549 0.305953 0.679497 -> 0.679497 
 28 Q E 0.031589 0.119528 0.848883 -> 0.848883 
 29 L M 0.306806 0.561504 0.131690 -> 0.561504 
 30 A E 0.099108 0.221334 0.679558 -> 0.679558 
 31 G B 0.489061 0.426891 0.084047 -> 0.489061 
 32 T M 0.206485 0.691465 0.102050 -> 0.691465 
 33 I B 0.986771 0.012568 0.000661 -> 0.986771 
 34 V B 0.926769 0.071261 0.001969 -> 0.926769 
 35 V B 0.991966 0.007022 0.001013 -> 0.991966 
 36 T B 0.813774 0.164477 0.021749 -> 0.813774 
 37 T B 0.808713 0.187393 0.003894 -> 0.808713 
 38 R E 0.087977 0.450330 0.461693 -> 0.461693 
 39 S M 0.047445 0.624495 0.328060 -> 0.624495 
 40 E E 0.001579 0.101112 0.897309 -> 0.897309 
 41 A E 0.020212 0.148506 0.831282 -> 0.831282 
 42 T M 0.185976 0.691619 0.122404 -> 0.691619 
 43 L M 0.458131 0.514122 0.027747 -> 0.514122 
 44 K E 0.001998 0.098570 0.899432 -> 0.899432 
 45 R M 0.028251 0.511974 0.459775 -> 0.511974 
 46 A B 0.968248 0.022401 0.009352 -> 0.968248 
 47 G M 0.063008 0.516275 0.420717 -> 0.516275 
 48 E E 0.001370 0.033637 0.964993 -> 0.964993 
 49 L M 0.071159 0.685068 0.243773 -> 0.685068 
 50 G E 0.036612 0.155898 0.807489 -> 0.807489 
 51 L M 0.393266 0.499591 0.107143 -> 0.499591 
 52 G E 0.139188 0.298720 0.562092 -> 0.562092 
 53 D E 0.116669 0.429847 0.453485 -> 0.453485 
 54 R E 0.024903 0.282686 0.692411 -> 0.692411 
 55 Y M 0.158861 0.642953 0.198186 -> 0.642953 
 56 T B 0.577660 0.326865 0.095475 -> 0.577660 
 57 L M 0.183776 0.462480 0.353744 -> 0.462480 
 58 S E 0.024114 0.407714 0.568172 -> 0.568172 
 59 A B 0.624479 0.297427 0.078094 -> 0.624479 
 60 A M 0.149804 0.466562 0.383634 -> 0.466562 
 61 E E 0.012096 0.191221 0.796683 -> 0.796683 
 62 A B 0.634658 0.340909 0.024433 -> 0.634658 
 63 V B 0.892974 0.098490 0.008536 -> 0.892974 
 64 E E 0.007623 0.233924 0.758453 -> 0.758453 
 65 G E 0.002292 0.102637 0.895071 -> 0.895071 
 66 A B 0.906686 0.088926 0.004388 -> 0.906686 
 67 D M 0.066053 0.607484 0.326463 -> 0.607484 
 68 L B 0.910963 0.084246 0.004791 -> 0.910963 
 69 V B 0.991602 0.008204 0.000194 -> 0.991602 
 70 V B 0.948401 0.047193 0.004406 -> 0.948401 
 71 V B 0.978824 0.019173 0.002003 -> 0.978824 
 72 S B 0.806222 0.180499 0.013278 -> 0.806222 
 73 V B 0.768007 0.220445 0.011548 -> 0.768007 
 74 P M 0.278334 0.543947 0.177719 -> 0.543947 
 75 V B 0.520149 0.410038 0.069813 -> 0.520149 
 76 G E 0.009295 0.109744 0.880962 -> 0.880962 
 77 A B 0.480808 0.452556 0.066637 -> 0.480808 
 78 S B 0.903973 0.084903 0.011124 -> 0.903973 
 79 G M 0.187542 0.553963 0.258495 -> 0.553963 
 80 A E 0.009039 0.103406 0.887555 -> 0.887555 
 81 V B 0.674870 0.319430 0.005700 -> 0.674870 
 82 A B 0.950629 0.045886 0.003485 -> 0.950629 
 83 A E 0.014280 0.206679 0.779041 -> 0.779041 
 84 E E 0.028731 0.398627 0.572642 -> 0.572642 
 85 I B 0.923199 0.072319 0.004482 -> 0.923199 
 86 A M 0.365653 0.535351 0.098996 -> 0.535351 
 87 A E 0.012601 0.037739 0.949660 -> 0.949660 
 88 H M 0.155225 0.592971 0.251804 -> 0.592971 
 89 L B 0.813040 0.179448 0.007512 -> 0.813040 
 90 K E 0.006822 0.249789 0.743389 -> 0.743389 
 91 P E 0.008136 0.069367 0.922497 -> 0.922497 
 92 G E 0.031311 0.316778 0.651912 -> 0.651912 
 93 A B 0.796992 0.200479 0.002529 -> 0.796992 
 94 I B 0.843837 0.148512 0.007651 -> 0.843837 
 95 V B 0.982564 0.016762 0.000674 -> 0.982564 
 96 T B 0.965847 0.029185 0.004969 -> 0.965847 
 97 D B 0.885383 0.105757 0.008860 -> 0.885383 
 98 V B 0.826654 0.157816 0.015530 -> 0.826654 
 99 G B 0.669763 0.262480 0.067757 -> 0.669763 
 100 S M 0.342459 0.465135 0.192405 -> 0.465135 
 101 T B 0.442144 0.353027 0.204829 -> 0.442144 
 102 K M 0.397026 0.399776 0.203198 -> 0.399776 
 103 G M 0.229318 0.508248 0.262434 -> 0.508248 
 104 S E 0.085278 0.455951 0.458771 -> 0.458771 
 105 V B 0.921137 0.068078 0.010785 -> 0.921137 
 106 I B 0.562699 0.418936 0.018365 -> 0.562699 
 107 A E 0.014012 0.142009 0.843979 -> 0.843979 
 108 Q M 0.050056 0.708818 0.241126 -> 0.708818 
 109 M B 0.928897 0.064471 0.006632 -> 0.928897 
 110 A M 0.135981 0.534787 0.329232 -> 0.534787 
 111 P E 0.003071 0.047752 0.949176 -> 0.949176 
 112 H M 0.194941 0.624232 0.180826 -> 0.624232 
 113 L B 0.487101 0.483743 0.029156 -> 0.487101 
 114 P E 0.055873 0.339419 0.604708 -> 0.604708 
 115 K E 0.001623 0.059137 0.939240 -> 0.939240 
 116 D E 0.007111 0.226354 0.766536 -> 0.766536 
 117 V B 0.720062 0.271050 0.008888 -> 0.720062 
 118 H M 0.201487 0.642949 0.155564 -> 0.642949 
 119 F B 0.766314 0.226299 0.007386 -> 0.766314 
 120 V B 0.923844 0.072714 0.003443 -> 0.923844 
 121 P B 0.869987 0.115892 0.014121 -> 0.869987 
 122 G B 0.925412 0.066408 0.008180 -> 0.925412 
 123 H B 0.799952 0.177334 0.022714 -> 0.799952 
 124 P B 0.802631 0.169309 0.028060 -> 0.802631 
 125 I B 0.682210 0.274852 0.042939 -> 0.682210 
 126 A B 0.667360 0.248823 0.083817 -> 0.667360 
 127 G B 0.643422 0.256972 0.099606 -> 0.643422 
 128 T B 0.423715 0.407773 0.168513 -> 0.423715 
 129 E M 0.292590 0.386987 0.320423 -> 0.386987 
 130 H M 0.173682 0.486944 0.339375 -> 0.486944 
 131 S B 0.494030 0.353128 0.152842 -> 0.494030 
 132 G B 0.600497 0.315247 0.084256 -> 0.600497 
 133 P M 0.254583 0.461054 0.284363 -> 0.461054 
 134 D E 0.053517 0.192846 0.753637 -> 0.753637 
 135 A M 0.351516 0.381618 0.266866 -> 0.381618 
 136 G B 0.689858 0.199365 0.110776 -> 0.689858 
 137 F M 0.150656 0.572193 0.277151 -> 0.572193 
 138 A E 0.070643 0.241653 0.687704 -> 0.687704 
 139 G M 0.226876 0.398636 0.374488 -> 0.398636 
 140 L B 0.598917 0.338484 0.062599 -> 0.598917 
 141 F B 0.883327 0.095279 0.021394 -> 0.883327 
 142 R E 0.014850 0.329764 0.655386 -> 0.655386 
 143 G E 0.053322 0.282515 0.664163 -> 0.664163 
 144 R M 0.155110 0.726173 0.118717 -> 0.726173 
 145 W M 0.463106 0.500692 0.036202 -> 0.500692 
 146 C B 0.979656 0.019449 0.000894 -> 0.979656 
 147 I B 0.982731 0.016757 0.000512 -> 0.982731 
 148 L B 0.985725 0.012012 0.002264 -> 0.985725 
 149 T B 0.951097 0.045248 0.003655 -> 0.951097 
 150 P B 0.548128 0.407135 0.044736 -> 0.548128 
 151 P B 0.521513 0.387429 0.091058 -> 0.521513 
 152 A E 0.015463 0.156316 0.828221 -> 0.828221 
 153 G E 0.018919 0.103802 0.877279 -> 0.877279 
 154 T M 0.268924 0.588041 0.143035 -> 0.588041 
 155 D E 0.013789 0.290372 0.695839 -> 0.695839 
 156 E E 0.002718 0.082950 0.914332 -> 0.914332 
 157 E E 0.018110 0.287533 0.694356 -> 0.694356 
 158 A B 0.730529 0.237208 0.032263 -> 0.730529 
 159 V B 0.570761 0.421593 0.007646 -> 0.570761 
 160 A E 0.028031 0.201591 0.770378 -> 0.770378 
 161 R M 0.041547 0.714360 0.244093 -> 0.714360 
 162 L B 0.995082 0.003852 0.001066 -> 0.995082 
 163 R M 0.057868 0.817649 0.124483 -> 0.817649 
 164 L E 0.031223 0.375346 0.593431 -> 0.593431 
 165 F B 0.919638 0.074874 0.005488 -> 0.919638 
 166 W B 0.924775 0.073368 0.001857 -> 0.924775 
 167 E E 0.006962 0.194020 0.799018 -> 0.799018 
 168 T E 0.012414 0.290358 0.697228 -> 0.697228 
 169 L B 0.594007 0.373895 0.032098 -> 0.594007 
 170 G E 0.059587 0.294527 0.645886 -> 0.645886 
 171 S B 0.479480 0.461048 0.059472 -> 0.479480 
 172 M E 0.024617 0.353740 0.621643 -> 0.621643 
 173 V M 0.198134 0.635369 0.166497 -> 0.635369 
 174 D M 0.099959 0.683082 0.216959 -> 0.683082 
 175 E E 0.017308 0.344427 0.638265 -> 0.638265 
 176 M B 0.818655 0.175318 0.006027 -> 0.818655 
 177 D M 0.051463 0.558727 0.389810 -> 0.558727 
 178 P M 0.154993 0.585945 0.259062 -> 0.585945 
 179 K E 0.007782 0.177639 0.814579 -> 0.814579 
 180 H M 0.127979 0.648108 0.223914 -> 0.648108 
 181 H B 0.821510 0.167430 0.011060 -> 0.821510 
 182 D B 0.612527 0.271869 0.115603 -> 0.612527 
 183 K M 0.057374 0.596022 0.346604 -> 0.596022 
 184 V B 0.820121 0.166334 0.013545 -> 0.820121 
 185 L B 0.912980 0.069290 0.017731 -> 0.912980 
 186 A B 0.774199 0.158894 0.066907 -> 0.774199 
 187 I B 0.736970 0.245459 0.017570 -> 0.736970 
 188 V B 0.892045 0.100419 0.007536 -> 0.892045 
 189 S B 0.650396 0.268989 0.080615 -> 0.650396 
 190 H B 0.807338 0.176799 0.015863 -> 0.807338 
 191 L B 0.969955 0.025887 0.004158 -> 0.969955 
 192 P B 0.860460 0.119698 0.019842 -> 0.860460 
 193 H B 0.656132 0.314621 0.029246 -> 0.656132 
 194 I B 0.977995 0.019184 0.002821 -> 0.977995 
 195 I B 0.985646 0.012191 0.002163 -> 0.985646 
 196 A B 0.960734 0.035488 0.003778 -> 0.960734 
 197 Y B 0.757513 0.225827 0.016661 -> 0.757513 
 198 N B 0.926387 0.067405 0.006209 -> 0.926387 
 199 I B 0.911329 0.083582 0.005088 -> 0.911329 
 200 V B 0.853556 0.126788 0.019656 -> 0.853556 
 201 G M 0.455778 0.461650 0.082572 -> 0.461650 
 202 T B 0.604129 0.362659 0.033212 -> 0.604129 
 203 A B 0.874174 0.113742 0.012084 -> 0.874174 
 204 D M 0.065682 0.492905 0.441413 -> 0.492905 
 205 D E 0.043671 0.333674 0.622655 -> 0.622655 
 206 L M 0.381927 0.515882 0.102191 -> 0.515882 
 207 E E 0.020054 0.148062 0.831884 -> 0.831884 
 208 T E 0.045748 0.254084 0.700168 -> 0.700168 
 209 V M 0.309890 0.481191 0.208920 -> 0.481191 
 210 T E 0.051376 0.344503 0.604121 -> 0.604121 
 211 E E 0.022426 0.362030 0.615544 -> 0.615544 
 212 S E 0.019759 0.112647 0.867594 -> 0.867594 
 213 E M 0.096786 0.651526 0.251688 -> 0.651526 
 214 V B 0.894572 0.093036 0.012392 -> 0.894572 
 215 I M 0.102726 0.535389 0.361885 -> 0.535389 
 216 K E 0.010519 0.149691 0.839790 -> 0.839790 
 217 Y M 0.446089 0.496116 0.057795 -> 0.496116 
 218 S B 0.436439 0.340907 0.222654 -> 0.436439 
 219 A E 0.315690 0.338376 0.345934 -> 0.345934 
 220 S E 0.157867 0.382781 0.459352 -> 0.459352 
 221 G B 0.437269 0.395063 0.167667 -> 0.437269 
 222 F B 0.771233 0.194215 0.034553 -> 0.771233 
 223 R M 0.122190 0.552682 0.325129 -> 0.552682 
 224 D M 0.425076 0.458018 0.116906 -> 0.458018 
 225 F B 0.691570 0.263119 0.045311 -> 0.691570 
 226 T B 0.651744 0.267515 0.080741 -> 0.651744 
 227 R M 0.384217 0.400118 0.215665 -> 0.400118 
 228 L B 0.799472 0.163854 0.036674 -> 0.799472 
 229 A B 0.773550 0.185381 0.041068 -> 0.773550 
 230 A E 0.104079 0.420885 0.475036 -> 0.475036 
 231 S M 0.234077 0.440981 0.324942 -> 0.440981 
 232 D M 0.131441 0.557412 0.311147 -> 0.557412 
 233 P M 0.354491 0.488924 0.156585 -> 0.488924 
 234 T E 0.064738 0.398967 0.536294 -> 0.536294 
 235 M B 0.587487 0.340798 0.071715 -> 0.587487 
 236 W B 0.838837 0.148650 0.012513 -> 0.838837 
 237 R M 0.151693 0.687791 0.160516 -> 0.687791 
 238 D M 0.142502 0.470290 0.387208 -> 0.470290 
 239 V B 0.895868 0.085684 0.018449 -> 0.895868 
 240 C B 0.900122 0.090898 0.008980 -> 0.900122 
 241 L E 0.042592 0.467504 0.489904 -> 0.489904 
 242 H M 0.051794 0.527115 0.421091 -> 0.527115 
 243 N B 0.719860 0.257675 0.022465 -> 0.719860 
 244 K E 0.018099 0.388586 0.593316 -> 0.593316 
 245 D E 0.003009 0.043390 0.953601 -> 0.953601 
 246 A M 0.242200 0.617853 0.139947 -> 0.617853 
 247 I B 0.976038 0.019385 0.004577 -> 0.976038 
 248 L M 0.091144 0.682951 0.225905 -> 0.682951 
 249 E E 0.004260 0.166941 0.828799 -> 0.828799 
 250 M B 0.586750 0.400345 0.012904 -> 0.586750 
 251 L B 0.914133 0.075925 0.009942 -> 0.914133 
 252 A E 0.044317 0.437336 0.518348 -> 0.518348 
 253 R E 0.005310 0.279836 0.714854 -> 0.714854 
 254 F B 0.920492 0.075733 0.003774 -> 0.920492 
 255 S M 0.187178 0.725943 0.086878 -> 0.725943 
 256 E E 0.001314 0.071556 0.927130 -> 0.927130 
 257 D M 0.247067 0.703849 0.049084 -> 0.703849 
 258 L B 0.948715 0.037386 0.013899 -> 0.948715 
 259 A E 0.031680 0.358078 0.610241 -> 0.610241 
 260 S M 0.034062 0.563670 0.402268 -> 0.563670 
 261 L B 0.965305 0.031848 0.002846 -> 0.965305 
 262 Q M 0.145744 0.773207 0.081049 -> 0.773207 
 263 R E 0.001925 0.132269 0.865805 -> 0.865805 
 264 A B 0.509230 0.482263 0.008507 -> 0.509230 
 265 I B 0.884347 0.102736 0.012917 -> 0.884347 
 266 R E 0.003776 0.120040 0.876183 -> 0.876183 
 267 W E 0.011886 0.267874 0.720241 -> 0.720241 
 268 G E 0.007694 0.116583 0.875722 -> 0.875722 
 269 D M 0.027782 0.614162 0.358056 -> 0.614162 
 270 G M 0.148193 0.552900 0.298907 -> 0.552900 
 271 D E 0.005827 0.058693 0.935480 -> 0.935480 
 272 K E 0.008719 0.356179 0.635102 -> 0.635102 
 273 L B 0.967738 0.024409 0.007854 -> 0.967738 
 274 F M 0.184026 0.726744 0.089231 -> 0.726744 
 275 D E 0.004420 0.165043 0.830537 -> 0.830537 
 276 L B 0.529008 0.461020 0.009972 -> 0.529008 
 277 F B 0.964696 0.029998 0.005306 -> 0.964696 
 278 T M 0.052068 0.476061 0.471871 -> 0.476061 
 279 R E 0.017077 0.401606 0.581318 -> 0.581318 
 280 T B 0.941945 0.042889 0.015166 -> 0.941945 
 281 R M 0.061730 0.668461 0.269809 -> 0.668461 
 282 A E 0.021170 0.083433 0.895396 -> 0.895396 
 283 I M 0.395524 0.577869 0.026607 -> 0.577869 
 284 R M 0.423590 0.531296 0.045114 -> 0.531296 
 285 R E 0.007944 0.116575 0.875481 -> 0.875481 
 286 S E 0.042102 0.435541 0.522356 -> 0.522356 
 287 I B 0.852411 0.136053 0.011536 -> 0.852411 
 288 V M 0.156122 0.573492 0.270387 -> 0.573492 
 289 Q E 0.004200 0.054968 0.940832 -> 0.940832 
 290 A E 0.070641 0.328775 0.600584 -> 0.600584 
 291 G E 0.053737 0.325191 0.621073 -> 0.621073 
 292 Q E 0.033616 0.314359 0.652026 -> 0.652026 
 293 D E 0.015163 0.120131 0.864706 -> 0.864706 
 294 T E 0.086136 0.387643 0.526221 -> 0.526221 
 295 A E 0.080545 0.275023 0.644432 -> 0.644432 
 296 M M 0.179826 0.507866 0.312308 -> 0.507866 
 297 P E 0.125476 0.418633 0.455891 -> 0.455891 
 298 D E 0.044831 0.270657 0.684513 -> 0.684513 
 299 F E 0.085388 0.284272 0.630340 -> 0.630340 
 300 G E 0.072355 0.285363 0.642282 -> 0.642282 
 301 R E 0.015494 0.166562 0.817944 -> 0.817944 
 302 H E 0.009505 0.079820 0.910675 -> 0.910675 
