# Supplementary material for: AcconPred: Predicting Solvent Accessibility and Contact Number Simultaneously by a Multitask Learning Framework under the Conditional Neural Fields Model
Source: Biomed Res Int. 2015 Aug 3;2015:678764. doi: 10.1155/2015/678764 (PMC4538422; doi:10.1155/2015/678764)
Supplement: Supplementary file 1 — Training/testing dataset as well as the CASP11 evaluation dataset could be found in the Supplementary Material. The CASP11 evaluation dataset contains all detailed results from SPINE-X, SANN, ACCpro5 and AcconPred. [file 678764.f1.zip › Supplmentary_Files/105_casp11_domain/casp11_domain_AcconPred/T0814-D1.reso]

# AcconPred: three-state solvent accessibility prediction results 
# probabilities are in the order of B (Bury, pACC: 0-10), M (Medium, pACC: 11-40) and E (Exposed, pACC: 41-100), 
# where pACC is the relative solvent accessibility value calculated by DSSP 
# output format: <position> <one letter amino acid> <predicted label> ... <probabilities> ... -> <maximal probability> 

 1 Q E 0.006599 0.033365 0.960036 -> 0.960036 
 2 V M 0.077771 0.481172 0.441057 -> 0.481172 
 3 K E 0.003119 0.111794 0.885086 -> 0.885086 
 4 F M 0.149366 0.557331 0.293303 -> 0.557331 
 5 F M 0.102905 0.663884 0.233211 -> 0.663884 
 6 T M 0.102214 0.466973 0.430813 -> 0.466973 
 7 D E 0.033395 0.410291 0.556314 -> 0.556314 
 8 V B 0.661090 0.293712 0.045198 -> 0.661090 
 9 N M 0.229020 0.520970 0.250011 -> 0.520970 
 10 S M 0.136689 0.534606 0.328705 -> 0.534606 
 11 K E 0.006271 0.054492 0.939237 -> 0.939237 
 12 Q E 0.035742 0.451148 0.513110 -> 0.513110 
 13 I B 0.853126 0.141678 0.005196 -> 0.853126 
 14 K M 0.079206 0.617211 0.303583 -> 0.617211 
 15 T B 0.538030 0.403401 0.058569 -> 0.538030 
 16 L B 0.907199 0.089675 0.003127 -> 0.907199 
 17 Q M 0.440432 0.479232 0.080336 -> 0.479232 
 18 V B 0.966503 0.032707 0.000791 -> 0.966503 
 19 K M 0.066833 0.648170 0.284997 -> 0.648170 
 20 V B 0.494730 0.420206 0.085064 -> 0.494730 
 21 A E 0.050770 0.305921 0.643309 -> 0.643309 
 22 G E 0.022413 0.137859 0.839728 -> 0.839728 
 23 E E 0.008634 0.152228 0.839138 -> 0.839138 
 24 L E 0.074269 0.362548 0.563182 -> 0.563182 
 25 I M 0.228340 0.557314 0.214345 -> 0.557314 
 26 S E 0.173356 0.383964 0.442680 -> 0.442680 
 27 E M 0.192141 0.502007 0.305852 -> 0.502007 
 28 P B 0.684707 0.253955 0.061338 -> 0.684707 
 29 Y M 0.408048 0.539087 0.052865 -> 0.539087 
 30 I B 0.725052 0.240982 0.033966 -> 0.725052 
 31 A M 0.255314 0.496356 0.248330 -> 0.496356 
 32 L B 0.796139 0.182650 0.021211 -> 0.796139 
 33 G E 0.092063 0.402706 0.505230 -> 0.505230 
 34 G E 0.092898 0.372232 0.534870 -> 0.534870 
 35 E E 0.002744 0.076240 0.921016 -> 0.921016 
 36 E E 0.042119 0.405427 0.552454 -> 0.552454 
 37 Q M 0.031759 0.522488 0.445753 -> 0.522488 
 38 I B 0.926462 0.070286 0.003252 -> 0.926462 
 39 E M 0.066594 0.762329 0.171077 -> 0.762329 
 40 I B 0.936236 0.061049 0.002715 -> 0.936236 
 41 N M 0.139942 0.698251 0.161807 -> 0.698251 
 42 F B 0.894457 0.097212 0.008331 -> 0.894457 
 43 D M 0.170781 0.607748 0.221470 -> 0.607748 
 44 G B 0.415174 0.371286 0.213540 -> 0.415174 
 45 L B 0.526621 0.359974 0.113405 -> 0.526621 
 46 G M 0.177560 0.415958 0.406482 -> 0.415958 
 47 S E 0.081007 0.252438 0.666555 -> 0.666555 
 48 G E 0.028128 0.205789 0.766082 -> 0.766082 
 49 Y M 0.055758 0.515970 0.428272 -> 0.515970 
 50 T M 0.118660 0.476654 0.404685 -> 0.476654 
 51 R M 0.082960 0.577027 0.340013 -> 0.577027 
 52 Y B 0.796572 0.192894 0.010534 -> 0.796572 
 53 A B 0.496095 0.459559 0.044346 -> 0.496095 
 54 Y B 0.868950 0.120479 0.010571 -> 0.868950 
 55 N M 0.452701 0.500619 0.046680 -> 0.500619 
 56 V B 0.946550 0.046642 0.006808 -> 0.946550 
 57 V M 0.390011 0.485451 0.124538 -> 0.485451 
 58 H B 0.676148 0.258511 0.065341 -> 0.676148 
 59 C B 0.772509 0.207075 0.020417 -> 0.772509 
 60 N M 0.247053 0.555416 0.197531 -> 0.555416 
 61 A M 0.303130 0.432545 0.264325 -> 0.432545 
 62 D E 0.092671 0.358202 0.549128 -> 0.549128 
 63 W B 0.576598 0.404375 0.019027 -> 0.576598 
 64 T E 0.011822 0.211043 0.777136 -> 0.777136 
 65 Q E 0.016336 0.241664 0.741999 -> 0.741999 
 66 S M 0.418665 0.442732 0.138602 -> 0.442732 
 67 Q E 0.005882 0.181639 0.812479 -> 0.812479 
 68 L B 0.751432 0.224619 0.023949 -> 0.751432 
 69 S M 0.261906 0.538257 0.199837 -> 0.538257 
 70 P E 0.055558 0.295297 0.649146 -> 0.649146 
 71 I M 0.174461 0.471935 0.353604 -> 0.471935 
 72 E M 0.084937 0.474291 0.440771 -> 0.474291 
 73 Y B 0.462059 0.459621 0.078320 -> 0.462059 
 74 M B 0.642005 0.269417 0.088578 -> 0.642005 
 75 N E 0.044212 0.320389 0.635398 -> 0.635398 
 76 G E 0.296601 0.346623 0.356776 -> 0.356776 
 77 F B 0.524556 0.361988 0.113457 -> 0.524556 
 78 Q E 0.039767 0.266047 0.694186 -> 0.694186 
 79 G E 0.050164 0.190300 0.759536 -> 0.759536 
 80 T M 0.284555 0.518550 0.196895 -> 0.518550 
 81 T M 0.131899 0.563483 0.304618 -> 0.563483 
 82 I B 0.862620 0.131795 0.005586 -> 0.862620 
 83 D E 0.056855 0.454952 0.488192 -> 0.488192 
 84 D E 0.096282 0.426621 0.477097 -> 0.477097 
 85 F B 0.456829 0.444533 0.098638 -> 0.456829 
 86 A E 0.117196 0.381384 0.501420 -> 0.501420 
 87 N E 0.097549 0.397678 0.504773 -> 0.504773 
 88 S B 0.691907 0.245663 0.062430 -> 0.691907 
 89 I M 0.189104 0.415728 0.395167 -> 0.415728 
 90 G E 0.257663 0.358686 0.383650 -> 0.383650 
 91 T B 0.648217 0.274591 0.077192 -> 0.648217 
 92 T E 0.119984 0.399452 0.480564 -> 0.480564 
 93 T B 0.470122 0.405845 0.124033 -> 0.470122 
 94 Q E 0.075158 0.389281 0.535561 -> 0.535561 
 95 Y B 0.569178 0.400929 0.029893 -> 0.569178 
 96 S B 0.593180 0.330154 0.076666 -> 0.593180 
 97 N B 0.549362 0.355437 0.095201 -> 0.549362 
 98 Y B 0.586326 0.370300 0.043374 -> 0.586326 
 99 R M 0.042877 0.611656 0.345466 -> 0.611656 
 100 L B 0.886266 0.105278 0.008456 -> 0.886266 
 101 L M 0.144274 0.672911 0.182815 -> 0.672911 
 102 L B 0.851935 0.136779 0.011285 -> 0.851935 
 103 P M 0.140238 0.524418 0.335345 -> 0.524418 
 104 N M 0.267476 0.542925 0.189599 -> 0.542925 
 105 D E 0.006109 0.092059 0.901832 -> 0.901832 
 106 D E 0.009465 0.166569 0.823966 -> 0.823966 
 107 V B 0.565924 0.397353 0.036723 -> 0.565924 
 108 Q E 0.029296 0.334119 0.636585 -> 0.636585 
 109 F B 0.572658 0.411219 0.016123 -> 0.572658 
 110 K E 0.011652 0.229526 0.758822 -> 0.758822 
 111 V M 0.261979 0.498327 0.239694 -> 0.498327 
 112 S M 0.353804 0.440761 0.205436 -> 0.440761 
 113 G M 0.362241 0.369421 0.268338 -> 0.369421 
 114 N M 0.406051 0.448768 0.145180 -> 0.448768 
 115 Y B 0.694255 0.280615 0.025130 -> 0.694255 
 116 A B 0.636528 0.320681 0.042790 -> 0.636528 
 117 I B 0.961284 0.036244 0.002472 -> 0.961284 
 118 Q M 0.353768 0.593538 0.052694 -> 0.593538 
 119 V B 0.931397 0.060410 0.008194 -> 0.931397 
 120 Y B 0.483070 0.480671 0.036260 -> 0.483070 
 121 N M 0.282648 0.597034 0.120317 -> 0.597034 
 122 E E 0.020183 0.261940 0.717877 -> 0.717877 
 123 D E 0.007034 0.112599 0.880367 -> 0.880367 
 124 T M 0.058893 0.655488 0.285619 -> 0.655488 
 125 P E 0.032486 0.187011 0.780503 -> 0.780503 
 126 D E 0.021730 0.175315 0.802955 -> 0.802955 
 127 Q M 0.035764 0.550941 0.413295 -> 0.550941 
 128 I B 0.538989 0.375788 0.085223 -> 0.538989 
 129 I B 0.530738 0.410365 0.058897 -> 0.530738 
 130 F B 0.847961 0.139967 0.012072 -> 0.847961 
 131 T M 0.244420 0.507973 0.247607 -> 0.507973 
 132 A B 0.656545 0.279907 0.063549 -> 0.656545 
 133 C M 0.323916 0.483764 0.192321 -> 0.483764 
 134 F B 0.683839 0.263846 0.052315 -> 0.683839 
 135 S B 0.676131 0.266566 0.057303 -> 0.676131 
 136 V M 0.283104 0.456644 0.260251 -> 0.456644 
 137 V E 0.006618 0.139296 0.854086 -> 0.854086 
