# Supplementary material for: AcconPred: Predicting Solvent Accessibility and Contact Number Simultaneously by a Multitask Learning Framework under the Conditional Neural Fields Model
Source: Biomed Res Int. 2015 Aug 3;2015:678764. doi: 10.1155/2015/678764 (PMC4538422; doi:10.1155/2015/678764)
Supplement: Supplementary file 1 — Training/testing dataset as well as the CASP11 evaluation dataset could be found in the Supplementary Material. The CASP11 evaluation dataset contains all detailed results from SPINE-X, SANN, ACCpro5 and AcconPred. [file 678764.f1.zip › Supplmentary_Files/105_casp11_domain/casp11_domain_AcconPred/T0814-D2.reso]

# AcconPred: three-state solvent accessibility prediction results 
# probabilities are in the order of B (Bury, pACC: 0-10), M (Medium, pACC: 11-40) and E (Exposed, pACC: 41-100), 
# where pACC is the relative solvent accessibility value calculated by DSSP 
# output format: <position> <one letter amino acid> <predicted label> ... <probabilities> ... -> <maximal probability> 

 1 E E 0.011020 0.054031 0.934949 -> 0.934949 
 2 P E 0.012874 0.145121 0.842005 -> 0.842005 
 3 V E 0.048397 0.394176 0.557427 -> 0.557427 
 4 V B 0.707020 0.267068 0.025912 -> 0.707020 
 5 N E 0.045278 0.399138 0.555584 -> 0.555584 
 6 I B 0.757181 0.233019 0.009800 -> 0.757181 
 7 S M 0.045825 0.480319 0.473856 -> 0.480319 
 8 A B 0.751077 0.221045 0.027879 -> 0.751077 
 9 S E 0.031714 0.426483 0.541802 -> 0.541802 
 10 V B 0.510831 0.433222 0.055947 -> 0.510831 
 11 S M 0.044767 0.507790 0.447443 -> 0.507790 
 12 G E 0.118202 0.427413 0.454385 -> 0.454385 
 13 N M 0.091910 0.498110 0.409979 -> 0.498110 
 14 T M 0.118389 0.454676 0.426935 -> 0.454676 
 15 D E 0.088612 0.354527 0.556861 -> 0.556861 
 16 I M 0.356718 0.476490 0.166792 -> 0.476490 
 17 D E 0.009673 0.109812 0.880515 -> 0.880515 
 18 T E 0.076779 0.354082 0.569139 -> 0.569139 
 19 N M 0.166713 0.438835 0.394452 -> 0.438835 
 20 Q E 0.020676 0.239245 0.740079 -> 0.740079 
 21 S E 0.075643 0.352196 0.572161 -> 0.572161 
 22 H M 0.149832 0.569427 0.280741 -> 0.569427 
 23 Q B 0.687387 0.256684 0.055929 -> 0.687387 
 24 Q M 0.102239 0.540112 0.357649 -> 0.540112 
 25 V B 0.875395 0.117954 0.006651 -> 0.875395 
 26 S M 0.191271 0.656711 0.152018 -> 0.656711 
 27 F B 0.853019 0.140672 0.006309 -> 0.853019 
 28 N M 0.063659 0.679199 0.257142 -> 0.679199 
 29 I B 0.791355 0.199636 0.009009 -> 0.791355 
 30 N M 0.048642 0.497791 0.453567 -> 0.497791 
 31 N M 0.403207 0.498115 0.098678 -> 0.498115 
 32 K E 0.003087 0.106648 0.890265 -> 0.890265 
 33 N E 0.007507 0.093837 0.898655 -> 0.898655 
 34 F M 0.481220 0.483006 0.035774 -> 0.483006 
 35 P E 0.034556 0.308390 0.657054 -> 0.657054 
 36 I B 0.745387 0.245665 0.008948 -> 0.745387 
 37 T E 0.069205 0.403356 0.527439 -> 0.527439 
 38 Y M 0.379574 0.532632 0.087794 -> 0.532632 
 39 P M 0.215481 0.452780 0.331739 -> 0.452780 
 40 Q E 0.011373 0.197881 0.790746 -> 0.790746 
 41 T E 0.029138 0.294575 0.676287 -> 0.676287 
 42 D E 0.038128 0.407732 0.554140 -> 0.554140 
 43 L B 0.873473 0.123332 0.003195 -> 0.873473 
 44 K M 0.123640 0.724577 0.151784 -> 0.724577 
 45 I B 0.906312 0.091360 0.002328 -> 0.906312 
 46 F B 0.860333 0.134685 0.004982 -> 0.860333 
 47 V B 0.970002 0.029353 0.000645 -> 0.970002 
 48 Y B 0.835909 0.155846 0.008245 -> 0.835909 
 49 Q B 0.873821 0.114132 0.012047 -> 0.873821 
 50 D B 0.719612 0.244349 0.036039 -> 0.719612 
 51 N M 0.207821 0.519039 0.273140 -> 0.519039 
 52 R M 0.193667 0.606888 0.199445 -> 0.606888 
 53 R M 0.108396 0.492898 0.398706 -> 0.492898 
 54 D E 0.050867 0.195463 0.753670 -> 0.753670 
 55 N M 0.164581 0.536973 0.298447 -> 0.536973 
 56 A B 0.696155 0.210357 0.093488 -> 0.696155 
 57 V M 0.272455 0.542831 0.184714 -> 0.542831 
 58 T M 0.113778 0.471024 0.415198 -> 0.471024 
 59 D E 0.161184 0.387989 0.450827 -> 0.450827 
 60 L B 0.610880 0.326811 0.062309 -> 0.610880 
 61 Q M 0.070127 0.470143 0.459730 -> 0.470143 
 62 P B 0.609683 0.293751 0.096566 -> 0.609683 
 63 M M 0.410665 0.458527 0.130809 -> 0.458527 
 64 S M 0.363757 0.446013 0.190230 -> 0.446013 
 65 I M 0.203595 0.524740 0.271664 -> 0.524740 
 66 L M 0.106483 0.552155 0.341361 -> 0.552155 
 67 E E 0.006087 0.100232 0.893681 -> 0.893681 
 68 N E 0.025128 0.251337 0.723535 -> 0.723535 
 69 Q E 0.024099 0.344809 0.631092 -> 0.631092 
 70 I B 0.663748 0.298907 0.037346 -> 0.663748 
 71 S M 0.217778 0.624216 0.158006 -> 0.624216 
 72 Y B 0.595229 0.374216 0.030556 -> 0.595229 
 73 T M 0.098698 0.572381 0.328921 -> 0.572381 
 74 Y M 0.241589 0.593842 0.164569 -> 0.593842 
 75 N M 0.163917 0.442895 0.393187 -> 0.442895 
 76 R E 0.022776 0.316874 0.660350 -> 0.660350 
 77 N E 0.026515 0.239954 0.733530 -> 0.733530 
 78 L B 0.594625 0.368815 0.036561 -> 0.594625 
 79 I M 0.275191 0.451065 0.273744 -> 0.451065 
 80 F B 0.884413 0.104683 0.010904 -> 0.884413 
 81 P E 0.119236 0.430691 0.450073 -> 0.450073 
 82 A B 0.652849 0.212540 0.134610 -> 0.652849 
 83 G B 0.505149 0.295297 0.199554 -> 0.505149 
 84 N B 0.490140 0.375649 0.134211 -> 0.490140 
 85 Y M 0.371794 0.495688 0.132518 -> 0.495688 
 86 Y B 0.488234 0.404772 0.106994 -> 0.488234 
 87 Q B 0.465745 0.432438 0.101817 -> 0.465745 
 88 T M 0.228964 0.516311 0.254725 -> 0.516311 
 89 Q B 0.814808 0.120096 0.065096 -> 0.814808 
 90 N M 0.423555 0.429999 0.146445 -> 0.429999 
 91 E B 0.562553 0.237259 0.200187 -> 0.562553 
 92 Y M 0.303348 0.494844 0.201808 -> 0.494844 
 93 S B 0.441672 0.362016 0.196312 -> 0.441672 
 94 I B 0.792942 0.182452 0.024606 -> 0.792942 
 95 Y M 0.228037 0.564555 0.207408 -> 0.564555 
 96 V B 0.744354 0.212815 0.042831 -> 0.744354 
 97 Y M 0.174268 0.545539 0.280194 -> 0.545539 
 98 Y E 0.247403 0.369981 0.382616 -> 0.382616 
 99 R E 0.076639 0.456685 0.466676 -> 0.466676 
 100 P E 0.175897 0.350286 0.473817 -> 0.473817 
 101 M B 0.663718 0.241897 0.094385 -> 0.663718 
 102 G M 0.326134 0.351360 0.322507 -> 0.351360 
 103 A B 0.389285 0.309393 0.301321 -> 0.389285 
 104 R M 0.099744 0.484435 0.415821 -> 0.484435 
 105 Y M 0.373855 0.508054 0.118090 -> 0.508054 
 106 D M 0.293364 0.440293 0.266343 -> 0.440293 
 107 R M 0.178050 0.431179 0.390771 -> 0.431179 
 108 L M 0.353033 0.509965 0.137002 -> 0.509965 
 109 I M 0.283398 0.466535 0.250067 -> 0.466535 
 110 G E 0.127260 0.308663 0.564077 -> 0.564077 
 111 V M 0.119932 0.497651 0.382416 -> 0.497651 
 112 T M 0.089228 0.496204 0.414568 -> 0.496204 
 113 T E 0.054258 0.362558 0.583184 -> 0.583184 
 114 V M 0.273100 0.534743 0.192157 -> 0.534743 
 115 R E 0.014724 0.226154 0.759122 -> 0.759122 
 116 N E 0.006060 0.053229 0.940711 -> 0.940711 
