# Supplementary material for: AcconPred: Predicting Solvent Accessibility and Contact Number Simultaneously by a Multitask Learning Framework under the Conditional Neural Fields Model
Source: Biomed Res Int. 2015 Aug 3;2015:678764. doi: 10.1155/2015/678764 (PMC4538422; doi:10.1155/2015/678764)
Supplement: Supplementary file 1 — Training/testing dataset as well as the CASP11 evaluation dataset could be found in the Supplementary Material. The CASP11 evaluation dataset contains all detailed results from SPINE-X, SANN, ACCpro5 and AcconPred. [file 678764.f1.zip › Supplmentary_Files/105_casp11_domain/casp11_domain_AcconPred/T0814-D3.reso]

# AcconPred: three-state solvent accessibility prediction results 
# probabilities are in the order of B (Bury, pACC: 0-10), M (Medium, pACC: 11-40) and E (Exposed, pACC: 41-100), 
# where pACC is the relative solvent accessibility value calculated by DSSP 
# output format: <position> <one letter amino acid> <predicted label> ... <probabilities> ... -> <maximal probability> 

 1 N E 0.002783 0.043541 0.953676 -> 0.953676 
 2 E E 0.032973 0.220597 0.746429 -> 0.746429 
 3 Y M 0.142926 0.570840 0.286235 -> 0.570840 
 4 R M 0.156598 0.601578 0.241824 -> 0.601578 
 5 R M 0.054351 0.516269 0.429380 -> 0.516269 
 6 M B 0.833863 0.136595 0.029541 -> 0.833863 
 7 E M 0.341211 0.506079 0.152710 -> 0.506079 
 8 F B 0.660390 0.270876 0.068734 -> 0.660390 
 9 L M 0.273154 0.558696 0.168150 -> 0.558696 
 10 S M 0.364096 0.445769 0.190135 -> 0.445769 
 11 N B 0.424117 0.391607 0.184276 -> 0.424117 
 12 K E 0.066657 0.347576 0.585767 -> 0.585767 
 13 Y M 0.172582 0.563253 0.264164 -> 0.563253 
 14 N E 0.057430 0.271185 0.671386 -> 0.671386 
 15 G E 0.326921 0.327320 0.345760 -> 0.345760 
 16 M E 0.220390 0.370994 0.408616 -> 0.408616 
 17 H M 0.189770 0.576156 0.234073 -> 0.576156 
 18 V B 0.841691 0.148298 0.010011 -> 0.841691 
 19 E M 0.137224 0.561513 0.301264 -> 0.561513 
 20 N M 0.169769 0.525048 0.305183 -> 0.525048 
 21 I B 0.651200 0.327298 0.021502 -> 0.651200 
 22 S E 0.077001 0.445586 0.477414 -> 0.477414 
 23 F M 0.288674 0.578435 0.132891 -> 0.578435 
 24 H E 0.011978 0.280476 0.707546 -> 0.707546 
 25 N E 0.033470 0.271946 0.694584 -> 0.694584 
 26 P E 0.009868 0.124886 0.865246 -> 0.865246 
 27 Y M 0.132845 0.645604 0.221552 -> 0.645604 
 28 Y B 0.529740 0.416229 0.054031 -> 0.529740 
 29 N B 0.474175 0.455323 0.070503 -> 0.474175 
 30 V B 0.925270 0.070968 0.003763 -> 0.925270 
 31 E B 0.582878 0.388103 0.029019 -> 0.582878 
 32 L B 0.955079 0.042408 0.002513 -> 0.955079 
 33 M B 0.667942 0.300480 0.031578 -> 0.667942 
 34 T B 0.735019 0.227722 0.037259 -> 0.735019 
 35 D B 0.493924 0.394470 0.111605 -> 0.493924 
 36 Y M 0.069324 0.552618 0.378058 -> 0.552618 
 37 R E 0.055337 0.316710 0.627953 -> 0.627953 
 38 R M 0.210744 0.622362 0.166894 -> 0.622362 
 39 D E 0.025261 0.163096 0.811643 -> 0.811643 
 40 K E 0.002203 0.064019 0.933778 -> 0.933778 
 41 G E 0.079599 0.392539 0.527862 -> 0.527862 
 42 T E 0.076226 0.350552 0.573223 -> 0.573223 
 43 Y B 0.615210 0.356509 0.028280 -> 0.615210 
 44 Q M 0.101788 0.487660 0.410552 -> 0.487660 
 45 Y M 0.206805 0.613970 0.179225 -> 0.613970 
 46 D M 0.129100 0.619307 0.251592 -> 0.619307 
 47 Q E 0.052495 0.346782 0.600723 -> 0.600723 
 48 D B 0.596586 0.326255 0.077159 -> 0.596586 
 49 Q E 0.283154 0.309065 0.407781 -> 0.407781 
 50 D B 0.421029 0.378747 0.200224 -> 0.421029 
 51 G B 0.787735 0.166669 0.045596 -> 0.787735 
 52 R M 0.148671 0.674526 0.176803 -> 0.674526 
 53 F B 0.804666 0.175714 0.019620 -> 0.804666 
 54 F B 0.707535 0.266141 0.026324 -> 0.707535 
 55 I B 0.945215 0.050808 0.003977 -> 0.945215 
 56 R M 0.348880 0.567775 0.083344 -> 0.567775 
 57 C B 0.761879 0.210106 0.028015 -> 0.761879 
 58 S M 0.353796 0.500016 0.146188 -> 0.500016 
 59 D E 0.127768 0.356358 0.515874 -> 0.515874 
 60 C M 0.330161 0.472746 0.197093 -> 0.472746 
 61 N E 0.010710 0.150888 0.838402 -> 0.838402 
 62 D M 0.139291 0.592364 0.268345 -> 0.592364 
 63 P E 0.041323 0.228158 0.730519 -> 0.730519 
 64 D E 0.029103 0.196744 0.774152 -> 0.774152 
 65 T M 0.377937 0.530778 0.091285 -> 0.530778 
 66 E M 0.210004 0.515121 0.274875 -> 0.515121 
 67 A B 0.854205 0.120264 0.025531 -> 0.854205 
 68 D M 0.367722 0.523393 0.108885 -> 0.523393 
 69 Y B 0.702504 0.272775 0.024721 -> 0.702504 
 70 Y B 0.860414 0.130824 0.008762 -> 0.860414 
 71 I B 0.589645 0.373489 0.036865 -> 0.589645 
 72 V B 0.964281 0.032307 0.003412 -> 0.964281 
 73 H B 0.552530 0.401680 0.045791 -> 0.552530 
 74 F B 0.965269 0.030081 0.004649 -> 0.965269 
 75 T M 0.274370 0.650013 0.075617 -> 0.650013 
 76 L B 0.897260 0.097171 0.005569 -> 0.897260 
 77 A E 0.041106 0.401047 0.557847 -> 0.557847 
 78 C M 0.341336 0.473027 0.185636 -> 0.473027 
 79 D E 0.027036 0.291155 0.681809 -> 0.681809 
 80 P E 0.012291 0.138618 0.849091 -> 0.849091 
 81 L M 0.369103 0.548613 0.082284 -> 0.548613 
 82 P E 0.022734 0.173987 0.803279 -> 0.803279 
 83 D E 0.002475 0.044955 0.952570 -> 0.952570 
 84 G M 0.152894 0.609200 0.237906 -> 0.609200 
 85 S E 0.047644 0.471412 0.480945 -> 0.480945 
 86 V B 0.876060 0.121308 0.002632 -> 0.876060 
 87 Y B 0.543943 0.438267 0.017790 -> 0.543943 
 88 L B 0.974967 0.022788 0.002244 -> 0.974967 
 89 N B 0.783515 0.199390 0.017096 -> 0.783515 
 90 G B 0.961973 0.035968 0.002059 -> 0.961973 
 91 E M 0.360500 0.572060 0.067440 -> 0.572060 
 92 L B 0.948087 0.046763 0.005150 -> 0.948087 
 93 F B 0.639709 0.320775 0.039516 -> 0.639709 
 94 N B 0.482312 0.397761 0.119927 -> 0.482312 
 95 N M 0.375728 0.435567 0.188705 -> 0.435567 
 96 V M 0.198945 0.553816 0.247239 -> 0.553816 
 97 L B 0.525237 0.391921 0.082842 -> 0.525237 
 98 D M 0.049190 0.511469 0.439341 -> 0.511469 
 99 E E 0.003559 0.075854 0.920586 -> 0.920586 
 100 K E 0.003870 0.063759 0.932371 -> 0.932371 
 101 S M 0.300414 0.586329 0.113257 -> 0.586329 
 102 K E 0.021822 0.309051 0.669127 -> 0.669127 
 103 M B 0.685941 0.289658 0.024401 -> 0.685941 
 104 G M 0.109004 0.530862 0.360134 -> 0.530862 
 105 Y M 0.380506 0.561828 0.057665 -> 0.561828 
 106 N M 0.263737 0.623152 0.113112 -> 0.623152 
 107 F E 0.040707 0.278434 0.680859 -> 0.680859 
 108 E E 0.000631 0.049950 0.949419 -> 0.949419 
 109 T E 0.041297 0.321737 0.636966 -> 0.636966 
 110 K E 0.010620 0.149453 0.839927 -> 0.839927 
 111 Q M 0.254777 0.656523 0.088700 -> 0.656523 
 112 Y B 0.666427 0.303262 0.030312 -> 0.666427 
 113 E M 0.261555 0.599808 0.138637 -> 0.599808 
 114 K M 0.259356 0.477719 0.262925 -> 0.477719 
 115 A B 0.512744 0.399199 0.088057 -> 0.512744 
 116 V B 0.739208 0.229255 0.031538 -> 0.739208 
 117 L B 0.511638 0.412158 0.076204 -> 0.511638 
 118 L B 0.957491 0.032286 0.010222 -> 0.957491 
 119 K B 0.577603 0.309552 0.112844 -> 0.577603 
 120 Q B 0.780833 0.158425 0.060742 -> 0.780833 
 121 G B 0.747905 0.194785 0.057310 -> 0.747905 
 122 S B 0.798669 0.168676 0.032655 -> 0.798669 
 123 Y B 0.563099 0.374093 0.062808 -> 0.563099 
 124 N B 0.621503 0.320651 0.057846 -> 0.621503 
 125 Y B 0.677669 0.296920 0.025411 -> 0.677669 
 126 Q M 0.461454 0.463864 0.074681 -> 0.463864 
 127 Y B 0.728396 0.248574 0.023030 -> 0.728396 
 128 L B 0.927639 0.066072 0.006289 -> 0.927639 
 129 F B 0.765803 0.215768 0.018429 -> 0.765803 
 130 V B 0.614984 0.348984 0.036032 -> 0.614984 
 131 P M 0.158798 0.635979 0.205223 -> 0.635979 
 132 T E 0.004932 0.084331 0.910737 -> 0.910737 
 133 G E 0.014934 0.070483 0.914583 -> 0.914583 
 134 S E 0.033037 0.325896 0.641067 -> 0.641067 
 135 S E 0.023445 0.168736 0.807819 -> 0.807819 
 136 V E 0.058516 0.408301 0.533183 -> 0.533183 
 137 G E 0.115548 0.424698 0.459754 -> 0.459754 
 138 Q E 0.027313 0.219339 0.753348 -> 0.753348 
 139 T E 0.031465 0.228712 0.739823 -> 0.739823 
 140 G E 0.127474 0.355883 0.516643 -> 0.516643 
 141 P E 0.054933 0.270552 0.674514 -> 0.674514 
 142 I M 0.226248 0.415206 0.358546 -> 0.415206 
 143 E E 0.027707 0.167877 0.804416 -> 0.804416 
 144 G E 0.004685 0.052490 0.942824 -> 0.942824 
