# Supplementary material for: AcconPred: Predicting Solvent Accessibility and Contact Number Simultaneously by a Multitask Learning Framework under the Conditional Neural Fields Model
Source: Biomed Res Int. 2015 Aug 3;2015:678764. doi: 10.1155/2015/678764 (PMC4538422; doi:10.1155/2015/678764)
Supplement: Supplementary file 1 — Training/testing dataset as well as the CASP11 evaluation dataset could be found in the Supplementary Material. The CASP11 evaluation dataset contains all detailed results from SPINE-X, SANN, ACCpro5 and AcconPred. [file 678764.f1.zip › Supplmentary_Files/105_casp11_domain/casp11_domain_AcconPred/T0815-D1.reso]

# AcconPred: three-state solvent accessibility prediction results 
# probabilities are in the order of B (Bury, pACC: 0-10), M (Medium, pACC: 11-40) and E (Exposed, pACC: 41-100), 
# where pACC is the relative solvent accessibility value calculated by DSSP 
# output format: <position> <one letter amino acid> <predicted label> ... <probabilities> ... -> <maximal probability> 

 1 M E 0.015489 0.078526 0.905985 -> 0.905985 
 2 D E 0.008043 0.150069 0.841888 -> 0.841888 
 3 L M 0.161337 0.679400 0.159263 -> 0.679400 
 4 P E 0.025165 0.331158 0.643677 -> 0.643677 
 5 D E 0.010597 0.188068 0.801335 -> 0.801335 
 6 I B 0.496125 0.449215 0.054660 -> 0.496125 
 7 V B 0.923620 0.063117 0.013263 -> 0.923620 
 8 N M 0.028435 0.557288 0.414278 -> 0.557288 
 9 M M 0.192445 0.656562 0.150992 -> 0.656562 
 10 Y B 0.849306 0.142566 0.008128 -> 0.849306 
 11 F B 0.771968 0.215226 0.012806 -> 0.771968 
 12 D E 0.026192 0.356695 0.617113 -> 0.617113 
 13 A B 0.715205 0.233895 0.050899 -> 0.715205 
 14 D B 0.474363 0.346883 0.178754 -> 0.474363 
 15 S M 0.118859 0.444905 0.436235 -> 0.444905 
 16 C M 0.216216 0.526335 0.257448 -> 0.526335 
 17 N E 0.018500 0.248918 0.732583 -> 0.732583 
 18 D M 0.267095 0.605427 0.127478 -> 0.605427 
 19 T B 0.521188 0.424896 0.053915 -> 0.521188 
 20 D E 0.012203 0.226220 0.761577 -> 0.761577 
 21 A M 0.397680 0.544580 0.057741 -> 0.544580 
 22 L B 0.989574 0.007756 0.002670 -> 0.989574 
 23 S B 0.655203 0.295952 0.048846 -> 0.655203 
 24 E E 0.022773 0.235082 0.742144 -> 0.742144 
 25 T B 0.641905 0.331427 0.026669 -> 0.641905 
 26 F B 0.869662 0.126054 0.004284 -> 0.869662 
 27 A B 0.849338 0.136016 0.014645 -> 0.849338 
 28 P E 0.060656 0.309377 0.629967 -> 0.629967 
 29 D M 0.094863 0.545229 0.359908 -> 0.545229 
 30 A B 0.831086 0.164022 0.004892 -> 0.831086 
 31 V M 0.101460 0.636134 0.262406 -> 0.636134 
 32 V B 0.545991 0.436105 0.017903 -> 0.545991 
 33 E M 0.057030 0.618795 0.324175 -> 0.618795 
 34 D M 0.128225 0.602867 0.268908 -> 0.602867 
 35 E E 0.008453 0.160713 0.830834 -> 0.830834 
 36 G E 0.020896 0.131184 0.847920 -> 0.847920 
 37 A M 0.093830 0.494165 0.412005 -> 0.494165 
 38 R E 0.009081 0.174493 0.816426 -> 0.816426 
 39 H M 0.309931 0.598283 0.091786 -> 0.598283 
 40 Q E 0.028322 0.285141 0.686536 -> 0.686536 
 41 G M 0.385838 0.446703 0.167460 -> 0.446703 
 42 V M 0.340317 0.622411 0.037272 -> 0.622411 
 43 V E 0.026000 0.219859 0.754141 -> 0.754141 
 44 A B 0.523806 0.425662 0.050532 -> 0.523806 
 45 I B 0.983297 0.008160 0.008543 -> 0.983297 
 46 L M 0.246629 0.656604 0.096767 -> 0.656604 
 47 R E 0.008889 0.208049 0.783062 -> 0.783062 
 48 W B 0.684426 0.303702 0.011872 -> 0.684426 
 49 W B 0.800710 0.189558 0.009732 -> 0.800710 
 50 V M 0.103991 0.462451 0.433558 -> 0.462451 
 51 A M 0.078059 0.476163 0.445778 -> 0.476163 
 52 A B 0.713508 0.246056 0.040437 -> 0.713508 
 53 K E 0.070534 0.436992 0.492474 -> 0.492474 
 54 K E 0.005071 0.064043 0.930886 -> 0.930886 
 55 A E 0.164539 0.300826 0.534634 -> 0.534634 
 56 A M 0.333926 0.446689 0.219385 -> 0.446689 
 57 S E 0.028629 0.252365 0.719005 -> 0.719005 
 58 Y M 0.277921 0.607571 0.114508 -> 0.607571 
 59 V M 0.092990 0.521905 0.385105 -> 0.521905 
 60 A B 0.535302 0.377362 0.087336 -> 0.535302 
 61 E E 0.021193 0.422012 0.556795 -> 0.556795 
 62 P M 0.213161 0.466300 0.320539 -> 0.466300 
 63 L M 0.085913 0.520232 0.393855 -> 0.520232 
 64 E E 0.036921 0.349873 0.613206 -> 0.613206 
 65 S M 0.325068 0.562546 0.112386 -> 0.562546 
 66 T M 0.171076 0.599611 0.229314 -> 0.599611 
 67 V M 0.106795 0.465007 0.428197 -> 0.465007 
 68 D E 0.032717 0.380206 0.587077 -> 0.587077 
 69 G E 0.012374 0.102809 0.884817 -> 0.884817 
 70 D E 0.055775 0.382165 0.562060 -> 0.562060 
 71 K M 0.084580 0.690452 0.224968 -> 0.690452 
 72 A B 0.964126 0.034516 0.001358 -> 0.964126 
 73 L B 0.882207 0.114610 0.003183 -> 0.882207 
 74 V B 0.989490 0.009449 0.001061 -> 0.989490 
 75 R M 0.316617 0.629759 0.053624 -> 0.629759 
 76 A B 0.939746 0.058363 0.001891 -> 0.939746 
 77 K M 0.074404 0.752439 0.173157 -> 0.752439 
 78 V B 0.904790 0.091082 0.004128 -> 0.904790 
 79 S M 0.093451 0.627048 0.279501 -> 0.627048 
 80 G B 0.523689 0.349869 0.126442 -> 0.523689 
 81 R E 0.013253 0.325054 0.661693 -> 0.661693 
 82 F M 0.401495 0.527011 0.071493 -> 0.527011 
 83 P E 0.012389 0.110965 0.876645 -> 0.876645 
 84 G E 0.025495 0.143289 0.831215 -> 0.831215 
 85 S M 0.398225 0.493748 0.108027 -> 0.493748 
 86 P E 0.038423 0.344037 0.617539 -> 0.617539 
 87 V B 0.812631 0.184331 0.003038 -> 0.812631 
 88 T M 0.335722 0.592888 0.071390 -> 0.592888 
 89 L B 0.862842 0.134474 0.002684 -> 0.862842 
 90 T B 0.782279 0.205238 0.012483 -> 0.782279 
 91 Y B 0.757723 0.236780 0.005497 -> 0.757723 
 92 S B 0.791880 0.201497 0.006622 -> 0.791880 
 93 F B 0.981118 0.017855 0.001028 -> 0.981118 
 94 T M 0.161591 0.766662 0.071747 -> 0.766662 
 95 I B 0.969061 0.029980 0.000959 -> 0.969061 
 96 K E 0.007576 0.308583 0.683841 -> 0.683841 
 97 D E 0.021714 0.173332 0.804953 -> 0.804953 
 98 G E 0.075091 0.339818 0.585091 -> 0.585091 
 99 R M 0.081615 0.592740 0.325644 -> 0.592740 
 100 I B 0.797005 0.189585 0.013410 -> 0.797005 
 101 A B 0.480307 0.459357 0.060336 -> 0.480307 
 102 R M 0.063449 0.544693 0.391857 -> 0.544693 
 103 L B 0.592965 0.352302 0.054733 -> 0.592965 
 104 E M 0.037772 0.575239 0.386988 -> 0.575239 
 105 I B 0.559900 0.376481 0.063620 -> 0.559900 
 106 Q E 0.003014 0.059640 0.937346 -> 0.937346 
