# Supplementary material for: AcconPred: Predicting Solvent Accessibility and Contact Number Simultaneously by a Multitask Learning Framework under the Conditional Neural Fields Model
Source: Biomed Res Int. 2015 Aug 3;2015:678764. doi: 10.1155/2015/678764 (PMC4538422; doi:10.1155/2015/678764)
Supplement: Supplementary file 1 — Training/testing dataset as well as the CASP11 evaluation dataset could be found in the Supplementary Material. The CASP11 evaluation dataset contains all detailed results from SPINE-X, SANN, ACCpro5 and AcconPred. [file 678764.f1.zip › Supplmentary_Files/105_casp11_domain/casp11_domain_AcconPred/T0816-D1.reso]

# AcconPred: three-state solvent accessibility prediction results 
# probabilities are in the order of B (Bury, pACC: 0-10), M (Medium, pACC: 11-40) and E (Exposed, pACC: 41-100), 
# where pACC is the relative solvent accessibility value calculated by DSSP 
# output format: <position> <one letter amino acid> <predicted label> ... <probabilities> ... -> <maximal probability> 

 1 M E 0.013389 0.047416 0.939195 -> 0.939195 
 2 I M 0.125406 0.449517 0.425077 -> 0.449517 
 3 T E 0.040307 0.323223 0.636470 -> 0.636470 
 4 Y M 0.227183 0.526766 0.246051 -> 0.526766 
 5 K E 0.006247 0.201781 0.791972 -> 0.791972 
 6 K E 0.001044 0.088022 0.910934 -> 0.910934 
 7 L B 0.775600 0.191477 0.032923 -> 0.775600 
 8 L B 0.662484 0.308525 0.028991 -> 0.662484 
 9 D E 0.008488 0.222442 0.769070 -> 0.769070 
 10 E E 0.018320 0.437955 0.543725 -> 0.543725 
 11 L B 0.877032 0.112558 0.010410 -> 0.877032 
 12 K M 0.015322 0.508040 0.476638 -> 0.508040 
 13 K E 0.001044 0.052235 0.946721 -> 0.946721 
 14 E E 0.008802 0.275365 0.715833 -> 0.715833 
 15 I B 0.502305 0.417110 0.080586 -> 0.502305 
 16 G M 0.328223 0.504399 0.167378 -> 0.504399 
 17 P E 0.074919 0.362993 0.562088 -> 0.562088 
 18 I B 0.601704 0.325951 0.072345 -> 0.601704 
 19 A B 0.667116 0.277637 0.055247 -> 0.667116 
 20 K E 0.016013 0.339268 0.644719 -> 0.644719 
 21 I M 0.279208 0.516481 0.204311 -> 0.516481 
 22 F B 0.800351 0.177031 0.022618 -> 0.800351 
 23 L B 0.751124 0.224709 0.024166 -> 0.751124 
 24 N M 0.126470 0.555419 0.318111 -> 0.555419 
 25 K E 0.033156 0.445980 0.520865 -> 0.520865 
 26 A B 0.740656 0.209927 0.049417 -> 0.740656 
 27 M B 0.656033 0.277843 0.066124 -> 0.656033 
 28 E E 0.003474 0.089555 0.906971 -> 0.906971 
 29 S E 0.040545 0.260211 0.699243 -> 0.699243 
 30 L M 0.386813 0.559200 0.053987 -> 0.559200 
 31 G E 0.056263 0.245892 0.697845 -> 0.697845 
 32 Y M 0.155188 0.677941 0.166871 -> 0.677941 
 33 D E 0.016689 0.198991 0.784320 -> 0.784320 
 34 D E 0.018935 0.201426 0.779639 -> 0.779639 
 35 V M 0.272070 0.559456 0.168474 -> 0.559456 
 36 D E 0.012951 0.168338 0.818711 -> 0.818711 
 37 D E 0.015025 0.203210 0.781765 -> 0.781765 
 38 S E 0.021211 0.176498 0.802291 -> 0.802291 
 39 N M 0.085457 0.565696 0.348847 -> 0.565696 
 40 Y M 0.429674 0.499624 0.070703 -> 0.499624 
 41 K E 0.006596 0.191988 0.801415 -> 0.801415 
 42 E M 0.039920 0.513799 0.446280 -> 0.513799 
 43 I B 0.893981 0.074436 0.031583 -> 0.893981 
 44 L B 0.643913 0.311223 0.044863 -> 0.643913 
 45 S M 0.187840 0.507922 0.304238 -> 0.507922 
 46 V B 0.608375 0.328421 0.063204 -> 0.608375 
 47 L B 0.601672 0.341568 0.056760 -> 0.601672 
 48 K E 0.005338 0.202152 0.792510 -> 0.792510 
 49 M M 0.315158 0.464056 0.220786 -> 0.464056 
 50 N M 0.269759 0.623888 0.106353 -> 0.623888 
 51 K E 0.002846 0.093527 0.903627 -> 0.903627 
 52 E E 0.021958 0.370700 0.607342 -> 0.607342 
 53 L B 0.921095 0.067363 0.011542 -> 0.921095 
 54 R M 0.018696 0.498260 0.483044 -> 0.498260 
 55 E E 0.017420 0.322521 0.660059 -> 0.660059 
 56 Y B 0.578939 0.393906 0.027154 -> 0.578939 
 57 V B 0.791558 0.195292 0.013150 -> 0.791558 
 58 E E 0.009161 0.280510 0.710330 -> 0.710330 
 59 I M 0.279014 0.555845 0.165141 -> 0.555845 
 60 V B 0.877551 0.107513 0.014936 -> 0.877551 
 61 E M 0.044303 0.621951 0.333747 -> 0.621951 
 62 E E 0.009847 0.175834 0.814319 -> 0.814319 
 63 R M 0.129730 0.655176 0.215094 -> 0.655176 
 64 L M 0.296350 0.499770 0.203880 -> 0.499770 
 65 E E 0.004033 0.092552 0.903416 -> 0.903416 
 66 K E 0.000945 0.045012 0.954043 -> 0.954043 
 67 E E 0.004499 0.093862 0.901639 -> 0.901639 
 68 G E 0.000873 0.016439 0.982689 -> 0.982689 
