# Supplementary material for: AcconPred: Predicting Solvent Accessibility and Contact Number Simultaneously by a Multitask Learning Framework under the Conditional Neural Fields Model
Source: Biomed Res Int. 2015 Aug 3;2015:678764. doi: 10.1155/2015/678764 (PMC4538422; doi:10.1155/2015/678764)
Supplement: Supplementary file 1 — Training/testing dataset as well as the CASP11 evaluation dataset could be found in the Supplementary Material. The CASP11 evaluation dataset contains all detailed results from SPINE-X, SANN, ACCpro5 and AcconPred. [file 678764.f1.zip › Supplmentary_Files/105_casp11_domain/casp11_domain_AcconPred/T0817-D1.reso]

# AcconPred: three-state solvent accessibility prediction results 
# probabilities are in the order of B (Bury, pACC: 0-10), M (Medium, pACC: 11-40) and E (Exposed, pACC: 41-100), 
# where pACC is the relative solvent accessibility value calculated by DSSP 
# output format: <position> <one letter amino acid> <predicted label> ... <probabilities> ... -> <maximal probability> 

 1 G E 0.014938 0.079702 0.905360 -> 0.905360 
 2 T E 0.034699 0.426343 0.538958 -> 0.538958 
 3 L B 0.901582 0.097675 0.000743 -> 0.901582 
 4 R M 0.098670 0.715679 0.185652 -> 0.715679 
 5 V B 0.940274 0.058762 0.000964 -> 0.940274 
 6 A B 0.808317 0.169991 0.021692 -> 0.808317 
 7 I B 0.791982 0.182204 0.025814 -> 0.791982 
 8 A B 0.549813 0.355400 0.094787 -> 0.549813 
 9 K E 0.040041 0.417007 0.542953 -> 0.542953 
 10 P E 0.061572 0.387819 0.550609 -> 0.550609 
 11 A B 0.620469 0.330113 0.049418 -> 0.620469 
 12 G E 0.049412 0.306011 0.644577 -> 0.644577 
 13 N M 0.202315 0.512407 0.285277 -> 0.512407 
 14 L B 0.809820 0.174662 0.015518 -> 0.809820 
 15 D B 0.561797 0.386072 0.052131 -> 0.561797 
 16 P B 0.790404 0.162556 0.047040 -> 0.790404 
 17 Q B 0.662822 0.258663 0.078515 -> 0.662822 
 18 S B 0.606033 0.308656 0.085311 -> 0.606033 
 19 H B 0.426745 0.385330 0.187924 -> 0.426745 
 20 Y M 0.257649 0.553246 0.189106 -> 0.553246 
 21 A B 0.729973 0.225630 0.044397 -> 0.729973 
 22 I B 0.806632 0.179897 0.013471 -> 0.806632 
 23 W B 0.448879 0.438929 0.112192 -> 0.448879 
 24 A B 0.558993 0.359888 0.081119 -> 0.558993 
 25 I B 0.967579 0.024432 0.007989 -> 0.967579 
 26 Q B 0.883527 0.105677 0.010796 -> 0.883527 
 27 D M 0.306032 0.583056 0.110912 -> 0.583056 
 28 L B 0.708347 0.272613 0.019040 -> 0.708347 
 29 M B 0.878586 0.103942 0.017472 -> 0.878586 
 30 F B 0.584398 0.368141 0.047461 -> 0.584398 
 31 E M 0.288442 0.521308 0.190250 -> 0.521308 
 32 P B 0.450322 0.398181 0.151498 -> 0.450322 
 33 L B 0.902621 0.091809 0.005570 -> 0.902621 
 34 V B 0.815584 0.175850 0.008567 -> 0.815584 
 35 K E 0.055486 0.471210 0.473304 -> 0.473304 
 36 Y M 0.219785 0.653484 0.126731 -> 0.653484 
 37 G M 0.328192 0.539748 0.132060 -> 0.539748 
 38 K E 0.005235 0.072253 0.922511 -> 0.922511 
 39 G E 0.004031 0.051271 0.944699 -> 0.944699 
 40 G M 0.105656 0.529718 0.364626 -> 0.529718 
 41 Q E 0.016257 0.154563 0.829180 -> 0.829180 
 42 I B 0.505974 0.467975 0.026051 -> 0.505974 
 43 E M 0.084080 0.675882 0.240037 -> 0.675882 
 44 P B 0.439781 0.421258 0.138961 -> 0.439781 
 45 C B 0.497145 0.409866 0.092990 -> 0.497145 
 46 L B 0.855093 0.130394 0.014513 -> 0.855093 
 47 A B 0.869020 0.120332 0.010648 -> 0.869020 
 48 T E 0.055491 0.472203 0.472306 -> 0.472306 
 49 D E 0.029523 0.307937 0.662541 -> 0.662541 
 50 W M 0.389184 0.566795 0.044021 -> 0.566795 
 51 K E 0.001627 0.082657 0.915715 -> 0.915715 
 52 I M 0.099804 0.674421 0.225775 -> 0.674421 
 53 E E 0.021010 0.437142 0.541848 -> 0.541848 
 54 D E 0.006916 0.032502 0.960582 -> 0.960582 
 55 G E 0.013724 0.085646 0.900630 -> 0.900630 
 56 G E 0.044427 0.309441 0.646132 -> 0.646132 
 57 K M 0.045149 0.481182 0.473669 -> 0.481182 
 58 T M 0.220417 0.609215 0.170368 -> 0.609215 
 59 L B 0.948201 0.048639 0.003160 -> 0.948201 
 60 H M 0.107844 0.792705 0.099450 -> 0.792705 
 61 L B 0.984870 0.012937 0.002193 -> 0.984870 
 62 T M 0.093265 0.774064 0.132671 -> 0.774064 
 63 L B 0.968852 0.029569 0.001579 -> 0.968852 
 64 R M 0.090680 0.835715 0.073605 -> 0.835715 
 65 E E 0.006311 0.085034 0.908655 -> 0.908655 
 66 G E 0.008741 0.157352 0.833907 -> 0.833907 
 67 V B 0.691424 0.302837 0.005740 -> 0.691424 
 68 K E 0.017040 0.405142 0.577818 -> 0.577818 
 69 F B 0.630305 0.356317 0.013378 -> 0.630305 
 70 Q M 0.162534 0.560818 0.276648 -> 0.560818 
 71 D E 0.045050 0.347944 0.607006 -> 0.607006 
 72 G M 0.213294 0.472700 0.314006 -> 0.472700 
 73 T E 0.005527 0.135958 0.858515 -> 0.858515 
 74 K E 0.001840 0.061335 0.936825 -> 0.936825 
 75 F B 0.919812 0.079349 0.000838 -> 0.919812 
 76 D M 0.067347 0.688062 0.244591 -> 0.688062 
 77 A B 0.779448 0.199855 0.020696 -> 0.779448 
 78 A M 0.106445 0.588884 0.304671 -> 0.588884 
 79 A B 0.905774 0.087353 0.006873 -> 0.905774 
 80 C B 0.985386 0.012390 0.002225 -> 0.985386 
 81 K M 0.175785 0.732446 0.091769 -> 0.732446 
 82 W B 0.493146 0.465708 0.041145 -> 0.493146 
 83 N B 0.967260 0.026256 0.006483 -> 0.967260 
 84 L B 0.955211 0.043279 0.001510 -> 0.955211 
 85 E M 0.120763 0.655279 0.223958 -> 0.655279 
 86 R M 0.297331 0.577167 0.125503 -> 0.577167 
 87 W B 0.844158 0.146022 0.009820 -> 0.844158 
 88 M M 0.259694 0.628089 0.112217 -> 0.628089 
 89 G E 0.054976 0.264015 0.681009 -> 0.681009 
 90 I M 0.160870 0.509276 0.329855 -> 0.509276 
 91 D E 0.045248 0.193738 0.761013 -> 0.761013 
 92 Q E 0.047394 0.302916 0.649691 -> 0.649691 
 93 F M 0.326745 0.433090 0.240165 -> 0.433090 
 94 S E 0.180827 0.390227 0.428946 -> 0.428946 
 95 W M 0.277764 0.494779 0.227458 -> 0.494779 
 96 M M 0.290303 0.478297 0.231400 -> 0.478297 
 97 N E 0.096544 0.309419 0.594037 -> 0.594037 
 98 C B 0.454943 0.432877 0.112180 -> 0.454943 
 99 S B 0.420032 0.383135 0.196833 -> 0.420032 
 100 K E 0.017609 0.161403 0.820987 -> 0.820987 
 101 H M 0.107955 0.526111 0.365934 -> 0.526111 
 102 F B 0.768748 0.219825 0.011426 -> 0.768748 
 103 Q E 0.012573 0.236887 0.750540 -> 0.750540 
 104 S M 0.077489 0.556615 0.365896 -> 0.556615 
 105 L M 0.479529 0.504692 0.015778 -> 0.504692 
 106 E E 0.016592 0.384613 0.598795 -> 0.598795 
 107 V M 0.149300 0.573354 0.277346 -> 0.573354 
 108 V E 0.029562 0.345514 0.624925 -> 0.624925 
 109 D M 0.121460 0.562673 0.315867 -> 0.562673 
 110 D E 0.007405 0.076365 0.916230 -> 0.916230 
 111 Y M 0.097204 0.662681 0.240114 -> 0.662681 
 112 H M 0.057461 0.620084 0.322455 -> 0.620084 
 113 I B 0.975996 0.022034 0.001970 -> 0.975996 
 114 T M 0.220972 0.709744 0.069284 -> 0.709744 
 115 V B 0.980812 0.018538 0.000651 -> 0.980812 
 116 H M 0.048165 0.778079 0.173756 -> 0.778079 
 117 F B 0.960043 0.038172 0.001785 -> 0.960043 
 118 K E 0.005176 0.199723 0.795102 -> 0.795102 
 119 E E 0.068009 0.412673 0.519318 -> 0.519318 
 120 P M 0.301730 0.454059 0.244211 -> 0.454059 
 121 V B 0.544988 0.386272 0.068740 -> 0.544988 
 122 L M 0.392131 0.421904 0.185964 -> 0.421904 
 123 A M 0.220533 0.418928 0.360540 -> 0.418928 
 124 L B 0.909890 0.070288 0.019822 -> 0.909890 
 125 M B 0.758172 0.224432 0.017396 -> 0.758172 
 126 Q M 0.236474 0.449551 0.313975 -> 0.449551 
 127 E M 0.420695 0.500095 0.079210 -> 0.500095 
 128 L B 0.956332 0.038044 0.005625 -> 0.956332 
 129 S B 0.855311 0.122772 0.021917 -> 0.855311 
 130 Y M 0.367719 0.478045 0.154236 -> 0.478045 
 131 T B 0.689482 0.207619 0.102899 -> 0.689482 
 132 R B 0.479357 0.410277 0.110365 -> 0.479357 
 133 P B 0.731585 0.215550 0.052865 -> 0.731585 
 134 T B 0.713652 0.225486 0.060862 -> 0.713652 
 135 R M 0.334956 0.454194 0.210850 -> 0.454194 
 136 F B 0.555403 0.375374 0.069223 -> 0.555403 
 137 L B 0.566839 0.381899 0.051262 -> 0.566839 
 138 S M 0.328828 0.547286 0.123885 -> 0.547286 
 139 P E 0.118435 0.369651 0.511914 -> 0.511914 
 140 K E 0.007072 0.099720 0.893208 -> 0.893208 
 141 S M 0.321870 0.429461 0.248669 -> 0.429461 
 142 V B 0.481468 0.418334 0.100198 -> 0.481468 
 143 D E 0.028287 0.294027 0.677687 -> 0.677687 
 144 A E 0.052827 0.223694 0.723479 -> 0.723479 
 145 D E 0.012287 0.129988 0.857724 -> 0.857724 
 146 G E 0.060948 0.322172 0.616880 -> 0.616880 
 147 K E 0.011491 0.182264 0.806245 -> 0.806245 
 148 F M 0.330328 0.495125 0.174547 -> 0.495125 
 149 K E 0.009830 0.182439 0.807731 -> 0.807731 
 150 E E 0.024694 0.259504 0.715803 -> 0.715803 
 151 P M 0.378912 0.453475 0.167613 -> 0.453475 
 152 V B 0.640626 0.296027 0.063347 -> 0.640626 
 153 G B 0.832570 0.136202 0.031228 -> 0.832570 
 154 T B 0.751281 0.202324 0.046394 -> 0.751281 
 155 G B 0.739537 0.209758 0.050705 -> 0.739537 
 156 P B 0.625786 0.317079 0.057135 -> 0.625786 
 157 W B 0.824729 0.162665 0.012606 -> 0.824729 
 158 V M 0.139979 0.639054 0.220967 -> 0.639054 
 159 Q M 0.321544 0.538450 0.140006 -> 0.538450 
 160 I M 0.095173 0.635289 0.269538 -> 0.635289 
 161 S E 0.041159 0.353119 0.605721 -> 0.605721 
 162 A M 0.392578 0.535573 0.071849 -> 0.535573 
 163 D E 0.009369 0.196242 0.794389 -> 0.794389 
 164 D E 0.013698 0.106458 0.879844 -> 0.879844 
 165 T E 0.068168 0.385939 0.545893 -> 0.545893 
 166 Q M 0.058475 0.580595 0.360930 -> 0.580595 
 167 S B 0.738837 0.239426 0.021737 -> 0.738837 
 168 V M 0.269441 0.666585 0.063974 -> 0.666585 
 169 F B 0.865127 0.122939 0.011935 -> 0.865127 
 170 E M 0.101669 0.598447 0.299884 -> 0.598447 
 171 H M 0.136532 0.537031 0.326437 -> 0.537031 
 172 Y M 0.282925 0.632761 0.084313 -> 0.632761 
 173 D E 0.020301 0.175540 0.804159 -> 0.804159 
 174 G E 0.058791 0.358120 0.583088 -> 0.583088 
 175 Y B 0.586550 0.373477 0.039973 -> 0.586550 
 176 W M 0.135397 0.517414 0.347189 -> 0.517414 
 177 G E 0.070915 0.347277 0.581808 -> 0.581808 
 178 D E 0.005481 0.094911 0.899609 -> 0.899609 
 179 K E 0.003232 0.109584 0.887184 -> 0.887184 
 180 P M 0.309504 0.546981 0.143515 -> 0.546981 
 181 T E 0.052555 0.444987 0.502458 -> 0.502458 
 182 Y B 0.577865 0.406110 0.016026 -> 0.577865 
 183 E E 0.010653 0.255387 0.733960 -> 0.733960 
 184 R M 0.045393 0.716893 0.237714 -> 0.716893 
 185 L B 0.970865 0.026719 0.002417 -> 0.970865 
 186 E M 0.085597 0.686873 0.227530 -> 0.686873 
 187 A B 0.780356 0.212457 0.007187 -> 0.780356 
 188 K M 0.043155 0.688466 0.268380 -> 0.688466 
 189 V M 0.221168 0.520397 0.258435 -> 0.520397 
 190 I B 0.671123 0.304977 0.023900 -> 0.671123 
 191 P E 0.015601 0.173817 0.810582 -> 0.810582 
 192 D M 0.054858 0.616585 0.328557 -> 0.616585 
 193 A M 0.360083 0.395842 0.244075 -> 0.395842 
 194 R E 0.006684 0.194782 0.798535 -> 0.798535 
 195 S M 0.290145 0.458403 0.251452 -> 0.458403 
 196 R M 0.357303 0.538288 0.104409 -> 0.538288 
 197 V B 0.731709 0.250933 0.017358 -> 0.731709 
 198 A M 0.316148 0.463449 0.220403 -> 0.463449 
 199 A B 0.584758 0.361994 0.053248 -> 0.584758 
 200 L B 0.888050 0.089201 0.022749 -> 0.888050 
 201 R E 0.019239 0.362868 0.617892 -> 0.617892 
 202 A E 0.028729 0.199027 0.772244 -> 0.772244 
 203 G E 0.016469 0.245051 0.738480 -> 0.738480 
 204 E E 0.011947 0.303902 0.684151 -> 0.684151 
 205 I B 0.824530 0.168849 0.006621 -> 0.824530 
 206 D M 0.336918 0.565647 0.097435 -> 0.565647 
 207 L B 0.879034 0.112731 0.008235 -> 0.879034 
 208 V B 0.846899 0.136475 0.016626 -> 0.846899 
 209 G B 0.576977 0.356605 0.066418 -> 0.576977 
 210 G B 0.416387 0.363710 0.219902 -> 0.416387 
 211 F M 0.359215 0.427038 0.213747 -> 0.427038 
 212 W M 0.214864 0.477527 0.307609 -> 0.477527 
 213 I M 0.376511 0.379035 0.244454 -> 0.379035 
 214 A E 0.141737 0.346904 0.511359 -> 0.511359 
 215 P E 0.049453 0.239799 0.710749 -> 0.710749 
 216 L B 0.647955 0.337368 0.014677 -> 0.647955 
 217 T E 0.080066 0.443524 0.476409 -> 0.476409 
 218 P E 0.052358 0.385675 0.561967 -> 0.561967 
 219 E E 0.004969 0.093575 0.901456 -> 0.901456 
 220 E M 0.199265 0.688561 0.112175 -> 0.688561 
 221 G B 0.556837 0.420307 0.022855 -> 0.556837 
 222 K E 0.002855 0.073117 0.924028 -> 0.924028 
 223 Q E 0.015401 0.296201 0.688398 -> 0.688398 
 224 L B 0.799030 0.188399 0.012570 -> 0.799030 
 225 E E 0.007783 0.190958 0.801258 -> 0.801258 
 226 A E 0.001896 0.018694 0.979411 -> 0.979411 
 227 A M 0.052009 0.509943 0.438048 -> 0.509943 
 228 G E 0.017460 0.120348 0.862192 -> 0.862192 
 229 F M 0.349167 0.477206 0.173627 -> 0.477206 
 230 N M 0.365299 0.440627 0.194074 -> 0.440627 
 231 V M 0.171082 0.450322 0.378596 -> 0.450322 
 232 V M 0.243160 0.539159 0.217681 -> 0.539159 
 233 V M 0.268950 0.547433 0.183617 -> 0.547433 
 234 D E 0.081018 0.337287 0.581695 -> 0.581695 
 235 P M 0.325808 0.397184 0.277008 -> 0.397184 
 236 P B 0.405949 0.371303 0.222748 -> 0.405949 
 237 S B 0.633016 0.300480 0.066504 -> 0.633016 
 238 I B 0.762712 0.214418 0.022870 -> 0.762712 
 239 W B 0.674798 0.296838 0.028364 -> 0.674798 
 240 A B 0.914874 0.078268 0.006858 -> 0.914874 
 241 H B 0.767675 0.204087 0.028238 -> 0.767675 
 242 S B 0.769494 0.209123 0.021383 -> 0.769494 
 243 K B 0.438569 0.423165 0.138267 -> 0.438569 
 244 R M 0.286473 0.511250 0.202278 -> 0.511250 
 245 V B 0.500438 0.366419 0.133143 -> 0.500438 
 246 Q M 0.236095 0.442155 0.321750 -> 0.442155 
 247 G B 0.456505 0.267807 0.275688 -> 0.456505 
 248 F B 0.434809 0.397393 0.167798 -> 0.434809 
 249 T E 0.022904 0.230505 0.746592 -> 0.746592 
 250 S M 0.210233 0.492173 0.297595 -> 0.492173 
 251 P E 0.194683 0.341466 0.463851 -> 0.463851 
 252 V M 0.192984 0.478565 0.328451 -> 0.478565 
 253 T E 0.263917 0.300655 0.435428 -> 0.435428 
 254 E E 0.139391 0.393803 0.466807 -> 0.466807 
 255 Y M 0.123824 0.639242 0.236935 -> 0.639242 
 256 D E 0.171766 0.251508 0.576726 -> 0.576726 
 257 M B 0.449253 0.414518 0.136229 -> 0.449253 
 258 P E 0.188952 0.319500 0.491548 -> 0.491548 
 259 Y M 0.357322 0.534752 0.107926 -> 0.534752 
 260 E E 0.036844 0.269392 0.693764 -> 0.693764 
 261 N E 0.061394 0.307606 0.631000 -> 0.631000 
 262 I M 0.428010 0.430389 0.141601 -> 0.430389 
 263 V M 0.279976 0.458584 0.261440 -> 0.458584 
 264 L E 0.068458 0.250643 0.680898 -> 0.680898 
 265 A E 0.005237 0.113628 0.881135 -> 0.881135 
