# Supplementary material for: AcconPred: Predicting Solvent Accessibility and Contact Number Simultaneously by a Multitask Learning Framework under the Conditional Neural Fields Model
Source: Biomed Res Int. 2015 Aug 3;2015:678764. doi: 10.1155/2015/678764 (PMC4538422; doi:10.1155/2015/678764)
Supplement: Supplementary file 1 — Training/testing dataset as well as the CASP11 evaluation dataset could be found in the Supplementary Material. The CASP11 evaluation dataset contains all detailed results from SPINE-X, SANN, ACCpro5 and AcconPred. [file 678764.f1.zip › Supplmentary_Files/105_casp11_domain/casp11_domain_AcconPred/T0817-D2.reso]

# AcconPred: three-state solvent accessibility prediction results 
# probabilities are in the order of B (Bury, pACC: 0-10), M (Medium, pACC: 11-40) and E (Exposed, pACC: 41-100), 
# where pACC is the relative solvent accessibility value calculated by DSSP 
# output format: <position> <one letter amino acid> <predicted label> ... <probabilities> ... -> <maximal probability> 

 1 G E 0.013267 0.094368 0.892364 -> 0.892364 
 2 N E 0.053561 0.400355 0.546084 -> 0.546084 
 3 V M 0.259503 0.588998 0.151499 -> 0.588998 
 4 T B 0.677143 0.279609 0.043248 -> 0.677143 
 5 L B 0.662218 0.327930 0.009852 -> 0.662218 
 6 V B 0.929078 0.067282 0.003640 -> 0.929078 
 7 M B 0.957106 0.041967 0.000927 -> 0.957106 
 8 A B 0.945912 0.050339 0.003749 -> 0.945912 
 9 F B 0.970114 0.028116 0.001770 -> 0.970114 
 10 N B 0.862332 0.126756 0.010912 -> 0.862332 
 11 P B 0.625538 0.310271 0.064191 -> 0.625538 
 12 D E 0.015062 0.256060 0.728877 -> 0.728877 
 13 R E 0.019516 0.393855 0.586628 -> 0.586628 
 14 A E 0.051513 0.310507 0.637981 -> 0.637981 
 15 E E 0.011526 0.196173 0.792301 -> 0.792301 
 16 P B 0.511609 0.397481 0.090910 -> 0.511609 
 17 L B 0.854206 0.129164 0.016630 -> 0.854206 
 18 K E 0.003163 0.125102 0.871735 -> 0.871735 
 19 D M 0.133688 0.791115 0.075197 -> 0.791115 
 20 P M 0.076446 0.495633 0.427921 -> 0.495633 
 21 Q M 0.080752 0.595722 0.323526 -> 0.595722 
 22 V B 0.989075 0.009260 0.001665 -> 0.989075 
 23 R B 0.753794 0.217973 0.028232 -> 0.753794 
 24 K M 0.136766 0.638228 0.225006 -> 0.638228 
 25 A B 0.979580 0.012089 0.008331 -> 0.979580 
 26 V B 0.947996 0.049168 0.002836 -> 0.947996 
 27 S B 0.461778 0.406678 0.131543 -> 0.461778 
 28 I M 0.276237 0.623836 0.099927 -> 0.623836 
 29 G B 0.897841 0.095102 0.007058 -> 0.897841 
 30 I B 0.841746 0.146076 0.012178 -> 0.841746 
 31 D B 0.442931 0.425423 0.131646 -> 0.442931 
 32 R M 0.182456 0.720899 0.096644 -> 0.720899 
 33 A E 0.085490 0.303384 0.611125 -> 0.611125 
 34 A M 0.192327 0.692785 0.114887 -> 0.692785 
 35 I B 0.988207 0.009425 0.002368 -> 0.988207 
 36 S B 0.700251 0.280679 0.019070 -> 0.700251 
 37 K E 0.007130 0.223944 0.768926 -> 0.768926 
 38 V M 0.389263 0.568413 0.042324 -> 0.568413 
 39 L B 0.723836 0.259146 0.017018 -> 0.723836 
 40 Y M 0.208371 0.566209 0.225420 -> 0.566209 
 41 H E 0.010068 0.191871 0.798060 -> 0.798060 
 42 G E 0.058360 0.229595 0.712045 -> 0.712045 
 43 Y M 0.105497 0.609622 0.284881 -> 0.609622 
 44 A B 0.419644 0.355810 0.224546 -> 0.419644 
 45 K E 0.063803 0.445652 0.490545 -> 0.490545 
 46 P B 0.421435 0.414637 0.163929 -> 0.421435 
 47 A B 0.897283 0.093698 0.009019 -> 0.897283 
 48 G B 0.597135 0.315024 0.087841 -> 0.597135 
 49 N B 0.801342 0.167540 0.031118 -> 0.801342 
 50 M B 0.927045 0.066247 0.006708 -> 0.927045 
 51 F B 0.846601 0.146375 0.007024 -> 0.846601 
 52 S B 0.924737 0.066893 0.008370 -> 0.924737 
 53 A M 0.296079 0.406005 0.297916 -> 0.406005 
 54 A E 0.275300 0.280572 0.444128 -> 0.444128 
 55 L B 0.652983 0.313091 0.033926 -> 0.652983 
 56 P M 0.230012 0.432502 0.337487 -> 0.432502 
 57 Y M 0.380853 0.438510 0.180637 -> 0.438510 
 58 A E 0.315034 0.330930 0.354036 -> 0.354036 
 59 G M 0.249991 0.452415 0.297595 -> 0.452415 
 60 K E 0.012893 0.111977 0.875131 -> 0.875131 
 61 Q E 0.009565 0.069352 0.921083 -> 0.921083 
 62 F M 0.230347 0.619419 0.150234 -> 0.619419 
 63 D E 0.005542 0.099636 0.894822 -> 0.894822 
 64 A E 0.141592 0.399873 0.458535 -> 0.458535 
 65 P E 0.073282 0.435315 0.491402 -> 0.491402 
 66 V E 0.046584 0.258356 0.695061 -> 0.695061 
 67 R E 0.057246 0.456510 0.486244 -> 0.486244 
 68 D M 0.054387 0.502731 0.442882 -> 0.502731 
 69 A M 0.447844 0.476185 0.075970 -> 0.476185 
 70 A E 0.004346 0.022918 0.972736 -> 0.972736 
 71 A M 0.177545 0.658389 0.164067 -> 0.658389 
 72 A B 0.986140 0.010649 0.003211 -> 0.986140 
 73 S M 0.107156 0.694944 0.197900 -> 0.694944 
 74 A E 0.006722 0.156172 0.837107 -> 0.837107 
 75 L M 0.391169 0.597622 0.011209 -> 0.597622 
 76 L B 0.942401 0.049620 0.007979 -> 0.942401 
 77 E E 0.002330 0.040959 0.956712 -> 0.956712 
 78 K E 0.000645 0.044028 0.955327 -> 0.955327 
 79 A M 0.300265 0.627436 0.072299 -> 0.627436 
 80 G E 0.023815 0.176163 0.800022 -> 0.800022 
 81 W M 0.407188 0.574902 0.017910 -> 0.574902 
 82 T E 0.013605 0.128087 0.858308 -> 0.858308 
 83 G E 0.018888 0.132072 0.849040 -> 0.849040 
 84 S E 0.056283 0.289237 0.654480 -> 0.654480 
 85 P E 0.026190 0.216339 0.757470 -> 0.757470 
 86 I M 0.185830 0.477231 0.336938 -> 0.477231 
 87 R M 0.107905 0.479425 0.412670 -> 0.479425 
 88 S M 0.413353 0.451178 0.135469 -> 0.451178 
 89 K E 0.007389 0.141480 0.851131 -> 0.851131 
 90 D E 0.010284 0.096434 0.893282 -> 0.893282 
 91 G E 0.069169 0.323475 0.607356 -> 0.607356 
 92 K E 0.013188 0.199361 0.787452 -> 0.787452 
 93 P E 0.020795 0.252916 0.726288 -> 0.726288 
 94 L B 0.507166 0.478425 0.014409 -> 0.507166 
 95 T E 0.025274 0.407874 0.566852 -> 0.566852 
 96 L B 0.759742 0.235178 0.005080 -> 0.759742 
 97 E M 0.050893 0.638343 0.310764 -> 0.638343 
 98 L B 0.965662 0.033567 0.000771 -> 0.965662 
 99 V B 0.479062 0.476474 0.044464 -> 0.479062 
 100 V B 0.908444 0.087675 0.003881 -> 0.908444 
 101 S B 0.640785 0.322903 0.036312 -> 0.640785 
 102 P B 0.431087 0.429501 0.139412 -> 0.431087 
 103 D E 0.041653 0.248840 0.709507 -> 0.709507 
 104 A E 0.061197 0.252554 0.686249 -> 0.686249 
 105 V M 0.260011 0.597604 0.142385 -> 0.597604 
 106 P E 0.038638 0.137411 0.823951 -> 0.823951 
 107 G M 0.265443 0.518614 0.215943 -> 0.518614 
 108 S B 0.808148 0.181628 0.010224 -> 0.808148 
 109 R E 0.027144 0.465451 0.507405 -> 0.507405 
 110 V M 0.146628 0.596366 0.257007 -> 0.596366 
 111 I B 0.950117 0.045697 0.004187 -> 0.950117 
 112 A B 0.944202 0.050857 0.004941 -> 0.944202 
 113 E E 0.039129 0.438387 0.522484 -> 0.522484 
 114 V M 0.467869 0.500482 0.031648 -> 0.500482 
 115 I B 0.984356 0.012571 0.003074 -> 0.984356 
 116 Q M 0.183811 0.731518 0.084671 -> 0.731518 
 117 S E 0.032892 0.330526 0.636582 -> 0.636582 
 118 E M 0.445617 0.536700 0.017682 -> 0.536700 
 119 M B 0.973435 0.023693 0.002872 -> 0.973435 
 120 K E 0.001526 0.040379 0.958095 -> 0.958095 
 121 E E 0.001067 0.075598 0.923335 -> 0.923335 
 122 V B 0.553172 0.431988 0.014840 -> 0.553172 
 123 G E 0.110428 0.430767 0.458805 -> 0.458805 
 124 I B 0.926947 0.069992 0.003061 -> 0.926947 
 125 D E 0.008658 0.274203 0.717139 -> 0.717139 
 126 L B 0.631224 0.363554 0.005222 -> 0.631224 
 127 V E 0.021380 0.427883 0.550737 -> 0.550737 
 128 I M 0.245471 0.680367 0.074162 -> 0.680367 
 129 R E 0.007424 0.293103 0.699473 -> 0.699473 
 130 S E 0.116299 0.416149 0.467552 -> 0.467552 
 131 V M 0.321163 0.606600 0.072237 -> 0.606600 
 132 D E 0.028831 0.336346 0.634822 -> 0.634822 
 133 H E 0.085797 0.452805 0.461398 -> 0.461398 
 134 Q E 0.037832 0.167101 0.795067 -> 0.795067 
 135 K E 0.022541 0.301658 0.675802 -> 0.675802 
 136 Y B 0.654745 0.325065 0.020190 -> 0.654745 
 137 D M 0.467470 0.477056 0.055474 -> 0.477056 
 138 L B 0.965200 0.031441 0.003359 -> 0.965200 
 139 G B 0.965159 0.031806 0.003035 -> 0.965159 
 140 F B 0.951299 0.045974 0.002726 -> 0.951299 
 141 F B 0.955424 0.042576 0.002001 -> 0.955424 
 142 L B 0.921855 0.073871 0.004274 -> 0.921855 
 143 T B 0.814073 0.161313 0.024614 -> 0.814073 
 144 Y B 0.756525 0.215783 0.027692 -> 0.756525 
 145 G B 0.811723 0.160576 0.027701 -> 0.811723 
 146 A B 0.855094 0.129068 0.015838 -> 0.855094 
 147 P B 0.751346 0.206558 0.042097 -> 0.751346 
 148 Y B 0.717253 0.264009 0.018738 -> 0.717253 
 149 D B 0.815904 0.167813 0.016283 -> 0.815904 
 150 P B 0.928834 0.060388 0.010777 -> 0.928834 
 151 F B 0.817355 0.164058 0.018587 -> 0.817355 
 152 G B 0.838288 0.143415 0.018296 -> 0.838288 
 153 S B 0.807557 0.168646 0.023797 -> 0.807557 
 154 L B 0.919278 0.072043 0.008679 -> 0.919278 
 155 V B 0.846621 0.146059 0.007320 -> 0.846621 
 156 A B 0.835879 0.135984 0.028137 -> 0.835879 
 157 L B 0.797640 0.184675 0.017685 -> 0.797640 
 158 C B 0.736519 0.226235 0.037246 -> 0.736519 
 159 L B 0.530652 0.345783 0.123565 -> 0.530652 
 160 S B 0.552461 0.298487 0.149052 -> 0.552461 
 161 T B 0.376697 0.272900 0.350403 -> 0.376697 
 162 F M 0.345966 0.418665 0.235369 -> 0.418665 
 163 G B 0.583153 0.287426 0.129422 -> 0.583153 
 164 K M 0.160840 0.448358 0.390802 -> 0.448358 
 165 L B 0.609858 0.298240 0.091902 -> 0.609858 
 166 V M 0.369902 0.484646 0.145452 -> 0.484646 
 167 T B 0.674736 0.271823 0.053441 -> 0.674736 
 168 D E 0.052528 0.346378 0.601094 -> 0.601094 
 169 P M 0.222773 0.650381 0.126846 -> 0.650381 
 170 V E 0.015125 0.181392 0.803483 -> 0.803483 
 171 N E 0.015235 0.316375 0.668390 -> 0.668390 
 172 L B 0.935902 0.057614 0.006484 -> 0.935902 
 173 D M 0.273185 0.627494 0.099320 -> 0.627494 
 174 P E 0.003803 0.102481 0.893715 -> 0.893715 
 175 L M 0.482280 0.507590 0.010130 -> 0.507590 
 176 I B 0.858644 0.135634 0.005722 -> 0.858644 
 177 N E 0.008323 0.239778 0.751900 -> 0.751900 
 178 A M 0.083863 0.473777 0.442360 -> 0.473777 
 179 A B 0.944309 0.045097 0.010595 -> 0.944309 
 180 T M 0.057987 0.535018 0.406995 -> 0.535018 
 181 A E 0.020093 0.127988 0.851919 -> 0.851919 
 182 A M 0.178219 0.538509 0.283272 -> 0.538509 
 183 T E 0.008473 0.176705 0.814822 -> 0.814822 
 184 G M 0.131816 0.526386 0.341798 -> 0.526386 
 185 D E 0.002665 0.027198 0.970137 -> 0.970137 
 186 Q E 0.005533 0.068253 0.926213 -> 0.926213 
 187 I B 0.621307 0.355320 0.023372 -> 0.621307 
 188 E M 0.063266 0.774475 0.162258 -> 0.774475 
 189 P E 0.006942 0.106483 0.886575 -> 0.886575 
 190 T M 0.269077 0.666010 0.064913 -> 0.666010 
 191 I B 0.952864 0.044809 0.002327 -> 0.952864 
 192 Q M 0.015957 0.570570 0.413473 -> 0.570570 
 193 K E 0.003263 0.232123 0.764614 -> 0.764614 
 194 V B 0.978680 0.018357 0.002963 -> 0.978680 
 195 Y B 0.835467 0.155662 0.008871 -> 0.835467 
 196 D M 0.025182 0.548044 0.426775 -> 0.548044 
 197 W M 0.362553 0.614793 0.022654 -> 0.614793 
 198 L B 0.983485 0.015110 0.001404 -> 0.983485 
 199 R M 0.204745 0.705975 0.089280 -> 0.705975 
 200 D E 0.031888 0.294468 0.673644 -> 0.673644 
 201 N B 0.536486 0.419511 0.044003 -> 0.536486 
 202 D B 0.904309 0.090595 0.005097 -> 0.904309 
 203 A B 0.973684 0.021277 0.005039 -> 0.973684 
 204 I B 0.966545 0.027974 0.005481 -> 0.966545 
 205 A B 0.954612 0.043684 0.001704 -> 0.954612 
 206 P B 0.923808 0.067106 0.009086 -> 0.923808 
 207 L B 0.943893 0.054064 0.002043 -> 0.943893 
 208 V B 0.886600 0.105747 0.007653 -> 0.886600 
 209 Y M 0.219367 0.633717 0.146915 -> 0.633717 
 210 V E 0.038877 0.416429 0.544693 -> 0.544693 
