# Supplementary material for: AcconPred: Predicting Solvent Accessibility and Contact Number Simultaneously by a Multitask Learning Framework under the Conditional Neural Fields Model
Source: Biomed Res Int. 2015 Aug 3;2015:678764. doi: 10.1155/2015/678764 (PMC4538422; doi:10.1155/2015/678764)
Supplement: Supplementary file 1 — Training/testing dataset as well as the CASP11 evaluation dataset could be found in the Supplementary Material. The CASP11 evaluation dataset contains all detailed results from SPINE-X, SANN, ACCpro5 and AcconPred. [file 678764.f1.zip › Supplmentary_Files/105_casp11_domain/casp11_domain_AcconPred/T0818-D1.reso]

# AcconPred: three-state solvent accessibility prediction results 
# probabilities are in the order of B (Bury, pACC: 0-10), M (Medium, pACC: 11-40) and E (Exposed, pACC: 41-100), 
# where pACC is the relative solvent accessibility value calculated by DSSP 
# output format: <position> <one letter amino acid> <predicted label> ... <probabilities> ... -> <maximal probability> 

 1 D E 0.001293 0.020078 0.978629 -> 0.978629 
 2 E E 0.007065 0.076234 0.916700 -> 0.916700 
 3 G E 0.019517 0.197962 0.782521 -> 0.782521 
 4 N E 0.010530 0.191447 0.798023 -> 0.798023 
 5 I M 0.178535 0.515067 0.306398 -> 0.515067 
 6 K E 0.007754 0.207184 0.785063 -> 0.785063 
 7 E E 0.022654 0.197522 0.779824 -> 0.779824 
 8 N M 0.133124 0.500388 0.366489 -> 0.500388 
 9 A B 0.721928 0.205532 0.072540 -> 0.721928 
 10 V B 0.656560 0.255017 0.088423 -> 0.656560 
 11 R M 0.159078 0.576751 0.264172 -> 0.576751 
 12 M B 0.671951 0.266552 0.061497 -> 0.671951 
 13 M B 0.720918 0.203818 0.075265 -> 0.720918 
 14 E M 0.213177 0.521431 0.265392 -> 0.521431 
 15 C B 0.732772 0.224561 0.042667 -> 0.732772 
 16 I B 0.592477 0.327109 0.080415 -> 0.592477 
 17 V B 0.559193 0.330510 0.110297 -> 0.559193 
 18 N M 0.166577 0.528039 0.305384 -> 0.528039 
 19 K E 0.016030 0.198214 0.785756 -> 0.785756 
 20 D E 0.032678 0.316329 0.650993 -> 0.650993 
 21 S M 0.389082 0.492966 0.117951 -> 0.492966 
 22 E E 0.012336 0.197486 0.790178 -> 0.790178 
 23 K E 0.011783 0.342732 0.645485 -> 0.645485 
 24 L B 0.721332 0.244322 0.034345 -> 0.721332 
 25 F B 0.588772 0.366211 0.045017 -> 0.588772 
 26 D E 0.030839 0.409351 0.559810 -> 0.559810 
 27 F B 0.616276 0.340140 0.043584 -> 0.616276 
 28 Y M 0.352191 0.533582 0.114227 -> 0.533582 
 29 N M 0.139582 0.596693 0.263725 -> 0.596693 
 30 K E 0.007012 0.107026 0.885962 -> 0.885962 
 31 D E 0.029708 0.300639 0.669653 -> 0.669653 
 32 M B 0.502609 0.404047 0.093344 -> 0.502609 
 33 K E 0.010878 0.225123 0.764000 -> 0.764000 
 34 D E 0.012093 0.141430 0.846476 -> 0.846476 
 35 N E 0.049479 0.289503 0.661018 -> 0.661018 
 36 Y M 0.290758 0.610599 0.098643 -> 0.610599 
 37 K E 0.004017 0.114889 0.881095 -> 0.881095 
 38 D E 0.014915 0.185094 0.799991 -> 0.799991 
 39 S M 0.103525 0.529175 0.367300 -> 0.529175 
 40 S M 0.117536 0.483692 0.398771 -> 0.483692 
 41 L M 0.421084 0.513937 0.064979 -> 0.513937 
 42 D E 0.005913 0.113857 0.880230 -> 0.880230 
 43 E M 0.035222 0.604720 0.360058 -> 0.604720 
 44 I B 0.953004 0.035603 0.011393 -> 0.953004 
 45 R M 0.042835 0.638583 0.318582 -> 0.638583 
 46 Q E 0.015656 0.321347 0.662998 -> 0.662998 
 47 L B 0.863125 0.127948 0.008926 -> 0.863125 
 48 F B 0.828743 0.163151 0.008107 -> 0.828743 
 49 E E 0.019620 0.281630 0.698751 -> 0.698751 
 50 Y M 0.149200 0.647828 0.202972 -> 0.647828 
 51 I B 0.779642 0.199481 0.020877 -> 0.779642 
 52 D E 0.074623 0.376054 0.549323 -> 0.549323 
 53 G E 0.132501 0.274845 0.592654 -> 0.592654 
 54 A B 0.403576 0.319150 0.277274 -> 0.403576 
 55 I B 0.622348 0.296602 0.081050 -> 0.622348 
 56 T M 0.194375 0.408916 0.396709 -> 0.408916 
 57 S E 0.198683 0.343408 0.457909 -> 0.457909 
 58 Y M 0.299988 0.557002 0.143010 -> 0.557002 
 59 N M 0.105776 0.469020 0.425204 -> 0.469020 
 60 Y M 0.256731 0.568202 0.175067 -> 0.568202 
 61 E E 0.023736 0.187767 0.788496 -> 0.788496 
 62 G E 0.134546 0.325921 0.539533 -> 0.539533 
 63 K E 0.013602 0.137045 0.849353 -> 0.849353 
 64 G E 0.069874 0.222146 0.707980 -> 0.707980 
 65 G E 0.082009 0.283895 0.634096 -> 0.634096 
 66 G E 0.069274 0.260305 0.670421 -> 0.670421 
 67 Q E 0.025741 0.191207 0.783052 -> 0.783052 
 68 E E 0.021672 0.185280 0.793047 -> 0.793047 
 69 A M 0.343081 0.452525 0.204394 -> 0.452525 
 70 K E 0.021835 0.216909 0.761256 -> 0.761256 
 71 N E 0.114972 0.411680 0.473349 -> 0.473349 
 72 D M 0.080322 0.494531 0.425147 -> 0.494531 
 73 G B 0.707861 0.242885 0.049254 -> 0.707861 
 74 I B 0.926141 0.065352 0.008507 -> 0.926141 
 75 I B 0.921656 0.070458 0.007886 -> 0.921656 
 76 C B 0.964254 0.032889 0.002857 -> 0.964254 
 77 Y B 0.494614 0.440451 0.064936 -> 0.494614 
 78 Y B 0.544418 0.395356 0.060225 -> 0.544418 
 79 S B 0.632184 0.288902 0.078914 -> 0.632184 
 80 C B 0.728160 0.235631 0.036209 -> 0.728160 
 81 H M 0.083190 0.508111 0.408699 -> 0.508111 
 82 P E 0.188775 0.390188 0.421037 -> 0.421037 
 83 E E 0.008613 0.144655 0.846732 -> 0.846732 
 84 F B 0.548504 0.417882 0.033615 -> 0.548504 
 85 D E 0.037494 0.353751 0.608755 -> 0.608755 
 86 F B 0.532485 0.424694 0.042821 -> 0.532485 
 87 T E 0.059879 0.413252 0.526869 -> 0.526869 
 88 T M 0.126547 0.527783 0.345670 -> 0.527783 
 89 E E 0.009507 0.130848 0.859644 -> 0.859644 
 90 T E 0.029034 0.189320 0.781647 -> 0.781647 
 91 G E 0.094209 0.283709 0.622083 -> 0.622083 
 92 Q E 0.024102 0.288705 0.687193 -> 0.687193 
 93 E E 0.020233 0.271806 0.707962 -> 0.707962 
 94 Y M 0.461531 0.499493 0.038976 -> 0.499493 
 95 T M 0.323680 0.491211 0.185109 -> 0.491211 
 96 I B 0.936867 0.057946 0.005187 -> 0.936867 
 97 S B 0.447559 0.424828 0.127612 -> 0.447559 
 98 F B 0.896199 0.093091 0.010710 -> 0.896199 
 99 S B 0.596871 0.309444 0.093684 -> 0.596871 
 100 Y B 0.559159 0.343047 0.097794 -> 0.559159 
 101 H M 0.258823 0.547255 0.193921 -> 0.547255 
 102 Y B 0.458384 0.447527 0.094089 -> 0.458384 
 103 I B 0.797526 0.179691 0.022782 -> 0.797526 
 104 W B 0.656893 0.289368 0.053739 -> 0.656893 
 105 N M 0.196592 0.535137 0.268271 -> 0.535137 
 106 E E 0.028585 0.252547 0.718868 -> 0.718868 
 107 H M 0.086517 0.468170 0.445312 -> 0.468170 
 108 P M 0.154444 0.490523 0.355033 -> 0.490523 
 109 E E 0.008562 0.123937 0.867502 -> 0.867502 
 110 Y M 0.149337 0.630795 0.219868 -> 0.630795 
 111 E E 0.022760 0.208180 0.769059 -> 0.769059 
 112 G E 0.316734 0.276097 0.407169 -> 0.407169 
 113 I B 0.671476 0.303914 0.024610 -> 0.671476 
 114 N M 0.149444 0.549878 0.300677 -> 0.549878 
 115 M B 0.684161 0.283829 0.032009 -> 0.684161 
 116 I B 0.750466 0.225142 0.024391 -> 0.750466 
 117 Q M 0.160529 0.603166 0.236304 -> 0.603166 
 118 I B 0.663611 0.303350 0.033039 -> 0.663611 
 119 C B 0.719055 0.263084 0.017861 -> 0.719055 
 120 K E 0.006650 0.204596 0.788754 -> 0.788754 
 121 D E 0.020744 0.186355 0.792901 -> 0.792901 
 122 G M 0.171289 0.436322 0.392388 -> 0.436322 
 123 N E 0.031675 0.206818 0.761507 -> 0.761507 
 124 W B 0.473287 0.456049 0.070664 -> 0.473287 
 125 G E 0.315830 0.335532 0.348638 -> 0.348638 
 126 E E 0.051492 0.390286 0.558221 -> 0.558221 
 127 K E 0.026764 0.328866 0.644370 -> 0.644370 
 128 L B 0.547250 0.412904 0.039847 -> 0.547250 
 129 I B 0.474986 0.416537 0.108477 -> 0.474986 
 130 I B 0.451790 0.368544 0.179666 -> 0.451790 
 131 G M 0.279343 0.378965 0.341693 -> 0.378965 
 132 R E 0.045191 0.377919 0.576890 -> 0.576890 
 133 N E 0.034882 0.212032 0.753086 -> 0.753086 
 134 Y E 0.021949 0.229449 0.748601 -> 0.748601 
