# Supplementary material for: AcconPred: Predicting Solvent Accessibility and Contact Number Simultaneously by a Multitask Learning Framework under the Conditional Neural Fields Model
Source: Biomed Res Int. 2015 Aug 3;2015:678764. doi: 10.1155/2015/678764 (PMC4538422; doi:10.1155/2015/678764)
Supplement: Supplementary file 1 — Training/testing dataset as well as the CASP11 evaluation dataset could be found in the Supplementary Material. The CASP11 evaluation dataset contains all detailed results from SPINE-X, SANN, ACCpro5 and AcconPred. [file 678764.f1.zip › Supplmentary_Files/105_casp11_domain/casp11_domain_AcconPred/T0819-D1.reso]

# AcconPred: three-state solvent accessibility prediction results 
# probabilities are in the order of B (Bury, pACC: 0-10), M (Medium, pACC: 11-40) and E (Exposed, pACC: 41-100), 
# where pACC is the relative solvent accessibility value calculated by DSSP 
# output format: <position> <one letter amino acid> <predicted label> ... <probabilities> ... -> <maximal probability> 

 1 M E 0.024971 0.085461 0.889568 -> 0.889568 
 2 S E 0.032008 0.304093 0.663899 -> 0.663899 
 3 A E 0.050007 0.258983 0.691010 -> 0.691010 
 4 F M 0.239654 0.519463 0.240883 -> 0.519463 
 5 S E 0.102142 0.329613 0.568246 -> 0.568246 
 6 R E 0.041703 0.424130 0.534167 -> 0.534167 
 7 F B 0.717672 0.251706 0.030622 -> 0.717672 
 8 T M 0.104501 0.587901 0.307599 -> 0.587901 
 9 P E 0.042324 0.207006 0.750670 -> 0.750670 
 10 L M 0.212440 0.583243 0.204317 -> 0.583243 
 11 I B 0.627934 0.338134 0.033933 -> 0.627934 
 12 Q E 0.007684 0.111304 0.881012 -> 0.881012 
 13 S E 0.021926 0.146822 0.831253 -> 0.831253 
 14 L B 0.493939 0.424514 0.081546 -> 0.493939 
 15 P E 0.052293 0.300840 0.646867 -> 0.646867 
 16 A E 0.191465 0.376224 0.432310 -> 0.432310 
 17 V M 0.151407 0.478913 0.369680 -> 0.478913 
 18 G M 0.148878 0.464762 0.386359 -> 0.464762 
 19 P M 0.263778 0.396027 0.340195 -> 0.396027 
 20 E E 0.016199 0.191340 0.792461 -> 0.792461 
 21 A M 0.128923 0.482824 0.388253 -> 0.482824 
 22 L B 0.644669 0.324659 0.030673 -> 0.644669 
 23 E M 0.052756 0.483344 0.463899 -> 0.483344 
 24 R E 0.015478 0.248637 0.735884 -> 0.735884 
 25 Q E 0.013365 0.181842 0.804793 -> 0.804793 
 26 H E 0.046638 0.459610 0.493752 -> 0.493752 
 27 G E 0.027134 0.100623 0.872243 -> 0.872243 
 28 R M 0.058791 0.601084 0.340125 -> 0.601084 
 29 K E 0.001480 0.053848 0.944672 -> 0.944672 
 30 I M 0.181670 0.530180 0.288149 -> 0.530180 
 31 A B 0.561215 0.352776 0.086009 -> 0.561215 
 32 A B 0.912034 0.083261 0.004706 -> 0.912034 
 33 R M 0.170030 0.706393 0.123577 -> 0.706393 
 34 I B 0.963632 0.032998 0.003370 -> 0.963632 
 35 G B 0.838384 0.142570 0.019046 -> 0.838384 
 36 A M 0.420401 0.456236 0.123363 -> 0.456236 
 37 N B 0.556977 0.299307 0.143716 -> 0.556977 
 38 E B 0.568864 0.323384 0.107752 -> 0.568864 
 39 S B 0.721887 0.229810 0.048303 -> 0.721887 
 40 G M 0.339580 0.386913 0.273507 -> 0.386913 
 41 F M 0.406380 0.440923 0.152697 -> 0.440923 
 42 G M 0.210641 0.447959 0.341400 -> 0.447959 
 43 P B 0.622753 0.333373 0.043874 -> 0.622753 
 44 A B 0.550257 0.386882 0.062861 -> 0.550257 
 45 P E 0.021727 0.191920 0.786353 -> 0.786353 
 46 S E 0.053058 0.456938 0.490004 -> 0.490004 
 47 V B 0.985941 0.010551 0.003508 -> 0.985941 
 48 L B 0.509301 0.478091 0.012608 -> 0.509301 
 49 L E 0.022327 0.341714 0.635959 -> 0.635959 
 50 A B 0.531388 0.457794 0.010818 -> 0.531388 
 51 I B 0.951923 0.043111 0.004966 -> 0.951923 
 52 R E 0.021121 0.406784 0.572095 -> 0.572095 
 53 Q E 0.005486 0.093884 0.900630 -> 0.900630 
 54 A M 0.420008 0.482877 0.097115 -> 0.482877 
 55 A M 0.416031 0.460114 0.123855 -> 0.460114 
 56 G E 0.036219 0.228365 0.735416 -> 0.735416 
 57 D E 0.028599 0.267874 0.703527 -> 0.703527 
 58 T M 0.320432 0.393149 0.286419 -> 0.393149 
 59 W M 0.398236 0.460032 0.141732 -> 0.460032 
 60 K M 0.125943 0.470344 0.403714 -> 0.470344 
 61 Y B 0.500676 0.446337 0.052987 -> 0.500676 
 62 A M 0.304918 0.385751 0.309331 -> 0.385751 
 63 D M 0.345319 0.480860 0.173821 -> 0.480860 
 64 P E 0.083789 0.296893 0.619318 -> 0.619318 
 65 E E 0.007232 0.238793 0.753975 -> 0.753975 
 66 N M 0.401567 0.535141 0.063291 -> 0.535141 
 67 H E 0.016671 0.194744 0.788585 -> 0.788585 
 68 D E 0.019744 0.284990 0.695266 -> 0.695266 
 69 L B 0.936848 0.054363 0.008789 -> 0.936848 
 70 K M 0.249425 0.687250 0.063325 -> 0.687250 
 71 Q E 0.013331 0.269776 0.716893 -> 0.716893 
 72 A M 0.304666 0.648611 0.046723 -> 0.648611 
 73 L B 0.993822 0.004871 0.001307 -> 0.993822 
 74 A B 0.655319 0.315600 0.029081 -> 0.655319 
 75 R E 0.000861 0.028390 0.970749 -> 0.970749 
 76 H M 0.035494 0.689409 0.275097 -> 0.689409 
 77 L M 0.302430 0.664090 0.033480 -> 0.664090 
 78 G E 0.005741 0.072676 0.921584 -> 0.921584 
 79 T M 0.307461 0.637515 0.055024 -> 0.637515 
 80 S E 0.006090 0.208961 0.784949 -> 0.784949 
 81 P E 0.025845 0.431167 0.542988 -> 0.542988 
 82 A E 0.037300 0.305746 0.656954 -> 0.656954 
 83 N M 0.305027 0.659460 0.035513 -> 0.659460 
 84 I B 0.926387 0.072318 0.001295 -> 0.926387 
 85 A B 0.819077 0.178472 0.002451 -> 0.819077 
 86 I B 0.833239 0.150397 0.016363 -> 0.833239 
 87 G B 0.845531 0.142405 0.012064 -> 0.845531 
 88 E M 0.363772 0.459312 0.176916 -> 0.459312 
 89 G B 0.604161 0.317209 0.078630 -> 0.604161 
 90 I B 0.851245 0.131774 0.016981 -> 0.851245 
 91 D M 0.246567 0.573836 0.179597 -> 0.573836 
 92 G B 0.702218 0.262839 0.034943 -> 0.702218 
 93 L B 0.990027 0.008459 0.001513 -> 0.990027 
 94 L B 0.951273 0.047213 0.001514 -> 0.951273 
 95 G B 0.494217 0.451269 0.054514 -> 0.494217 
 96 Q B 0.702915 0.254235 0.042850 -> 0.702915 
 97 I B 0.998029 0.001619 0.000353 -> 0.998029 
 98 V B 0.975281 0.022222 0.002497 -> 0.975281 
 99 R M 0.099639 0.644238 0.256123 -> 0.644238 
 100 L B 0.684618 0.294930 0.020453 -> 0.684618 
 101 V B 0.850820 0.146894 0.002286 -> 0.850820 
 102 V B 0.671072 0.302153 0.026776 -> 0.671072 
 103 E E 0.031907 0.375347 0.592746 -> 0.592746 
 104 A E 0.028724 0.173791 0.797485 -> 0.797485 
 105 G E 0.011587 0.101405 0.887008 -> 0.887008 
 106 A M 0.348303 0.598795 0.052902 -> 0.598795 
 107 P M 0.220879 0.617426 0.161695 -> 0.617426 
 108 V B 0.850096 0.146292 0.003611 -> 0.850096 
 109 V B 0.893175 0.100607 0.006217 -> 0.893175 
 110 T B 0.915630 0.076196 0.008174 -> 0.915630 
 111 S B 0.887469 0.103780 0.008751 -> 0.887469 
 112 L M 0.257211 0.580850 0.161939 -> 0.580850 
 113 G B 0.559446 0.312813 0.127740 -> 0.559446 
 114 G B 0.663567 0.252673 0.083760 -> 0.663567 
 115 Y B 0.541778 0.404961 0.053261 -> 0.541778 
 116 P E 0.254431 0.324975 0.420594 -> 0.420594 
 117 T B 0.533559 0.362586 0.103855 -> 0.533559 
 118 F B 0.970831 0.024741 0.004428 -> 0.970831 
 119 N M 0.376912 0.548087 0.075001 -> 0.548087 
 120 Y M 0.143492 0.490990 0.365518 -> 0.490990 
 121 H B 0.732557 0.243300 0.024144 -> 0.732557 
 122 V B 0.948448 0.046148 0.005404 -> 0.948448 
 123 A E 0.077523 0.330086 0.592392 -> 0.592392 
 124 G M 0.148744 0.439890 0.411366 -> 0.439890 
 125 H M 0.197723 0.644625 0.157652 -> 0.644625 
 126 G E 0.060957 0.200126 0.738917 -> 0.738917 
 127 G B 0.530360 0.417387 0.052253 -> 0.530360 
 128 R E 0.004078 0.129892 0.866030 -> 0.866030 
 129 L M 0.163708 0.650191 0.186101 -> 0.650191 
 130 V M 0.160617 0.642778 0.196605 -> 0.642778 
 131 T E 0.048403 0.431790 0.519807 -> 0.519807 
 132 V B 0.802279 0.190665 0.007056 -> 0.802279 
 133 P E 0.043571 0.316291 0.640139 -> 0.640139 
 134 Y M 0.265540 0.589674 0.144786 -> 0.589674 
 135 A E 0.039038 0.319714 0.641247 -> 0.641247 
 136 D E 0.010386 0.137979 0.851635 -> 0.851635 
 137 D E 0.054812 0.331000 0.614189 -> 0.614189 
 138 R E 0.072200 0.411148 0.516652 -> 0.516652 
 139 E M 0.135976 0.480633 0.383391 -> 0.480633 
 140 D M 0.076468 0.573563 0.349969 -> 0.573563 
 141 L B 0.713528 0.260996 0.025476 -> 0.713528 
 142 E E 0.005379 0.114858 0.879763 -> 0.879763 
 143 G M 0.062443 0.498261 0.439296 -> 0.498261 
 144 L B 0.911185 0.085332 0.003482 -> 0.911185 
 145 L M 0.370576 0.565832 0.063592 -> 0.565832 
 146 A E 0.007200 0.059829 0.932972 -> 0.932972 
 147 A M 0.244479 0.574737 0.180784 -> 0.574737 
 148 V B 0.771685 0.216236 0.012079 -> 0.771685 
 149 G E 0.040443 0.307863 0.651694 -> 0.651694 
 150 R E 0.008630 0.264922 0.726448 -> 0.726448 
 151 E E 0.013815 0.157146 0.829040 -> 0.829040 
 152 N M 0.048915 0.509995 0.441090 -> 0.509995 
 153 A B 0.887843 0.109000 0.003157 -> 0.887843 
 154 P M 0.348921 0.599383 0.051697 -> 0.599383 
 155 L B 0.983001 0.016252 0.000747 -> 0.983001 
 156 V B 0.991687 0.007925 0.000388 -> 0.991687 
 157 Y B 0.940860 0.057349 0.001791 -> 0.940860 
 158 L B 0.989460 0.009872 0.000668 -> 0.989460 
 159 A B 0.928746 0.067154 0.004100 -> 0.928746 
 160 N B 0.534053 0.431066 0.034881 -> 0.534053 
 161 P B 0.758047 0.187413 0.054540 -> 0.758047 
 162 D B 0.624917 0.283656 0.091427 -> 0.624917 
 163 N B 0.787924 0.187599 0.024476 -> 0.787924 
 164 P B 0.595829 0.259566 0.144605 -> 0.595829 
 165 M B 0.500799 0.359393 0.139808 -> 0.500799 
 166 G B 0.680992 0.261195 0.057813 -> 0.680992 
 167 S M 0.317717 0.414635 0.267648 -> 0.414635 
 168 W M 0.351373 0.503407 0.145220 -> 0.503407 
 169 W B 0.546361 0.423265 0.030374 -> 0.546361 
 170 P M 0.094171 0.488320 0.417509 -> 0.488320 
 171 A M 0.093288 0.529515 0.377197 -> 0.529515 
 172 E E 0.000916 0.040038 0.959046 -> 0.959046 
 173 R M 0.052760 0.759022 0.188219 -> 0.759022 
 174 V B 0.924611 0.066572 0.008817 -> 0.924611 
 175 V M 0.133728 0.707955 0.158318 -> 0.707955 
 176 A M 0.056019 0.600593 0.343388 -> 0.600593 
 177 F B 0.958330 0.037154 0.004517 -> 0.958330 
 178 A B 0.885867 0.104449 0.009683 -> 0.885867 
 179 Q E 0.000657 0.043014 0.956328 -> 0.956328 
 180 A M 0.051291 0.558282 0.390427 -> 0.558282 
 181 L B 0.610544 0.382984 0.006471 -> 0.610544 
 182 P E 0.025614 0.300765 0.673621 -> 0.673621 
 183 E E 0.003646 0.108864 0.887491 -> 0.887491 
 184 T M 0.144791 0.625190 0.230019 -> 0.625190 
 185 T B 0.724801 0.266412 0.008786 -> 0.724801 
 186 L B 0.957496 0.041392 0.001112 -> 0.957496 
 187 L B 0.981618 0.018023 0.000359 -> 0.981618 
 188 V B 0.994728 0.004806 0.000466 -> 0.994728 
 189 L B 0.991003 0.008701 0.000295 -> 0.991003 
 190 D B 0.871122 0.125324 0.003555 -> 0.871122 
 191 E B 0.801559 0.182656 0.015785 -> 0.801559 
 192 A B 0.937144 0.052503 0.010353 -> 0.937144 
 193 Y B 0.580045 0.375811 0.044144 -> 0.580045 
 194 C B 0.651952 0.313288 0.034760 -> 0.651952 
 195 E M 0.313771 0.511891 0.174338 -> 0.511891 
 196 T B 0.564301 0.335493 0.100206 -> 0.564301 
 197 A B 0.483383 0.453598 0.063019 -> 0.483383 
 198 P M 0.084987 0.528217 0.386796 -> 0.528217 
 199 R E 0.020976 0.209982 0.769041 -> 0.769041 
 200 D E 0.017643 0.120673 0.861684 -> 0.861684 
 201 A E 0.088545 0.315453 0.596001 -> 0.596001 
 202 L M 0.383439 0.525829 0.090732 -> 0.525829 
 203 P M 0.249391 0.417958 0.332651 -> 0.417958 
 204 P M 0.271444 0.408594 0.319961 -> 0.408594 
 205 I B 0.570265 0.355055 0.074680 -> 0.570265 
 206 E E 0.020952 0.271010 0.708038 -> 0.708038 
 207 S E 0.043916 0.274726 0.681358 -> 0.681358 
 208 L B 0.705596 0.247442 0.046962 -> 0.705596 
 209 I M 0.201317 0.487361 0.311322 -> 0.487361 
 210 D E 0.003323 0.063408 0.933268 -> 0.933268 
 211 K M 0.050120 0.727419 0.222461 -> 0.727419 
 212 P E 0.024505 0.190008 0.785487 -> 0.785487 
 213 N B 0.536067 0.441419 0.022515 -> 0.536067 
 214 V B 0.981373 0.017550 0.001077 -> 0.981373 
 215 I B 0.948542 0.048347 0.003111 -> 0.948542 
 216 R B 0.756660 0.235196 0.008144 -> 0.756660 
 217 A B 0.995588 0.004322 0.000090 -> 0.995588 
 218 R M 0.399590 0.554900 0.045510 -> 0.554900 
 219 T B 0.795409 0.185508 0.019084 -> 0.795409 
 220 F B 0.879715 0.109963 0.010322 -> 0.879715 
 221 S B 0.772480 0.210591 0.016929 -> 0.772480 
 222 K B 0.479145 0.406491 0.114364 -> 0.479145 
 223 A B 0.908539 0.075492 0.015969 -> 0.908539 
 224 Y B 0.658127 0.309172 0.032701 -> 0.658127 
 225 G B 0.767319 0.195214 0.037467 -> 0.767319 
 226 L B 0.880331 0.111553 0.008117 -> 0.880331 
 227 A B 0.844934 0.135976 0.019090 -> 0.844934 
 228 G B 0.875372 0.107602 0.017026 -> 0.875372 
 229 A B 0.871499 0.103109 0.025392 -> 0.871499 
 230 R B 0.656144 0.325874 0.017982 -> 0.656144 
 231 I B 0.929410 0.066374 0.004216 -> 0.929410 
 232 G B 0.946104 0.050063 0.003832 -> 0.946104 
 233 Y B 0.708920 0.282097 0.008983 -> 0.708920 
 234 T B 0.939189 0.051489 0.009321 -> 0.939189 
 235 L B 0.821686 0.169379 0.008935 -> 0.821686 
 236 S B 0.811950 0.172309 0.015741 -> 0.811950 
 237 T M 0.242337 0.631389 0.126273 -> 0.631389 
 238 P E 0.005024 0.164591 0.830385 -> 0.830385 
 239 G E 0.031777 0.255872 0.712351 -> 0.712351 
 240 T B 0.744882 0.238905 0.016213 -> 0.744882 
 241 A B 0.546296 0.425479 0.028225 -> 0.546296 
 242 Q E 0.004161 0.134718 0.861121 -> 0.861121 
 243 A B 0.492120 0.486797 0.021082 -> 0.492120 
 244 F B 0.962348 0.034182 0.003470 -> 0.962348 
 245 D M 0.053594 0.535467 0.410939 -> 0.535467 
 246 K E 0.011960 0.341667 0.646373 -> 0.646373 
 247 I B 0.616123 0.332769 0.051108 -> 0.616123 
 248 R M 0.097016 0.649807 0.253176 -> 0.649807 
 249 N E 0.079748 0.276078 0.644174 -> 0.644174 
 250 H M 0.201071 0.456958 0.341971 -> 0.456958 
 251 F B 0.613583 0.316492 0.069924 -> 0.613583 
 252 G B 0.546074 0.282870 0.171056 -> 0.546074 
 253 M B 0.698338 0.245831 0.055831 -> 0.698338 
 254 S B 0.644467 0.295643 0.059890 -> 0.644467 
 255 R M 0.267922 0.585259 0.146819 -> 0.585259 
 256 I B 0.781269 0.175839 0.042891 -> 0.781269 
 257 G B 0.956742 0.040090 0.003168 -> 0.956742 
 258 V B 0.861947 0.133622 0.004432 -> 0.861947 
 259 A B 0.671437 0.270001 0.058561 -> 0.671437 
 260 A B 0.944041 0.050991 0.004968 -> 0.944041 
 261 A B 0.993048 0.006237 0.000714 -> 0.993048 
 262 I M 0.454294 0.532953 0.012753 -> 0.532953 
 263 A M 0.179746 0.549043 0.271211 -> 0.549043 
 264 A B 0.864198 0.121535 0.014267 -> 0.864198 
 265 L B 0.873658 0.118499 0.007844 -> 0.873658 
 266 A E 0.075599 0.360205 0.564196 -> 0.564196 
 267 D M 0.184335 0.640583 0.175082 -> 0.640583 
 268 Q E 0.026881 0.413773 0.559346 -> 0.559346 
 269 D E 0.006610 0.034473 0.958917 -> 0.958917 
 270 Y M 0.194367 0.735058 0.070575 -> 0.735058 
 271 L B 0.813923 0.165907 0.020171 -> 0.813923 
 272 K E 0.004008 0.157866 0.838126 -> 0.838126 
 273 E E 0.002806 0.087397 0.909797 -> 0.909797 
 274 V B 0.729073 0.261863 0.009064 -> 0.729073 
 275 T B 0.499306 0.478997 0.021697 -> 0.499306 
 276 L E 0.025412 0.248465 0.726123 -> 0.726123 
 277 K E 0.021081 0.397526 0.581393 -> 0.581393 
 278 I B 0.954174 0.034766 0.011060 -> 0.954174 
 279 A M 0.153191 0.585739 0.261070 -> 0.585739 
 280 N E 0.023277 0.292663 0.684060 -> 0.684060 
 281 S B 0.513930 0.445264 0.040806 -> 0.513930 
 282 R M 0.333189 0.603315 0.063496 -> 0.603315 
 283 Q E 0.010957 0.170115 0.818928 -> 0.818928 
 284 R M 0.069811 0.696502 0.233686 -> 0.696502 
 285 I B 0.990932 0.006625 0.002443 -> 0.990932 
 286 G M 0.394376 0.556610 0.049014 -> 0.556610 
 287 R E 0.005764 0.158475 0.835761 -> 0.835761 
 288 I M 0.436650 0.538078 0.025273 -> 0.538078 
 289 A B 0.973767 0.020554 0.005679 -> 0.973767 
 290 A E 0.010633 0.092575 0.896793 -> 0.896793 
 291 D E 0.001572 0.049495 0.948933 -> 0.948933 
 292 S M 0.048323 0.541231 0.410446 -> 0.541231 
 293 G E 0.005671 0.100075 0.894254 -> 0.894254 
 294 L B 0.551393 0.425740 0.022866 -> 0.551393 
 295 A E 0.042889 0.226893 0.730218 -> 0.730218 
 296 P M 0.130206 0.535110 0.334684 -> 0.535110 
 297 L M 0.330180 0.600974 0.068846 -> 0.600974 
 298 P E 0.060994 0.375995 0.563011 -> 0.563011 
 299 S E 0.096509 0.306703 0.596788 -> 0.596788 
 300 A M 0.209820 0.454696 0.335483 -> 0.454696 
 301 T B 0.844523 0.133636 0.021841 -> 0.844523 
 302 N B 0.845934 0.146356 0.007710 -> 0.845934 
 303 F B 0.963332 0.035517 0.001151 -> 0.963332 
 304 V B 0.971153 0.027541 0.001306 -> 0.971153 
 305 A B 0.930236 0.067054 0.002710 -> 0.930236 
 306 V B 0.981202 0.017930 0.000869 -> 0.981202 
 307 D M 0.182857 0.644616 0.172527 -> 0.644616 
 308 C B 0.879564 0.113358 0.007078 -> 0.879564 
 309 G E 0.064168 0.418709 0.517124 -> 0.517124 
 310 K E 0.023449 0.258498 0.718053 -> 0.718053 
 311 D E 0.059599 0.311885 0.628515 -> 0.628515 
 312 A M 0.287972 0.445228 0.266800 -> 0.445228 
 313 S E 0.041487 0.152663 0.805850 -> 0.805850 
 314 Y M 0.187450 0.651079 0.161471 -> 0.651079 
 315 A B 0.930579 0.059538 0.009883 -> 0.930579 
 316 R M 0.044867 0.644003 0.311130 -> 0.644003 
 317 A E 0.106211 0.441755 0.452034 -> 0.452034 
 318 I B 0.873797 0.101897 0.024305 -> 0.873797 
 319 V B 0.987452 0.009430 0.003118 -> 0.987452 
 320 D M 0.050982 0.656187 0.292831 -> 0.656187 
 321 R E 0.006628 0.322164 0.671208 -> 0.671208 
 322 L B 0.615701 0.367735 0.016564 -> 0.615701 
 323 M B 0.962613 0.030158 0.007229 -> 0.962613 
 324 S E 0.013016 0.246340 0.740643 -> 0.740643 
 325 D E 0.002234 0.077338 0.920428 -> 0.920428 
 326 H M 0.038693 0.648583 0.312724 -> 0.648583 
 327 G M 0.401701 0.415078 0.183221 -> 0.415078 
 328 I B 0.987175 0.012152 0.000674 -> 0.987175 
 329 F B 0.797977 0.199216 0.002807 -> 0.797977 
 330 I B 0.921121 0.076449 0.002430 -> 0.921121 
 331 R B 0.630278 0.326293 0.043429 -> 0.630278 
 332 M B 0.710022 0.268289 0.021689 -> 0.710022 
 333 P B 0.571584 0.329773 0.098643 -> 0.571584 
 334 G E 0.033123 0.205149 0.761729 -> 0.761729 
 335 V M 0.094572 0.458587 0.446841 -> 0.458587 
 336 A E 0.120726 0.365980 0.513294 -> 0.513294 
 337 P E 0.049779 0.322728 0.627492 -> 0.627492 
 338 L B 0.674679 0.298106 0.027216 -> 0.674679 
 339 N E 0.011044 0.191587 0.797369 -> 0.797369 
 340 R M 0.040092 0.586603 0.373305 -> 0.586603 
 341 C B 0.880836 0.112832 0.006332 -> 0.880836 
 342 I B 0.982531 0.015553 0.001916 -> 0.982531 
 343 R B 0.786324 0.206973 0.006703 -> 0.786324 
 344 I B 0.981648 0.015161 0.003191 -> 0.981648 
 345 S B 0.944558 0.048662 0.006780 -> 0.944558 
 346 T B 0.842207 0.142035 0.015758 -> 0.842207 
 347 A B 0.579757 0.386416 0.033827 -> 0.579757 
 348 P M 0.060463 0.581291 0.358246 -> 0.581291 
 349 D E 0.011882 0.337445 0.650673 -> 0.650673 
 350 A E 0.016215 0.075573 0.908212 -> 0.908212 
 351 E M 0.297443 0.622785 0.079772 -> 0.622785 
 352 M B 0.852528 0.137379 0.010094 -> 0.852528 
 353 D E 0.005033 0.156993 0.837973 -> 0.837973 
 354 L M 0.099446 0.728774 0.171780 -> 0.728774 
 355 L B 0.973966 0.023253 0.002781 -> 0.973966 
 356 A B 0.544712 0.438133 0.017155 -> 0.544712 
 357 A E 0.001557 0.079403 0.919040 -> 0.919040 
 358 A B 0.607417 0.383360 0.009222 -> 0.607417 
 359 L B 0.972442 0.022509 0.005049 -> 0.972442 
 360 P M 0.035052 0.612174 0.352774 -> 0.612174 
 361 E E 0.004994 0.189903 0.805103 -> 0.805103 
 362 V B 0.789271 0.203366 0.007363 -> 0.789271 
 363 I B 0.496939 0.447269 0.055792 -> 0.496939 
 364 R E 0.002068 0.071809 0.926123 -> 0.926123 
 365 S E 0.002056 0.095841 0.902102 -> 0.902102 
 366 L M 0.240333 0.604519 0.155149 -> 0.604519 
 367 A E 0.015580 0.141135 0.843284 -> 0.843284 
