# Supplementary material for: AcconPred: Predicting Solvent Accessibility and Contact Number Simultaneously by a Multitask Learning Framework under the Conditional Neural Fields Model
Source: Biomed Res Int. 2015 Aug 3;2015:678764. doi: 10.1155/2015/678764 (PMC4538422; doi:10.1155/2015/678764)
Supplement: Supplementary file 1 — Training/testing dataset as well as the CASP11 evaluation dataset could be found in the Supplementary Material. The CASP11 evaluation dataset contains all detailed results from SPINE-X, SANN, ACCpro5 and AcconPred. [file 678764.f1.zip › Supplmentary_Files/105_casp11_domain/casp11_domain_AcconPred/T0820-D1.reso]

# AcconPred: three-state solvent accessibility prediction results 
# probabilities are in the order of B (Bury, pACC: 0-10), M (Medium, pACC: 11-40) and E (Exposed, pACC: 41-100), 
# where pACC is the relative solvent accessibility value calculated by DSSP 
# output format: <position> <one letter amino acid> <predicted label> ... <probabilities> ... -> <maximal probability> 

 1 S E 0.001508 0.019324 0.979168 -> 0.979168 
 2 E E 0.004922 0.125302 0.869776 -> 0.869776 
 3 T M 0.077052 0.474459 0.448490 -> 0.474459 
 4 T M 0.193924 0.498513 0.307563 -> 0.498513 
 5 I B 0.586690 0.343225 0.070086 -> 0.586690 
 6 I M 0.365312 0.537958 0.096730 -> 0.537958 
 7 L B 0.712886 0.251642 0.035472 -> 0.712886 
 8 T M 0.331244 0.479107 0.189649 -> 0.479107 
 9 D E 0.097896 0.363314 0.538790 -> 0.538790 
 10 D E 0.013043 0.146081 0.840876 -> 0.840876 
 11 G E 0.186509 0.330578 0.482913 -> 0.482913 
 12 V B 0.514217 0.385813 0.099970 -> 0.514217 
 13 T E 0.157002 0.335636 0.507361 -> 0.507361 
 14 D E 0.088845 0.362425 0.548730 -> 0.548730 
 15 I M 0.389533 0.447601 0.162866 -> 0.447601 
 16 G E 0.321235 0.316471 0.362294 -> 0.362294 
 17 M M 0.330112 0.405763 0.264125 -> 0.405763 
 18 A B 0.625856 0.256070 0.118074 -> 0.625856 
 19 R E 0.063279 0.464692 0.472028 -> 0.472028 
 20 N E 0.082501 0.274473 0.643026 -> 0.643026 
 21 T B 0.502954 0.413927 0.083120 -> 0.502954 
 22 I B 0.875778 0.106043 0.018178 -> 0.875778 
 23 H E 0.072822 0.463296 0.463883 -> 0.463883 
 24 Q E 0.060887 0.468310 0.470803 -> 0.470803 
 25 M B 0.776546 0.185223 0.038231 -> 0.776546 
 26 V B 0.475895 0.416840 0.107264 -> 0.475895 
 27 G E 0.151466 0.309711 0.538823 -> 0.538823 
 28 L B 0.529316 0.403366 0.067318 -> 0.529316 
 29 V B 0.765874 0.196249 0.037877 -> 0.765874 
 30 D E 0.059950 0.388012 0.552038 -> 0.552038 
 31 D E 0.047865 0.313392 0.638743 -> 0.638743 
 32 L B 0.555260 0.389141 0.055599 -> 0.555260 
 33 V M 0.377222 0.463778 0.159000 -> 0.463778 
 34 A E 0.070784 0.238880 0.690336 -> 0.690336 
 35 S E 0.084372 0.354946 0.560682 -> 0.560682 
 36 E E 0.024677 0.270781 0.704542 -> 0.704542 
 37 A E 0.104983 0.250454 0.644563 -> 0.644563 
 38 T M 0.197654 0.445846 0.356500 -> 0.445846 
 39 A B 0.491741 0.378510 0.129748 -> 0.491741 
 40 S E 0.020106 0.203264 0.776630 -> 0.776630 
 41 Q E 0.031197 0.405073 0.563730 -> 0.563730 
 42 L B 0.859615 0.119496 0.020889 -> 0.859615 
 43 R M 0.136516 0.668480 0.195004 -> 0.668480 
 44 E E 0.023917 0.260392 0.715691 -> 0.715691 
 45 A B 0.645389 0.303212 0.051399 -> 0.645389 
 46 L B 0.945875 0.044114 0.010011 -> 0.945875 
 47 Y M 0.294692 0.542492 0.162817 -> 0.542492 
 48 A E 0.301661 0.333334 0.365005 -> 0.365005 
 49 A B 0.763614 0.180358 0.056028 -> 0.763614 
 50 L B 0.621881 0.292694 0.085425 -> 0.621881 
 51 A E 0.180063 0.300286 0.519651 -> 0.519651 
 52 R E 0.009763 0.196310 0.793926 -> 0.793926 
 53 G E 0.103667 0.261272 0.635061 -> 0.635061 
 54 L B 0.473955 0.438279 0.087766 -> 0.473955 
 55 G E 0.222423 0.293602 0.483975 -> 0.483975 
 56 F B 0.500490 0.445125 0.054385 -> 0.500490 
 57 Q E 0.025730 0.291122 0.683148 -> 0.683148 
 58 A M 0.291292 0.445699 0.263009 -> 0.445699 
 59 S E 0.079316 0.335278 0.585406 -> 0.585406 
 60 V M 0.231311 0.405774 0.362915 -> 0.405774 
 61 G E 0.098752 0.268208 0.633040 -> 0.633040 
 62 Q E 0.040899 0.261473 0.697627 -> 0.697627 
 63 S E 0.116307 0.307521 0.576172 -> 0.576172 
 64 S M 0.271055 0.482016 0.246929 -> 0.482016 
 65 P E 0.186393 0.340261 0.473346 -> 0.473346 
 66 L M 0.352004 0.382784 0.265212 -> 0.382784 
 67 L B 0.494121 0.331779 0.174100 -> 0.494121 
 68 L B 0.635208 0.255993 0.108799 -> 0.635208 
 69 R M 0.257075 0.533336 0.209589 -> 0.533336 
 70 R M 0.264475 0.513097 0.222427 -> 0.513097 
 71 S B 0.509182 0.336399 0.154419 -> 0.509182 
 72 V B 0.764718 0.175496 0.059786 -> 0.764718 
 73 L B 0.667858 0.234925 0.097217 -> 0.667858 
 74 L B 0.400571 0.361436 0.237993 -> 0.400571 
 75 S M 0.396492 0.419816 0.183691 -> 0.419816 
 76 L B 0.718348 0.215830 0.065822 -> 0.718348 
 77 R M 0.095600 0.534631 0.369769 -> 0.534631 
 78 G M 0.306643 0.368119 0.325238 -> 0.368119 
 79 L B 0.771236 0.200154 0.028610 -> 0.771236 
 80 A B 0.674002 0.259782 0.066216 -> 0.674002 
 81 R E 0.019799 0.269938 0.710262 -> 0.710262 
 82 R M 0.146585 0.632065 0.221350 -> 0.632065 
 83 L B 0.727107 0.238499 0.034394 -> 0.727107 
 84 A E 0.190906 0.368906 0.440188 -> 0.440188 
 85 R E 0.008506 0.227370 0.764124 -> 0.764124 
 86 I M 0.291301 0.484857 0.223842 -> 0.484857 
 87 E E 0.012886 0.226934 0.760180 -> 0.760180 
 88 A E 0.009214 0.098583 0.892203 -> 0.892203 
 89 D E 0.003149 0.091230 0.905621 -> 0.905621 
 90 A E 0.001087 0.022939 0.975973 -> 0.975973 
