# Supplementary material for: AcconPred: Predicting Solvent Accessibility and Contact Number Simultaneously by a Multitask Learning Framework under the Conditional Neural Fields Model
Source: Biomed Res Int. 2015 Aug 3;2015:678764. doi: 10.1155/2015/678764 (PMC4538422; doi:10.1155/2015/678764)
Supplement: Supplementary file 1 — Training/testing dataset as well as the CASP11 evaluation dataset could be found in the Supplementary Material. The CASP11 evaluation dataset contains all detailed results from SPINE-X, SANN, ACCpro5 and AcconPred. [file 678764.f1.zip › Supplmentary_Files/105_casp11_domain/casp11_domain_AcconPred/T0820-D2.reso]

# AcconPred: three-state solvent accessibility prediction results 
# probabilities are in the order of B (Bury, pACC: 0-10), M (Medium, pACC: 11-40) and E (Exposed, pACC: 41-100), 
# where pACC is the relative solvent accessibility value calculated by DSSP 
# output format: <position> <one letter amino acid> <predicted label> ... <probabilities> ... -> <maximal probability> 

 1 R E 0.007331 0.044221 0.948447 -> 0.948447 
 2 D E 0.006886 0.101872 0.891242 -> 0.891242 
 3 I M 0.113728 0.534269 0.352003 -> 0.534269 
 4 V E 0.122596 0.354338 0.523066 -> 0.523066 
 5 L B 0.505056 0.424009 0.070935 -> 0.505056 
 6 S M 0.128364 0.538427 0.333210 -> 0.538427 
 7 A B 0.509842 0.371927 0.118231 -> 0.509842 
 8 K E 0.001382 0.080069 0.918549 -> 0.918549 
 9 E E 0.024943 0.486148 0.488909 -> 0.488909 
 10 L B 0.910745 0.079584 0.009671 -> 0.910745 
 11 S M 0.248667 0.592636 0.158697 -> 0.592636 
 12 E E 0.010640 0.177776 0.811584 -> 0.811584 
 13 W B 0.593153 0.380180 0.026667 -> 0.593153 
 14 L B 0.716582 0.270574 0.012844 -> 0.716582 
 15 Q E 0.003594 0.104739 0.891667 -> 0.891667 
 16 E E 0.002707 0.077764 0.919529 -> 0.919529 
 17 G E 0.065513 0.333335 0.601152 -> 0.601152 
 18 D E 0.034265 0.322527 0.643208 -> 0.643208 
 19 V B 0.503803 0.386151 0.110046 -> 0.503803 
 20 V B 0.704890 0.268288 0.026823 -> 0.704890 
 21 T M 0.186638 0.523317 0.290045 -> 0.523317 
 22 V B 0.818743 0.172911 0.008346 -> 0.818743 
 23 T M 0.088277 0.500790 0.410933 -> 0.500790 
 24 I B 0.775744 0.210982 0.013274 -> 0.775744 
 25 P E 0.039966 0.336209 0.623825 -> 0.623825 
 26 G E 0.039424 0.144173 0.816403 -> 0.816403 
 27 G M 0.157447 0.466296 0.376257 -> 0.466296 
 28 P E 0.034230 0.177828 0.787943 -> 0.787943 
 29 C M 0.344344 0.547934 0.107722 -> 0.547934 
 30 T E 0.082256 0.375250 0.542494 -> 0.542494 
 31 R E 0.019051 0.306231 0.674718 -> 0.674718 
 32 Y M 0.146571 0.559338 0.294090 -> 0.559338 
 33 R E 0.033947 0.415406 0.550646 -> 0.550646 
 34 I M 0.260334 0.422926 0.316740 -> 0.422926 
 35 L M 0.124673 0.527349 0.347978 -> 0.527349 
 36 E E 0.006169 0.052188 0.941643 -> 0.941643 
