# Supplementary material for: AcconPred: Predicting Solvent Accessibility and Contact Number Simultaneously by a Multitask Learning Framework under the Conditional Neural Fields Model
Source: Biomed Res Int. 2015 Aug 3;2015:678764. doi: 10.1155/2015/678764 (PMC4538422; doi:10.1155/2015/678764)
Supplement: Supplementary file 1 — Training/testing dataset as well as the CASP11 evaluation dataset could be found in the Supplementary Material. The CASP11 evaluation dataset contains all detailed results from SPINE-X, SANN, ACCpro5 and AcconPred. [file 678764.f1.zip › Supplmentary_Files/105_casp11_domain/casp11_domain_AcconPred/T0821-D1.reso]

# AcconPred: three-state solvent accessibility prediction results 
# probabilities are in the order of B (Bury, pACC: 0-10), M (Medium, pACC: 11-40) and E (Exposed, pACC: 41-100), 
# where pACC is the relative solvent accessibility value calculated by DSSP 
# output format: <position> <one letter amino acid> <predicted label> ... <probabilities> ... -> <maximal probability> 

 1 Q E 0.044341 0.132671 0.822988 -> 0.822988 
 2 S E 0.004110 0.105957 0.889933 -> 0.889933 
 3 Y M 0.202937 0.710713 0.086350 -> 0.710713 
 4 E E 0.006697 0.145486 0.847817 -> 0.847817 
 5 E M 0.031393 0.498826 0.469780 -> 0.498826 
 6 L B 0.689528 0.290615 0.019856 -> 0.689528 
 7 I B 0.557802 0.416454 0.025744 -> 0.557802 
 8 E E 0.004044 0.183503 0.812453 -> 0.812453 
 9 K M 0.072386 0.753214 0.174400 -> 0.753214 
 10 S B 0.982611 0.010479 0.006909 -> 0.982611 
 11 Y M 0.082992 0.764752 0.152256 -> 0.764752 
 12 D M 0.033819 0.510757 0.455424 -> 0.510757 
 13 F B 0.773588 0.210554 0.015857 -> 0.773588 
 14 V M 0.300673 0.631493 0.067834 -> 0.631493 
 15 D E 0.011196 0.148550 0.840254 -> 0.840254 
 16 K E 0.000893 0.086519 0.912588 -> 0.912588 
 17 G E 0.010093 0.052306 0.937601 -> 0.937601 
 18 D M 0.019771 0.596531 0.383698 -> 0.596531 
 19 L M 0.334414 0.622888 0.042699 -> 0.622888 
 20 V E 0.002661 0.032715 0.964624 -> 0.964624 
 21 S M 0.034201 0.572757 0.393042 -> 0.572757 
 22 A B 0.988223 0.009519 0.002258 -> 0.988223 
 23 E M 0.049099 0.803402 0.147500 -> 0.803402 
 24 E E 0.000378 0.053619 0.946003 -> 0.946003 
 25 S B 0.617588 0.376124 0.006288 -> 0.617588 
 26 L B 0.991617 0.007375 0.001007 -> 0.991617 
 27 K E 0.013617 0.354497 0.631885 -> 0.631885 
 28 A M 0.105598 0.681207 0.213196 -> 0.681207 
 29 A B 0.963930 0.031486 0.004584 -> 0.963930 
 30 M M 0.356408 0.605135 0.038458 -> 0.605135 
 31 R E 0.003072 0.051788 0.945140 -> 0.945140 
 32 K E 0.009374 0.202853 0.787773 -> 0.787773 
 33 E M 0.051235 0.607520 0.341245 -> 0.607520 
 34 P E 0.014998 0.068511 0.916491 -> 0.916491 
 35 A E 0.013068 0.061172 0.925759 -> 0.925759 
 36 N M 0.110010 0.707857 0.182133 -> 0.707857 
 37 P E 0.070037 0.241657 0.688306 -> 0.688306 
 38 L M 0.087525 0.458632 0.453843 -> 0.458632 
 39 N B 0.669693 0.294484 0.035823 -> 0.669693 
 40 Y B 0.539827 0.407220 0.052953 -> 0.539827 
 41 A B 0.416625 0.407474 0.175901 -> 0.416625 
 42 L B 0.898637 0.071827 0.029536 -> 0.898637 
 43 L B 0.881037 0.111667 0.007296 -> 0.881037 
 44 T B 0.604078 0.345382 0.050540 -> 0.604078 
 45 N B 0.610708 0.348424 0.040868 -> 0.610708 
 46 L B 0.778816 0.209771 0.011413 -> 0.778816 
 47 G B 0.954208 0.035810 0.009981 -> 0.954208 
 48 T B 0.529775 0.417896 0.052330 -> 0.529775 
 49 I B 0.913076 0.067717 0.019206 -> 0.913076 
 50 Q M 0.340422 0.585959 0.073619 -> 0.585959 
 51 R M 0.033348 0.523897 0.442755 -> 0.523897 
 52 R E 0.038441 0.333295 0.628263 -> 0.628263 
 53 Q E 0.055369 0.407813 0.536818 -> 0.536818 
 54 G E 0.007890 0.037361 0.954749 -> 0.954749 
 55 K E 0.014102 0.490615 0.495283 -> 0.495283 
 56 L M 0.353085 0.596448 0.050467 -> 0.596448 
 57 Q E 0.003351 0.047803 0.948846 -> 0.948846 
 58 E E 0.007625 0.342352 0.650023 -> 0.650023 
 59 A B 0.982421 0.014306 0.003272 -> 0.982421 
 60 L M 0.326723 0.637958 0.035319 -> 0.637958 
 61 I E 0.008227 0.142678 0.849095 -> 0.849095 
 62 S B 0.507243 0.483845 0.008912 -> 0.507243 
 63 Y B 0.903169 0.091713 0.005119 -> 0.903169 
 64 T M 0.072195 0.468930 0.458875 -> 0.468930 
 65 S M 0.069040 0.633499 0.297461 -> 0.633499 
 66 A B 0.931616 0.051590 0.016794 -> 0.931616 
 67 L M 0.276907 0.663487 0.059606 -> 0.663487 
 68 S E 0.004160 0.084658 0.911182 -> 0.911182 
 69 G E 0.016908 0.245481 0.737611 -> 0.737611 
 70 H M 0.075245 0.561623 0.363133 -> 0.561623 
 71 T E 0.088118 0.220638 0.691244 -> 0.691244 
 72 K E 0.005283 0.107012 0.887705 -> 0.887705 
 73 N M 0.151971 0.704426 0.143603 -> 0.704426 
 74 I M 0.349542 0.507276 0.143182 -> 0.507276 
 75 T M 0.109707 0.462041 0.428252 -> 0.462041 
 76 I B 0.842236 0.106167 0.051597 -> 0.842236 
 77 L B 0.817355 0.161453 0.021191 -> 0.817355 
 78 E M 0.303116 0.475399 0.221485 -> 0.475399 
 79 N M 0.460536 0.462134 0.077330 -> 0.462134 
 80 R B 0.530728 0.444930 0.024342 -> 0.530728 
 81 A B 0.962353 0.031044 0.006604 -> 0.962353 
 82 S M 0.381151 0.541423 0.077426 -> 0.541423 
 83 L B 0.900947 0.080155 0.018898 -> 0.900947 
 84 Y M 0.414557 0.554261 0.031182 -> 0.554261 
 85 T M 0.062322 0.542746 0.394932 -> 0.542746 
 86 E E 0.024656 0.288805 0.686539 -> 0.686539 
 87 L M 0.159262 0.625714 0.215025 -> 0.625714 
 88 G E 0.015950 0.038387 0.945662 -> 0.945662 
 89 E E 0.010631 0.460351 0.529018 -> 0.529018 
 90 T M 0.216395 0.681939 0.101666 -> 0.681939 
 91 E E 0.001917 0.035724 0.962359 -> 0.962359 
 92 K E 0.003744 0.252691 0.743566 -> 0.743566 
 93 A B 0.984087 0.012467 0.003447 -> 0.984087 
 94 L M 0.190286 0.767441 0.042273 -> 0.767441 
 95 N E 0.004382 0.169508 0.826110 -> 0.826110 
 96 D B 0.549045 0.443255 0.007700 -> 0.549045 
 97 Y B 0.965638 0.030526 0.003836 -> 0.965638 
 98 N M 0.065361 0.491652 0.442987 -> 0.491652 
 99 T M 0.055688 0.708481 0.235831 -> 0.708481 
 100 L B 0.974895 0.020005 0.005100 -> 0.974895 
 101 L M 0.366287 0.603564 0.030148 -> 0.603564 
 102 I E 0.003838 0.055232 0.940930 -> 0.940930 
 103 E E 0.005746 0.213794 0.780460 -> 0.780460 
 104 N M 0.156904 0.740608 0.102488 -> 0.740608 
 105 P E 0.048048 0.209065 0.742886 -> 0.742886 
 106 E E 0.002079 0.068121 0.929800 -> 0.929800 
 107 H M 0.227907 0.715199 0.056894 -> 0.715199 
 108 Q M 0.285360 0.508628 0.206012 -> 0.508628 
 109 E M 0.135018 0.575628 0.289354 -> 0.575628 
 110 A B 0.952785 0.032654 0.014561 -> 0.952785 
 111 L B 0.841782 0.149340 0.008879 -> 0.841782 
 112 Y B 0.500611 0.435039 0.064350 -> 0.500611 
 113 C B 0.824694 0.161655 0.013651 -> 0.824694 
 114 R B 0.738259 0.253995 0.007747 -> 0.738259 
 115 G B 0.979789 0.014313 0.005897 -> 0.979789 
 116 L M 0.427315 0.525881 0.046804 -> 0.525881 
 117 L B 0.927164 0.057871 0.014965 -> 0.927164 
 118 Y B 0.546332 0.431880 0.021787 -> 0.546332 
 119 I M 0.276644 0.575725 0.147631 -> 0.575725 
 120 Q E 0.098734 0.430227 0.471039 -> 0.471039 
 121 L M 0.394236 0.536696 0.069068 -> 0.536696 
 122 Q E 0.007018 0.055037 0.937945 -> 0.937945 
 123 N M 0.065269 0.693066 0.241665 -> 0.693066 
 124 Y M 0.230917 0.700373 0.068710 -> 0.700373 
 125 M E 0.007868 0.067488 0.924645 -> 0.924645 
 126 W M 0.072698 0.734250 0.193052 -> 0.734250 
 127 A B 0.980124 0.017646 0.002230 -> 0.980124 
 128 E M 0.041401 0.791433 0.167166 -> 0.791433 
 129 Q E 0.001346 0.078530 0.920123 -> 0.920123 
 130 D M 0.483576 0.509282 0.007141 -> 0.509282 
 131 F B 0.978403 0.019130 0.002467 -> 0.978403 
 132 D E 0.012908 0.464602 0.522490 -> 0.522490 
 133 K E 0.012893 0.465751 0.521355 -> 0.521355 
 134 I B 0.944970 0.048456 0.006574 -> 0.944970 
 135 L M 0.367481 0.580232 0.052287 -> 0.580232 
 136 E E 0.002440 0.047644 0.949916 -> 0.949916 
 137 V M 0.058497 0.485821 0.455682 -> 0.485821 
 138 N M 0.158622 0.616957 0.224421 -> 0.616957 
 139 E E 0.017327 0.168508 0.814165 -> 0.814165 
 140 K E 0.001802 0.081919 0.916280 -> 0.916280 
 141 S M 0.254668 0.635847 0.109484 -> 0.635847 
 142 V M 0.297125 0.459957 0.242918 -> 0.459957 
 143 R E 0.026952 0.379637 0.593411 -> 0.593411 
 144 A B 0.812185 0.084998 0.102817 -> 0.812185 
 145 R B 0.512459 0.430330 0.057211 -> 0.512459 
 146 L B 0.666060 0.255714 0.078227 -> 0.666060 
 147 G B 0.724836 0.243455 0.031709 -> 0.724836 
 148 H B 0.681401 0.300971 0.017628 -> 0.681401 
 149 A B 0.974474 0.018719 0.006807 -> 0.974474 
 150 I B 0.518909 0.442191 0.038901 -> 0.518909 
 151 L B 0.904215 0.078685 0.017101 -> 0.904215 
 152 E M 0.359453 0.555396 0.085151 -> 0.555396 
 153 K E 0.030655 0.429930 0.539415 -> 0.539415 
 154 M M 0.209086 0.500187 0.290726 -> 0.500187 
 155 R E 0.033935 0.334623 0.631443 -> 0.631443 
 156 G E 0.006983 0.051771 0.941246 -> 0.941246 
 157 N M 0.037948 0.660094 0.301958 -> 0.660094 
 158 Y M 0.142750 0.770709 0.086541 -> 0.770709 
 159 D E 0.002967 0.043152 0.953881 -> 0.953881 
 160 E M 0.016195 0.559800 0.424005 -> 0.559800 
 161 S B 0.973582 0.023137 0.003281 -> 0.973582 
 162 E M 0.046551 0.794455 0.158994 -> 0.794455 
 163 R E 0.000964 0.071826 0.927210 -> 0.927210 
 164 I B 0.603941 0.392824 0.003235 -> 0.603941 
 165 F B 0.985908 0.012311 0.001781 -> 0.985908 
 166 N M 0.029411 0.488584 0.482006 -> 0.488584 
 167 Y M 0.045724 0.624184 0.330092 -> 0.624184 
 168 L B 0.960231 0.033924 0.005844 -> 0.960231 
 169 I M 0.378435 0.586785 0.034779 -> 0.586785 
 170 S E 0.002453 0.066832 0.930715 -> 0.930715 
 171 E E 0.005530 0.142490 0.851981 -> 0.851981 
 172 M M 0.218251 0.719049 0.062700 -> 0.719049 
 173 P E 0.104145 0.312325 0.583531 -> 0.583531 
 174 R E 0.004233 0.100470 0.895298 -> 0.895298 
 175 D M 0.218046 0.676470 0.105483 -> 0.676470 
 176 W M 0.418502 0.510382 0.071116 -> 0.510382 
 177 I M 0.124639 0.481555 0.393805 -> 0.481555 
 178 L B 0.809399 0.139719 0.050882 -> 0.809399 
 179 Y B 0.776227 0.212294 0.011479 -> 0.776227 
 180 E M 0.365844 0.530318 0.103837 -> 0.530318 
 181 G B 0.584608 0.370324 0.045069 -> 0.584608 
 182 R B 0.620498 0.364142 0.015360 -> 0.620498 
 183 A B 0.984568 0.012481 0.002951 -> 0.984568 
 184 D M 0.260784 0.620159 0.119057 -> 0.620159 
 185 L B 0.920674 0.066010 0.013316 -> 0.920674 
 186 Y B 0.498669 0.478077 0.023254 -> 0.498669 
 187 F M 0.167807 0.675163 0.157030 -> 0.675163 
 188 M E 0.074444 0.385362 0.540195 -> 0.540195 
 189 M M 0.252696 0.530237 0.217067 -> 0.530237 
 190 G E 0.027074 0.058869 0.914057 -> 0.914057 
 191 K M 0.016018 0.516727 0.467255 -> 0.516727 
 192 N M 0.202717 0.681501 0.115782 -> 0.681501 
 193 A E 0.008858 0.059204 0.931938 -> 0.931938 
 194 R E 0.016456 0.448324 0.535220 -> 0.535220 
 195 A B 0.985044 0.011480 0.003477 -> 0.985044 
 196 M M 0.132629 0.785261 0.082110 -> 0.785261 
 197 A E 0.010856 0.234020 0.755125 -> 0.755125 
 198 D B 0.503671 0.488744 0.007585 -> 0.503671 
 199 I B 0.986356 0.011974 0.001670 -> 0.986356 
 200 E E 0.010396 0.422904 0.566700 -> 0.566700 
 201 K E 0.004780 0.344896 0.650324 -> 0.650324 
 202 V B 0.971844 0.022074 0.006082 -> 0.971844 
 203 F M 0.388685 0.577873 0.033442 -> 0.577873 
 204 T E 0.006648 0.057892 0.935460 -> 0.935460 
 205 E E 0.003920 0.185092 0.810988 -> 0.810988 
 206 S M 0.112389 0.580808 0.306804 -> 0.580808 
 207 E E 0.040399 0.343995 0.615606 -> 0.615606 
 208 P E 0.021893 0.112013 0.866094 -> 0.866094 
 209 T M 0.190948 0.705526 0.103525 -> 0.705526 
 210 A B 0.688427 0.246450 0.065123 -> 0.688427 
 211 N M 0.135582 0.574266 0.290151 -> 0.574266 
 212 L B 0.912780 0.050708 0.036512 -> 0.912780 
 213 Y B 0.718307 0.265617 0.016076 -> 0.718307 
 214 V B 0.616261 0.321763 0.061976 -> 0.616261 
 215 L B 0.575306 0.392313 0.032382 -> 0.575306 
 216 R B 0.509190 0.463013 0.027797 -> 0.509190 
 217 G B 0.921582 0.059375 0.019043 -> 0.921582 
 218 K M 0.111880 0.634546 0.253574 -> 0.634546 
 219 I B 0.890021 0.078513 0.031465 -> 0.890021 
 220 K M 0.299953 0.618131 0.081917 -> 0.618131 
 221 L M 0.227258 0.587991 0.184751 -> 0.587991 
 222 A E 0.144068 0.338668 0.517264 -> 0.517264 
 223 Q E 0.071231 0.462112 0.466657 -> 0.466657 
 224 Y E 0.056648 0.294652 0.648700 -> 0.648700 
 225 E M 0.040067 0.645434 0.314499 -> 0.645434 
 226 K E 0.014222 0.439772 0.546006 -> 0.546006 
 227 E E 0.004173 0.046265 0.949562 -> 0.949562 
 228 R M 0.032388 0.613890 0.353722 -> 0.613890 
 229 A B 0.977349 0.017371 0.005280 -> 0.977349 
 230 A M 0.197989 0.722393 0.079618 -> 0.722393 
 231 L E 0.006799 0.171807 0.821394 -> 0.821394 
 232 D B 0.641614 0.353648 0.004738 -> 0.641614 
 233 F B 0.972302 0.025435 0.002263 -> 0.972302 
 234 K E 0.002065 0.153366 0.844569 -> 0.844569 
 235 K M 0.017309 0.558968 0.423722 -> 0.558968 
 236 A B 0.990300 0.006194 0.003505 -> 0.990300 
 237 E M 0.053492 0.747968 0.198540 -> 0.747968 
 238 S E 0.005888 0.034659 0.959453 -> 0.959453 
 239 M M 0.123160 0.665337 0.211502 -> 0.665337 
 240 G E 0.065874 0.365849 0.568277 -> 0.568277 
 241 Y M 0.137812 0.538503 0.323685 -> 0.538503 
 242 N E 0.033736 0.206429 0.759835 -> 0.759835 
 243 K E 0.007457 0.398054 0.594489 -> 0.594489 
 244 E E 0.003490 0.068775 0.927734 -> 0.927734 
 245 V M 0.153305 0.702282 0.144413 -> 0.702282 
 246 I B 0.939259 0.040649 0.020093 -> 0.939259 
 247 K E 0.020978 0.485003 0.494018 -> 0.494018 
 248 E E 0.005067 0.223689 0.771244 -> 0.771244 
 249 L B 0.492470 0.473764 0.033767 -> 0.492470 
 250 L B 0.551503 0.399727 0.048769 -> 0.551503 
 251 K E 0.002369 0.087930 0.909701 -> 0.909701 
 252 L E 0.022063 0.230195 0.747742 -> 0.747742 
 253 T M 0.134916 0.590221 0.274862 -> 0.590221 
 254 M E 0.041810 0.267522 0.690667 -> 0.690667 
 255 N E 0.008449 0.106281 0.885270 -> 0.885270 
