# Supplementary material for: AcconPred: Predicting Solvent Accessibility and Contact Number Simultaneously by a Multitask Learning Framework under the Conditional Neural Fields Model
Source: Biomed Res Int. 2015 Aug 3;2015:678764. doi: 10.1155/2015/678764 (PMC4538422; doi:10.1155/2015/678764)
Supplement: Supplementary file 1 — Training/testing dataset as well as the CASP11 evaluation dataset could be found in the Supplementary Material. The CASP11 evaluation dataset contains all detailed results from SPINE-X, SANN, ACCpro5 and AcconPred. [file 678764.f1.zip › Supplmentary_Files/105_casp11_domain/casp11_domain_AcconPred/T0822-D1.reso]

# AcconPred: three-state solvent accessibility prediction results 
# probabilities are in the order of B (Bury, pACC: 0-10), M (Medium, pACC: 11-40) and E (Exposed, pACC: 41-100), 
# where pACC is the relative solvent accessibility value calculated by DSSP 
# output format: <position> <one letter amino acid> <predicted label> ... <probabilities> ... -> <maximal probability> 

 1 G E 0.009695 0.037583 0.952722 -> 0.952722 
 2 P E 0.005654 0.108787 0.885558 -> 0.885558 
 3 V E 0.045774 0.328084 0.626142 -> 0.626142 
 4 A E 0.021016 0.135315 0.843669 -> 0.843669 
 5 G E 0.072917 0.368751 0.558332 -> 0.558332 
 6 N E 0.048093 0.336466 0.615440 -> 0.615440 
 7 Y M 0.229446 0.618542 0.152012 -> 0.618542 
 8 V B 0.494001 0.355407 0.150592 -> 0.494001 
 9 H B 0.543444 0.379099 0.077457 -> 0.543444 
 10 D M 0.115382 0.484910 0.399708 -> 0.484910 
 11 F B 0.834745 0.156230 0.009025 -> 0.834745 
 12 T M 0.087282 0.510200 0.402518 -> 0.510200 
 13 A M 0.230722 0.427556 0.341721 -> 0.427556 
 14 N E 0.015636 0.129606 0.854758 -> 0.854758 
 15 G E 0.065778 0.278121 0.656102 -> 0.656102 
 16 T E 0.045289 0.328641 0.626070 -> 0.626070 
 17 S E 0.074208 0.290080 0.635712 -> 0.635712 
 18 S M 0.274053 0.511263 0.214685 -> 0.511263 
 19 S M 0.180798 0.471113 0.348088 -> 0.471113 
 20 F B 0.504596 0.428341 0.067063 -> 0.504596 
 21 Y B 0.648407 0.317090 0.034503 -> 0.648407 
 22 T M 0.335077 0.483765 0.181158 -> 0.483765 
 23 I B 0.776727 0.203573 0.019700 -> 0.776727 
 24 A M 0.195085 0.417674 0.387240 -> 0.417674 
 25 G M 0.368130 0.378268 0.253602 -> 0.378268 
 26 N E 0.074034 0.393906 0.532060 -> 0.532060 
 27 L M 0.256138 0.465954 0.277908 -> 0.465954 
 28 S E 0.145813 0.349596 0.504591 -> 0.504591 
 29 T E 0.074602 0.238842 0.686556 -> 0.686556 
 30 S E 0.072651 0.335746 0.591603 -> 0.591603 
 31 K E 0.006101 0.113855 0.880044 -> 0.880044 
 32 G B 0.421142 0.383870 0.194988 -> 0.421142 
 33 T E 0.084850 0.427815 0.487335 -> 0.487335 
 34 A B 0.563776 0.375660 0.060564 -> 0.563776 
 35 T E 0.043979 0.351465 0.604557 -> 0.604557 
 36 Y M 0.371363 0.553346 0.075291 -> 0.553346 
 37 N E 0.022159 0.228127 0.749714 -> 0.749714 
 38 G E 0.125927 0.284593 0.589480 -> 0.589480 
 39 K E 0.031116 0.303182 0.665703 -> 0.665703 
 40 T E 0.167344 0.368194 0.464463 -> 0.464463 
 41 L B 0.679053 0.288083 0.032864 -> 0.679053 
 42 T M 0.390998 0.425749 0.183253 -> 0.425749 
 43 Q M 0.283652 0.430816 0.285532 -> 0.430816 
 44 C B 0.629562 0.318088 0.052350 -> 0.629562 
 45 L B 0.837427 0.150532 0.012041 -> 0.837427 
 46 K M 0.099781 0.526068 0.374151 -> 0.526068 
 47 M B 0.592530 0.314674 0.092797 -> 0.592530 
 48 E M 0.095868 0.474823 0.429310 -> 0.474823 
 49 T E 0.088779 0.324611 0.586610 -> 0.586610 
 50 A M 0.156429 0.425071 0.418500 -> 0.425071 
 51 T M 0.184134 0.467241 0.348625 -> 0.467241 
 52 S M 0.108616 0.472496 0.418887 -> 0.472496 
 53 I B 0.747630 0.240299 0.012071 -> 0.747630 
 54 S M 0.046523 0.476880 0.476597 -> 0.476880 
 55 F B 0.764785 0.225555 0.009661 -> 0.764785 
 56 T E 0.045093 0.454144 0.500763 -> 0.500763 
 57 A B 0.692634 0.252439 0.054927 -> 0.692634 
 58 P E 0.075657 0.420381 0.503962 -> 0.503962 
 59 S E 0.037186 0.214200 0.748614 -> 0.748614 
 60 A E 0.019471 0.191066 0.789462 -> 0.789462 
 61 G B 0.533110 0.359882 0.107008 -> 0.533110 
 62 K E 0.022845 0.431421 0.545735 -> 0.545735 
 63 L B 0.957942 0.040826 0.001232 -> 0.957942 
 64 T M 0.455482 0.520103 0.024415 -> 0.520103 
 65 L B 0.962419 0.035420 0.002161 -> 0.962419 
 66 V B 0.825015 0.167021 0.007964 -> 0.825015 
 67 F B 0.930011 0.065203 0.004786 -> 0.930011 
 68 A B 0.590920 0.357368 0.051712 -> 0.590920 
 69 E E 0.065802 0.428312 0.505886 -> 0.505886 
 70 A E 0.120151 0.316462 0.563387 -> 0.563387 
 71 A E 0.055227 0.247167 0.697606 -> 0.697606 
 72 A M 0.321964 0.440595 0.237441 -> 0.440595 
 73 T E 0.047441 0.357339 0.595221 -> 0.595221 
 74 A B 0.622896 0.332396 0.044708 -> 0.622896 
 75 K E 0.008714 0.225900 0.765386 -> 0.765386 
 76 V B 0.730143 0.248851 0.021006 -> 0.730143 
 77 D E 0.020346 0.288870 0.690784 -> 0.690784 
 78 G E 0.041143 0.212380 0.746476 -> 0.746476 
 79 N E 0.023060 0.338863 0.638077 -> 0.638077 
 80 K E 0.004185 0.086483 0.909332 -> 0.909332 
 81 V M 0.284564 0.627166 0.088269 -> 0.627166 
 82 T E 0.058815 0.359194 0.581990 -> 0.581990 
 83 A M 0.230341 0.388608 0.381050 -> 0.388608 
 84 S E 0.090918 0.365750 0.543332 -> 0.543332 
 85 N E 0.088580 0.347577 0.563843 -> 0.563843 
 86 G B 0.646994 0.269300 0.083706 -> 0.646994 
 87 I B 0.525961 0.379539 0.094501 -> 0.525961 
 88 I B 0.779917 0.204978 0.015105 -> 0.779917 
 89 T M 0.255147 0.509955 0.234897 -> 0.509955 
 90 V B 0.861534 0.132785 0.005681 -> 0.861534 
 91 D E 0.048227 0.427773 0.523999 -> 0.523999 
 92 L B 0.765586 0.223330 0.011085 -> 0.765586 
 93 A E 0.039215 0.353463 0.607322 -> 0.607322 
 94 Q E 0.040980 0.179611 0.779409 -> 0.779409 
 95 G E 0.058433 0.262916 0.678651 -> 0.678651 
 96 A E 0.070864 0.299494 0.629642 -> 0.629642 
 97 H M 0.125307 0.632646 0.242047 -> 0.632646 
 98 T E 0.049690 0.348770 0.601539 -> 0.601539 
 99 I B 0.580559 0.393336 0.026105 -> 0.580559 
 100 T E 0.049651 0.446077 0.504271 -> 0.504271 
 101 K E 0.053106 0.306946 0.639948 -> 0.639948 
 102 A E 0.089892 0.322272 0.587836 -> 0.587836 
 103 D M 0.222245 0.529689 0.248065 -> 0.529689 
 104 A B 0.567603 0.256973 0.175424 -> 0.567603 
 105 C B 0.685335 0.257856 0.056809 -> 0.685335 
 106 N B 0.653178 0.304595 0.042227 -> 0.653178 
 107 L B 0.952623 0.040091 0.007287 -> 0.952623 
 108 F B 0.871812 0.114396 0.013792 -> 0.871812 
 109 Y B 0.522031 0.434037 0.043932 -> 0.522031 
 110 M B 0.871144 0.094901 0.033954 -> 0.871144 
 111 E M 0.125026 0.630887 0.244088 -> 0.630887 
 112 Y M 0.276462 0.532324 0.191214 -> 0.532324 
 113 A E 0.035121 0.373872 0.591007 -> 0.591007 
 114 A E 0.003230 0.031230 0.965540 -> 0.965540 
