# Supplementary material for: AcconPred: Predicting Solvent Accessibility and Contact Number Simultaneously by a Multitask Learning Framework under the Conditional Neural Fields Model
Source: Biomed Res Int. 2015 Aug 3;2015:678764. doi: 10.1155/2015/678764 (PMC4538422; doi:10.1155/2015/678764)
Supplement: Supplementary file 1 — Training/testing dataset as well as the CASP11 evaluation dataset could be found in the Supplementary Material. The CASP11 evaluation dataset contains all detailed results from SPINE-X, SANN, ACCpro5 and AcconPred. [file 678764.f1.zip › Supplmentary_Files/105_casp11_domain/casp11_domain_AcconPred/T0823-D1.reso]

# AcconPred: three-state solvent accessibility prediction results 
# probabilities are in the order of B (Bury, pACC: 0-10), M (Medium, pACC: 11-40) and E (Exposed, pACC: 41-100), 
# where pACC is the relative solvent accessibility value calculated by DSSP 
# output format: <position> <one letter amino acid> <predicted label> ... <probabilities> ... -> <maximal probability> 

 1 M E 0.009082 0.053787 0.937131 -> 0.937131 
 2 R E 0.008877 0.184178 0.806945 -> 0.806945 
 3 Y M 0.062655 0.519377 0.417968 -> 0.519377 
 4 R M 0.279596 0.575229 0.145175 -> 0.575229 
 5 P E 0.033388 0.235494 0.731119 -> 0.731119 
 6 F B 0.569456 0.344737 0.085807 -> 0.569456 
 7 G E 0.090621 0.311535 0.597844 -> 0.597844 
 8 S E 0.034830 0.221530 0.743640 -> 0.743640 
 9 T M 0.293231 0.462164 0.244605 -> 0.462164 
 10 G E 0.158371 0.358355 0.483274 -> 0.483274 
 11 V M 0.298927 0.520064 0.181009 -> 0.520064 
 12 A M 0.110649 0.472057 0.417294 -> 0.472057 
 13 V B 0.737904 0.243972 0.018124 -> 0.737904 
 14 S B 0.607308 0.341348 0.051344 -> 0.607308 
 15 A B 0.461804 0.416578 0.121619 -> 0.461804 
 16 L B 0.819309 0.148498 0.032193 -> 0.819309 
 17 T B 0.770977 0.210540 0.018483 -> 0.770977 
 18 L B 0.860642 0.126879 0.012479 -> 0.860642 
 19 R M 0.295302 0.531214 0.173483 -> 0.531214 
 20 L B 0.835767 0.144761 0.019472 -> 0.835767 
 21 A B 0.510614 0.378737 0.110648 -> 0.510614 
 22 D M 0.116478 0.480234 0.403288 -> 0.480234 
 23 N M 0.379387 0.471890 0.148723 -> 0.471890 
 24 P E 0.172488 0.289096 0.538416 -> 0.538416 
 25 R E 0.021329 0.171723 0.806947 -> 0.806947 
 26 L M 0.434717 0.532612 0.032672 -> 0.532612 
 27 R E 0.004408 0.174087 0.821505 -> 0.821505 
 28 A M 0.131901 0.508644 0.359455 -> 0.508644 
 29 N E 0.008498 0.092207 0.899295 -> 0.899295 
 30 D M 0.092437 0.675620 0.231943 -> 0.675620 
 31 W B 0.892553 0.104097 0.003350 -> 0.892553 
 32 R M 0.072985 0.790374 0.136642 -> 0.790374 
 33 A E 0.062983 0.425491 0.511527 -> 0.511527 
 34 L B 0.973839 0.024936 0.001226 -> 0.973839 
 35 V B 0.984076 0.014341 0.001583 -> 0.984076 
 36 F M 0.048790 0.652414 0.298797 -> 0.652414 
 37 T M 0.277861 0.662109 0.060030 -> 0.662109 
 38 A B 0.986023 0.009739 0.004238 -> 0.986023 
 39 L M 0.431780 0.520417 0.047803 -> 0.520417 
 40 E E 0.017576 0.264527 0.717897 -> 0.717897 
 41 N M 0.360237 0.501291 0.138472 -> 0.501291 
 42 G M 0.347332 0.349545 0.303123 -> 0.349545 
 43 V B 0.935136 0.061124 0.003740 -> 0.935136 
 44 N B 0.487297 0.476772 0.035931 -> 0.487297 
 45 S B 0.896222 0.096824 0.006954 -> 0.896222 
 46 F B 0.903866 0.090879 0.005255 -> 0.903866 
 47 Q B 0.499516 0.454694 0.045791 -> 0.499516 
 48 I B 0.912589 0.083576 0.003835 -> 0.912589 
 49 D B 0.734514 0.239586 0.025900 -> 0.734514 
 50 G M 0.267816 0.512323 0.219861 -> 0.512323 
 51 D M 0.218796 0.442013 0.339190 -> 0.442013 
 52 A B 0.528455 0.365230 0.106315 -> 0.528455 
 53 P M 0.191596 0.436124 0.372280 -> 0.436124 
 54 E E 0.022069 0.213547 0.764384 -> 0.764384 
 55 L B 0.565660 0.362689 0.071651 -> 0.565660 
 56 L B 0.523179 0.440610 0.036211 -> 0.523179 
 57 K E 0.003875 0.156352 0.839773 -> 0.839773 
 58 G M 0.447176 0.483273 0.069551 -> 0.483273 
 59 A B 0.903827 0.087811 0.008362 -> 0.903827 
 60 G M 0.285002 0.503827 0.211171 -> 0.503827 
 61 E E 0.006754 0.157155 0.836091 -> 0.836091 
 62 A B 0.710667 0.259123 0.030210 -> 0.710667 
 63 F B 0.599516 0.376313 0.024171 -> 0.599516 
 64 A E 0.043494 0.334444 0.622062 -> 0.622062 
 65 S E 0.014229 0.097858 0.887913 -> 0.887913 
 66 V M 0.280038 0.607270 0.112691 -> 0.607270 
 67 E E 0.057756 0.265405 0.676839 -> 0.676839 
 68 R M 0.242330 0.582913 0.174757 -> 0.582913 
 69 H E 0.085735 0.438378 0.475887 -> 0.475887 
 70 L M 0.397816 0.502465 0.099719 -> 0.502465 
 71 L B 0.926445 0.068023 0.005532 -> 0.926445 
 72 F B 0.686649 0.300823 0.012528 -> 0.686649 
 73 L B 0.972771 0.026198 0.001031 -> 0.972771 
 74 T B 0.876663 0.117930 0.005407 -> 0.876663 
 75 W B 0.726396 0.261272 0.012332 -> 0.726396 
 76 R M 0.325918 0.578561 0.095521 -> 0.578561 
 77 L B 0.734713 0.235481 0.029806 -> 0.734713 
 78 R M 0.072508 0.540911 0.386581 -> 0.540911 
 79 G E 0.071065 0.263760 0.665174 -> 0.665174 
 80 D E 0.044287 0.292259 0.663453 -> 0.663453 
 81 A M 0.323163 0.439563 0.237273 -> 0.439563 
 82 K E 0.010999 0.166375 0.822626 -> 0.822626 
 83 Q E 0.027747 0.182694 0.789558 -> 0.789558 
 84 L M 0.436856 0.520249 0.042895 -> 0.520249 
 85 G M 0.111496 0.485169 0.403335 -> 0.485169 
 86 P M 0.058642 0.483334 0.458025 -> 0.483334 
 87 H E 0.002873 0.054706 0.942421 -> 0.942421 
 88 T M 0.082947 0.697106 0.219947 -> 0.697106 
 89 L B 0.947578 0.040277 0.012145 -> 0.947578 
 90 D E 0.024410 0.485003 0.490588 -> 0.490588 
 91 A E 0.035748 0.220057 0.744195 -> 0.744195 
 92 L M 0.295272 0.611421 0.093307 -> 0.611421 
 93 K M 0.166553 0.628174 0.205273 -> 0.628174 
 94 R E 0.010372 0.161018 0.828610 -> 0.828610 
 95 S E 0.027602 0.391161 0.581237 -> 0.581237 
 96 A B 0.699954 0.279494 0.020552 -> 0.699954 
 97 F B 0.495008 0.479022 0.025970 -> 0.495008 
 98 E E 0.005498 0.051157 0.943345 -> 0.943345 
 99 G E 0.043444 0.394066 0.562489 -> 0.562489 
 100 L B 0.762772 0.218354 0.018874 -> 0.762772 
 101 S E 0.018904 0.217691 0.763405 -> 0.763405 
 102 L B 0.607867 0.380393 0.011740 -> 0.607867 
 103 D M 0.221891 0.532790 0.245319 -> 0.532790 
 104 Y M 0.256655 0.678479 0.064866 -> 0.678479 
 105 L B 0.954216 0.039199 0.006585 -> 0.954216 
 106 D B 0.688777 0.295688 0.015535 -> 0.688777 
 107 L B 0.974990 0.023503 0.001507 -> 0.974990 
 108 L B 0.963470 0.034659 0.001871 -> 0.963470 
 109 L B 0.943537 0.052315 0.004148 -> 0.943537 
 110 I B 0.959847 0.038077 0.002076 -> 0.959847 
 111 N B 0.819324 0.169027 0.011649 -> 0.819324 
 112 D M 0.434021 0.485142 0.080837 -> 0.485142 
 113 P B 0.574610 0.307593 0.117797 -> 0.574610 
 114 Q M 0.192746 0.460964 0.346289 -> 0.460964 
 115 S E 0.077667 0.309503 0.612830 -> 0.612830 
 116 A E 0.065465 0.200912 0.733623 -> 0.733623 
 117 S E 0.116298 0.413201 0.470502 -> 0.470502 
 118 L M 0.121544 0.522504 0.355952 -> 0.522504 
 119 P M 0.359721 0.437909 0.202370 -> 0.437909 
 120 M E 0.022716 0.198061 0.779223 -> 0.779223 
 121 A M 0.230456 0.513873 0.255670 -> 0.513873 
 122 F B 0.907556 0.085081 0.007363 -> 0.907556 
 123 E M 0.445677 0.480290 0.074032 -> 0.480290 
 124 S E 0.017784 0.209737 0.772479 -> 0.772479 
 125 G B 0.703530 0.287820 0.008650 -> 0.703530 
 126 L B 0.989550 0.009168 0.001282 -> 0.989550 
 127 Q M 0.023578 0.634604 0.341818 -> 0.634604 
 128 D M 0.026644 0.555190 0.418166 -> 0.555190 
 129 L B 0.974639 0.019561 0.005800 -> 0.974639 
 130 Q M 0.152688 0.717866 0.129445 -> 0.717866 
 131 K E 0.000563 0.007788 0.991648 -> 0.991648 
 132 G E 0.015933 0.189070 0.794997 -> 0.794997 
 133 R E 0.070836 0.398010 0.531153 -> 0.531153 
 134 A M 0.352246 0.541484 0.106270 -> 0.541484 
 135 L B 0.962185 0.036279 0.001536 -> 0.962185 
 136 R M 0.194503 0.644642 0.160855 -> 0.644642 
 137 G B 0.796059 0.188662 0.015279 -> 0.796059 
 138 L B 0.897376 0.098628 0.003995 -> 0.897376 
 139 G B 0.913595 0.081270 0.005135 -> 0.913595 
 140 V B 0.881431 0.103338 0.015231 -> 0.881431 
 141 A B 0.773719 0.201251 0.025030 -> 0.773719 
 142 S M 0.238259 0.462354 0.299387 -> 0.462354 
 143 R M 0.135316 0.504207 0.360477 -> 0.504207 
 144 G E 0.089289 0.376518 0.534193 -> 0.534193 
 145 D E 0.031385 0.230856 0.737759 -> 0.737759 
 146 I M 0.404809 0.503468 0.091722 -> 0.503468 
 147 D B 0.522884 0.374760 0.102355 -> 0.522884 
 148 P E 0.102754 0.347864 0.549382 -> 0.549382 
 149 G E 0.091997 0.293275 0.614728 -> 0.614728 
 150 L B 0.658608 0.311297 0.030095 -> 0.658608 
 151 L B 0.593344 0.334644 0.072012 -> 0.593344 
 152 A E 0.030202 0.117080 0.852719 -> 0.852719 
 153 N E 0.041375 0.346721 0.611905 -> 0.611905 
 154 D M 0.133105 0.504163 0.362732 -> 0.504163 
 155 L M 0.181027 0.575261 0.243712 -> 0.575261 
 156 V B 0.863819 0.129095 0.007085 -> 0.863819 
 157 T M 0.291371 0.562002 0.146627 -> 0.562002 
 158 A B 0.874082 0.117613 0.008305 -> 0.874082 
 159 V B 0.911292 0.081891 0.006817 -> 0.911292 
 160 S B 0.891257 0.100027 0.008716 -> 0.891257 
 161 S B 0.923164 0.070188 0.006648 -> 0.923164 
 162 P B 0.503609 0.381942 0.114449 -> 0.503609 
 163 Y B 0.646332 0.311057 0.042610 -> 0.646332 
 164 N B 0.615280 0.311035 0.073685 -> 0.615280 
 165 L B 0.687000 0.255419 0.057581 -> 0.687000 
 166 S B 0.406291 0.378120 0.215588 -> 0.406291 
 167 S M 0.325264 0.356297 0.318439 -> 0.356297 
 168 G M 0.313200 0.422334 0.264467 -> 0.422334 
 169 W M 0.223705 0.480606 0.295688 -> 0.480606 
 170 A B 0.427037 0.358382 0.214581 -> 0.427037 
 171 E B 0.481439 0.380790 0.137772 -> 0.481439 
 172 R E 0.036658 0.470376 0.492966 -> 0.492966 
 173 H M 0.053916 0.508988 0.437096 -> 0.508988 
 174 R M 0.420051 0.458349 0.121600 -> 0.458349 
 175 I B 0.788830 0.183556 0.027614 -> 0.788830 
 176 R E 0.005651 0.214512 0.779837 -> 0.779837 
 177 Q M 0.127889 0.636370 0.235741 -> 0.636370 
 178 A B 0.931625 0.056413 0.011963 -> 0.931625 
 179 S M 0.089271 0.544252 0.366476 -> 0.544252 
 180 Q E 0.001351 0.043949 0.954701 -> 0.954701 
 181 N M 0.041135 0.564229 0.394636 -> 0.564229 
 182 N E 0.026278 0.261297 0.712425 -> 0.712425 
 183 F B 0.688475 0.299173 0.012352 -> 0.688475 
 184 A B 0.766741 0.213045 0.020214 -> 0.766741 
 185 V B 0.893663 0.101412 0.004925 -> 0.893663 
 186 I B 0.833294 0.160520 0.006186 -> 0.833294 
 187 G B 0.911433 0.084097 0.004470 -> 0.911433 
 188 E M 0.329517 0.565534 0.104949 -> 0.565534 
 189 D M 0.323284 0.466515 0.210201 -> 0.466515 
 190 F M 0.390026 0.442848 0.167126 -> 0.442848 
 191 W B 0.685247 0.272328 0.042426 -> 0.685247 
 192 P E 0.212564 0.384931 0.402505 -> 0.402505 
 193 Q E 0.024206 0.194652 0.781143 -> 0.781143 
 194 A M 0.381482 0.400735 0.217784 -> 0.400735 
 195 L B 0.490355 0.406591 0.103054 -> 0.490355 
 196 R M 0.108033 0.494096 0.397871 -> 0.494096 
 197 E E 0.077921 0.352753 0.569326 -> 0.569326 
 198 P E 0.100614 0.369278 0.530108 -> 0.530108 
 199 S E 0.045313 0.203849 0.750838 -> 0.750838 
 200 F M 0.344001 0.523615 0.132385 -> 0.523615 
 201 W M 0.369740 0.472747 0.157512 -> 0.472747 
 202 Q E 0.066329 0.306734 0.626937 -> 0.626937 
 203 R E 0.041909 0.261258 0.696833 -> 0.696833 
 204 R M 0.098193 0.511759 0.390048 -> 0.511759 
 205 T E 0.092965 0.345819 0.561216 -> 0.561216 
 206 D E 0.054123 0.304920 0.640956 -> 0.640956 
 207 P E 0.114626 0.320307 0.565067 -> 0.565067 
 208 L B 0.386527 0.357372 0.256101 -> 0.386527 
 209 A E 0.054715 0.222590 0.722695 -> 0.722695 
 210 D E 0.022774 0.217284 0.759942 -> 0.759942 
 211 V M 0.324178 0.434626 0.241196 -> 0.434626 
 212 G E 0.080439 0.269425 0.650136 -> 0.650136 
 213 G M 0.269322 0.396182 0.334497 -> 0.396182 
 214 Y B 0.467179 0.458430 0.074391 -> 0.467179 
 215 E E 0.036572 0.347955 0.615473 -> 0.615473 
 216 F E 0.085386 0.451071 0.463543 -> 0.463543 
 217 L B 0.770720 0.211715 0.017565 -> 0.770720 
 218 T M 0.288195 0.490566 0.221239 -> 0.490566 
 219 N E 0.010375 0.073635 0.915990 -> 0.915990 
 220 T M 0.034843 0.544908 0.420249 -> 0.544908 
 221 P E 0.047194 0.420812 0.531994 -> 0.531994 
 222 G E 0.006157 0.099448 0.894395 -> 0.894395 
 223 W B 0.647057 0.346504 0.006438 -> 0.647057 
 224 S M 0.161440 0.460398 0.378162 -> 0.460398 
 225 A B 0.868399 0.118438 0.013163 -> 0.868399 
 226 E B 0.778877 0.215173 0.005950 -> 0.778877 
 227 D B 0.685747 0.295657 0.018596 -> 0.685747 
 228 I B 0.913756 0.071330 0.014915 -> 0.913756 
 229 C B 0.995137 0.004552 0.000311 -> 0.995137 
 230 L B 0.941828 0.050552 0.007620 -> 0.941828 
 231 G B 0.473640 0.452701 0.073660 -> 0.473640 
 232 Y B 0.576906 0.396075 0.027019 -> 0.576906 
 233 A B 0.927786 0.067487 0.004727 -> 0.927786 
 234 L M 0.394539 0.548923 0.056538 -> 0.548923 
 235 T E 0.066523 0.326525 0.606952 -> 0.606952 
 236 E M 0.062413 0.769843 0.167744 -> 0.769843 
 237 P E 0.017013 0.122835 0.860152 -> 0.860152 
 238 S E 0.083784 0.413553 0.502663 -> 0.502663 
 239 L B 0.670399 0.309720 0.019881 -> 0.670399 
 240 A B 0.536570 0.392628 0.070802 -> 0.536570 
 241 T B 0.763644 0.221800 0.014556 -> 0.763644 
 242 V B 0.836993 0.156437 0.006570 -> 0.836993 
 243 R B 0.451409 0.444327 0.104264 -> 0.451409 
 244 V B 0.829175 0.165940 0.004885 -> 0.829175 
 245 T M 0.311413 0.543263 0.145324 -> 0.543263 
 246 A B 0.894904 0.089397 0.015698 -> 0.894904 
 247 D E 0.039682 0.389691 0.570627 -> 0.570627 
 248 N M 0.040650 0.675642 0.283708 -> 0.675642 
 249 R E 0.012974 0.411250 0.575776 -> 0.575776 
 250 Q E 0.005954 0.089097 0.904949 -> 0.904949 
 251 E M 0.352406 0.621071 0.026524 -> 0.621071 
 252 I B 0.967624 0.025754 0.006622 -> 0.967624 
 253 E E 0.012899 0.459776 0.527325 -> 0.527325 
 254 R E 0.016627 0.419449 0.563923 -> 0.563923 
 255 L B 0.906019 0.088870 0.005111 -> 0.906019 
 256 A B 0.778553 0.212221 0.009227 -> 0.778553 
 257 A E 0.009873 0.165388 0.824739 -> 0.824739 
 258 V M 0.388859 0.542838 0.068304 -> 0.542838 
 259 V B 0.503707 0.441738 0.054555 -> 0.503707 
 260 E E 0.006512 0.121076 0.872412 -> 0.872412 
 261 R M 0.031267 0.637248 0.331485 -> 0.637248 
 262 D E 0.008305 0.107816 0.883879 -> 0.883879 
 263 L B 0.578296 0.401727 0.019976 -> 0.578296 
 264 P E 0.027507 0.265843 0.706650 -> 0.706650 
 265 T E 0.004039 0.058061 0.937900 -> 0.937900 
 266 G E 0.024111 0.123333 0.852556 -> 0.852556 
 267 V M 0.370138 0.529160 0.100702 -> 0.529160 
 268 C M 0.406183 0.460083 0.133734 -> 0.460083 
 269 A E 0.064100 0.218581 0.717319 -> 0.717319 
 270 Q E 0.060607 0.420252 0.519141 -> 0.519141 
 271 I B 0.533599 0.412191 0.054211 -> 0.533599 
 272 E M 0.111651 0.544436 0.343912 -> 0.544436 
 273 M E 0.173565 0.337175 0.489260 -> 0.489260 
 274 A B 0.431645 0.339915 0.228440 -> 0.431645 
 275 R M 0.172848 0.479376 0.347777 -> 0.479376 
 276 F B 0.444342 0.382430 0.173229 -> 0.444342 
 277 S E 0.144181 0.397137 0.458681 -> 0.458681 
 278 A B 0.379130 0.349004 0.271866 -> 0.379130 
 279 Q E 0.021492 0.270047 0.708461 -> 0.708461 
 280 E E 0.051524 0.326320 0.622156 -> 0.622156 
 281 R E 0.093169 0.431959 0.474872 -> 0.474872 
 282 E M 0.087115 0.463793 0.449093 -> 0.463793 
 283 K E 0.012971 0.161530 0.825499 -> 0.825499 
 284 A B 0.444586 0.266472 0.288942 -> 0.444586 
 285 A E 0.161439 0.369545 0.469016 -> 0.469016 
 286 R E 0.009147 0.115318 0.875535 -> 0.875535 
 287 R E 0.028866 0.339753 0.631381 -> 0.631381 
 288 P E 0.007614 0.076643 0.915743 -> 0.915743 
