# Supplementary material for: AcconPred: Predicting Solvent Accessibility and Contact Number Simultaneously by a Multitask Learning Framework under the Conditional Neural Fields Model
Source: Biomed Res Int. 2015 Aug 3;2015:678764. doi: 10.1155/2015/678764 (PMC4538422; doi:10.1155/2015/678764)
Supplement: Supplementary file 1 — Training/testing dataset as well as the CASP11 evaluation dataset could be found in the Supplementary Material. The CASP11 evaluation dataset contains all detailed results from SPINE-X, SANN, ACCpro5 and AcconPred. [file 678764.f1.zip › Supplmentary_Files/105_casp11_domain/casp11_domain_AcconPred/T0824-D1.reso]

# AcconPred: three-state solvent accessibility prediction results 
# probabilities are in the order of B (Bury, pACC: 0-10), M (Medium, pACC: 11-40) and E (Exposed, pACC: 41-100), 
# where pACC is the relative solvent accessibility value calculated by DSSP 
# output format: <position> <one letter amino acid> <predicted label> ... <probabilities> ... -> <maximal probability> 

 1 A E 0.003690 0.025643 0.970667 -> 0.970667 
 2 R E 0.004853 0.098645 0.896502 -> 0.896502 
 3 Y M 0.102259 0.555489 0.342252 -> 0.555489 
 4 D E 0.012459 0.182308 0.805233 -> 0.805233 
 5 D M 0.122528 0.579870 0.297602 -> 0.579870 
 6 V M 0.162274 0.562230 0.275496 -> 0.562230 
 7 L B 0.769024 0.205465 0.025510 -> 0.769024 
 8 Y M 0.039776 0.594749 0.365475 -> 0.594749 
 9 F B 0.831204 0.162810 0.005986 -> 0.831204 
 10 P M 0.079855 0.524296 0.395849 -> 0.524296 
 11 A M 0.201212 0.445167 0.353621 -> 0.445167 
 12 S E 0.039529 0.193670 0.766801 -> 0.766801 
 13 R E 0.055931 0.414893 0.529176 -> 0.529176 
 14 Y M 0.401467 0.525696 0.072837 -> 0.525696 
 15 P E 0.105924 0.393266 0.500810 -> 0.500810 
 16 E E 0.023557 0.200635 0.775809 -> 0.775809 
 17 T B 0.446434 0.430519 0.123046 -> 0.446434 
 18 G B 0.726994 0.204004 0.069002 -> 0.726994 
 19 A E 0.087728 0.246023 0.666249 -> 0.666249 
 20 H M 0.308746 0.525304 0.165950 -> 0.525304 
 21 I B 0.881928 0.106707 0.011365 -> 0.881928 
 22 S M 0.270394 0.605600 0.124006 -> 0.605600 
 23 D M 0.057201 0.522795 0.420003 -> 0.522795 
 24 A B 0.920296 0.067975 0.011729 -> 0.920296 
 25 I M 0.379435 0.518079 0.102485 -> 0.518079 
 26 K E 0.003406 0.050645 0.945949 -> 0.945949 
 27 A E 0.041430 0.240129 0.718441 -> 0.718441 
 28 G E 0.032615 0.104718 0.862667 -> 0.862667 
 29 H E 0.066279 0.404157 0.529564 -> 0.529564 
 30 A M 0.254709 0.375696 0.369595 -> 0.375696 
 31 D E 0.026034 0.255522 0.718443 -> 0.718443 
 32 V M 0.130586 0.467502 0.401912 -> 0.467502 
 33 C B 0.622091 0.323558 0.054351 -> 0.622091 
 34 T M 0.229652 0.510542 0.259805 -> 0.510542 
 35 I M 0.274392 0.556617 0.168990 -> 0.556617 
 36 E M 0.065519 0.484693 0.449788 -> 0.484693 
 37 R E 0.056111 0.420326 0.523563 -> 0.523563 
 38 S E 0.009719 0.048340 0.941942 -> 0.941942 
 39 G E 0.101122 0.334555 0.564323 -> 0.564323 
 40 A B 0.480296 0.366125 0.153579 -> 0.480296 
 41 D E 0.021759 0.217150 0.761092 -> 0.761092 
 42 K E 0.004769 0.062923 0.932308 -> 0.932308 
 43 R M 0.064155 0.524942 0.410904 -> 0.524942 
 44 R M 0.198241 0.608468 0.193291 -> 0.608468 
 45 Q E 0.012919 0.149065 0.838016 -> 0.838016 
 46 E E 0.010844 0.156021 0.833135 -> 0.833135 
 47 S B 0.427938 0.396821 0.175242 -> 0.427938 
 48 L B 0.408416 0.401650 0.189935 -> 0.408416 
 49 K E 0.005365 0.110912 0.883723 -> 0.883723 
 50 G E 0.010733 0.092043 0.897224 -> 0.897224 
 51 I M 0.194341 0.670297 0.135362 -> 0.670297 
 52 P E 0.075359 0.253528 0.671113 -> 0.671113 
 53 T E 0.087253 0.353985 0.558762 -> 0.558762 
 54 K E 0.015172 0.257047 0.727781 -> 0.727781 
 55 P E 0.009522 0.112727 0.877751 -> 0.877751 
 56 G E 0.040584 0.191224 0.768192 -> 0.768192 
 57 F M 0.223496 0.663970 0.112534 -> 0.663970 
 58 D E 0.063914 0.366670 0.569417 -> 0.569417 
 59 R M 0.076314 0.610057 0.313630 -> 0.610057 
 60 D E 0.080531 0.285898 0.633571 -> 0.633571 
 61 E M 0.220982 0.399877 0.379141 -> 0.399877 
 62 W B 0.532361 0.377072 0.090568 -> 0.532361 
 63 P M 0.395727 0.419221 0.185052 -> 0.419221 
 64 M B 0.424499 0.387097 0.188404 -> 0.424499 
 65 A B 0.426268 0.296374 0.277358 -> 0.426268 
 66 M B 0.461259 0.361197 0.177544 -> 0.461259 
 67 C B 0.611539 0.339195 0.049265 -> 0.611539 
 68 E E 0.033128 0.252603 0.714269 -> 0.714269 
 69 E E 0.052211 0.258642 0.689147 -> 0.689147 
 70 G E 0.171452 0.290163 0.538385 -> 0.538385 
 71 G E 0.229071 0.371955 0.398974 -> 0.398974 
 72 K E 0.014671 0.083938 0.901392 -> 0.901392 
 73 G E 0.062782 0.265092 0.672126 -> 0.672126 
 74 A B 0.570227 0.359043 0.070731 -> 0.570227 
 75 S E 0.150505 0.415704 0.433791 -> 0.433791 
 76 V M 0.462234 0.465528 0.072238 -> 0.465528 
 77 R M 0.064672 0.526831 0.408497 -> 0.526831 
 78 Y M 0.179416 0.634020 0.186564 -> 0.634020 
 79 V B 0.741984 0.225643 0.032373 -> 0.741984 
 80 S E 0.139243 0.425442 0.435316 -> 0.435316 
 81 S M 0.216775 0.448509 0.334716 -> 0.448509 
 82 S E 0.170196 0.360566 0.469238 -> 0.469238 
 83 D E 0.087605 0.340893 0.571502 -> 0.571502 
 84 N M 0.357220 0.456009 0.186771 -> 0.456009 
 85 R E 0.055155 0.268603 0.676243 -> 0.676243 
 86 G E 0.117401 0.261827 0.620772 -> 0.620772 
 87 A E 0.209603 0.385395 0.405002 -> 0.405002 
 88 G B 0.392341 0.301600 0.306059 -> 0.392341 
 89 S E 0.230624 0.350714 0.418662 -> 0.418662 
 90 W M 0.244831 0.494269 0.260901 -> 0.494269 
 91 V B 0.712110 0.226799 0.061091 -> 0.712110 
 92 G B 0.429136 0.404648 0.166215 -> 0.429136 
 93 N E 0.092829 0.323855 0.583315 -> 0.583315 
 94 R M 0.080127 0.516930 0.402942 -> 0.516930 
 95 L B 0.648133 0.311422 0.040445 -> 0.648133 
 96 N E 0.026091 0.214660 0.759248 -> 0.759248 
 97 G E 0.019231 0.090699 0.890071 -> 0.890071 
 98 Y M 0.300678 0.607604 0.091718 -> 0.607604 
 99 A E 0.073917 0.284017 0.642065 -> 0.642065 
 100 D E 0.010923 0.117998 0.871079 -> 0.871079 
 101 G M 0.187439 0.432378 0.380182 -> 0.432378 
 102 T M 0.280361 0.470815 0.248824 -> 0.470815 
 103 R M 0.144930 0.523634 0.331436 -> 0.523634 
 104 I B 0.811672 0.168746 0.019582 -> 0.811672 
 105 L M 0.164234 0.654132 0.181635 -> 0.654132 
 106 F B 0.674839 0.279464 0.045697 -> 0.674839 
 107 I E 0.094174 0.420951 0.484874 -> 0.484874 
 108 V E 0.009665 0.191708 0.798627 -> 0.798627 
