# Supplementary material for: AcconPred: Predicting Solvent Accessibility and Contact Number Simultaneously by a Multitask Learning Framework under the Conditional Neural Fields Model
Source: Biomed Res Int. 2015 Aug 3;2015:678764. doi: 10.1155/2015/678764 (PMC4538422; doi:10.1155/2015/678764)
Supplement: Supplementary file 1 — Training/testing dataset as well as the CASP11 evaluation dataset could be found in the Supplementary Material. The CASP11 evaluation dataset contains all detailed results from SPINE-X, SANN, ACCpro5 and AcconPred. [file 678764.f1.zip › Supplmentary_Files/105_casp11_domain/casp11_domain_AcconPred/T0827-D1.reso]

# AcconPred: three-state solvent accessibility prediction results 
# probabilities are in the order of B (Bury, pACC: 0-10), M (Medium, pACC: 11-40) and E (Exposed, pACC: 41-100), 
# where pACC is the relative solvent accessibility value calculated by DSSP 
# output format: <position> <one letter amino acid> <predicted label> ... <probabilities> ... -> <maximal probability> 

 1 S E 0.011224 0.069734 0.919042 -> 0.919042 
 2 P E 0.025376 0.122937 0.851686 -> 0.851686 
 3 R E 0.007196 0.108126 0.884679 -> 0.884679 
 4 S E 0.056750 0.378873 0.564377 -> 0.564377 
 5 R M 0.197814 0.623134 0.179051 -> 0.623134 
 6 S M 0.081407 0.494807 0.423786 -> 0.494807 
 7 T E 0.026327 0.446494 0.527180 -> 0.527180 
 8 L B 0.898026 0.084676 0.017298 -> 0.898026 
 9 L B 0.828110 0.157451 0.014440 -> 0.828110 
 10 K E 0.006386 0.274541 0.719073 -> 0.719073 
 11 R M 0.047970 0.701743 0.250287 -> 0.701743 
 12 L B 0.989465 0.007940 0.002595 -> 0.989465 
 13 A B 0.941405 0.049561 0.009034 -> 0.941405 
 14 D E 0.016148 0.329639 0.654214 -> 0.654214 
 15 V M 0.371927 0.527690 0.100383 -> 0.527690 
 16 V B 0.773953 0.204728 0.021320 -> 0.773953 
 17 C B 0.526072 0.365920 0.108008 -> 0.526072 
 18 L M 0.187734 0.507663 0.304603 -> 0.507663 
 19 P E 0.036896 0.248504 0.714600 -> 0.714600 
 20 S E 0.074877 0.324143 0.600980 -> 0.600980 
 21 S E 0.036582 0.165199 0.798219 -> 0.798219 
 22 R E 0.031712 0.286037 0.682251 -> 0.682251 
 23 I M 0.204619 0.607142 0.188239 -> 0.607142 
 24 N E 0.020972 0.243680 0.735348 -> 0.735348 
 25 A E 0.078607 0.206973 0.714420 -> 0.714420 
 26 F E 0.089515 0.351421 0.559064 -> 0.559064 
 27 E M 0.162180 0.588228 0.249592 -> 0.588228 
 28 R M 0.057536 0.552505 0.389958 -> 0.552505 
 29 S E 0.042435 0.238638 0.718926 -> 0.718926 
 30 M M 0.361792 0.580715 0.057493 -> 0.580715 
 31 T B 0.829028 0.145340 0.025632 -> 0.829028 
 32 A B 0.480856 0.436710 0.082435 -> 0.480856 
 33 D E 0.042404 0.415178 0.542418 -> 0.542418 
 34 L B 0.865061 0.125499 0.009439 -> 0.865061 
 35 L B 0.980729 0.015515 0.003756 -> 0.980729 
 36 V M 0.333211 0.585208 0.081580 -> 0.585208 
 37 E M 0.083702 0.680716 0.235583 -> 0.680716 
 38 M B 0.863635 0.130701 0.005664 -> 0.863635 
 39 L B 0.641798 0.344272 0.013931 -> 0.641798 
 40 R E 0.001858 0.085009 0.913133 -> 0.913133 
 41 D E 0.031234 0.459189 0.509577 -> 0.509577 
 42 A M 0.126348 0.475007 0.398646 -> 0.475007 
 43 N E 0.018939 0.298827 0.682234 -> 0.682234 
 44 V M 0.045983 0.524906 0.429112 -> 0.524906 
 45 G E 0.006863 0.147587 0.845550 -> 0.845550 
 46 E M 0.271228 0.493394 0.235378 -> 0.493394 
 47 R B 0.584923 0.389849 0.025228 -> 0.584923 
 48 E M 0.052502 0.567842 0.379656 -> 0.567842 
 49 K E 0.020520 0.461857 0.517623 -> 0.517623 
 50 V B 0.986705 0.010836 0.002459 -> 0.986705 
 51 A B 0.905148 0.089524 0.005328 -> 0.905148 
 52 R E 0.011973 0.272660 0.715368 -> 0.715368 
 53 R M 0.062104 0.750843 0.187053 -> 0.750843 
 54 L B 0.904247 0.090762 0.004991 -> 0.904247 
 55 A M 0.304948 0.554522 0.140530 -> 0.554522 
 56 M E 0.006193 0.113385 0.880421 -> 0.880421 
 57 L M 0.113171 0.797033 0.089795 -> 0.797033 
 58 N E 0.008519 0.085937 0.905544 -> 0.905544 
 59 E E 0.010766 0.166924 0.822310 -> 0.822310 
 60 M B 0.732023 0.251138 0.016839 -> 0.732023 
 61 P M 0.199063 0.602048 0.198889 -> 0.602048 
 62 G M 0.175304 0.517324 0.307372 -> 0.517324 
 63 V E 0.073701 0.388721 0.537578 -> 0.537578 
 64 L B 0.947010 0.034323 0.018667 -> 0.947010 
 65 V B 0.941547 0.055319 0.003134 -> 0.941547 
 66 R M 0.031501 0.524805 0.443694 -> 0.524805 
 67 L M 0.209535 0.687642 0.102823 -> 0.687642 
 68 L B 0.905207 0.087694 0.007099 -> 0.905207 
 69 L B 0.716356 0.270988 0.012656 -> 0.716356 
 70 R E 0.004939 0.140198 0.854863 -> 0.854863 
 71 D M 0.132623 0.648095 0.219282 -> 0.648095 
 72 E E 0.025636 0.359749 0.614615 -> 0.614615 
 73 L M 0.195638 0.670822 0.133541 -> 0.670822 
 74 P E 0.023605 0.215232 0.761163 -> 0.761163 
 75 V B 0.477631 0.423116 0.099253 -> 0.477631 
 76 A B 0.944913 0.049697 0.005390 -> 0.944913 
 77 R M 0.095492 0.666547 0.237961 -> 0.666547 
 78 A E 0.104129 0.352530 0.543340 -> 0.543340 
 79 L M 0.468652 0.490507 0.040842 -> 0.490507 
 80 L B 0.768846 0.214161 0.016993 -> 0.768846 
 81 V E 0.032516 0.388246 0.579237 -> 0.579237 
 82 D E 0.005488 0.122079 0.872433 -> 0.872433 
 83 S M 0.416436 0.542698 0.040866 -> 0.542698 
 84 E E 0.009364 0.108539 0.882097 -> 0.882097 
 85 K E 0.006031 0.101757 0.892211 -> 0.892211 
 86 L B 0.775537 0.217240 0.007223 -> 0.775537 
 87 S E 0.016245 0.313205 0.670550 -> 0.670550 
 88 D E 0.023544 0.318525 0.657931 -> 0.657931 
 89 A E 0.017635 0.184128 0.798237 -> 0.798237 
 90 D M 0.317194 0.605260 0.077546 -> 0.605260 
 91 L B 0.974523 0.022847 0.002630 -> 0.974523 
 92 I M 0.417634 0.539021 0.043345 -> 0.539021 
 93 S M 0.065670 0.600366 0.333964 -> 0.600366 
 94 C B 0.847812 0.143558 0.008630 -> 0.847812 
 95 L B 0.865739 0.121660 0.012601 -> 0.865739 
 96 Y E 0.011192 0.177100 0.811707 -> 0.811707 
 97 Q E 0.004743 0.183562 0.811694 -> 0.811694 
 98 A M 0.100127 0.506310 0.393564 -> 0.506310 
 99 T M 0.068539 0.579543 0.351918 -> 0.579543 
 100 T E 0.042887 0.295030 0.662083 -> 0.662083 
 101 E E 0.044784 0.365211 0.590004 -> 0.590004 
 102 H B 0.639958 0.336357 0.023685 -> 0.639958 
 103 R B 0.610714 0.343963 0.045323 -> 0.610714 
 104 R M 0.110021 0.604863 0.285116 -> 0.604863 
 105 L M 0.385869 0.523425 0.090707 -> 0.523425 
 106 I B 0.864208 0.128441 0.007351 -> 0.864208 
 107 A B 0.877978 0.098706 0.023315 -> 0.877978 
 108 Q E 0.038143 0.362624 0.599233 -> 0.599233 
 109 R M 0.188527 0.702214 0.109260 -> 0.702214 
 110 R E 0.004754 0.079578 0.915668 -> 0.915668 
 111 G E 0.016793 0.126054 0.857153 -> 0.857153 
 112 V B 0.651491 0.336550 0.011959 -> 0.651491 
 113 S E 0.045855 0.437804 0.516341 -> 0.516341 
 114 E E 0.010630 0.192833 0.796538 -> 0.796538 
 115 V E 0.014658 0.231729 0.753614 -> 0.753614 
 116 V B 0.883732 0.091243 0.025025 -> 0.883732 
 117 A B 0.764190 0.228828 0.006981 -> 0.764190 
 118 D E 0.028895 0.382849 0.588256 -> 0.588256 
 119 A M 0.377681 0.570497 0.051822 -> 0.570497 
 120 L B 0.949647 0.042672 0.007681 -> 0.949647 
 121 I M 0.220885 0.633615 0.145500 -> 0.633615 
 122 E E 0.003519 0.047822 0.948659 -> 0.948659 
 123 V M 0.095746 0.645329 0.258926 -> 0.645329 
 124 G E 0.031356 0.194122 0.774522 -> 0.774522 
 125 E M 0.039579 0.596637 0.363784 -> 0.596637 
 126 P E 0.019871 0.219001 0.761128 -> 0.761128 
 127 A E 0.007361 0.159501 0.833138 -> 0.833138 
 128 V B 0.797477 0.172562 0.029961 -> 0.797477 
 129 I B 0.751180 0.241755 0.007065 -> 0.751180 
 130 E M 0.093477 0.619931 0.286592 -> 0.619931 
 131 T M 0.148752 0.654318 0.196930 -> 0.654318 
 132 L B 0.866668 0.123999 0.009333 -> 0.866668 
 133 L B 0.678104 0.299428 0.022468 -> 0.678104 
 134 R E 0.001701 0.050945 0.947354 -> 0.947354 
 135 N M 0.199774 0.715211 0.085015 -> 0.715211 
 136 E E 0.002969 0.100598 0.896433 -> 0.896433 
 137 L E 0.015845 0.095657 0.888498 -> 0.888498 
 138 V M 0.461678 0.509680 0.028642 -> 0.509680 
 139 K E 0.002802 0.089867 0.907331 -> 0.907331 
 140 L B 0.636357 0.343940 0.019703 -> 0.636357 
 141 S M 0.238702 0.629527 0.131770 -> 0.629527 
 142 H E 0.019958 0.273385 0.706658 -> 0.706658 
 143 Q E 0.010130 0.189142 0.800728 -> 0.800728 
 144 G B 0.829591 0.137082 0.033327 -> 0.829591 
 145 V B 0.908935 0.086063 0.005001 -> 0.908935 
 146 E M 0.051497 0.520955 0.427547 -> 0.520955 
 147 N M 0.119585 0.701128 0.179287 -> 0.701128 
 148 I B 0.946186 0.047760 0.006053 -> 0.946186 
 149 V B 0.689574 0.304630 0.005796 -> 0.689574 
 150 A E 0.013608 0.157091 0.829301 -> 0.829301 
 151 A M 0.192034 0.532129 0.275836 -> 0.532129 
 152 T B 0.744179 0.238607 0.017214 -> 0.744179 
 153 R E 0.027812 0.305617 0.666571 -> 0.666571 
 154 D E 0.003193 0.084488 0.912319 -> 0.912319 
 155 A M 0.259055 0.652900 0.088046 -> 0.652900 
 156 Q E 0.013493 0.121926 0.864580 -> 0.864580 
 157 H E 0.025287 0.344851 0.629862 -> 0.629862 
 158 L B 0.937115 0.048336 0.014550 -> 0.937115 
 159 I B 0.685576 0.301899 0.012525 -> 0.685576 
 160 P E 0.060438 0.410200 0.529362 -> 0.529362 
 161 L M 0.239053 0.674154 0.086794 -> 0.674154 
 162 L B 0.941235 0.054311 0.004454 -> 0.941235 
 163 L M 0.435473 0.493181 0.071346 -> 0.493181 
 164 R E 0.000537 0.053508 0.945955 -> 0.945955 
 165 R M 0.175236 0.769092 0.055672 -> 0.769092 
 166 A E 0.014292 0.093398 0.892309 -> 0.892309 
 167 E E 0.006559 0.143598 0.849843 -> 0.849843 
 168 L B 0.717674 0.275281 0.007045 -> 0.717674 
 169 R E 0.005983 0.248801 0.745216 -> 0.745216 
 170 P E 0.018076 0.212771 0.769153 -> 0.769153 
 171 S E 0.017389 0.216402 0.766209 -> 0.766209 
 172 H B 0.514307 0.439392 0.046301 -> 0.514307 
 173 A B 0.870729 0.122264 0.007007 -> 0.870729 
 174 Y M 0.065837 0.528074 0.406089 -> 0.528074 
 175 V M 0.309357 0.576193 0.114450 -> 0.576193 
 176 M B 0.954617 0.037483 0.007900 -> 0.954617 
 177 F B 0.740349 0.241844 0.017807 -> 0.740349 
 178 W E 0.061289 0.325382 0.613329 -> 0.613329 
 179 W M 0.271669 0.566875 0.161456 -> 0.566875 
 180 A B 0.721979 0.232404 0.045617 -> 0.721979 
 181 D M 0.156531 0.679653 0.163816 -> 0.679653 
 182 S E 0.061766 0.288931 0.649303 -> 0.649303 
 183 E E 0.034077 0.363320 0.602602 -> 0.602602 
 184 A B 0.860716 0.111917 0.027367 -> 0.860716 
 185 R M 0.436737 0.508507 0.054756 -> 0.508507 
 186 R E 0.011303 0.263305 0.725391 -> 0.725391 
 187 V M 0.180136 0.753699 0.066165 -> 0.753699 
 188 I B 0.988175 0.009583 0.002242 -> 0.988175 
 189 L M 0.161725 0.576536 0.261739 -> 0.576536 
 190 Q E 0.001729 0.047013 0.951257 -> 0.951257 
 191 R E 0.034150 0.332237 0.633613 -> 0.633613 
 192 F M 0.231317 0.529275 0.239407 -> 0.529275 
 193 A E 0.017017 0.075480 0.907503 -> 0.907503 
