# Supplementary material for: AcconPred: Predicting Solvent Accessibility and Contact Number Simultaneously by a Multitask Learning Framework under the Conditional Neural Fields Model
Source: Biomed Res Int. 2015 Aug 3;2015:678764. doi: 10.1155/2015/678764 (PMC4538422; doi:10.1155/2015/678764)
Supplement: Supplementary file 1 — Training/testing dataset as well as the CASP11 evaluation dataset could be found in the Supplementary Material. The CASP11 evaluation dataset contains all detailed results from SPINE-X, SANN, ACCpro5 and AcconPred. [file 678764.f1.zip › Supplmentary_Files/105_casp11_domain/casp11_domain_AcconPred/T0827-D2.reso]

# AcconPred: three-state solvent accessibility prediction results 
# probabilities are in the order of B (Bury, pACC: 0-10), M (Medium, pACC: 11-40) and E (Exposed, pACC: 41-100), 
# where pACC is the relative solvent accessibility value calculated by DSSP 
# output format: <position> <one letter amino acid> <predicted label> ... <probabilities> ... -> <maximal probability> 

 1 V E 0.016317 0.070656 0.913026 -> 0.913026 
 2 S E 0.016768 0.154242 0.828990 -> 0.828990 
 3 R E 0.043899 0.430169 0.525932 -> 0.525932 
 4 E E 0.007149 0.164233 0.828617 -> 0.828617 
 5 I M 0.096990 0.638888 0.264122 -> 0.638888 
 6 L B 0.711313 0.245786 0.042901 -> 0.711313 
 7 Q M 0.042428 0.501890 0.455682 -> 0.501890 
 8 D E 0.007021 0.193646 0.799333 -> 0.799333 
 9 A B 0.581731 0.373426 0.044844 -> 0.581731 
 10 V B 0.782386 0.188084 0.029530 -> 0.782386 
 11 G E 0.055725 0.379238 0.565037 -> 0.565037 
 12 D E 0.010311 0.221093 0.768596 -> 0.768596 
 13 V B 0.739041 0.243202 0.017757 -> 0.739041 
 14 F B 0.542004 0.434534 0.023462 -> 0.542004 
 15 A E 0.036270 0.180102 0.783628 -> 0.783628 
 16 L E 0.063622 0.456715 0.479663 -> 0.479663 
 17 A B 0.765291 0.214246 0.020462 -> 0.765291 
 18 S E 0.118239 0.400600 0.481161 -> 0.481161 
 19 A E 0.079533 0.227391 0.693076 -> 0.693076 
 20 E E 0.007569 0.078705 0.913726 -> 0.913726 
 21 G E 0.019820 0.165780 0.814400 -> 0.814400 
 22 W M 0.118325 0.591817 0.289859 -> 0.591817 
 23 Q E 0.018015 0.135602 0.846382 -> 0.846382 
 24 D M 0.109327 0.506936 0.383737 -> 0.506936 
 25 P E 0.050488 0.198758 0.750754 -> 0.750754 
 26 L M 0.322918 0.456790 0.220292 -> 0.456790 
 27 S B 0.561599 0.359786 0.078615 -> 0.561599 
 28 R E 0.022377 0.330606 0.647017 -> 0.647017 
 29 K E 0.011398 0.274003 0.714599 -> 0.714599 
 30 A B 0.869748 0.109934 0.020318 -> 0.869748 
 31 L B 0.628178 0.307792 0.064030 -> 0.628178 
 32 Q E 0.022300 0.391040 0.586660 -> 0.586660 
 33 F M 0.394258 0.531166 0.074576 -> 0.531166 
 34 I B 0.546924 0.393905 0.059171 -> 0.546924 
 35 E E 0.039728 0.393148 0.567124 -> 0.567124 
 36 R E 0.064217 0.413248 0.522535 -> 0.522535 
 37 R M 0.200495 0.583005 0.216500 -> 0.583005 
 38 Q E 0.112257 0.290892 0.596851 -> 0.596851 
 39 R E 0.017551 0.249955 0.732494 -> 0.732494 
 40 N M 0.167562 0.417125 0.415313 -> 0.417125 
 41 R E 0.020459 0.252255 0.727286 -> 0.727286 
 42 A E 0.077387 0.300175 0.622437 -> 0.622437 
 43 A M 0.238613 0.400210 0.361176 -> 0.400210 
 44 I M 0.204071 0.435288 0.360640 -> 0.435288 
 45 A E 0.021795 0.142467 0.835737 -> 0.835737 
 46 K E 0.002399 0.063069 0.934532 -> 0.934532 
 47 S M 0.166947 0.656267 0.176786 -> 0.656267 
 48 P E 0.013093 0.158390 0.828516 -> 0.828516 
 49 F B 0.518574 0.419298 0.062128 -> 0.518574 
 50 N E 0.030456 0.372634 0.596910 -> 0.596910 
 51 S M 0.135570 0.618772 0.245658 -> 0.618772 
 52 L B 0.799878 0.185331 0.014791 -> 0.799878 
 53 D M 0.120605 0.533423 0.345971 -> 0.533423 
 54 E E 0.034199 0.429779 0.536022 -> 0.536022 
 55 A B 0.907518 0.081500 0.010982 -> 0.907518 
 56 V B 0.596606 0.366387 0.037007 -> 0.596606 
 57 A E 0.054013 0.293494 0.652494 -> 0.652494 
 58 A M 0.207827 0.549238 0.242935 -> 0.549238 
 59 G B 0.583704 0.287450 0.128845 -> 0.583704 
 60 E E 0.008432 0.167685 0.823883 -> 0.823883 
 61 G E 0.025815 0.131925 0.842260 -> 0.842260 
 62 G E 0.067043 0.348083 0.584874 -> 0.584874 
 63 F M 0.159038 0.543150 0.297812 -> 0.543150 
 64 N M 0.202082 0.629681 0.168237 -> 0.629681 
 65 R E 0.038947 0.376633 0.584420 -> 0.584420 
 66 E M 0.200078 0.566344 0.233577 -> 0.566344 
 67 I B 0.952990 0.039216 0.007794 -> 0.952990 
 68 A B 0.904273 0.078862 0.016865 -> 0.904273 
 69 E M 0.285440 0.476889 0.237671 -> 0.476889 
 70 E B 0.579926 0.309713 0.110361 -> 0.579926 
 71 I B 0.978897 0.017744 0.003359 -> 0.978897 
 72 S B 0.814686 0.147285 0.038029 -> 0.814686 
 73 Y M 0.159350 0.667022 0.173628 -> 0.667022 
 74 L B 0.530897 0.398535 0.070569 -> 0.530897 
 75 S M 0.395169 0.538957 0.065874 -> 0.538957 
 76 G E 0.011965 0.123014 0.865021 -> 0.865021 
 77 L B 0.678309 0.293086 0.028605 -> 0.678309 
 78 K E 0.004700 0.138914 0.856385 -> 0.856385 
 79 P M 0.181391 0.573906 0.244703 -> 0.573906 
 80 M E 0.059166 0.396938 0.543895 -> 0.543895 
 81 T M 0.255198 0.555213 0.189589 -> 0.555213 
 82 G B 0.882992 0.106640 0.010368 -> 0.882992 
 83 A M 0.131985 0.466678 0.401337 -> 0.466678 
 84 K E 0.013999 0.244639 0.741362 -> 0.741362 
 85 I B 0.694200 0.273046 0.032754 -> 0.694200 
 86 F B 0.720801 0.257747 0.021452 -> 0.720801 
 87 T E 0.035966 0.222593 0.741440 -> 0.741440 
 88 D M 0.057032 0.754648 0.188320 -> 0.754648 
 89 P E 0.014110 0.108170 0.877720 -> 0.877720 
 90 G E 0.043280 0.328193 0.628528 -> 0.628528 
 91 G B 0.471043 0.438889 0.090068 -> 0.471043 
 92 E M 0.341308 0.507500 0.151192 -> 0.507500 
 93 P B 0.826003 0.157979 0.016017 -> 0.826003 
 94 L B 0.930592 0.065305 0.004103 -> 0.930592 
 95 A B 0.939584 0.056007 0.004409 -> 0.939584 
 96 I B 0.964842 0.031761 0.003397 -> 0.964842 
 97 L B 0.980727 0.018084 0.001189 -> 0.980727 
 98 C B 0.960768 0.036687 0.002545 -> 0.960768 
 99 K M 0.352455 0.531323 0.116223 -> 0.531323 
 100 A B 0.815082 0.165825 0.019093 -> 0.815082 
 101 T M 0.264898 0.563885 0.171217 -> 0.563885 
 102 G E 0.017368 0.170497 0.812135 -> 0.812135 
 103 L B 0.724217 0.263935 0.011848 -> 0.724217 
 104 P E 0.021655 0.279594 0.698752 -> 0.698752 
 105 R M 0.022572 0.527349 0.450079 -> 0.527349 
 106 G E 0.084378 0.347349 0.568273 -> 0.568273 
 107 C B 0.633021 0.344368 0.022611 -> 0.633021 
 108 V B 0.959156 0.035939 0.004905 -> 0.959156 
 109 R M 0.076526 0.693491 0.229983 -> 0.693491 
 110 Q M 0.110525 0.496506 0.392969 -> 0.496506 
 111 L B 0.880975 0.105491 0.013533 -> 0.880975 
 112 W B 0.643995 0.332589 0.023416 -> 0.643995 
 113 R E 0.018742 0.250791 0.730467 -> 0.730467 
 114 G E 0.206102 0.367739 0.426160 -> 0.426160 
 115 L M 0.302869 0.538825 0.158305 -> 0.538825 
 116 R E 0.071121 0.303700 0.625180 -> 0.625180 
 117 R E 0.071320 0.435062 0.493618 -> 0.493618 
 118 T E 0.056530 0.236888 0.706582 -> 0.706582 
 119 D E 0.044382 0.333575 0.622043 -> 0.622043 
 120 P E 0.021481 0.140611 0.837907 -> 0.837907 
 121 N M 0.064713 0.655090 0.280197 -> 0.655090 
 122 L B 0.626918 0.344467 0.028614 -> 0.626918 
 123 E E 0.009577 0.196440 0.793984 -> 0.793984 
 124 R E 0.019375 0.386621 0.594004 -> 0.594004 
 125 V B 0.958046 0.036779 0.005175 -> 0.958046 
 126 L M 0.349478 0.597599 0.052923 -> 0.597599 
 127 T E 0.011659 0.193904 0.794437 -> 0.794437 
 128 V M 0.313294 0.617289 0.069417 -> 0.617289 
 129 Y B 0.699935 0.278235 0.021830 -> 0.699935 
 130 D E 0.021367 0.166049 0.812584 -> 0.812584 
 131 A E 0.055255 0.269341 0.675404 -> 0.675404 
 132 I B 0.720102 0.255396 0.024502 -> 0.720102 
 133 A M 0.201012 0.604116 0.194872 -> 0.604116 
 134 V E 0.039454 0.395980 0.564567 -> 0.564567 
 135 D E 0.017914 0.183578 0.798508 -> 0.798508 
 136 R M 0.042333 0.523052 0.434615 -> 0.523052 
 137 A B 0.943375 0.042468 0.014157 -> 0.943375 
 138 Q M 0.255280 0.610044 0.134675 -> 0.610044 
 139 T M 0.281031 0.555953 0.163016 -> 0.555953 
 140 V B 0.919451 0.069447 0.011102 -> 0.919451 
 141 L B 0.969354 0.021919 0.008728 -> 0.969354 
 142 R M 0.127552 0.550451 0.321997 -> 0.550451 
 143 Y M 0.293020 0.467933 0.239047 -> 0.467933 
 144 W B 0.630981 0.327290 0.041729 -> 0.630981 
 145 N M 0.114596 0.523437 0.361967 -> 0.523437 
 146 W M 0.310656 0.398666 0.290678 -> 0.398666 
 147 S M 0.154014 0.453586 0.392400 -> 0.453586 
 148 L E 0.160570 0.403543 0.435887 -> 0.435887 
 149 T E 0.056797 0.252121 0.691082 -> 0.691082 
 150 S E 0.007352 0.070798 0.921850 -> 0.921850 
