# Supplementary material for: AcconPred: Predicting Solvent Accessibility and Contact Number Simultaneously by a Multitask Learning Framework under the Conditional Neural Fields Model
Source: Biomed Res Int. 2015 Aug 3;2015:678764. doi: 10.1155/2015/678764 (PMC4538422; doi:10.1155/2015/678764)
Supplement: Supplementary file 1 — Training/testing dataset as well as the CASP11 evaluation dataset could be found in the Supplementary Material. The CASP11 evaluation dataset contains all detailed results from SPINE-X, SANN, ACCpro5 and AcconPred. [file 678764.f1.zip › Supplmentary_Files/105_casp11_domain/casp11_domain_AcconPred/T0829-D1.reso]

# AcconPred: three-state solvent accessibility prediction results 
# probabilities are in the order of B (Bury, pACC: 0-10), M (Medium, pACC: 11-40) and E (Exposed, pACC: 41-100), 
# where pACC is the relative solvent accessibility value calculated by DSSP 
# output format: <position> <one letter amino acid> <predicted label> ... <probabilities> ... -> <maximal probability> 

 1 Q E 0.002635 0.026709 0.970656 -> 0.970656 
 2 R E 0.011002 0.227695 0.761303 -> 0.761303 
 3 Q E 0.008025 0.189560 0.802415 -> 0.802415 
 4 P E 0.009398 0.123006 0.867596 -> 0.867596 
 5 V B 0.489696 0.463278 0.047026 -> 0.489696 
 6 S E 0.024983 0.223471 0.751546 -> 0.751546 
 7 S M 0.357539 0.513562 0.128899 -> 0.513562 
 8 S E 0.148507 0.418523 0.432970 -> 0.432970 
 9 R E 0.053813 0.462003 0.484183 -> 0.484183 
 10 I B 0.868567 0.121764 0.009669 -> 0.868567 
 11 L M 0.149275 0.596523 0.254202 -> 0.596523 
 12 S B 0.632139 0.308136 0.059725 -> 0.632139 
 13 I B 0.801443 0.177044 0.021514 -> 0.801443 
 14 G B 0.655177 0.301909 0.042915 -> 0.655177 
 15 Y B 0.690975 0.290699 0.018326 -> 0.690975 
 16 D M 0.448747 0.503522 0.047731 -> 0.503522 
 17 P E 0.040613 0.303794 0.655593 -> 0.655593 
 18 D E 0.003643 0.151557 0.844800 -> 0.844800 
 19 N E 0.043598 0.258745 0.697658 -> 0.697658 
 20 R E 0.026524 0.425263 0.548213 -> 0.548213 
 21 M M 0.162144 0.738665 0.099192 -> 0.738665 
 22 L B 0.953478 0.039147 0.007375 -> 0.953478 
 23 E M 0.336806 0.626176 0.037018 -> 0.626176 
 24 I B 0.983213 0.015876 0.000911 -> 0.983213 
 25 Q M 0.154939 0.779642 0.065418 -> 0.779642 
 26 F B 0.942798 0.053877 0.003324 -> 0.942798 
 27 R E 0.012641 0.440924 0.546435 -> 0.546435 
 28 E E 0.020133 0.178822 0.801044 -> 0.801044 
 29 Q E 0.004359 0.094713 0.900928 -> 0.900928 
 30 G M 0.176745 0.455346 0.367909 -> 0.455346 
 31 T M 0.285596 0.537486 0.176918 -> 0.537486 
 32 Y M 0.382202 0.549207 0.068591 -> 0.549207 
 33 Q M 0.099824 0.611292 0.288884 -> 0.611292 
 34 Y B 0.668803 0.312129 0.019068 -> 0.668803 
 35 L M 0.072071 0.531323 0.396607 -> 0.531323 
 36 G E 0.009030 0.121548 0.869422 -> 0.869422 
 37 V B 0.568315 0.388981 0.042704 -> 0.568315 
 38 P E 0.055274 0.416581 0.528145 -> 0.528145 
 39 E E 0.006868 0.219115 0.774018 -> 0.774018 
 40 R E 0.004863 0.137265 0.857872 -> 0.857872 
 41 A B 0.524544 0.426273 0.049183 -> 0.524544 
 42 H B 0.708069 0.277810 0.014121 -> 0.708069 
 43 Q E 0.029877 0.361648 0.608475 -> 0.608475 
 44 N E 0.040651 0.448962 0.510387 -> 0.510387 
 45 F B 0.888570 0.100857 0.010573 -> 0.888570 
 46 M M 0.300950 0.580298 0.118753 -> 0.580298 
 47 S E 0.025456 0.156488 0.818057 -> 0.818057 
 48 A B 0.567873 0.395337 0.036790 -> 0.567873 
 49 V E 0.010589 0.112951 0.876460 -> 0.876460 
 50 S M 0.122177 0.515891 0.361932 -> 0.515891 
 51 K E 0.022445 0.310461 0.667094 -> 0.667094 
 52 G E 0.176225 0.327971 0.495804 -> 0.495804 
 53 R E 0.022170 0.273586 0.704244 -> 0.704244 
 54 F B 0.447336 0.395354 0.157310 -> 0.447336 
 55 F B 0.759930 0.208969 0.031102 -> 0.759930 
 56 D M 0.117069 0.506560 0.376371 -> 0.506560 
 57 G E 0.131106 0.386800 0.482094 -> 0.482094 
 58 V M 0.308787 0.574335 0.116878 -> 0.574335 
 59 I B 0.882522 0.106224 0.011254 -> 0.882522 
 60 K E 0.025429 0.363868 0.610703 -> 0.610703 
 61 G E 0.035631 0.144921 0.819448 -> 0.819448 
 62 K E 0.005557 0.154007 0.840436 -> 0.840436 
 63 F M 0.403021 0.510768 0.086211 -> 0.510768 
 64 L E 0.026294 0.267136 0.706571 -> 0.706571 
 65 C M 0.240518 0.576382 0.183100 -> 0.576382 
 66 R E 0.011232 0.186645 0.802123 -> 0.802123 
 67 K E 0.002634 0.035496 0.961870 -> 0.961870 
