# Supplementary material for: AcconPred: Predicting Solvent Accessibility and Contact Number Simultaneously by a Multitask Learning Framework under the Conditional Neural Fields Model
Source: Biomed Res Int. 2015 Aug 3;2015:678764. doi: 10.1155/2015/678764 (PMC4538422; doi:10.1155/2015/678764)
Supplement: Supplementary file 1 — Training/testing dataset as well as the CASP11 evaluation dataset could be found in the Supplementary Material. The CASP11 evaluation dataset contains all detailed results from SPINE-X, SANN, ACCpro5 and AcconPred. [file 678764.f1.zip › Supplmentary_Files/105_casp11_domain/casp11_domain_AcconPred/T0830-D1.reso]

# AcconPred: three-state solvent accessibility prediction results 
# probabilities are in the order of B (Bury, pACC: 0-10), M (Medium, pACC: 11-40) and E (Exposed, pACC: 41-100), 
# where pACC is the relative solvent accessibility value calculated by DSSP 
# output format: <position> <one letter amino acid> <predicted label> ... <probabilities> ... -> <maximal probability> 

 1 A E 0.004234 0.039705 0.956060 -> 0.956060 
 2 T E 0.041151 0.381650 0.577199 -> 0.577199 
 3 G B 0.414175 0.404011 0.181814 -> 0.414175 
 4 W B 0.596259 0.359045 0.044696 -> 0.596259 
 5 V B 0.890564 0.088996 0.020440 -> 0.890564 
 6 V B 0.970083 0.025065 0.004852 -> 0.970083 
 7 L B 0.985258 0.013048 0.001694 -> 0.985258 
 8 F B 0.985117 0.012666 0.002217 -> 0.985117 
 9 V B 0.991861 0.007485 0.000654 -> 0.991861 
 10 A B 0.992886 0.006349 0.000766 -> 0.992886 
 11 V B 0.994951 0.004770 0.000278 -> 0.994951 
 12 A B 0.991272 0.008182 0.000546 -> 0.991272 
 13 L B 0.990966 0.008308 0.000726 -> 0.990966 
 14 V B 0.984883 0.013937 0.001180 -> 0.984883 
 15 V B 0.979243 0.018640 0.002116 -> 0.979243 
 16 W B 0.807267 0.184367 0.008366 -> 0.807267 
 17 F B 0.976216 0.018070 0.005714 -> 0.976216 
 18 V B 0.757126 0.213588 0.029285 -> 0.757126 
 19 S B 0.593847 0.328580 0.077573 -> 0.593847 
 20 L B 0.759038 0.220182 0.020780 -> 0.759038 
 21 D B 0.469424 0.394832 0.135744 -> 0.469424 
 22 M B 0.644099 0.275031 0.080870 -> 0.644099 
 23 R M 0.222859 0.532537 0.244605 -> 0.532537 
 24 H M 0.300850 0.444353 0.254797 -> 0.444353 
 25 L B 0.640157 0.271455 0.088388 -> 0.640157 
 26 V B 0.615902 0.261518 0.122580 -> 0.615902 
 27 G B 0.603244 0.301312 0.095444 -> 0.603244 
 28 P B 0.452010 0.408260 0.139730 -> 0.452010 
 29 D B 0.789814 0.159933 0.050253 -> 0.789814 
 30 E B 0.851532 0.131588 0.016880 -> 0.851532 
 31 G B 0.943320 0.033660 0.023020 -> 0.943320 
 32 R B 0.557434 0.399450 0.043116 -> 0.557434 
 33 Y B 0.742950 0.244713 0.012337 -> 0.742950 
 34 A B 0.958741 0.035356 0.005903 -> 0.958741 
 35 E M 0.406805 0.492160 0.101035 -> 0.492160 
 36 I B 0.953520 0.041719 0.004761 -> 0.953520 
 37 S B 0.988534 0.009716 0.001750 -> 0.988534 
 38 R M 0.302179 0.635118 0.062703 -> 0.635118 
 39 E M 0.188196 0.633081 0.178723 -> 0.633081 
 40 M B 0.900334 0.088837 0.010829 -> 0.900334 
 41 F B 0.610939 0.360374 0.028686 -> 0.610939 
 42 A E 0.033719 0.263631 0.702650 -> 0.702650 
 43 S E 0.048445 0.330201 0.621354 -> 0.621354 
 44 G M 0.120941 0.441746 0.437313 -> 0.441746 
 45 D M 0.169015 0.477640 0.353345 -> 0.477640 
 46 W M 0.454419 0.461093 0.084488 -> 0.461093 
 47 V B 0.829619 0.158202 0.012179 -> 0.829619 
 48 T B 0.787884 0.185614 0.026502 -> 0.787884 
 49 I B 0.970624 0.027325 0.002052 -> 0.970624 
 50 R M 0.348746 0.561907 0.089347 -> 0.561907 
 51 Y B 0.639241 0.330522 0.030236 -> 0.639241 
 52 N M 0.400002 0.456105 0.143893 -> 0.456105 
 53 A E 0.295340 0.284520 0.420140 -> 0.420140 
 54 L M 0.313735 0.514617 0.171649 -> 0.514617 
 55 K E 0.056897 0.359050 0.584053 -> 0.584053 
 56 Y M 0.268132 0.555881 0.175987 -> 0.555881 
 57 F B 0.601785 0.332643 0.065572 -> 0.601785 
 58 E M 0.108266 0.514966 0.376768 -> 0.514966 
 59 K M 0.350437 0.499903 0.149660 -> 0.499903 
 60 P B 0.886965 0.088117 0.024918 -> 0.886965 
 61 P B 0.907961 0.074476 0.017563 -> 0.907961 
 62 F B 0.945931 0.050607 0.003462 -> 0.945931 
 63 H B 0.850268 0.139739 0.009993 -> 0.850268 
 64 M B 0.834462 0.155167 0.010371 -> 0.834462 
 65 W B 0.902311 0.091713 0.005976 -> 0.902311 
 66 V B 0.989852 0.009178 0.000970 -> 0.989852 
 67 T B 0.888120 0.096934 0.014947 -> 0.888120 
 68 V B 0.879288 0.101162 0.019550 -> 0.879288 
 69 V B 0.980868 0.015648 0.003484 -> 0.980868 
 70 G B 0.968420 0.030111 0.001470 -> 0.968420 
 71 Y B 0.603165 0.363710 0.033125 -> 0.603165 
 72 E B 0.505135 0.453584 0.041281 -> 0.505135 
 73 L B 0.875591 0.117298 0.007110 -> 0.875591 
 74 F B 0.864593 0.124377 0.011030 -> 0.864593 
 75 G B 0.709389 0.253100 0.037511 -> 0.709389 
 76 L B 0.661030 0.310962 0.028008 -> 0.661030 
 77 G B 0.636527 0.318257 0.045216 -> 0.636527 
 78 E B 0.616283 0.351446 0.032271 -> 0.616283 
 79 W B 0.898156 0.094449 0.007395 -> 0.898156 
 80 Q B 0.980700 0.016990 0.002309 -> 0.980700 
 81 A B 0.956358 0.038870 0.004772 -> 0.956358 
 82 R B 0.626004 0.357403 0.016593 -> 0.626004 
 83 L B 0.987406 0.011768 0.000826 -> 0.987406 
 84 A B 0.978043 0.020285 0.001672 -> 0.978043 
 85 V B 0.894883 0.100925 0.004191 -> 0.894883 
 86 A B 0.986312 0.012885 0.000803 -> 0.986312 
 87 L B 0.986183 0.013374 0.000444 -> 0.986183 
 88 S B 0.948871 0.049683 0.001446 -> 0.948871 
 89 G B 0.902641 0.092270 0.005089 -> 0.902641 
 90 L B 0.986393 0.013162 0.000445 -> 0.986393 
 91 L B 0.977669 0.021779 0.000552 -> 0.977669 
 92 G B 0.968197 0.030842 0.000961 -> 0.968197 
 93 I B 0.970980 0.028101 0.000919 -> 0.970980 
 94 G B 0.981348 0.017542 0.001111 -> 0.981348 
 95 V B 0.988575 0.010521 0.000904 -> 0.988575 
 96 S B 0.967060 0.031697 0.001242 -> 0.967060 
 97 M B 0.849934 0.147146 0.002920 -> 0.849934 
 98 M B 0.763360 0.214347 0.022293 -> 0.763360 
 99 A B 0.979124 0.018644 0.002232 -> 0.979124 
 100 A B 0.971737 0.027149 0.001114 -> 0.971737 
 101 R M 0.209536 0.667831 0.122633 -> 0.667831 
 102 R M 0.106246 0.668333 0.225421 -> 0.668333 
 103 W B 0.523131 0.440529 0.036340 -> 0.523131 
 104 F B 0.543246 0.396497 0.060257 -> 0.543246 
 105 G M 0.177089 0.471886 0.351025 -> 0.471886 
 106 A M 0.181734 0.440171 0.378095 -> 0.440171 
 107 R M 0.199456 0.690511 0.110032 -> 0.690511 
 108 A B 0.889716 0.105627 0.004657 -> 0.889716 
 109 A B 0.960617 0.036008 0.003374 -> 0.960617 
 110 A B 0.957576 0.039239 0.003185 -> 0.957576 
 111 F B 0.981994 0.017370 0.000636 -> 0.981994 
 112 T B 0.975603 0.023856 0.000541 -> 0.975603 
 113 G B 0.994330 0.005401 0.000268 -> 0.994330 
 114 L B 0.992871 0.006869 0.000260 -> 0.992871 
 115 A B 0.984470 0.015093 0.000438 -> 0.984470 
 116 L B 0.968466 0.030408 0.001126 -> 0.968466 
 117 L B 0.975792 0.023003 0.001204 -> 0.975792 
 118 A B 0.982123 0.016673 0.001205 -> 0.982123 
 119 A B 0.971651 0.026752 0.001598 -> 0.971651 
 120 P B 0.927701 0.065550 0.006749 -> 0.927701 
 121 M B 0.924630 0.072305 0.003065 -> 0.924630 
 122 W B 0.917668 0.079012 0.003319 -> 0.917668 
 123 S B 0.927697 0.065037 0.007266 -> 0.927697 
 124 V B 0.821612 0.159219 0.019169 -> 0.821612 
 125 A B 0.941395 0.052521 0.006084 -> 0.941395 
 126 A B 0.940334 0.054407 0.005258 -> 0.940334 
 127 H B 0.628884 0.349699 0.021417 -> 0.628884 
 128 F B 0.754212 0.231505 0.014283 -> 0.754212 
 129 N B 0.943482 0.043484 0.013035 -> 0.943482 
 130 T B 0.726109 0.263575 0.010316 -> 0.726109 
 131 L B 0.908617 0.081756 0.009627 -> 0.908617 
 132 D B 0.812380 0.173618 0.014002 -> 0.812380 
 133 M B 0.987265 0.010558 0.002178 -> 0.987265 
 134 T B 0.985011 0.012861 0.002128 -> 0.985011 
 135 L B 0.982990 0.015281 0.001730 -> 0.982990 
 136 A B 0.978043 0.019732 0.002225 -> 0.978043 
 137 G B 0.984234 0.015201 0.000565 -> 0.984234 
 138 V B 0.989990 0.009715 0.000295 -> 0.989990 
 139 M B 0.990499 0.009013 0.000488 -> 0.990499 
 140 S B 0.989998 0.009607 0.000395 -> 0.989998 
 141 C B 0.995352 0.004418 0.000230 -> 0.995352 
 142 V B 0.996436 0.003309 0.000256 -> 0.996436 
 143 L B 0.993650 0.006124 0.000226 -> 0.993650 
 144 A B 0.995805 0.003909 0.000285 -> 0.995805 
 145 F B 0.993718 0.005869 0.000414 -> 0.993718 
 146 M B 0.974587 0.024203 0.001210 -> 0.974587 
 147 L B 0.979755 0.018396 0.001849 -> 0.979755 
 148 M B 0.648824 0.338422 0.012754 -> 0.648824 
 149 G B 0.815608 0.163712 0.020680 -> 0.815608 
 150 Q B 0.451075 0.442849 0.106076 -> 0.451075 
 151 H M 0.232620 0.628942 0.138438 -> 0.628942 
 152 P E 0.050575 0.281640 0.667785 -> 0.667785 
 153 D E 0.022945 0.145445 0.831610 -> 0.831610 
 154 A E 0.194852 0.399152 0.405996 -> 0.405996 
 155 S E 0.156888 0.388452 0.454660 -> 0.454660 
 156 V E 0.138449 0.363700 0.497851 -> 0.497851 
 157 A M 0.289467 0.365801 0.344732 -> 0.365801 
 158 A B 0.386741 0.383412 0.229847 -> 0.386741 
 159 R M 0.309551 0.487160 0.203288 -> 0.487160 
 160 R M 0.424911 0.502886 0.072203 -> 0.502886 
 161 G B 0.839206 0.141639 0.019155 -> 0.839206 
 162 W B 0.835505 0.152261 0.012234 -> 0.835505 
 163 M B 0.973375 0.024822 0.001804 -> 0.973375 
 164 V B 0.968605 0.030513 0.000882 -> 0.968605 
 165 A B 0.988854 0.010723 0.000423 -> 0.988854 
 166 C B 0.992139 0.007494 0.000367 -> 0.992139 
 167 W B 0.942505 0.056617 0.000878 -> 0.942505 
 168 A B 0.973446 0.025885 0.000670 -> 0.973446 
 169 A B 0.984698 0.015047 0.000255 -> 0.984698 
 170 M B 0.987265 0.012439 0.000296 -> 0.987265 
 171 G B 0.973604 0.025195 0.001202 -> 0.973604 
 172 V B 0.967586 0.031263 0.001151 -> 0.967586 
 173 A B 0.963994 0.033444 0.002562 -> 0.963994 
 174 I B 0.963952 0.032733 0.003315 -> 0.963952 
 175 L B 0.822221 0.165937 0.011842 -> 0.822221 
 176 T B 0.948235 0.044506 0.007259 -> 0.948235 
 177 K B 0.716617 0.262871 0.020512 -> 0.716617 
 178 G B 0.845834 0.139780 0.014386 -> 0.845834 
 179 L B 0.804126 0.184690 0.011184 -> 0.804126 
 180 V B 0.965030 0.031586 0.003384 -> 0.965030 
 181 G B 0.974288 0.024318 0.001394 -> 0.974288 
 182 I B 0.933514 0.064941 0.001545 -> 0.933514 
 183 A B 0.981621 0.017191 0.001188 -> 0.981621 
 184 L B 0.976662 0.022512 0.000826 -> 0.976662 
 185 P B 0.969069 0.029708 0.001223 -> 0.969069 
 186 G B 0.974671 0.024460 0.000869 -> 0.974671 
 187 L B 0.976248 0.022668 0.001084 -> 0.976248 
 188 V B 0.985121 0.013984 0.000896 -> 0.985121 
 189 L B 0.984341 0.014858 0.000801 -> 0.984341 
 190 V B 0.992305 0.006822 0.000873 -> 0.992305 
 191 V B 0.987778 0.008708 0.003514 -> 0.987778 
 192 Y B 0.781641 0.204910 0.013450 -> 0.781641 
 193 T B 0.892949 0.096835 0.010216 -> 0.892949 
 194 L B 0.672222 0.305807 0.021971 -> 0.672222 
 195 V B 0.566775 0.393937 0.039289 -> 0.566775 
 196 T M 0.324589 0.468403 0.207008 -> 0.468403 
 197 R M 0.162375 0.488924 0.348700 -> 0.488924 
 198 D E 0.095232 0.332775 0.571993 -> 0.571993 
 199 W M 0.346628 0.494149 0.159223 -> 0.494149 
 200 G E 0.190132 0.320388 0.489480 -> 0.489480 
 201 L M 0.394814 0.428261 0.176925 -> 0.428261 
 202 W B 0.577125 0.349300 0.073574 -> 0.577125 
 203 R M 0.191000 0.472788 0.336211 -> 0.472788 
 204 R M 0.261175 0.529688 0.209137 -> 0.529688 
 205 L B 0.824531 0.152550 0.022919 -> 0.824531 
 206 H B 0.681315 0.292692 0.025993 -> 0.681315 
 207 L B 0.828264 0.151940 0.019796 -> 0.828264 
 208 A B 0.933356 0.061098 0.005546 -> 0.933356 
 209 L B 0.947975 0.048507 0.003518 -> 0.947975 
 210 G B 0.942315 0.054529 0.003156 -> 0.942315 
 211 V B 0.975062 0.023942 0.000995 -> 0.975062 
 212 V B 0.985854 0.013329 0.000817 -> 0.985854 
 213 V B 0.983946 0.015103 0.000951 -> 0.983946 
 214 M B 0.951192 0.046670 0.002138 -> 0.951192 
 215 L B 0.976117 0.022289 0.001594 -> 0.976117 
 216 V B 0.960073 0.037601 0.002327 -> 0.960073 
 217 I B 0.947153 0.047728 0.005120 -> 0.947153 
 218 T B 0.961058 0.035293 0.003649 -> 0.961058 
 219 V B 0.969693 0.027859 0.002448 -> 0.969693 
 220 P B 0.952827 0.042819 0.004354 -> 0.952827 
 221 W B 0.920996 0.072975 0.006029 -> 0.920996 
 222 F B 0.945723 0.051518 0.002760 -> 0.945723 
 223 Y B 0.916477 0.078118 0.005404 -> 0.916477 
 224 L B 0.917625 0.072787 0.009588 -> 0.917625 
 225 V B 0.900081 0.083264 0.016655 -> 0.900081 
 226 S B 0.792830 0.187265 0.019905 -> 0.792830 
 227 V B 0.504341 0.443976 0.051683 -> 0.504341 
 228 R M 0.185264 0.550927 0.263809 -> 0.550927 
 229 N M 0.316306 0.535512 0.148182 -> 0.535512 
 230 P E 0.147114 0.357416 0.495470 -> 0.495470 
 231 E E 0.136651 0.376650 0.486699 -> 0.486699 
 232 F B 0.702503 0.246634 0.050862 -> 0.702503 
 233 P B 0.521151 0.275430 0.203419 -> 0.521151 
 234 N M 0.369094 0.391493 0.239414 -> 0.391493 
 235 F B 0.527197 0.344369 0.128434 -> 0.527197 
 236 F B 0.704449 0.212115 0.083436 -> 0.704449 
 237 F B 0.717282 0.213086 0.069632 -> 0.717282 
 238 I B 0.770401 0.170203 0.059395 -> 0.770401 
 239 H B 0.632508 0.295887 0.071604 -> 0.632508 
 240 E B 0.539074 0.336453 0.124473 -> 0.539074 
 241 H B 0.726874 0.224261 0.048865 -> 0.726874 
 242 W B 0.685344 0.261588 0.053068 -> 0.685344 
 243 G B 0.687727 0.242352 0.069921 -> 0.687727 
 244 S B 0.729382 0.229376 0.041242 -> 0.729382 
 245 V B 0.928281 0.063314 0.008405 -> 0.928281 
 246 F B 0.873648 0.116887 0.009465 -> 0.873648 
 247 Y B 0.851768 0.139803 0.008428 -> 0.851768 
 248 F B 0.946271 0.048759 0.004970 -> 0.946271 
 249 L B 0.931668 0.064658 0.003674 -> 0.931668 
 250 P B 0.842377 0.151251 0.006372 -> 0.842377 
 251 L B 0.893011 0.103321 0.003668 -> 0.893011 
 252 V B 0.951877 0.043766 0.004357 -> 0.951877 
 253 I B 0.913739 0.078638 0.007623 -> 0.913739 
 254 G B 0.791093 0.197399 0.011508 -> 0.791093 
 255 G B 0.789306 0.203079 0.007615 -> 0.789306 
 256 F B 0.862699 0.129714 0.007587 -> 0.862699 
 257 L B 0.969820 0.026090 0.004091 -> 0.969820 
 258 P B 0.910859 0.081272 0.007869 -> 0.910859 
 259 W B 0.886038 0.104480 0.009482 -> 0.886038 
 260 A B 0.901570 0.089065 0.009365 -> 0.901570 
 261 G B 0.868257 0.115397 0.016346 -> 0.868257 
 262 I B 0.927602 0.064297 0.008101 -> 0.927602 
 263 F B 0.954512 0.039379 0.006109 -> 0.954512 
 264 P B 0.808239 0.158932 0.032829 -> 0.808239 
 265 K B 0.473561 0.392066 0.134373 -> 0.473561 
 266 L B 0.942638 0.045066 0.012296 -> 0.942638 
 267 W B 0.815738 0.174243 0.010019 -> 0.815738 
 268 T B 0.503105 0.424044 0.072850 -> 0.503105 
 269 A B 0.472197 0.386154 0.141648 -> 0.472197 
 270 M B 0.483921 0.416927 0.099152 -> 0.483921 
 271 R M 0.186680 0.461021 0.352299 -> 0.461021 
 272 A M 0.288369 0.471151 0.240479 -> 0.471151 
 273 P E 0.054565 0.188275 0.757160 -> 0.757160 
 274 R E 0.100371 0.415408 0.484222 -> 0.484222 
 275 F B 0.558655 0.377635 0.063710 -> 0.558655 
 276 R M 0.136821 0.615748 0.247432 -> 0.615748 
 277 P B 0.425147 0.413425 0.161428 -> 0.425147 
 278 A B 0.744228 0.226778 0.028993 -> 0.744228 
 279 L B 0.886250 0.104383 0.009367 -> 0.886250 
 280 M B 0.966435 0.030826 0.002739 -> 0.966435 
 281 A B 0.962416 0.035867 0.001717 -> 0.962416 
 282 G B 0.970309 0.028533 0.001158 -> 0.970309 
 283 I B 0.978474 0.020504 0.001022 -> 0.978474 
 284 W B 0.874490 0.120990 0.004519 -> 0.874490 
 285 A B 0.964796 0.033128 0.002076 -> 0.964796 
 286 I B 0.972931 0.025679 0.001390 -> 0.972931 
 287 A B 0.989810 0.009191 0.001000 -> 0.989810 
 288 I B 0.977938 0.018828 0.003233 -> 0.977938 
 289 F B 0.967215 0.030135 0.002650 -> 0.967215 
 290 V B 0.980276 0.018630 0.001094 -> 0.980276 
 291 F B 0.932075 0.062527 0.005398 -> 0.932075 
 292 F B 0.818790 0.161258 0.019952 -> 0.818790 
 293 S B 0.746035 0.236411 0.017554 -> 0.746035 
 294 I B 0.681713 0.300365 0.017922 -> 0.681713 
 295 S B 0.572014 0.368390 0.059596 -> 0.572014 
 296 R M 0.113842 0.487989 0.398169 -> 0.487989 
 297 S E 0.128544 0.412697 0.458758 -> 0.458758 
 298 K M 0.148756 0.499349 0.351895 -> 0.499349 
 299 L M 0.404830 0.514635 0.080536 -> 0.514635 
 300 P B 0.577221 0.298163 0.124616 -> 0.577221 
 301 G B 0.690326 0.248923 0.060751 -> 0.690326 
 302 Y B 0.761316 0.223276 0.015408 -> 0.761316 
 303 I B 0.970021 0.026411 0.003568 -> 0.970021 
 304 V B 0.968283 0.029213 0.002505 -> 0.968283 
 305 P B 0.986513 0.010893 0.002594 -> 0.986513 
 306 V B 0.996935 0.002589 0.000475 -> 0.996935 
 307 I B 0.970343 0.028897 0.000760 -> 0.970343 
 308 P B 0.970861 0.027498 0.001640 -> 0.970861 
 309 A B 0.994335 0.005449 0.000215 -> 0.994335 
 310 L B 0.992512 0.007192 0.000297 -> 0.992512 
 311 G B 0.983974 0.015544 0.000482 -> 0.983974 
 312 I B 0.985109 0.014464 0.000427 -> 0.985109 
 313 L B 0.992599 0.006732 0.000669 -> 0.992599 
 314 A B 0.993313 0.006391 0.000296 -> 0.993313 
 315 G B 0.934367 0.063519 0.002114 -> 0.934367 
 316 V B 0.887700 0.103307 0.008993 -> 0.887700 
 317 A B 0.945466 0.049374 0.005161 -> 0.945466 
 318 L B 0.815343 0.177632 0.007024 -> 0.815343 
 319 D M 0.219915 0.579172 0.200914 -> 0.579172 
 320 R M 0.109331 0.608792 0.281877 -> 0.608792 
 321 L B 0.738212 0.244491 0.017298 -> 0.738212 
 322 S M 0.203989 0.566670 0.229341 -> 0.566670 
 323 P E 0.044505 0.189162 0.766333 -> 0.766333 
 324 R E 0.022804 0.261339 0.715856 -> 0.715856 
 325 S E 0.139251 0.350593 0.510155 -> 0.510155 
 326 W M 0.388062 0.463745 0.148193 -> 0.463745 
 327 G M 0.393278 0.402162 0.204560 -> 0.402162 
 328 K M 0.176854 0.532079 0.291067 -> 0.532079 
 329 Q B 0.448526 0.414288 0.137187 -> 0.448526 
 330 L B 0.777485 0.198892 0.023623 -> 0.777485 
 331 I B 0.882402 0.100940 0.016658 -> 0.882402 
 332 G B 0.929073 0.063880 0.007047 -> 0.929073 
 333 M B 0.921903 0.075264 0.002833 -> 0.921903 
 334 A B 0.969887 0.029266 0.000848 -> 0.969887 
 335 I B 0.977136 0.021937 0.000927 -> 0.977136 
 336 V B 0.971438 0.028061 0.000502 -> 0.971438 
 337 A B 0.977035 0.022330 0.000635 -> 0.977035 
 338 A B 0.984008 0.015647 0.000345 -> 0.984008 
 339 C B 0.977835 0.021512 0.000653 -> 0.977835 
 340 G B 0.952477 0.046507 0.001017 -> 0.952477 
 341 L B 0.945713 0.053524 0.000763 -> 0.945713 
 342 L B 0.966661 0.032181 0.001158 -> 0.966661 
 343 A B 0.965796 0.033446 0.000758 -> 0.965796 
 344 S B 0.924784 0.072450 0.002766 -> 0.924784 
 345 P B 0.871766 0.122056 0.006179 -> 0.871766 
 346 V B 0.914687 0.079762 0.005551 -> 0.914687 
 347 V B 0.935757 0.059809 0.004435 -> 0.935757 
 348 A B 0.837522 0.141667 0.020810 -> 0.837522 
 349 T B 0.683679 0.270301 0.046019 -> 0.683679 
 350 L B 0.623006 0.331385 0.045609 -> 0.623006 
 351 N M 0.363059 0.480110 0.156831 -> 0.480110 
 352 H M 0.251914 0.449589 0.298497 -> 0.449589 
 353 I B 0.614817 0.325964 0.059220 -> 0.614817 
 354 P B 0.433857 0.354946 0.211197 -> 0.433857 
 355 N B 0.529111 0.315128 0.155761 -> 0.529111 
 356 S B 0.638555 0.263130 0.098315 -> 0.638555 
 357 F B 0.771021 0.177095 0.051883 -> 0.771021 
 358 Y B 0.706452 0.243336 0.050212 -> 0.706452 
 359 R M 0.372091 0.500906 0.127002 -> 0.500906 
 360 A B 0.809184 0.162137 0.028680 -> 0.809184 
 361 Y B 0.876058 0.111943 0.012000 -> 0.876058 
 362 A B 0.941074 0.049596 0.009331 -> 0.941074 
 363 V B 0.905658 0.085735 0.008607 -> 0.905658 
 364 W B 0.912966 0.081881 0.005153 -> 0.912966 
 365 V B 0.957624 0.039327 0.003048 -> 0.957624 
 366 A B 0.955050 0.041522 0.003429 -> 0.955050 
 367 V B 0.983130 0.015817 0.001053 -> 0.983130 
 368 A B 0.977986 0.021439 0.000575 -> 0.977986 
 369 F B 0.967908 0.030777 0.001314 -> 0.967908 
 370 V B 0.986823 0.012595 0.000582 -> 0.986823 
 371 V B 0.969401 0.029665 0.000935 -> 0.969401 
 372 M B 0.966002 0.032917 0.001082 -> 0.966002 
 373 L B 0.984624 0.014335 0.001041 -> 0.984624 
 374 L B 0.970265 0.027877 0.001858 -> 0.970265 
 375 G B 0.967746 0.031489 0.000765 -> 0.967746 
 376 I B 0.960562 0.037884 0.001553 -> 0.960562 
 377 A B 0.978971 0.018062 0.002967 -> 0.978971 
 378 V B 0.975963 0.021187 0.002850 -> 0.975963 
 379 A B 0.965700 0.030770 0.003529 -> 0.965700 
 380 R B 0.494546 0.462943 0.042511 -> 0.494546 
 381 L B 0.631195 0.339752 0.029053 -> 0.631195 
 382 L B 0.636469 0.334372 0.029159 -> 0.636469 
 383 L M 0.290627 0.524264 0.185109 -> 0.524264 
 384 R E 0.072858 0.327930 0.599212 -> 0.599212 
 385 R E 0.071533 0.354296 0.574171 -> 0.574171 
 386 G M 0.210335 0.412066 0.377599 -> 0.412066 
 387 V M 0.403061 0.442904 0.154036 -> 0.442904 
 388 L B 0.501817 0.386568 0.111614 -> 0.501817 
 389 P B 0.444740 0.419922 0.135338 -> 0.444740 
 390 S B 0.833215 0.147624 0.019161 -> 0.833215 
 391 V B 0.940489 0.053043 0.006468 -> 0.940489 
 392 A B 0.918474 0.075635 0.005892 -> 0.918474 
 393 V B 0.960374 0.038536 0.001089 -> 0.960374 
 394 Y B 0.925039 0.073607 0.001355 -> 0.925039 
 395 A B 0.986796 0.012820 0.000384 -> 0.986796 
 396 M B 0.984108 0.015239 0.000653 -> 0.984108 
 397 G B 0.983778 0.015592 0.000631 -> 0.983778 
 398 M B 0.959537 0.039494 0.000969 -> 0.959537 
 399 Y B 0.911395 0.086682 0.001924 -> 0.911395 
 400 L B 0.984798 0.014158 0.001044 -> 0.984798 
 401 G B 0.961852 0.037228 0.000919 -> 0.961852 
 402 F B 0.934300 0.063767 0.001933 -> 0.934300 
 403 T B 0.945238 0.050551 0.004211 -> 0.945238 
 404 V B 0.949513 0.048047 0.002440 -> 0.949513 
 405 A B 0.898027 0.091873 0.010100 -> 0.898027 
 406 L B 0.799156 0.186001 0.014842 -> 0.799156 
 407 L B 0.660331 0.296527 0.043142 -> 0.660331 
 408 G B 0.677688 0.273392 0.048920 -> 0.677688 
 409 H M 0.408586 0.498224 0.093190 -> 0.498224 
 410 E E 0.123787 0.435347 0.440866 -> 0.440866 
 411 T E 0.202045 0.373545 0.424410 -> 0.424410 
 412 V B 0.608557 0.287253 0.104190 -> 0.608557 
 413 G B 0.365802 0.285830 0.348368 -> 0.365802 
 414 R M 0.105947 0.517520 0.376533 -> 0.517520 
 415 P B 0.368001 0.339242 0.292757 -> 0.368001 
 416 A E 0.071705 0.257656 0.670639 -> 0.670639 
 417 S E 0.002028 0.037743 0.960229 -> 0.960229 
