# Supplementary material for: AcconPred: Predicting Solvent Accessibility and Contact Number Simultaneously by a Multitask Learning Framework under the Conditional Neural Fields Model
Source: Biomed Res Int. 2015 Aug 3;2015:678764. doi: 10.1155/2015/678764 (PMC4538422; doi:10.1155/2015/678764)
Supplement: Supplementary file 1 — Training/testing dataset as well as the CASP11 evaluation dataset could be found in the Supplementary Material. The CASP11 evaluation dataset contains all detailed results from SPINE-X, SANN, ACCpro5 and AcconPred. [file 678764.f1.zip › Supplmentary_Files/105_casp11_domain/casp11_domain_AcconPred/T0830-D2.reso]

# AcconPred: three-state solvent accessibility prediction results 
# probabilities are in the order of B (Bury, pACC: 0-10), M (Medium, pACC: 11-40) and E (Exposed, pACC: 41-100), 
# where pACC is the relative solvent accessibility value calculated by DSSP 
# output format: <position> <one letter amino acid> <predicted label> ... <probabilities> ... -> <maximal probability> 

 1 G E 0.002403 0.016887 0.980709 -> 0.980709 
 2 A E 0.062165 0.385371 0.552464 -> 0.552464 
 3 D E 0.010910 0.175985 0.813105 -> 0.813105 
 4 I E 0.135353 0.374785 0.489862 -> 0.489862 
 5 A B 0.581283 0.344441 0.074276 -> 0.581283 
 6 P E 0.009277 0.174272 0.816451 -> 0.816451 
 7 Q E 0.052698 0.406875 0.540427 -> 0.540427 
 8 I B 0.809311 0.163032 0.027657 -> 0.809311 
 9 A M 0.163312 0.533634 0.303054 -> 0.533634 
 10 Q E 0.011637 0.133482 0.854882 -> 0.854882 
 11 K E 0.006209 0.207725 0.786066 -> 0.786066 
 12 L B 0.536102 0.442570 0.021328 -> 0.536102 
 13 T M 0.045463 0.487957 0.466580 -> 0.487957 
 14 P E 0.016094 0.098074 0.885832 -> 0.885832 
 15 E E 0.002254 0.105200 0.892546 -> 0.892546 
 16 M B 0.702000 0.282248 0.015752 -> 0.702000 
 17 P M 0.165281 0.610340 0.224379 -> 0.610340 
 18 L B 0.844250 0.149696 0.006054 -> 0.844250 
 19 Y B 0.586064 0.380161 0.033776 -> 0.586064 
 20 G B 0.835571 0.140739 0.023690 -> 0.835571 
 21 V B 0.835811 0.153396 0.010793 -> 0.835811 
 22 Q M 0.279208 0.562302 0.158491 -> 0.562302 
 23 M B 0.448690 0.441120 0.110190 -> 0.448690 
 24 L B 0.803998 0.172468 0.023534 -> 0.803998 
 25 D M 0.346573 0.467541 0.185886 -> 0.467541 
 26 H M 0.363123 0.434858 0.202019 -> 0.434858 
 27 T E 0.298991 0.297311 0.403698 -> 0.403698 
 28 L B 0.832846 0.142597 0.024557 -> 0.832846 
 29 P B 0.473022 0.381516 0.145462 -> 0.473022 
 30 F B 0.663207 0.256994 0.079799 -> 0.663207 
 31 Y B 0.462800 0.453075 0.084125 -> 0.462800 
 32 L B 0.693892 0.277109 0.028999 -> 0.693892 
 33 R E 0.019047 0.253535 0.727419 -> 0.727419 
 34 H M 0.332245 0.546863 0.120892 -> 0.546863 
 35 P M 0.277554 0.473214 0.249232 -> 0.473214 
 36 L B 0.735888 0.243834 0.020278 -> 0.735888 
 37 M B 0.525798 0.401859 0.072344 -> 0.525798 
 38 M B 0.783430 0.179638 0.036933 -> 0.783430 
 39 V B 0.795963 0.179744 0.024292 -> 0.795963 
 40 G B 0.508124 0.351262 0.140614 -> 0.508124 
 41 Q M 0.165797 0.569293 0.264910 -> 0.569293 
 42 A M 0.178639 0.452192 0.369169 -> 0.452192 
 43 D E 0.168505 0.410487 0.421008 -> 0.421008 
 44 E B 0.439784 0.420400 0.139817 -> 0.439784 
 45 L B 0.851179 0.112495 0.036326 -> 0.851179 
 46 T M 0.165458 0.496279 0.338262 -> 0.496279 
 47 F M 0.417374 0.431086 0.151539 -> 0.431086 
 48 G E 0.175004 0.358929 0.466067 -> 0.466067 
 49 A M 0.322293 0.447661 0.230046 -> 0.447661 
 50 T E 0.019704 0.181412 0.798884 -> 0.798884 
 51 V M 0.150419 0.535558 0.314023 -> 0.535558 
 52 E E 0.046115 0.352323 0.601562 -> 0.601562 
 53 P E 0.029429 0.220837 0.749734 -> 0.749734 
 54 Q E 0.029565 0.273658 0.696778 -> 0.696778 
 55 R E 0.022540 0.272771 0.704689 -> 0.704689 
 56 V M 0.382387 0.486139 0.131474 -> 0.486139 
 57 V B 0.635473 0.300753 0.063775 -> 0.635473 
 58 P B 0.544756 0.368973 0.086271 -> 0.544756 
 59 D E 0.046515 0.457467 0.496018 -> 0.496018 
 60 V M 0.398160 0.512589 0.089251 -> 0.512589 
 61 D E 0.013349 0.189167 0.797484 -> 0.797484 
 62 S M 0.112960 0.583571 0.303469 -> 0.583571 
 63 F B 0.974835 0.020091 0.005074 -> 0.974835 
 64 T M 0.410169 0.526635 0.063195 -> 0.526635 
 65 K E 0.003140 0.097134 0.899726 -> 0.899726 
 66 L M 0.315497 0.625073 0.059431 -> 0.625073 
 67 W B 0.836744 0.154368 0.008887 -> 0.836744 
 68 K E 0.005851 0.112061 0.882088 -> 0.882088 
 69 N E 0.002635 0.043721 0.953644 -> 0.953644 
 70 G E 0.019427 0.214958 0.765615 -> 0.765615 
 71 Q E 0.017480 0.305727 0.676793 -> 0.676793 
 72 P M 0.124595 0.664400 0.211005 -> 0.664400 
 73 A B 0.871535 0.122593 0.005872 -> 0.871535 
 74 M B 0.780149 0.210514 0.009336 -> 0.780149 
 75 A B 0.934785 0.058181 0.007034 -> 0.934785 
 76 V B 0.899096 0.091097 0.009807 -> 0.899096 
 77 M B 0.909334 0.087981 0.002685 -> 0.909334 
 78 S M 0.275291 0.601629 0.123080 -> 0.601629 
 79 P M 0.128912 0.557548 0.313541 -> 0.557548 
 80 D E 0.002701 0.074138 0.923160 -> 0.923160 
 81 T M 0.223718 0.661466 0.114816 -> 0.661466 
 82 Y B 0.748001 0.241154 0.010845 -> 0.748001 
 83 L E 0.009061 0.165500 0.825439 -> 0.825439 
 84 A E 0.007398 0.093749 0.898853 -> 0.898853 
 85 L B 0.651060 0.309228 0.039712 -> 0.651060 
 86 A M 0.183321 0.550133 0.266546 -> 0.550133 
 87 P E 0.006321 0.047210 0.946469 -> 0.946469 
 88 T E 0.008345 0.096013 0.895642 -> 0.895642 
 89 L M 0.461017 0.498623 0.040360 -> 0.498623 
 90 S E 0.054381 0.278842 0.666777 -> 0.666777 
 91 M B 0.460078 0.442103 0.097820 -> 0.460078 
 92 Y M 0.108017 0.659491 0.232492 -> 0.659491 
 93 V M 0.330088 0.484493 0.185420 -> 0.484493 
 94 V B 0.684060 0.261923 0.054016 -> 0.684060 
 95 A B 0.749708 0.199250 0.051042 -> 0.749708 
 96 R M 0.170459 0.532136 0.297404 -> 0.532136 
 97 D M 0.175257 0.501477 0.323266 -> 0.501477 
 98 W M 0.164798 0.447426 0.387776 -> 0.447426 
 99 R M 0.071998 0.511087 0.416915 -> 0.511087 
 100 R M 0.244308 0.666087 0.089605 -> 0.666087 
 101 V B 0.927885 0.067658 0.004457 -> 0.927885 
 102 V B 0.921097 0.072256 0.006647 -> 0.921097 
 103 V B 0.933443 0.059906 0.006651 -> 0.933443 
 104 A B 0.642708 0.297570 0.059721 -> 0.642708 
 105 N M 0.190115 0.582617 0.227268 -> 0.582617 
 106 V M 0.382515 0.421837 0.195648 -> 0.421837 
 107 A M 0.326301 0.402148 0.271551 -> 0.402148 
 108 S E 0.062194 0.271700 0.666106 -> 0.666106 
 109 L M 0.206990 0.427334 0.365676 -> 0.427334 
 110 A E 0.030215 0.198823 0.770962 -> 0.770962 
 111 G E 0.001840 0.020547 0.977613 -> 0.977613 
