# Supplementary material for: AcconPred: Predicting Solvent Accessibility and Contact Number Simultaneously by a Multitask Learning Framework under the Conditional Neural Fields Model
Source: Biomed Res Int. 2015 Aug 3;2015:678764. doi: 10.1155/2015/678764 (PMC4538422; doi:10.1155/2015/678764)
Supplement: Supplementary file 1 — Training/testing dataset as well as the CASP11 evaluation dataset could be found in the Supplementary Material. The CASP11 evaluation dataset contains all detailed results from SPINE-X, SANN, ACCpro5 and AcconPred. [file 678764.f1.zip › Supplmentary_Files/105_casp11_domain/casp11_domain_AcconPred/T0831-D1.reso]

# AcconPred: three-state solvent accessibility prediction results 
# probabilities are in the order of B (Bury, pACC: 0-10), M (Medium, pACC: 11-40) and E (Exposed, pACC: 41-100), 
# where pACC is the relative solvent accessibility value calculated by DSSP 
# output format: <position> <one letter amino acid> <predicted label> ... <probabilities> ... -> <maximal probability> 

 1 T E 0.008784 0.063693 0.927523 -> 0.927523 
 2 M E 0.051378 0.268108 0.680514 -> 0.680514 
 3 E E 0.007423 0.157430 0.835147 -> 0.835147 
 4 E E 0.005163 0.151832 0.843005 -> 0.843005 
 5 L B 0.485198 0.359154 0.155648 -> 0.485198 
 6 L M 0.360705 0.570276 0.069019 -> 0.570276 
 7 T E 0.012500 0.245909 0.741591 -> 0.741591 
 8 S M 0.096891 0.653763 0.249346 -> 0.653763 
 9 L B 0.905753 0.088163 0.006084 -> 0.905753 
 10 Q M 0.185483 0.661269 0.153248 -> 0.661269 
 11 K E 0.001087 0.043320 0.955592 -> 0.955592 
 12 K E 0.026447 0.333118 0.640435 -> 0.640435 
 13 C B 0.783833 0.193177 0.022990 -> 0.783833 
 14 G M 0.145998 0.572741 0.281261 -> 0.572741 
 15 T E 0.029240 0.238277 0.732483 -> 0.732483 
 16 E M 0.086304 0.605699 0.307997 -> 0.605699 
 17 C B 0.844508 0.141341 0.014151 -> 0.844508 
 18 E M 0.066256 0.611223 0.322522 -> 0.611223 
 19 E E 0.012086 0.244672 0.743242 -> 0.743242 
 20 A B 0.648739 0.296808 0.054454 -> 0.648739 
 21 H B 0.678791 0.299302 0.021907 -> 0.678791 
 22 R M 0.158452 0.559114 0.282434 -> 0.559114 
 23 Q M 0.098353 0.560743 0.340904 -> 0.560743 
 24 L B 0.833976 0.155046 0.010978 -> 0.833976 
 25 V B 0.964416 0.029801 0.005784 -> 0.964416 
 26 C B 0.548929 0.330440 0.120632 -> 0.548929 
 27 A B 0.678438 0.236824 0.084737 -> 0.678438 
 28 L B 0.769613 0.219422 0.010965 -> 0.769613 
 29 N B 0.804067 0.181050 0.014883 -> 0.804067 
 30 G B 0.939486 0.051226 0.009287 -> 0.939486 
 31 L B 0.888433 0.103885 0.007683 -> 0.888433 
 32 A B 0.959730 0.032759 0.007511 -> 0.959730 
 33 G B 0.966879 0.029537 0.003583 -> 0.966879 
 34 I B 0.973207 0.024339 0.002454 -> 0.973207 
 35 H M 0.416429 0.539357 0.044214 -> 0.539357 
 36 I B 0.525130 0.447808 0.027062 -> 0.525130 
 37 I B 0.905410 0.082554 0.012035 -> 0.905410 
 38 K E 0.012730 0.325695 0.661575 -> 0.661575 
 39 G E 0.019088 0.067143 0.913769 -> 0.913769 
 40 E M 0.061165 0.690676 0.248159 -> 0.690676 
 41 Y M 0.423686 0.525689 0.050624 -> 0.525689 
 42 A E 0.028441 0.162963 0.808597 -> 0.808597 
 43 L M 0.067599 0.571317 0.361085 -> 0.571317 
 44 A B 0.946310 0.048215 0.005475 -> 0.946310 
 45 A B 0.755082 0.216943 0.027975 -> 0.755082 
 46 E E 0.018157 0.319744 0.662099 -> 0.662099 
 47 L B 0.546401 0.437859 0.015740 -> 0.546401 
 48 Y B 0.917535 0.078769 0.003696 -> 0.917535 
 49 R M 0.174955 0.716310 0.108735 -> 0.716310 
 50 E M 0.089696 0.520285 0.390019 -> 0.520285 
 51 V B 0.936399 0.055605 0.007996 -> 0.936399 
 52 L B 0.837916 0.140704 0.021380 -> 0.837916 
 53 R E 0.006347 0.330530 0.663123 -> 0.663123 
 54 S M 0.251681 0.637385 0.110934 -> 0.637385 
 55 S B 0.691264 0.281463 0.027273 -> 0.691264 
 56 E E 0.008085 0.256047 0.735868 -> 0.735868 
 57 E E 0.008344 0.091586 0.900070 -> 0.900070 
 58 H M 0.296242 0.512704 0.191054 -> 0.512704 
 59 K E 0.013016 0.297259 0.689725 -> 0.689725 
 60 G E 0.007559 0.112742 0.879699 -> 0.879699 
 61 K E 0.013984 0.199678 0.786338 -> 0.786338 
 62 L B 0.756602 0.223964 0.019434 -> 0.756602 
 63 K E 0.035465 0.428782 0.535753 -> 0.535753 
 64 T M 0.203502 0.409470 0.387028 -> 0.409470 
 65 D M 0.386732 0.522256 0.091012 -> 0.522256 
 66 S B 0.451035 0.434366 0.114599 -> 0.451035 
 67 L B 0.841368 0.124114 0.034518 -> 0.841368 
 68 Q B 0.621885 0.289507 0.088609 -> 0.621885 
 69 R M 0.439349 0.494257 0.066395 -> 0.494257 
 70 L B 0.942581 0.039859 0.017559 -> 0.942581 
 71 H B 0.679085 0.287874 0.033041 -> 0.679085 
 72 A B 0.941986 0.039565 0.018449 -> 0.941986 
 73 T B 0.916686 0.072065 0.011249 -> 0.916686 
 74 H B 0.507103 0.447100 0.045797 -> 0.507103 
 75 N B 0.802885 0.183533 0.013582 -> 0.802885 
 76 L B 0.965988 0.026295 0.007717 -> 0.965988 
 77 M B 0.600886 0.364818 0.034296 -> 0.600886 
 78 E M 0.165613 0.590452 0.243934 -> 0.590452 
 79 L B 0.886855 0.101953 0.011192 -> 0.886855 
 80 L B 0.631480 0.345749 0.022772 -> 0.631480 
 81 I E 0.029530 0.273907 0.696564 -> 0.696564 
 82 A E 0.055899 0.317515 0.626586 -> 0.626586 
 83 R E 0.008675 0.233549 0.757776 -> 0.757776 
 84 H M 0.095196 0.596055 0.308749 -> 0.596055 
 85 P E 0.009961 0.081529 0.908510 -> 0.908510 
 86 G E 0.021105 0.199586 0.779309 -> 0.779309 
 87 I M 0.432561 0.507371 0.060068 -> 0.507371 
 88 P E 0.042530 0.278771 0.678699 -> 0.678699 
 89 P E 0.076422 0.314667 0.608911 -> 0.608911 
 90 T E 0.105484 0.401476 0.493040 -> 0.493040 
 91 L B 0.513269 0.416732 0.069999 -> 0.513269 
 92 R E 0.018709 0.288239 0.693052 -> 0.693052 
 93 D E 0.025388 0.318620 0.655992 -> 0.655992 
 94 G E 0.022030 0.246544 0.731426 -> 0.731426 
 95 R E 0.006521 0.161916 0.831563 -> 0.831563 
 96 L B 0.469534 0.468457 0.062009 -> 0.469534 
 97 E E 0.012835 0.374912 0.612253 -> 0.612253 
 98 E E 0.009111 0.111052 0.879837 -> 0.879837 
 99 E M 0.131038 0.660493 0.208469 -> 0.660493 
 100 A B 0.735038 0.232897 0.032065 -> 0.735038 
 101 K E 0.003081 0.133648 0.863271 -> 0.863271 
 102 Q E 0.002945 0.149409 0.847646 -> 0.847646 
 103 L B 0.537880 0.423523 0.038597 -> 0.537880 
 104 R M 0.144745 0.652616 0.202638 -> 0.652616 
 105 E E 0.003466 0.166954 0.829580 -> 0.829580 
 106 H E 0.024403 0.364962 0.610636 -> 0.610636 
 107 Y B 0.626821 0.353004 0.020175 -> 0.626821 
 108 M B 0.465863 0.390780 0.143357 -> 0.465863 
 109 V E 0.062278 0.335887 0.601835 -> 0.601835 
 110 D E 0.012374 0.195657 0.791969 -> 0.791969 
 111 E E 0.112011 0.410204 0.477785 -> 0.477785 
 112 L M 0.260746 0.536135 0.203119 -> 0.536135 
 113 A E 0.053842 0.268400 0.677758 -> 0.677758 
 114 M M 0.146487 0.507364 0.346148 -> 0.507364 
 115 A B 0.685845 0.275642 0.038513 -> 0.685845 
 116 T M 0.097404 0.491191 0.411405 -> 0.491191 
 117 E E 0.019918 0.244795 0.735288 -> 0.735288 
 118 R M 0.116871 0.536670 0.346458 -> 0.536670 
 119 L M 0.399593 0.462834 0.137573 -> 0.462834 
 120 R E 0.008705 0.196329 0.794966 -> 0.794966 
 121 V E 0.175552 0.319153 0.505295 -> 0.505295 
 122 H M 0.168545 0.561261 0.270195 -> 0.561261 
 123 E E 0.043110 0.393922 0.562968 -> 0.562968 
 124 V E 0.187662 0.379801 0.432536 -> 0.432536 
 125 E M 0.156944 0.506162 0.336894 -> 0.506162 
 126 Q M 0.069837 0.493275 0.436889 -> 0.493275 
 127 N E 0.027262 0.267742 0.704996 -> 0.704996 
 128 R M 0.089852 0.556291 0.353857 -> 0.556291 
 129 I M 0.378493 0.509686 0.111821 -> 0.509686 
 130 K E 0.001274 0.093857 0.904869 -> 0.904869 
 131 L E 0.060423 0.400643 0.538934 -> 0.538934 
 132 L B 0.512754 0.422403 0.064842 -> 0.512754 
 133 N M 0.073456 0.500697 0.425847 -> 0.500697 
 134 D E 0.005740 0.095500 0.898761 -> 0.898761 
 135 K E 0.009819 0.167528 0.822653 -> 0.822653 
 136 A B 0.456235 0.339921 0.203844 -> 0.456235 
 137 V E 0.129445 0.353161 0.517394 -> 0.517394 
 138 A B 0.417534 0.314133 0.268333 -> 0.417534 
 139 T M 0.167854 0.532731 0.299416 -> 0.532731 
 140 S E 0.047497 0.296286 0.656217 -> 0.656217 
 141 Q E 0.006446 0.151673 0.841880 -> 0.841880 
 142 L B 0.687971 0.244826 0.067203 -> 0.687971 
 143 Q M 0.097601 0.605475 0.296924 -> 0.605475 
 144 K E 0.004849 0.079309 0.915842 -> 0.915842 
 145 K E 0.012992 0.290500 0.696507 -> 0.696507 
 146 L B 0.619519 0.322999 0.057481 -> 0.619519 
 147 G E 0.180628 0.390251 0.429121 -> 0.429121 
 148 Q E 0.038210 0.294873 0.666917 -> 0.666917 
 149 L M 0.277569 0.497243 0.225189 -> 0.497243 
 150 L B 0.701505 0.252709 0.045787 -> 0.701505 
 151 Y M 0.316684 0.442563 0.240753 -> 0.442563 
 152 L B 0.366627 0.299240 0.334133 -> 0.366627 
 153 T E 0.197746 0.398591 0.403663 -> 0.403663 
 154 N E 0.053906 0.267688 0.678407 -> 0.678407 
 155 L E 0.053429 0.375212 0.571359 -> 0.571359 
