# Supplementary material for: AcconPred: Predicting Solvent Accessibility and Contact Number Simultaneously by a Multitask Learning Framework under the Conditional Neural Fields Model
Source: Biomed Res Int. 2015 Aug 3;2015:678764. doi: 10.1155/2015/678764 (PMC4538422; doi:10.1155/2015/678764)
Supplement: Supplementary file 1 — Training/testing dataset as well as the CASP11 evaluation dataset could be found in the Supplementary Material. The CASP11 evaluation dataset contains all detailed results from SPINE-X, SANN, ACCpro5 and AcconPred. [file 678764.f1.zip › Supplmentary_Files/105_casp11_domain/casp11_domain_AcconPred/T0831-D2.reso]

# AcconPred: three-state solvent accessibility prediction results 
# probabilities are in the order of B (Bury, pACC: 0-10), M (Medium, pACC: 11-40) and E (Exposed, pACC: 41-100), 
# where pACC is the relative solvent accessibility value calculated by DSSP 
# output format: <position> <one letter amino acid> <predicted label> ... <probabilities> ... -> <maximal probability> 

 1 S E 0.014804 0.060231 0.924965 -> 0.924965 
 2 K E 0.024435 0.170116 0.805449 -> 0.805449 
 3 C E 0.148389 0.340203 0.511409 -> 0.511409 
 4 N M 0.087861 0.496681 0.415457 -> 0.496681 
 5 T E 0.015310 0.162165 0.822525 -> 0.822525 
 6 E E 0.019979 0.330776 0.649245 -> 0.649245 
 7 V B 0.639213 0.283415 0.077372 -> 0.639213 
 8 A M 0.074565 0.506241 0.419194 -> 0.506241 
 9 E E 0.004477 0.140008 0.855515 -> 0.855515 
 10 A B 0.715250 0.258694 0.026056 -> 0.715250 
 11 Q B 0.527761 0.428291 0.043948 -> 0.527761 
 12 Q E 0.003145 0.093371 0.903484 -> 0.903484 
 13 A E 0.066649 0.411674 0.521677 -> 0.521677 
 14 L B 0.878867 0.106626 0.014507 -> 0.878867 
 15 Y M 0.044979 0.613932 0.341089 -> 0.613932 
 16 P E 0.010373 0.129010 0.860617 -> 0.860617 
 17 V B 0.531441 0.434167 0.034391 -> 0.531441 
 18 Q M 0.244731 0.631965 0.123304 -> 0.631965 
 19 Q E 0.008441 0.141023 0.850536 -> 0.850536 
 20 T M 0.086155 0.632674 0.281172 -> 0.632674 
 21 I B 0.806912 0.179565 0.013523 -> 0.806912 
 22 H E 0.010997 0.395215 0.593788 -> 0.593788 
 23 E E 0.013591 0.295582 0.690827 -> 0.690827 
 24 L B 0.750553 0.240939 0.008508 -> 0.750553 
 25 Q M 0.047071 0.630342 0.322587 -> 0.630342 
 26 R E 0.002029 0.061040 0.936931 -> 0.936931 
 27 K E 0.003172 0.141392 0.855436 -> 0.855436 
 28 I M 0.284957 0.564316 0.150726 -> 0.564316 
 29 H E 0.037198 0.307440 0.655362 -> 0.655362 
 30 S E 0.033827 0.238709 0.727465 -> 0.727465 
 31 N E 0.017156 0.251812 0.731032 -> 0.731032 
 32 S M 0.455159 0.463953 0.080888 -> 0.463953 
 33 P E 0.064406 0.327841 0.607753 -> 0.607753 
 34 W B 0.519361 0.419364 0.061275 -> 0.519361 
 35 W B 0.909558 0.081417 0.009024 -> 0.909558 
 36 L B 0.556985 0.402362 0.040652 -> 0.556985 
 37 N M 0.188758 0.655098 0.156144 -> 0.655098 
 38 V B 0.956171 0.038637 0.005192 -> 0.956171 
 39 I B 0.913762 0.071547 0.014691 -> 0.913762 
 40 H M 0.102028 0.557998 0.339975 -> 0.557998 
 41 R M 0.175892 0.693897 0.130211 -> 0.693897 
 42 A B 0.845756 0.129645 0.024599 -> 0.845756 
 43 I M 0.209669 0.567425 0.222906 -> 0.567425 
 44 E E 0.045546 0.287244 0.667210 -> 0.667210 
 45 F M 0.203868 0.540307 0.255826 -> 0.540307 
 46 T E 0.042998 0.266430 0.690572 -> 0.690572 
 47 I M 0.318763 0.516063 0.165174 -> 0.516063 
 48 D M 0.114780 0.620601 0.264619 -> 0.620601 
 49 E E 0.003150 0.099261 0.897588 -> 0.897588 
 50 E E 0.012352 0.292283 0.695365 -> 0.695365 
 51 L B 0.869141 0.121532 0.009326 -> 0.869141 
 52 V M 0.343137 0.604859 0.052004 -> 0.604859 
 53 Q E 0.002883 0.104732 0.892384 -> 0.892384 
 54 R M 0.056183 0.636128 0.307689 -> 0.636128 
 55 V B 0.901804 0.087043 0.011153 -> 0.901804 
 56 R E 0.003463 0.231431 0.765106 -> 0.765106 
 57 N E 0.004659 0.117847 0.877494 -> 0.877494 
 58 E M 0.055036 0.664982 0.279982 -> 0.664982 
 59 I B 0.579162 0.394995 0.025844 -> 0.579162 
 60 T E 0.021703 0.290872 0.687425 -> 0.687425 
 61 K E 0.001510 0.069749 0.928741 -> 0.928741 
 62 F B 0.644035 0.331665 0.024300 -> 0.644035 
 63 R E 0.031472 0.343172 0.625356 -> 0.625356 
 64 D M 0.095448 0.550104 0.354449 -> 0.550104 
 65 C B 0.597736 0.347789 0.054475 -> 0.597736 
 66 R E 0.076569 0.425917 0.497514 -> 0.497514 
 67 G B 0.683372 0.215896 0.100732 -> 0.683372 
 68 L B 0.952109 0.028431 0.019460 -> 0.952109 
 69 Q M 0.210550 0.663534 0.125915 -> 0.663534 
 70 F M 0.292423 0.415669 0.291907 -> 0.415669 
 71 L B 0.757180 0.195090 0.047729 -> 0.757180 
 72 L B 0.963578 0.016031 0.020391 -> 0.963578 
 73 T M 0.273028 0.511278 0.215694 -> 0.511278 
 74 T M 0.246050 0.492917 0.261034 -> 0.492917 
 75 Q B 0.491228 0.473352 0.035420 -> 0.491228 
 76 M B 0.846331 0.127610 0.026059 -> 0.846331 
 77 E E 0.032393 0.388540 0.579068 -> 0.579068 
 78 E M 0.047225 0.550456 0.402319 -> 0.550456 
 79 L B 0.959722 0.029172 0.011106 -> 0.959722 
 80 N M 0.087316 0.714672 0.198012 -> 0.714672 
 81 K E 0.001765 0.047142 0.951093 -> 0.951093 
 82 C M 0.457967 0.511393 0.030640 -> 0.511393 
 83 Q B 0.651463 0.313151 0.035386 -> 0.651463 
 84 K E 0.002255 0.074523 0.923222 -> 0.923222 
 85 L E 0.023449 0.326239 0.650312 -> 0.650312 
 86 V B 0.949909 0.047017 0.003074 -> 0.949909 
 87 R M 0.146391 0.765181 0.088429 -> 0.765181 
 88 E E 0.003498 0.189474 0.807028 -> 0.807028 
 89 A B 0.507374 0.481585 0.011041 -> 0.507374 
 90 V B 0.972328 0.023056 0.004616 -> 0.972328 
 91 K E 0.002385 0.240377 0.757238 -> 0.757238 
 92 N E 0.007363 0.167859 0.824778 -> 0.824778 
 93 L B 0.643876 0.339651 0.016473 -> 0.643876 
 94 E E 0.005653 0.205023 0.789325 -> 0.789325 
 95 G E 0.015215 0.187524 0.797261 -> 0.797261 
 96 P E 0.038388 0.341980 0.619632 -> 0.619632 
 97 P E 0.084139 0.396799 0.519063 -> 0.519063 
 98 S E 0.046615 0.439135 0.514249 -> 0.514249 
 99 R E 0.004317 0.141275 0.854409 -> 0.854409 
 100 N E 0.018389 0.136253 0.845358 -> 0.845358 
 101 V M 0.326101 0.583256 0.090643 -> 0.583256 
 102 I B 0.665992 0.297390 0.036618 -> 0.665992 
 103 E E 0.028697 0.255256 0.716046 -> 0.716046 
 104 S M 0.088761 0.470925 0.440314 -> 0.470925 
 105 A B 0.726644 0.224992 0.048363 -> 0.726644 
 106 T M 0.259949 0.392689 0.347362 -> 0.392689 
 107 V E 0.075269 0.320066 0.604665 -> 0.604665 
 108 C B 0.465655 0.437802 0.096543 -> 0.465655 
 109 H M 0.243873 0.493924 0.262203 -> 0.493924 
 110 L E 0.146574 0.349804 0.503622 -> 0.503622 
 111 R E 0.076924 0.440394 0.482682 -> 0.482682 
 112 P E 0.063055 0.268801 0.668144 -> 0.668144 
 113 A E 0.034795 0.109519 0.855686 -> 0.855686 
 114 R E 0.015311 0.126984 0.857705 -> 0.857705 
 115 L M 0.175332 0.610652 0.214015 -> 0.610652 
 116 P E 0.012183 0.105793 0.882024 -> 0.882024 
 117 L E 0.072300 0.318172 0.609528 -> 0.609528 
 118 N M 0.187713 0.412341 0.399946 -> 0.412341 
 119 C M 0.310898 0.453753 0.235349 -> 0.453753 
 120 C B 0.741834 0.232874 0.025293 -> 0.741834 
 121 V M 0.102711 0.544487 0.352801 -> 0.544487 
 122 F M 0.389624 0.436312 0.174064 -> 0.436312 
 123 C B 0.611891 0.327961 0.060147 -> 0.611891 
 124 K E 0.016250 0.229532 0.754218 -> 0.754218 
 125 A B 0.710249 0.241271 0.048480 -> 0.710249 
 126 D M 0.074100 0.503559 0.422341 -> 0.503559 
 127 E E 0.047203 0.303376 0.649421 -> 0.649421 
 128 L M 0.214840 0.677943 0.107217 -> 0.677943 
 129 F B 0.831402 0.158269 0.010329 -> 0.831402 
 130 T M 0.080663 0.521646 0.397690 -> 0.521646 
 131 E E 0.026372 0.433207 0.540421 -> 0.540421 
 132 Y B 0.752629 0.181980 0.065391 -> 0.752629 
 133 E B 0.570335 0.372520 0.057145 -> 0.570335 
 134 S E 0.157183 0.313662 0.529155 -> 0.529155 
 135 K M 0.035726 0.508440 0.455834 -> 0.508440 
 136 L B 0.663135 0.259755 0.077110 -> 0.663135 
 137 F B 0.634410 0.295458 0.070131 -> 0.634410 
 138 S E 0.120294 0.421917 0.457789 -> 0.457789 
 139 N E 0.079647 0.415606 0.504747 -> 0.504747 
 140 I E 0.141027 0.397855 0.461117 -> 0.461117 
 141 S B 0.443733 0.416148 0.140119 -> 0.443733 
 142 E E 0.048010 0.344814 0.607176 -> 0.607176 
 143 T M 0.424029 0.485461 0.090510 -> 0.485461 
 144 E B 0.515476 0.347194 0.137330 -> 0.515476 
 145 R M 0.072804 0.503850 0.423346 -> 0.503850 
 146 S B 0.849692 0.119432 0.030876 -> 0.849692 
 147 M B 0.851374 0.134885 0.013741 -> 0.851374 
 148 K E 0.071782 0.448999 0.479219 -> 0.479219 
 149 A B 0.540793 0.402153 0.057055 -> 0.540793 
 150 I B 0.965216 0.027493 0.007291 -> 0.965216 
 151 L M 0.356334 0.600995 0.042671 -> 0.600995 
 152 S E 0.041943 0.271983 0.686074 -> 0.686074 
 153 F M 0.470722 0.498756 0.030522 -> 0.498756 
 154 A B 0.842353 0.137385 0.020261 -> 0.842353 
 155 K E 0.018519 0.222858 0.758623 -> 0.758623 
 156 S E 0.053323 0.268240 0.678437 -> 0.678437 
 157 H E 0.062964 0.466656 0.470380 -> 0.470380 
 158 R E 0.022674 0.202529 0.774797 -> 0.774797 
 159 F M 0.260866 0.548386 0.190748 -> 0.548386 
 160 D E 0.047652 0.339210 0.613138 -> 0.613138 
 161 V E 0.029539 0.200808 0.769653 -> 0.769653 
 162 E E 0.014137 0.207285 0.778578 -> 0.778578 
 163 F B 0.522701 0.436702 0.040597 -> 0.522701 
 164 V M 0.172751 0.627224 0.200025 -> 0.627224 
 165 D E 0.008209 0.096925 0.894866 -> 0.894866 
 166 E E 0.030530 0.311157 0.658313 -> 0.658313 
 167 G B 0.704065 0.220660 0.075275 -> 0.704065 
 168 S E 0.051802 0.331446 0.616752 -> 0.616752 
 169 T E 0.024268 0.262590 0.713142 -> 0.713142 
 170 S B 0.622115 0.337296 0.040590 -> 0.622115 
 171 M B 0.569778 0.351674 0.078548 -> 0.569778 
 172 D M 0.042007 0.494406 0.463587 -> 0.494406 
 173 L B 0.641103 0.302708 0.056189 -> 0.641103 
 174 F B 0.811853 0.153336 0.034811 -> 0.811853 
 175 E M 0.060520 0.551378 0.388102 -> 0.551378 
 176 A B 0.497661 0.359050 0.143289 -> 0.497661 
 177 W B 0.795936 0.172705 0.031360 -> 0.795936 
 178 K M 0.091629 0.715765 0.192606 -> 0.715765 
 179 K E 0.004058 0.187836 0.808106 -> 0.808106 
 180 E B 0.613403 0.350514 0.036083 -> 0.613403 
 181 Y B 0.832748 0.149387 0.017865 -> 0.832748 
 182 K E 0.026856 0.383969 0.589175 -> 0.589175 
 183 L M 0.247887 0.604374 0.147739 -> 0.604374 
 184 L B 0.913399 0.073842 0.012759 -> 0.913399 
 185 H B 0.548415 0.409701 0.041883 -> 0.548415 
 186 E M 0.106409 0.532238 0.361352 -> 0.532238 
 187 Y B 0.751180 0.229085 0.019736 -> 0.751180 
 188 W B 0.849756 0.137191 0.013053 -> 0.849756 
 189 M B 0.448797 0.324085 0.227118 -> 0.448797 
 190 A M 0.371547 0.435975 0.192478 -> 0.435975 
 191 L B 0.885734 0.071236 0.043030 -> 0.885734 
 192 R M 0.041405 0.643875 0.314720 -> 0.643875 
 193 N E 0.037265 0.233310 0.729425 -> 0.729425 
 194 R M 0.057839 0.493393 0.448768 -> 0.493393 
 195 V B 0.590974 0.299794 0.109232 -> 0.590974 
 196 S E 0.037694 0.175671 0.786635 -> 0.786635 
 197 A E 0.000519 0.025673 0.973808 -> 0.973808 
