# Supplementary material for: AcconPred: Predicting Solvent Accessibility and Contact Number Simultaneously by a Multitask Learning Framework under the Conditional Neural Fields Model
Source: Biomed Res Int. 2015 Aug 3;2015:678764. doi: 10.1155/2015/678764 (PMC4538422; doi:10.1155/2015/678764)
Supplement: Supplementary file 1 — Training/testing dataset as well as the CASP11 evaluation dataset could be found in the Supplementary Material. The CASP11 evaluation dataset contains all detailed results from SPINE-X, SANN, ACCpro5 and AcconPred. [file 678764.f1.zip › Supplmentary_Files/105_casp11_domain/casp11_domain_AcconPred/T0832-D1.reso]

# AcconPred: three-state solvent accessibility prediction results 
# probabilities are in the order of B (Bury, pACC: 0-10), M (Medium, pACC: 11-40) and E (Exposed, pACC: 41-100), 
# where pACC is the relative solvent accessibility value calculated by DSSP 
# output format: <position> <one letter amino acid> <predicted label> ... <probabilities> ... -> <maximal probability> 

 1 P E 0.006600 0.040369 0.953031 -> 0.953031 
 2 I E 0.071752 0.443936 0.484311 -> 0.484311 
 3 K E 0.017224 0.183651 0.799125 -> 0.799125 
 4 R E 0.009768 0.144065 0.846166 -> 0.846166 
 5 A E 0.078012 0.286577 0.635411 -> 0.635411 
 6 L M 0.333970 0.483687 0.182344 -> 0.483687 
 7 Q E 0.012879 0.236969 0.750152 -> 0.750152 
 8 G E 0.053083 0.264241 0.682676 -> 0.682676 
 9 E E 0.013978 0.211231 0.774791 -> 0.774791 
 10 L B 0.506096 0.366706 0.127199 -> 0.506096 
 11 L B 0.516601 0.374106 0.109293 -> 0.516601 
 12 Q E 0.015670 0.259024 0.725306 -> 0.725306 
 13 N E 0.022638 0.248670 0.728692 -> 0.728692 
 14 E M 0.065331 0.506077 0.428592 -> 0.506077 
 15 P E 0.101714 0.317815 0.580470 -> 0.580470 
 16 F B 0.755016 0.212482 0.032502 -> 0.755016 
 17 I B 0.581865 0.358582 0.059553 -> 0.581865 
 18 Q E 0.021419 0.241399 0.737182 -> 0.737182 
 19 L B 0.563049 0.388919 0.048032 -> 0.563049 
 20 C B 0.864925 0.119702 0.015373 -> 0.864925 
 21 T M 0.164601 0.442962 0.392437 -> 0.442962 
 22 K E 0.030885 0.439364 0.529751 -> 0.529751 
 23 I B 0.918848 0.063286 0.017866 -> 0.918848 
 24 E M 0.167522 0.612638 0.219841 -> 0.612638 
 25 N E 0.074678 0.314387 0.610935 -> 0.610935 
 26 Y M 0.465589 0.477210 0.057201 -> 0.477210 
 27 L B 0.658950 0.276132 0.064918 -> 0.658950 
 28 M M 0.325972 0.362124 0.311904 -> 0.362124 
 29 D M 0.097965 0.481453 0.420582 -> 0.481453 
 30 T M 0.263038 0.540838 0.196124 -> 0.540838 
 31 E E 0.006554 0.130421 0.863025 -> 0.863025 
 32 A E 0.194997 0.386635 0.418368 -> 0.418368 
 33 V B 0.686742 0.264447 0.048811 -> 0.686742 
 34 N M 0.165404 0.580113 0.254483 -> 0.580113 
 35 E E 0.004172 0.119787 0.876041 -> 0.876041 
 36 Q M 0.203367 0.645554 0.151079 -> 0.645554 
 37 L B 0.772691 0.198541 0.028768 -> 0.772691 
 38 I E 0.046465 0.456164 0.497371 -> 0.497371 
 39 E E 0.009384 0.266420 0.724196 -> 0.724196 
 40 L B 0.771856 0.207139 0.021005 -> 0.771856 
 41 N M 0.358985 0.554975 0.086040 -> 0.554975 
 42 E E 0.004117 0.146073 0.849810 -> 0.849810 
 43 Q E 0.046433 0.448733 0.504835 -> 0.504835 
 44 L B 0.864706 0.118876 0.016417 -> 0.864706 
 45 T M 0.295440 0.517881 0.186679 -> 0.517881 
 46 M E 0.142858 0.342660 0.514482 -> 0.514482 
 47 R M 0.098596 0.659909 0.241495 -> 0.659909 
 48 L B 0.828912 0.157539 0.013549 -> 0.828912 
 49 K E 0.002767 0.130125 0.867108 -> 0.867108 
 50 E E 0.003816 0.094325 0.901860 -> 0.901860 
 51 K E 0.003496 0.118199 0.878305 -> 0.878305 
 52 G E 0.022070 0.159732 0.818198 -> 0.818198 
 53 L M 0.344818 0.564294 0.090888 -> 0.564294 
 54 K E 0.008082 0.158660 0.833258 -> 0.833258 
 55 P E 0.031799 0.152932 0.815269 -> 0.815269 
 56 G E 0.024284 0.157490 0.818226 -> 0.818226 
 57 E E 0.021428 0.271264 0.707307 -> 0.707307 
 58 K E 0.002745 0.049869 0.947387 -> 0.947387 
 59 G E 0.052992 0.214354 0.732654 -> 0.732654 
 60 A B 0.422727 0.396730 0.180543 -> 0.422727 
 61 T M 0.200147 0.521699 0.278154 -> 0.521699 
 62 K E 0.006450 0.088047 0.905502 -> 0.905502 
 63 Q E 0.032941 0.430866 0.536193 -> 0.536193 
 64 L B 0.898635 0.080034 0.021331 -> 0.898635 
 65 R M 0.058655 0.642275 0.299071 -> 0.642275 
 66 T E 0.029683 0.268441 0.701877 -> 0.701877 
 67 L B 0.634885 0.348610 0.016505 -> 0.634885 
 68 I B 0.932915 0.058074 0.009011 -> 0.932915 
 69 Q E 0.038483 0.474739 0.486778 -> 0.486778 
 70 E E 0.022042 0.405202 0.572756 -> 0.572756 
 71 I B 0.838523 0.145646 0.015831 -> 0.838523 
 72 L B 0.646344 0.317848 0.035808 -> 0.646344 
 73 T E 0.058057 0.405787 0.536157 -> 0.536157 
 74 E E 0.018462 0.307333 0.674205 -> 0.674205 
 75 A M 0.331080 0.373971 0.294949 -> 0.373971 
 76 G B 0.407533 0.315597 0.276870 -> 0.407533 
 77 F B 0.714067 0.229802 0.056131 -> 0.714067 
 78 R E 0.044113 0.409703 0.546184 -> 0.546184 
 79 E E 0.028461 0.198971 0.772569 -> 0.772569 
 80 G M 0.306954 0.396224 0.296822 -> 0.396224 
 81 M B 0.589007 0.316898 0.094095 -> 0.589007 
 82 L B 0.643451 0.286884 0.069665 -> 0.643451 
 83 Q E 0.057587 0.311281 0.631131 -> 0.631131 
 84 T E 0.186303 0.384155 0.429541 -> 0.429541 
 85 I B 0.490332 0.391902 0.117766 -> 0.490332 
 86 G E 0.111964 0.363855 0.524181 -> 0.524181 
 87 N E 0.018365 0.163349 0.818286 -> 0.818286 
 88 K E 0.007961 0.174296 0.817742 -> 0.817742 
 89 P E 0.031230 0.216687 0.752083 -> 0.752083 
 90 L B 0.480075 0.476326 0.043599 -> 0.480075 
 91 K E 0.010088 0.171516 0.818396 -> 0.818396 
 92 K E 0.009770 0.178184 0.812045 -> 0.812045 
 93 E E 0.056162 0.384867 0.558971 -> 0.558971 
 94 D M 0.149972 0.561580 0.288448 -> 0.561580 
 95 F B 0.848405 0.138072 0.013523 -> 0.848405 
 96 M B 0.755900 0.221043 0.023056 -> 0.755900 
 97 F B 0.865871 0.123472 0.010657 -> 0.865871 
 98 L B 0.865999 0.124305 0.009696 -> 0.865999 
 99 V B 0.837278 0.147324 0.015397 -> 0.837278 
 100 S B 0.622488 0.288235 0.089277 -> 0.622488 
 101 S B 0.411770 0.382690 0.205540 -> 0.411770 
 102 G B 0.520555 0.263255 0.216190 -> 0.520555 
 103 F B 0.741966 0.227693 0.030341 -> 0.741966 
 104 M B 0.446778 0.415074 0.138147 -> 0.446778 
 105 L B 0.626137 0.326951 0.046912 -> 0.626137 
 106 K E 0.023320 0.328201 0.648479 -> 0.648479 
 107 D E 0.092751 0.392386 0.514864 -> 0.514864 
 108 S E 0.127620 0.405551 0.466829 -> 0.466829 
 109 S E 0.077845 0.283015 0.639140 -> 0.639140 
 110 L M 0.435223 0.442647 0.122130 -> 0.442647 
 111 R E 0.028713 0.235281 0.736006 -> 0.736006 
 112 A E 0.140270 0.262876 0.596854 -> 0.596854 
 113 S E 0.055363 0.387105 0.557533 -> 0.557533 
 114 S E 0.036129 0.207730 0.756141 -> 0.756141 
 115 H E 0.047684 0.339918 0.612397 -> 0.612397 
 116 G E 0.154735 0.360799 0.484466 -> 0.484466 
 117 E E 0.050041 0.317961 0.631998 -> 0.631998 
 118 L B 0.641032 0.291770 0.067198 -> 0.641032 
 119 T M 0.353669 0.487046 0.159285 -> 0.487046 
 120 H M 0.161018 0.570611 0.268371 -> 0.570611 
 121 A B 0.934549 0.059304 0.006147 -> 0.934549 
 122 I B 0.921884 0.070225 0.007891 -> 0.921884 
 123 Q M 0.326064 0.504755 0.169181 -> 0.504755 
 124 W B 0.837005 0.133030 0.029965 -> 0.837005 
 125 C B 0.980508 0.015189 0.004303 -> 0.980508 
 126 L B 0.771977 0.202028 0.025995 -> 0.771977 
 127 I B 0.686265 0.268685 0.045050 -> 0.686265 
 128 I B 0.848405 0.133747 0.017848 -> 0.848405 
 129 L B 0.730654 0.244865 0.024482 -> 0.730654 
 130 K M 0.053776 0.496038 0.450186 -> 0.496038 
 131 Q E 0.069991 0.412742 0.517266 -> 0.517266 
 132 K E 0.026831 0.276501 0.696667 -> 0.696667 
 133 K E 0.008250 0.114705 0.877045 -> 0.877045 
 134 D E 0.023690 0.297012 0.679298 -> 0.679298 
 135 S E 0.094136 0.397278 0.508585 -> 0.508585 
 136 S E 0.074440 0.370311 0.555249 -> 0.555249 
 137 F B 0.532025 0.390796 0.077179 -> 0.532025 
 138 L B 0.514730 0.376156 0.109115 -> 0.514730 
 139 E E 0.008956 0.142513 0.848531 -> 0.848531 
 140 N E 0.018279 0.190446 0.791275 -> 0.791275 
 141 I B 0.576681 0.394115 0.029204 -> 0.576681 
 142 P E 0.027720 0.236734 0.735546 -> 0.735546 
 143 T M 0.298952 0.536482 0.164566 -> 0.536482 
 144 S M 0.088495 0.569283 0.342223 -> 0.569283 
 145 E E 0.005337 0.161828 0.832835 -> 0.832835 
 146 I B 0.788780 0.187669 0.023551 -> 0.788780 
 147 C B 0.921033 0.069802 0.009165 -> 0.921033 
 148 D E 0.039072 0.424255 0.536673 -> 0.536673 
 149 R E 0.014223 0.478751 0.507026 -> 0.507026 
 150 I B 0.962769 0.033497 0.003734 -> 0.962769 
 151 Y M 0.409484 0.554988 0.035528 -> 0.554988 
 152 K E 0.001277 0.047275 0.951448 -> 0.951448 
 153 K E 0.020048 0.327994 0.651958 -> 0.651958 
 154 L B 0.527565 0.427216 0.045219 -> 0.527565 
 155 G E 0.147843 0.334863 0.517294 -> 0.517294 
 156 H E 0.071569 0.414456 0.513976 -> 0.513976 
 157 Q E 0.013851 0.146711 0.839438 -> 0.839438 
 158 D E 0.017406 0.203264 0.779330 -> 0.779330 
 159 S E 0.078143 0.340472 0.581385 -> 0.581385 
 160 S E 0.033479 0.153728 0.812793 -> 0.812793 
 161 N E 0.063235 0.449754 0.487012 -> 0.487012 
 162 P E 0.087808 0.334384 0.577808 -> 0.577808 
 163 N E 0.021394 0.135912 0.842694 -> 0.842694 
 164 Y M 0.133841 0.687509 0.178650 -> 0.687509 
 165 P M 0.153225 0.471414 0.375362 -> 0.471414 
 166 F B 0.822663 0.166848 0.010489 -> 0.822663 
 167 T M 0.171836 0.490031 0.338133 -> 0.490031 
 168 C B 0.811699 0.163492 0.024810 -> 0.811699 
 169 W B 0.822578 0.162547 0.014876 -> 0.822578 
 170 D M 0.265087 0.522872 0.212041 -> 0.522872 
 171 V M 0.424157 0.465844 0.109999 -> 0.465844 
 172 L B 0.896326 0.091193 0.012480 -> 0.896326 
 173 I B 0.494632 0.466979 0.038389 -> 0.494632 
 174 D E 0.012891 0.192112 0.794997 -> 0.794997 
 175 K E 0.015969 0.251750 0.732281 -> 0.732281 
 176 L M 0.226648 0.513850 0.259502 -> 0.513850 
 177 G E 0.059544 0.259244 0.681212 -> 0.681212 
 178 E E 0.018161 0.193728 0.788111 -> 0.788111 
 179 I E 0.114737 0.343559 0.541704 -> 0.541704 
 180 D E 0.053138 0.278738 0.668124 -> 0.668124 
 181 S E 0.146675 0.341218 0.512107 -> 0.512107 
 182 R E 0.027009 0.267880 0.705111 -> 0.705111 
 183 S M 0.179917 0.583034 0.237049 -> 0.583034 
 184 P E 0.081760 0.412085 0.506155 -> 0.506155 
 185 E E 0.007986 0.142012 0.850002 -> 0.850002 
 186 W M 0.383473 0.561168 0.055359 -> 0.561168 
 187 L B 0.766727 0.210410 0.022863 -> 0.766727 
 188 S M 0.169973 0.605626 0.224402 -> 0.605626 
 189 D E 0.004561 0.096450 0.898990 -> 0.898990 
 190 H M 0.080948 0.556091 0.362961 -> 0.556091 
 191 I B 0.694413 0.291437 0.014150 -> 0.694413 
 192 Q E 0.011040 0.268719 0.720241 -> 0.720241 
 193 N E 0.009094 0.128528 0.862379 -> 0.862379 
 194 D E 0.031679 0.463018 0.505303 -> 0.505303 
 195 E E 0.019753 0.203838 0.776409 -> 0.776409 
 196 D E 0.013838 0.167385 0.818777 -> 0.818777 
 197 Q M 0.060644 0.486861 0.452494 -> 0.486861 
 198 I B 0.717797 0.237957 0.044245 -> 0.717797 
 199 F B 0.553122 0.387091 0.059787 -> 0.553122 
 200 P E 0.095251 0.346597 0.558152 -> 0.558152 
 201 V B 0.531666 0.379566 0.088768 -> 0.531666 
 202 L B 0.898602 0.075631 0.025768 -> 0.898602 
 203 R M 0.048560 0.576273 0.375167 -> 0.576273 
 204 E E 0.020283 0.298801 0.680915 -> 0.680915 
 205 V B 0.483253 0.409375 0.107373 -> 0.483253 
 206 I M 0.312529 0.539889 0.147583 -> 0.539889 
 207 K E 0.001933 0.081730 0.916337 -> 0.916337 
 208 N E 0.007871 0.120060 0.872069 -> 0.872069 
 209 R E 0.002164 0.062009 0.935827 -> 0.935827 
