# Supplementary material for: AcconPred: Predicting Solvent Accessibility and Contact Number Simultaneously by a Multitask Learning Framework under the Conditional Neural Fields Model
Source: Biomed Res Int. 2015 Aug 3;2015:678764. doi: 10.1155/2015/678764 (PMC4538422; doi:10.1155/2015/678764)
Supplement: Supplementary file 1 — Training/testing dataset as well as the CASP11 evaluation dataset could be found in the Supplementary Material. The CASP11 evaluation dataset contains all detailed results from SPINE-X, SANN, ACCpro5 and AcconPred. [file 678764.f1.zip › Supplmentary_Files/105_casp11_domain/casp11_domain_AcconPred/T0833-D1.reso]

# AcconPred: three-state solvent accessibility prediction results 
# probabilities are in the order of B (Bury, pACC: 0-10), M (Medium, pACC: 11-40) and E (Exposed, pACC: 41-100), 
# where pACC is the relative solvent accessibility value calculated by DSSP 
# output format: <position> <one letter amino acid> <predicted label> ... <probabilities> ... -> <maximal probability> 

 1 K E 0.002959 0.026518 0.970523 -> 0.970523 
 2 D E 0.010302 0.149082 0.840616 -> 0.840616 
 3 Y M 0.104825 0.593996 0.301180 -> 0.593996 
 4 L B 0.408718 0.372798 0.218484 -> 0.408718 
 5 Y M 0.169352 0.549493 0.281155 -> 0.549493 
 6 D M 0.154464 0.526170 0.319366 -> 0.526170 
 7 T M 0.091309 0.496582 0.412109 -> 0.496582 
 8 K E 0.006597 0.200588 0.792815 -> 0.792815 
 9 E E 0.029298 0.334080 0.636622 -> 0.636622 
 10 E E 0.013604 0.185131 0.801266 -> 0.801266 
 11 N E 0.022324 0.147241 0.830434 -> 0.830434 
 12 G E 0.050097 0.257256 0.692647 -> 0.692647 
 13 K E 0.021900 0.310150 0.667950 -> 0.667950 
 14 I B 0.463997 0.424292 0.111711 -> 0.463997 
 15 I B 0.510526 0.443123 0.046351 -> 0.510526 
 16 S B 0.651456 0.312897 0.035647 -> 0.651456 
 17 K M 0.150136 0.640219 0.209645 -> 0.640219 
 18 V B 0.546992 0.388625 0.064383 -> 0.546992 
 19 V B 0.670053 0.306948 0.022999 -> 0.670053 
 20 F B 0.628399 0.337431 0.034170 -> 0.628399 
 21 L M 0.171175 0.574917 0.253908 -> 0.574917 
 22 Q E 0.040297 0.448946 0.510757 -> 0.510757 
 23 E E 0.017500 0.285147 0.697353 -> 0.697353 
 24 N E 0.008730 0.092136 0.899134 -> 0.899134 
 25 G E 0.051317 0.282877 0.665806 -> 0.665806 
 26 L M 0.189821 0.550159 0.260020 -> 0.550159 
 27 L B 0.537253 0.318070 0.144677 -> 0.537253 
 28 N M 0.171107 0.582589 0.246304 -> 0.582589 
 29 K E 0.020013 0.218663 0.761324 -> 0.761324 
 30 Q M 0.116896 0.610058 0.273046 -> 0.610058 
 31 V B 0.513189 0.408052 0.078759 -> 0.513189 
 32 R M 0.095710 0.593765 0.310526 -> 0.593765 
 33 Y B 0.486293 0.464187 0.049521 -> 0.486293 
 34 E M 0.089131 0.589665 0.321203 -> 0.589665 
 35 F B 0.845016 0.143758 0.011226 -> 0.845016 
 36 Q M 0.048344 0.555310 0.396347 -> 0.555310 
 37 Y B 0.505349 0.443410 0.051241 -> 0.505349 
 38 N M 0.156616 0.667670 0.175714 -> 0.667670 
 39 E E 0.010588 0.131713 0.857700 -> 0.857700 
 40 N E 0.001352 0.030926 0.967722 -> 0.967722 
 41 G E 0.031318 0.284835 0.683847 -> 0.683847 
 42 K E 0.022509 0.317082 0.660409 -> 0.660409 
 43 V M 0.253977 0.596467 0.149556 -> 0.596467 
 44 S M 0.119173 0.526894 0.353932 -> 0.526894 
 45 E E 0.027479 0.317374 0.655147 -> 0.655147 
 46 K E 0.045984 0.433580 0.520436 -> 0.520436 
 47 K E 0.016223 0.251173 0.732604 -> 0.732604 
 48 A M 0.350843 0.456042 0.193115 -> 0.456042 
 49 F M 0.279209 0.601751 0.119039 -> 0.601751 
 50 R E 0.056529 0.461819 0.481652 -> 0.481652 
 51 W B 0.542811 0.400734 0.056456 -> 0.542811 
 52 D M 0.360489 0.523552 0.115960 -> 0.523552 
 53 R E 0.031437 0.312254 0.656308 -> 0.656308 
 54 T E 0.014106 0.171274 0.814620 -> 0.814620 
 55 N E 0.045967 0.371056 0.582977 -> 0.582977 
 56 D E 0.016002 0.180123 0.803876 -> 0.803876 
 57 E E 0.019360 0.294492 0.686148 -> 0.686148 
 58 W M 0.438088 0.458223 0.103689 -> 0.458223 
 59 V M 0.131716 0.633191 0.235093 -> 0.633191 
 60 P E 0.080781 0.356207 0.563012 -> 0.563012 
 61 F M 0.246530 0.532026 0.221444 -> 0.532026 
 62 Y M 0.412218 0.482335 0.105447 -> 0.482335 
 63 Q M 0.210985 0.597743 0.191273 -> 0.597743 
 64 I B 0.862632 0.124984 0.012384 -> 0.862632 
 65 T M 0.264014 0.600697 0.135288 -> 0.600697 
 66 Y B 0.748188 0.232041 0.019771 -> 0.748188 
 67 Q M 0.076046 0.660782 0.263172 -> 0.660782 
 68 Y B 0.503503 0.433434 0.063063 -> 0.503503 
 69 D M 0.160990 0.630520 0.208490 -> 0.630520 
 70 D E 0.021290 0.158850 0.819861 -> 0.819861 
 71 Q E 0.005622 0.093117 0.901262 -> 0.901262 
 72 S E 0.063298 0.237343 0.699359 -> 0.699359 
 73 G M 0.182841 0.505404 0.311755 -> 0.505404 
 74 E M 0.099073 0.458863 0.442064 -> 0.458863 
 75 I B 0.688585 0.289335 0.022079 -> 0.688585 
 76 K M 0.050367 0.528275 0.421358 -> 0.528275 
 77 T B 0.704347 0.269487 0.026166 -> 0.704347 
 78 N M 0.280029 0.579572 0.140400 -> 0.579572 
 79 Y B 0.575629 0.386141 0.038230 -> 0.575629 
 80 G B 0.800642 0.164173 0.035184 -> 0.800642 
 81 M M 0.177280 0.599234 0.223486 -> 0.599234 
 82 W B 0.543466 0.374455 0.082080 -> 0.543466 
 83 D M 0.429019 0.487048 0.083933 -> 0.487048 
 84 K E 0.009314 0.116827 0.873859 -> 0.873859 
 85 K E 0.004135 0.070551 0.925314 -> 0.925314 
 86 K E 0.013491 0.248080 0.738429 -> 0.738429 
 87 K E 0.004823 0.120317 0.874860 -> 0.874860 
 88 N E 0.020255 0.261606 0.718139 -> 0.718139 
 89 F B 0.582964 0.387614 0.029422 -> 0.582964 
 90 S E 0.038601 0.226151 0.735248 -> 0.735248 
 91 L M 0.142676 0.498531 0.358793 -> 0.498531 
 92 N E 0.068225 0.317659 0.614116 -> 0.614116 
 93 V M 0.246827 0.582959 0.170214 -> 0.582959 
 94 Q E 0.011381 0.236316 0.752303 -> 0.752303 
 95 N M 0.119407 0.619309 0.261284 -> 0.619309 
 96 M B 0.844484 0.145086 0.010430 -> 0.844484 
 97 I M 0.427223 0.474482 0.098295 -> 0.474482 
 98 I B 0.827681 0.152276 0.020043 -> 0.827681 
 99 P B 0.649392 0.307785 0.042823 -> 0.649392 
 100 S B 0.803932 0.164928 0.031140 -> 0.803932 
 101 T M 0.349723 0.505715 0.144562 -> 0.505715 
 102 N M 0.270681 0.435910 0.293408 -> 0.435910 
 103 Y M 0.070818 0.484841 0.444341 -> 0.484841 
 104 E E 0.016956 0.184999 0.798045 -> 0.798045 
 105 E E 0.020087 0.266925 0.712988 -> 0.712988 
 106 I M 0.255920 0.446877 0.297203 -> 0.446877 
 107 F M 0.161367 0.490936 0.347696 -> 0.490936 
 108 S E 0.001166 0.020611 0.978223 -> 0.978223 
