# Supplementary material for: AcconPred: Predicting Solvent Accessibility and Contact Number Simultaneously by a Multitask Learning Framework under the Conditional Neural Fields Model
Source: Biomed Res Int. 2015 Aug 3;2015:678764. doi: 10.1155/2015/678764 (PMC4538422; doi:10.1155/2015/678764)
Supplement: Supplementary file 1 — Training/testing dataset as well as the CASP11 evaluation dataset could be found in the Supplementary Material. The CASP11 evaluation dataset contains all detailed results from SPINE-X, SANN, ACCpro5 and AcconPred. [file 678764.f1.zip › Supplmentary_Files/105_casp11_domain/casp11_domain_AcconPred/T0834-D1.reso]

# AcconPred: three-state solvent accessibility prediction results 
# probabilities are in the order of B (Bury, pACC: 0-10), M (Medium, pACC: 11-40) and E (Exposed, pACC: 41-100), 
# where pACC is the relative solvent accessibility value calculated by DSSP 
# output format: <position> <one letter amino acid> <predicted label> ... <probabilities> ... -> <maximal probability> 

 1 S E 0.011853 0.055335 0.932811 -> 0.932811 
 2 L E 0.069004 0.406186 0.524810 -> 0.524810 
 3 P E 0.026541 0.247223 0.726236 -> 0.726236 
 4 E E 0.003724 0.102111 0.894166 -> 0.894166 
 5 R M 0.059206 0.547543 0.393251 -> 0.547543 
 6 I B 0.495308 0.467037 0.037655 -> 0.495308 
 7 D E 0.019599 0.269842 0.710559 -> 0.710559 
 8 L M 0.174957 0.591264 0.233779 -> 0.591264 
 9 F B 0.974550 0.019943 0.005508 -> 0.974550 
 10 V M 0.372220 0.574032 0.053748 -> 0.574032 
 11 S E 0.018765 0.169226 0.812009 -> 0.812009 
 12 L B 0.601021 0.372444 0.026535 -> 0.601021 
 13 F B 0.827555 0.156849 0.015595 -> 0.827555 
 14 D E 0.022215 0.240583 0.737202 -> 0.737202 
 15 Y E 0.064346 0.427229 0.508425 -> 0.508425 
 16 N E 0.034864 0.220508 0.744629 -> 0.744629 
 17 S E 0.066970 0.332512 0.600518 -> 0.600518 
 18 A B 0.431498 0.249203 0.319299 -> 0.431498 
 19 T E 0.173358 0.350983 0.475660 -> 0.475660 
 20 T E 0.115229 0.407288 0.477483 -> 0.477483 
 21 S M 0.345010 0.381873 0.273116 -> 0.381873 
 22 Y M 0.417688 0.429161 0.153151 -> 0.429161 
 23 D M 0.385810 0.421333 0.192857 -> 0.421333 
 24 I B 0.751232 0.190347 0.058420 -> 0.751232 
 25 R M 0.118648 0.487926 0.393426 -> 0.487926 
 26 S M 0.354974 0.409822 0.235205 -> 0.409822 
 27 I B 0.673064 0.264462 0.062473 -> 0.673064 
 28 Q M 0.243079 0.555481 0.201440 -> 0.555481 
 29 T E 0.038759 0.254583 0.706657 -> 0.706657 
 30 D E 0.013715 0.156108 0.830177 -> 0.830177 
 31 F M 0.432648 0.475822 0.091530 -> 0.475822 
 32 P M 0.174695 0.426069 0.399236 -> 0.426069 
 33 T E 0.134708 0.358480 0.506812 -> 0.506812 
 34 R E 0.023181 0.349940 0.626879 -> 0.626879 
 35 L M 0.374843 0.484678 0.140480 -> 0.484678 
 36 L B 0.537839 0.380260 0.081901 -> 0.537839 
 37 Q E 0.019335 0.248628 0.732037 -> 0.732037 
 38 E E 0.049423 0.291815 0.658761 -> 0.658761 
 39 R M 0.101088 0.582935 0.315977 -> 0.582935 
 40 P E 0.038812 0.150333 0.810855 -> 0.810855 
 41 N E 0.040097 0.129029 0.830874 -> 0.830874 
 42 A M 0.290637 0.463621 0.245741 -> 0.463621 
 43 A E 0.055310 0.276416 0.668274 -> 0.668274 
 44 E E 0.009453 0.094105 0.896442 -> 0.896442 
 45 G E 0.090616 0.298953 0.610431 -> 0.610431 
 46 T M 0.146934 0.428147 0.424919 -> 0.428147 
 47 L B 0.599121 0.313332 0.087547 -> 0.599121 
 48 L B 0.520797 0.380661 0.098542 -> 0.520797 
 49 Y E 0.083539 0.365737 0.550724 -> 0.550724 
 50 H M 0.178529 0.495232 0.326239 -> 0.495232 
 51 L B 0.755020 0.191734 0.053245 -> 0.755020 
 52 Q E 0.054436 0.378903 0.566660 -> 0.566660 
 53 N E 0.032970 0.210845 0.756185 -> 0.756185 
 54 M M 0.342179 0.472444 0.185377 -> 0.472444 
 55 G E 0.092329 0.452697 0.454974 -> 0.454974 
 56 E E 0.028539 0.306757 0.664705 -> 0.664705 
 57 D E 0.022655 0.242120 0.735224 -> 0.735224 
 58 A B 0.654919 0.288373 0.056708 -> 0.654919 
 59 I B 0.815443 0.152399 0.032158 -> 0.815443 
 60 N M 0.224467 0.605645 0.169887 -> 0.605645 
 61 A B 0.682993 0.233869 0.083138 -> 0.682993 
 62 L B 0.741596 0.208920 0.049484 -> 0.741596 
 63 V B 0.489475 0.359984 0.150541 -> 0.489475 
 64 S E 0.182407 0.331091 0.486503 -> 0.486503 
 65 G M 0.320671 0.344683 0.334646 -> 0.344683 
 66 A B 0.565949 0.296559 0.137492 -> 0.565949 
 67 S E 0.170513 0.406628 0.422859 -> 0.422859 
 68 M B 0.386166 0.358886 0.254947 -> 0.386166 
 69 F B 0.527684 0.341042 0.131274 -> 0.527684 
 70 G B 0.357445 0.333015 0.309540 -> 0.357445 
 71 S E 0.098493 0.323015 0.578492 -> 0.578492 
 72 G E 0.052188 0.241332 0.706480 -> 0.706480 
 73 S E 0.129098 0.414777 0.456124 -> 0.456124 
 74 D M 0.185454 0.526442 0.288104 -> 0.526442 
 75 L B 0.757260 0.212591 0.030149 -> 0.757260 
 76 W B 0.482699 0.455564 0.061737 -> 0.482699 
 77 L B 0.811688 0.177871 0.010441 -> 0.811688 
 78 R M 0.173000 0.648146 0.178854 -> 0.648146 
 79 K E 0.024368 0.231344 0.744288 -> 0.744288 
 80 G E 0.066597 0.248436 0.684966 -> 0.684966 
 81 D E 0.089021 0.377880 0.533099 -> 0.533099 
 82 I M 0.170668 0.563236 0.266096 -> 0.563236 
 83 Y M 0.437307 0.473702 0.088990 -> 0.473702 
 84 Y M 0.202250 0.653627 0.144123 -> 0.653627 
 85 L B 0.780336 0.190364 0.029300 -> 0.780336 
 86 F B 0.654452 0.308241 0.037307 -> 0.654452 
 87 N M 0.093998 0.540888 0.365115 -> 0.540888 
 88 E E 0.054190 0.462644 0.483166 -> 0.483166 
 89 E E 0.010125 0.156366 0.833509 -> 0.833509 
 90 T M 0.397403 0.486377 0.116220 -> 0.486377 
 91 W B 0.842353 0.141374 0.016273 -> 0.842353 
 92 L M 0.091176 0.548645 0.360179 -> 0.548645 
 93 T E 0.018585 0.213620 0.767795 -> 0.767795 
 94 N M 0.227850 0.617462 0.154688 -> 0.617462 
 95 A B 0.550339 0.307882 0.141780 -> 0.550339 
 96 N E 0.009629 0.087951 0.902419 -> 0.902419 
 97 K E 0.002423 0.063867 0.933710 -> 0.933710 
 98 A E 0.046782 0.213891 0.739328 -> 0.739328 
 99 G E 0.004825 0.046926 0.948248 -> 0.948248 
