# Supplementary material for: AcconPred: Predicting Solvent Accessibility and Contact Number Simultaneously by a Multitask Learning Framework under the Conditional Neural Fields Model
Source: Biomed Res Int. 2015 Aug 3;2015:678764. doi: 10.1155/2015/678764 (PMC4538422; doi:10.1155/2015/678764)
Supplement: Supplementary file 1 — Training/testing dataset as well as the CASP11 evaluation dataset could be found in the Supplementary Material. The CASP11 evaluation dataset contains all detailed results from SPINE-X, SANN, ACCpro5 and AcconPred. [file 678764.f1.zip › Supplmentary_Files/105_casp11_domain/casp11_domain_AcconPred/T0834-D2.reso]

# AcconPred: three-state solvent accessibility prediction results 
# probabilities are in the order of B (Bury, pACC: 0-10), M (Medium, pACC: 11-40) and E (Exposed, pACC: 41-100), 
# where pACC is the relative solvent accessibility value calculated by DSSP 
# output format: <position> <one letter amino acid> <predicted label> ... <probabilities> ... -> <maximal probability> 

 1 T E 0.002509 0.026464 0.971027 -> 0.971027 
 2 P E 0.012208 0.132619 0.855173 -> 0.855173 
 3 D E 0.006220 0.096008 0.897771 -> 0.897771 
 4 S E 0.077293 0.306700 0.616007 -> 0.616007 
 5 M E 0.051302 0.291615 0.657083 -> 0.657083 
 6 L M 0.313777 0.526371 0.159853 -> 0.526371 
 7 P E 0.103568 0.371578 0.524855 -> 0.524855 
 8 Q E 0.018399 0.174095 0.807506 -> 0.807506 
 9 T M 0.172495 0.480617 0.346888 -> 0.480617 
 10 S E 0.045795 0.244426 0.709778 -> 0.709778 
 11 E E 0.003235 0.076290 0.920474 -> 0.920474 
 12 Y M 0.481648 0.491003 0.027349 -> 0.491003 
 13 P M 0.059812 0.515816 0.424373 -> 0.515816 
 14 L B 0.480421 0.469887 0.049693 -> 0.480421 
 15 K E 0.004546 0.124303 0.871151 -> 0.871151 
 16 D M 0.197436 0.689006 0.113558 -> 0.689006 
 17 I B 0.981055 0.013514 0.005432 -> 0.981055 
 18 Q M 0.100306 0.550011 0.349684 -> 0.550011 
 19 L M 0.123364 0.610729 0.265907 -> 0.610729 
 20 L B 0.899409 0.085619 0.014972 -> 0.899409 
 21 Y M 0.241673 0.673339 0.084989 -> 0.673339 
 22 K E 0.006175 0.152494 0.841331 -> 0.841331 
 23 L M 0.400250 0.517003 0.082747 -> 0.517003 
 24 A M 0.383416 0.443568 0.173016 -> 0.443568 
 25 Q E 0.008707 0.077429 0.913865 -> 0.913865 
 26 S E 0.013282 0.187968 0.798750 -> 0.798750 
 27 C M 0.451926 0.495774 0.052300 -> 0.495774 
 28 T E 0.069328 0.376875 0.553798 -> 0.553798 
 29 P E 0.153082 0.284005 0.562913 -> 0.562913 
 30 L E 0.104651 0.447159 0.448190 -> 0.448190 
 31 I B 0.475954 0.453724 0.070322 -> 0.475954 
 32 T E 0.053971 0.282034 0.663995 -> 0.663995 
 33 E E 0.041218 0.404038 0.554744 -> 0.554744 
 34 P M 0.402917 0.462482 0.134601 -> 0.462482 
 35 L B 0.852466 0.133400 0.014134 -> 0.852466 
 36 V B 0.488792 0.436460 0.074748 -> 0.488792 
 37 F B 0.890373 0.085875 0.023752 -> 0.890373 
 38 T B 0.747135 0.215745 0.037120 -> 0.747135 
 39 R M 0.235806 0.605967 0.158228 -> 0.605967 
 40 S B 0.589232 0.303182 0.107586 -> 0.589232 
 41 L B 0.620845 0.325764 0.053392 -> 0.620845 
 42 C B 0.528602 0.413137 0.058261 -> 0.528602 
 43 K E 0.007041 0.138326 0.854634 -> 0.854634 
 44 G E 0.019329 0.110110 0.870561 -> 0.870561 
 45 S E 0.026164 0.276665 0.697171 -> 0.697171 
 46 S E 0.026633 0.207856 0.765512 -> 0.765512 
 47 L B 0.595015 0.375511 0.029474 -> 0.595015 
 48 S M 0.141034 0.547362 0.311604 -> 0.547362 
 49 P E 0.059594 0.335964 0.604442 -> 0.604442 
 50 R E 0.019225 0.283768 0.697008 -> 0.697008 
 51 W B 0.644873 0.318712 0.036416 -> 0.644873 
 52 F B 0.828409 0.144690 0.026900 -> 0.828409 
 53 A E 0.093703 0.281124 0.625173 -> 0.625173 
 54 R E 0.016764 0.246605 0.736631 -> 0.736631 
 55 S M 0.341584 0.458275 0.200141 -> 0.458275 
 56 G M 0.327163 0.336856 0.335981 -> 0.336856 
 57 L M 0.262673 0.449427 0.287899 -> 0.449427 
 58 I M 0.258077 0.388424 0.353500 -> 0.388424 
 59 H M 0.333561 0.463160 0.203280 -> 0.463160 
 60 P E 0.204304 0.313273 0.482423 -> 0.482423 
 61 G E 0.340423 0.289998 0.369579 -> 0.369579 
 62 G E 0.305769 0.287544 0.406686 -> 0.406686 
 63 G B 0.461775 0.308592 0.229633 -> 0.461775 
 64 T M 0.247797 0.383376 0.368826 -> 0.383376 
 65 Y M 0.405587 0.472863 0.121550 -> 0.472863 
 66 A B 0.895686 0.076160 0.028155 -> 0.895686 
 67 F M 0.394607 0.458880 0.146513 -> 0.458880 
 68 R M 0.129747 0.518009 0.352244 -> 0.518009 
 69 Y B 0.507058 0.460181 0.032761 -> 0.507058 
 70 A B 0.808035 0.175552 0.016413 -> 0.808035 
 71 E E 0.012230 0.160330 0.827440 -> 0.827440 
 72 K E 0.006062 0.121352 0.872586 -> 0.872586 
 73 Y M 0.279438 0.659061 0.061501 -> 0.659061 
 74 P E 0.088066 0.322811 0.589124 -> 0.589124 
 75 A E 0.013747 0.062011 0.924243 -> 0.924243 
 76 Q E 0.015988 0.260958 0.723054 -> 0.723054 
 77 F M 0.226212 0.587952 0.185836 -> 0.587952 
 78 A E 0.014263 0.103539 0.882197 -> 0.882197 
 79 N E 0.003514 0.143760 0.852726 -> 0.852726 
 80 L B 0.588769 0.367792 0.043440 -> 0.588769 
 81 L M 0.135268 0.583209 0.281524 -> 0.583209 
 82 P E 0.010206 0.129982 0.859812 -> 0.859812 
 83 Y M 0.235647 0.609814 0.154539 -> 0.609814 
 84 M B 0.426881 0.364474 0.208645 -> 0.426881 
 85 H E 0.036148 0.201106 0.762746 -> 0.762746 
 86 I E 0.018710 0.259209 0.722080 -> 0.722080 
