# Supplementary material for: AcconPred: Predicting Solvent Accessibility and Contact Number Simultaneously by a Multitask Learning Framework under the Conditional Neural Fields Model
Source: Biomed Res Int. 2015 Aug 3;2015:678764. doi: 10.1155/2015/678764 (PMC4538422; doi:10.1155/2015/678764)
Supplement: Supplementary file 1 — Training/testing dataset as well as the CASP11 evaluation dataset could be found in the Supplementary Material. The CASP11 evaluation dataset contains all detailed results from SPINE-X, SANN, ACCpro5 and AcconPred. [file 678764.f1.zip › Supplmentary_Files/105_casp11_domain/casp11_domain_AcconPred/T0835-D1.reso]

# AcconPred: three-state solvent accessibility prediction results 
# probabilities are in the order of B (Bury, pACC: 0-10), M (Medium, pACC: 11-40) and E (Exposed, pACC: 41-100), 
# where pACC is the relative solvent accessibility value calculated by DSSP 
# output format: <position> <one letter amino acid> <predicted label> ... <probabilities> ... -> <maximal probability> 

 1 K E 0.008084 0.050196 0.941720 -> 0.941720 
 2 L M 0.113019 0.513649 0.373331 -> 0.513649 
 3 V M 0.382943 0.448587 0.168469 -> 0.448587 
 4 N E 0.032837 0.345359 0.621805 -> 0.621805 
 5 A B 0.449685 0.412162 0.138154 -> 0.449685 
 6 E E 0.001144 0.088073 0.910783 -> 0.910783 
 7 H M 0.443868 0.460057 0.096075 -> 0.460057 
 8 L B 0.793061 0.187415 0.019524 -> 0.793061 
 9 D E 0.042473 0.468695 0.488833 -> 0.488833 
 10 A M 0.300849 0.518284 0.180866 -> 0.518284 
 11 L B 0.882131 0.097786 0.020083 -> 0.882131 
 12 Y M 0.120280 0.721859 0.157862 -> 0.721859 
 13 Q E 0.002801 0.076997 0.920202 -> 0.920202 
 14 K E 0.014008 0.225825 0.760167 -> 0.760167 
 15 V B 0.458850 0.446149 0.095001 -> 0.458850 
 16 T E 0.251477 0.328458 0.420066 -> 0.420066 
 17 V M 0.288508 0.382820 0.328671 -> 0.382820 
 18 A E 0.132111 0.366891 0.500998 -> 0.500998 
 19 N E 0.090810 0.280421 0.628769 -> 0.628769 
 20 K E 0.103281 0.437877 0.458842 -> 0.458842 
 21 T B 0.338960 0.332517 0.328523 -> 0.338960 
 22 E M 0.106846 0.453224 0.439930 -> 0.453224 
 23 L B 0.572560 0.360226 0.067214 -> 0.572560 
 24 G B 0.836539 0.138654 0.024807 -> 0.836539 
 25 L B 0.916883 0.070509 0.012608 -> 0.916883 
 26 I B 0.968394 0.029113 0.002493 -> 0.968394 
 27 H B 0.849139 0.137278 0.013583 -> 0.849139 
 28 I B 0.925298 0.067072 0.007630 -> 0.925298 
 29 Y B 0.593999 0.389943 0.016059 -> 0.593999 
 30 S B 0.723029 0.259976 0.016995 -> 0.723029 
 31 E E 0.055258 0.448435 0.496307 -> 0.496307 
 32 F M 0.428480 0.460293 0.111227 -> 0.460293 
 33 P E 0.193201 0.347805 0.458994 -> 0.458994 
 34 D E 0.069362 0.265264 0.665374 -> 0.665374 
 35 Y M 0.226819 0.587141 0.186040 -> 0.587141 
 36 R E 0.098902 0.445185 0.455912 -> 0.455912 
 37 W M 0.331149 0.537542 0.131309 -> 0.537542 
 38 V B 0.689613 0.276483 0.033904 -> 0.689613 
 39 K E 0.032377 0.287636 0.679987 -> 0.679987 
 40 D M 0.233086 0.418083 0.348831 -> 0.418083 
 41 P M 0.165468 0.462325 0.372206 -> 0.462325 
 42 I E 0.097619 0.360395 0.541985 -> 0.541985 
 43 E E 0.094737 0.394177 0.511085 -> 0.511085 
 44 G E 0.103646 0.258512 0.637842 -> 0.637842 
 45 V M 0.406564 0.458451 0.134985 -> 0.458451 
 46 S B 0.626692 0.319570 0.053738 -> 0.626692 
 47 A B 0.565474 0.339227 0.095299 -> 0.565474 
 48 I B 0.481389 0.442953 0.075657 -> 0.481389 
 49 D B 0.756360 0.210020 0.033619 -> 0.756360 
 50 D B 0.736220 0.238051 0.025729 -> 0.736220 
 51 V B 0.944550 0.050321 0.005129 -> 0.944550 
 52 A B 0.977985 0.020559 0.001456 -> 0.977985 
 53 R B 0.590195 0.392977 0.016828 -> 0.590195 
 54 A B 0.994731 0.004129 0.001140 -> 0.994731 
 55 A B 0.989610 0.010032 0.000358 -> 0.989610 
 56 I B 0.946363 0.050444 0.003192 -> 0.946363 
 57 F B 0.994335 0.004855 0.000809 -> 0.994335 
 58 Y B 0.974411 0.024351 0.001238 -> 0.974411 
 59 Q B 0.948242 0.046700 0.005058 -> 0.948242 
 60 R M 0.239400 0.702009 0.058591 -> 0.702009 
 61 Q B 0.821381 0.155667 0.022952 -> 0.821381 
 62 Y B 0.512688 0.470457 0.016855 -> 0.512688 
 63 Q E 0.031976 0.213031 0.754993 -> 0.754993 
 64 A M 0.109853 0.462717 0.427430 -> 0.462717 
 65 T M 0.294605 0.475475 0.229920 -> 0.475475 
 66 G E 0.014883 0.121080 0.864038 -> 0.864038 
 67 S E 0.019919 0.455780 0.524302 -> 0.524302 
 68 A E 0.004825 0.028169 0.967006 -> 0.967006 
 69 A E 0.037184 0.410012 0.552805 -> 0.552805 
 70 D B 0.609043 0.342707 0.048249 -> 0.609043 
 71 L M 0.215591 0.726360 0.058050 -> 0.726360 
 72 E E 0.007374 0.146008 0.846618 -> 0.846618 
 73 K M 0.186389 0.681452 0.132158 -> 0.681452 
 74 V B 0.991222 0.005436 0.003341 -> 0.991222 
 75 K M 0.023919 0.592065 0.384015 -> 0.592065 
 76 S M 0.166850 0.642046 0.191104 -> 0.642046 
 77 L B 0.973009 0.024464 0.002527 -> 0.973009 
 78 V B 0.968067 0.031388 0.000545 -> 0.968067 
 79 E M 0.047275 0.644271 0.308454 -> 0.644271 
 80 F B 0.762528 0.220897 0.016575 -> 0.762528 
 81 I B 0.983144 0.012993 0.003863 -> 0.983144 
 82 L M 0.442487 0.514784 0.042729 -> 0.514784 
 83 Y M 0.110725 0.735060 0.154215 -> 0.735060 
 84 Q B 0.837151 0.138681 0.024168 -> 0.837151 
 85 R M 0.368919 0.529492 0.101589 -> 0.529492 
 86 A M 0.295730 0.586058 0.118212 -> 0.586058 
 87 D E 0.007558 0.117511 0.874931 -> 0.874931 
 88 N E 0.025373 0.168641 0.805986 -> 0.805986 
 89 G B 0.476489 0.440876 0.082634 -> 0.476489 
 90 Y M 0.169826 0.701592 0.128582 -> 0.701592 
 91 F B 0.963876 0.033627 0.002497 -> 0.963876 
 92 Y B 0.695208 0.296509 0.008283 -> 0.695208 
 93 N B 0.894283 0.099011 0.006706 -> 0.894283 
 94 F B 0.906975 0.085006 0.008020 -> 0.906975 
 95 I B 0.750670 0.229162 0.020168 -> 0.750670 
 96 Y B 0.592408 0.373611 0.033980 -> 0.592408 
 97 P B 0.436749 0.374319 0.188932 -> 0.436749 
 98 D M 0.279030 0.438898 0.282072 -> 0.438898 
 99 H M 0.179159 0.542795 0.278045 -> 0.542795 
 100 S E 0.042793 0.333499 0.623708 -> 0.623708 
 101 I M 0.359867 0.449998 0.190136 -> 0.449998 
 102 N M 0.174963 0.540900 0.284137 -> 0.540900 
 103 K E 0.006061 0.095683 0.898257 -> 0.898257 
 104 E E 0.019296 0.202400 0.778305 -> 0.778305 
 105 Y M 0.188230 0.622514 0.189256 -> 0.622514 
 106 K E 0.010634 0.161007 0.828359 -> 0.828359 
 107 T E 0.049583 0.245104 0.705313 -> 0.705313 
 108 S E 0.137677 0.347262 0.515061 -> 0.515061 
 109 V E 0.051850 0.321614 0.626536 -> 0.626536 
 110 A E 0.048104 0.222095 0.729801 -> 0.729801 
 111 E E 0.041207 0.350717 0.608075 -> 0.608075 
 112 P M 0.246158 0.393859 0.359983 -> 0.393859 
 113 N M 0.359382 0.510065 0.130553 -> 0.510065 
 114 W B 0.666700 0.303050 0.030250 -> 0.666700 
 115 W B 0.604662 0.371789 0.023549 -> 0.604662 
 116 T B 0.920709 0.068442 0.010849 -> 0.920709 
 117 W B 0.946284 0.049679 0.004037 -> 0.946284 
 118 R B 0.701669 0.283693 0.014638 -> 0.701669 
 119 A B 0.984100 0.013935 0.001965 -> 0.984100 
 120 L B 0.958065 0.039946 0.001989 -> 0.958065 
 121 W B 0.714720 0.272304 0.012976 -> 0.714720 
 122 A B 0.957791 0.036245 0.005964 -> 0.957791 
 123 L B 0.797708 0.189500 0.012792 -> 0.797708 
 124 T B 0.516046 0.345320 0.138634 -> 0.516046 
 125 Q M 0.127037 0.712155 0.160809 -> 0.712155 
 126 V B 0.971773 0.022941 0.005286 -> 0.971773 
 127 Y M 0.315877 0.621258 0.062864 -> 0.621258 
 128 P E 0.055320 0.211199 0.733481 -> 0.733481 
 129 T M 0.324898 0.501277 0.173825 -> 0.501277 
 130 L M 0.437049 0.465088 0.097863 -> 0.465088 
 131 V E 0.134055 0.412751 0.453194 -> 0.453194 
 132 K E 0.008210 0.116557 0.875233 -> 0.875233 
 133 T E 0.048317 0.305772 0.645911 -> 0.645911 
 134 D M 0.111456 0.511665 0.376879 -> 0.511665 
 135 N E 0.024414 0.234581 0.741005 -> 0.741005 
 136 A E 0.063466 0.401323 0.535210 -> 0.535210 
 137 L B 0.787670 0.184430 0.027900 -> 0.787670 
 138 A B 0.660247 0.295739 0.044014 -> 0.660247 
 139 Q E 0.010207 0.163404 0.826388 -> 0.826388 
 140 R M 0.067240 0.700143 0.232617 -> 0.700143 
 141 T B 0.965852 0.028212 0.005936 -> 0.965852 
 142 R M 0.114025 0.759460 0.126514 -> 0.759460 
 143 E E 0.012034 0.151740 0.836226 -> 0.836226 
 144 T M 0.423773 0.528814 0.047413 -> 0.528814 
 145 I B 0.991402 0.006346 0.002252 -> 0.991402 
 146 F M 0.131852 0.628995 0.239153 -> 0.628995 
 147 A E 0.052173 0.232182 0.715645 -> 0.715645 
 148 T B 0.724088 0.238218 0.037693 -> 0.724088 
 149 I B 0.748753 0.236820 0.014428 -> 0.748753 
 150 D E 0.013443 0.182916 0.803641 -> 0.803641 
 151 V M 0.259645 0.497188 0.243167 -> 0.497188 
 152 I B 0.841793 0.143718 0.014489 -> 0.841793 
 153 Y M 0.115050 0.574641 0.310310 -> 0.574641 
 154 K E 0.010953 0.141861 0.847185 -> 0.847185 
 155 D E 0.157672 0.415280 0.427048 -> 0.427048 
 156 F M 0.309967 0.472889 0.217144 -> 0.472889 
 157 N E 0.101208 0.321845 0.576947 -> 0.576947 
 158 F M 0.359306 0.367481 0.273213 -> 0.367481 
 159 K E 0.071724 0.259422 0.668854 -> 0.668854 
 160 Q E 0.085661 0.353420 0.560919 -> 0.560919 
 161 T E 0.113179 0.338513 0.548308 -> 0.548308 
 162 R E 0.068789 0.343571 0.587640 -> 0.587640 
 163 G E 0.132993 0.324240 0.542767 -> 0.542767 
 164 E E 0.038800 0.264680 0.696520 -> 0.696520 
 165 K E 0.009036 0.139806 0.851158 -> 0.851158 
 166 E E 0.017476 0.141192 0.841332 -> 0.841332 
 167 G E 0.025732 0.103918 0.870350 -> 0.870350 
 168 V M 0.247283 0.596360 0.156357 -> 0.596360 
 169 A E 0.175937 0.270366 0.553697 -> 0.553697 
 170 V M 0.273120 0.509869 0.217012 -> 0.509869 
 171 P M 0.357964 0.363826 0.278211 -> 0.363826 
 172 E E 0.078660 0.242954 0.678386 -> 0.678386 
 173 W M 0.323442 0.385118 0.291440 -> 0.385118 
 174 L B 0.493448 0.403333 0.103218 -> 0.493448 
 175 P E 0.095104 0.296826 0.608070 -> 0.608070 
 176 H E 0.042940 0.227607 0.729453 -> 0.729453 
 177 T E 0.111735 0.393396 0.494869 -> 0.494869 
 178 A B 0.443439 0.381287 0.175275 -> 0.443439 
 179 G B 0.548851 0.295568 0.155581 -> 0.548851 
 180 D B 0.471892 0.413714 0.114394 -> 0.471892 
 181 Q B 0.822592 0.128445 0.048964 -> 0.822592 
 182 A B 0.872816 0.119758 0.007426 -> 0.872816 
 183 S B 0.957062 0.036659 0.006279 -> 0.957062 
 184 V B 0.891277 0.100597 0.008127 -> 0.891277 
 185 L B 0.970924 0.026222 0.002854 -> 0.970924 
 186 L B 0.982200 0.016550 0.001250 -> 0.982200 
 187 M B 0.660075 0.324628 0.015298 -> 0.660075 
 188 A B 0.988119 0.009732 0.002149 -> 0.988119 
 189 L B 0.956941 0.039244 0.003814 -> 0.956941 
 190 S B 0.742560 0.216527 0.040913 -> 0.742560 
 191 D M 0.258733 0.621430 0.119838 -> 0.621430 
 192 A B 0.867753 0.112046 0.020201 -> 0.867753 
 193 Q M 0.239136 0.629756 0.131107 -> 0.629756 
 194 A E 0.059825 0.195571 0.744603 -> 0.744603 
 195 L M 0.339808 0.552186 0.108006 -> 0.552186 
 196 E E 0.055456 0.345538 0.599006 -> 0.599006 
 197 A E 0.015063 0.126779 0.858159 -> 0.858159 
 198 K E 0.013194 0.439340 0.547465 -> 0.547465 
 199 P E 0.001742 0.030304 0.967954 -> 0.967954 
 200 E E 0.009442 0.277087 0.713471 -> 0.713471 
 201 I B 0.930780 0.060479 0.008741 -> 0.930780 
 202 E M 0.048023 0.691833 0.260144 -> 0.691833 
 203 K E 0.002467 0.085428 0.912104 -> 0.912104 
 204 M M 0.378571 0.598539 0.022890 -> 0.598539 
 205 M B 0.958890 0.035192 0.005919 -> 0.958890 
 206 R E 0.007258 0.266475 0.726267 -> 0.726267 
 207 S E 0.029358 0.336896 0.633747 -> 0.633747 
 208 L B 0.720934 0.266898 0.012168 -> 0.720934 
 209 A B 0.729940 0.248217 0.021844 -> 0.729940 
 210 A E 0.069185 0.273786 0.657029 -> 0.657029 
 211 G M 0.371273 0.483425 0.145301 -> 0.483425 
 212 I B 0.877808 0.085943 0.036249 -> 0.877808 
 213 M M 0.320289 0.529745 0.149965 -> 0.529745 
 214 L E 0.081655 0.255443 0.662903 -> 0.662903 
 215 M M 0.315761 0.591757 0.092482 -> 0.591757 
 216 Q M 0.294215 0.545029 0.160756 -> 0.545029 
 217 V E 0.113538 0.359227 0.527235 -> 0.527235 
 218 K E 0.006307 0.099682 0.894012 -> 0.894012 
 219 D E 0.044599 0.357255 0.598146 -> 0.598146 
 220 T E 0.029291 0.197219 0.773490 -> 0.773490 
 221 S E 0.033961 0.236461 0.729578 -> 0.729578 
 222 S M 0.143823 0.466904 0.389273 -> 0.466904 
 223 P M 0.351057 0.398836 0.250107 -> 0.398836 
 224 V B 0.495658 0.385573 0.118769 -> 0.495658 
 225 N E 0.209891 0.294716 0.495393 -> 0.495393 
 226 G E 0.148591 0.314230 0.537179 -> 0.537179 
 227 A E 0.106359 0.236176 0.657465 -> 0.657465 
 228 F M 0.326792 0.424361 0.248846 -> 0.424361 
 229 L M 0.363544 0.510374 0.126082 -> 0.510374 
 230 S E 0.273938 0.320395 0.405667 -> 0.405667 
 231 W B 0.677107 0.276602 0.046291 -> 0.677107 
 232 Q B 0.543735 0.327310 0.128955 -> 0.543735 
 233 N B 0.682490 0.230118 0.087392 -> 0.682490 
 234 L B 0.888969 0.096586 0.014445 -> 0.888969 
 235 W B 0.909431 0.082127 0.008442 -> 0.909431 
 236 H B 0.883456 0.103695 0.012849 -> 0.883456 
 237 G B 0.888820 0.087267 0.023913 -> 0.888820 
 238 Y B 0.845115 0.145074 0.009811 -> 0.845115 
 239 G B 0.921681 0.070260 0.008058 -> 0.921681 
 240 N B 0.931730 0.064687 0.003583 -> 0.931730 
 241 S B 0.886465 0.108315 0.005220 -> 0.886465 
 242 Q B 0.982554 0.015881 0.001564 -> 0.982554 
 243 A B 0.991570 0.008245 0.000185 -> 0.991570 
 244 Y B 0.576782 0.413427 0.009791 -> 0.576782 
 245 A B 0.990145 0.008296 0.001560 -> 0.990145 
 246 L B 0.984558 0.014907 0.000536 -> 0.984558 
 247 L B 0.868622 0.124026 0.007352 -> 0.868622 
 248 V M 0.315847 0.669657 0.014496 -> 0.669657 
 249 A B 0.966465 0.029205 0.004330 -> 0.966465 
 250 G B 0.761874 0.226904 0.011222 -> 0.761874 
 251 N M 0.070338 0.534681 0.394981 -> 0.534681 
 252 R M 0.189423 0.585472 0.225105 -> 0.585472 
 253 L M 0.448283 0.513388 0.038329 -> 0.513388 
 254 G E 0.008117 0.118985 0.872898 -> 0.872898 
 255 D M 0.037496 0.802840 0.159664 -> 0.802840 
 256 R E 0.001958 0.072048 0.925994 -> 0.925994 
 257 D E 0.005821 0.159832 0.834346 -> 0.834346 
 258 M B 0.786237 0.191551 0.022212 -> 0.786237 
 259 I B 0.530074 0.453655 0.016271 -> 0.530074 
 260 K E 0.007087 0.194185 0.798728 -> 0.798728 
 261 A M 0.258061 0.662710 0.079228 -> 0.662710 
 262 A B 0.992783 0.005889 0.001327 -> 0.992783 
 263 F M 0.231127 0.732282 0.036590 -> 0.732282 
 264 N E 0.006536 0.282234 0.711230 -> 0.711230 
 265 E B 0.690734 0.292419 0.016847 -> 0.690734 
 266 L B 0.984556 0.013483 0.001961 -> 0.984556 
 267 D E 0.016189 0.457387 0.526424 -> 0.526424 
 268 H E 0.022143 0.477935 0.499922 -> 0.499922 
 269 F B 0.974316 0.022174 0.003510 -> 0.974316 
 270 H M 0.464193 0.517077 0.018730 -> 0.517077 
 271 P E 0.004940 0.092546 0.902514 -> 0.902514 
 272 W M 0.174967 0.716056 0.108977 -> 0.716056 
 273 L B 0.937458 0.060203 0.002338 -> 0.937458 
 274 I M 0.182874 0.647088 0.170038 -> 0.647088 
 275 S E 0.021712 0.193335 0.784954 -> 0.784954 
 276 N E 0.018236 0.123971 0.857793 -> 0.857793 
 277 G E 0.081248 0.213295 0.705457 -> 0.705457 
 278 L M 0.207300 0.557880 0.234820 -> 0.557880 
 279 L B 0.675951 0.276211 0.047838 -> 0.675951 
 280 N M 0.379333 0.474293 0.146375 -> 0.474293 
 281 E M 0.270573 0.417645 0.311781 -> 0.417645 
 282 F B 0.657000 0.303066 0.039935 -> 0.657000 
 283 T B 0.590547 0.322147 0.087306 -> 0.590547 
 284 V B 0.733714 0.247987 0.018298 -> 0.733714 
 285 R M 0.112430 0.535385 0.352185 -> 0.535385 
 286 Q E 0.052137 0.302552 0.645310 -> 0.645310 
 287 Q E 0.054252 0.358338 0.587410 -> 0.587410 
 288 G E 0.238435 0.311732 0.449834 -> 0.449834 
 289 E E 0.026890 0.207314 0.765796 -> 0.765796 
 290 K E 0.022586 0.229841 0.747573 -> 0.747573 
 291 V M 0.349652 0.429595 0.220753 -> 0.429595 
 292 T E 0.088447 0.267325 0.644228 -> 0.644228 
 293 L E 0.155141 0.375986 0.468873 -> 0.468873 
 294 I M 0.252670 0.409032 0.338298 -> 0.409032 
 295 E E 0.028074 0.234658 0.737268 -> 0.737268 
 296 Q E 0.058741 0.416437 0.524822 -> 0.524822 
 297 K E 0.048942 0.339941 0.611117 -> 0.611117 
 298 K E 0.050168 0.406175 0.543657 -> 0.543657 
 299 F B 0.817173 0.163012 0.019815 -> 0.817173 
 300 S B 0.492027 0.426383 0.081590 -> 0.492027 
 301 Q B 0.699140 0.186607 0.114253 -> 0.699140 
 302 I B 0.864118 0.122997 0.012885 -> 0.864118 
 303 A B 0.958287 0.037018 0.004696 -> 0.958287 
 304 Y B 0.560419 0.384037 0.055544 -> 0.560419 
 305 I B 0.783846 0.192110 0.024044 -> 0.783846 
 306 I B 0.940932 0.057366 0.001702 -> 0.940932 
 307 R B 0.679692 0.302904 0.017403 -> 0.679692 
 308 P B 0.926622 0.061154 0.012225 -> 0.926622 
 309 M B 0.991510 0.007410 0.001080 -> 0.991510 
 310 V B 0.988307 0.011253 0.000439 -> 0.988307 
 311 F B 0.541516 0.435528 0.022956 -> 0.541516 
 312 A B 0.962186 0.033164 0.004650 -> 0.962186 
 313 N B 0.959827 0.039448 0.000725 -> 0.959827 
 314 I B 0.829806 0.162403 0.007792 -> 0.829806 
 315 K M 0.178916 0.714334 0.106750 -> 0.714334 
 316 A B 0.982566 0.011612 0.005821 -> 0.982566 
 317 W B 0.578763 0.412459 0.008778 -> 0.578763 
 318 E M 0.026465 0.494868 0.478667 -> 0.494868 
 319 I M 0.397452 0.484859 0.117690 -> 0.484859 
 320 S B 0.546521 0.422462 0.031017 -> 0.546521 
 321 R E 0.004010 0.180788 0.815202 -> 0.815202 
 322 D M 0.025089 0.614474 0.360437 -> 0.614474 
 323 A E 0.007054 0.071745 0.921201 -> 0.921201 
 324 V M 0.067934 0.596612 0.335454 -> 0.596612 
 325 Y B 0.890547 0.096398 0.013055 -> 0.890547 
 326 L M 0.248582 0.715992 0.035426 -> 0.715992 
 327 E E 0.016217 0.220350 0.763433 -> 0.763433 
 328 R M 0.178311 0.754771 0.066917 -> 0.754771 
 329 A B 0.992576 0.006043 0.001381 -> 0.992576 
 330 V M 0.358976 0.581780 0.059245 -> 0.581780 
 331 D M 0.164909 0.646139 0.188953 -> 0.646139 
 332 L B 0.980317 0.017128 0.002555 -> 0.980317 
 333 S B 0.925040 0.071097 0.003862 -> 0.925040 
 334 L M 0.236510 0.579604 0.183886 -> 0.579604 
 335 W B 0.604785 0.333495 0.061720 -> 0.604785 
 336 F B 0.863290 0.119352 0.017357 -> 0.863290 
 337 F M 0.379207 0.521808 0.098986 -> 0.521808 
 338 K E 0.037329 0.203871 0.758800 -> 0.758800 
 339 N E 0.034266 0.469911 0.495823 -> 0.495823 
 340 N B 0.725282 0.247804 0.026914 -> 0.725282 
 341 P E 0.048746 0.316435 0.634819 -> 0.634819 
 342 A E 0.233596 0.340943 0.425461 -> 0.425461 
 343 Q E 0.015297 0.176719 0.807984 -> 0.807984 
 344 A B 0.610008 0.347086 0.042906 -> 0.610008 
 345 Q M 0.186955 0.605989 0.207056 -> 0.605989 
 346 M B 0.872207 0.108039 0.019754 -> 0.872207 
 347 Y M 0.335612 0.593706 0.070682 -> 0.593706 
 348 Y M 0.293814 0.631508 0.074678 -> 0.631508 
 349 P E 0.132183 0.419897 0.447919 -> 0.447919 
 350 V E 0.004631 0.146372 0.848997 -> 0.848997 
 351 T E 0.017847 0.166143 0.816010 -> 0.816010 
 352 G B 0.431256 0.407033 0.161711 -> 0.431256 
 353 I M 0.302250 0.425137 0.272614 -> 0.425137 
 354 A B 0.668865 0.246142 0.084993 -> 0.668865 
 355 F B 0.522369 0.427210 0.050421 -> 0.522369 
 356 D B 0.819167 0.150653 0.030180 -> 0.819167 
 357 G B 0.794739 0.183487 0.021774 -> 0.794739 
 358 I B 0.847363 0.144502 0.008136 -> 0.847363 
 359 D B 0.501602 0.430927 0.067471 -> 0.501602 
 360 S M 0.173407 0.442262 0.384331 -> 0.442262 
 361 A E 0.066095 0.238744 0.695161 -> 0.695161 
 362 T E 0.097946 0.429661 0.472393 -> 0.472393 
 363 T E 0.095516 0.444582 0.459902 -> 0.459902 
 364 V M 0.344046 0.411404 0.244550 -> 0.411404 
 365 N B 0.551268 0.380495 0.068237 -> 0.551268 
 366 K E 0.019738 0.424621 0.555641 -> 0.555641 
 367 N B 0.413194 0.354721 0.232085 -> 0.413194 
 368 S B 0.574645 0.346350 0.079005 -> 0.574645 
 369 G B 0.728225 0.223657 0.048118 -> 0.728225 
 370 A B 0.878928 0.109915 0.011157 -> 0.878928 
 371 E B 0.795304 0.185608 0.019088 -> 0.795304 
 372 S B 0.910087 0.077287 0.012626 -> 0.910087 
 373 T B 0.953586 0.040108 0.006306 -> 0.953586 
 374 I B 0.982678 0.016494 0.000828 -> 0.982678 
 375 E B 0.840383 0.144925 0.014692 -> 0.840383 
 376 A B 0.866118 0.124871 0.009010 -> 0.866118 
 377 L B 0.993124 0.006092 0.000784 -> 0.993124 
 378 L B 0.921829 0.071544 0.006627 -> 0.921829 
 379 T B 0.851816 0.121456 0.026728 -> 0.851816 
 380 L B 0.774103 0.208299 0.017598 -> 0.774103 
 381 Q B 0.630092 0.317014 0.052894 -> 0.630092 
 382 L M 0.423848 0.549263 0.026889 -> 0.549263 
 383 I B 0.765431 0.212509 0.022061 -> 0.765431 
 384 E E 0.016310 0.282203 0.701488 -> 0.701488 
 385 S E 0.028856 0.235095 0.736049 -> 0.736049 
 386 I M 0.353165 0.595499 0.051336 -> 0.595499 
 387 P E 0.011306 0.127620 0.861073 -> 0.861073 
 388 D E 0.010866 0.138162 0.850973 -> 0.850973 
 389 A B 0.671820 0.294557 0.033623 -> 0.671820 
 390 K M 0.033729 0.484983 0.481288 -> 0.484983 
 391 R E 0.004123 0.091798 0.904079 -> 0.904079 
 392 M M 0.132815 0.555697 0.311488 -> 0.555697 
 393 L B 0.614402 0.345018 0.040580 -> 0.614402 
 394 E E 0.037812 0.336808 0.625380 -> 0.625380 
 395 S E 0.041266 0.236802 0.721932 -> 0.721932 
 396 A M 0.394707 0.464144 0.141148 -> 0.464144 
 397 L M 0.237451 0.583174 0.179375 -> 0.583174 
 398 E E 0.012321 0.215979 0.771700 -> 0.771700 
 399 K E 0.003969 0.149070 0.846961 -> 0.846961 
 400 R E 0.028937 0.411700 0.559363 -> 0.559363 
 401 N E 0.016301 0.186903 0.796795 -> 0.796795 
 402 I E 0.054624 0.330959 0.614417 -> 0.614417 
 403 K E 0.002128 0.065876 0.931996 -> 0.931996 
 404 Q E 0.000559 0.021443 0.977999 -> 0.977999 
