# Supplementary material for: AcconPred: Predicting Solvent Accessibility and Contact Number Simultaneously by a Multitask Learning Framework under the Conditional Neural Fields Model
Source: Biomed Res Int. 2015 Aug 3;2015:678764. doi: 10.1155/2015/678764 (PMC4538422; doi:10.1155/2015/678764)
Supplement: Supplementary file 1 — Training/testing dataset as well as the CASP11 evaluation dataset could be found in the Supplementary Material. The CASP11 evaluation dataset contains all detailed results from SPINE-X, SANN, ACCpro5 and AcconPred. [file 678764.f1.zip › Supplmentary_Files/105_casp11_domain/casp11_domain_AcconPred/T0836-D1.reso]

# AcconPred: three-state solvent accessibility prediction results 
# probabilities are in the order of B (Bury, pACC: 0-10), M (Medium, pACC: 11-40) and E (Exposed, pACC: 41-100), 
# where pACC is the relative solvent accessibility value calculated by DSSP 
# output format: <position> <one letter amino acid> <predicted label> ... <probabilities> ... -> <maximal probability> 

 1 M E 0.003661 0.026016 0.970323 -> 0.970323 
 2 T E 0.016435 0.140586 0.842979 -> 0.842979 
 3 G E 0.048844 0.250494 0.700662 -> 0.700662 
 4 L E 0.135414 0.366818 0.497768 -> 0.497768 
 5 L M 0.354334 0.455918 0.189748 -> 0.455918 
 6 S E 0.063335 0.285203 0.651462 -> 0.651462 
 7 N M 0.086864 0.457115 0.456021 -> 0.457115 
 8 F B 0.561100 0.319213 0.119687 -> 0.561100 
 9 R M 0.095969 0.515344 0.388686 -> 0.515344 
 10 N M 0.313002 0.522669 0.164329 -> 0.522669 
 11 T B 0.674466 0.271193 0.054341 -> 0.674466 
 12 I B 0.848500 0.114284 0.037217 -> 0.848500 
 13 I B 0.777480 0.184299 0.038222 -> 0.777480 
 14 V B 0.810779 0.159045 0.030176 -> 0.810779 
 15 S B 0.777175 0.203425 0.019400 -> 0.777175 
 16 F B 0.941841 0.050622 0.007537 -> 0.941841 
 17 V B 0.941624 0.051097 0.007279 -> 0.941624 
 18 L B 0.933336 0.056002 0.010662 -> 0.933336 
 19 A B 0.960970 0.033935 0.005095 -> 0.960970 
 20 L B 0.978853 0.016877 0.004270 -> 0.978853 
 21 V B 0.967944 0.027809 0.004247 -> 0.967944 
 22 I B 0.965109 0.028002 0.006889 -> 0.965109 
 23 V B 0.947785 0.037882 0.014333 -> 0.947785 
 24 I B 0.830516 0.135060 0.034424 -> 0.830516 
 25 G B 0.845402 0.133292 0.021306 -> 0.845402 
 26 Y M 0.448445 0.465064 0.086491 -> 0.465064 
 27 G B 0.404596 0.319594 0.275810 -> 0.404596 
 28 H E 0.134161 0.388972 0.476866 -> 0.476866 
 29 S M 0.226708 0.416704 0.356589 -> 0.416704 
 30 P E 0.197054 0.313177 0.489768 -> 0.489768 
 31 H E 0.133664 0.358742 0.507594 -> 0.507594 
 32 G E 0.333210 0.274356 0.392434 -> 0.392434 
 33 H M 0.341133 0.437285 0.221582 -> 0.437285 
 34 D B 0.649971 0.227755 0.122274 -> 0.649971 
 35 A B 0.647838 0.249666 0.102495 -> 0.647838 
 36 T B 0.599302 0.302353 0.098345 -> 0.599302 
 37 Y B 0.909876 0.077717 0.012407 -> 0.909876 
 38 F B 0.950764 0.044800 0.004437 -> 0.950764 
 39 Q B 0.545881 0.410903 0.043216 -> 0.545881 
 40 A B 0.935517 0.051748 0.012735 -> 0.935517 
 41 I B 0.983158 0.013518 0.003324 -> 0.983158 
 42 F B 0.940152 0.055327 0.004522 -> 0.940152 
 43 R B 0.599174 0.365013 0.035814 -> 0.599174 
 44 W B 0.853411 0.139105 0.007484 -> 0.853411 
 45 L B 0.972325 0.023786 0.003889 -> 0.972325 
 46 H B 0.646906 0.327197 0.025897 -> 0.646906 
 47 V B 0.921808 0.065298 0.012893 -> 0.921808 
 48 L B 0.950595 0.042934 0.006471 -> 0.950595 
 49 F B 0.892885 0.094386 0.012729 -> 0.892885 
 50 G B 0.949937 0.040348 0.009714 -> 0.949937 
 51 I B 0.937304 0.055593 0.007103 -> 0.937304 
 52 L B 0.811740 0.169995 0.018265 -> 0.811740 
 53 W B 0.788459 0.194713 0.016827 -> 0.788459 
 54 I B 0.878993 0.101485 0.019522 -> 0.878993 
 55 G B 0.851039 0.124591 0.024370 -> 0.851039 
 56 L B 0.799632 0.172129 0.028240 -> 0.799632 
 57 L B 0.797272 0.183014 0.019714 -> 0.797272 
 58 Y B 0.834941 0.151137 0.013922 -> 0.834941 
 59 Y B 0.797195 0.190328 0.012478 -> 0.797195 
 60 F B 0.888431 0.097499 0.014070 -> 0.888431 
 61 N B 0.814008 0.153809 0.032183 -> 0.814008 
 62 F B 0.847161 0.126937 0.025902 -> 0.847161 
 63 V B 0.813337 0.152647 0.034016 -> 0.813337 
 64 Q M 0.391888 0.469883 0.138229 -> 0.469883 
 65 I B 0.482613 0.424382 0.093005 -> 0.482613 
 66 R E 0.042806 0.353428 0.603766 -> 0.603766 
 67 V B 0.441912 0.371989 0.186099 -> 0.441912 
 68 M M 0.275835 0.580950 0.143215 -> 0.580950 
 69 P E 0.077055 0.264909 0.658036 -> 0.658036 
 70 Q E 0.007769 0.095496 0.896735 -> 0.896735 
 71 I M 0.422061 0.505411 0.072529 -> 0.505411 
 72 P E 0.018904 0.268747 0.712349 -> 0.712349 
 73 A E 0.019785 0.125875 0.854340 -> 0.854340 
 74 E E 0.006780 0.082033 0.911188 -> 0.911188 
 75 L M 0.422433 0.472146 0.105421 -> 0.472146 
 76 K M 0.099618 0.457454 0.442929 -> 0.457454 
 77 P E 0.046377 0.267811 0.685812 -> 0.685812 
 78 A E 0.082412 0.299618 0.617970 -> 0.617970 
 79 V B 0.473260 0.372025 0.154714 -> 0.473260 
 80 S M 0.329305 0.397942 0.272752 -> 0.397942 
 81 K E 0.009908 0.202595 0.787498 -> 0.787498 
 82 Y E 0.033482 0.242974 0.723544 -> 0.723544 
 83 I M 0.100351 0.458767 0.440881 -> 0.458767 
 84 A B 0.759113 0.185368 0.055519 -> 0.759113 
 85 P M 0.230678 0.497531 0.271791 -> 0.497531 
 86 E E 0.032573 0.280874 0.686554 -> 0.686554 
 87 A B 0.495176 0.353427 0.151397 -> 0.495176 
 88 L B 0.664056 0.252229 0.083715 -> 0.664056 
 89 F B 0.648835 0.291622 0.059543 -> 0.648835 
 90 W B 0.692014 0.243952 0.064034 -> 0.692014 
 91 F B 0.847710 0.122414 0.029876 -> 0.847710 
 92 R B 0.592003 0.376343 0.031654 -> 0.592003 
 93 W B 0.907140 0.082783 0.010077 -> 0.907140 
 94 A B 0.768090 0.206567 0.025343 -> 0.768090 
 95 A B 0.947016 0.041769 0.011214 -> 0.947016 
 96 L B 0.929652 0.061049 0.009300 -> 0.929652 
 97 A B 0.918268 0.072178 0.009554 -> 0.918268 
 98 T B 0.788767 0.196692 0.014541 -> 0.788767 
 99 W B 0.929944 0.065667 0.004389 -> 0.929944 
 100 V B 0.980999 0.017133 0.001868 -> 0.980999 
 101 M B 0.832243 0.156721 0.011035 -> 0.832243 
 102 G B 0.941353 0.051012 0.007635 -> 0.941353 
 103 V B 0.983669 0.013788 0.002543 -> 0.983669 
 104 L B 0.956795 0.038160 0.005045 -> 0.956795 
 105 L B 0.943115 0.045266 0.011619 -> 0.943115 
 106 A B 0.955409 0.026426 0.018165 -> 0.955409 
 107 Y B 0.840109 0.135893 0.023997 -> 0.840109 
 108 N B 0.870670 0.114403 0.014928 -> 0.870670 
 109 R B 0.673143 0.304065 0.022792 -> 0.673143 
 110 G B 0.633733 0.321392 0.044875 -> 0.633733 
 111 Y B 0.580451 0.388408 0.031141 -> 0.580451 
 112 L B 0.912731 0.064017 0.023252 -> 0.912731 
 113 V B 0.677851 0.284390 0.037758 -> 0.677851 
 114 E B 0.665253 0.274493 0.060254 -> 0.665253 
 115 A B 0.942185 0.041196 0.016619 -> 0.942185 
 116 F B 0.939479 0.055020 0.005502 -> 0.939479 
 117 T B 0.842297 0.146709 0.010994 -> 0.842297 
 118 L B 0.893046 0.092762 0.014192 -> 0.893046 
 119 G B 0.775952 0.196436 0.027612 -> 0.775952 
 120 L B 0.674051 0.261837 0.064112 -> 0.674051 
 121 A B 0.560217 0.257956 0.181827 -> 0.560217 
 122 G B 0.403838 0.328157 0.268005 -> 0.403838 
 123 G B 0.533684 0.250562 0.215754 -> 0.533684 
 124 Y M 0.354186 0.438138 0.207675 -> 0.438138 
 125 T B 0.521893 0.300965 0.177141 -> 0.521893 
 126 P M 0.340488 0.360613 0.298899 -> 0.360613 
 127 G B 0.501160 0.294988 0.203852 -> 0.501160 
 128 V B 0.566107 0.303219 0.130674 -> 0.566107 
 129 D M 0.348302 0.422107 0.229591 -> 0.422107 
 130 M B 0.434739 0.397867 0.167394 -> 0.434739 
 131 G B 0.709475 0.223983 0.066542 -> 0.709475 
 132 F B 0.762158 0.181822 0.056020 -> 0.762158 
 133 T B 0.702875 0.238014 0.059111 -> 0.702875 
 134 F B 0.774495 0.190407 0.035098 -> 0.774495 
 135 I B 0.843709 0.118470 0.037821 -> 0.843709 
 136 G B 0.805707 0.179592 0.014701 -> 0.805707 
 137 T B 0.898893 0.086158 0.014949 -> 0.898893 
 138 G B 0.830108 0.145083 0.024809 -> 0.830108 
 139 M B 0.863611 0.120944 0.015445 -> 0.863611 
 140 W B 0.902683 0.093618 0.003698 -> 0.902683 
 141 L B 0.909431 0.080318 0.010251 -> 0.909431 
 142 A B 0.902237 0.075785 0.021978 -> 0.902237 
 143 T B 0.920847 0.069035 0.010117 -> 0.920847 
 144 V B 0.926202 0.063107 0.010691 -> 0.926202 
 145 M B 0.818517 0.133558 0.047925 -> 0.818517 
 146 F B 0.808179 0.161254 0.030567 -> 0.808179 
 147 F B 0.828562 0.148170 0.023269 -> 0.828562 
 148 N B 0.767106 0.211506 0.021388 -> 0.767106 
 149 V B 0.921549 0.064788 0.013664 -> 0.921549 
 150 W B 0.808685 0.169261 0.022054 -> 0.808685 
 151 V B 0.893853 0.091541 0.014606 -> 0.893853 
 152 F B 0.916969 0.062138 0.020893 -> 0.916969 
 153 I B 0.962794 0.029432 0.007774 -> 0.962794 
 154 W B 0.765900 0.203680 0.030420 -> 0.765900 
 155 P B 0.458686 0.408353 0.132961 -> 0.458686 
 156 N B 0.572603 0.342573 0.084824 -> 0.572603 
 157 Q B 0.749449 0.217460 0.033092 -> 0.749449 
 158 K E 0.077584 0.419671 0.502745 -> 0.502745 
 159 I M 0.245538 0.584633 0.169829 -> 0.584633 
 160 A B 0.847062 0.127970 0.024968 -> 0.847062 
 161 L B 0.589436 0.356324 0.054240 -> 0.589436 
 162 G E 0.227427 0.371105 0.401468 -> 0.401468 
 163 I M 0.345058 0.510896 0.144046 -> 0.510896 
 164 V B 0.517764 0.392329 0.089907 -> 0.517764 
 165 E E 0.016456 0.212446 0.771098 -> 0.771098 
 166 A E 0.117902 0.399001 0.483097 -> 0.483097 
 167 D E 0.011782 0.128073 0.860145 -> 0.860145 
 168 A E 0.047988 0.350277 0.601735 -> 0.601735 
 169 D E 0.014354 0.119816 0.865830 -> 0.865830 
 170 A E 0.079456 0.302433 0.618110 -> 0.618110 
 171 K E 0.015742 0.243204 0.741054 -> 0.741054 
 172 A E 0.180617 0.318617 0.500766 -> 0.500766 
 173 K E 0.010389 0.144077 0.845534 -> 0.845534 
 174 A M 0.322999 0.369010 0.307991 -> 0.369010 
 175 A B 0.371872 0.326613 0.301515 -> 0.371872 
 176 K E 0.054135 0.306743 0.639121 -> 0.639121 
 177 T M 0.172907 0.524343 0.302750 -> 0.524343 
 178 A B 0.542411 0.200949 0.256640 -> 0.542411 
 179 M M 0.215846 0.449858 0.334296 -> 0.449858 
 180 L B 0.479624 0.325827 0.194549 -> 0.479624 
 181 V B 0.589776 0.300454 0.109770 -> 0.589776 
 182 S B 0.650895 0.226515 0.122590 -> 0.650895 
 183 R M 0.278317 0.500240 0.221443 -> 0.500240 
 184 T B 0.634005 0.248977 0.117017 -> 0.634005 
 185 N B 0.527853 0.326825 0.145322 -> 0.527853 
 186 T B 0.567112 0.311060 0.121828 -> 0.567112 
 187 L B 0.639992 0.308642 0.051366 -> 0.639992 
 188 L B 0.856050 0.115991 0.027958 -> 0.856050 
 189 S B 0.815932 0.161663 0.022405 -> 0.815932 
 190 I B 0.929379 0.059917 0.010703 -> 0.929379 
 191 P B 0.882628 0.108646 0.008726 -> 0.882628 
 192 M B 0.977447 0.019280 0.003273 -> 0.977447 
 193 L B 0.985977 0.011812 0.002211 -> 0.985977 
 194 A B 0.949084 0.047859 0.003057 -> 0.949084 
 195 T B 0.911141 0.077530 0.011329 -> 0.911141 
 196 M B 0.891668 0.093701 0.014632 -> 0.891668 
 197 A B 0.795580 0.179450 0.024970 -> 0.795580 
 198 M B 0.532316 0.404919 0.062765 -> 0.532316 
 199 H M 0.272908 0.480477 0.246615 -> 0.480477 
 200 Q M 0.153501 0.433232 0.413267 -> 0.433232 
 201 T E 0.099602 0.359734 0.540663 -> 0.540663 
 202 L E 0.176575 0.338706 0.484720 -> 0.484720 
 203 F M 0.208635 0.403391 0.387974 -> 0.403391 
 204 G E 0.011384 0.062063 0.926553 -> 0.926553 
