# Supplementary material for: AcconPred: Predicting Solvent Accessibility and Contact Number Simultaneously by a Multitask Learning Framework under the Conditional Neural Fields Model
Source: Biomed Res Int. 2015 Aug 3;2015:678764. doi: 10.1155/2015/678764 (PMC4538422; doi:10.1155/2015/678764)
Supplement: Supplementary file 1 — Training/testing dataset as well as the CASP11 evaluation dataset could be found in the Supplementary Material. The CASP11 evaluation dataset contains all detailed results from SPINE-X, SANN, ACCpro5 and AcconPred. [file 678764.f1.zip › Supplmentary_Files/105_casp11_domain/casp11_domain_AcconPred/T0837-D1.reso]

# AcconPred: three-state solvent accessibility prediction results 
# probabilities are in the order of B (Bury, pACC: 0-10), M (Medium, pACC: 11-40) and E (Exposed, pACC: 41-100), 
# where pACC is the relative solvent accessibility value calculated by DSSP 
# output format: <position> <one letter amino acid> <predicted label> ... <probabilities> ... -> <maximal probability> 

 1 S E 0.002450 0.024277 0.973272 -> 0.973272 
 2 D E 0.011653 0.133998 0.854349 -> 0.854349 
 3 T E 0.066211 0.302345 0.631443 -> 0.631443 
 4 R E 0.053038 0.438664 0.508299 -> 0.508299 
 5 K E 0.006471 0.262792 0.730737 -> 0.730737 
 6 A B 0.700595 0.238113 0.061292 -> 0.700595 
 7 I B 0.616864 0.335476 0.047661 -> 0.616864 
 8 D E 0.019761 0.260481 0.719759 -> 0.719759 
 9 T M 0.159511 0.616416 0.224073 -> 0.616416 
 10 I B 0.969985 0.025156 0.004860 -> 0.969985 
 11 S M 0.328225 0.550120 0.121655 -> 0.550120 
 12 N E 0.003768 0.087962 0.908270 -> 0.908270 
 13 L M 0.164399 0.644279 0.191323 -> 0.644279 
 14 L B 0.559501 0.422534 0.017965 -> 0.559501 
 15 K E 0.002456 0.087698 0.909846 -> 0.909846 
 16 I M 0.468547 0.473371 0.058082 -> 0.473371 
 17 K E 0.002861 0.103374 0.893765 -> 0.893765 
 18 P M 0.229957 0.480424 0.289618 -> 0.480424 
 19 I B 0.468463 0.465176 0.066360 -> 0.468463 
 20 Y M 0.142204 0.611244 0.246551 -> 0.611244 
 21 I B 0.716110 0.242284 0.041607 -> 0.716110 
 22 E M 0.136642 0.484865 0.378493 -> 0.484865 
 23 S M 0.157453 0.522736 0.319812 -> 0.522736 
 24 M B 0.734145 0.225185 0.040670 -> 0.734145 
 25 L B 0.576010 0.372887 0.051103 -> 0.576010 
 26 Q E 0.015047 0.183034 0.801919 -> 0.801919 
 27 E E 0.016901 0.243119 0.739980 -> 0.739980 
 28 M B 0.425686 0.408902 0.165412 -> 0.425686 
 29 G M 0.371905 0.480722 0.147373 -> 0.480722 
 30 P E 0.020113 0.217675 0.762212 -> 0.762212 
 31 R E 0.007988 0.133745 0.858267 -> 0.858267 
 32 Q M 0.259943 0.538734 0.201323 -> 0.538734 
 33 T B 0.653787 0.260757 0.085456 -> 0.653787 
 34 Q E 0.040921 0.364479 0.594599 -> 0.594599 
 35 M M 0.137960 0.527197 0.334843 -> 0.527197 
 36 F B 0.790628 0.173153 0.036220 -> 0.790628 
 37 I B 0.544967 0.400559 0.054474 -> 0.544967 
 38 R E 0.022612 0.340791 0.636597 -> 0.636597 
 39 S M 0.363960 0.515464 0.120576 -> 0.515464 
 40 T B 0.626343 0.299157 0.074500 -> 0.626343 
 41 S E 0.061655 0.282434 0.655911 -> 0.655911 
 42 N E 0.011743 0.144802 0.843455 -> 0.843455 
 43 G E 0.064061 0.318522 0.617418 -> 0.617418 
 44 S E 0.057368 0.363877 0.578755 -> 0.578755 
 45 A E 0.118348 0.422772 0.458880 -> 0.458880 
 46 E E 0.011637 0.106189 0.882174 -> 0.882174 
 47 E M 0.165367 0.667097 0.167536 -> 0.667097 
 48 V B 0.920799 0.071437 0.007764 -> 0.920799 
 49 R M 0.100952 0.628199 0.270850 -> 0.628199 
 50 K M 0.060357 0.478050 0.461593 -> 0.478050 
 51 A B 0.892637 0.087354 0.020008 -> 0.892637 
 52 A B 0.956573 0.030921 0.012506 -> 0.956573 
 53 Y M 0.469127 0.471445 0.059428 -> 0.471445 
 54 L B 0.934865 0.034179 0.030955 -> 0.934865 
 55 V B 0.934146 0.051184 0.014670 -> 0.934146 
 56 F B 0.956890 0.032924 0.010186 -> 0.956890 
 57 I B 0.977055 0.014682 0.008264 -> 0.977055 
 58 Y B 0.771287 0.201798 0.026915 -> 0.771287 
 59 H B 0.716228 0.247772 0.036000 -> 0.716228 
 60 T B 0.705786 0.254403 0.039811 -> 0.705786 
 61 F B 0.735940 0.234902 0.029157 -> 0.735940 
 62 I B 0.511582 0.417907 0.070511 -> 0.511582 
 63 K E 0.052477 0.413030 0.534493 -> 0.534493 
 64 N M 0.130899 0.485124 0.383977 -> 0.485124 
 65 P E 0.084890 0.375247 0.539863 -> 0.539863 
 66 S E 0.033336 0.368557 0.598107 -> 0.598107 
 67 D E 0.031086 0.301144 0.667769 -> 0.667769 
 68 E E 0.008319 0.102257 0.889424 -> 0.889424 
 69 N M 0.294633 0.561327 0.144039 -> 0.561327 
 70 V B 0.733794 0.214484 0.051723 -> 0.733794 
 71 E E 0.031172 0.354441 0.614387 -> 0.614387 
 72 L M 0.160915 0.629457 0.209629 -> 0.629457 
 73 W B 0.900372 0.088042 0.011586 -> 0.900372 
 74 R M 0.241977 0.661075 0.096948 -> 0.661075 
 75 N E 0.053812 0.339639 0.606549 -> 0.606549 
 76 T B 0.583341 0.376815 0.039844 -> 0.583341 
 77 L B 0.947216 0.042179 0.010605 -> 0.947216 
 78 I M 0.117043 0.582033 0.300924 -> 0.582033 
 79 R E 0.003872 0.138796 0.857332 -> 0.857332 
 80 A M 0.194858 0.470840 0.334302 -> 0.470840 
 81 Q E 0.014793 0.212073 0.773134 -> 0.773134 
 82 I B 0.627053 0.346569 0.026378 -> 0.627053 
 83 S E 0.075960 0.312390 0.611650 -> 0.611650 
 84 P E 0.090115 0.294464 0.615421 -> 0.615421 
 85 I E 0.036621 0.253883 0.709496 -> 0.709496 
 86 L B 0.561711 0.358796 0.079494 -> 0.561711 
 87 A M 0.135043 0.479403 0.385554 -> 0.479403 
 88 A E 0.035080 0.216396 0.748524 -> 0.748524 
 89 E E 0.044655 0.289349 0.665997 -> 0.665997 
 90 H M 0.400065 0.526726 0.073208 -> 0.526726 
 91 T B 0.764027 0.199077 0.036896 -> 0.764027 
 92 D M 0.264957 0.542091 0.192952 -> 0.542091 
 93 A B 0.703704 0.221026 0.075270 -> 0.703704 
 94 A B 0.952498 0.037650 0.009852 -> 0.952498 
 95 L B 0.786628 0.188559 0.024813 -> 0.786628 
 96 F M 0.352974 0.460901 0.186124 -> 0.460901 
 97 Y B 0.529187 0.433012 0.037801 -> 0.529187 
 98 F B 0.789417 0.188555 0.022028 -> 0.789417 
 99 A M 0.241432 0.451907 0.306661 -> 0.451907 
 100 E E 0.032883 0.294326 0.672791 -> 0.672791 
 101 L M 0.449437 0.450760 0.099803 -> 0.450760 
 102 D E 0.084770 0.417671 0.497559 -> 0.497559 
 103 L M 0.266804 0.498284 0.234911 -> 0.498284 
 104 D E 0.034161 0.358882 0.606957 -> 0.606957 
 105 A M 0.227078 0.416612 0.356310 -> 0.416612 
 106 F E 0.081105 0.352785 0.566110 -> 0.566110 
 107 E M 0.251005 0.521063 0.227932 -> 0.521063 
 108 L B 0.625081 0.295767 0.079152 -> 0.625081 
 109 A M 0.269608 0.452995 0.277397 -> 0.452995 
 110 Q E 0.095098 0.448118 0.456784 -> 0.456784 
 111 F B 0.820200 0.150390 0.029410 -> 0.820200 
 112 R M 0.254428 0.642857 0.102715 -> 0.642857 
 113 R E 0.018122 0.215596 0.766282 -> 0.766282 
 114 H M 0.106695 0.577987 0.315318 -> 0.577987 
 115 Y B 0.642989 0.323700 0.033311 -> 0.642989 
 116 N M 0.117863 0.466069 0.416069 -> 0.466069 
 117 L E 0.029226 0.144100 0.826674 -> 0.826674 
 118 H E 0.025541 0.265748 0.708710 -> 0.708710 
 119 F M 0.383400 0.431937 0.184663 -> 0.431937 
 120 N E 0.024642 0.239639 0.735719 -> 0.735719 
 121 P E 0.006067 0.045256 0.948677 -> 0.948677 
