# Supplementary material for: AcconPred: Predicting Solvent Accessibility and Contact Number Simultaneously by a Multitask Learning Framework under the Conditional Neural Fields Model
Source: Biomed Res Int. 2015 Aug 3;2015:678764. doi: 10.1155/2015/678764 (PMC4538422; doi:10.1155/2015/678764)
Supplement: Supplementary file 1 — Training/testing dataset as well as the CASP11 evaluation dataset could be found in the Supplementary Material. The CASP11 evaluation dataset contains all detailed results from SPINE-X, SANN, ACCpro5 and AcconPred. [file 678764.f1.zip › Supplmentary_Files/105_casp11_domain/casp11_domain_AcconPred/T0838-D1.reso]

# AcconPred: three-state solvent accessibility prediction results 
# probabilities are in the order of B (Bury, pACC: 0-10), M (Medium, pACC: 11-40) and E (Exposed, pACC: 41-100), 
# where pACC is the relative solvent accessibility value calculated by DSSP 
# output format: <position> <one letter amino acid> <predicted label> ... <probabilities> ... -> <maximal probability> 

 1 T E 0.004579 0.032381 0.963040 -> 0.963040 
 2 A E 0.013839 0.155688 0.830474 -> 0.830474 
 3 Y M 0.092815 0.521638 0.385546 -> 0.521638 
 4 G E 0.116558 0.275979 0.607463 -> 0.607463 
 5 L B 0.526803 0.421366 0.051831 -> 0.526803 
 6 T E 0.030560 0.402752 0.566688 -> 0.566688 
 7 F B 0.647325 0.333622 0.019053 -> 0.647325 
 8 E E 0.010672 0.231072 0.758256 -> 0.758256 
 9 A B 0.561941 0.361047 0.077012 -> 0.561941 
 10 P E 0.116075 0.426742 0.457183 -> 0.457183 
 11 K E 0.006436 0.089092 0.904472 -> 0.904472 
 12 G E 0.039690 0.176245 0.784066 -> 0.784066 
 13 I M 0.471913 0.486322 0.041765 -> 0.486322 
 14 L M 0.074651 0.497817 0.427532 -> 0.497817 
 15 V M 0.362064 0.531424 0.106512 -> 0.531424 
 16 E E 0.035728 0.397185 0.567087 -> 0.567087 
 17 E E 0.014209 0.223122 0.762668 -> 0.762668 
 18 D E 0.038601 0.349297 0.612102 -> 0.612102 
 19 T E 0.088713 0.389576 0.521712 -> 0.521712 
 20 E E 0.008948 0.113358 0.877694 -> 0.877694 
 21 E E 0.043566 0.374200 0.582234 -> 0.582234 
 22 T M 0.368041 0.428005 0.203954 -> 0.428005 
 23 F M 0.444824 0.467737 0.087439 -> 0.467737 
 24 L B 0.611678 0.319075 0.069247 -> 0.611678 
 25 L B 0.592843 0.337716 0.069441 -> 0.592843 
 26 N M 0.231953 0.387635 0.380412 -> 0.387635 
 27 N M 0.145514 0.473847 0.380639 -> 0.473847 
 28 S E 0.140107 0.387196 0.472697 -> 0.472697 
 29 R M 0.068476 0.554125 0.377398 -> 0.554125 
 30 F B 0.761619 0.219734 0.018646 -> 0.761619 
 31 Y M 0.357937 0.568419 0.073644 -> 0.568419 
 32 I B 0.961511 0.034505 0.003985 -> 0.961511 
 33 T B 0.585974 0.355393 0.058633 -> 0.585974 
 34 I B 0.933650 0.061597 0.004752 -> 0.933650 
 35 Q M 0.249356 0.621699 0.128946 -> 0.621699 
 36 S B 0.562789 0.356703 0.080508 -> 0.562789 
 37 L B 0.497459 0.442125 0.060416 -> 0.497459 
 38 D E 0.059955 0.380522 0.559523 -> 0.559523 
 39 S E 0.085883 0.384880 0.529236 -> 0.529236 
 40 D E 0.011161 0.098610 0.890229 -> 0.890229 
 41 G E 0.079189 0.274935 0.645877 -> 0.645877 
 42 M M 0.462231 0.489945 0.047824 -> 0.489945 
 43 T E 0.018305 0.218030 0.763665 -> 0.763665 
 44 K E 0.021828 0.354669 0.623503 -> 0.623503 
 45 S E 0.015903 0.174750 0.809347 -> 0.809347 
 46 D E 0.017082 0.293226 0.689691 -> 0.689691 
 47 L B 0.760088 0.218903 0.021009 -> 0.760088 
 48 K E 0.015862 0.383309 0.600829 -> 0.600829 
 49 S E 0.016618 0.227292 0.756090 -> 0.756090 
 50 V M 0.265992 0.620465 0.113544 -> 0.620465 
 51 L B 0.904550 0.086147 0.009303 -> 0.904550 
 52 K E 0.003808 0.190553 0.805640 -> 0.805640 
 53 D E 0.009286 0.139604 0.851110 -> 0.851110 
 54 Y M 0.371198 0.586781 0.042021 -> 0.586781 
 55 A M 0.392354 0.407348 0.200299 -> 0.407348 
 56 N E 0.022001 0.192677 0.785322 -> 0.785322 
 57 D E 0.021761 0.267182 0.711057 -> 0.711057 
 58 D E 0.006459 0.123402 0.870140 -> 0.870140 
 59 G E 0.029604 0.217397 0.752999 -> 0.752999 
 60 V M 0.305058 0.536349 0.158593 -> 0.536349 
 61 K E 0.003949 0.134182 0.861870 -> 0.861870 
 62 D E 0.007570 0.107266 0.885164 -> 0.885164 
 63 Q E 0.032351 0.310304 0.657345 -> 0.657345 
 64 S E 0.058943 0.391022 0.550035 -> 0.550035 
 65 A E 0.050458 0.293678 0.655864 -> 0.655864 
 66 V M 0.334637 0.500264 0.165099 -> 0.500264 
 67 Q E 0.021411 0.412201 0.566387 -> 0.566387 
 68 E E 0.005633 0.160982 0.833384 -> 0.833384 
 69 F B 0.533146 0.447106 0.019749 -> 0.533146 
 70 E E 0.019539 0.296714 0.683747 -> 0.683747 
 71 L B 0.647226 0.317995 0.034778 -> 0.647226 
 72 P M 0.168983 0.470298 0.360718 -> 0.470298 
 73 Q E 0.108621 0.402556 0.488822 -> 0.488822 
 74 F B 0.615032 0.314116 0.070852 -> 0.615032 
 75 F M 0.312565 0.497987 0.189448 -> 0.497987 
 76 G B 0.497834 0.280149 0.222017 -> 0.497834 
 77 T B 0.568101 0.343838 0.088061 -> 0.568101 
 78 Y M 0.064933 0.557483 0.377584 -> 0.557483 
 79 L B 0.683136 0.281681 0.035183 -> 0.683136 
 80 K E 0.009223 0.206793 0.783984 -> 0.783984 
 81 G E 0.152247 0.400664 0.447089 -> 0.447089 
 82 S E 0.052733 0.332169 0.615098 -> 0.615098 
 83 C M 0.404845 0.507364 0.087791 -> 0.507364 
 84 E E 0.014695 0.193682 0.791623 -> 0.791623 
 85 T E 0.045250 0.289468 0.665282 -> 0.665282 
 86 D E 0.094798 0.360319 0.544882 -> 0.544882 
 87 H M 0.122469 0.511295 0.366235 -> 0.511295 
 88 C B 0.771479 0.199531 0.028990 -> 0.771479 
 89 L B 0.768685 0.203026 0.028288 -> 0.768685 
 90 Y B 0.595051 0.351974 0.052975 -> 0.595051 
 91 A B 0.936321 0.056968 0.006711 -> 0.936321 
 92 C B 0.838468 0.148024 0.013509 -> 0.838468 
 93 L B 0.871688 0.119207 0.009104 -> 0.871688 
 94 M B 0.889824 0.099170 0.011006 -> 0.889824 
 95 T B 0.636689 0.297786 0.065526 -> 0.636689 
 96 K E 0.062393 0.369802 0.567806 -> 0.567806 
 97 A E 0.160706 0.343028 0.496266 -> 0.496266 
 98 A E 0.089562 0.246860 0.663579 -> 0.663579 
 99 G E 0.148901 0.347113 0.503987 -> 0.503987 
 100 S B 0.442966 0.405565 0.151469 -> 0.442966 
 101 G B 0.660487 0.270420 0.069093 -> 0.660487 
 102 F B 0.920025 0.072489 0.007486 -> 0.920025 
 103 Y M 0.421123 0.525844 0.053033 -> 0.525844 
 104 I B 0.932459 0.062920 0.004621 -> 0.932459 
 105 S B 0.756771 0.215278 0.027951 -> 0.756771 
 106 I B 0.943836 0.050003 0.006161 -> 0.943836 
 107 I B 0.742586 0.236066 0.021348 -> 0.742586 
 108 Y B 0.576703 0.367337 0.055960 -> 0.576703 
 109 S M 0.288796 0.587977 0.123226 -> 0.587977 
 110 K E 0.008575 0.191854 0.799571 -> 0.799571 
 111 E E 0.009133 0.147744 0.843123 -> 0.843123 
 112 N E 0.134905 0.392742 0.472353 -> 0.472353 
 113 E E 0.032021 0.305884 0.662094 -> 0.662094 
 114 N E 0.014552 0.163195 0.822253 -> 0.822253 
 115 I M 0.195558 0.635716 0.168726 -> 0.635716 
 116 A B 0.524661 0.338026 0.137313 -> 0.524661 
 117 E E 0.015869 0.296537 0.687594 -> 0.687594 
 118 K E 0.003398 0.173947 0.822655 -> 0.822655 
 119 I B 0.676090 0.298929 0.024981 -> 0.676090 
 120 L B 0.606753 0.340619 0.052629 -> 0.606753 
 121 K E 0.002160 0.096309 0.901531 -> 0.901531 
 122 S E 0.055725 0.351520 0.592755 -> 0.592755 
 123 F B 0.533176 0.400601 0.066223 -> 0.533176 
 124 T E 0.016172 0.223060 0.760768 -> 0.760768 
 125 M E 0.077267 0.400528 0.522206 -> 0.522206 
 126 E E 0.003869 0.056227 0.939903 -> 0.939903 
