# Supplementary material for: AcconPred: Predicting Solvent Accessibility and Contact Number Simultaneously by a Multitask Learning Framework under the Conditional Neural Fields Model
Source: Biomed Res Int. 2015 Aug 3;2015:678764. doi: 10.1155/2015/678764 (PMC4538422; doi:10.1155/2015/678764)
Supplement: Supplementary file 1 — Training/testing dataset as well as the CASP11 evaluation dataset could be found in the Supplementary Material. The CASP11 evaluation dataset contains all detailed results from SPINE-X, SANN, ACCpro5 and AcconPred. [file 678764.f1.zip › Supplmentary_Files/105_casp11_domain/casp11_domain_AcconPred/T0840-D1.reso]

# AcconPred: three-state solvent accessibility prediction results 
# probabilities are in the order of B (Bury, pACC: 0-10), M (Medium, pACC: 11-40) and E (Exposed, pACC: 41-100), 
# where pACC is the relative solvent accessibility value calculated by DSSP 
# output format: <position> <one letter amino acid> <predicted label> ... <probabilities> ... -> <maximal probability> 

 1 V E 0.053571 0.141571 0.804858 -> 0.804858 
 2 P E 0.044806 0.296497 0.658696 -> 0.658696 
 3 S E 0.026371 0.219184 0.754445 -> 0.754445 
 4 F B 0.505614 0.473470 0.020916 -> 0.505614 
 5 S E 0.026570 0.240194 0.733237 -> 0.733237 
 6 A M 0.166039 0.433744 0.400217 -> 0.433744 
 7 G E 0.005130 0.060755 0.934114 -> 0.934114 
 8 G E 0.084855 0.415516 0.499630 -> 0.499630 
 9 L E 0.055862 0.401914 0.542224 -> 0.542224 
 10 V B 0.562613 0.374437 0.062949 -> 0.562613 
 11 Q M 0.271805 0.549505 0.178690 -> 0.549505 
 12 A B 0.669723 0.273979 0.056298 -> 0.669723 
 13 M B 0.845404 0.142959 0.011637 -> 0.845404 
 14 V B 0.738527 0.238875 0.022598 -> 0.738527 
 15 T B 0.678826 0.291260 0.029914 -> 0.678826 
 16 Y B 0.821652 0.169132 0.009217 -> 0.821652 
 17 E M 0.212773 0.602025 0.185202 -> 0.602025 
 18 G B 0.572575 0.319504 0.107921 -> 0.572575 
 19 D M 0.439045 0.487756 0.073199 -> 0.487756 
 20 R E 0.017319 0.147018 0.835662 -> 0.835662 
 21 N E 0.009699 0.188283 0.802018 -> 0.802018 
 22 E E 0.054673 0.430657 0.514670 -> 0.514670 
 23 S M 0.098751 0.537325 0.363924 -> 0.537325 
 24 A M 0.388509 0.586372 0.025119 -> 0.586372 
 25 V B 0.972833 0.023993 0.003174 -> 0.972833 
 26 F B 0.829991 0.168128 0.001881 -> 0.829991 
 27 V B 0.979768 0.018737 0.001495 -> 0.979768 
 28 A B 0.930644 0.058896 0.010460 -> 0.930644 
 29 I B 0.967066 0.029508 0.003425 -> 0.967066 
 30 R M 0.203028 0.690086 0.106886 -> 0.690086 
 31 N B 0.495043 0.377269 0.127688 -> 0.495043 
 32 R M 0.352061 0.578241 0.069698 -> 0.578241 
 33 L B 0.953712 0.042846 0.003442 -> 0.953712 
 34 H B 0.675603 0.275543 0.048855 -> 0.675603 
 35 V M 0.373527 0.489903 0.136569 -> 0.489903 
 36 L B 0.861168 0.127858 0.010974 -> 0.861168 
 37 G M 0.353688 0.572238 0.074074 -> 0.572238 
 38 P E 0.054221 0.368509 0.577270 -> 0.577270 
 39 D E 0.009178 0.157493 0.833329 -> 0.833329 
 40 L B 0.743673 0.236257 0.020071 -> 0.743673 
 41 K E 0.008115 0.163901 0.827985 -> 0.827985 
 42 S E 0.033142 0.253376 0.713481 -> 0.713481 
 43 V M 0.171160 0.561042 0.267798 -> 0.561042 
 44 Q E 0.011199 0.240530 0.748272 -> 0.748272 
 45 S E 0.039372 0.277340 0.683289 -> 0.683289 
 46 L M 0.162738 0.538112 0.299151 -> 0.538112 
 47 A E 0.103323 0.360160 0.536517 -> 0.536517 
 48 T E 0.096263 0.347573 0.556163 -> 0.556163 
 49 G M 0.178084 0.442096 0.379820 -> 0.442096 
 50 P M 0.181528 0.443597 0.374875 -> 0.443597 
 51 A E 0.026424 0.203000 0.770576 -> 0.770576 
 52 G E 0.013518 0.082881 0.903600 -> 0.903600 
 53 D M 0.183364 0.560418 0.256218 -> 0.560418 
 54 P E 0.023824 0.122113 0.854062 -> 0.854062 
 55 G E 0.020186 0.117530 0.862284 -> 0.862284 
 56 C M 0.276788 0.496795 0.226417 -> 0.496795 
 57 Q E 0.046962 0.340136 0.612902 -> 0.612902 
 58 T E 0.048240 0.240208 0.711552 -> 0.711552 
 59 C M 0.401952 0.472090 0.125959 -> 0.472090 
 60 A E 0.053223 0.224060 0.722717 -> 0.722717 
 61 A E 0.103155 0.344397 0.552447 -> 0.552447 
 62 C E 0.168617 0.372406 0.458976 -> 0.458976 
 63 G E 0.196819 0.398417 0.404764 -> 0.404764 
 64 P E 0.018201 0.115013 0.866786 -> 0.866786 
 65 G E 0.109775 0.371586 0.518639 -> 0.518639 
 66 P E 0.035119 0.175649 0.789232 -> 0.789232 
 67 H E 0.009902 0.118009 0.872090 -> 0.872090 
 68 G E 0.114497 0.391920 0.493583 -> 0.493583 
 69 P E 0.013991 0.188717 0.797292 -> 0.797292 
 70 P E 0.025072 0.232596 0.742332 -> 0.742332 
 71 G M 0.149092 0.520319 0.330589 -> 0.520319 
 72 D E 0.081542 0.436444 0.482014 -> 0.482014 
 73 T B 0.736433 0.230383 0.033184 -> 0.736433 
 74 D M 0.212726 0.672945 0.114329 -> 0.672945 
 75 T B 0.822257 0.144485 0.033258 -> 0.822257 
 76 K M 0.195819 0.730015 0.074167 -> 0.730015 
 77 V B 0.950562 0.048036 0.001402 -> 0.950562 
 78 L B 0.695018 0.296051 0.008931 -> 0.695018 
 79 V B 0.948005 0.048812 0.003183 -> 0.948005 
 80 L B 0.596274 0.383420 0.020306 -> 0.596274 
 81 D M 0.340249 0.596700 0.063051 -> 0.596700 
 82 P E 0.036984 0.301903 0.661113 -> 0.661113 
 83 A E 0.017931 0.146993 0.835076 -> 0.835076 
 84 L M 0.248203 0.609991 0.141805 -> 0.609991 
 85 P E 0.051158 0.369151 0.579691 -> 0.579691 
 86 A B 0.560775 0.406832 0.032393 -> 0.560775 
 87 L B 0.972600 0.025260 0.002140 -> 0.972600 
 88 V B 0.948123 0.050458 0.001419 -> 0.948123 
 89 S B 0.957284 0.039547 0.003169 -> 0.957284 
 90 C B 0.879450 0.117646 0.002904 -> 0.879450 
 91 G B 0.611443 0.316593 0.071964 -> 0.611443 
 92 S B 0.539950 0.350672 0.109378 -> 0.539950 
 93 S B 0.515337 0.311262 0.173401 -> 0.515337 
 94 L B 0.394938 0.375623 0.229439 -> 0.394938 
 95 Q M 0.382646 0.476452 0.140902 -> 0.476452 
 96 G B 0.627318 0.232511 0.140171 -> 0.627318 
 97 R M 0.070585 0.479645 0.449771 -> 0.479645 
 98 C B 0.442922 0.429927 0.127151 -> 0.442922 
 99 F M 0.140640 0.527051 0.332310 -> 0.527051 
 100 L E 0.040656 0.266930 0.692414 -> 0.692414 
 101 H M 0.288274 0.638221 0.073505 -> 0.638221 
 102 D E 0.042915 0.318041 0.639044 -> 0.639044 
 103 L B 0.828008 0.152401 0.019591 -> 0.828008 
 104 E E 0.027401 0.354448 0.618151 -> 0.618151 
 105 P E 0.047426 0.253535 0.699039 -> 0.699039 
 106 Q E 0.042988 0.221795 0.735217 -> 0.735217 
 107 G E 0.191483 0.395461 0.413055 -> 0.413055 
 108 T E 0.036016 0.256063 0.707920 -> 0.707920 
 109 A E 0.166199 0.358775 0.475025 -> 0.475025 
 110 V M 0.171325 0.470601 0.358074 -> 0.470601 
 111 H E 0.061086 0.408672 0.530242 -> 0.530242 
 112 L M 0.181017 0.517811 0.301172 -> 0.517811 
 113 A E 0.241769 0.349645 0.408587 -> 0.408587 
 114 A E 0.154153 0.304734 0.541113 -> 0.541113 
 115 P E 0.118397 0.263938 0.617666 -> 0.617666 
 116 A E 0.198774 0.336128 0.465098 -> 0.465098 
 117 C M 0.326600 0.405596 0.267805 -> 0.405596 
 118 L M 0.357010 0.431060 0.211930 -> 0.431060 
 119 F M 0.309586 0.400802 0.289612 -> 0.400802 
 120 S M 0.317324 0.383566 0.299110 -> 0.383566 
 121 A B 0.374783 0.291491 0.333726 -> 0.374783 
 122 H E 0.128294 0.374252 0.497454 -> 0.497454 
 123 H M 0.178014 0.486566 0.335421 -> 0.486566 
 124 N E 0.045187 0.225935 0.728878 -> 0.728878 
 125 R E 0.038526 0.405344 0.556130 -> 0.556130 
 126 P E 0.048544 0.199932 0.751524 -> 0.751524 
 127 D E 0.016914 0.102302 0.880785 -> 0.880785 
 128 D E 0.092544 0.430727 0.476729 -> 0.476729 
 129 C B 0.507344 0.391976 0.100680 -> 0.507344 
 130 P M 0.338368 0.338489 0.323143 -> 0.338489 
 131 D M 0.333866 0.458660 0.207474 -> 0.458660 
 132 C B 0.684026 0.284977 0.030998 -> 0.684026 
 133 V B 0.677325 0.258378 0.064297 -> 0.677325 
 134 A B 0.438281 0.343523 0.218196 -> 0.438281 
 135 S M 0.397732 0.418800 0.183468 -> 0.418800 
 136 P E 0.188724 0.323473 0.487803 -> 0.487803 
 137 L E 0.065580 0.349058 0.585362 -> 0.585362 
 138 G M 0.396955 0.434686 0.168359 -> 0.434686 
 139 T B 0.657420 0.288798 0.053782 -> 0.657420 
 140 R M 0.254475 0.590568 0.154957 -> 0.590568 
 141 V B 0.900529 0.097113 0.002358 -> 0.900529 
 142 T B 0.856212 0.131046 0.012741 -> 0.856212 
 143 V B 0.888367 0.103310 0.008323 -> 0.888367 
 144 V B 0.737672 0.237879 0.024449 -> 0.737672 
 145 E B 0.485461 0.405910 0.108629 -> 0.485461 
 146 Q E 0.082939 0.410195 0.506867 -> 0.506867 
 147 G M 0.207326 0.422484 0.370190 -> 0.422484 
 148 Q E 0.032451 0.282270 0.685279 -> 0.685279 
 149 A M 0.251888 0.418517 0.329595 -> 0.418517 
 150 S M 0.237469 0.460790 0.301741 -> 0.460790 
 151 Y M 0.362507 0.586701 0.050792 -> 0.586701 
 152 F B 0.878278 0.111774 0.009948 -> 0.878278 
 153 Y B 0.682525 0.301468 0.016007 -> 0.682525 
 154 V B 0.819908 0.166515 0.013577 -> 0.819908 
 155 A B 0.899109 0.092550 0.008342 -> 0.899109 
 156 S B 0.644223 0.311412 0.044365 -> 0.644223 
 157 S M 0.341419 0.496258 0.162323 -> 0.496258 
 158 L B 0.443054 0.431288 0.125658 -> 0.443054 
 159 D M 0.104666 0.461143 0.434191 -> 0.461143 
 160 A E 0.129127 0.297359 0.573514 -> 0.573514 
 161 A E 0.092177 0.265565 0.642258 -> 0.642258 
 162 V M 0.230013 0.448596 0.321392 -> 0.448596 
 163 A E 0.053557 0.234614 0.711829 -> 0.711829 
 164 G E 0.103545 0.360241 0.536214 -> 0.536214 
 165 S E 0.051187 0.257794 0.691018 -> 0.691018 
 166 F M 0.308934 0.448474 0.242593 -> 0.448474 
 167 S M 0.268630 0.442836 0.288534 -> 0.442836 
 168 P E 0.142768 0.410874 0.446358 -> 0.446358 
 169 R E 0.061893 0.362615 0.575492 -> 0.575492 
 170 S M 0.287028 0.377928 0.335044 -> 0.377928 
 171 V B 0.419274 0.409324 0.171402 -> 0.419274 
 172 S B 0.636218 0.280478 0.083304 -> 0.636218 
 173 I M 0.364163 0.436761 0.199076 -> 0.436761 
 174 R M 0.137872 0.484355 0.377773 -> 0.484355 
 175 R E 0.016687 0.257483 0.725830 -> 0.725830 
 176 L B 0.543174 0.414660 0.042166 -> 0.543174 
 177 K E 0.009615 0.141183 0.849202 -> 0.849202 
 178 A E 0.120207 0.373993 0.505800 -> 0.505800 
 179 D E 0.021498 0.214667 0.763835 -> 0.763835 
 180 A E 0.124921 0.360278 0.514801 -> 0.514801 
 181 S E 0.034579 0.148969 0.816452 -> 0.816452 
 182 G E 0.114454 0.287999 0.597548 -> 0.597548 
 183 F M 0.334853 0.419162 0.245985 -> 0.419162 
 184 A E 0.155569 0.418711 0.425720 -> 0.425720 
 185 P E 0.129280 0.338245 0.532475 -> 0.532475 
 186 G E 0.130935 0.277143 0.591922 -> 0.591922 
 187 F B 0.574723 0.373763 0.051514 -> 0.574723 
 188 V B 0.429846 0.416044 0.154110 -> 0.429846 
 189 A B 0.489810 0.351497 0.158693 -> 0.489810 
 190 L B 0.608471 0.311046 0.080483 -> 0.608471 
 191 S M 0.264620 0.485949 0.249431 -> 0.485949 
 192 V M 0.305418 0.396061 0.298521 -> 0.396061 
 193 L M 0.405800 0.461578 0.132622 -> 0.461578 
 194 P M 0.259931 0.409714 0.330354 -> 0.409714 
 195 K E 0.022993 0.155673 0.821334 -> 0.821334 
 196 H E 0.140931 0.397560 0.461509 -> 0.461509 
 197 L M 0.326293 0.449251 0.224456 -> 0.449251 
 198 V M 0.191234 0.425082 0.383684 -> 0.425082 
 199 S E 0.015897 0.103178 0.880924 -> 0.880924 
 200 Y M 0.389249 0.485399 0.125352 -> 0.485399 
 201 S E 0.100810 0.437533 0.461657 -> 0.461657 
 202 I B 0.591141 0.348777 0.060082 -> 0.591141 
 203 E M 0.119549 0.603838 0.276613 -> 0.603838 
 204 Y B 0.592539 0.358219 0.049243 -> 0.592539 
 205 V B 0.678576 0.307855 0.013569 -> 0.678576 
 206 H B 0.605372 0.361834 0.032795 -> 0.605372 
 207 S B 0.871479 0.117918 0.010603 -> 0.871479 
 208 F B 0.873407 0.118724 0.007869 -> 0.873407 
 209 H M 0.049447 0.477338 0.473215 -> 0.477338 
 210 T M 0.169686 0.602251 0.228064 -> 0.602251 
 211 G E 0.047741 0.223449 0.728810 -> 0.728810 
 212 A M 0.084072 0.476796 0.439132 -> 0.476796 
 213 F M 0.461525 0.511310 0.027165 -> 0.511310 
 214 V B 0.930698 0.065695 0.003607 -> 0.930698 
 215 Y B 0.802104 0.189523 0.008373 -> 0.802104 
 216 F B 0.936899 0.056350 0.006751 -> 0.936899 
 217 L B 0.923879 0.070286 0.005835 -> 0.923879 
 218 T B 0.816559 0.160988 0.022453 -> 0.816559 
 219 V B 0.526099 0.429661 0.044240 -> 0.526099 
 220 Q B 0.675951 0.270681 0.053368 -> 0.675951 
 221 P E 0.076943 0.417530 0.505526 -> 0.505526 
 222 A E 0.078040 0.363146 0.558814 -> 0.558814 
 223 S E 0.075031 0.275691 0.649278 -> 0.649278 
 224 V E 0.112538 0.397740 0.489722 -> 0.489722 
 225 T E 0.039602 0.295480 0.664919 -> 0.664919 
 226 D E 0.009570 0.143128 0.847302 -> 0.847302 
 227 D E 0.051477 0.367365 0.581158 -> 0.581158 
 228 P E 0.019842 0.159311 0.820848 -> 0.820848 
 229 S E 0.019058 0.255206 0.725736 -> 0.725736 
 230 A M 0.409400 0.440968 0.149632 -> 0.440968 
 231 L B 0.472542 0.452981 0.074477 -> 0.472542 
 232 H B 0.528784 0.433455 0.037761 -> 0.528784 
 233 T B 0.906966 0.090715 0.002319 -> 0.906966 
 234 R M 0.467697 0.510206 0.022097 -> 0.510206 
 235 L B 0.971644 0.027089 0.001267 -> 0.971644 
 236 A B 0.945453 0.051285 0.003262 -> 0.945453 
 237 R B 0.600387 0.365641 0.033973 -> 0.600387 
 238 L B 0.919557 0.074554 0.005889 -> 0.919557 
 239 S B 0.801563 0.180268 0.018169 -> 0.801563 
 240 A M 0.141610 0.595828 0.262561 -> 0.595828 
 241 T E 0.031217 0.296132 0.672651 -> 0.672651 
 242 E M 0.419595 0.489682 0.090723 -> 0.489682 
 243 P E 0.019615 0.122347 0.858037 -> 0.858037 
 244 E E 0.017300 0.294847 0.687854 -> 0.687854 
 245 L M 0.400569 0.442565 0.156866 -> 0.442565 
 246 G M 0.307952 0.453135 0.238913 -> 0.453135 
 247 D B 0.526147 0.284975 0.188878 -> 0.526147 
 248 Y M 0.418850 0.492263 0.088887 -> 0.492263 
 249 R M 0.350870 0.507848 0.141281 -> 0.507848 
 250 E M 0.249909 0.525065 0.225026 -> 0.525065 
 251 L B 0.841972 0.146791 0.011237 -> 0.841972 
 252 V M 0.144799 0.680659 0.174543 -> 0.680659 
 253 L B 0.954570 0.041498 0.003932 -> 0.954570 
 254 D M 0.050227 0.516782 0.432992 -> 0.516782 
 255 C B 0.670584 0.307641 0.021775 -> 0.670584 
 256 R E 0.034940 0.439735 0.525325 -> 0.525325 
 257 F M 0.374721 0.421618 0.203662 -> 0.421618 
 258 A M 0.331075 0.400393 0.268532 -> 0.400393 
 259 P E 0.083614 0.257541 0.658844 -> 0.658844 
 260 K E 0.015224 0.127886 0.856890 -> 0.856890 
 261 L M 0.237979 0.538653 0.223369 -> 0.538653 
 262 V M 0.307375 0.491305 0.201319 -> 0.491305 
 263 P M 0.345648 0.367171 0.287181 -> 0.367171 
 264 R M 0.133724 0.437134 0.429142 -> 0.437134 
 265 G B 0.371142 0.322475 0.306384 -> 0.371142 
 266 S M 0.290040 0.457542 0.252418 -> 0.457542 
 267 P E 0.155349 0.370890 0.473761 -> 0.473761 
 268 E E 0.005960 0.097216 0.896824 -> 0.896824 
 269 G E 0.026611 0.276565 0.696824 -> 0.696824 
 270 G E 0.046922 0.226067 0.727011 -> 0.727011 
 271 Q M 0.075753 0.481466 0.442781 -> 0.481466 
 272 P E 0.062404 0.461370 0.476227 -> 0.476227 
 273 Y B 0.745616 0.237704 0.016679 -> 0.745616 
 274 P M 0.436518 0.460386 0.103097 -> 0.460386 
 275 V B 0.541270 0.412247 0.046483 -> 0.541270 
 276 L B 0.969811 0.026014 0.004176 -> 0.969811 
 277 Q B 0.656955 0.307937 0.035107 -> 0.656955 
 278 V B 0.957558 0.037349 0.005093 -> 0.957558 
 279 A B 0.878624 0.112124 0.009252 -> 0.878624 
 280 H B 0.590150 0.359251 0.050599 -> 0.590150 
 281 S B 0.612341 0.310238 0.077421 -> 0.612341 
 282 A B 0.807320 0.168492 0.024188 -> 0.807320 
 283 P M 0.191948 0.463891 0.344162 -> 0.463891 
 284 V B 0.502646 0.371398 0.125956 -> 0.502646 
 285 G B 0.522651 0.322359 0.154990 -> 0.522651 
 286 A E 0.146996 0.386221 0.466783 -> 0.466783 
 287 Q E 0.036085 0.293443 0.670472 -> 0.670472 
 288 L B 0.623511 0.333995 0.042493 -> 0.623511 
 289 A B 0.655769 0.271718 0.072514 -> 0.655769 
 290 T E 0.029916 0.221970 0.748114 -> 0.748114 
 291 E E 0.045445 0.319968 0.634588 -> 0.634588 
 292 L M 0.348999 0.500255 0.150747 -> 0.500255 
 293 S E 0.115417 0.348006 0.536577 -> 0.536577 
 294 I M 0.276857 0.524149 0.198994 -> 0.524149 
 295 A E 0.124215 0.360659 0.515126 -> 0.515126 
 296 E E 0.008331 0.105404 0.886265 -> 0.886265 
 297 G E 0.015487 0.095372 0.889142 -> 0.889142 
 298 Q M 0.027380 0.529976 0.442643 -> 0.529976 
 299 E E 0.053170 0.469676 0.477154 -> 0.477154 
 300 V B 0.679324 0.312456 0.008221 -> 0.679324 
 301 L B 0.976831 0.021772 0.001397 -> 0.976831 
 302 F B 0.935596 0.062631 0.001773 -> 0.935596 
 303 G B 0.985839 0.013244 0.000917 -> 0.985839 
 304 V B 0.965755 0.033249 0.000996 -> 0.965755 
 305 F B 0.948345 0.047028 0.004628 -> 0.948345 
 306 V B 0.789796 0.202947 0.007257 -> 0.789796 
 307 T M 0.261093 0.591329 0.147578 -> 0.591329 
 308 G M 0.366368 0.455863 0.177769 -> 0.455863 
 309 K E 0.009413 0.211481 0.779107 -> 0.779107 
 310 D E 0.020415 0.139299 0.840286 -> 0.840286 
 311 G E 0.135093 0.346331 0.518577 -> 0.518577 
 312 G E 0.148803 0.317852 0.533345 -> 0.533345 
 313 G M 0.249088 0.470700 0.280213 -> 0.470700 
 314 P E 0.058532 0.388360 0.553108 -> 0.553108 
 315 N M 0.043424 0.503484 0.453092 -> 0.503484 
 316 S B 0.770119 0.217451 0.012429 -> 0.770119 
 317 V B 0.870804 0.125540 0.003656 -> 0.870804 
 318 V B 0.953504 0.044630 0.001865 -> 0.953504 
 319 C B 0.984465 0.011839 0.003696 -> 0.984465 
 320 A B 0.867773 0.124198 0.008029 -> 0.867773 
 321 F B 0.847639 0.143963 0.008398 -> 0.847639 
 322 P M 0.316008 0.626023 0.057969 -> 0.626023 
 323 I B 0.673442 0.310466 0.016092 -> 0.673442 
 324 D E 0.005725 0.093521 0.900755 -> 0.900755 
 325 L M 0.083650 0.699211 0.217139 -> 0.699211 
 326 L B 0.980716 0.015097 0.004187 -> 0.980716 
 327 D M 0.081218 0.743088 0.175694 -> 0.743088 
 328 T E 0.013204 0.176045 0.810751 -> 0.810751 
 329 L M 0.228987 0.727239 0.043774 -> 0.727239 
 330 I B 0.855483 0.127639 0.016878 -> 0.855483 
 331 D E 0.008327 0.219664 0.772009 -> 0.772009 
 332 E E 0.004904 0.135453 0.859643 -> 0.859643 
 333 G B 0.644065 0.287498 0.068437 -> 0.644065 
 334 V B 0.507549 0.420610 0.071842 -> 0.507549 
 335 E E 0.022199 0.297627 0.680174 -> 0.680174 
 336 R E 0.024928 0.298249 0.676823 -> 0.676823 
 337 C B 0.551408 0.399253 0.049340 -> 0.551408 
 338 C M 0.411677 0.435355 0.152968 -> 0.435355 
 339 E E 0.022525 0.195364 0.782111 -> 0.782111 
 340 S E 0.130307 0.387126 0.482567 -> 0.482567 
 341 P E 0.037806 0.173927 0.788267 -> 0.788267 
 342 V E 0.135203 0.404644 0.460154 -> 0.460154 
 343 H E 0.095281 0.358172 0.546548 -> 0.546548 
 344 P E 0.052833 0.192159 0.755008 -> 0.755008 
 345 G E 0.102423 0.304912 0.592665 -> 0.592665 
 346 L M 0.197122 0.512127 0.290751 -> 0.512127 
 347 R E 0.042107 0.375120 0.582772 -> 0.582772 
 348 R E 0.037786 0.312802 0.649412 -> 0.649412 
 349 G E 0.154184 0.367291 0.478524 -> 0.478524 
 350 L M 0.256083 0.532361 0.211556 -> 0.532361 
 351 D M 0.226575 0.441532 0.331893 -> 0.441532 
 352 F M 0.170934 0.456667 0.372399 -> 0.456667 
 353 F M 0.346606 0.458490 0.194904 -> 0.458490 
 354 Q E 0.024699 0.188193 0.787108 -> 0.787108 
 355 S M 0.239798 0.446321 0.313881 -> 0.446321 
 356 P E 0.113763 0.290221 0.596016 -> 0.596016 
 357 S E 0.087656 0.288548 0.623796 -> 0.623796 
 358 F E 0.125359 0.410122 0.464519 -> 0.464519 
 359 C M 0.369953 0.464606 0.165441 -> 0.464606 
 360 P E 0.052835 0.247656 0.699509 -> 0.699509 
 361 N E 0.066614 0.260065 0.673321 -> 0.673321 
 362 P M 0.191880 0.441597 0.366523 -> 0.441597 
 363 P E 0.037966 0.183276 0.778757 -> 0.778757 
 364 G E 0.112229 0.284042 0.603729 -> 0.603729 
 365 L M 0.286578 0.537430 0.175992 -> 0.537430 
 366 E E 0.019821 0.193262 0.786917 -> 0.786917 
 367 A E 0.089936 0.264324 0.645739 -> 0.645739 
 368 L M 0.164698 0.431933 0.403369 -> 0.431933 
 369 S E 0.129307 0.348269 0.522424 -> 0.522424 
 370 P E 0.068675 0.266821 0.664504 -> 0.664504 
 371 N E 0.115453 0.290709 0.593839 -> 0.593839 
 372 T M 0.251640 0.407132 0.341228 -> 0.407132 
 373 S E 0.161349 0.285933 0.552718 -> 0.552718 
 374 C M 0.344213 0.411332 0.244455 -> 0.411332 
 375 R E 0.053136 0.332003 0.614861 -> 0.614861 
 376 H E 0.061033 0.315004 0.623964 -> 0.623964 
 377 F M 0.410083 0.484735 0.105182 -> 0.484735 
 378 P M 0.266638 0.375972 0.357389 -> 0.375972 
 379 L M 0.378134 0.387800 0.234067 -> 0.387800 
 380 L E 0.116191 0.360809 0.523000 -> 0.523000 
 381 V M 0.280360 0.375232 0.344408 -> 0.375232 
 382 S E 0.066503 0.265244 0.668253 -> 0.668253 
 383 S E 0.082679 0.294078 0.623243 -> 0.623243 
 384 S E 0.115091 0.301170 0.583740 -> 0.583740 
 385 F M 0.349831 0.497855 0.152314 -> 0.497855 
 386 S E 0.116466 0.358571 0.524963 -> 0.524963 
 387 R E 0.113116 0.391577 0.495307 -> 0.495307 
 388 V M 0.225718 0.533101 0.241181 -> 0.533101 
 389 D E 0.173024 0.320516 0.506461 -> 0.506461 
 390 L M 0.316158 0.458818 0.225024 -> 0.458818 
 391 F B 0.489842 0.344620 0.165538 -> 0.489842 
 392 N E 0.215662 0.376216 0.408121 -> 0.408121 
 393 G M 0.229410 0.393741 0.376849 -> 0.393741 
 394 L E 0.127115 0.372519 0.500366 -> 0.500366 
 395 L M 0.194568 0.463110 0.342322 -> 0.463110 
 396 G E 0.071119 0.293888 0.634992 -> 0.634992 
 397 P E 0.016650 0.214743 0.768608 -> 0.768608 
 398 V B 0.467320 0.428400 0.104281 -> 0.467320 
 399 Q M 0.107533 0.625707 0.266760 -> 0.625707 
 400 V B 0.897288 0.100750 0.001962 -> 0.897288 
 401 T B 0.745103 0.241378 0.013519 -> 0.745103 
 402 A B 0.850951 0.143778 0.005271 -> 0.850951 
 403 L B 0.947213 0.049639 0.003147 -> 0.947213 
 404 Y B 0.523174 0.436989 0.039837 -> 0.523174 
 405 V B 0.932934 0.061909 0.005157 -> 0.932934 
 406 T M 0.378978 0.533239 0.087783 -> 0.533239 
 407 R M 0.040964 0.519200 0.439836 -> 0.519200 
 408 L M 0.145112 0.562304 0.292584 -> 0.562304 
 409 D E 0.016395 0.206585 0.777020 -> 0.777020 
 410 N E 0.096741 0.439092 0.464168 -> 0.464168 
 411 V B 0.677151 0.303342 0.019507 -> 0.677151 
 412 T B 0.766681 0.222313 0.011006 -> 0.766681 
 413 V B 0.988863 0.010532 0.000605 -> 0.988863 
 414 A B 0.990442 0.009054 0.000504 -> 0.990442 
 415 H B 0.974162 0.024640 0.001198 -> 0.974162 
 416 M B 0.981952 0.016883 0.001165 -> 0.981952 
 417 G B 0.918983 0.075519 0.005498 -> 0.918983 
 418 T B 0.767272 0.214954 0.017774 -> 0.767272 
 419 M M 0.112375 0.521497 0.366128 -> 0.521497 
 420 D E 0.027167 0.326366 0.646466 -> 0.646466 
 421 G B 0.512892 0.367015 0.120094 -> 0.512892 
 422 R M 0.052452 0.628123 0.319426 -> 0.628123 
 423 I B 0.925624 0.069060 0.005316 -> 0.925624 
 424 L M 0.474776 0.501692 0.023532 -> 0.501692 
 425 Q B 0.520247 0.404675 0.075078 -> 0.520247 
 426 V B 0.936458 0.058986 0.004556 -> 0.936458 
 427 E M 0.370420 0.513732 0.115848 -> 0.513732 
 428 L B 0.691697 0.283731 0.024572 -> 0.691697 
 429 V M 0.263946 0.553961 0.182093 -> 0.553961 
 430 R E 0.053796 0.371905 0.574299 -> 0.574299 
 431 S E 0.088281 0.341173 0.570547 -> 0.570547 
 432 L E 0.175067 0.379469 0.445464 -> 0.445464 
 433 N E 0.084583 0.340244 0.575172 -> 0.575172 
 434 Y M 0.235968 0.447922 0.316110 -> 0.447922 
 435 L M 0.262665 0.475443 0.261892 -> 0.475443 
 436 L M 0.297805 0.428214 0.273981 -> 0.428214 
 437 Y M 0.100082 0.564750 0.335167 -> 0.564750 
 438 V M 0.370494 0.442115 0.187391 -> 0.442115 
 439 S E 0.149221 0.381289 0.469490 -> 0.469490 
 440 N E 0.058941 0.360137 0.580923 -> 0.580923 
 441 F M 0.380496 0.526691 0.092813 -> 0.526691 
 442 S E 0.046092 0.331092 0.622817 -> 0.622817 
 443 L M 0.267048 0.499999 0.232953 -> 0.499999 
 444 G E 0.050978 0.372796 0.576226 -> 0.576226 
 445 D E 0.014844 0.150992 0.834164 -> 0.834164 
 446 S E 0.008763 0.148433 0.842804 -> 0.842804 
 447 G E 0.021381 0.167425 0.811194 -> 0.811194 
 448 Q E 0.026997 0.307198 0.665805 -> 0.665805 
 449 P E 0.042522 0.346440 0.611037 -> 0.611037 
 450 V B 0.482732 0.436152 0.081116 -> 0.482732 
 451 Q E 0.035630 0.403667 0.560703 -> 0.560703 
 452 R M 0.073623 0.532065 0.394311 -> 0.532065 
 453 D E 0.065806 0.410936 0.523259 -> 0.523259 
 454 V B 0.498907 0.401015 0.100078 -> 0.498907 
 455 S M 0.336262 0.476532 0.187205 -> 0.476532 
 456 R E 0.023499 0.256920 0.719581 -> 0.719581 
 457 L E 0.034905 0.228681 0.736414 -> 0.736414 
 458 G E 0.029926 0.296301 0.673773 -> 0.673773 
 459 D E 0.018306 0.354848 0.626846 -> 0.626846 
 460 H M 0.279111 0.691077 0.029813 -> 0.691077 
 461 L B 0.964555 0.033528 0.001918 -> 0.964555 
 462 L B 0.901238 0.096499 0.002263 -> 0.901238 
 463 F B 0.982022 0.015751 0.002228 -> 0.982022 
 464 A B 0.917370 0.076951 0.005679 -> 0.917370 
 465 S B 0.787168 0.191427 0.021405 -> 0.787168 
 466 G E 0.075523 0.392727 0.531750 -> 0.531750 
 467 D E 0.027008 0.333413 0.639579 -> 0.639579 
 468 Q M 0.044196 0.488595 0.467208 -> 0.488595 
 469 V B 0.579227 0.394088 0.026684 -> 0.579227 
 470 F M 0.150909 0.661439 0.187652 -> 0.661439 
 471 Q E 0.042327 0.353400 0.604273 -> 0.604273 
 472 V B 0.728246 0.262532 0.009222 -> 0.728246 
 473 P E 0.011957 0.275923 0.712120 -> 0.712120 
 474 I B 0.598419 0.373271 0.028310 -> 0.598419 
 475 Q E 0.011387 0.209500 0.779113 -> 0.779113 
 476 G M 0.243317 0.537356 0.219327 -> 0.537356 
 477 P E 0.083237 0.328210 0.588553 -> 0.588553 
 478 G E 0.018508 0.187106 0.794385 -> 0.794385 
 479 C M 0.237074 0.667206 0.095719 -> 0.667206 
 480 R E 0.009747 0.125314 0.864939 -> 0.864939 
 481 H E 0.055013 0.348821 0.596166 -> 0.596166 
 482 F M 0.459314 0.481154 0.059532 -> 0.481154 
 483 L E 0.039310 0.256558 0.704132 -> 0.704132 
 484 T E 0.089588 0.440750 0.469662 -> 0.469662 
 485 C B 0.524013 0.438011 0.037975 -> 0.524013 
 486 G E 0.086498 0.371178 0.542324 -> 0.542324 
 487 R E 0.023295 0.211942 0.764763 -> 0.764763 
 488 C B 0.741147 0.239092 0.019760 -> 0.741147 
 489 L B 0.472521 0.416187 0.111293 -> 0.472521 
 490 R E 0.045836 0.345833 0.608332 -> 0.608332 
 491 A B 0.705915 0.222785 0.071300 -> 0.705915 
 492 W M 0.250156 0.568640 0.181204 -> 0.568640 
 493 H M 0.175156 0.447312 0.377532 -> 0.447312 
 494 F M 0.445648 0.452099 0.102252 -> 0.452099 
 495 M B 0.737168 0.197245 0.065587 -> 0.737168 
 496 G B 0.599175 0.338412 0.062413 -> 0.599175 
 497 C B 0.758895 0.212407 0.028698 -> 0.758895 
 498 G B 0.809168 0.167440 0.023392 -> 0.809168 
 499 W B 0.597847 0.361489 0.040664 -> 0.597847 
 500 C M 0.426633 0.471650 0.101717 -> 0.471650 
 501 G E 0.136025 0.427265 0.436710 -> 0.436710 
 502 N E 0.068499 0.305931 0.625570 -> 0.625570 
 503 M M 0.174724 0.510274 0.315003 -> 0.510274 
 504 C B 0.496561 0.438122 0.065317 -> 0.496561 
 505 G B 0.696319 0.261187 0.042494 -> 0.696319 
 506 Q E 0.044542 0.375166 0.580292 -> 0.580292 
 507 Q E 0.032169 0.456686 0.511145 -> 0.511145 
 508 K E 0.002396 0.067203 0.930401 -> 0.930401 
 509 E E 0.016914 0.195473 0.787613 -> 0.787613 
 510 C M 0.405361 0.536783 0.057856 -> 0.536783 
 511 P E 0.005918 0.091899 0.902184 -> 0.902184 
 512 G E 0.008630 0.104633 0.886737 -> 0.886737 
 513 S M 0.113420 0.479069 0.407511 -> 0.479069 
 514 W M 0.138981 0.491656 0.369363 -> 0.491656 
 515 Q E 0.048849 0.271781 0.679371 -> 0.679371 
 516 Q E 0.067190 0.281366 0.651444 -> 0.651444 
 517 D E 0.020964 0.202883 0.776153 -> 0.776153 
 518 H E 0.085859 0.436909 0.477232 -> 0.477232 
 519 C E 0.044543 0.298667 0.656790 -> 0.656790 
