# Supplementary material for: AcconPred: Predicting Solvent Accessibility and Contact Number Simultaneously by a Multitask Learning Framework under the Conditional Neural Fields Model
Source: Biomed Res Int. 2015 Aug 3;2015:678764. doi: 10.1155/2015/678764 (PMC4538422; doi:10.1155/2015/678764)
Supplement: Supplementary file 1 — Training/testing dataset as well as the CASP11 evaluation dataset could be found in the Supplementary Material. The CASP11 evaluation dataset contains all detailed results from SPINE-X, SANN, ACCpro5 and AcconPred. [file 678764.f1.zip › Supplmentary_Files/105_casp11_domain/casp11_domain_AcconPred/T0840-D2.reso]

# AcconPred: three-state solvent accessibility prediction results 
# probabilities are in the order of B (Bury, pACC: 0-10), M (Medium, pACC: 11-40) and E (Exposed, pACC: 41-100), 
# where pACC is the relative solvent accessibility value calculated by DSSP 
# output format: <position> <one letter amino acid> <predicted label> ... <probabilities> ... -> <maximal probability> 

 1 P E 0.000957 0.018666 0.980377 -> 0.980377 
 2 P M 0.108256 0.514418 0.377326 -> 0.514418 
 3 K E 0.005049 0.130149 0.864803 -> 0.864803 
 4 L M 0.430386 0.498125 0.071488 -> 0.498125 
 5 T M 0.073178 0.603849 0.322973 -> 0.603849 
 6 E E 0.011927 0.271637 0.716436 -> 0.716436 
 7 F B 0.562702 0.408312 0.028986 -> 0.562702 
 8 H M 0.047965 0.558379 0.393657 -> 0.558379 
 9 P B 0.596746 0.339303 0.063951 -> 0.596746 
 10 H E 0.015124 0.270410 0.714466 -> 0.714466 
 11 S E 0.018955 0.137200 0.843845 -> 0.843845 
 12 G M 0.181997 0.463713 0.354291 -> 0.463713 
 13 P E 0.060456 0.303896 0.635648 -> 0.635648 
 14 L E 0.084072 0.350673 0.565255 -> 0.565255 
 15 S E 0.052186 0.368853 0.578961 -> 0.578961 
 16 T B 0.586949 0.377343 0.035709 -> 0.586949 
 17 R M 0.040820 0.623172 0.336008 -> 0.623172 
 18 L B 0.933545 0.064037 0.002418 -> 0.933545 
 19 T B 0.579949 0.377228 0.042823 -> 0.579949 
 20 L B 0.984709 0.013643 0.001648 -> 0.984709 
 21 C M 0.462456 0.489395 0.048149 -> 0.489395 
 22 G B 0.678347 0.260619 0.061033 -> 0.678347 
 23 S M 0.104651 0.504769 0.390580 -> 0.504769 
 24 N M 0.167629 0.455466 0.376905 -> 0.455466 
 25 F B 0.803212 0.174510 0.022278 -> 0.803212 
 26 Y M 0.143352 0.440182 0.416466 -> 0.440182 
 27 L E 0.234819 0.373960 0.391221 -> 0.391221 
 28 H M 0.057253 0.499324 0.443423 -> 0.499324 
 29 P E 0.065382 0.333996 0.600622 -> 0.600622 
 30 E E 0.013838 0.101311 0.884851 -> 0.884851 
 31 G E 0.052535 0.302063 0.645401 -> 0.645401 
 32 T M 0.202260 0.490347 0.307394 -> 0.490347 
 33 H M 0.203705 0.636506 0.159789 -> 0.636506 
 34 Q M 0.054928 0.505614 0.439457 -> 0.505614 
 35 V B 0.946976 0.052102 0.000922 -> 0.946976 
 36 T M 0.168113 0.689015 0.142872 -> 0.689015 
 37 V B 0.913282 0.077944 0.008773 -> 0.913282 
 38 G B 0.498919 0.358695 0.142386 -> 0.498919 
 39 Q E 0.014586 0.128616 0.856798 -> 0.856798 
 40 S M 0.142542 0.609418 0.248039 -> 0.609418 
 41 P E 0.014947 0.183536 0.801517 -> 0.801517 
 42 C M 0.447026 0.530805 0.022169 -> 0.530805 
 43 R E 0.007282 0.178759 0.813959 -> 0.813959 
 44 P E 0.129162 0.304342 0.566496 -> 0.566496 
 45 L M 0.144920 0.629158 0.225922 -> 0.629158 
 46 P E 0.018581 0.144294 0.837125 -> 0.837125 
 47 F M 0.090965 0.479773 0.429262 -> 0.479773 
 48 V M 0.134055 0.545805 0.320140 -> 0.545805 
 49 E E 0.045005 0.389875 0.565120 -> 0.565120 
 50 E E 0.021177 0.450767 0.528056 -> 0.528056 
 51 F B 0.836613 0.153222 0.010165 -> 0.836613 
 52 E M 0.058189 0.621552 0.320259 -> 0.621552 
 53 C B 0.781887 0.208203 0.009910 -> 0.781887 
 54 E M 0.044169 0.571534 0.384297 -> 0.571534 
 55 L B 0.468999 0.464341 0.066660 -> 0.468999 
 56 E E 0.031577 0.374169 0.594255 -> 0.594255 
 57 P E 0.078423 0.282142 0.639435 -> 0.639435 
 58 L E 0.049822 0.344919 0.605259 -> 0.605259 
 59 G E 0.023417 0.143046 0.833536 -> 0.833536 
 60 T E 0.051441 0.401058 0.547501 -> 0.547501 
 61 P E 0.064583 0.291950 0.643467 -> 0.643467 
 62 T M 0.224971 0.580044 0.194986 -> 0.580044 
 63 N E 0.019440 0.233087 0.747473 -> 0.747473 
 64 V B 0.781238 0.214865 0.003897 -> 0.781238 
 65 S M 0.180256 0.548486 0.271259 -> 0.548486 
 66 L B 0.874393 0.122238 0.003369 -> 0.874393 
 67 T M 0.081519 0.685349 0.233131 -> 0.685349 
 68 V B 0.774066 0.218588 0.007346 -> 0.774066 
 69 T M 0.071315 0.553900 0.374785 -> 0.553900 
 70 N E 0.099827 0.389400 0.510773 -> 0.510773 
 71 M M 0.110623 0.480484 0.408893 -> 0.480484 
 72 P E 0.058428 0.264013 0.677559 -> 0.677559 
 73 P E 0.058776 0.251705 0.689519 -> 0.689519 
 74 G E 0.060152 0.240590 0.699258 -> 0.699258 
 75 K E 0.006850 0.156902 0.836248 -> 0.836248 
 76 H E 0.066817 0.454138 0.479045 -> 0.479045 
 77 F M 0.386902 0.515553 0.097544 -> 0.515553 
 78 R E 0.021730 0.328860 0.649410 -> 0.649410 
 79 V M 0.357501 0.525341 0.117158 -> 0.525341 
 80 D E 0.017534 0.227413 0.755053 -> 0.755053 
 81 G E 0.096605 0.333779 0.569616 -> 0.569616 
 82 T E 0.090141 0.426773 0.483086 -> 0.483086 
 83 S M 0.263490 0.438632 0.297878 -> 0.438632 
 84 V E 0.054382 0.305687 0.639931 -> 0.639931 
 85 L M 0.139662 0.524837 0.335501 -> 0.524837 
 86 R E 0.013291 0.241402 0.745307 -> 0.745307 
 87 G E 0.056475 0.212936 0.730589 -> 0.730589 
 88 F B 0.652032 0.288294 0.059674 -> 0.652032 
 89 S E 0.071389 0.430816 0.497795 -> 0.497795 
 90 F M 0.358848 0.471899 0.169254 -> 0.471899 
 91 M M 0.083839 0.502726 0.413435 -> 0.502726 
 92 E E 0.009952 0.072139 0.917908 -> 0.917908 
