# Supplementary material for: AcconPred: Predicting Solvent Accessibility and Contact Number Simultaneously by a Multitask Learning Framework under the Conditional Neural Fields Model
Source: Biomed Res Int. 2015 Aug 3;2015:678764. doi: 10.1155/2015/678764 (PMC4538422; doi:10.1155/2015/678764)
Supplement: Supplementary file 1 — Training/testing dataset as well as the CASP11 evaluation dataset could be found in the Supplementary Material. The CASP11 evaluation dataset contains all detailed results from SPINE-X, SANN, ACCpro5 and AcconPred. [file 678764.f1.zip › Supplmentary_Files/105_casp11_domain/casp11_domain_AcconPred/T0841-D1.reso]

# AcconPred: three-state solvent accessibility prediction results 
# probabilities are in the order of B (Bury, pACC: 0-10), M (Medium, pACC: 11-40) and E (Exposed, pACC: 41-100), 
# where pACC is the relative solvent accessibility value calculated by DSSP 
# output format: <position> <one letter amino acid> <predicted label> ... <probabilities> ... -> <maximal probability> 

 1 K E 0.001414 0.021791 0.976795 -> 0.976795 
 2 C M 0.079025 0.461585 0.459389 -> 0.461585 
 3 G E 0.063958 0.241526 0.694516 -> 0.694516 
 4 K E 0.009170 0.160360 0.830471 -> 0.830471 
 5 R E 0.030803 0.295782 0.673415 -> 0.673415 
 6 V M 0.106848 0.466949 0.426203 -> 0.466949 
 7 D E 0.025773 0.246306 0.727921 -> 0.727921 
 8 R E 0.035019 0.375250 0.589731 -> 0.589731 
 9 L B 0.510656 0.397401 0.091943 -> 0.510656 
 10 D E 0.060370 0.365207 0.574423 -> 0.574423 
 11 Q E 0.044608 0.312134 0.643258 -> 0.643258 
 12 R E 0.111901 0.402223 0.485875 -> 0.485875 
 13 R M 0.128556 0.552142 0.319301 -> 0.552142 
 14 S E 0.096593 0.302234 0.601173 -> 0.601173 
 15 K E 0.007059 0.165931 0.827010 -> 0.827010 
 16 L M 0.298723 0.429742 0.271535 -> 0.429742 
 17 R M 0.252226 0.511293 0.236481 -> 0.511293 
 18 V B 0.546295 0.366556 0.087149 -> 0.546295 
 19 V M 0.351629 0.473850 0.174521 -> 0.473850 
 20 G E 0.184671 0.397658 0.417671 -> 0.417671 
 21 G M 0.273512 0.451171 0.275317 -> 0.451171 
 22 H E 0.027804 0.393821 0.578374 -> 0.578374 
 23 P E 0.009750 0.078649 0.911601 -> 0.911601 
 24 G M 0.225651 0.451455 0.322894 -> 0.451455 
 25 N E 0.097161 0.354074 0.548765 -> 0.548765 
 26 S B 0.506047 0.418532 0.075421 -> 0.506047 
 27 P B 0.616594 0.302891 0.080514 -> 0.616594 
 28 W B 0.556500 0.398984 0.044516 -> 0.556500 
 29 T B 0.767798 0.211772 0.020430 -> 0.767798 
 30 V B 0.937401 0.060098 0.002501 -> 0.937401 
 31 S B 0.877892 0.115820 0.006288 -> 0.877892 
 32 L B 0.978202 0.020374 0.001425 -> 0.978202 
 33 R M 0.442878 0.516938 0.040184 -> 0.516938 
 34 N M 0.387323 0.558076 0.054602 -> 0.558076 
 35 R E 0.041796 0.470226 0.487978 -> 0.487978 
 36 Q E 0.007565 0.067408 0.925027 -> 0.925027 
 37 G E 0.045286 0.316648 0.638067 -> 0.638067 
 38 Q E 0.062166 0.438193 0.499641 -> 0.499641 
 39 H M 0.457625 0.471104 0.071271 -> 0.471104 
 40 F B 0.627711 0.353591 0.018697 -> 0.627711 
 41 C B 0.938649 0.059466 0.001885 -> 0.938649 
 42 G B 0.909876 0.083546 0.006578 -> 0.909876 
 43 G B 0.955563 0.043021 0.001416 -> 0.955563 
 44 S B 0.944109 0.052261 0.003630 -> 0.944109 
 45 L B 0.959304 0.037567 0.003129 -> 0.959304 
 46 V B 0.833758 0.160766 0.005476 -> 0.833758 
 47 K M 0.144278 0.710005 0.145718 -> 0.710005 
 48 E E 0.029949 0.322106 0.647944 -> 0.647944 
 49 Q M 0.107779 0.653577 0.238644 -> 0.653577 
 50 W B 0.637478 0.347233 0.015289 -> 0.637478 
 51 I B 0.924047 0.071959 0.003994 -> 0.924047 
 52 L B 0.964125 0.033492 0.002382 -> 0.964125 
 53 T B 0.904610 0.081201 0.014189 -> 0.904610 
 54 A B 0.890428 0.100504 0.009069 -> 0.890428 
 55 R M 0.301698 0.518211 0.180091 -> 0.518211 
 56 Q M 0.358544 0.421202 0.220254 -> 0.421202 
 57 C B 0.604337 0.348699 0.046964 -> 0.604337 
 58 F B 0.760448 0.217957 0.021595 -> 0.760448 
 59 S M 0.173736 0.495691 0.330573 -> 0.495691 
 60 S E 0.061624 0.281583 0.656793 -> 0.656793 
 61 C M 0.196652 0.445297 0.358051 -> 0.445297 
 62 H E 0.050523 0.215306 0.734171 -> 0.734171 
 63 M M 0.171331 0.536533 0.292136 -> 0.536533 
 64 P E 0.036576 0.285218 0.678206 -> 0.678206 
 65 L M 0.196603 0.535981 0.267416 -> 0.535981 
 66 T E 0.059778 0.354436 0.585786 -> 0.585786 
 67 G M 0.332328 0.497400 0.170272 -> 0.497400 
 68 Y B 0.675226 0.313782 0.010992 -> 0.675226 
 69 E M 0.447674 0.520984 0.031342 -> 0.520984 
 70 V B 0.973748 0.025238 0.001014 -> 0.973748 
 71 W B 0.637040 0.343377 0.019583 -> 0.637040 
 72 L B 0.895423 0.097208 0.007369 -> 0.895423 
 73 G B 0.771986 0.194741 0.033273 -> 0.771986 
 74 T M 0.395799 0.489613 0.114587 -> 0.489613 
 75 L M 0.412760 0.494399 0.092841 -> 0.494399 
 76 F M 0.171214 0.615528 0.213258 -> 0.615528 
 77 Q E 0.047541 0.383871 0.568587 -> 0.568587 
 78 N E 0.023974 0.162048 0.813979 -> 0.813979 
 79 E E 0.021982 0.334574 0.643444 -> 0.643444 
 80 P E 0.022331 0.164783 0.812886 -> 0.812886 
 81 S E 0.024459 0.181093 0.794447 -> 0.794447 
 82 L M 0.202071 0.573065 0.224864 -> 0.573065 
 83 Q E 0.078827 0.431485 0.489688 -> 0.489688 
 84 R E 0.026495 0.286416 0.687089 -> 0.687089 
 85 V B 0.493304 0.468593 0.038103 -> 0.493304 
 86 P E 0.029942 0.274624 0.695434 -> 0.695434 
 87 V M 0.426115 0.496669 0.077216 -> 0.496669 
 88 A E 0.023204 0.290493 0.686303 -> 0.686303 
 89 K E 0.006221 0.211028 0.782752 -> 0.782752 
 90 M M 0.246024 0.611100 0.142876 -> 0.611100 
 91 V M 0.313122 0.528936 0.157942 -> 0.528936 
 92 C M 0.249908 0.413676 0.336416 -> 0.413676 
 93 G B 0.565244 0.372065 0.062691 -> 0.565244 
 94 P E 0.019388 0.216728 0.763884 -> 0.763884 
 95 S E 0.022710 0.244698 0.732592 -> 0.732592 
 96 G M 0.346311 0.488160 0.165528 -> 0.488160 
 97 S B 0.645934 0.302260 0.051806 -> 0.645934 
 98 Q M 0.439005 0.512264 0.048731 -> 0.512264 
 99 L B 0.971422 0.026322 0.002256 -> 0.971422 
 100 V B 0.965984 0.032224 0.001791 -> 0.965984 
 101 L B 0.984422 0.014496 0.001082 -> 0.984422 
 102 L B 0.994272 0.005632 0.000096 -> 0.994272 
 103 K M 0.287984 0.658568 0.053448 -> 0.658568 
 104 L B 0.973035 0.025162 0.001803 -> 0.973035 
 105 E E 0.008503 0.424621 0.566876 -> 0.566876 
 106 R E 0.004972 0.173441 0.821587 -> 0.821587 
 107 S E 0.004412 0.129140 0.866448 -> 0.866448 
 108 V B 0.747864 0.246031 0.006105 -> 0.747864 
 109 T E 0.011324 0.237759 0.750917 -> 0.750917 
 110 L M 0.390931 0.527564 0.081504 -> 0.527564 
 111 N M 0.125468 0.623437 0.251095 -> 0.623437 
 112 Q E 0.015835 0.200187 0.783978 -> 0.783978 
 113 R M 0.066121 0.648966 0.284912 -> 0.648966 
 114 V B 0.857489 0.129664 0.012847 -> 0.857489 
 115 A B 0.469389 0.467900 0.062711 -> 0.469389 
 116 L B 0.720752 0.255336 0.023912 -> 0.720752 
 117 I B 0.926973 0.065669 0.007358 -> 0.926973 
 118 C B 0.631574 0.345685 0.022740 -> 0.631574 
 119 L B 0.912239 0.081154 0.006607 -> 0.912239 
 120 P B 0.484760 0.437923 0.077317 -> 0.484760 
 121 P M 0.168889 0.480866 0.350245 -> 0.480866 
 122 E E 0.012637 0.119097 0.868266 -> 0.868266 
 123 W E 0.141740 0.369485 0.488775 -> 0.488775 
 124 Y M 0.218867 0.572282 0.208850 -> 0.572282 
 125 V E 0.053287 0.276951 0.669762 -> 0.669762 
 126 V B 0.457858 0.438973 0.103169 -> 0.457858 
 127 P M 0.072877 0.473809 0.453315 -> 0.473809 
 128 P E 0.008523 0.116152 0.875325 -> 0.875325 
 129 G E 0.015488 0.141491 0.843021 -> 0.843021 
 130 T M 0.240025 0.663026 0.096950 -> 0.663026 
 131 K E 0.008901 0.277096 0.714003 -> 0.714003 
 132 C B 0.944076 0.054635 0.001290 -> 0.944076 
 133 E M 0.378577 0.575590 0.045833 -> 0.575590 
 134 I B 0.955168 0.041779 0.003052 -> 0.955168 
 135 A B 0.893493 0.095357 0.011150 -> 0.893493 
 136 G B 0.746654 0.213155 0.040191 -> 0.746654 
 137 W B 0.521141 0.388442 0.090417 -> 0.521141 
 138 T E 0.087526 0.369115 0.543358 -> 0.543358 
 139 V M 0.235867 0.493592 0.270541 -> 0.493592 
 140 L B 0.667330 0.237922 0.094749 -> 0.667330 
 141 N M 0.106087 0.523784 0.370129 -> 0.523784 
 142 V E 0.115763 0.292281 0.591957 -> 0.591957 
 143 A B 0.522113 0.358044 0.119843 -> 0.522113 
 144 L E 0.028568 0.230571 0.740861 -> 0.740861 
 145 L B 0.695809 0.275988 0.028202 -> 0.695809 
 146 N E 0.056375 0.354995 0.588629 -> 0.588629 
 147 V M 0.364569 0.482058 0.153373 -> 0.482058 
 148 I M 0.378236 0.547780 0.073984 -> 0.547780 
 149 S M 0.063591 0.471443 0.464967 -> 0.471443 
 150 N E 0.021760 0.405015 0.573225 -> 0.573225 
 151 Q E 0.001117 0.025074 0.973809 -> 0.973809 
 152 E E 0.013990 0.341681 0.644329 -> 0.644329 
 153 C B 0.541657 0.424104 0.034240 -> 0.541657 
 154 N E 0.038846 0.424172 0.536982 -> 0.536982 
 155 I E 0.043974 0.262839 0.693187 -> 0.693187 
 156 K E 0.029034 0.364220 0.606746 -> 0.606746 
 157 H M 0.218903 0.530555 0.250542 -> 0.530555 
 158 R E 0.011147 0.132648 0.856204 -> 0.856204 
 159 G E 0.042779 0.250467 0.706754 -> 0.706754 
 160 R E 0.031267 0.416745 0.551988 -> 0.551988 
 161 V B 0.684748 0.286335 0.028917 -> 0.684748 
 162 R M 0.071328 0.576533 0.352139 -> 0.576533 
 163 E E 0.010429 0.225746 0.763825 -> 0.763825 
 164 S B 0.522467 0.416785 0.060748 -> 0.522467 
 165 E B 0.684316 0.290268 0.025416 -> 0.684316 
 166 M B 0.963656 0.032242 0.004102 -> 0.963656 
 167 C B 0.897793 0.093946 0.008261 -> 0.897793 
 168 T B 0.949878 0.042426 0.007696 -> 0.949878 
 169 E M 0.337008 0.507908 0.155084 -> 0.507908 
 170 G B 0.446763 0.422245 0.130992 -> 0.446763 
 171 L M 0.172695 0.455017 0.372288 -> 0.455017 
 172 L E 0.058814 0.212965 0.728221 -> 0.728221 
 173 A E 0.075537 0.285865 0.638597 -> 0.638597 
 174 P E 0.015186 0.180785 0.804028 -> 0.804028 
 175 V E 0.080439 0.374605 0.544956 -> 0.544956 
 176 G M 0.347804 0.424320 0.227876 -> 0.424320 
 177 A M 0.301377 0.366054 0.332569 -> 0.366054 
 178 C M 0.351448 0.440622 0.207930 -> 0.440622 
 179 E E 0.091629 0.358157 0.550215 -> 0.550215 
 180 G M 0.279557 0.415716 0.304727 -> 0.415716 
 181 D B 0.726846 0.224917 0.048237 -> 0.726846 
 182 Y B 0.448631 0.434602 0.116767 -> 0.448631 
 183 G B 0.741748 0.186328 0.071923 -> 0.741748 
 184 G B 0.824206 0.154758 0.021036 -> 0.824206 
 185 P B 0.826612 0.143669 0.029718 -> 0.826612 
 186 L B 0.941316 0.054755 0.003929 -> 0.941316 
 187 A B 0.881184 0.112178 0.006638 -> 0.881184 
 188 C B 0.833907 0.162862 0.003231 -> 0.833907 
 189 F M 0.190652 0.633276 0.176072 -> 0.633276 
 190 T M 0.130619 0.627774 0.241607 -> 0.627774 
 191 H E 0.008283 0.137866 0.853851 -> 0.853851 
 192 N E 0.017704 0.202614 0.779682 -> 0.779682 
 193 S M 0.281389 0.500308 0.218303 -> 0.500308 
 194 W M 0.353326 0.530341 0.116333 -> 0.530341 
 195 V B 0.611417 0.374355 0.014228 -> 0.611417 
 196 L B 0.953234 0.045798 0.000967 -> 0.953234 
 197 E B 0.639858 0.352470 0.007672 -> 0.639858 
 198 G B 0.966425 0.032182 0.001392 -> 0.966425 
 199 I B 0.975677 0.022933 0.001391 -> 0.975677 
 200 I B 0.929455 0.067884 0.002661 -> 0.929455 
 201 I B 0.919935 0.076288 0.003777 -> 0.919935 
 202 P B 0.611352 0.337284 0.051364 -> 0.611352 
 203 N M 0.360356 0.463060 0.176584 -> 0.463060 
 204 R M 0.110750 0.482518 0.406732 -> 0.482518 
 205 V B 0.360578 0.319595 0.319826 -> 0.360578 
 206 C B 0.432664 0.347975 0.219361 -> 0.432664 
 207 A E 0.241639 0.246457 0.511904 -> 0.511904 
 208 R E 0.054638 0.418184 0.527178 -> 0.527178 
 209 S E 0.141906 0.304573 0.553521 -> 0.553521 
 210 R E 0.026665 0.256267 0.717067 -> 0.717067 
 211 W M 0.340583 0.607959 0.051458 -> 0.607959 
 212 P B 0.786244 0.192662 0.021094 -> 0.786244 
 213 A B 0.891666 0.104736 0.003599 -> 0.891666 
 214 V B 0.966191 0.031983 0.001826 -> 0.966191 
 215 F B 0.907289 0.088485 0.004226 -> 0.907289 
 216 T B 0.963996 0.034133 0.001871 -> 0.963996 
 217 R M 0.175583 0.696981 0.127436 -> 0.696981 
 218 V B 0.903734 0.085644 0.010622 -> 0.903734 
 219 S M 0.455194 0.467594 0.077212 -> 0.467594 
 220 V M 0.120921 0.476124 0.402955 -> 0.476124 
 221 F B 0.812489 0.152338 0.035173 -> 0.812489 
 222 V B 0.514302 0.465817 0.019882 -> 0.514302 
 223 D E 0.007953 0.169278 0.822769 -> 0.822769 
 224 W M 0.418856 0.528475 0.052669 -> 0.528475 
 225 I B 0.951361 0.043744 0.004895 -> 0.951361 
 226 H M 0.036480 0.679816 0.283705 -> 0.679816 
 227 K E 0.002029 0.060088 0.937882 -> 0.937882 
 228 V M 0.210056 0.647355 0.142589 -> 0.647355 
 229 M B 0.666151 0.288574 0.045275 -> 0.666151 
 230 R E 0.037710 0.201991 0.760299 -> 0.760299 
 231 L E 0.005226 0.122390 0.872384 -> 0.872384 
