# Supplementary material for: AcconPred: Predicting Solvent Accessibility and Contact Number Simultaneously by a Multitask Learning Framework under the Conditional Neural Fields Model
Source: Biomed Res Int. 2015 Aug 3;2015:678764. doi: 10.1155/2015/678764 (PMC4538422; doi:10.1155/2015/678764)
Supplement: Supplementary file 1 — Training/testing dataset as well as the CASP11 evaluation dataset could be found in the Supplementary Material. The CASP11 evaluation dataset contains all detailed results from SPINE-X, SANN, ACCpro5 and AcconPred. [file 678764.f1.zip › Supplmentary_Files/105_casp11_domain/casp11_domain_AcconPred/T0843-D1.reso]

# AcconPred: three-state solvent accessibility prediction results 
# probabilities are in the order of B (Bury, pACC: 0-10), M (Medium, pACC: 11-40) and E (Exposed, pACC: 41-100), 
# where pACC is the relative solvent accessibility value calculated by DSSP 
# output format: <position> <one letter amino acid> <predicted label> ... <probabilities> ... -> <maximal probability> 

 1 A E 0.008778 0.072463 0.918759 -> 0.918759 
 2 M E 0.018351 0.172848 0.808801 -> 0.808801 
 3 I M 0.351439 0.524715 0.123846 -> 0.524715 
 4 P E 0.121776 0.353854 0.524370 -> 0.524370 
 5 L B 0.494754 0.368705 0.136541 -> 0.494754 
 6 F M 0.325161 0.440766 0.234073 -> 0.440766 
 7 K E 0.015008 0.212368 0.772624 -> 0.772624 
 8 V M 0.142369 0.555079 0.302552 -> 0.555079 
 9 A E 0.106776 0.331808 0.561416 -> 0.561416 
 10 V B 0.690074 0.282172 0.027754 -> 0.690074 
 11 S E 0.047288 0.463584 0.489128 -> 0.489128 
 12 P E 0.007493 0.102892 0.889615 -> 0.889615 
 13 T E 0.007909 0.146039 0.846052 -> 0.846052 
 14 A B 0.748109 0.232653 0.019239 -> 0.748109 
 15 L B 0.521907 0.462186 0.015907 -> 0.521907 
 16 D E 0.007158 0.118959 0.873883 -> 0.873883 
 17 R M 0.167172 0.791125 0.041703 -> 0.791125 
 18 V B 0.990834 0.007688 0.001478 -> 0.990834 
 19 A M 0.166586 0.669401 0.164013 -> 0.669401 
 20 E E 0.006511 0.192928 0.800561 -> 0.800561 
 21 V B 0.830293 0.159444 0.010263 -> 0.830293 
 22 F B 0.660576 0.328646 0.010778 -> 0.660576 
 23 A E 0.012123 0.149891 0.837985 -> 0.837985 
 24 S E 0.041640 0.327323 0.631037 -> 0.631037 
 25 G E 0.113359 0.416749 0.469892 -> 0.469892 
 26 Y M 0.123501 0.506714 0.369785 -> 0.506714 
 27 L B 0.572128 0.338975 0.088896 -> 0.572128 
 28 G B 0.488855 0.274279 0.236865 -> 0.488855 
 29 Q E 0.028889 0.166003 0.805108 -> 0.805108 
 30 G M 0.243805 0.493649 0.262546 -> 0.493649 
 31 P E 0.016271 0.138463 0.845267 -> 0.845267 
 32 R M 0.050897 0.579232 0.369871 -> 0.579232 
 33 V B 0.612282 0.374507 0.013210 -> 0.612282 
 34 A E 0.023000 0.274497 0.702503 -> 0.702503 
 35 E E 0.004743 0.174488 0.820769 -> 0.820769 
 36 F B 0.942663 0.051109 0.006229 -> 0.942663 
 37 E B 0.716243 0.263904 0.019854 -> 0.716243 
 38 S E 0.011392 0.228381 0.760227 -> 0.760227 
 39 A M 0.147985 0.744675 0.107340 -> 0.744675 
 40 L B 0.992826 0.005962 0.001213 -> 0.992826 
 41 A M 0.303951 0.598558 0.097491 -> 0.598558 
 42 A E 0.003391 0.036829 0.959780 -> 0.959780 
 43 R M 0.036438 0.674863 0.288699 -> 0.674863 
 44 L B 0.520564 0.454777 0.024659 -> 0.520564 
 45 G E 0.006985 0.067321 0.925694 -> 0.925694 
 46 N M 0.203428 0.746242 0.050330 -> 0.746242 
 47 P E 0.009481 0.207355 0.783164 -> 0.783164 
 48 R M 0.049919 0.794812 0.155269 -> 0.794812 
 49 V B 0.973128 0.026305 0.000567 -> 0.973128 
 50 V B 0.977302 0.021590 0.001108 -> 0.977302 
 51 S B 0.969569 0.027538 0.002893 -> 0.969569 
 52 V B 0.942379 0.054315 0.003307 -> 0.942379 
 53 H M 0.288844 0.540267 0.170889 -> 0.540267 
 54 S M 0.431685 0.460675 0.107640 -> 0.460675 
 55 G B 0.831524 0.155381 0.013096 -> 0.831524 
 56 T B 0.627866 0.331704 0.040430 -> 0.627866 
 57 S B 0.713103 0.254457 0.032440 -> 0.713103 
 58 G B 0.987053 0.010550 0.002398 -> 0.987053 
 59 L B 0.964315 0.034579 0.001106 -> 0.964315 
 60 C B 0.882207 0.111434 0.006360 -> 0.882207 
 61 L B 0.975796 0.019214 0.004989 -> 0.975796 
 62 A B 0.995479 0.004350 0.000171 -> 0.995479 
 63 L B 0.985599 0.013208 0.001193 -> 0.985599 
 64 R M 0.157865 0.685033 0.157102 -> 0.685033 
 65 L B 0.772544 0.206161 0.021295 -> 0.772544 
 66 L B 0.627650 0.369293 0.003057 -> 0.627650 
 67 D E 0.027183 0.339101 0.633716 -> 0.633716 
 68 A M 0.320203 0.543314 0.136482 -> 0.543314 
 69 P M 0.108951 0.492277 0.398772 -> 0.492277 
 70 E E 0.002952 0.086784 0.910264 -> 0.910264 
 71 E E 0.009766 0.164529 0.825705 -> 0.825705 
 72 R E 0.035812 0.316816 0.647371 -> 0.647371 
 73 D M 0.245604 0.604109 0.150287 -> 0.604109 
 74 E M 0.354655 0.613032 0.032313 -> 0.613032 
 75 V B 0.945691 0.052100 0.002210 -> 0.945691 
 76 L B 0.948886 0.048194 0.002920 -> 0.948886 
 77 S B 0.982609 0.014716 0.002674 -> 0.982609 
 78 T B 0.809137 0.181728 0.009134 -> 0.809137 
 79 P M 0.462591 0.464778 0.072631 -> 0.464778 
 80 L B 0.612956 0.297043 0.090001 -> 0.612956 
 81 T B 0.776772 0.204085 0.019143 -> 0.776772 
 82 F B 0.829867 0.155087 0.015047 -> 0.829867 
 83 E B 0.719699 0.235601 0.044700 -> 0.719699 
 84 A B 0.945325 0.049317 0.005359 -> 0.945325 
 85 T B 0.982421 0.015690 0.001889 -> 0.982421 
 86 N B 0.890081 0.107486 0.002433 -> 0.890081 
 87 W M 0.445065 0.513670 0.041265 -> 0.513670 
 88 A B 0.968280 0.027914 0.003806 -> 0.968280 
 89 I B 0.958809 0.038400 0.002791 -> 0.958809 
 90 L M 0.140707 0.722434 0.136859 -> 0.722434 
 91 A M 0.152720 0.424764 0.422516 -> 0.424764 
 92 D M 0.306279 0.533313 0.160409 -> 0.533313 
 93 G E 0.092914 0.293093 0.613993 -> 0.613993 
 94 R M 0.484490 0.486119 0.029391 -> 0.486119 
 95 R E 0.002300 0.137749 0.859952 -> 0.859952 
 96 I B 0.541200 0.444459 0.014341 -> 0.541200 
 97 T M 0.244336 0.683372 0.072292 -> 0.683372 
 98 W M 0.112033 0.581507 0.306460 -> 0.581507 
 99 V B 0.827851 0.158543 0.013605 -> 0.827851 
 100 D M 0.125255 0.583636 0.291109 -> 0.583636 
 101 V B 0.754415 0.228592 0.016993 -> 0.754415 
 102 D M 0.095508 0.598232 0.306260 -> 0.598232 
 103 P E 0.063584 0.439684 0.496732 -> 0.496732 
 104 A E 0.013112 0.156665 0.830223 -> 0.830223 
 105 T E 0.071455 0.372047 0.556498 -> 0.556498 
 106 L B 0.557682 0.356881 0.085437 -> 0.557682 
 107 T M 0.224137 0.439568 0.336294 -> 0.439568 
 108 M B 0.571954 0.398888 0.029158 -> 0.571954 
 109 D M 0.212523 0.571309 0.216169 -> 0.571309 
 110 L M 0.413837 0.560906 0.025256 -> 0.560906 
 111 D E 0.006259 0.152243 0.841499 -> 0.841499 
 112 D M 0.078888 0.741481 0.179631 -> 0.741481 
 113 L B 0.990889 0.007786 0.001325 -> 0.990889 
 114 E M 0.019749 0.550715 0.429536 -> 0.550715 
 115 R E 0.003608 0.032622 0.963770 -> 0.963770 
 116 K M 0.012580 0.524567 0.462852 -> 0.524567 
 117 I B 0.632565 0.359664 0.007771 -> 0.632565 
 118 S M 0.065519 0.500360 0.434121 -> 0.500360 
 119 P E 0.006733 0.042660 0.950607 -> 0.950607 
 120 A M 0.069677 0.516562 0.413761 -> 0.516562 
 121 T B 0.859618 0.135972 0.004411 -> 0.859618 
 122 R M 0.083673 0.759822 0.156505 -> 0.759822 
 123 A B 0.981141 0.018585 0.000274 -> 0.981141 
 124 I B 0.982499 0.016464 0.001038 -> 0.982499 
 125 I B 0.992427 0.007170 0.000403 -> 0.992427 
 126 V B 0.986824 0.012677 0.000500 -> 0.986824 
 127 V B 0.891571 0.100750 0.007679 -> 0.891571 
 128 H B 0.777190 0.197286 0.025524 -> 0.777190 
 129 W B 0.693132 0.253829 0.053039 -> 0.693132 
 130 T B 0.544668 0.334440 0.120892 -> 0.544668 
 131 G B 0.627695 0.266730 0.105574 -> 0.627695 
 132 Y M 0.350351 0.530791 0.118858 -> 0.530791 
 133 P B 0.437800 0.383983 0.178218 -> 0.437800 
 134 V B 0.792755 0.197982 0.009263 -> 0.792755 
 135 D M 0.085338 0.571467 0.343195 -> 0.571467 
 136 L B 0.495052 0.482155 0.022793 -> 0.495052 
 137 D E 0.003850 0.087999 0.908151 -> 0.908151 
 138 R M 0.035010 0.751238 0.213752 -> 0.751238 
 139 L B 0.993905 0.005129 0.000967 -> 0.993905 
 140 A M 0.201537 0.703852 0.094610 -> 0.703852 
 141 G E 0.020085 0.333838 0.646077 -> 0.646077 
 142 I B 0.959810 0.036801 0.003389 -> 0.959810 
 143 L B 0.762350 0.230550 0.007099 -> 0.762350 
 144 D E 0.004159 0.130201 0.865640 -> 0.865640 
 145 R M 0.012699 0.562293 0.425008 -> 0.562293 
 146 A B 0.706692 0.280552 0.012756 -> 0.706692 
 147 E E 0.006658 0.231507 0.761835 -> 0.761835 
 148 R E 0.008431 0.126782 0.864787 -> 0.864787 
 149 E E 0.067080 0.380146 0.552774 -> 0.552774 
 150 H E 0.062682 0.411998 0.525320 -> 0.525320 
 151 G E 0.048131 0.233236 0.718633 -> 0.718633 
 152 F M 0.320434 0.577701 0.101865 -> 0.577701 
 153 R E 0.033635 0.352918 0.613447 -> 0.613447 
 154 P B 0.833987 0.160438 0.005575 -> 0.833987 
 155 A B 0.808731 0.189792 0.001476 -> 0.808731 
 156 V B 0.925659 0.073021 0.001320 -> 0.925659 
 157 I B 0.979426 0.019712 0.000862 -> 0.979426 
 158 E B 0.928853 0.069056 0.002091 -> 0.928853 
 159 D B 0.886379 0.101881 0.011739 -> 0.886379 
 160 C B 0.947571 0.047452 0.004978 -> 0.947571 
 161 A B 0.981274 0.015356 0.003370 -> 0.981274 
 162 H B 0.663558 0.308321 0.028121 -> 0.663558 
 163 A B 0.902242 0.090617 0.007141 -> 0.902242 
 164 W B 0.666434 0.300281 0.033285 -> 0.666434 
 165 G M 0.412327 0.414069 0.173604 -> 0.414069 
 166 A B 0.863303 0.127203 0.009494 -> 0.863303 
 167 S M 0.108254 0.518320 0.373426 -> 0.518320 
 168 Y M 0.318980 0.582474 0.098546 -> 0.582474 
 169 R E 0.005839 0.143936 0.850226 -> 0.850226 
 170 G E 0.020796 0.103726 0.875478 -> 0.875478 
 171 V M 0.137470 0.630762 0.231768 -> 0.630762 
 172 P E 0.065925 0.351458 0.582617 -> 0.582617 
 173 L B 0.623527 0.330735 0.045739 -> 0.623527 
 174 G B 0.587337 0.306658 0.106004 -> 0.587337 
 175 S M 0.277160 0.406271 0.316568 -> 0.406271 
 176 H M 0.406102 0.457567 0.136331 -> 0.457567 
 177 G B 0.871412 0.117838 0.010750 -> 0.871412 
 178 N B 0.529594 0.418458 0.051947 -> 0.529594 
 179 M B 0.879724 0.113245 0.007032 -> 0.879724 
 180 C B 0.971900 0.026478 0.001622 -> 0.971900 
 181 V B 0.965171 0.032284 0.002544 -> 0.965171 
 182 F B 0.955171 0.039358 0.005471 -> 0.955171 
 183 S B 0.905144 0.086187 0.008670 -> 0.905144 
 184 F B 0.770279 0.217273 0.012448 -> 0.770279 
 185 Q B 0.567052 0.371931 0.061017 -> 0.567052 
 186 A B 0.461955 0.356206 0.181839 -> 0.461955 
 187 L M 0.405057 0.439849 0.155093 -> 0.439849 
 188 H M 0.427278 0.444010 0.128713 -> 0.444010 
 189 L B 0.572060 0.348525 0.079415 -> 0.572060 
 190 T B 0.662949 0.273379 0.063673 -> 0.662949 
 191 C B 0.691052 0.243810 0.065138 -> 0.691052 
 192 G B 0.697698 0.212053 0.090249 -> 0.697698 
 193 D M 0.369901 0.425173 0.204927 -> 0.425173 
 194 G B 0.836720 0.145297 0.017984 -> 0.836720 
 195 G B 0.909516 0.087805 0.002679 -> 0.909516 
 196 L B 0.934339 0.064219 0.001442 -> 0.934339 
 197 L B 0.980420 0.017768 0.001812 -> 0.980420 
 198 T B 0.911930 0.078166 0.009904 -> 0.911930 
 199 L B 0.937718 0.061036 0.001246 -> 0.937718 
 200 P M 0.222357 0.488549 0.289094 -> 0.488549 
 201 G M 0.120577 0.650790 0.228633 -> 0.650790 
 202 D E 0.008181 0.138082 0.853737 -> 0.853737 
 203 E E 0.020443 0.279549 0.700008 -> 0.700008 
 204 L B 0.555257 0.373966 0.070777 -> 0.555257 
 205 H M 0.185450 0.605703 0.208847 -> 0.605703 
 206 E E 0.037484 0.248769 0.713747 -> 0.713747 
 207 R M 0.170167 0.619057 0.210776 -> 0.619057 
 208 A B 0.717788 0.219625 0.062587 -> 0.717788 
 209 M M 0.137201 0.500106 0.362694 -> 0.500106 
 210 L M 0.178703 0.438780 0.382518 -> 0.438780 
 211 R M 0.291890 0.508295 0.199816 -> 0.508295 
 212 R E 0.113147 0.358878 0.527975 -> 0.527975 
 213 F E 0.154111 0.267351 0.578538 -> 0.578538 
 214 Y M 0.180051 0.501435 0.318514 -> 0.501435 
 215 G E 0.297553 0.245437 0.457010 -> 0.457010 
 216 I M 0.260412 0.510014 0.229574 -> 0.510014 
 217 D E 0.164689 0.355768 0.479543 -> 0.479543 
 218 R E 0.073859 0.404656 0.521485 -> 0.521485 
 219 T E 0.156451 0.403187 0.440362 -> 0.440362 
 220 A M 0.251469 0.430538 0.317993 -> 0.430538 
 221 D E 0.012893 0.113497 0.873611 -> 0.873611 
 222 R E 0.049276 0.366386 0.584337 -> 0.584337 
 223 L B 0.536444 0.365599 0.097956 -> 0.536444 
 224 R E 0.032840 0.310569 0.656591 -> 0.656591 
 225 G E 0.175111 0.386894 0.437996 -> 0.437996 
 226 A M 0.207687 0.458058 0.334255 -> 0.458058 
 227 Y B 0.580032 0.381598 0.038370 -> 0.580032 
 228 D M 0.261007 0.465167 0.273825 -> 0.465167 
 229 V B 0.571204 0.373466 0.055330 -> 0.571204 
 230 A B 0.527724 0.332723 0.139553 -> 0.527724 
 231 E M 0.396973 0.405343 0.197683 -> 0.405343 
 232 W B 0.474045 0.416114 0.109841 -> 0.474045 
 233 G E 0.294491 0.348684 0.356825 -> 0.356825 
 234 L M 0.254635 0.476864 0.268501 -> 0.476864 
 235 K E 0.073385 0.405852 0.520763 -> 0.520763 
 236 W B 0.750188 0.228264 0.021548 -> 0.750188 
 237 H M 0.251206 0.633895 0.114899 -> 0.633895 
 238 M B 0.739540 0.220071 0.040388 -> 0.739540 
 239 T B 0.508826 0.393679 0.097495 -> 0.508826 
 240 D B 0.714447 0.255917 0.029636 -> 0.714447 
 241 L B 0.972310 0.024012 0.003679 -> 0.972310 
 242 N B 0.812797 0.177206 0.009996 -> 0.812797 
 243 A B 0.962700 0.033282 0.004017 -> 0.962700 
 244 A B 0.952887 0.044404 0.002709 -> 0.952887 
 245 I B 0.966118 0.030504 0.003378 -> 0.966118 
 246 G B 0.979088 0.017221 0.003691 -> 0.979088 
 247 L B 0.638294 0.344076 0.017630 -> 0.638294 
 248 A B 0.657255 0.277593 0.065152 -> 0.657255 
 249 N B 0.621464 0.336294 0.042242 -> 0.621464 
 250 L B 0.858913 0.130659 0.010428 -> 0.858913 
 251 E E 0.005237 0.077238 0.917525 -> 0.917525 
 252 T M 0.081239 0.667233 0.251528 -> 0.667233 
 253 V B 0.704691 0.267895 0.027414 -> 0.704691 
 254 D E 0.014314 0.272828 0.712858 -> 0.712858 
 255 E E 0.009281 0.140261 0.850458 -> 0.850458 
 256 Q M 0.447951 0.484154 0.067895 -> 0.484154 
 257 L M 0.308779 0.570994 0.120227 -> 0.570994 
 258 R E 0.003048 0.089450 0.907503 -> 0.907503 
 259 L M 0.209378 0.646045 0.144577 -> 0.646045 
 260 H B 0.626038 0.337492 0.036470 -> 0.626038 
 261 R E 0.021137 0.394162 0.584701 -> 0.584701 
 262 E E 0.011872 0.271118 0.717010 -> 0.717010 
 263 N B 0.681902 0.289598 0.028500 -> 0.681902 
 264 A B 0.792471 0.177648 0.029881 -> 0.792471 
 265 A E 0.051256 0.374023 0.574721 -> 0.574721 
 266 F M 0.253436 0.651508 0.095056 -> 0.651508 
 267 Y B 0.807482 0.179414 0.013104 -> 0.807482 
 268 D M 0.131235 0.788199 0.080567 -> 0.788199 
 269 K E 0.001281 0.037197 0.961522 -> 0.961522 
 270 E M 0.054658 0.675773 0.269570 -> 0.675773 
 271 L B 0.929858 0.063658 0.006484 -> 0.929858 
 272 T E 0.009034 0.162125 0.828841 -> 0.828841 
 273 G E 0.002134 0.048327 0.949539 -> 0.949539 
 274 V M 0.452986 0.515960 0.031054 -> 0.515960 
 275 P E 0.005824 0.067530 0.926647 -> 0.926647 
 276 G E 0.023113 0.231011 0.745876 -> 0.745876 
 277 L M 0.440177 0.531573 0.028251 -> 0.531573 
 278 E E 0.011936 0.207089 0.780975 -> 0.780975 
 279 L M 0.360110 0.578918 0.060972 -> 0.578918 
 280 L M 0.396616 0.507224 0.096160 -> 0.507224 
 281 Q E 0.071448 0.366004 0.562548 -> 0.562548 
 282 R E 0.027123 0.281737 0.691140 -> 0.691140 
 283 S M 0.291950 0.559454 0.148596 -> 0.559454 
 284 P E 0.026183 0.198131 0.775686 -> 0.775686 
 285 D E 0.009470 0.103267 0.887262 -> 0.887262 
 286 R M 0.208675 0.598426 0.192899 -> 0.598426 
 287 E E 0.155975 0.407496 0.436529 -> 0.436529 
 288 G B 0.637933 0.302242 0.059824 -> 0.637933 
 289 S B 0.816100 0.164016 0.019883 -> 0.816100 
 290 F B 0.750007 0.235453 0.014539 -> 0.750007 
 291 Y B 0.624142 0.335304 0.040554 -> 0.624142 
 292 V B 0.778356 0.207228 0.014417 -> 0.778356 
 293 Y B 0.752671 0.234841 0.012488 -> 0.752671 
 294 D B 0.590181 0.379440 0.030379 -> 0.590181 
 295 V B 0.926055 0.071803 0.002142 -> 0.926055 
 296 K M 0.047079 0.630066 0.322856 -> 0.630066 
 297 V B 0.835698 0.155184 0.009118 -> 0.835698 
 298 D E 0.005694 0.163844 0.830461 -> 0.830461 
 299 D E 0.013186 0.268396 0.718418 -> 0.718418 
 300 R M 0.107391 0.749478 0.143131 -> 0.749478 
 301 P E 0.010099 0.143516 0.846385 -> 0.846385 
 302 A M 0.107562 0.575658 0.316780 -> 0.575658 
 303 F B 0.981312 0.014252 0.004436 -> 0.981312 
 304 H M 0.277891 0.675171 0.046938 -> 0.675171 
 305 R E 0.002003 0.111680 0.886317 -> 0.886317 
 306 K M 0.045597 0.793656 0.160747 -> 0.793656 
 307 M B 0.977378 0.020439 0.002182 -> 0.977378 
 308 E E 0.005549 0.227220 0.767231 -> 0.767231 
 309 A E 0.003125 0.019809 0.977066 -> 0.977066 
 310 A M 0.057857 0.621034 0.321110 -> 0.621034 
 311 G E 0.079880 0.287768 0.632352 -> 0.632352 
 312 I B 0.965008 0.032833 0.002159 -> 0.965008 
 313 M M 0.331691 0.548772 0.119537 -> 0.548772 
 314 A B 0.750307 0.216834 0.032860 -> 0.750307 
 315 G B 0.469004 0.433954 0.097042 -> 0.469004 
 316 L M 0.269853 0.494671 0.235476 -> 0.494671 
 317 V B 0.643688 0.307591 0.048721 -> 0.643688 
 318 S B 0.569236 0.337951 0.092813 -> 0.569236 
 319 R M 0.252213 0.491486 0.256301 -> 0.491486 
 320 R M 0.329762 0.400308 0.269930 -> 0.400308 
 321 N B 0.552211 0.279202 0.168587 -> 0.552211 
 322 D E 0.296764 0.321342 0.381894 -> 0.381894 
 323 E E 0.251308 0.368359 0.380334 -> 0.380334 
 324 H M 0.399266 0.476169 0.124565 -> 0.476169 
 325 S E 0.092326 0.305831 0.601843 -> 0.601843 
 326 C M 0.299405 0.380872 0.319723 -> 0.380872 
 327 V B 0.498139 0.381793 0.120068 -> 0.498139 
 328 A E 0.249975 0.285724 0.464301 -> 0.464301 
 329 H M 0.120804 0.445042 0.434154 -> 0.445042 
 330 L M 0.253515 0.523328 0.223157 -> 0.523328 
 331 R E 0.019697 0.208915 0.771389 -> 0.771389 
 332 T E 0.045120 0.194066 0.760814 -> 0.760814 
 333 S E 0.048590 0.353957 0.597453 -> 0.597453 
 334 L B 0.535736 0.429919 0.034346 -> 0.535736 
 335 P E 0.022764 0.185085 0.792151 -> 0.792151 
 336 G M 0.300515 0.521525 0.177959 -> 0.521525 
 337 L B 0.949420 0.047032 0.003548 -> 0.949420 
 338 D M 0.136475 0.655270 0.208255 -> 0.655270 
 339 S E 0.035767 0.449435 0.514798 -> 0.514798 
 340 V B 0.817453 0.169897 0.012651 -> 0.817453 
 341 Y B 0.634400 0.354272 0.011328 -> 0.634400 
 342 D E 0.009492 0.166879 0.823629 -> 0.823629 
 343 R M 0.106716 0.619318 0.273966 -> 0.619318 
 344 M B 0.844554 0.148590 0.006856 -> 0.844554 
 345 V B 0.951210 0.040128 0.008662 -> 0.951210 
 346 S B 0.750387 0.227791 0.021821 -> 0.750387 
 347 L B 0.939381 0.054504 0.006115 -> 0.939381 
 348 P B 0.826582 0.160783 0.012635 -> 0.826582 
 349 V B 0.870325 0.121564 0.008111 -> 0.870325 
 350 G B 0.592480 0.366535 0.040985 -> 0.592480 
 351 W M 0.090598 0.529830 0.379571 -> 0.529830 
 352 W E 0.032559 0.330549 0.636892 -> 0.636892 
 353 L B 0.656673 0.327645 0.015681 -> 0.656673 
 354 T E 0.026010 0.449515 0.524475 -> 0.524475 
 355 E E 0.004560 0.208774 0.786666 -> 0.786666 
 356 Q E 0.007013 0.216970 0.776018 -> 0.776018 
 357 D M 0.335786 0.584335 0.079879 -> 0.584335 
 358 R M 0.367970 0.577584 0.054446 -> 0.577584 
 359 E E 0.040311 0.456588 0.503101 -> 0.503101 
 360 H M 0.073423 0.675156 0.251420 -> 0.675156 
 361 V B 0.980253 0.016479 0.003267 -> 0.980253 
 362 V B 0.808668 0.180533 0.010798 -> 0.808668 
 363 A E 0.021373 0.208928 0.769699 -> 0.769699 
 364 T M 0.352626 0.593298 0.054076 -> 0.593298 
 365 I B 0.884314 0.103169 0.012517 -> 0.884314 
 366 R E 0.020287 0.387744 0.591969 -> 0.591969 
 367 S E 0.040523 0.236251 0.723226 -> 0.723226 
 368 G M 0.237698 0.394380 0.367922 -> 0.394380 
 369 W M 0.215019 0.612140 0.172841 -> 0.612140 
