# Supplementary material for: AcconPred: Predicting Solvent Accessibility and Contact Number Simultaneously by a Multitask Learning Framework under the Conditional Neural Fields Model
Source: Biomed Res Int. 2015 Aug 3;2015:678764. doi: 10.1155/2015/678764 (PMC4538422; doi:10.1155/2015/678764)
Supplement: Supplementary file 1 — Training/testing dataset as well as the CASP11 evaluation dataset could be found in the Supplementary Material. The CASP11 evaluation dataset contains all detailed results from SPINE-X, SANN, ACCpro5 and AcconPred. [file 678764.f1.zip › Supplmentary_Files/105_casp11_domain/casp11_domain_AcconPred/T0845-D1.reso]

# AcconPred: three-state solvent accessibility prediction results 
# probabilities are in the order of B (Bury, pACC: 0-10), M (Medium, pACC: 11-40) and E (Exposed, pACC: 41-100), 
# where pACC is the relative solvent accessibility value calculated by DSSP 
# output format: <position> <one letter amino acid> <predicted label> ... <probabilities> ... -> <maximal probability> 

 1 D E 0.004361 0.043608 0.952032 -> 0.952032 
 2 D E 0.009471 0.138014 0.852516 -> 0.852516 
 3 C M 0.142937 0.459774 0.397289 -> 0.459774 
 4 E E 0.009835 0.159625 0.830540 -> 0.830540 
 5 D E 0.025771 0.206372 0.767857 -> 0.767857 
 6 L M 0.137355 0.451230 0.411415 -> 0.451230 
 7 H E 0.033410 0.270460 0.696131 -> 0.696131 
 8 L E 0.242710 0.376304 0.380986 -> 0.380986 
 9 G E 0.057345 0.300015 0.642640 -> 0.642640 
 10 N E 0.012616 0.122171 0.865213 -> 0.865213 
 11 L B 0.458986 0.442480 0.098534 -> 0.458986 
 12 A E 0.144981 0.347759 0.507260 -> 0.507260 
 13 H M 0.219111 0.435319 0.345570 -> 0.435319 
 14 Y M 0.127728 0.590582 0.281690 -> 0.590582 
 15 P B 0.596604 0.315642 0.087755 -> 0.596604 
 16 N E 0.071308 0.336500 0.592192 -> 0.592192 
 17 V M 0.295211 0.563694 0.141095 -> 0.563694 
 18 L M 0.255059 0.621325 0.123616 -> 0.621325 
 19 K E 0.009356 0.171631 0.819013 -> 0.819013 
 20 G B 0.464077 0.445287 0.090637 -> 0.464077 
 21 T E 0.018774 0.265038 0.716187 -> 0.716187 
 22 F B 0.729420 0.244647 0.025933 -> 0.729420 
 23 P E 0.043964 0.431548 0.524488 -> 0.524488 
 24 T E 0.067867 0.341432 0.590701 -> 0.590701 
 25 E E 0.004181 0.101249 0.894571 -> 0.894571 
 26 S E 0.025805 0.210255 0.763940 -> 0.763940 
 27 Q M 0.122752 0.624536 0.252712 -> 0.624536 
 28 V E 0.058412 0.381429 0.560158 -> 0.560158 
 29 L B 0.729683 0.263269 0.007048 -> 0.729683 
 30 E E 0.017994 0.335545 0.646460 -> 0.646460 
 31 L M 0.183967 0.559876 0.256157 -> 0.559876 
 32 G E 0.011000 0.122366 0.866634 -> 0.866634 
 33 E E 0.026167 0.442116 0.531717 -> 0.531717 
 34 T E 0.007747 0.177819 0.814434 -> 0.814434 
 35 L B 0.778517 0.210718 0.010765 -> 0.778517 
 36 E E 0.030443 0.458158 0.511399 -> 0.511399 
 37 I B 0.956471 0.042130 0.001400 -> 0.956471 
 38 T M 0.035745 0.615350 0.348904 -> 0.615350 
 39 P B 0.716301 0.265148 0.018551 -> 0.716301 
 40 E E 0.012576 0.311073 0.676352 -> 0.676352 
 41 L B 0.552949 0.412190 0.034861 -> 0.552949 
 42 L E 0.055140 0.437247 0.507612 -> 0.507612 
 43 N M 0.152921 0.516220 0.330859 -> 0.516220 
 44 P E 0.044413 0.270433 0.685154 -> 0.685154 
 45 E E 0.004742 0.100436 0.894822 -> 0.894822 
 46 G E 0.088982 0.377873 0.533145 -> 0.533145 
 47 A B 0.580967 0.365692 0.053342 -> 0.580967 
 48 T M 0.206537 0.582088 0.211375 -> 0.582088 
 49 Y B 0.619806 0.370007 0.010187 -> 0.619806 
 50 S M 0.346050 0.593883 0.060067 -> 0.593883 
 51 W B 0.923967 0.073933 0.002100 -> 0.923967 
 52 L M 0.049123 0.727221 0.223656 -> 0.727221 
 53 V B 0.870320 0.121575 0.008104 -> 0.870320 
 54 N E 0.004865 0.150574 0.844561 -> 0.844561 
 55 G E 0.014847 0.178920 0.806234 -> 0.806234 
 56 K E 0.001632 0.072644 0.925724 -> 0.925724 
 57 E E 0.015071 0.223759 0.761170 -> 0.761170 
 58 Y E 0.049135 0.386141 0.564724 -> 0.564724 
 59 S M 0.400504 0.478950 0.120545 -> 0.478950 
 60 T E 0.022934 0.189725 0.787341 -> 0.787341 
 61 E E 0.015996 0.251474 0.732530 -> 0.732530 
 62 P E 0.022565 0.278510 0.698925 -> 0.698925 
 63 T E 0.016795 0.241724 0.741480 -> 0.741480 
 64 F M 0.472247 0.504771 0.022982 -> 0.504771 
 65 S E 0.011970 0.232803 0.755226 -> 0.755226 
 66 Y B 0.550822 0.439057 0.010121 -> 0.550822 
 67 K E 0.003152 0.283007 0.713841 -> 0.713841 
 68 I B 0.661542 0.309984 0.028474 -> 0.661542 
 69 D E 0.003887 0.136996 0.859116 -> 0.859116 
 70 N E 0.021035 0.292407 0.686558 -> 0.686558 
 71 P E 0.013030 0.212715 0.774254 -> 0.774254 
 72 C M 0.383716 0.529988 0.086296 -> 0.529988 
 73 R E 0.005494 0.252975 0.741532 -> 0.741532 
 74 A B 0.757554 0.237979 0.004467 -> 0.757554 
 75 D M 0.012184 0.540531 0.447285 -> 0.540531 
 76 L B 0.932223 0.065862 0.001916 -> 0.932223 
 77 S M 0.105054 0.700264 0.194682 -> 0.700264 
 78 C B 0.986897 0.012717 0.000386 -> 0.986897 
 79 I M 0.126345 0.813486 0.060169 -> 0.813486 
 80 I B 0.961023 0.038563 0.000413 -> 0.961023 
 81 K E 0.009723 0.465975 0.524303 -> 0.524303 
 82 N B 0.698819 0.276860 0.024321 -> 0.698819 
 83 K E 0.001818 0.068762 0.929420 -> 0.929420 
 84 Y E 0.014760 0.185839 0.799401 -> 0.799401 
 85 G M 0.372255 0.452690 0.175055 -> 0.452690 
 86 K E 0.009126 0.140569 0.850305 -> 0.850305 
 87 V M 0.230815 0.606645 0.162541 -> 0.606645 
 88 E E 0.008756 0.211189 0.780056 -> 0.780056 
 89 M M 0.241780 0.578492 0.179728 -> 0.578492 
 90 S E 0.046306 0.388485 0.565210 -> 0.565210 
 91 T M 0.204532 0.585000 0.210468 -> 0.585000 
 92 S E 0.126794 0.413474 0.459732 -> 0.459732 
 93 F B 0.677979 0.254937 0.067084 -> 0.677979 
 94 S E 0.090339 0.435684 0.473978 -> 0.473978 
 95 S B 0.495414 0.311110 0.193477 -> 0.495414 
 96 N E 0.025323 0.238794 0.735884 -> 0.735884 
 97 H E 0.003438 0.057817 0.938745 -> 0.938745 
