# Supplementary material for: AcconPred: Predicting Solvent Accessibility and Contact Number Simultaneously by a Multitask Learning Framework under the Conditional Neural Fields Model
Source: Biomed Res Int. 2015 Aug 3;2015:678764. doi: 10.1155/2015/678764 (PMC4538422; doi:10.1155/2015/678764)
Supplement: Supplementary file 1 — Training/testing dataset as well as the CASP11 evaluation dataset could be found in the Supplementary Material. The CASP11 evaluation dataset contains all detailed results from SPINE-X, SANN, ACCpro5 and AcconPred. [file 678764.f1.zip › Supplmentary_Files/105_casp11_domain/casp11_domain_AcconPred/T0845-D2.reso]

# AcconPred: three-state solvent accessibility prediction results 
# probabilities are in the order of B (Bury, pACC: 0-10), M (Medium, pACC: 11-40) and E (Exposed, pACC: 41-100), 
# where pACC is the relative solvent accessibility value calculated by DSSP 
# output format: <position> <one letter amino acid> <predicted label> ... <probabilities> ... -> <maximal probability> 

 1 N E 0.000777 0.019417 0.979806 -> 0.979806 
 2 F M 0.104745 0.526209 0.369046 -> 0.526209 
 3 S E 0.197284 0.396556 0.406160 -> 0.406160 
 4 K E 0.076775 0.288205 0.635020 -> 0.635020 
 5 G B 0.375651 0.370725 0.253624 -> 0.375651 
 6 F M 0.142756 0.455943 0.401301 -> 0.455943 
 7 F B 0.661255 0.268447 0.070298 -> 0.661255 
 8 Y M 0.146174 0.461735 0.392091 -> 0.461735 
 9 V B 0.422043 0.391745 0.186212 -> 0.422043 
 10 A M 0.303002 0.429476 0.267522 -> 0.429476 
 11 D E 0.078209 0.363968 0.557823 -> 0.557823 
 12 G B 0.790346 0.188893 0.020761 -> 0.790346 
 13 T B 0.507148 0.427821 0.065031 -> 0.507148 
 14 F B 0.938437 0.060487 0.001076 -> 0.938437 
 15 N B 0.629536 0.327660 0.042804 -> 0.629536 
 16 F B 0.742478 0.240670 0.016852 -> 0.742478 
 17 Y B 0.652708 0.327810 0.019482 -> 0.652708 
 18 D B 0.669149 0.307294 0.023557 -> 0.669149 
 19 T M 0.126935 0.501327 0.371738 -> 0.501327 
 20 E E 0.002498 0.095065 0.902437 -> 0.902437 
 21 K E 0.007154 0.147523 0.845323 -> 0.845323 
 22 K E 0.013820 0.150895 0.835286 -> 0.835286 
 23 T M 0.216895 0.561905 0.221200 -> 0.561905 
 24 A B 0.530820 0.378295 0.090885 -> 0.530820 
 25 Y M 0.092243 0.681944 0.225814 -> 0.681944 
 26 Q M 0.189033 0.510537 0.300430 -> 0.510537 
 27 D M 0.314601 0.559041 0.126358 -> 0.559041 
 28 C B 0.957267 0.038046 0.004687 -> 0.957267 
 29 Y B 0.742480 0.220374 0.037145 -> 0.742480 
 30 A M 0.282882 0.469991 0.247128 -> 0.469991 
 31 S E 0.113154 0.381854 0.504993 -> 0.504993 
 32 L M 0.143139 0.546059 0.310802 -> 0.546059 
 33 N B 0.612782 0.345492 0.041726 -> 0.612782 
 34 A E 0.019251 0.084643 0.896107 -> 0.896107 
 35 G E 0.031533 0.143832 0.824635 -> 0.824635 
 36 K E 0.026347 0.350574 0.623079 -> 0.623079 
 37 T E 0.058948 0.338757 0.602294 -> 0.602294 
 38 L B 0.701344 0.273846 0.024810 -> 0.701344 
 39 G B 0.403564 0.352055 0.244381 -> 0.403564 
 40 I E 0.206223 0.392127 0.401650 -> 0.401650 
 41 G B 0.421261 0.327668 0.251071 -> 0.421261 
 42 N B 0.520395 0.298892 0.180713 -> 0.520395 
 43 Y M 0.398462 0.516754 0.084783 -> 0.516754 
 44 D B 0.639175 0.296098 0.064727 -> 0.639175 
 45 S B 0.898223 0.095102 0.006675 -> 0.898223 
 46 A B 0.920804 0.074210 0.004986 -> 0.920804 
 47 N B 0.823453 0.169745 0.006802 -> 0.823453 
 48 I B 0.957979 0.040654 0.001368 -> 0.957979 
 49 I B 0.798757 0.193969 0.007274 -> 0.798757 
 50 H M 0.485387 0.493859 0.020754 -> 0.493859 
 51 S B 0.507926 0.437863 0.054211 -> 0.507926 
 52 N E 0.022228 0.209534 0.768238 -> 0.768238 
 53 G E 0.120238 0.350480 0.529282 -> 0.529282 
 54 K M 0.154401 0.722212 0.123387 -> 0.722212 
 55 F B 0.942303 0.056528 0.001169 -> 0.942303 
 56 Y B 0.794849 0.203733 0.001418 -> 0.794849 
 57 L B 0.988563 0.010824 0.000614 -> 0.988563 
 58 L B 0.981052 0.017228 0.001720 -> 0.981052 
 59 V B 0.993213 0.006224 0.000562 -> 0.993213 
 60 G B 0.694174 0.286894 0.018932 -> 0.694174 
 61 T M 0.418785 0.485326 0.095889 -> 0.485326 
 62 S M 0.356997 0.391827 0.251177 -> 0.391827 
 63 T E 0.131549 0.379801 0.488651 -> 0.488651 
 64 S E 0.058012 0.300499 0.641489 -> 0.641489 
 65 N E 0.206412 0.366223 0.427365 -> 0.427365 
 66 R E 0.058724 0.348045 0.593230 -> 0.593230 
 67 D E 0.081085 0.423610 0.495305 -> 0.495305 
 68 H M 0.214079 0.711283 0.074638 -> 0.711283 
 69 F B 0.965807 0.032714 0.001478 -> 0.965807 
 70 Y M 0.391406 0.576839 0.031755 -> 0.576839 
 71 I B 0.826817 0.168048 0.005135 -> 0.826817 
 72 V B 0.810755 0.173738 0.015507 -> 0.810755 
 73 D M 0.448685 0.485349 0.065966 -> 0.485349 
 74 A M 0.289376 0.399428 0.311195 -> 0.399428 
 75 K E 0.003619 0.149101 0.847280 -> 0.847280 
 76 T E 0.204707 0.358714 0.436579 -> 0.436579 
 77 L B 0.595424 0.373589 0.030987 -> 0.595424 
 78 Y E 0.062953 0.438784 0.498263 -> 0.498263 
 79 Y M 0.060535 0.651428 0.288038 -> 0.651428 
 80 E E 0.007071 0.172034 0.820895 -> 0.820895 
 81 N M 0.144621 0.521119 0.334261 -> 0.521119 
 82 S E 0.034266 0.268207 0.697527 -> 0.697527 
 83 A M 0.187162 0.434436 0.378402 -> 0.434436 
 84 V E 0.044724 0.282040 0.673235 -> 0.673235 
 85 V E 0.109301 0.353473 0.537225 -> 0.537225 
 86 G E 0.129976 0.350591 0.519433 -> 0.519433 
 87 A M 0.225999 0.388409 0.385592 -> 0.388409 
 88 N E 0.212745 0.392095 0.395160 -> 0.395160 
 89 L B 0.700018 0.266343 0.033639 -> 0.700018 
 90 S B 0.395142 0.343473 0.261385 -> 0.395142 
 91 G B 0.655750 0.312075 0.032175 -> 0.655750 
 92 L B 0.943814 0.052685 0.003500 -> 0.943814 
 93 T B 0.830915 0.158710 0.010375 -> 0.830915 
 94 I B 0.754867 0.231004 0.014129 -> 0.754867 
 95 L B 0.667313 0.315079 0.017608 -> 0.667313 
 96 N M 0.145782 0.535618 0.318599 -> 0.535618 
 97 E E 0.009902 0.182961 0.807137 -> 0.807137 
 98 Q E 0.046152 0.458229 0.495620 -> 0.495620 
 99 Y M 0.281694 0.685851 0.032455 -> 0.685851 
 100 G B 0.967646 0.031653 0.000701 -> 0.967646 
 101 L B 0.908813 0.089808 0.001379 -> 0.908813 
 102 V B 0.982715 0.013912 0.003373 -> 0.982715 
 103 T B 0.869866 0.121755 0.008379 -> 0.869866 
 104 G B 0.588694 0.367457 0.043849 -> 0.588694 
 105 D M 0.268857 0.483888 0.247254 -> 0.483888 
 106 G B 0.679078 0.293560 0.027362 -> 0.679078 
 107 I B 0.914117 0.081469 0.004414 -> 0.914117 
 108 R M 0.411531 0.559716 0.028753 -> 0.559716 
 109 R M 0.188771 0.736665 0.074564 -> 0.736665 
 110 I B 0.967443 0.031168 0.001389 -> 0.967443 
 111 D M 0.389819 0.546595 0.063586 -> 0.546595 
 112 L B 0.858918 0.128289 0.012793 -> 0.858918 
 113 K E 0.008193 0.222748 0.769059 -> 0.769059 
 114 S E 0.292777 0.289225 0.417998 -> 0.417998 
 115 L B 0.493122 0.445395 0.061483 -> 0.493122 
 116 N E 0.078211 0.383634 0.538155 -> 0.538155 
 117 N M 0.159059 0.502666 0.338275 -> 0.502666 
 118 V M 0.267589 0.415007 0.317403 -> 0.415007 
 119 R E 0.023489 0.371329 0.605182 -> 0.605182 
 120 I M 0.198980 0.562206 0.238815 -> 0.562206 
 121 K E 0.021925 0.267745 0.710330 -> 0.710330 
 122 N M 0.180488 0.447668 0.371845 -> 0.447668 
 123 E E 0.026546 0.250297 0.723157 -> 0.723157 
 124 R E 0.057972 0.352331 0.589698 -> 0.589698 
 125 L E 0.097165 0.371613 0.531222 -> 0.531222 
 126 L E 0.117280 0.376687 0.506032 -> 0.506032 
 127 C M 0.230368 0.452542 0.317090 -> 0.452542 
 128 F M 0.182631 0.479124 0.338244 -> 0.479124 
 129 Y M 0.145725 0.456660 0.397615 -> 0.456660 
 130 N M 0.326645 0.512763 0.160592 -> 0.512763 
 131 S B 0.797242 0.183483 0.019275 -> 0.797242 
 132 I B 0.799643 0.174368 0.025989 -> 0.799643 
 133 I B 0.601142 0.351760 0.047099 -> 0.601142 
 134 Y M 0.366055 0.510270 0.123675 -> 0.510270 
 135 N E 0.090798 0.319637 0.589565 -> 0.589565 
 136 G M 0.213868 0.498314 0.287818 -> 0.498314 
 137 K M 0.172461 0.663224 0.164315 -> 0.663224 
 138 V B 0.910367 0.085449 0.004184 -> 0.910367 
 139 L B 0.773249 0.218872 0.007880 -> 0.773249 
 140 S B 0.970498 0.025608 0.003895 -> 0.970498 
 141 N B 0.909187 0.082637 0.008176 -> 0.909187 
 142 D B 0.835927 0.146520 0.017554 -> 0.835927 
 143 T B 0.642432 0.306269 0.051299 -> 0.642432 
 144 Y M 0.369565 0.561875 0.068561 -> 0.561875 
 145 K E 0.019344 0.340022 0.640634 -> 0.640634 
 146 D E 0.110554 0.415482 0.473963 -> 0.473963 
 147 E E 0.010564 0.145311 0.844125 -> 0.844125 
 148 S E 0.085270 0.350767 0.563963 -> 0.563963 
 149 K M 0.089971 0.532568 0.377460 -> 0.532568 
 150 V B 0.873029 0.122716 0.004255 -> 0.873029 
 151 K M 0.470490 0.491909 0.037601 -> 0.491909 
 152 Y B 0.614448 0.374686 0.010866 -> 0.614448 
 153 Y B 0.788905 0.200574 0.010521 -> 0.788905 
 154 D B 0.574681 0.358863 0.066456 -> 0.574681 
 155 V B 0.614602 0.323298 0.062100 -> 0.614602 
 156 N E 0.125212 0.406161 0.468628 -> 0.468628 
 157 E E 0.040565 0.378285 0.581150 -> 0.581150 
 158 L B 0.460133 0.448126 0.091740 -> 0.460133 
 159 I M 0.091677 0.531289 0.377034 -> 0.531289 
 160 A E 0.101192 0.395426 0.503382 -> 0.503382 
 161 A M 0.145324 0.540488 0.314188 -> 0.540488 
 162 K E 0.020641 0.342191 0.637168 -> 0.637168 
 163 E E 0.015405 0.136090 0.848505 -> 0.848505 
 164 G M 0.150534 0.446496 0.402970 -> 0.446496 
 165 E E 0.014717 0.155047 0.830236 -> 0.830236 
 166 A M 0.286740 0.447302 0.265958 -> 0.447302 
 167 P E 0.053458 0.254763 0.691779 -> 0.691779 
 168 A E 0.074281 0.277574 0.648145 -> 0.648145 
 169 V M 0.154363 0.498025 0.347612 -> 0.498025 
 170 T M 0.117347 0.481492 0.401161 -> 0.481492 
 171 E E 0.007919 0.181356 0.810725 -> 0.810725 
 172 L M 0.283377 0.581455 0.135168 -> 0.581455 
 173 D M 0.073465 0.499046 0.427489 -> 0.499046 
 174 I M 0.196389 0.514681 0.288931 -> 0.514681 
 175 I B 0.569477 0.371333 0.059190 -> 0.569477 
 176 Q E 0.062431 0.392373 0.545196 -> 0.545196 
 177 K E 0.017569 0.242235 0.740196 -> 0.740196 
 178 Q M 0.166495 0.472458 0.361047 -> 0.472458 
 179 K E 0.050524 0.364861 0.584614 -> 0.584614 
 180 I B 0.590348 0.378796 0.030856 -> 0.590348 
 181 N B 0.652678 0.329614 0.017707 -> 0.652678 
 182 F B 0.922946 0.075335 0.001719 -> 0.922946 
 183 V B 0.826750 0.167428 0.005822 -> 0.826750 
 184 L B 0.820224 0.173297 0.006479 -> 0.820224 
 185 A B 0.908596 0.087557 0.003848 -> 0.908596 
 186 K E 0.019555 0.301033 0.679413 -> 0.679413 
 187 D E 0.019932 0.213193 0.766875 -> 0.766875 
 188 G M 0.457956 0.468114 0.073929 -> 0.468114 
 189 N M 0.138110 0.552083 0.309808 -> 0.552083 
 190 V B 0.925350 0.072271 0.002379 -> 0.925350 
 191 Y B 0.571980 0.410485 0.017535 -> 0.571980 
 192 T B 0.799955 0.182720 0.017325 -> 0.799955 
 193 L B 0.829515 0.156494 0.013991 -> 0.829515 
 194 E M 0.265390 0.528907 0.205703 -> 0.528907 
 195 S M 0.363818 0.470357 0.165825 -> 0.470357 
 196 A M 0.340413 0.453835 0.205752 -> 0.453835 
 197 D E 0.032855 0.187369 0.779776 -> 0.779776 
 198 N E 0.052435 0.288497 0.659068 -> 0.659068 
 199 G E 0.182350 0.362732 0.454918 -> 0.454918 
 200 C B 0.475019 0.409070 0.115911 -> 0.475019 
 201 N M 0.400643 0.511905 0.087452 -> 0.511905 
 202 I B 0.730277 0.257900 0.011824 -> 0.730277 
 203 V B 0.552419 0.399689 0.047892 -> 0.552419 
 204 K M 0.137078 0.589005 0.273918 -> 0.589005 
 205 I B 0.751724 0.228490 0.019786 -> 0.751724 
 206 K M 0.079897 0.582311 0.337792 -> 0.582311 
 207 N E 0.072934 0.250929 0.676137 -> 0.676137 
 208 D E 0.022888 0.218101 0.759011 -> 0.759011 
 209 F M 0.249159 0.569582 0.181259 -> 0.569582 
 210 T E 0.051842 0.374863 0.573296 -> 0.573296 
 211 L M 0.272995 0.620146 0.106859 -> 0.620146 
 212 E E 0.030934 0.348131 0.620936 -> 0.620936 
 213 K E 0.013948 0.213487 0.772566 -> 0.772566 
 214 V M 0.241497 0.568940 0.189562 -> 0.568940 
 215 F M 0.232178 0.527842 0.239980 -> 0.527842 
 216 A B 0.429078 0.394827 0.176095 -> 0.429078 
 217 N E 0.058669 0.313613 0.627718 -> 0.627718 
 218 F B 0.556774 0.357385 0.085841 -> 0.556774 
 219 Q E 0.070430 0.371721 0.557850 -> 0.557850 
 220 P E 0.160893 0.339654 0.499453 -> 0.499453 
 221 A E 0.266627 0.313482 0.419891 -> 0.419891 
 222 K E 0.054871 0.322168 0.622961 -> 0.622961 
 223 G B 0.611116 0.281001 0.107883 -> 0.611116 
 224 P B 0.596081 0.226851 0.177068 -> 0.596081 
 225 Y B 0.465686 0.412809 0.121506 -> 0.465686 
 226 H B 0.404879 0.373790 0.221330 -> 0.404879 
 227 S B 0.602436 0.234929 0.162635 -> 0.602436 
 228 S B 0.472994 0.354179 0.172827 -> 0.472994 
 229 P M 0.333050 0.428576 0.238374 -> 0.428576 
 230 T B 0.531489 0.353121 0.115390 -> 0.531489 
 231 I B 0.804036 0.175999 0.019965 -> 0.804036 
 232 G B 0.884344 0.108435 0.007221 -> 0.884344 
 233 M B 0.959283 0.038286 0.002430 -> 0.959283 
 234 V B 0.929474 0.067689 0.002837 -> 0.929474 
 235 A B 0.924275 0.069170 0.006555 -> 0.924275 
 236 S B 0.883310 0.111431 0.005259 -> 0.883310 
 237 E M 0.352341 0.470735 0.176924 -> 0.470735 
 238 T M 0.152746 0.529545 0.317709 -> 0.529545 
 239 E M 0.120885 0.519231 0.359885 -> 0.519231 
 240 N M 0.307887 0.589709 0.102404 -> 0.589709 
 241 I B 0.753026 0.236206 0.010767 -> 0.753026 
 242 I B 0.965374 0.033169 0.001457 -> 0.965374 
 243 Y B 0.864002 0.129908 0.006090 -> 0.864002 
 244 L B 0.955144 0.042478 0.002379 -> 0.955144 
 245 V B 0.957362 0.039366 0.003272 -> 0.957362 
 246 S B 0.724384 0.245866 0.029750 -> 0.724384 
 247 T M 0.324089 0.412218 0.263693 -> 0.412218 
 248 D E 0.060253 0.234608 0.705139 -> 0.705139 
 249 G M 0.354463 0.526641 0.118896 -> 0.526641 
 250 A M 0.397297 0.518418 0.084285 -> 0.518418 
 251 I B 0.900006 0.095243 0.004752 -> 0.900006 
 252 Y B 0.565619 0.413085 0.021296 -> 0.565619 
 253 K M 0.208556 0.585399 0.206045 -> 0.585399 
 254 Y B 0.642339 0.332997 0.024664 -> 0.642339 
 255 I M 0.290349 0.595844 0.113806 -> 0.595844 
 256 L B 0.689730 0.267395 0.042874 -> 0.689730 
 257 G E 0.027561 0.290531 0.681908 -> 0.681908 
 258 D E 0.026157 0.237635 0.736208 -> 0.736208 
 259 S E 0.036962 0.320616 0.642422 -> 0.642422 
 260 D E 0.023881 0.206731 0.769388 -> 0.769388 
 261 S M 0.295544 0.481203 0.223253 -> 0.481203 
 262 L M 0.172121 0.512932 0.314948 -> 0.512932 
 263 K E 0.004244 0.127320 0.868435 -> 0.868435 
 264 A E 0.202864 0.396790 0.400346 -> 0.400346 
 265 P M 0.346112 0.423334 0.230554 -> 0.423334 
 266 F M 0.360471 0.385248 0.254281 -> 0.385248 
 267 I B 0.649076 0.299208 0.051716 -> 0.649076 
 268 A E 0.212550 0.383746 0.403705 -> 0.403705 
 269 A M 0.412877 0.436270 0.150853 -> 0.436270 
 270 E E 0.027862 0.272712 0.699426 -> 0.699426 
 271 S E 0.056454 0.264782 0.678763 -> 0.678763 
 272 G E 0.029308 0.210192 0.760500 -> 0.760500 
 273 V M 0.384283 0.464409 0.151308 -> 0.464409 
 274 S M 0.277597 0.456465 0.265938 -> 0.456465 
 275 I B 0.609768 0.364696 0.025536 -> 0.609768 
 276 T B 0.814038 0.168732 0.017230 -> 0.814038 
 277 A B 0.891563 0.103486 0.004951 -> 0.891563 
 278 P B 0.907462 0.085567 0.006971 -> 0.907462 
 279 L B 0.946592 0.051864 0.001543 -> 0.946592 
 280 Q B 0.486081 0.449085 0.064833 -> 0.486081 
 281 L B 0.950143 0.048880 0.000976 -> 0.950143 
 282 N B 0.498546 0.466920 0.034535 -> 0.498546 
 283 Q M 0.310717 0.419687 0.269596 -> 0.419687 
 284 Q E 0.041264 0.413301 0.545435 -> 0.545435 
 285 S E 0.073671 0.295003 0.631326 -> 0.631326 
 286 G M 0.137253 0.445514 0.417233 -> 0.445514 
 287 E M 0.091822 0.722967 0.185211 -> 0.722967 
 288 L B 0.985314 0.014032 0.000654 -> 0.985314 
 289 Y B 0.770383 0.227530 0.002087 -> 0.770383 
 290 V B 0.995317 0.004426 0.000257 -> 0.995317 
 291 T B 0.965377 0.029569 0.005054 -> 0.965377 
 292 Y B 0.535950 0.444574 0.019476 -> 0.535950 
 293 T B 0.798851 0.180613 0.020536 -> 0.798851 
 294 E E 0.034440 0.386918 0.578643 -> 0.578643 
 295 E E 0.058547 0.439037 0.502416 -> 0.502416 
 296 R M 0.374055 0.490003 0.135942 -> 0.490003 
 297 K E 0.035034 0.221972 0.742994 -> 0.742994 
 298 D E 0.070144 0.331191 0.598665 -> 0.598665 
 299 E E 0.042656 0.312526 0.644818 -> 0.644818 
 300 S B 0.619127 0.322331 0.058542 -> 0.619127 
 301 K M 0.072083 0.733578 0.194339 -> 0.733578 
 302 I B 0.966347 0.032994 0.000659 -> 0.966347 
 303 V B 0.666232 0.316561 0.017207 -> 0.666232 
 304 V B 0.646031 0.339255 0.014714 -> 0.646031 
 305 Y B 0.785322 0.198984 0.015694 -> 0.785322 
 306 S M 0.273646 0.638907 0.087446 -> 0.638907 
 307 K E 0.011357 0.197139 0.791504 -> 0.791504 
 308 D E 0.003527 0.064153 0.932321 -> 0.932321 
 309 G M 0.192291 0.505735 0.301973 -> 0.505735 
 310 K E 0.008480 0.111600 0.879920 -> 0.879920 
 311 V M 0.166201 0.670570 0.163230 -> 0.670570 
 312 L M 0.057985 0.555043 0.386972 -> 0.555043 
 313 H M 0.058899 0.579196 0.361905 -> 0.579196 
 314 T E 0.008815 0.155697 0.835488 -> 0.835488 
 315 V B 0.678983 0.308855 0.012162 -> 0.678983 
 316 D E 0.004319 0.157599 0.838082 -> 0.838082 
 317 C M 0.277131 0.490757 0.232113 -> 0.490757 
 318 G M 0.112035 0.456101 0.431864 -> 0.456101 
 319 E M 0.101700 0.478136 0.420164 -> 0.478136 
 320 S B 0.591917 0.346447 0.061637 -> 0.591917 
 321 V B 0.760889 0.227715 0.011396 -> 0.760889 
 322 P B 0.871940 0.113510 0.014550 -> 0.871940 
 323 S B 0.906370 0.085369 0.008262 -> 0.906370 
 324 Q B 0.525761 0.417940 0.056298 -> 0.525761 
 325 I B 0.865291 0.111342 0.023368 -> 0.865291 
 326 L B 0.702178 0.276051 0.021772 -> 0.702178 
 327 F B 0.716493 0.247257 0.036250 -> 0.716493 
 328 N M 0.226602 0.560828 0.212570 -> 0.560828 
 329 N E 0.007640 0.123687 0.868673 -> 0.868673 
