# Supplementary material for: AcconPred: Predicting Solvent Accessibility and Contact Number Simultaneously by a Multitask Learning Framework under the Conditional Neural Fields Model
Source: Biomed Res Int. 2015 Aug 3;2015:678764. doi: 10.1155/2015/678764 (PMC4538422; doi:10.1155/2015/678764)
Supplement: Supplementary file 1 — Training/testing dataset as well as the CASP11 evaluation dataset could be found in the Supplementary Material. The CASP11 evaluation dataset contains all detailed results from SPINE-X, SANN, ACCpro5 and AcconPred. [file 678764.f1.zip › Supplmentary_Files/105_casp11_domain/casp11_domain_AcconPred/T0847-D1.reso]

# AcconPred: three-state solvent accessibility prediction results 
# probabilities are in the order of B (Bury, pACC: 0-10), M (Medium, pACC: 11-40) and E (Exposed, pACC: 41-100), 
# where pACC is the relative solvent accessibility value calculated by DSSP 
# output format: <position> <one letter amino acid> <predicted label> ... <probabilities> ... -> <maximal probability> 

 1 S E 0.002196 0.029983 0.967822 -> 0.967822 
 2 A M 0.108824 0.551079 0.340097 -> 0.551079 
 3 T E 0.022504 0.313217 0.664279 -> 0.664279 
 4 V B 0.483478 0.419741 0.096781 -> 0.483478 
 5 Y M 0.150302 0.713906 0.135792 -> 0.713906 
 6 F B 0.746080 0.234249 0.019671 -> 0.746080 
 7 Q M 0.319360 0.534901 0.145739 -> 0.534901 
 8 T M 0.115449 0.461985 0.422566 -> 0.461985 
 9 V E 0.053679 0.387060 0.559261 -> 0.559261 
 10 K E 0.001691 0.086944 0.911365 -> 0.911365 
 11 H E 0.038008 0.444761 0.517231 -> 0.517231 
 12 N E 0.021629 0.262272 0.716099 -> 0.716099 
 13 N E 0.011886 0.294493 0.693621 -> 0.693621 
 14 I B 0.896925 0.092894 0.010181 -> 0.896925 
 15 R M 0.054938 0.736849 0.208213 -> 0.736849 
 16 D E 0.020354 0.276695 0.702951 -> 0.702951 
 17 L M 0.335260 0.639327 0.025412 -> 0.639327 
 18 V B 0.986380 0.011943 0.001677 -> 0.986380 
 19 R M 0.043785 0.786756 0.169458 -> 0.786756 
 20 R E 0.001759 0.140300 0.857941 -> 0.857941 
 21 C B 0.865430 0.132636 0.001934 -> 0.865430 
 22 I B 0.942815 0.054026 0.003159 -> 0.942815 
 23 T E 0.010393 0.103591 0.886016 -> 0.886016 
 24 R E 0.009356 0.236028 0.754616 -> 0.754616 
 25 T B 0.906039 0.087386 0.006575 -> 0.906039 
 26 S E 0.016099 0.343023 0.640879 -> 0.640879 
 27 Q E 0.006841 0.286310 0.706849 -> 0.706849 
 28 V M 0.241303 0.711092 0.047605 -> 0.711092 
 29 L B 0.988188 0.010320 0.001491 -> 0.988188 
 30 V B 0.647209 0.338992 0.013799 -> 0.647209 
 31 I B 0.982875 0.015155 0.001970 -> 0.982875 
 32 L B 0.911422 0.082445 0.006134 -> 0.911422 
 33 M B 0.903529 0.092292 0.004179 -> 0.903529 
 34 D B 0.718258 0.259358 0.022383 -> 0.718258 
 35 V B 0.571932 0.391834 0.036234 -> 0.571932 
 36 F B 0.933355 0.059306 0.007338 -> 0.933355 
 37 T M 0.248511 0.546220 0.205269 -> 0.546220 
 38 D M 0.148740 0.639924 0.211336 -> 0.639924 
 39 V M 0.132508 0.644219 0.223272 -> 0.644219 
 40 E E 0.013536 0.279210 0.707255 -> 0.707255 
 41 I B 0.795577 0.182532 0.021891 -> 0.795577 
 42 F B 0.957722 0.033640 0.008639 -> 0.957722 
 43 C M 0.172389 0.648913 0.178698 -> 0.648913 
 44 D M 0.060408 0.599406 0.340187 -> 0.599406 
 45 I B 0.972834 0.021342 0.005824 -> 0.972834 
 46 L B 0.785184 0.203195 0.011621 -> 0.785184 
 47 E E 0.006883 0.348799 0.644317 -> 0.644317 
 48 A M 0.395271 0.546701 0.058028 -> 0.546701 
 49 A B 0.824364 0.159149 0.016487 -> 0.824364 
 50 N E 0.021852 0.287744 0.690405 -> 0.690405 
 51 K E 0.003213 0.067333 0.929454 -> 0.929454 
 52 R M 0.076748 0.612849 0.310404 -> 0.612849 
 53 G E 0.073901 0.290003 0.636096 -> 0.636096 
 54 V B 0.957892 0.040952 0.001155 -> 0.957892 
 55 F M 0.176532 0.686013 0.137455 -> 0.686013 
 56 V B 0.966910 0.031765 0.001325 -> 0.966910 
 57 C B 0.754439 0.242960 0.002600 -> 0.754439 
 58 V B 0.967665 0.025051 0.007283 -> 0.967665 
 59 L B 0.970764 0.028219 0.001017 -> 0.970764 
 60 L B 0.939963 0.056989 0.003048 -> 0.939963 
 61 D B 0.632581 0.338648 0.028770 -> 0.632581 
 62 Q M 0.107640 0.446366 0.445994 -> 0.446366 
 63 G E 0.051889 0.269142 0.678969 -> 0.678969 
 64 G E 0.120962 0.332861 0.546178 -> 0.546178 
 65 V M 0.374132 0.489374 0.136494 -> 0.489374 
 66 K E 0.013816 0.140053 0.846130 -> 0.846130 
 67 L M 0.212490 0.431177 0.356333 -> 0.431177 
 68 F B 0.500923 0.395428 0.103649 -> 0.500923 
 69 Q M 0.108890 0.484100 0.407010 -> 0.484100 
 70 E E 0.028424 0.303414 0.668161 -> 0.668161 
 71 M B 0.552126 0.366277 0.081597 -> 0.552126 
 72 C B 0.735121 0.233685 0.031194 -> 0.735121 
 73 D E 0.028214 0.314972 0.656814 -> 0.656814 
 74 K E 0.005794 0.108258 0.885948 -> 0.885948 
 75 V M 0.257678 0.580086 0.162236 -> 0.580086 
 76 Q E 0.055339 0.259348 0.685313 -> 0.685313 
 77 I M 0.298855 0.481269 0.219876 -> 0.481269 
 78 S E 0.141156 0.418132 0.440712 -> 0.440712 
 79 D E 0.035869 0.253416 0.710715 -> 0.710715 
 80 S E 0.096210 0.341130 0.562660 -> 0.562660 
 81 H E 0.089531 0.437106 0.473363 -> 0.473363 
 82 L B 0.507817 0.371525 0.120658 -> 0.507817 
 83 K E 0.008874 0.102036 0.889090 -> 0.889090 
 84 N E 0.072889 0.278214 0.648897 -> 0.648897 
 85 I M 0.449612 0.499281 0.051107 -> 0.499281 
 86 S E 0.081121 0.348767 0.570112 -> 0.570112 
 87 I B 0.499667 0.442572 0.057761 -> 0.499667 
 88 R E 0.037658 0.458654 0.503688 -> 0.503688 
 89 S M 0.283182 0.509444 0.207374 -> 0.509444 
 90 V M 0.395984 0.419096 0.184920 -> 0.419096 
 91 E E 0.039104 0.291559 0.669337 -> 0.669337 
 92 G E 0.067358 0.242226 0.690416 -> 0.690416 
 93 E E 0.049345 0.385433 0.565222 -> 0.565222 
 94 I E 0.183729 0.397006 0.419266 -> 0.419266 
 95 Y M 0.302915 0.560424 0.136661 -> 0.560424 
 96 C M 0.422352 0.434923 0.142724 -> 0.434923 
 97 A B 0.582242 0.310952 0.106806 -> 0.582242 
 98 K E 0.072180 0.368307 0.559514 -> 0.559514 
 99 S E 0.077430 0.293311 0.629259 -> 0.629259 
 100 G E 0.148439 0.309883 0.541678 -> 0.541678 
 101 R E 0.067422 0.326399 0.606179 -> 0.606179 
 102 K E 0.019731 0.180653 0.799617 -> 0.799617 
 103 F M 0.224448 0.425275 0.350277 -> 0.425275 
 104 A E 0.167085 0.395399 0.437515 -> 0.437515 
 105 G E 0.152837 0.282564 0.564600 -> 0.564600 
 106 Q M 0.251610 0.599270 0.149121 -> 0.599270 
 107 I B 0.814485 0.155097 0.030418 -> 0.814485 
 108 R B 0.735642 0.228486 0.035872 -> 0.735642 
 109 E B 0.792902 0.185646 0.021452 -> 0.792902 
 110 K B 0.807284 0.174324 0.018392 -> 0.807284 
 111 F B 0.958519 0.040572 0.000909 -> 0.958519 
 112 I B 0.949986 0.048173 0.001842 -> 0.949986 
 113 I B 0.935591 0.059915 0.004495 -> 0.935591 
 114 S B 0.933783 0.063664 0.002553 -> 0.933783 
 115 D B 0.687876 0.295829 0.016295 -> 0.687876 
 116 W M 0.174938 0.541058 0.284004 -> 0.541058 
 117 R M 0.051876 0.691631 0.256493 -> 0.691631 
 118 F B 0.510136 0.469203 0.020660 -> 0.510136 
 119 V B 0.984582 0.014158 0.001260 -> 0.984582 
 120 L B 0.968101 0.030886 0.001013 -> 0.968101 
 121 S B 0.987724 0.010968 0.001309 -> 0.987724 
 122 G B 0.836122 0.148796 0.015082 -> 0.836122 
 123 S B 0.935352 0.058801 0.005847 -> 0.935352 
 124 Y B 0.766607 0.221655 0.011738 -> 0.766607 
 125 S B 0.770234 0.213598 0.016168 -> 0.770234 
 126 F B 0.914104 0.073723 0.012173 -> 0.914104 
 127 T B 0.628643 0.318405 0.052952 -> 0.628643 
 128 W M 0.225264 0.553984 0.220751 -> 0.553984 
 129 L M 0.326425 0.421400 0.252175 -> 0.421400 
 130 C B 0.697866 0.223202 0.078933 -> 0.697866 
 131 G B 0.494937 0.287903 0.217160 -> 0.494937 
 132 H M 0.262666 0.485534 0.251800 -> 0.485534 
 133 V B 0.441112 0.386460 0.172428 -> 0.441112 
 134 H B 0.667964 0.273068 0.058968 -> 0.667964 
 135 R M 0.236419 0.639369 0.124212 -> 0.639369 
 136 N B 0.746398 0.225359 0.028243 -> 0.746398 
 137 I B 0.892193 0.100007 0.007800 -> 0.892193 
 138 L B 0.967208 0.029846 0.002946 -> 0.967208 
 139 S B 0.887930 0.105270 0.006800 -> 0.887930 
 140 K M 0.391349 0.545197 0.063455 -> 0.545197 
 141 F B 0.599695 0.342750 0.057556 -> 0.599695 
 142 T M 0.062371 0.679958 0.257671 -> 0.679958 
 143 G E 0.029747 0.268916 0.701337 -> 0.701337 
 144 Q E 0.003670 0.105299 0.891031 -> 0.891031 
 145 A B 0.807744 0.169085 0.023171 -> 0.807744 
 146 V B 0.522904 0.445630 0.031467 -> 0.522904 
 147 E E 0.004853 0.120311 0.874836 -> 0.874836 
 148 L M 0.068376 0.704080 0.227544 -> 0.704080 
 149 F B 0.956779 0.038028 0.005193 -> 0.956779 
 150 D M 0.098696 0.787445 0.113859 -> 0.787445 
 151 E E 0.012879 0.210175 0.776945 -> 0.776945 
 152 E M 0.309574 0.621484 0.068942 -> 0.621484 
 153 F B 0.982356 0.008998 0.008646 -> 0.982356 
 154 R E 0.010500 0.374460 0.615040 -> 0.615040 
 155 H E 0.008475 0.319781 0.671744 -> 0.671744 
 156 L B 0.554822 0.401707 0.043472 -> 0.554822 
 157 Y B 0.509563 0.428898 0.061540 -> 0.509563 
 158 A E 0.030097 0.171401 0.798502 -> 0.798502 
 159 S E 0.069971 0.448643 0.481387 -> 0.481387 
 160 S B 0.596449 0.320731 0.082820 -> 0.596449 
 161 K E 0.003586 0.139692 0.856721 -> 0.856721 
 162 P E 0.030295 0.179680 0.790024 -> 0.790024 
 163 V M 0.326377 0.564910 0.108713 -> 0.564910 
 164 M E 0.034145 0.230527 0.735328 -> 0.735328 
 165 G M 0.179704 0.432719 0.387576 -> 0.432719 
 166 L E 0.086913 0.350930 0.562157 -> 0.562157 
 167 K E 0.005927 0.155024 0.839049 -> 0.839049 
 168 S E 0.024291 0.222223 0.753486 -> 0.753486 
 169 P E 0.026719 0.134997 0.838284 -> 0.838284 
