# Supplementary material for: AcconPred: Predicting Solvent Accessibility and Contact Number Simultaneously by a Multitask Learning Framework under the Conditional Neural Fields Model
Source: Biomed Res Int. 2015 Aug 3;2015:678764. doi: 10.1155/2015/678764 (PMC4538422; doi:10.1155/2015/678764)
Supplement: Supplementary file 1 — Training/testing dataset as well as the CASP11 evaluation dataset could be found in the Supplementary Material. The CASP11 evaluation dataset contains all detailed results from SPINE-X, SANN, ACCpro5 and AcconPred. [file 678764.f1.zip › Supplmentary_Files/105_casp11_domain/casp11_domain_AcconPred/T0848-D1.reso]

# AcconPred: three-state solvent accessibility prediction results 
# probabilities are in the order of B (Bury, pACC: 0-10), M (Medium, pACC: 11-40) and E (Exposed, pACC: 41-100), 
# where pACC is the relative solvent accessibility value calculated by DSSP 
# output format: <position> <one letter amino acid> <predicted label> ... <probabilities> ... -> <maximal probability> 

 1 S E 0.001916 0.024060 0.974024 -> 0.974024 
 2 E E 0.017539 0.182579 0.799882 -> 0.799882 
 3 T E 0.005984 0.086768 0.907248 -> 0.907248 
 4 E E 0.008565 0.142745 0.848689 -> 0.848689 
 5 K E 0.006308 0.140541 0.853151 -> 0.853151 
 6 S E 0.019153 0.236307 0.744540 -> 0.744540 
 7 S M 0.076510 0.476984 0.446506 -> 0.476984 
 8 D E 0.010808 0.137407 0.851785 -> 0.851785 
 9 I M 0.067799 0.508635 0.423566 -> 0.508635 
 10 A B 0.823230 0.167257 0.009513 -> 0.823230 
 11 Q M 0.033595 0.509824 0.456581 -> 0.509824 
 12 V B 0.776421 0.216846 0.006733 -> 0.776421 
 13 K E 0.006964 0.365394 0.627641 -> 0.627641 
 14 I B 0.888428 0.109759 0.001814 -> 0.888428 
 15 K E 0.001797 0.145453 0.852750 -> 0.852750 
 16 D E 0.022741 0.258261 0.718998 -> 0.718998 
 17 V M 0.183929 0.714806 0.101265 -> 0.714806 
 18 S E 0.036220 0.357026 0.606754 -> 0.606754 
 19 Y M 0.089203 0.580302 0.330495 -> 0.580302 
 20 T M 0.225038 0.515435 0.259528 -> 0.515435 
 21 L E 0.094140 0.324456 0.581403 -> 0.581403 
 22 P E 0.087272 0.369401 0.543327 -> 0.543327 
 23 S E 0.036773 0.247917 0.715310 -> 0.715310 
 24 K E 0.014363 0.168797 0.816840 -> 0.816840 
 25 Y M 0.212232 0.538150 0.249618 -> 0.538150 
 26 D E 0.073039 0.313921 0.613040 -> 0.613040 
 27 K E 0.018312 0.227750 0.753938 -> 0.753938 
 28 S E 0.035587 0.238073 0.726341 -> 0.726341 
 29 T E 0.038768 0.342313 0.618918 -> 0.618918 
 30 S E 0.025528 0.224416 0.750056 -> 0.750056 
 31 D E 0.007796 0.096584 0.895620 -> 0.895620 
 32 D E 0.030909 0.289903 0.679188 -> 0.679188 
 33 Q E 0.031991 0.403046 0.564963 -> 0.564963 
 34 L M 0.185463 0.731445 0.083092 -> 0.731445 
 35 V B 0.682660 0.300834 0.016506 -> 0.682660 
 36 L B 0.949939 0.045633 0.004429 -> 0.949939 
 37 K M 0.198526 0.680493 0.120981 -> 0.680493 
 38 V B 0.986283 0.012616 0.001102 -> 0.986283 
 39 N M 0.177281 0.748971 0.073748 -> 0.748971 
 40 V B 0.982069 0.016515 0.001416 -> 0.982069 
 41 A M 0.198230 0.730474 0.071296 -> 0.730474 
 42 V B 0.955519 0.043066 0.001415 -> 0.955519 
 43 K M 0.021014 0.633169 0.345817 -> 0.633169 
 44 N B 0.823088 0.167391 0.009522 -> 0.823088 
 45 T M 0.057455 0.554741 0.387804 -> 0.554741 
 46 G E 0.146925 0.379050 0.474024 -> 0.474024 
 47 K E 0.001400 0.034440 0.964159 -> 0.964159 
 48 D E 0.015856 0.285113 0.699031 -> 0.699031 
 49 P E 0.005570 0.127923 0.866507 -> 0.866507 
 50 L M 0.353051 0.606174 0.040774 -> 0.606174 
 51 N E 0.018278 0.320455 0.661267 -> 0.661267 
 52 V B 0.689045 0.294796 0.016159 -> 0.689045 
 53 D M 0.214465 0.560085 0.225450 -> 0.560085 
 54 S M 0.315093 0.391361 0.293546 -> 0.391361 
 55 M M 0.285628 0.400049 0.314323 -> 0.400049 
 56 D M 0.325739 0.462154 0.212107 -> 0.462154 
 57 F B 0.954694 0.042554 0.002752 -> 0.954694 
 58 T M 0.167275 0.685251 0.147473 -> 0.685251 
 59 L B 0.945087 0.051809 0.003104 -> 0.945087 
 60 Y M 0.052956 0.730462 0.216581 -> 0.730462 
 61 Q M 0.292286 0.616475 0.091239 -> 0.616475 
 62 G E 0.034160 0.189865 0.775975 -> 0.775975 
 63 D E 0.015463 0.084366 0.900171 -> 0.900171 
 64 T E 0.027519 0.287814 0.684667 -> 0.684667 
 65 K E 0.005715 0.114850 0.879436 -> 0.879436 
 66 M M 0.107930 0.490155 0.401916 -> 0.490155 
 67 S M 0.133787 0.510119 0.356094 -> 0.510119 
 68 D E 0.042682 0.298221 0.659097 -> 0.659097 
 69 T M 0.128052 0.457992 0.413955 -> 0.457992 
 70 D M 0.169923 0.431447 0.398629 -> 0.431447 
 71 P M 0.292694 0.374486 0.332820 -> 0.374486 
 72 E E 0.019540 0.197583 0.782877 -> 0.782877 
 73 D E 0.105476 0.373948 0.520576 -> 0.520576 
 74 Y M 0.314724 0.475183 0.210092 -> 0.475183 
 75 S E 0.119442 0.337261 0.543297 -> 0.543297 
 76 E E 0.019696 0.226600 0.753704 -> 0.753704 
 77 K E 0.007574 0.152657 0.839769 -> 0.839769 
 78 L B 0.542910 0.363594 0.093496 -> 0.542910 
 79 Q E 0.021393 0.282927 0.695681 -> 0.695681 
 80 G E 0.079512 0.299728 0.620759 -> 0.620759 
 81 S E 0.061237 0.438287 0.500475 -> 0.500475 
 82 T E 0.020064 0.212152 0.767784 -> 0.767784 
 83 I B 0.745994 0.239385 0.014621 -> 0.745994 
 84 N E 0.032973 0.452119 0.514908 -> 0.514908 
 85 A E 0.039948 0.211640 0.748412 -> 0.748412 
 86 D E 0.010407 0.094582 0.895011 -> 0.895011 
 87 K E 0.016974 0.291096 0.691931 -> 0.691931 
 88 S E 0.041452 0.283805 0.674743 -> 0.674743 
 89 V M 0.281066 0.634815 0.084119 -> 0.634815 
 90 E E 0.028621 0.363852 0.607528 -> 0.607528 
 91 G B 0.757490 0.228732 0.013777 -> 0.757490 
 92 N M 0.138376 0.756566 0.105058 -> 0.756566 
 93 L B 0.967451 0.031359 0.001190 -> 0.967451 
 94 F B 0.691146 0.302438 0.006417 -> 0.691146 
 95 F B 0.982252 0.016988 0.000760 -> 0.982252 
 96 V M 0.302485 0.632959 0.064556 -> 0.632959 
 97 V B 0.922956 0.072094 0.004950 -> 0.922956 
 98 D M 0.039733 0.525782 0.434486 -> 0.525782 
 99 K E 0.004564 0.073949 0.921488 -> 0.921488 
 100 G E 0.016549 0.044065 0.939386 -> 0.939386 
 101 K E 0.011572 0.340905 0.647524 -> 0.647524 
 102 Q E 0.014802 0.198650 0.786548 -> 0.786548 
 103 Y B 0.544640 0.436282 0.019078 -> 0.544640 
 104 E M 0.082003 0.674013 0.243985 -> 0.674013 
 105 L B 0.896092 0.096604 0.007304 -> 0.896092 
 106 N M 0.234594 0.662713 0.102693 -> 0.662713 
 107 Y B 0.748965 0.236530 0.014506 -> 0.748965 
 108 T M 0.193780 0.571204 0.235015 -> 0.571204 
 109 P M 0.192217 0.450161 0.357622 -> 0.450161 
 110 E E 0.016618 0.264354 0.719028 -> 0.719028 
 111 S B 0.430484 0.378062 0.191454 -> 0.430484 
 112 Y M 0.199746 0.474026 0.326229 -> 0.474026 
 113 G E 0.061274 0.318749 0.619977 -> 0.619977 
 114 D E 0.020513 0.157016 0.822471 -> 0.822471 
 115 K E 0.005311 0.071664 0.923025 -> 0.923025 
 116 K E 0.006551 0.152426 0.841023 -> 0.841023 
 117 P E 0.036195 0.281490 0.682314 -> 0.682314 
 118 K E 0.013248 0.349928 0.636824 -> 0.636824 
 119 S E 0.005916 0.150135 0.843949 -> 0.843949 
 120 V B 0.586746 0.408750 0.004504 -> 0.586746 
 121 T E 0.009551 0.366146 0.624303 -> 0.624303 
 122 F B 0.808847 0.186622 0.004531 -> 0.808847 
 123 K E 0.002122 0.229517 0.768361 -> 0.768361 
 124 I B 0.774669 0.219038 0.006293 -> 0.774669 
 125 D E 0.012597 0.298834 0.688569 -> 0.688569 
 126 G M 0.168890 0.528753 0.302357 -> 0.528753 
 127 K E 0.008028 0.171846 0.820126 -> 0.820126 
 128 D E 0.046839 0.223375 0.729786 -> 0.729786 
 129 K E 0.030516 0.362855 0.606629 -> 0.606629 
 130 K E 0.002606 0.116490 0.880904 -> 0.880904 
 131 I B 0.492851 0.404173 0.102976 -> 0.492851 
 132 L M 0.204094 0.541089 0.254817 -> 0.541089 
 133 A E 0.010464 0.114241 0.875295 -> 0.875295 
 134 T E 0.044161 0.399674 0.556166 -> 0.556166 
 135 A E 0.115345 0.328547 0.556108 -> 0.556108 
 136 D E 0.004219 0.095334 0.900447 -> 0.900447 
 137 K E 0.002429 0.065600 0.931972 -> 0.931972 
 138 L E 0.020304 0.296024 0.683672 -> 0.683672 
