# Supplementary material for: AcconPred: Predicting Solvent Accessibility and Contact Number Simultaneously by a Multitask Learning Framework under the Conditional Neural Fields Model
Source: Biomed Res Int. 2015 Aug 3;2015:678764. doi: 10.1155/2015/678764 (PMC4538422; doi:10.1155/2015/678764)
Supplement: Supplementary file 1 — Training/testing dataset as well as the CASP11 evaluation dataset could be found in the Supplementary Material. The CASP11 evaluation dataset contains all detailed results from SPINE-X, SANN, ACCpro5 and AcconPred. [file 678764.f1.zip › Supplmentary_Files/105_casp11_domain/casp11_domain_AcconPred/T0848-D2.reso]

# AcconPred: three-state solvent accessibility prediction results 
# probabilities are in the order of B (Bury, pACC: 0-10), M (Medium, pACC: 11-40) and E (Exposed, pACC: 41-100), 
# where pACC is the relative solvent accessibility value calculated by DSSP 
# output format: <position> <one letter amino acid> <predicted label> ... <probabilities> ... -> <maximal probability> 

 1 Q E 0.008853 0.065315 0.925831 -> 0.925831 
 2 D E 0.006876 0.133495 0.859629 -> 0.859629 
 3 S M 0.107558 0.559624 0.332817 -> 0.559624 
 4 A E 0.024439 0.246141 0.729420 -> 0.729420 
 5 K E 0.008324 0.235718 0.755957 -> 0.755957 
 6 A B 0.879779 0.093351 0.026870 -> 0.879779 
 7 L B 0.879148 0.107939 0.012912 -> 0.879148 
 8 S M 0.118190 0.688525 0.193285 -> 0.688525 
 9 A B 0.657561 0.295187 0.047252 -> 0.657561 
 10 Y B 0.767800 0.215241 0.016960 -> 0.767800 
 11 V B 0.972837 0.021249 0.005914 -> 0.972837 
 12 D M 0.400907 0.501705 0.097387 -> 0.501705 
 13 V B 0.760258 0.174698 0.065044 -> 0.760258 
 14 L B 0.731165 0.224065 0.044770 -> 0.731165 
 15 L B 0.712629 0.248234 0.039137 -> 0.712629 
 16 F B 0.511931 0.420418 0.067651 -> 0.511931 
 17 G M 0.300741 0.416003 0.283255 -> 0.416003 
 18 K E 0.046130 0.314508 0.639362 -> 0.639362 
 19 D E 0.025034 0.211945 0.763021 -> 0.763021 
 20 N M 0.065720 0.560583 0.373697 -> 0.560583 
 21 A E 0.016624 0.100195 0.883181 -> 0.883181 
 22 D E 0.027166 0.391969 0.580865 -> 0.580865 
 23 F B 0.556300 0.414520 0.029180 -> 0.556300 
 24 E E 0.008531 0.193670 0.797799 -> 0.797799 
 25 K E 0.004874 0.108737 0.886389 -> 0.886389 
 26 I M 0.440092 0.488321 0.071587 -> 0.488321 
 27 T M 0.176337 0.494571 0.329093 -> 0.494571 
 28 G E 0.032437 0.198898 0.768665 -> 0.768665 
 29 A E 0.039153 0.249510 0.711337 -> 0.711337 
 30 N E 0.049616 0.288394 0.661990 -> 0.661990 
 31 K E 0.021740 0.225462 0.752797 -> 0.752797 
 32 N E 0.016379 0.139040 0.844581 -> 0.844581 
 33 E E 0.012869 0.208636 0.778495 -> 0.778495 
 34 I B 0.469851 0.440529 0.089620 -> 0.469851 
 35 V M 0.208161 0.635223 0.156615 -> 0.635223 
 36 N E 0.017223 0.234874 0.747903 -> 0.747903 
 37 D E 0.053904 0.417789 0.528307 -> 0.528307 
 38 F B 0.826805 0.156958 0.016237 -> 0.826805 
 39 N M 0.115892 0.714117 0.169991 -> 0.714117 
 40 E E 0.007139 0.136556 0.856306 -> 0.856306 
 41 S M 0.085130 0.467241 0.447629 -> 0.467241 
 42 A B 0.712114 0.264087 0.023799 -> 0.712114 
 43 K E 0.039651 0.451102 0.509248 -> 0.509248 
 44 D E 0.005413 0.063376 0.931211 -> 0.931211 
 45 G E 0.086159 0.439981 0.473860 -> 0.473860 
 46 Y B 0.630340 0.329113 0.040547 -> 0.630340 
 47 L M 0.132897 0.544240 0.322863 -> 0.544240 
 48 S E 0.047899 0.229587 0.722515 -> 0.722515 
 49 A E 0.134773 0.407695 0.457532 -> 0.457532 
 50 S M 0.299446 0.354739 0.345815 -> 0.354739 
 51 G E 0.095622 0.249204 0.655174 -> 0.655174 
 52 L B 0.453392 0.373904 0.172704 -> 0.453392 
 53 S M 0.264022 0.388841 0.347137 -> 0.388841 
 54 S E 0.098464 0.362617 0.538919 -> 0.538919 
 55 T E 0.044649 0.262123 0.693228 -> 0.693228 
 56 Y E 0.046378 0.380249 0.573373 -> 0.573373 
 57 A B 0.539630 0.386384 0.073986 -> 0.539630 
 58 D E 0.044077 0.408631 0.547292 -> 0.547292 
 59 S M 0.076554 0.549851 0.373595 -> 0.549851 
 60 K E 0.001663 0.019239 0.979098 -> 0.979098 
 61 A M 0.266672 0.566959 0.166369 -> 0.566959 
 62 L B 0.875059 0.092921 0.032020 -> 0.875059 
 63 D M 0.035286 0.503610 0.461104 -> 0.503610 
 64 N E 0.019646 0.254715 0.725639 -> 0.725639 
 65 I B 0.801479 0.187735 0.010786 -> 0.801479 
 66 V B 0.775929 0.217446 0.006625 -> 0.775929 
 67 N E 0.006123 0.168101 0.825776 -> 0.825776 
 68 G M 0.347146 0.550961 0.101893 -> 0.550961 
 69 I B 0.818669 0.170658 0.010674 -> 0.818669 
 70 K E 0.012123 0.414507 0.573371 -> 0.573371 
 71 E E 0.005623 0.090011 0.904366 -> 0.904366 
 72 G B 0.457836 0.417524 0.124641 -> 0.457836 
 73 L B 0.498386 0.437463 0.064151 -> 0.498386 
 74 S E 0.049284 0.283503 0.667213 -> 0.667213 
 75 K E 0.002504 0.051780 0.945715 -> 0.945715 
 76 N M 0.094081 0.462093 0.443826 -> 0.462093 
 77 S B 0.518547 0.387204 0.094249 -> 0.518547 
 78 S E 0.025144 0.257430 0.717426 -> 0.717426 
 79 I M 0.446814 0.534180 0.019006 -> 0.534180 
 80 Q E 0.003820 0.162307 0.833873 -> 0.833873 
 81 A M 0.304254 0.622339 0.073407 -> 0.622339 
 82 K E 0.001978 0.131441 0.866581 -> 0.866581 
 83 T M 0.386911 0.551900 0.061189 -> 0.551900 
 84 T E 0.021790 0.364469 0.613742 -> 0.613742 
 85 S M 0.129828 0.503979 0.366194 -> 0.503979 
 86 I E 0.040431 0.365628 0.593941 -> 0.593941 
 87 S M 0.170619 0.553307 0.276074 -> 0.553307 
 88 K E 0.002484 0.029269 0.968247 -> 0.968247 
 89 D E 0.008211 0.142883 0.848906 -> 0.848906 
 90 E E 0.018912 0.402926 0.578162 -> 0.578162 
 91 A B 0.866959 0.126097 0.006945 -> 0.866959 
 92 I M 0.094905 0.679764 0.225331 -> 0.679764 
 93 V B 0.864838 0.129621 0.005541 -> 0.864838 
 94 E M 0.047629 0.643626 0.308745 -> 0.643626 
 95 A B 0.789758 0.205063 0.005179 -> 0.789758 
 96 T E 0.019931 0.449010 0.531059 -> 0.531059 
 97 V M 0.257180 0.634884 0.107936 -> 0.634884 
 98 K E 0.009206 0.272223 0.718571 -> 0.718571 
 99 P E 0.049822 0.357005 0.593173 -> 0.593173 
 100 V B 0.708131 0.269064 0.022805 -> 0.708131 
 101 D M 0.113126 0.552394 0.334480 -> 0.552394 
 102 A B 0.793510 0.157191 0.049299 -> 0.793510 
 103 S E 0.008946 0.222601 0.768453 -> 0.768453 
 104 S E 0.019850 0.361683 0.618468 -> 0.618468 
 105 L B 0.743471 0.236003 0.020526 -> 0.743471 
 106 S M 0.344899 0.583577 0.071524 -> 0.583577 
 107 D E 0.002644 0.076677 0.920678 -> 0.920678 
 108 R E 0.007350 0.300367 0.692283 -> 0.692283 
 109 I B 0.936496 0.057114 0.006390 -> 0.936496 
 110 E M 0.121517 0.659675 0.218808 -> 0.659675 
 111 D E 0.004160 0.113281 0.882559 -> 0.882559 
 112 K E 0.026367 0.455981 0.517652 -> 0.517652 
 113 V B 0.750781 0.236728 0.012492 -> 0.750781 
 114 K E 0.004615 0.304101 0.691285 -> 0.691285 
 115 D E 0.001553 0.095141 0.903306 -> 0.903306 
 116 Y M 0.088891 0.679804 0.231305 -> 0.679804 
 117 Y M 0.328944 0.610756 0.060300 -> 0.610756 
 118 S E 0.006443 0.147723 0.845834 -> 0.845834 
 119 K E 0.001121 0.035084 0.963795 -> 0.963795 
 120 N M 0.120202 0.575374 0.304424 -> 0.575374 
 121 S E 0.032507 0.159946 0.807547 -> 0.807547 
 122 S E 0.047585 0.184355 0.768060 -> 0.768060 
 123 A E 0.055007 0.304297 0.640696 -> 0.640696 
 124 S E 0.083305 0.324692 0.592003 -> 0.592003 
 125 Y M 0.114745 0.691464 0.193791 -> 0.691464 
 126 E E 0.007309 0.103979 0.888712 -> 0.888712 
 127 E E 0.010842 0.342228 0.646930 -> 0.646930 
 128 A B 0.969053 0.026146 0.004801 -> 0.969053 
 129 V B 0.724117 0.258901 0.016982 -> 0.724117 
 130 K E 0.004627 0.174269 0.821103 -> 0.821103 
 131 Y M 0.074760 0.776417 0.148823 -> 0.776417 
 132 A B 0.940794 0.048054 0.011152 -> 0.940794 
 133 L B 0.616196 0.343987 0.039817 -> 0.616196 
 134 Q E 0.001998 0.097089 0.900913 -> 0.900913 
 135 V M 0.229215 0.647310 0.123475 -> 0.647310 
 136 Y B 0.744317 0.238529 0.017153 -> 0.744317 
 137 P M 0.339667 0.555046 0.105286 -> 0.555046 
 138 E E 0.005400 0.096861 0.897739 -> 0.897739 
 139 E M 0.142838 0.713904 0.143259 -> 0.713904 
 140 F B 0.912286 0.082596 0.005118 -> 0.912286 
 141 K E 0.004632 0.115345 0.880023 -> 0.880023 
 142 K E 0.001522 0.036819 0.961659 -> 0.961659 
 143 L M 0.212531 0.634762 0.152707 -> 0.634762 
 144 G E 0.030166 0.215324 0.754510 -> 0.754510 
 145 P E 0.086356 0.383101 0.530543 -> 0.530543 
 146 A E 0.021912 0.235820 0.742268 -> 0.742268 
 147 S E 0.023622 0.245547 0.730831 -> 0.730831 
 148 S E 0.016009 0.226329 0.757663 -> 0.757663 
 149 E E 0.002881 0.078813 0.918307 -> 0.918307 
 150 K E 0.003245 0.150020 0.846735 -> 0.846735 
 151 T E 0.020598 0.317193 0.662208 -> 0.662208 
 152 V B 0.630294 0.361823 0.007883 -> 0.630294 
 153 E E 0.016034 0.452020 0.531946 -> 0.531946 
 154 V B 0.879319 0.116463 0.004219 -> 0.879319 
 155 K E 0.010768 0.448653 0.540579 -> 0.540579 
 156 M B 0.936734 0.061293 0.001973 -> 0.936734 
 157 K E 0.008881 0.369072 0.622047 -> 0.622047 
 158 K M 0.123411 0.577051 0.299537 -> 0.577051 
 159 N E 0.034233 0.374130 0.591637 -> 0.591637 
 160 D E 0.039187 0.289431 0.671383 -> 0.671383 
 161 I E 0.073015 0.410742 0.516243 -> 0.516243 
 162 D E 0.007307 0.126984 0.865709 -> 0.865709 
 163 Q M 0.055370 0.514367 0.430263 -> 0.514367 
 164 W B 0.642214 0.332595 0.025191 -> 0.642214 
 165 Q M 0.037461 0.526866 0.435672 -> 0.526866 
 166 L B 0.583795 0.364755 0.051450 -> 0.583795 
 167 D M 0.159816 0.499398 0.340787 -> 0.499398 
 168 M M 0.186095 0.481871 0.332034 -> 0.481871 
 169 D E 0.025623 0.217165 0.757213 -> 0.757213 
 170 D M 0.106991 0.538192 0.354817 -> 0.538192 
 171 Y M 0.082621 0.489036 0.428343 -> 0.489036 
 172 R M 0.065828 0.571795 0.362378 -> 0.571795 
 173 A B 0.648637 0.224471 0.126891 -> 0.648637 
 174 A M 0.138103 0.457719 0.404178 -> 0.457719 
 175 E M 0.091558 0.602276 0.306165 -> 0.602276 
 176 L B 0.888198 0.086421 0.025381 -> 0.888198 
 177 V B 0.754397 0.211051 0.034552 -> 0.754397 
 178 E E 0.014660 0.350748 0.634592 -> 0.634592 
 179 A M 0.242050 0.427630 0.330321 -> 0.427630 
 180 F B 0.602975 0.345101 0.051923 -> 0.602975 
 181 I M 0.161112 0.549863 0.289025 -> 0.549863 
 182 K E 0.004500 0.101410 0.894090 -> 0.894090 
 183 E E 0.000672 0.023526 0.975802 -> 0.975802 
