# Supplementary material for: AcconPred: Predicting Solvent Accessibility and Contact Number Simultaneously by a Multitask Learning Framework under the Conditional Neural Fields Model
Source: Biomed Res Int. 2015 Aug 3;2015:678764. doi: 10.1155/2015/678764 (PMC4538422; doi:10.1155/2015/678764)
Supplement: Supplementary file 1 — Training/testing dataset as well as the CASP11 evaluation dataset could be found in the Supplementary Material. The CASP11 evaluation dataset contains all detailed results from SPINE-X, SANN, ACCpro5 and AcconPred. [file 678764.f1.zip › Supplmentary_Files/105_casp11_domain/casp11_domain_AcconPred/T0849-D1.reso]

# AcconPred: three-state solvent accessibility prediction results 
# probabilities are in the order of B (Bury, pACC: 0-10), M (Medium, pACC: 11-40) and E (Exposed, pACC: 41-100), 
# where pACC is the relative solvent accessibility value calculated by DSSP 
# output format: <position> <one letter amino acid> <predicted label> ... <probabilities> ... -> <maximal probability> 

 1 M E 0.008880 0.048433 0.942686 -> 0.942686 
 2 N E 0.006531 0.098739 0.894730 -> 0.894730 
 3 E E 0.013645 0.298653 0.687702 -> 0.687702 
 4 P E 0.024818 0.294968 0.680214 -> 0.680214 
 5 I M 0.473858 0.498129 0.028013 -> 0.498129 
 6 I M 0.210437 0.742192 0.047372 -> 0.742192 
 7 L B 0.940055 0.053733 0.006212 -> 0.940055 
 8 R M 0.424294 0.520640 0.055066 -> 0.520640 
 9 Y B 0.532995 0.411353 0.055653 -> 0.532995 
 10 F B 0.737493 0.211115 0.051392 -> 0.737493 
 11 P M 0.359577 0.465269 0.175154 -> 0.465269 
 12 V B 0.599139 0.254483 0.146378 -> 0.599139 
 13 L B 0.488489 0.423407 0.088104 -> 0.488489 
 14 G B 0.772758 0.145520 0.081721 -> 0.772758 
 15 R M 0.347283 0.577100 0.075617 -> 0.577100 
 16 A B 0.962827 0.030494 0.006679 -> 0.962827 
 17 Q B 0.621505 0.336917 0.041579 -> 0.621505 
 18 A B 0.875954 0.110582 0.013464 -> 0.875954 
 19 L B 0.991575 0.007606 0.000820 -> 0.991575 
 20 R B 0.640783 0.340012 0.019205 -> 0.640783 
 21 H B 0.860681 0.117261 0.022057 -> 0.860681 
 22 A B 0.982184 0.015744 0.002071 -> 0.982184 
 23 L B 0.938234 0.060303 0.001463 -> 0.938234 
 24 A M 0.375627 0.489529 0.134844 -> 0.489529 
 25 D M 0.174427 0.618003 0.207569 -> 0.618003 
 26 A M 0.220786 0.693327 0.085887 -> 0.693327 
 27 E E 0.001777 0.037428 0.960795 -> 0.960795 
 28 L B 0.659402 0.317855 0.022742 -> 0.659402 
 29 A E 0.018044 0.161238 0.820718 -> 0.820718 
 30 F M 0.481987 0.496341 0.021671 -> 0.496341 
 31 R E 0.001248 0.117306 0.881446 -> 0.881446 
 32 D E 0.027550 0.486172 0.486279 -> 0.486279 
 33 L M 0.069718 0.677659 0.252623 -> 0.677659 
 34 R E 0.009329 0.262702 0.727970 -> 0.727970 
 35 I B 0.856013 0.141475 0.002512 -> 0.856013 
 36 P E 0.017536 0.223119 0.759345 -> 0.759345 
 37 L M 0.191673 0.654787 0.153541 -> 0.654787 
 38 E E 0.001613 0.057459 0.940928 -> 0.940928 
 39 Q E 0.007892 0.196376 0.795733 -> 0.795733 
 40 W B 0.541313 0.425096 0.033590 -> 0.541313 
 41 S E 0.048428 0.251418 0.700154 -> 0.700154 
 42 Q E 0.009692 0.094769 0.895538 -> 0.895538 
 43 H M 0.168205 0.575270 0.256525 -> 0.575270 
 44 K E 0.038613 0.302883 0.658504 -> 0.658504 
 45 D E 0.023388 0.148678 0.827934 -> 0.827934 
 46 S E 0.094337 0.403862 0.501802 -> 0.501802 
 47 D E 0.013030 0.184993 0.801977 -> 0.801977 
 48 A E 0.053192 0.224835 0.721973 -> 0.721973 
 49 G E 0.043554 0.228558 0.727888 -> 0.727888 
 50 G M 0.372037 0.456956 0.171007 -> 0.456956 
 51 P B 0.353034 0.336975 0.309991 -> 0.353034 
 52 Y M 0.159703 0.512851 0.327446 -> 0.512851 
 53 G M 0.301027 0.478266 0.220707 -> 0.478266 
 54 S M 0.136426 0.537698 0.325875 -> 0.537698 
 55 L B 0.869174 0.128709 0.002117 -> 0.869174 
 56 P B 0.840416 0.155705 0.003879 -> 0.840416 
 57 T B 0.957495 0.039899 0.002606 -> 0.957495 
 58 L B 0.991547 0.008356 0.000097 -> 0.991547 
 59 R M 0.061535 0.701974 0.236491 -> 0.701974 
 60 W M 0.291914 0.651853 0.056232 -> 0.651853 
 61 H E 0.001924 0.114390 0.883686 -> 0.883686 
 62 G E 0.005511 0.064797 0.929692 -> 0.929692 
 63 V M 0.127603 0.633362 0.239034 -> 0.633362 
 64 E M 0.048443 0.533279 0.418278 -> 0.533279 
 65 V B 0.847882 0.142698 0.009419 -> 0.847882 
 66 A B 0.663462 0.285287 0.051251 -> 0.663462 
 67 E B 0.455477 0.420315 0.124208 -> 0.455477 
 68 T B 0.876980 0.114154 0.008866 -> 0.876980 
 69 I B 0.528767 0.434014 0.037219 -> 0.528767 
 70 A B 0.823603 0.126926 0.049471 -> 0.823603 
 71 I B 0.994910 0.003730 0.001360 -> 0.994910 
 72 A B 0.982864 0.015719 0.001417 -> 0.982864 
 73 S M 0.343680 0.579501 0.076819 -> 0.579501 
 74 F M 0.472326 0.507285 0.020389 -> 0.507285 
 75 L B 0.951622 0.044617 0.003762 -> 0.951622 
 76 A B 0.604357 0.356805 0.038838 -> 0.604357 
 77 R E 0.005967 0.161659 0.832373 -> 0.832373 
 78 S M 0.088669 0.534159 0.377172 -> 0.534159 
 79 L M 0.468331 0.485145 0.046525 -> 0.485145 
 80 G E 0.045254 0.293385 0.661361 -> 0.661361 
 81 H E 0.048672 0.326081 0.625247 -> 0.625247 
 82 Y M 0.177083 0.424674 0.398243 -> 0.424674 
 83 E E 0.098660 0.363392 0.537948 -> 0.537948 
 84 G E 0.265014 0.359175 0.375811 -> 0.375811 
 85 R E 0.027644 0.276214 0.696142 -> 0.696142 
 86 D E 0.038261 0.380875 0.580863 -> 0.580863 
 87 N M 0.182199 0.428504 0.389297 -> 0.428504 
 88 G E 0.218995 0.373222 0.407783 -> 0.407783 
 89 E M 0.334398 0.518171 0.147431 -> 0.518171 
 90 I B 0.497707 0.426583 0.075710 -> 0.497707 
 91 A B 0.462210 0.271530 0.266260 -> 0.462210 
 92 R M 0.117350 0.647502 0.235148 -> 0.647502 
 93 L B 0.895401 0.084768 0.019831 -> 0.895401 
 94 E M 0.317770 0.603563 0.078667 -> 0.603563 
 95 A B 0.547668 0.337768 0.114564 -> 0.547668 
 96 V B 0.917936 0.072433 0.009632 -> 0.917936 
 97 V B 0.968994 0.025811 0.005195 -> 0.968994 
 98 S M 0.259286 0.550563 0.190151 -> 0.550563 
 99 L B 0.535736 0.400950 0.063314 -> 0.535736 
 100 C B 0.938618 0.052774 0.008608 -> 0.938618 
 101 Y B 0.561246 0.408047 0.030707 -> 0.561246 
 102 T E 0.172729 0.383011 0.444260 -> 0.444260 
 103 E M 0.249693 0.561797 0.188510 -> 0.561797 
 104 V B 0.972381 0.022580 0.005039 -> 0.972381 
 105 S B 0.571767 0.382299 0.045933 -> 0.571767 
 106 L M 0.171820 0.428261 0.399920 -> 0.428261 
 107 Q M 0.347084 0.580455 0.072461 -> 0.580455 
 108 I B 0.943524 0.049485 0.006990 -> 0.943524 
 109 A B 0.534025 0.362963 0.103012 -> 0.534025 
 110 Q E 0.089295 0.348735 0.561969 -> 0.561969 
 111 L B 0.531962 0.419871 0.048168 -> 0.531962 
 112 L B 0.697329 0.270093 0.032578 -> 0.697329 
 113 W M 0.232683 0.522533 0.244784 -> 0.522533 
 114 L M 0.194572 0.455866 0.349561 -> 0.455866 
 115 D E 0.149273 0.403602 0.447125 -> 0.447125 
 116 L M 0.346201 0.431724 0.222076 -> 0.431724 
 117 F M 0.296801 0.378401 0.324798 -> 0.378401 
 118 N E 0.081041 0.389842 0.529116 -> 0.529116 
 119 P E 0.043645 0.125578 0.830777 -> 0.830777 
 120 G E 0.144612 0.297241 0.558147 -> 0.558147 
 121 V E 0.126458 0.383060 0.490482 -> 0.490482 
 122 D E 0.017718 0.159503 0.822779 -> 0.822779 
 123 L M 0.239811 0.495302 0.264886 -> 0.495302 
 124 A E 0.129624 0.316734 0.553643 -> 0.553643 
 125 A E 0.039647 0.145490 0.814863 -> 0.814863 
 126 A E 0.247008 0.374745 0.378247 -> 0.378247 
 127 V B 0.476544 0.453726 0.069729 -> 0.476544 
 128 P E 0.023657 0.167380 0.808964 -> 0.808964 
 129 L E 0.034529 0.209279 0.756193 -> 0.756193 
 130 Q B 0.619682 0.345545 0.034773 -> 0.619682 
 131 F M 0.471961 0.498826 0.029212 -> 0.498826 
 132 G E 0.025415 0.174145 0.800440 -> 0.800440 
 133 R M 0.049751 0.598450 0.351798 -> 0.598450 
 134 L B 0.991566 0.006287 0.002147 -> 0.991566 
 135 V M 0.096184 0.668221 0.235595 -> 0.668221 
 136 A E 0.046837 0.199877 0.753286 -> 0.753286 
 137 R M 0.449015 0.536241 0.014744 -> 0.536241 
 138 L B 0.932995 0.064204 0.002802 -> 0.932995 
 139 T E 0.012193 0.272555 0.715253 -> 0.715253 
 140 R M 0.015318 0.522552 0.462130 -> 0.522552 
 141 L B 0.976564 0.017362 0.006074 -> 0.976564 
 142 E M 0.176549 0.724584 0.098867 -> 0.724584 
 143 A E 0.006026 0.044679 0.949295 -> 0.949295 
 144 H M 0.090120 0.728300 0.181579 -> 0.728300 
 145 T B 0.698867 0.283597 0.017535 -> 0.698867 
 146 P E 0.013386 0.122092 0.864522 -> 0.864522 
 147 E E 0.001313 0.046575 0.952112 -> 0.952112 
 148 A M 0.081500 0.571449 0.347051 -> 0.571449 
 149 G E 0.093123 0.358563 0.548314 -> 0.548314 
 150 W M 0.402411 0.557399 0.040190 -> 0.557399 
 151 F B 0.884032 0.108707 0.007261 -> 0.884032 
 152 G B 0.583627 0.350037 0.066335 -> 0.583627 
 153 G M 0.321141 0.405228 0.273631 -> 0.405228 
 154 E E 0.006237 0.229277 0.764486 -> 0.764486 
 155 R E 0.005659 0.346244 0.648097 -> 0.648097 
 156 P B 0.723569 0.270982 0.005449 -> 0.723569 
 157 V B 0.826012 0.160938 0.013049 -> 0.826012 
 158 M B 0.957187 0.038920 0.003892 -> 0.957187 
 159 A B 0.932016 0.064546 0.003439 -> 0.932016 
 160 D B 0.934674 0.059436 0.005890 -> 0.934674 
 161 Y B 0.955530 0.042990 0.001480 -> 0.955530 
 162 F B 0.981928 0.011651 0.006421 -> 0.981928 
 163 A B 0.988151 0.011117 0.000732 -> 0.988151 
 164 A B 0.967940 0.030145 0.001915 -> 0.967940 
 165 E B 0.895099 0.099325 0.005576 -> 0.895099 
 166 A B 0.968869 0.028773 0.002358 -> 0.968869 
 167 I B 0.990129 0.009554 0.000318 -> 0.990129 
 168 E B 0.496561 0.476329 0.027109 -> 0.496561 
 169 A B 0.839049 0.150730 0.010221 -> 0.839049 
 170 L B 0.990296 0.008023 0.001681 -> 0.990296 
 171 R M 0.109967 0.739788 0.150245 -> 0.739788 
 172 Y M 0.181191 0.585923 0.232886 -> 0.585923 
 173 L B 0.633642 0.323538 0.042820 -> 0.633642 
 174 L M 0.400319 0.498343 0.101338 -> 0.498343 
 175 G E 0.103179 0.233503 0.663319 -> 0.663319 
 176 R E 0.067398 0.370652 0.561950 -> 0.561950 
 177 E E 0.067901 0.274883 0.657216 -> 0.657216 
 178 H M 0.238958 0.516023 0.245019 -> 0.516023 
 179 D M 0.169672 0.471276 0.359053 -> 0.471276 
 180 D E 0.040962 0.231824 0.727214 -> 0.727214 
 181 A M 0.158691 0.450027 0.391282 -> 0.450027 
 182 L B 0.854440 0.126437 0.019123 -> 0.854440 
 183 R M 0.115131 0.611946 0.272923 -> 0.611946 
 184 T E 0.013413 0.081749 0.904838 -> 0.904838 
 185 R E 0.010467 0.220411 0.769122 -> 0.769122 
 186 L B 0.665103 0.329703 0.005194 -> 0.665103 
 187 P E 0.025456 0.271512 0.703032 -> 0.703032 
 188 H M 0.044938 0.585142 0.369920 -> 0.585142 
 189 L B 0.975973 0.017009 0.007018 -> 0.975973 
 190 C M 0.142692 0.744746 0.112562 -> 0.744746 
 191 A E 0.052459 0.278814 0.668727 -> 0.668727 
 192 L B 0.805848 0.186357 0.007795 -> 0.805848 
 193 A B 0.774857 0.221788 0.003355 -> 0.774857 
 194 R E 0.002749 0.154412 0.842839 -> 0.842839 
 195 R M 0.075143 0.791867 0.132989 -> 0.791867 
 196 M B 0.948173 0.045240 0.006587 -> 0.948173 
 197 A E 0.007887 0.233192 0.758921 -> 0.758921 
 198 Q E 0.000740 0.014499 0.984761 -> 0.984761 
 199 R M 0.049666 0.857240 0.093094 -> 0.857240 
 200 P E 0.006903 0.065415 0.927682 -> 0.927682 
 201 A M 0.139735 0.556917 0.303348 -> 0.556917 
 202 L B 0.874029 0.103665 0.022306 -> 0.874029 
 203 A M 0.071261 0.467037 0.461702 -> 0.467037 
 204 Q E 0.004929 0.165616 0.829455 -> 0.829455 
 205 A M 0.441099 0.527213 0.031688 -> 0.527213 
 206 W M 0.252543 0.708174 0.039283 -> 0.708174 
 207 S E 0.013583 0.139437 0.846980 -> 0.846980 
 208 T E 0.003667 0.065374 0.930960 -> 0.930960 
 209 R M 0.078064 0.636956 0.284980 -> 0.636956 
 210 P E 0.030287 0.261381 0.708332 -> 0.708332 
 211 Q E 0.008806 0.081454 0.909739 -> 0.909739 
 212 T M 0.196697 0.403830 0.399473 -> 0.403830 
 213 F B 0.474605 0.425225 0.100170 -> 0.474605 
 214 T E 0.023507 0.151521 0.824972 -> 0.824972 
 215 A E 0.091690 0.317935 0.590374 -> 0.590374 
 216 H E 0.065787 0.412800 0.521413 -> 0.521413 
 217 P M 0.262226 0.464167 0.273608 -> 0.464167 
 218 D E 0.010916 0.172566 0.816518 -> 0.816518 
 219 E M 0.131026 0.481479 0.387495 -> 0.481479 
 220 A M 0.214901 0.426612 0.358487 -> 0.426612 
 221 A E 0.095235 0.370778 0.533988 -> 0.533988 
 222 M B 0.495693 0.368125 0.136182 -> 0.495693 
 223 L B 0.640832 0.303255 0.055914 -> 0.640832 
 224 E E 0.018883 0.260874 0.720243 -> 0.720243 
 225 R M 0.047695 0.568102 0.384203 -> 0.568102 
 226 L B 0.761900 0.208712 0.029388 -> 0.761900 
 227 R E 0.037852 0.443145 0.519002 -> 0.519002 
 228 A E 0.009339 0.086047 0.904614 -> 0.904614 
 229 L M 0.313932 0.577453 0.108615 -> 0.577453 
 230 P E 0.094472 0.300056 0.605472 -> 0.605472 
 231 L E 0.131490 0.337456 0.531054 -> 0.531054 
 232 A E 0.264153 0.267689 0.468158 -> 0.468158 
 233 A E 0.219367 0.330814 0.449819 -> 0.449819 
 234 T E 0.026025 0.217366 0.756609 -> 0.756609 
 235 I E 0.071902 0.309804 0.618294 -> 0.618294 
 236 G E 0.011729 0.078300 0.909971 -> 0.909971 
