# Supplementary material for: AcconPred: Predicting Solvent Accessibility and Contact Number Simultaneously by a Multitask Learning Framework under the Conditional Neural Fields Model
Source: Biomed Res Int. 2015 Aug 3;2015:678764. doi: 10.1155/2015/678764 (PMC4538422; doi:10.1155/2015/678764)
Supplement: Supplementary file 1 — Training/testing dataset as well as the CASP11 evaluation dataset could be found in the Supplementary Material. The CASP11 evaluation dataset contains all detailed results from SPINE-X, SANN, ACCpro5 and AcconPred. [file 678764.f1.zip › Supplmentary_Files/105_casp11_domain/casp11_domain_AccPro5/T0759-D2.reso]

>T0759-D2
55 55 25 50 55 15 35 30 60 30 35 60 45 50 40 15 10 5 25 25 40 60 45 40 55 55 15 25 5 45 50 0 10 50 45 40 40 10 20 55 50 25 5 45 40 10 45 60 60 55 15 35 10 35 20 0 0 10 10 15 50 85
