# Supplementary material for: AcconPred: Predicting Solvent Accessibility and Contact Number Simultaneously by a Multitask Learning Framework under the Conditional Neural Fields Model
Source: Biomed Res Int. 2015 Aug 3;2015:678764. doi: 10.1155/2015/678764 (PMC4538422; doi:10.1155/2015/678764)
Supplement: Supplementary file 1 — Training/testing dataset as well as the CASP11 evaluation dataset could be found in the Supplementary Material. The CASP11 evaluation dataset contains all detailed results from SPINE-X, SANN, ACCpro5 and AcconPred. [file 678764.f1.zip › Supplmentary_Files/105_casp11_domain/casp11_domain_AccPro5/T0760-D1.reso]

>T0760-D1
90 40 30 15 0 0 0 0 0 35 25 25 40 60 55 45 45 35 5 5 0 20 5 20 55 45 35 35 0 5 0 20 20 20 45 25 10 45 50 30 50 30 50 45 30 15 5 0 0 0 5 0 20 20 10 50 55 60 30 60 50 15 35 15 15 0 15 0 10 15 0 20 35 0 10 10 30 45 0 20 45 10 35 50 55 50 40 35 45 50 35 5 25 50 10 25 0 25 0 10 20 0 0 0 5 20 40 35 35 5 0 5 0 10 0 15 0 25 20 30 35 50 50 45 25 45 0 5 0 0 0 0 15 30 45 60 60 40 50 60 45 30 15 0 20 0 0 0 10 10 25 15 40 55 25 25 45 30 20 15 5 15 0 0 0 0 0 30 0 40 55 5 35 60 55 40 60 60 45 45 40 0 30 0 25 5 35 15 35 35 60 50 55 50 35 10 40 5 55 25 85
