# Supplementary material for: AcconPred: Predicting Solvent Accessibility and Contact Number Simultaneously by a Multitask Learning Framework under the Conditional Neural Fields Model
Source: Biomed Res Int. 2015 Aug 3;2015:678764. doi: 10.1155/2015/678764 (PMC4538422; doi:10.1155/2015/678764)
Supplement: Supplementary file 1 — Training/testing dataset as well as the CASP11 evaluation dataset could be found in the Supplementary Material. The CASP11 evaluation dataset contains all detailed results from SPINE-X, SANN, ACCpro5 and AcconPred. [file 678764.f1.zip › Supplmentary_Files/105_casp11_domain/casp11_domain_AccPro5/T0761-D1.reso]

>T0761-D1
55 60 30 40 15 20 40 40 40 40 45 45 20 15 45 55 35 0 10 40 5 0 15 30 10 0 30 0 10 20 30 25 35 15 35 35 50 40 0 15 45 15 0 40 5 30 15 35 35 40 20 5 40 15 0 40 40 15 25 20 30 50 60 40 25 30 35 15 0 0 25 15 15 15 30 35 50 10 10 0 10 5 20 20 20 45 60 90
