# Supplementary material for: AcconPred: Predicting Solvent Accessibility and Contact Number Simultaneously by a Multitask Learning Framework under the Conditional Neural Fields Model
Source: Biomed Res Int. 2015 Aug 3;2015:678764. doi: 10.1155/2015/678764 (PMC4538422; doi:10.1155/2015/678764)
Supplement: Supplementary file 1 — Training/testing dataset as well as the CASP11 evaluation dataset could be found in the Supplementary Material. The CASP11 evaluation dataset contains all detailed results from SPINE-X, SANN, ACCpro5 and AcconPred. [file 678764.f1.zip › Supplmentary_Files/105_casp11_domain/casp11_domain_AccPro5/T0761-D2.reso]

>T0761-D2
85 60 55 40 35 35 55 45 0 35 55 15 10 50 50 5 40 60 35 5 50 55 10 15 50 45 50 20 50 60 35 40 40 5 5 10 5 5 5 0 15 0 30 15 5 30 50 35 10 35 55 55 35 10 25 45 20 10 25 35 20 0 10 15 0 5 25 10 5 5 40 30 40 5 30 30 10 25 15 30 25 15 0 15 5 0 10 30 40 45 40 30 25 10 0 0 0 0 10 15 30 15 40 40 30 5 15 30 15 30 30 60 70
