# Supplementary material for: AcconPred: Predicting Solvent Accessibility and Contact Number Simultaneously by a Multitask Learning Framework under the Conditional Neural Fields Model
Source: Biomed Res Int. 2015 Aug 3;2015:678764. doi: 10.1155/2015/678764 (PMC4538422; doi:10.1155/2015/678764)
Supplement: Supplementary file 1 — Training/testing dataset as well as the CASP11 evaluation dataset could be found in the Supplementary Material. The CASP11 evaluation dataset contains all detailed results from SPINE-X, SANN, ACCpro5 and AcconPred. [file 678764.f1.zip › Supplmentary_Files/105_casp11_domain/casp11_domain_AccPro5/T0762-D1.reso]

>T0762-D1
90 65 65 60 60 60 55 45 5 35 0 15 0 5 10 15 30 35 30 30 25 35 0 5 45 20 0 30 55 25 0 45 60 45 40 5 40 0 25 5 20 35 0 35 35 20 15 15 5 10 40 5 5 45 55 45 35 0 15 0 0 0 0 0 0 15 15 5 0 35 40 10 25 50 55 45 55 15 45 0 10 20 10 10 35 5 5 0 0 0 0 0 0 0 0 25 40 30 30 35 25 45 50 10 45 40 5 45 50 5 45 55 40 0 25 5 0 0 5 30 15 15 5 25 15 0 15 0 0 20 0 0 30 45 20 30 0 0 35 0 40 60 60 40 55 35 35 30 20 25 40 35 5 40 50 30 50 40 40 0 30 0 25 40 5 35 20 45 30 10 5 30 5 5 35 30 0 5 0 0 0 0 0 0 5 10 0 15 45 10 60 10 45 20 45 30 5 0 5 20 30 45 25 55 60 55 30 35 30 5 0 0 0 0 0 0 20 40 45 45 55 60 45 60 55 25 55 20 0 40 40 0 15 45 5 5 40 30 60 45 0 30 50 15 0 45 55 45 15 60 50 20 25 15 25 35 55
