# Supplementary material for: AcconPred: Predicting Solvent Accessibility and Contact Number Simultaneously by a Multitask Learning Framework under the Conditional Neural Fields Model
Source: Biomed Res Int. 2015 Aug 3;2015:678764. doi: 10.1155/2015/678764 (PMC4538422; doi:10.1155/2015/678764)
Supplement: Supplementary file 1 — Training/testing dataset as well as the CASP11 evaluation dataset could be found in the Supplementary Material. The CASP11 evaluation dataset contains all detailed results from SPINE-X, SANN, ACCpro5 and AcconPred. [file 678764.f1.zip › Supplmentary_Files/105_casp11_domain/casp11_domain_AccPro5/T0763-D1.reso]

>T0763-D1
75 50 45 10 35 40 15 40 40 15 40 20 10 45 10 40 35 15 35 55 15 35 50 45 50 5 15 5 5 15 35 40 55 40 10 45 50 0 35 5 5 5 35 20 10 40 35 40 60 35 10 50 50 15 55 15 35 55 45 30 45 15 45 30 10 45 15 20 15 30 5 25 40 35 10 50 25 15 45 40 40 40 15 15 30 5 10 5 0 0 5 0 5 0 15 30 40 55 40 40 15 10 0 0 0 10 15 30 35 5 20 15 5 5 35 55 50 30 35 50 15 0 45 40 0 10 45 50 40 85
