# Supplementary material for: AcconPred: Predicting Solvent Accessibility and Contact Number Simultaneously by a Multitask Learning Framework under the Conditional Neural Fields Model
Source: Biomed Res Int. 2015 Aug 3;2015:678764. doi: 10.1155/2015/678764 (PMC4538422; doi:10.1155/2015/678764)
Supplement: Supplementary file 1 — Training/testing dataset as well as the CASP11 evaluation dataset could be found in the Supplementary Material. The CASP11 evaluation dataset contains all detailed results from SPINE-X, SANN, ACCpro5 and AcconPred. [file 678764.f1.zip › Supplmentary_Files/105_casp11_domain/casp11_domain_AccPro5/T0764-D1.reso]

>T0764-D1
85 55 45 5 20 0 35 50 20 25 5 0 5 0 5 10 40 25 20 45 40 40 60 45 35 25 5 15 5 10 5 0 5 0 5 10 10 10 20 30 55 45 40 55 10 0 0 0 0 0 0 0 5 5 10 5 25 30 10 0 30 20 25 20 50 30 25 50 5 0 0 15 10 0 0 30 40 35 5 20 0 0 0 0 0 5 5 40 20 0 15 0 10 15 5 20 40 25 20 35 10 25 25 30 10 20 30 25 5 0 10 5 10 10 25 10 25 25 10 25 35 10 15 50 25 10 35 5 25 50 45 30 50 5 0 20 25 0 0 25 20 5 5 20 30 10 25 30 20 30 25 40 10 0 5 40 0 0 0 25 0 0 40 40 5 25 40 0 0 0 0 0 0 0 5 0 0 10 5 0 0 5 0 0 15 35 20 55 30 0 20 0 0 0 0 0 0 5 10 10 10 10 20 10 40 40 35 45 15 30 40 25 5 25 15 10 40 20 30 25 40 15 30 20 20 45 15 20 20 45 25 5 35 50 5 20 50 5 0 0 0 0 0 10 0 25 20 0 45 55 20 45 40 20 25 20 15 20 35 0 20 20 5 5 30 5 0 25 10 0 0 40 5 0 35 50 20 30 5 40 0 30 5 0 30 0 30 55 20 30 0 40 5 5 0 0 0 0 0 0 10 40 20 10 45 40 0 0 50 15 0 20 50 5 0 45 55 50 55 35 90
