# Supplementary material for: AcconPred: Predicting Solvent Accessibility and Contact Number Simultaneously by a Multitask Learning Framework under the Conditional Neural Fields Model
Source: Biomed Res Int. 2015 Aug 3;2015:678764. doi: 10.1155/2015/678764 (PMC4538422; doi:10.1155/2015/678764)
Supplement: Supplementary file 1 — Training/testing dataset as well as the CASP11 evaluation dataset could be found in the Supplementary Material. The CASP11 evaluation dataset contains all detailed results from SPINE-X, SANN, ACCpro5 and AcconPred. [file 678764.f1.zip › Supplmentary_Files/105_casp11_domain/casp11_domain_AccPro5/T0765-D1.reso]

>T0765-D1
85 55 60 50 15 20 5 40 0 25 20 40 45 45 30 25 50 15 30 35 5 0 15 0 5 15 30 0 45 60 45 35 5 40 0 35 30 10 25 40 55 50 40 5 0 0 0 25 0 40 20 40 55 20 30 40 30 0 40 50 5 0 45 50 20 10 40 50 15 10 10 0 0 35 45 85
