# Supplementary material for: AcconPred: Predicting Solvent Accessibility and Contact Number Simultaneously by a Multitask Learning Framework under the Conditional Neural Fields Model
Source: Biomed Res Int. 2015 Aug 3;2015:678764. doi: 10.1155/2015/678764 (PMC4538422; doi:10.1155/2015/678764)
Supplement: Supplementary file 1 — Training/testing dataset as well as the CASP11 evaluation dataset could be found in the Supplementary Material. The CASP11 evaluation dataset contains all detailed results from SPINE-X, SANN, ACCpro5 and AcconPred. [file 678764.f1.zip › Supplmentary_Files/105_casp11_domain/casp11_domain_AccPro5/T0766-D1.reso]

>T0766-D1
80 30 35 50 50 0 20 50 10 0 50 60 30 40 10 55 45 0 20 55 20 0 45 55 45 0 30 0 5 0 30 40 55 50 55 45 10 40 45 50 30 0 40 40 15 0 40 50 5 0 55 65 30 55 30 55 45 5 40 0 25 10 40 15 50 55 60 60 10 30 0 0 0 0 25 0 40 20 60 60 50 45 0 15 0 15 0 15 0 30 40 55 65 50 50 20 25 0 25 25 0 30 5 40 50 35 70 90
