# Supplementary material for: AcconPred: Predicting Solvent Accessibility and Contact Number Simultaneously by a Multitask Learning Framework under the Conditional Neural Fields Model
Source: Biomed Res Int. 2015 Aug 3;2015:678764. doi: 10.1155/2015/678764 (PMC4538422; doi:10.1155/2015/678764)
Supplement: Supplementary file 1 — Training/testing dataset as well as the CASP11 evaluation dataset could be found in the Supplementary Material. The CASP11 evaluation dataset contains all detailed results from SPINE-X, SANN, ACCpro5 and AcconPred. [file 678764.f1.zip › Supplmentary_Files/105_casp11_domain/casp11_domain_AccPro5/T0767-D1.reso]

>T0767-D1
95 75 60 55 55 5 15 45 15 0 55 55 15 35 60 45 0 50 55 30 20 40 40 5 5 50 40 35 10 45 10 45 5 40 0 20 50 15 15 40 50 65 35 30 0 20 0 5 0 10 0 35 35 25 40 5 20 0 20 5 20 5 30 5 20 45 45 20 10 55 55 60 60 45 40 85
