# Supplementary material for: AcconPred: Predicting Solvent Accessibility and Contact Number Simultaneously by a Multitask Learning Framework under the Conditional Neural Fields Model
Source: Biomed Res Int. 2015 Aug 3;2015:678764. doi: 10.1155/2015/678764 (PMC4538422; doi:10.1155/2015/678764)
Supplement: Supplementary file 1 — Training/testing dataset as well as the CASP11 evaluation dataset could be found in the Supplementary Material. The CASP11 evaluation dataset contains all detailed results from SPINE-X, SANN, ACCpro5 and AcconPred. [file 678764.f1.zip › Supplmentary_Files/105_casp11_domain/casp11_domain_AccPro5/T0767-D2.reso]

>T0767-D2
95 70 55 65 45 45 50 5 15 35 15 5 30 35 5 10 30 20 5 35 15 35 25 30 45 55 40 10 45 40 0 20 50 10 0 50 60 30 50 60 45 10 45 10 30 25 10 5 40 50 5 5 45 45 20 30 45 30 30 15 40 25 15 5 0 0 0 0 5 15 15 40 35 0 50 45 0 30 50 25 0 25 40 10 5 50 55 50 40 60 50 5 50 60 45 5 45 50 0 30 55 45 10 55 25 50 50 45 15 35 0 5 0 5 0 5 15 35 55 60 55 20 50 50 60 40 40 15 50 40 0 5 40 0 0 55 45 5 45 60 40 60 50 20 25 50 55 10 40 0 5 0 10 0 0 45 55 35 0 40 15 50 40 15 40 10 40 55 55 40 15 10 30 5 30 5 5 45 50 85
