# Supplementary material for: AcconPred: Predicting Solvent Accessibility and Contact Number Simultaneously by a Multitask Learning Framework under the Conditional Neural Fields Model
Source: Biomed Res Int. 2015 Aug 3;2015:678764. doi: 10.1155/2015/678764 (PMC4538422; doi:10.1155/2015/678764)
Supplement: Supplementary file 1 — Training/testing dataset as well as the CASP11 evaluation dataset could be found in the Supplementary Material. The CASP11 evaluation dataset contains all detailed results from SPINE-X, SANN, ACCpro5 and AcconPred. [file 678764.f1.zip › Supplmentary_Files/105_casp11_domain/casp11_domain_AccPro5/T0768-D1.reso]

>T0768-D1
70 50 10 25 55 40 5 40 50 5 25 45 15 0 5 35 15 15 45 55 30 40 20 35 10 20 50 20 20 35 40 20 45 45 15 35 30 5 35 0 20 45 40 5 40 55 35 50 40 35 35 20 35 0 35 35 0 15 40 30 0 0 30 45 5 40 0 35 35 0 35 0 20 55 25 0 40 45 5 30 50 30 0 0 40 40 0 45 45 0 40 45 0 40 0 30 60 40 0 45 45 5 35 50 35 0 5 40 40 0 45 45 0 40 45 0 40 0 25 55 35 5 50 45 0 45 55 0 5 45 40 5 50 50 5 40 50 0 35 5 50 50 65
