# Supplementary material for: AcconPred: Predicting Solvent Accessibility and Contact Number Simultaneously by a Multitask Learning Framework under the Conditional Neural Fields Model
Source: Biomed Res Int. 2015 Aug 3;2015:678764. doi: 10.1155/2015/678764 (PMC4538422; doi:10.1155/2015/678764)
Supplement: Supplementary file 1 — Training/testing dataset as well as the CASP11 evaluation dataset could be found in the Supplementary Material. The CASP11 evaluation dataset contains all detailed results from SPINE-X, SANN, ACCpro5 and AcconPred. [file 678764.f1.zip › Supplmentary_Files/105_casp11_domain/casp11_domain_AccPro5/T0769-D1.reso]

>T0769-D1
85 40 45 10 40 10 35 5 45 5 40 35 50 50 55 50 45 5 55 55 10 5 50 40 5 15 50 45 0 40 50 45 10 40 60 50 15 45 55 30 45 10 30 35 35 10 40 45 50 50 40 35 15 40 5 30 10 45 10 50 50 45 40 55 55 45 0 50 40 0 15 50 20 0 45 55 30 5 45 60 40 5 45 65 50 35 45 60 35 45 10 40 40 35 40 55 95
