# Supplementary material for: AcconPred: Predicting Solvent Accessibility and Contact Number Simultaneously by a Multitask Learning Framework under the Conditional Neural Fields Model
Source: Biomed Res Int. 2015 Aug 3;2015:678764. doi: 10.1155/2015/678764 (PMC4538422; doi:10.1155/2015/678764)
Supplement: Supplementary file 1 — Training/testing dataset as well as the CASP11 evaluation dataset could be found in the Supplementary Material. The CASP11 evaluation dataset contains all detailed results from SPINE-X, SANN, ACCpro5 and AcconPred. [file 678764.f1.zip › Supplmentary_Files/105_casp11_domain/casp11_domain_AccPro5/T0770-D1.reso]

>T0770-D1
90 70 50 30 55 60 10 40 10 45 10 0 0 10 15 0 5 10 15 5 5 20 15 20 15 25 25 15 10 15 0 5 0 5 0 0 0 5 0 5 5 5 5 15 5 20 10 15 15 10 30 20 15 15 5 15 5 10 30 20 15 5 15 10 5 0 15 15 0 0 10 20 0 0 35 15 0 25 30 0 10 45 30 5 50 60 50 55 50 40 35 20 15 0 5 0 0 0 15 0 0 5 0 0 0 0 0 5 0 0 5 5 5 5 35 0 10 5 15 30 5 15 50 45 55 30 35 25 10 50 10 30 50 10 40 40 0 0 40 30 0 0 45 25 0 40 50 0 5 50 25 0 45 55 40 55 45 45 35 20 35 55 25 10 10 0 5 40 20 25 5 40 25 0 20 35 0 0 20 0 0 10 0 10 0 0 0 10 0 10 45 35 30 50 40 25 0 40 35 5 5 40 25 0 20 50 35 35 5 0 30 25 25 35 35 15 0 20 0 30 10 25 35 45 35 35 30 35 5 10 5 5 15 5 0 20 10 20 20 30 25 25 20 20 15 15 0 0 20 10 0 5 30 10 0 35 45 20 50 10 5 10 0 15 10 10 15 30 40 25 35 45 30 30 15 25 15 10 30 15 15 15 20 15 15 25 35 35 40 25 30 20 10 10 20 15 15 15 20 15 10 15 30 35 45 10 25 0 5 0 0 0 0 0 0 0 5 0 0 10 0 0 0 5 5 20 10 10 15 15 30 35 35 35 40 35 0 30 40 5 0 30 40 0 0 30 15 0 0 40 25 10 45 15 30 35 35 35 5 20 15 5 0 20 30 15 40 25 20 25 25 15 35 35 45 40 30 0 35 35 0 0 20 5 10 0 0 0 0 0 10 20 10 5 15 0 0 5 20 0 10 10 10 50 15 25 45 25 40 10 30 40 15 50 30 30 40 40 30 35 40 50 45 5 0 25 10 0 30 5 10 35 35 30 25 30 30 20 45 55 20 20 55 55 10 40 55 15 30 25 35 0 5 5 35 50
