# Supplementary material for: AcconPred: Predicting Solvent Accessibility and Contact Number Simultaneously by a Multitask Learning Framework under the Conditional Neural Fields Model
Source: Biomed Res Int. 2015 Aug 3;2015:678764. doi: 10.1155/2015/678764 (PMC4538422; doi:10.1155/2015/678764)
Supplement: Supplementary file 1 — Training/testing dataset as well as the CASP11 evaluation dataset could be found in the Supplementary Material. The CASP11 evaluation dataset contains all detailed results from SPINE-X, SANN, ACCpro5 and AcconPred. [file 678764.f1.zip › Supplmentary_Files/105_casp11_domain/casp11_domain_AccPro5/T0771-D1.reso]

>T0771-D1
85 60 30 15 55 35 20 30 20 15 55 50 35 50 25 5 40 40 35 35 10 15 10 20 0 30 10 45 60 60 20 55 20 0 35 5 10 35 45 55 30 45 10 20 25 25 25 0 0 15 15 15 30 40 40 50 20 15 30 55 35 0 30 15 0 0 25 40 0 0 25 55 30 30 45 55 40 30 55 60 15 30 0 0 0 0 0 10 0 20 30 50 40 25 35 5 35 40 0 35 5 40 5 20 55 20 30 15 15 0 40 0 10 0 20 0 10 30 35 0 25 30 35 5 35 55 45 0 40 5 40 15 25 60 45 5 40 35 20 25 10 0 5 10 0 5 15 25 45 55 90
