# Supplementary material for: AcconPred: Predicting Solvent Accessibility and Contact Number Simultaneously by a Multitask Learning Framework under the Conditional Neural Fields Model
Source: Biomed Res Int. 2015 Aug 3;2015:678764. doi: 10.1155/2015/678764 (PMC4538422; doi:10.1155/2015/678764)
Supplement: Supplementary file 1 — Training/testing dataset as well as the CASP11 evaluation dataset could be found in the Supplementary Material. The CASP11 evaluation dataset contains all detailed results from SPINE-X, SANN, ACCpro5 and AcconPred. [file 678764.f1.zip › Supplmentary_Files/105_casp11_domain/casp11_domain_AccPro5/T0772-D1.reso]

>T0772-D1
65 40 35 45 55 50 35 60 65 50 60 45 55 25 50 55 45 0 15 5 0 0 30 15 50 40 10 55 50 5 40 50 25 60 60 50 55 45 40 5 30 0 25 25 5 5 0 20 10 45 55 60 50 25 15 0 10 0 35 50 40 5 45 30 0 25 0 20 0 10 0 25 0 35 55 50 40 50 45 45 40 40 45 40 10 10 0 0 0 0 0 10 20 20 10 5 0 5 0 5 15 35 25 60 35 60 50 35 45 45 30 25 0 0 0 0 5 30 15 15 35 25 45 40 40 15 25 35 50 30 25 35 5 10 25 0 15 0 10 0 30 10 35 35 15 40 45 45 30 45 45 15 40 45 30 30 0 25 0 10 0 10 15 20 25 0 5 30 20 15 45 15 50 50 55 35 55 25 45 55 20 50 55 35 55 45 25 50 60 5 20 0 5 0 5 25 25 40 50 50 50 20 40 0 25 0 20 25 0 30 0 35 60 60
