# Supplementary material for: AcconPred: Predicting Solvent Accessibility and Contact Number Simultaneously by a Multitask Learning Framework under the Conditional Neural Fields Model
Source: Biomed Res Int. 2015 Aug 3;2015:678764. doi: 10.1155/2015/678764 (PMC4538422; doi:10.1155/2015/678764)
Supplement: Supplementary file 1 — Training/testing dataset as well as the CASP11 evaluation dataset could be found in the Supplementary Material. The CASP11 evaluation dataset contains all detailed results from SPINE-X, SANN, ACCpro5 and AcconPred. [file 678764.f1.zip › Supplmentary_Files/105_casp11_domain/casp11_domain_AccPro5/T0773-D1.reso]

>T0773-D1
90 45 45 10 50 15 45 15 45 45 45 55 45 0 45 55 5 10 50 40 0 35 60 50 15 45 60 35 45 20 40 40 40 50 45 45 15 55 25 45 45 50 35 50 60 45 10 55 50 5 50 60 10 15 60 60 30 45 50 55 35 45 20 45 60 65 95
