# Supplementary material for: AcconPred: Predicting Solvent Accessibility and Contact Number Simultaneously by a Multitask Learning Framework under the Conditional Neural Fields Model
Source: Biomed Res Int. 2015 Aug 3;2015:678764. doi: 10.1155/2015/678764 (PMC4538422; doi:10.1155/2015/678764)
Supplement: Supplementary file 1 — Training/testing dataset as well as the CASP11 evaluation dataset could be found in the Supplementary Material. The CASP11 evaluation dataset contains all detailed results from SPINE-X, SANN, ACCpro5 and AcconPred. [file 678764.f1.zip › Supplmentary_Files/105_casp11_domain/casp11_domain_AccPro5/T0774-D1.reso]

>T0774-D1
80 60 50 10 55 5 40 5 15 25 30 35 40 5 40 10 35 40 10 50 50 45 40 40 0 0 0 0 0 0 5 0 35 35 45 40 10 35 25 30 50 30 35 30 25 15 20 0 0 10 10 20 40 0 40 35 55 35 55 50 10 45 15 35 35 5 25 5 5 10 45 50 50 40 30 0 10 0 0 0 0 0 0 15 30 35 45 30 50 30 45 30 50 25 15 0 10 5 20 30 35 40 40 55 25 10 0 25 0 35 0 35 0 45 30 35 50 45 10 50 50 0 15 5 0 0 0 0 5 15 15 40 40 40 55 55 40 50 55 50 50 55 35 50 0 35 0 25 0 25 5 0 0 0 20 0 15 20 5 30 10 40 35 55 35 45 30 35 50 40 25 30 0 25 0 30 5 5 30 5 35 20 30 25 15 45 10 15 35 45 10 10 5 45 5 35 30 15 15 5 35 10 15 35 35 45 35 25 15 5 10 10 25 15 35 10 35 40 20 25 45 50 40 30 30 45 35 30 35 25 35 35 35 10 15 35 5 10 45 40 30 40 25 20 10 10 10 45 35 30 20 0 0 0 0 0 0 5 25 35 55 45 40 30 30 20 35 45 45 0 35 0 30 0 25 5 25 0 15 10 40 40 25 50 40 45 45 20 20 15 30 25 25 35 50 40 5 50 10 55 50 45 25 10 50 45 45 40 45 15 25 0 10 0 30 0 40 25 50 35 20 40 0 30 5 40 45 55 30 50 60 20 80
