# Supplementary material for: AcconPred: Predicting Solvent Accessibility and Contact Number Simultaneously by a Multitask Learning Framework under the Conditional Neural Fields Model
Source: Biomed Res Int. 2015 Aug 3;2015:678764. doi: 10.1155/2015/678764 (PMC4538422; doi:10.1155/2015/678764)
Supplement: Supplementary file 1 — Training/testing dataset as well as the CASP11 evaluation dataset could be found in the Supplementary Material. The CASP11 evaluation dataset contains all detailed results from SPINE-X, SANN, ACCpro5 and AcconPred. [file 678764.f1.zip › Supplmentary_Files/105_casp11_domain/casp11_domain_AccPro5/T0776-D1.reso]

>T0776-D1
85 60 55 15 50 20 55 60 60 30 20 0 0 0 0 0 5 5 0 5 30 15 20 35 35 35 45 40 40 40 25 40 25 25 35 35 20 25 30 10 0 0 20 5 0 15 40 15 0 35 50 45 15 40 50 30 35 5 30 0 5 0 15 0 5 25 15 30 25 0 25 30 0 5 40 20 0 30 45 30 0 10 45 25 35 5 20 0 0 0 0 0 0 0 0 0 0 0 10 25 30 15 50 50 55 45 55 30 35 20 45 35 0 25 50 10 0 35 40 0 0 45 30 0 25 55 50 20 50 55 0 20 0 0 0 0 0 0 10 15 10 40 35 45 40 35 40 50 40 40 40 10 25 50 25 0 40 40 0 10 45 5 0 35 40 0 0 50 45 20 40 0 20 0 0 15 0 10 30 10 0 30 45 25 10 55 55 35 45 35 45 20 5 10 40 10 15 0 5 5 20 45 45 0 10 30 10 0 0 35 20 0 0 45 20 10 35 35 75
