# Supplementary material for: AcconPred: Predicting Solvent Accessibility and Contact Number Simultaneously by a Multitask Learning Framework under the Conditional Neural Fields Model
Source: Biomed Res Int. 2015 Aug 3;2015:678764. doi: 10.1155/2015/678764 (PMC4538422; doi:10.1155/2015/678764)
Supplement: Supplementary file 1 — Training/testing dataset as well as the CASP11 evaluation dataset could be found in the Supplementary Material. The CASP11 evaluation dataset contains all detailed results from SPINE-X, SANN, ACCpro5 and AcconPred. [file 678764.f1.zip › Supplmentary_Files/105_casp11_domain/casp11_domain_AccPro5/T0777-D1.reso]

>T0777-D1
75 30 30 15 15 30 20 5 35 40 40 30 10 10 30 15 5 50 50 10 40 60 35 5 45 50 5 45 10 55 50 30 35 15 5 0 10 0 5 25 5 20 30 5 5 30 0 0 15 0 0 0 30 25 0 25 50 10 0 35 40 5 10 50 55 25 40 30 0 0 0 0 0 0 0 0 5 5 10 15 20 15 30 5 5 15 0 10 30 15 30 45 25 15 25 5 10 20 40 30 50 35 35 20 5 0 5 5 20 0 0 0 0 0 0 5 0 0 0 0 0 0 0 0 0 0 0 5 25 5 40 5 0 30 40 15 50 25 35 0 30 0 10 35 35 60 60 40 30 20 45 5 0 15 30 10 45 35 0 35 55 35 5 30 45 0 0 45 35 0 35 40 0 0 40 15 0 30 50 30 60 60 55 50 60 50 35 50 30 40 45 0 5 35 10 0 0 40 0 0 15 20 0 0 40 20 0 15 55 25 0 40 50 25 10 45 15 15 30 45 45 25 30 40 5 45 40 30 5 0 15 0 0 15 0 0 0 0 0 20 0 30 10 35 5 35 30 0 15 40 5 10 50 45 5 10 30 20 5 0 25 45 35 30 30 10 10 10 0 40 25 0 25 60 35 25 35 10 0 0 0 0 0 15 5 0 20 35 0 15 50 10 10 30 20 5 0 0 20 0 0 30 35 0 5 35 25 50 40 0 20 50 30 0 25 45 0 0 35 30 0 0 20 30 25 45 25 45 15 0 10 25 0 0 35 0 5 25 40 25 40 35 50 35 85
