# Supplementary material for: AcconPred: Predicting Solvent Accessibility and Contact Number Simultaneously by a Multitask Learning Framework under the Conditional Neural Fields Model
Source: Biomed Res Int. 2015 Aug 3;2015:678764. doi: 10.1155/2015/678764 (PMC4538422; doi:10.1155/2015/678764)
Supplement: Supplementary file 1 — Training/testing dataset as well as the CASP11 evaluation dataset could be found in the Supplementary Material. The CASP11 evaluation dataset contains all detailed results from SPINE-X, SANN, ACCpro5 and AcconPred. [file 678764.f1.zip › Supplmentary_Files/105_casp11_domain/casp11_domain_AccPro5/T0780-D1.reso]

>T0780-D1
85 45 55 50 40 10 55 55 5 40 5 35 0 35 10 35 50 50 40 10 10 0 15 30 15 45 50 55 0 45 0 40 0 50 25 45 45 30 5 30 10 25 15 45 30 30 55 50 30 40 45 0 35 0 10 0 20 0 50 65 15 60 65 30 55 25 50 5 45 0 40 15 50 55 10 45 65 55 5 45 10 50 5 40 35 55 50 5 45 5 45 5 50 65 85
