# Supplementary material for: AcconPred: Predicting Solvent Accessibility and Contact Number Simultaneously by a Multitask Learning Framework under the Conditional Neural Fields Model
Source: Biomed Res Int. 2015 Aug 3;2015:678764. doi: 10.1155/2015/678764 (PMC4538422; doi:10.1155/2015/678764)
Supplement: Supplementary file 1 — Training/testing dataset as well as the CASP11 evaluation dataset could be found in the Supplementary Material. The CASP11 evaluation dataset contains all detailed results from SPINE-X, SANN, ACCpro5 and AcconPred. [file 678764.f1.zip › Supplmentary_Files/105_casp11_domain/casp11_domain_AccPro5/T0780-D2.reso]

>T0780-D2
95 70 60 55 60 15 60 15 25 30 50 15 35 45 50 50 15 35 45 25 0 30 5 35 30 5 35 10 30 40 55 45 5 30 10 30 30 45 40 55 20 10 55 45 0 35 40 0 5 15 5 5 30 40 30 50 50 10 40 35 45 20 45 35 40 10 30 10 45 20 10 40 55 45 25 30 10 5 20 15 10 5 20 25 15 40 25 20 10 45 10 35 45 55 65 85
