# Supplementary material for: AcconPred: Predicting Solvent Accessibility and Contact Number Simultaneously by a Multitask Learning Framework under the Conditional Neural Fields Model
Source: Biomed Res Int. 2015 Aug 3;2015:678764. doi: 10.1155/2015/678764 (PMC4538422; doi:10.1155/2015/678764)
Supplement: Supplementary file 1 — Training/testing dataset as well as the CASP11 evaluation dataset could be found in the Supplementary Material. The CASP11 evaluation dataset contains all detailed results from SPINE-X, SANN, ACCpro5 and AcconPred. [file 678764.f1.zip › Supplmentary_Files/105_casp11_domain/casp11_domain_AccPro5/T0781-D1.reso]

>T0781-D1
80 60 60 40 20 50 60 50 40 50 10 35 40 15 40 50 45 40 45 0 0 5 15 0 0 40 5 0 45 60 50 30 5 40 45 10 0 25 10 0 5 5 20 25 10 5 0 10 0 25 5 0 50 40 0 60 45 5 20 10 25 10 20 0 40 20 45 15 30 40 35 40 15 15 30 10 10 50 5 5 0 20 40 5 0 60 45 0 10 55 30 0 50 60 0 25 55 45 5 60 50 10 45 50 10 30 5 40 35 5 0 45 50 45 60 55 45 35 30 50 45 5 5 45 10 10 10 15 40 10 5 35 35 0 20 0 10 0 40 5 55 55 40 30 15 35 0 5 0 5 0 0 20 10 50 55 35 5 35 0 20 20 5 45 50 5 5 30 30 35 25 35 20 40 20 25 5 45 15 50 45 10 45 50 10 50 50 35 20 25 10 30 45 40 15 45 45 50 65 75
