# Supplementary material for: AcconPred: Predicting Solvent Accessibility and Contact Number Simultaneously by a Multitask Learning Framework under the Conditional Neural Fields Model
Source: Biomed Res Int. 2015 Aug 3;2015:678764. doi: 10.1155/2015/678764 (PMC4538422; doi:10.1155/2015/678764)
Supplement: Supplementary file 1 — Training/testing dataset as well as the CASP11 evaluation dataset could be found in the Supplementary Material. The CASP11 evaluation dataset contains all detailed results from SPINE-X, SANN, ACCpro5 and AcconPred. [file 678764.f1.zip › Supplmentary_Files/105_casp11_domain/casp11_domain_AccPro5/T0781-D2.reso]

>T0781-D2
65 55 30 30 35 20 45 55 55 30 35 55 40 0 0 35 30 0 0 35 5 0 40 50 25 35 5 20 35 0 0 0 10 0 15 45 45 30 45 60 55 35 30 35 50 15 5 55 55 20 55 50 5 5 55 30 0 30 35 5 0 5 0 5 10 25 40 45 30 0 35 5 15 25 45 30 55 55 30 10 45 45 0 25 55 50 5 35 35 40 5 0 0 5 0 10 0 10 30 5 0 15 0 30 45 50 60 55 55 50 30 15 45 20 5 0 0 0 0 5 10 15 10 40 25 10 0 0 0 5 5 0 10 45 45 60 50 15 5 25 0 15 5 5 35 20 65 40 15 40 40 35 40 35 30 0 30 35 10 20 55 55 40 50 35 50 55 25 45 55 40 15 35 65 95
