# Supplementary material for: AcconPred: Predicting Solvent Accessibility and Contact Number Simultaneously by a Multitask Learning Framework under the Conditional Neural Fields Model
Source: Biomed Res Int. 2015 Aug 3;2015:678764. doi: 10.1155/2015/678764 (PMC4538422; doi:10.1155/2015/678764)
Supplement: Supplementary file 1 — Training/testing dataset as well as the CASP11 evaluation dataset could be found in the Supplementary Material. The CASP11 evaluation dataset contains all detailed results from SPINE-X, SANN, ACCpro5 and AcconPred. [file 678764.f1.zip › Supplmentary_Files/105_casp11_domain/casp11_domain_AccPro5/T0782-D1.reso]

>T0782-D1
95 65 35 50 55 45 15 35 10 35 45 15 35 20 45 55 40 50 25 45 50 20 25 15 0 5 10 30 5 35 50 20 20 0 5 0 0 0 0 15 45 55 35 50 15 30 10 0 10 10 30 10 45 10 45 55 40 40 0 0 0 5 0 0 10 40 25 10 45 40 55 40 10 45 35 10 5 30 10 60 55 25 50 20 25 0 40 5 40 45 10 35 40 50 45 5 30 10 40 15 45 25 10 35 25 0 5 35 55 65
