# Supplementary material for: AcconPred: Predicting Solvent Accessibility and Contact Number Simultaneously by a Multitask Learning Framework under the Conditional Neural Fields Model
Source: Biomed Res Int. 2015 Aug 3;2015:678764. doi: 10.1155/2015/678764 (PMC4538422; doi:10.1155/2015/678764)
Supplement: Supplementary file 1 — Training/testing dataset as well as the CASP11 evaluation dataset could be found in the Supplementary Material. The CASP11 evaluation dataset contains all detailed results from SPINE-X, SANN, ACCpro5 and AcconPred. [file 678764.f1.zip › Supplmentary_Files/105_casp11_domain/casp11_domain_AccPro5/T0783-D1.reso]

>T0783-D1
85 40 50 55 45 30 0 0 0 0 0 0 0 5 15 40 20 45 25 10 55 35 60 20 35 40 20 0 10 45 5 40 50 25 15 0 0 5 10 0 0 30 15 0 20 45 15 25 35 30 30 15 0 0 0 0 0 10 30 45 25 25 45 20 10 35 45 5 5 40 45 15 50 25 45 35 15 15 5 0 30 20 15 40 40 10 15 35 0 0 15 20 0 0 35 15 0 25 50 35 20 35 40 30 45 25 35 45 25 15 0 0 0 0 0 0 0 0 5 0 5 0 25 35 45 5 0 40 35 0 10 45 15 0 45 50 20 40 20 0 0 0 0 0 20 5 25 25 10 0 30 25 15 45 35 55 45 30 25 30 45 10 20 40 10 35 25 0 10 10 0 20 5 35 20 5 0 25 5 35 15 0 20 40 0 0 45 40 0 30 60 50 45 20 50 20 10 35 40 10 0 15 5 0 5 30 20 15 55 25 40 0 25 0 0 50 20 40 40 45 10 0 35 0 20 20 50 45 5 0 40 10 0 30 30 0 0 45 50 35 35 70 90
