# Supplementary material for: AcconPred: Predicting Solvent Accessibility and Contact Number Simultaneously by a Multitask Learning Framework under the Conditional Neural Fields Model
Source: Biomed Res Int. 2015 Aug 3;2015:678764. doi: 10.1155/2015/678764 (PMC4538422; doi:10.1155/2015/678764)
Supplement: Supplementary file 1 — Training/testing dataset as well as the CASP11 evaluation dataset could be found in the Supplementary Material. The CASP11 evaluation dataset contains all detailed results from SPINE-X, SANN, ACCpro5 and AcconPred. [file 678764.f1.zip › Supplmentary_Files/105_casp11_domain/casp11_domain_AccPro5/T0783-D2.reso]

>T0783-D2
70 25 0 0 0 15 35 25 55 50 40 35 55 20 0 15 35 20 0 45 50 10 0 50 55 30 5 50 35 0 45 5 15 20 35 30 5 50 45 0 15 10 0 0 0 0 15 20 35 45 30 35 10 45 30 0 25 45 0 5 50 15 0 45 55 30 40 10 10 20 0 10 5 0 0 0 0 0 0 15 0 20 20 20 50 35 30 40 30 40 35 55 10 45 45 5 20 40 0 30 50 5 0 55 45 0 40 55 35 15 0 0 0 5 0 0 15 0 25 10 40 55 45 50 50 40 0 40 55 10 5 50 35 0 0 15 0 0 0 5 5 5 45 50 35 40 35 50 10 15 10 25 5 25 40 75
