# Supplementary material for: AcconPred: Predicting Solvent Accessibility and Contact Number Simultaneously by a Multitask Learning Framework under the Conditional Neural Fields Model
Source: Biomed Res Int. 2015 Aug 3;2015:678764. doi: 10.1155/2015/678764 (PMC4538422; doi:10.1155/2015/678764)
Supplement: Supplementary file 1 — Training/testing dataset as well as the CASP11 evaluation dataset could be found in the Supplementary Material. The CASP11 evaluation dataset contains all detailed results from SPINE-X, SANN, ACCpro5 and AcconPred. [file 678764.f1.zip › Supplmentary_Files/105_casp11_domain/casp11_domain_AccPro5/T0784-D1.reso]

>T0784-D1
95 55 50 35 5 15 35 0 5 0 35 25 30 40 45 30 35 35 5 30 0 5 0 0 0 0 0 5 30 55 40 25 15 20 45 5 10 50 55 60 25 50 15 10 20 30 15 20 10 0 30 35 0 40 55 15 50 5 20 0 15 40 45 60 50 5 5 0 0 0 0 10 15 20 5 20 15 20 10 45 40 10 30 50 40 0 35 0 5 0 5 0 10 5 30 45 55 40 10 45 45 5 35 55 40 10 30 40 55 30 45 25 5 10 35 35 5 45 30 35 30 55 60 40 80
