# Supplementary material for: AcconPred: Predicting Solvent Accessibility and Contact Number Simultaneously by a Multitask Learning Framework under the Conditional Neural Fields Model
Source: Biomed Res Int. 2015 Aug 3;2015:678764. doi: 10.1155/2015/678764 (PMC4538422; doi:10.1155/2015/678764)
Supplement: Supplementary file 1 — Training/testing dataset as well as the CASP11 evaluation dataset could be found in the Supplementary Material. The CASP11 evaluation dataset contains all detailed results from SPINE-X, SANN, ACCpro5 and AcconPred. [file 678764.f1.zip › Supplmentary_Files/105_casp11_domain/casp11_domain_AccPro5/T0785-D1.reso]

>T0785-D1
80 70 55 45 50 55 55 45 30 20 45 15 5 55 45 10 45 60 50 55 40 10 30 5 0 5 35 25 30 45 55 35 10 40 50 10 20 45 25 10 0 5 10 15 25 30 45 40 20 45 30 40 15 55 25 45 30 40 45 45 5 25 40 15 5 40 40 25 35 55 15 25 5 0 0 0 5 20 15 25 25 10 5 0 15 5 35 40 10 10 5 25 5 30 5 20 45 40 15 45 55 30 35 50 40 25 30 15 25 25 50 85
