# Supplementary material for: AcconPred: Predicting Solvent Accessibility and Contact Number Simultaneously by a Multitask Learning Framework under the Conditional Neural Fields Model
Source: Biomed Res Int. 2015 Aug 3;2015:678764. doi: 10.1155/2015/678764 (PMC4538422; doi:10.1155/2015/678764)
Supplement: Supplementary file 1 — Training/testing dataset as well as the CASP11 evaluation dataset could be found in the Supplementary Material. The CASP11 evaluation dataset contains all detailed results from SPINE-X, SANN, ACCpro5 and AcconPred. [file 678764.f1.zip › Supplmentary_Files/105_casp11_domain/casp11_domain_AccPro5/T0786-D1.reso]

>T0786-D1
70 30 20 50 55 60 40 40 15 0 5 0 30 25 40 10 45 25 0 45 50 5 15 15 0 0 0 0 10 5 40 50 15 45 50 45 10 20 45 10 30 45 55 25 0 25 45 0 0 35 10 0 0 40 20 0 30 45 0 35 60 35 60 45 5 30 0 0 0 0 0 20 15 25 10 25 25 15 25 15 10 0 30 5 0 5 0 0 0 0 0 0 35 40 25 30 5 20 45 30 0 35 45 45 25 0 45 15 15 35 0 20 50 50 40 40 0 35 0 20 0 10 35 25 5 10 10 0 0 5 5 0 0 0 20 0 30 45 30 55 40 0 40 35 0 0 45 15 0 25 35 0 0 30 5 0 0 30 25 10 25 50 50 5 40 5 0 0 0 0 0 5 30 20 45 40 35 0 5 0 15 0 0 0 15 0 10 0 5 0 5 5 0 0 5 35 0 25 20 15 25 40 50 10 45 45 10 25 45 45 0 30 55 25 10 60 85
