# Supplementary material for: AcconPred: Predicting Solvent Accessibility and Contact Number Simultaneously by a Multitask Learning Framework under the Conditional Neural Fields Model
Source: Biomed Res Int. 2015 Aug 3;2015:678764. doi: 10.1155/2015/678764 (PMC4538422; doi:10.1155/2015/678764)
Supplement: Supplementary file 1 — Training/testing dataset as well as the CASP11 evaluation dataset could be found in the Supplementary Material. The CASP11 evaluation dataset contains all detailed results from SPINE-X, SANN, ACCpro5 and AcconPred. [file 678764.f1.zip › Supplmentary_Files/105_casp11_domain/casp11_domain_AccPro5/T0789-D1.reso]

>T0789-D1
80 50 20 40 5 10 0 20 10 0 5 5 0 0 25 25 10 30 30 25 40 10 25 5 30 0 0 0 10 10 10 15 15 25 20 15 40 30 40 50 5 15 40 40 0 20 50 25 0 25 40 5 5 10 15 30 55 55 30 40 5 35 50 35 0 5 45 15 0 25 0 0 0 15 0 30 20 0 0 20 0 15 15 0 5 25 15 35 15 35 20 10 5 40 15 0 15 0 0 0 0 20 25 35 45 45 45 60 55 45 30 30 0 0 0 0 0 15 15 0 5 0 0 10 0 15 30 10 40 10 45 25 25 40 10 0 0 15 0 5 35 35 85
