# Supplementary material for: AcconPred: Predicting Solvent Accessibility and Contact Number Simultaneously by a Multitask Learning Framework under the Conditional Neural Fields Model
Source: Biomed Res Int. 2015 Aug 3;2015:678764. doi: 10.1155/2015/678764 (PMC4538422; doi:10.1155/2015/678764)
Supplement: Supplementary file 1 — Training/testing dataset as well as the CASP11 evaluation dataset could be found in the Supplementary Material. The CASP11 evaluation dataset contains all detailed results from SPINE-X, SANN, ACCpro5 and AcconPred. [file 678764.f1.zip › Supplmentary_Files/105_casp11_domain/casp11_domain_AccPro5/T0789-D2.reso]

>T0789-D2
75 70 55 40 30 45 55 45 10 45 45 10 50 10 30 30 55 30 15 40 40 0 25 45 20 0 35 40 15 0 40 0 25 35 0 0 45 35 5 35 5 40 50 35 0 25 45 0 0 25 0 0 20 30 15 55 25 5 20 0 10 0 15 10 35 15 30 50 50 60 60 45 40 25 50 40 0 5 0 5 0 0 15 5 30 0 0 15 0 0 0 5 15 40 50 30 50 60 45 45 15 5 0 15 5 10 35 30 35 20 5 0 0 0 0 0 0 30 45 5 35 50 30 20 60 95
