# Supplementary material for: AcconPred: Predicting Solvent Accessibility and Contact Number Simultaneously by a Multitask Learning Framework under the Conditional Neural Fields Model
Source: Biomed Res Int. 2015 Aug 3;2015:678764. doi: 10.1155/2015/678764 (PMC4538422; doi:10.1155/2015/678764)
Supplement: Supplementary file 1 — Training/testing dataset as well as the CASP11 evaluation dataset could be found in the Supplementary Material. The CASP11 evaluation dataset contains all detailed results from SPINE-X, SANN, ACCpro5 and AcconPred. [file 678764.f1.zip › Supplmentary_Files/105_casp11_domain/casp11_domain_AccPro5/T0790-D1.reso]

>T0790-D1
95 50 45 55 15 10 40 5 10 5 25 10 0 5 0 0 0 20 20 5 25 25 25 40 10 20 5 25 0 0 0 10 15 15 15 20 30 30 15 35 20 40 50 5 15 40 45 0 20 55 30 0 25 40 5 5 10 15 30 55 55 30 40 5 35 50 35 0 5 45 15 0 30 0 0 0 20 0 35 25 5 0 20 0 20 15 0 35 45 10 25 45 20 0 20 5 0 0 0 30 35 35 60 45 5 0 0 0 0 15 20 0 10 0 0 15 5 15 30 15 40 10 50 25 40 40 10 0 0 15 0 5 35 40 90
