# Supplementary material for: AcconPred: Predicting Solvent Accessibility and Contact Number Simultaneously by a Multitask Learning Framework under the Conditional Neural Fields Model
Source: Biomed Res Int. 2015 Aug 3;2015:678764. doi: 10.1155/2015/678764 (PMC4538422; doi:10.1155/2015/678764)
Supplement: Supplementary file 1 — Training/testing dataset as well as the CASP11 evaluation dataset could be found in the Supplementary Material. The CASP11 evaluation dataset contains all detailed results from SPINE-X, SANN, ACCpro5 and AcconPred. [file 678764.f1.zip › Supplmentary_Files/105_casp11_domain/casp11_domain_AccPro5/T0790-D2.reso]

>T0790-D2
70 60 65 45 50 35 10 50 10 40 50 5 40 5 5 5 40 30 0 5 50 20 10 55 35 0 30 50 20 25 45 0 5 35 0 0 30 30 0 15 5 35 35 45 20 5 40 5 0 10 10 0 5 20 35 10 20 5 10 0 0 0 0 0 5 10 20 40 45 50 40 30 20 40 15 45 0 0 0 0 0 0 10 5 45 30 0 10 0 0 0 0 10 20 45 20 40 50 35 30 5 5 0 5 0 30 30 35 40 45 25 20 0 15 35 0 0 40 35 0 10 55 35 10 45 65 50 45 35 55
