# Supplementary material for: AcconPred: Predicting Solvent Accessibility and Contact Number Simultaneously by a Multitask Learning Framework under the Conditional Neural Fields Model
Source: Biomed Res Int. 2015 Aug 3;2015:678764. doi: 10.1155/2015/678764 (PMC4538422; doi:10.1155/2015/678764)
Supplement: Supplementary file 1 — Training/testing dataset as well as the CASP11 evaluation dataset could be found in the Supplementary Material. The CASP11 evaluation dataset contains all detailed results from SPINE-X, SANN, ACCpro5 and AcconPred. [file 678764.f1.zip › Supplmentary_Files/105_casp11_domain/casp11_domain_AccPro5/T0791-D1.reso]

>T0791-D1
95 55 45 45 5 35 0 30 5 30 0 5 10 0 0 20 5 5 15 35 0 40 30 5 5 40 45 5 35 10 25 10 20 10 25 30 35 35 55 20 5 40 20 0 30 35 15 10 5 10 40 35 35 40 5 25 55 30 0 10 40 20 0 35 0 5 5 10 25 35 5 15 0 0 0 0 0 0 20 5 40 5 0 20 0 20 0 30 25 60 50 45 30 40 30 30 35 40 10 40 55 50 30 0 20 0 0 0 5 30 35 45 40 30 5 0 0 0 0 25 5 20 40 35 0 15 0 20 15 0 30 15 40 40 30 45 10 0 15 30 0 0 10 45 10 5 50 55 75
