# Supplementary material for: AcconPred: Predicting Solvent Accessibility and Contact Number Simultaneously by a Multitask Learning Framework under the Conditional Neural Fields Model
Source: Biomed Res Int. 2015 Aug 3;2015:678764. doi: 10.1155/2015/678764 (PMC4538422; doi:10.1155/2015/678764)
Supplement: Supplementary file 1 — Training/testing dataset as well as the CASP11 evaluation dataset could be found in the Supplementary Material. The CASP11 evaluation dataset contains all detailed results from SPINE-X, SANN, ACCpro5 and AcconPred. [file 678764.f1.zip › Supplmentary_Files/105_casp11_domain/casp11_domain_AccPro5/T0791-D2.reso]

>T0791-D2
75 65 30 30 30 35 40 5 35 20 10 30 5 25 10 45 30 0 20 50 0 0 45 10 10 25 55 10 25 40 35 15 15 50 35 10 40 0 20 30 5 15 0 25 5 5 0 0 25 35 0 5 50 15 5 55 35 20 10 0 15 0 0 0 5 0 20 15 20 30 30 40 50 60 40 25 25 10 5 0 0 20 0 45 30 35 45 40 5 20 0 0 0 5 30 20 10 35 45 50 35 25 40 30 0 0 0 0 0 20 25 20 20 45 15 0 15 20 0 0 40 25 5 5 40 35 15 45 25 45 45 15 50 50 30 55 55 80
