# Supplementary material for: AcconPred: Predicting Solvent Accessibility and Contact Number Simultaneously by a Multitask Learning Framework under the Conditional Neural Fields Model
Source: Biomed Res Int. 2015 Aug 3;2015:678764. doi: 10.1155/2015/678764 (PMC4538422; doi:10.1155/2015/678764)
Supplement: Supplementary file 1 — Training/testing dataset as well as the CASP11 evaluation dataset could be found in the Supplementary Material. The CASP11 evaluation dataset contains all detailed results from SPINE-X, SANN, ACCpro5 and AcconPred. [file 678764.f1.zip › Supplmentary_Files/105_casp11_domain/casp11_domain_AccPro5/T0792-D1.reso]

>T0792-D1
90 55 40 25 5 40 5 30 55 50 20 40 45 10 35 30 25 0 20 0 5 0 10 10 30 15 40 50 30 5 35 5 30 40 5 40 60 45 5 35 60 25 35 35 40 25 5 25 10 20 40 35 0 25 40 5 0 5 30 5 30 40 5 30 35 35 5 30 60 55 20 55 40 10 10 50 35 85
