# Supplementary material for: AcconPred: Predicting Solvent Accessibility and Contact Number Simultaneously by a Multitask Learning Framework under the Conditional Neural Fields Model
Source: Biomed Res Int. 2015 Aug 3;2015:678764. doi: 10.1155/2015/678764 (PMC4538422; doi:10.1155/2015/678764)
Supplement: Supplementary file 1 — Training/testing dataset as well as the CASP11 evaluation dataset could be found in the Supplementary Material. The CASP11 evaluation dataset contains all detailed results from SPINE-X, SANN, ACCpro5 and AcconPred. [file 678764.f1.zip › Supplmentary_Files/105_casp11_domain/casp11_domain_AccPro5/T0794-D1.reso]

>T0794-D1
80 50 30 0 15 0 0 0 0 10 10 15 15 25 15 35 55 45 50 60 45 55 25 45 45 45 45 5 15 45 25 5 35 50 0 0 50 30 0 25 45 5 0 45 45 0 30 60 45 20 0 20 0 0 0 0 0 5 5 0 0 5 5 10 30 15 35 20 40 35 0 15 45 10 0 40 40 5 40 50 30 45 30 25 15 10 20 5 35 35 35 45 40 15 50 35 20 40 0 0 35 15 0 15 10 0 0 35 45 10 15 0 0 0 0 0 0 0 10 20 30 30 45 10 55 50 50 45 60 55 5 40 65 45 35 25 15 5 0 0 0 0 0 0 0 10 40 50 5 30 0 5 0 20 0 10 20 10 5 5 5 15 40 20 45 30 10 25 30 35 55 50 35 45 10 10 0 0 35 5 45 5 5 15 0 0 0 0 0 0 0 0 0 10 5 15 25 10 0 15 25 0 0 30 40 25 35 0 25 0 0 0 0 0 0 0 0 5 15 20 10 15 5 0 10 0 5 20 0 5 20 0 5 0 15 15 10 15 0 0 0 0 0 0 10 10 30 30 25 40 20 15 5 5 0 0 0 0 0 0 10 45 35 15 20 0 10 10 10 25 20 55 50 60 55 30 25 0 0 0 0 40 5 55 60 50 60 95
