# Supplementary material for: AcconPred: Predicting Solvent Accessibility and Contact Number Simultaneously by a Multitask Learning Framework under the Conditional Neural Fields Model
Source: Biomed Res Int. 2015 Aug 3;2015:678764. doi: 10.1155/2015/678764 (PMC4538422; doi:10.1155/2015/678764)
Supplement: Supplementary file 1 — Training/testing dataset as well as the CASP11 evaluation dataset could be found in the Supplementary Material. The CASP11 evaluation dataset contains all detailed results from SPINE-X, SANN, ACCpro5 and AcconPred. [file 678764.f1.zip › Supplmentary_Files/105_casp11_domain/casp11_domain_AccPro5/T0794-D2.reso]

>T0794-D2
75 35 10 30 10 15 5 20 15 45 45 30 55 45 20 35 45 60 45 60 50 0 35 35 25 0 20 25 15 40 5 10 0 10 35 0 40 50 50 60 45 45 10 25 0 0 25 50 35 0 0 0 25 0 25 5 40 20 35 50 55 25 30 45 20 0 0 0 0 0 0 5 20 10 15 15 15 10 40 20 25 10 0 0 0 0 0 0 0 0 25 0 50 45 45 55 25 50 45 5 35 50 50 10 45 50 0 30 25 30 0 35 35 0 30 5 40 15 45 5 40 25 35 15 0 0 0 5 0 0 0 10 40 5 25 5 25 35 50 50 25 35 35 15 55 40 30 30 10 20 45 45 55 45 30 55 30 15 0 0 0 0 0 0 0 0 20 15 15 45 60 85
