# Supplementary material for: AcconPred: Predicting Solvent Accessibility and Contact Number Simultaneously by a Multitask Learning Framework under the Conditional Neural Fields Model
Source: Biomed Res Int. 2015 Aug 3;2015:678764. doi: 10.1155/2015/678764 (PMC4538422; doi:10.1155/2015/678764)
Supplement: Supplementary file 1 — Training/testing dataset as well as the CASP11 evaluation dataset could be found in the Supplementary Material. The CASP11 evaluation dataset contains all detailed results from SPINE-X, SANN, ACCpro5 and AcconPred. [file 678764.f1.zip › Supplmentary_Files/105_casp11_domain/casp11_domain_AccPro5/T0796-D1.reso]

>T0796-D1
75 35 25 35 0 40 40 10 0 10 30 0 0 20 15 15 10 20 50 35 40 50 30 5 50 20 20 25 5 35 25 5 0 15 15 30 20 5 35 35 10 0 10 20 20 35 25 30 35 15 5 25 40 40 35 50 5 45 30 20 10 25 10 15 5 5 0 10 40 25 5 40 35 45 35 50 40 50 30 25 35 40 0 40 5 30 50 50 40 40 50 25 25 20 40 25 20 45 50 15 5 50 25 40 25 50 5 45 40 15 15 55 15 45 0 45 0 35 0 45 5 5 15 50 35 40 10 50 20 35 0 35 0 30 0 25 10 30 15 15 20 20 25 20 45 20 25 25 15 25 30 45 30 15 5 40 0 5 20 20 0 15 0 5 20 35 40 25 0 10 0 0 0 5 0 5 45 5 50 0 30 0 0 0 20 0 20 0 25 0 35 15 45 40 10 20 20 15 10 5 5 0 0 5 0 0 10 5 30 20 35 15 25 35 15 0 0 0 0 0 0 5 30 5 50 55 25 45 10 15 0 35 5 15 50 35 40 45 10 0 10 0 20 0 15 0 15 5 30 0 5 15 0 0 0 0 0 0 15 5 35 35 30 35 10 35 45 15 45 45 50 50 30 45 20 15 20 30 35 0 20 0 25 45 20 45 30 0 20 0 35 30 5 40 55 75
