# Supplementary material for: AcconPred: Predicting Solvent Accessibility and Contact Number Simultaneously by a Multitask Learning Framework under the Conditional Neural Fields Model
Source: Biomed Res Int. 2015 Aug 3;2015:678764. doi: 10.1155/2015/678764 (PMC4538422; doi:10.1155/2015/678764)
Supplement: Supplementary file 1 — Training/testing dataset as well as the CASP11 evaluation dataset could be found in the Supplementary Material. The CASP11 evaluation dataset contains all detailed results from SPINE-X, SANN, ACCpro5 and AcconPred. [file 678764.f1.zip › Supplmentary_Files/105_casp11_domain/casp11_domain_AccPro5/T0800-D1.reso]

>T0800-D1
75 55 60 55 50 20 50 15 25 45 55 55 50 5 45 50 0 35 0 30 0 40 5 25 0 0 30 0 30 0 45 50 45 40 50 40 5 0 40 5 35 5 45 35 55 35 60 55 15 35 30 45 10 45 25 45 35 55 60 55 45 15 35 0 30 0 40 15 55 55 45 55 50 25 45 5 45 20 45 55 45 50 25 45 0 30 0 30 0 15 55 50 5 15 0 20 0 25 0 35 0 20 0 5 35 0 30 0 25 0 35 45 5 35 0 40 45 0 35 0 40 5 15 0 0 25 0 25 0 35 0 35 50 55 35 50 50 40 5 40 0 30 0 35 5 15 0 0 35 0 20 0 20 0 5 45 40 5 15 0 25 0 30 5 35 45 10 5 25 30 25 35 0 55 55 15 25 45 50 60 60 50 25 10 25 10 50 45 15 50 60 20 50 50 35 0 30 0 30 0 40 10 20 10 15 40 5 40 5 40 50 80
