# Supplementary material for: AcconPred: Predicting Solvent Accessibility and Contact Number Simultaneously by a Multitask Learning Framework under the Conditional Neural Fields Model
Source: Biomed Res Int. 2015 Aug 3;2015:678764. doi: 10.1155/2015/678764 (PMC4538422; doi:10.1155/2015/678764)
Supplement: Supplementary file 1 — Training/testing dataset as well as the CASP11 evaluation dataset could be found in the Supplementary Material. The CASP11 evaluation dataset contains all detailed results from SPINE-X, SANN, ACCpro5 and AcconPred. [file 678764.f1.zip › Supplmentary_Files/105_casp11_domain/casp11_domain_AccPro5/T0801-D1.reso]

>T0801-D1
85 45 35 40 35 40 10 40 55 50 10 15 50 20 0 25 45 0 0 45 35 40 25 5 10 40 40 20 55 30 0 45 40 0 10 50 35 0 15 50 20 5 50 10 40 15 0 0 0 0 0 5 0 5 5 0 0 5 0 0 0 15 0 5 50 10 50 60 50 30 25 0 0 0 0 0 5 0 0 0 0 0 0 5 0 0 5 10 5 25 0 25 0 5 0 0 5 0 25 50 40 20 5 15 0 15 10 50 30 0 30 50 30 0 35 60 40 0 25 0 0 0 0 0 0 0 5 0 10 5 5 25 0 40 30 0 20 45 10 0 45 50 20 15 0 25 0 0 5 5 0 0 20 5 5 5 5 40 15 50 40 40 25 10 5 10 5 0 5 0 0 0 0 0 0 10 5 15 25 15 0 0 0 10 5 15 0 0 0 0 0 0 25 15 45 40 0 5 45 15 0 30 20 0 20 45 20 20 25 35 20 35 30 15 15 5 30 5 25 0 15 25 0 0 0 0 0 0 5 5 10 0 45 35 0 40 50 5 5 45 30 0 30 40 0 0 45 20 0 25 50 15 0 50 55 10 55 55 25 40 25 5 40 10 25 55 25 45 60 50 15 35 5 0 0 0 0 0 0 0 10 0 30 45 40 50 40 10 40 35 0 10 45 20 0 40 60 40 45 5 45 0 20 15 15 5 10 0 5 10 25 5 35 5 0 35 45 10 45 35 35 50 45 50 5 40 20 0 30 35 0 0 40 20 0 0 0 0 0 0 15 20 40 5 35 50 55 25 0 40 30 0 0 45 15 0 35 50 25 55
