# Supplementary material for: AcconPred: Predicting Solvent Accessibility and Contact Number Simultaneously by a Multitask Learning Framework under the Conditional Neural Fields Model
Source: Biomed Res Int. 2015 Aug 3;2015:678764. doi: 10.1155/2015/678764 (PMC4538422; doi:10.1155/2015/678764)
Supplement: Supplementary file 1 — Training/testing dataset as well as the CASP11 evaluation dataset could be found in the Supplementary Material. The CASP11 evaluation dataset contains all detailed results from SPINE-X, SANN, ACCpro5 and AcconPred. [file 678764.f1.zip › Supplmentary_Files/105_casp11_domain/casp11_domain_AccPro5/T0803-D1.reso]

>T0803-D1
95 65 35 50 55 40 50 25 40 40 20 50 40 40 15 45 35 5 40 40 25 0 15 35 20 15 35 40 35 50 60 10 45 25 30 35 50 40 40 35 20 10 45 10 0 30 30 10 10 50 40 10 45 55 50 30 45 15 45 35 40 15 35 0 10 45 10 15 35 45 5 0 0 35 5 25 60 55 55 50 35 5 30 5 30 40 10 30 10 30 50 10 5 45 45 15 35 55 45 35 5 15 10 20 5 25 10 40 35 15 40 55 55 10 60 60 35 30 50 15 35 35 35 0 0 5 0 0 0 5 35 45 55 80
