# Supplementary material for: AcconPred: Predicting Solvent Accessibility and Contact Number Simultaneously by a Multitask Learning Framework under the Conditional Neural Fields Model
Source: Biomed Res Int. 2015 Aug 3;2015:678764. doi: 10.1155/2015/678764 (PMC4538422; doi:10.1155/2015/678764)
Supplement: Supplementary file 1 — Training/testing dataset as well as the CASP11 evaluation dataset could be found in the Supplementary Material. The CASP11 evaluation dataset contains all detailed results from SPINE-X, SANN, ACCpro5 and AcconPred. [file 678764.f1.zip › Supplmentary_Files/105_casp11_domain/casp11_domain_AccPro5/T0805-D1.reso]

>T0805-D1
85 45 50 15 40 0 25 45 5 0 40 45 15 30 25 0 25 50 25 30 50 55 60 50 60 10 45 50 50 15 0 40 40 0 0 40 0 0 25 25 0 15 30 25 40 35 35 20 20 0 10 0 0 0 0 25 20 50 50 15 20 50 35 0 20 50 10 0 35 45 25 10 45 45 25 20 40 50 40 20 40 50 35 20 45 20 10 10 45 20 0 35 45 0 0 0 0 0 0 0 0 0 25 40 45 50 50 45 45 40 30 40 40 30 20 10 5 5 5 0 5 0 0 0 0 0 0 0 0 0 0 15 20 25 10 0 0 0 0 0 0 0 0 10 15 15 30 35 35 35 50 30 0 30 45 5 0 55 5 30 55 55 45 15 15 0 0 0 0 0 0 0 0 10 15 50 60 55 55 50 50 50 50 60 30 40 45 15 45 30 5 10 25 20 40 50 55
