# Supplementary material for: AcconPred: Predicting Solvent Accessibility and Contact Number Simultaneously by a Multitask Learning Framework under the Conditional Neural Fields Model
Source: Biomed Res Int. 2015 Aug 3;2015:678764. doi: 10.1155/2015/678764 (PMC4538422; doi:10.1155/2015/678764)
Supplement: Supplementary file 1 — Training/testing dataset as well as the CASP11 evaluation dataset could be found in the Supplementary Material. The CASP11 evaluation dataset contains all detailed results from SPINE-X, SANN, ACCpro5 and AcconPred. [file 678764.f1.zip › Supplmentary_Files/105_casp11_domain/casp11_domain_AccPro5/T0806-D1.reso]

>T0806-D1
30 35 0 0 0 5 15 15 45 50 30 60 45 60 50 55 30 55 30 50 55 20 30 20 35 30 0 20 55 30 0 40 40 0 5 50 25 0 40 55 20 20 40 55 30 0 35 45 5 5 50 5 30 50 50 5 0 45 40 0 15 45 20 0 35 45 5 30 40 50 20 35 55 45 55 20 20 35 0 5 10 0 0 25 0 5 0 0 30 10 0 35 15 45 40 5 40 55 50 10 15 45 20 0 25 35 0 0 5 0 0 0 0 0 0 0 0 0 15 0 20 30 35 0 30 40 10 20 0 40 5 30 15 45 5 50 40 45 55 35 45 30 0 15 45 10 0 30 45 30 0 10 45 20 0 20 50 30 10 50 55 55 55 40 40 5 0 0 5 0 10 5 50 30 0 25 50 5 5 40 40 50 50 30 45 25 35 5 0 25 0 20 0 25 40 35 55 65 55 55 25 40 25 25 5 10 15 0 20 30 0 15 5 25 0 0 15 15 0 0 35 35 35 5 50 40 15 55 40 0 40 55 5 45 45 50 40 5 40 10 25 60 60 25 35 60 65 45 30 5 5 0 20 35 60 80
