# Supplementary material for: AcconPred: Predicting Solvent Accessibility and Contact Number Simultaneously by a Multitask Learning Framework under the Conditional Neural Fields Model
Source: Biomed Res Int. 2015 Aug 3;2015:678764. doi: 10.1155/2015/678764 (PMC4538422; doi:10.1155/2015/678764)
Supplement: Supplementary file 1 — Training/testing dataset as well as the CASP11 evaluation dataset could be found in the Supplementary Material. The CASP11 evaluation dataset contains all detailed results from SPINE-X, SANN, ACCpro5 and AcconPred. [file 678764.f1.zip › Supplmentary_Files/105_casp11_domain/casp11_domain_AccPro5/T0807-D1.reso]

>T0807-D1
55 55 50 30 10 45 5 40 50 45 20 50 0 5 10 0 0 0 0 0 0 30 10 40 55 50 55 25 45 50 50 35 0 20 40 0 0 30 30 0 0 45 10 0 0 20 5 0 5 0 0 35 10 5 45 40 35 40 20 20 50 20 0 5 45 0 0 40 55 30 15 40 25 0 0 0 0 0 20 0 15 25 40 50 30 40 35 55 30 0 25 50 5 0 40 50 0 0 50 50 5 45 15 35 10 0 0 0 0 0 0 0 10 30 30 60 25 45 10 35 35 0 0 45 5 0 40 45 0 20 55 45 20 25 0 25 10 0 0 0 0 20 5 25 20 45 15 0 40 40 0 10 50 25 5 60 30 30 25 0 0 0 5 5 0 10 5 5 0 10 15 25 30 20 25 45 40 0 15 50 10 0 40 55 25 30 0 5 0 0 0 5 0 0 0 5 45 30 45 45 35 45 45 50 15 10 50 30 50 25 0 35 45 0 0 55 55 30 60 40 30 15 0 5 0 0 0 5 0 0 0 20 30 45 25 5 0 0 0 5 50 25 40 40 45 55 20 0 40 50 0 0 50 5 0 35 5 45 5 35 55 55 20 5 50 35 0 45 55 10 30 60 60 65 60 45 50 35 45 20 40 15 55
