# Supplementary material for: AcconPred: Predicting Solvent Accessibility and Contact Number Simultaneously by a Multitask Learning Framework under the Conditional Neural Fields Model
Source: Biomed Res Int. 2015 Aug 3;2015:678764. doi: 10.1155/2015/678764 (PMC4538422; doi:10.1155/2015/678764)
Supplement: Supplementary file 1 — Training/testing dataset as well as the CASP11 evaluation dataset could be found in the Supplementary Material. The CASP11 evaluation dataset contains all detailed results from SPINE-X, SANN, ACCpro5 and AcconPred. [file 678764.f1.zip › Supplmentary_Files/105_casp11_domain/casp11_domain_AccPro5/T0808-D1.reso]

>T0808-D1
75 60 50 60 10 45 0 5 0 5 5 10 0 10 10 20 35 50 65 60 45 35 40 0 15 55 50 25 10 50 30 5 45 50 35 55 35 5 0 20 0 0 0 20 0 25 45 40 35 40 0 30 0 5 0 35 5 55 45 45 10 35 0 25 0 30 5 45 60 50 45 30 45 0 45 0 45 50 55 60 30 50 45 5 20 0 5 40 0 40 5 35 45 35 20 10 5 30 0 20 0 35 15 20 35 50 60 30 55 30 5 5 35 0 30 30 0 20 0 30 30 30 40 40 50 10 40 10 10 55 85
