# Supplementary material for: AcconPred: Predicting Solvent Accessibility and Contact Number Simultaneously by a Multitask Learning Framework under the Conditional Neural Fields Model
Source: Biomed Res Int. 2015 Aug 3;2015:678764. doi: 10.1155/2015/678764 (PMC4538422; doi:10.1155/2015/678764)
Supplement: Supplementary file 1 — Training/testing dataset as well as the CASP11 evaluation dataset could be found in the Supplementary Material. The CASP11 evaluation dataset contains all detailed results from SPINE-X, SANN, ACCpro5 and AcconPred. [file 678764.f1.zip › Supplmentary_Files/105_casp11_domain/casp11_domain_AccPro5/T0808-D2.reso]

>T0808-D2
45 45 30 20 5 5 25 35 5 30 15 5 15 0 25 10 50 10 35 55 60 30 0 40 10 0 5 10 15 0 30 0 30 55 55 40 35 15 25 5 0 0 0 0 0 0 0 0 30 25 0 5 0 0 0 0 15 30 25 60 35 30 20 15 0 0 0 0 0 0 10 25 30 50 40 55 40 35 60 45 10 40 55 45 30 25 0 30 0 10 40 50 30 55 55 5 25 0 30 25 0 15 30 30 10 15 10 5 25 0 10 10 40 5 35 5 35 10 35 30 15 0 15 0 0 0 20 0 25 35 55 55 55 45 25 5 15 0 0 0 0 0 20 15 25 55 45 50 30 5 25 0 0 0 5 0 30 15 20 50 40 20 35 15 0 40 10 0 10 0 0 0 10 20 0 25 45 50 40 10 30 15 30 5 25 0 15 0 30 15 5 5 0 15 30 40 55 50 45 5 25 50 5 25 40 0 30 0 10 5 20 15 30 35 50 40 45 10 15 5 5 10 20 30 15 15 25 50 40 20 20 0 5 0 15 5 5 10 20 10 35 55 50 20 60 30 30 40 35 5 45 25 45 40 55 35 60 40 20 35 10 30 5 55 50 5 55 65 60
