# Supplementary material for: AcconPred: Predicting Solvent Accessibility and Contact Number Simultaneously by a Multitask Learning Framework under the Conditional Neural Fields Model
Source: Biomed Res Int. 2015 Aug 3;2015:678764. doi: 10.1155/2015/678764 (PMC4538422; doi:10.1155/2015/678764)
Supplement: Supplementary file 1 — Training/testing dataset as well as the CASP11 evaluation dataset could be found in the Supplementary Material. The CASP11 evaluation dataset contains all detailed results from SPINE-X, SANN, ACCpro5 and AcconPred. [file 678764.f1.zip › Supplmentary_Files/105_casp11_domain/casp11_domain_AccPro5/T0810-D1.reso]

>T0810-D1
90 65 35 40 55 45 5 50 55 20 15 55 50 40 45 25 5 40 30 0 20 45 10 30 40 35 55 45 30 30 50 35 5 5 30 30 5 25 35 35 5 10 45 50 20 35 50 45 50 45 5 40 55 45 0 0 60 50 5 60 60 15 55 45 40 35 5 30 10 0 25 35 25 10 45 40 60 60 25 30 50 10 10 50 50 0 40 55 35 0 30 55 35 0 45 60 25 10 45 55 35 35 50 40 25 50 20 35 40 45 45 45 90
