# Supplementary material for: AcconPred: Predicting Solvent Accessibility and Contact Number Simultaneously by a Multitask Learning Framework under the Conditional Neural Fields Model
Source: Biomed Res Int. 2015 Aug 3;2015:678764. doi: 10.1155/2015/678764 (PMC4538422; doi:10.1155/2015/678764)
Supplement: Supplementary file 1 — Training/testing dataset as well as the CASP11 evaluation dataset could be found in the Supplementary Material. The CASP11 evaluation dataset contains all detailed results from SPINE-X, SANN, ACCpro5 and AcconPred. [file 678764.f1.zip › Supplmentary_Files/105_casp11_domain/casp11_domain_AccPro5/T0810-D2.reso]

>T0810-D2
90 30 50 55 60 55 50 45 60 20 45 60 50 30 50 50 50 55 25 50 60 45 25 20 10 25 45 35 55 50 60 40 35 15 0 0 0 0 0 15 15 15 25 40 45 60 20 5 45 40 0 0 45 10 0 40 55 30 40 0 40 0 0 0 0 0 0 0 30 25 0 45 55 10 35 50 0 0 40 35 0 15 55 40 5 10 30 0 0 10 10 5 15 35 15 40 30 50 35 0 25 50 25 0 45 45 0 25 50 10 0 35 50 5 15 45 40 40 5 35 5 0 5 0 5 15 5 25 20 20 50 40 0 15 45 15 0 40 55 30 50 10 25 0 0 0 0 5 0 15 5 40 20 5 50 45 55 45 20 50 35 0 0 45 30 0 15 50 40 10 50 55 50 55 20 0 0 0 0 0 0 10 15 30 55 35 0 5 50 5 0 45 45 0 0 50 35 0 35 65 45 35 10 40 5 15 25 0 35 50 20 25 50 50 45 55 20 40 35 50 20 25 60 60 80
