# Supplementary material for: AcconPred: Predicting Solvent Accessibility and Contact Number Simultaneously by a Multitask Learning Framework under the Conditional Neural Fields Model
Source: Biomed Res Int. 2015 Aug 3;2015:678764. doi: 10.1155/2015/678764 (PMC4538422; doi:10.1155/2015/678764)
Supplement: Supplementary file 1 — Training/testing dataset as well as the CASP11 evaluation dataset could be found in the Supplementary Material. The CASP11 evaluation dataset contains all detailed results from SPINE-X, SANN, ACCpro5 and AcconPred. [file 678764.f1.zip › Supplmentary_Files/105_casp11_domain/casp11_domain_AccPro5/T0811-D1.reso]

>T0811-D1
60 10 0 0 0 0 10 5 35 10 30 50 30 25 55 30 0 30 45 0 0 50 35 0 40 55 20 40 50 55 45 50 55 45 5 20 0 0 0 0 0 0 5 0 5 0 20 20 0 20 50 20 5 50 55 40 35 0 20 0 0 0 5 5 0 10 20 35 45 20 25 25 10 5 5 35 5 5 0 40 10 0 35 45 5 35 0 25 0 0 0 0 5 5 25 35 15 15 35 15 5 45 40 20 20 45 20 0 15 20 10 0 25 20 0 10 45 30 35 0 15 0 0 0 0 0 5 30 40 25 50 45 30 50 35 50 35 10 25 40 10 0 20 40 5 0 25 40 5 5 50 45 20 45 40 25 45 40 10 30 25 0 0 0 0 0 5 0 15 10 0 10 30 30 50 30 20 25 25 25 35 45 15 5 40 25 5 10 35 5 0 25 40 5 0 35 50 35 15 40 40 45 0 25 0 0 0 0 5 10 10 40 40 55 20 0 40 40 0 5 50 20 55 45 0 20 0 0 0 0 0 25 5 15 10 40 10 50 35 0 20 45 0 0 45 35 0 35 55 45 60
