# Supplementary material for: AcconPred: Predicting Solvent Accessibility and Contact Number Simultaneously by a Multitask Learning Framework under the Conditional Neural Fields Model
Source: Biomed Res Int. 2015 Aug 3;2015:678764. doi: 10.1155/2015/678764 (PMC4538422; doi:10.1155/2015/678764)
Supplement: Supplementary file 1 — Training/testing dataset as well as the CASP11 evaluation dataset could be found in the Supplementary Material. The CASP11 evaluation dataset contains all detailed results from SPINE-X, SANN, ACCpro5 and AcconPred. [file 678764.f1.zip › Supplmentary_Files/105_casp11_domain/casp11_domain_AccPro5/T0812-D1.reso]

>T0812-D1
55 20 30 15 30 0 30 10 40 40 50 50 35 30 5 35 0 5 35 35 20 30 30 40 35 20 20 45 20 5 20 10 40 25 35 45 20 5 5 20 5 35 10 10 30 40 35 10 40 35 25 5 0 0 0 20 0 5 50 35 5 25 25 35 30 0 15 0 10 10 15 25 0 30 0 20 0 25 5 25 30 35 55 55 35 20 35 20 35 30 20 0 5 0 5 0 15 5 35 40 30 25 25 10 15 0 5 5 20 30 20 55 30 35 35 45 50 35 35 20 35 10 25 0 35 0 20 25 40 25 0 35 25 15 45 50 45 45 35 30 40 30 40 5 25 15 40 20 0 0 20 0 0 15 25 0 25 10 0 5 0 20 0 15 15 15 40 40 15 30 40 10 25 0 30 40 0 25 5 40 35 90
