# Supplementary material for: AcconPred: Predicting Solvent Accessibility and Contact Number Simultaneously by a Multitask Learning Framework under the Conditional Neural Fields Model
Source: Biomed Res Int. 2015 Aug 3;2015:678764. doi: 10.1155/2015/678764 (PMC4538422; doi:10.1155/2015/678764)
Supplement: Supplementary file 1 — Training/testing dataset as well as the CASP11 evaluation dataset could be found in the Supplementary Material. The CASP11 evaluation dataset contains all detailed results from SPINE-X, SANN, ACCpro5 and AcconPred. [file 678764.f1.zip › Supplmentary_Files/105_casp11_domain/casp11_domain_AccPro5/T0813-D1.reso]

>T0813-D1
70 60 55 40 5 35 25 0 0 0 0 0 0 0 15 5 0 15 5 0 0 30 5 0 35 55 40 40 20 40 15 20 0 5 0 10 15 30 35 45 50 10 5 45 30 0 30 50 20 35 5 5 20 35 10 5 45 35 5 35 50 5 5 45 35 0 5 0 0 0 0 0 0 5 5 30 10 0 15 45 0 0 40 40 0 15 55 25 5 45 50 30 0 0 0 0 0 0 0 5 5 35 30 35 0 5 40 15 0 25 40 20 5 50 55 40 5 20 0 0 0 0 0 0 0 0 0 25 40 40 30 20 10 35 10 5 25 30 35 10 5 35 35 15 20 5 0 0 0 25 25 50 55 35 40 45 25 0 0 20 15 0 20 35 0 0 40 35 15 40 0 30 0 5 25 5 25 5 45 35 5 10 30 0 0 0 0 0 0 0 0 0 0 0 0 0 0 0 0 0 5 0 0 20 40 20 45 50 50 45 35 50 35 0 15 35 5 5 5 25 10 0 25 10 0 0 15 0 0 35 20 20 15 40 0 0 15 20 0 0 25 35 10 30 55 25 0 15 45 5 0 45 40 0 15 50 20 0 45 40 0 20 50 10 0 45 60 55 40 40 55 35 0 25 50 10 0 45 40 0 40 50 10 15 50 45 0 35 60 50 55 60 60 35 30 25 50 25 15 25 45 75
