# Supplementary material for: AcconPred: Predicting Solvent Accessibility and Contact Number Simultaneously by a Multitask Learning Framework under the Conditional Neural Fields Model
Source: Biomed Res Int. 2015 Aug 3;2015:678764. doi: 10.1155/2015/678764 (PMC4538422; doi:10.1155/2015/678764)
Supplement: Supplementary file 1 — Training/testing dataset as well as the CASP11 evaluation dataset could be found in the Supplementary Material. The CASP11 evaluation dataset contains all detailed results from SPINE-X, SANN, ACCpro5 and AcconPred. [file 678764.f1.zip › Supplmentary_Files/105_casp11_domain/casp11_domain_AccPro5/T0814-D1.reso]

>T0814-D1
80 45 45 15 30 35 35 5 10 30 55 35 0 35 10 0 20 0 20 35 55 60 55 50 25 25 10 0 0 0 35 5 45 50 60 45 40 0 25 0 25 0 25 30 5 35 50 50 30 40 25 0 20 0 15 0 20 5 0 30 25 45 5 40 45 30 45 5 20 45 15 25 5 0 45 40 10 40 50 25 30 0 35 40 10 40 30 5 25 30 10 35 15 35 5 10 10 0 25 0 35 0 20 35 50 45 10 40 10 40 20 20 10 25 5 10 0 20 0 10 40 55 55 45 60 55 30 15 10 0 20 20 20 0 20 15 45
