# Supplementary material for: AcconPred: Predicting Solvent Accessibility and Contact Number Simultaneously by a Multitask Learning Framework under the Conditional Neural Fields Model
Source: Biomed Res Int. 2015 Aug 3;2015:678764. doi: 10.1155/2015/678764 (PMC4538422; doi:10.1155/2015/678764)
Supplement: Supplementary file 1 — Training/testing dataset as well as the CASP11 evaluation dataset could be found in the Supplementary Material. The CASP11 evaluation dataset contains all detailed results from SPINE-X, SANN, ACCpro5 and AcconPred. [file 678764.f1.zip › Supplmentary_Files/105_casp11_domain/casp11_domain_AccPro5/T0814-D2.reso]

>T0814-D2
75 65 50 5 30 0 25 0 45 5 35 40 40 25 40 20 45 30 30 45 50 20 30 40 0 35 0 30 0 40 20 55 55 5 40 0 35 20 10 30 50 25 0 20 0 0 0 0 0 10 35 30 20 30 35 5 20 30 20 10 30 5 10 15 5 30 40 45 40 0 20 5 40 20 5 25 40 5 10 0 55 5 20 35 25 5 15 30 0 15 5 15 15 0 20 0 20 15 35 40 10 10 15 15 5 10 10 20 0 15 0 40 25 15 45 95
