# Supplementary material for: AcconPred: Predicting Solvent Accessibility and Contact Number Simultaneously by a Multitask Learning Framework under the Conditional Neural Fields Model
Source: Biomed Res Int. 2015 Aug 3;2015:678764. doi: 10.1155/2015/678764 (PMC4538422; doi:10.1155/2015/678764)
Supplement: Supplementary file 1 — Training/testing dataset as well as the CASP11 evaluation dataset could be found in the Supplementary Material. The CASP11 evaluation dataset contains all detailed results from SPINE-X, SANN, ACCpro5 and AcconPred. [file 678764.f1.zip › Supplmentary_Files/105_casp11_domain/casp11_domain_AccPro5/T0814-D3.reso]

>T0814-D3
80 40 10 25 35 0 25 10 30 30 10 35 15 35 25 25 25 0 35 35 0 35 25 45 45 50 20 5 10 0 10 0 10 15 35 35 45 20 50 45 35 30 5 10 20 15 40 20 15 30 0 20 0 0 0 10 5 20 50 40 50 40 30 45 15 25 0 15 0 0 10 0 5 0 10 0 40 15 50 60 15 55 60 20 35 0 0 0 5 0 25 0 5 20 15 25 10 25 50 45 15 25 0 35 10 30 55 55 35 45 20 5 25 0 15 0 0 0 25 10 5 10 10 15 0 10 0 0 5 20 55 65 70 55 60 40 35 45 35 20 40 15 50 85
