# Supplementary material for: AcconPred: Predicting Solvent Accessibility and Contact Number Simultaneously by a Multitask Learning Framework under the Conditional Neural Fields Model
Source: Biomed Res Int. 2015 Aug 3;2015:678764. doi: 10.1155/2015/678764 (PMC4538422; doi:10.1155/2015/678764)
Supplement: Supplementary file 1 — Training/testing dataset as well as the CASP11 evaluation dataset could be found in the Supplementary Material. The CASP11 evaluation dataset contains all detailed results from SPINE-X, SANN, ACCpro5 and AcconPred. [file 678764.f1.zip › Supplmentary_Files/105_casp11_domain/casp11_domain_AccPro5/T0815-D1.reso]

>T0815-D1
65 65 15 35 55 10 0 30 30 0 0 40 10 30 45 50 40 25 10 40 15 0 0 30 0 0 10 45 25 0 10 0 25 20 40 45 35 45 20 40 5 20 50 20 0 35 45 0 10 45 45 5 35 40 50 10 40 10 35 0 30 10 15 45 5 35 55 60 55 45 40 5 10 0 20 0 35 0 45 20 55 10 55 45 15 20 5 30 0 30 5 15 0 30 5 45 50 50 30 0 40 40 0 40 30 75
