# Supplementary material for: AcconPred: Predicting Solvent Accessibility and Contact Number Simultaneously by a Multitask Learning Framework under the Conditional Neural Fields Model
Source: Biomed Res Int. 2015 Aug 3;2015:678764. doi: 10.1155/2015/678764 (PMC4538422; doi:10.1155/2015/678764)
Supplement: Supplementary file 1 — Training/testing dataset as well as the CASP11 evaluation dataset could be found in the Supplementary Material. The CASP11 evaluation dataset contains all detailed results from SPINE-X, SANN, ACCpro5 and AcconPred. [file 678764.f1.zip › Supplmentary_Files/105_casp11_domain/casp11_domain_AccPro5/T0816-D1.reso]

>T0816-D1
80 35 35 5 45 55 5 10 55 50 0 40 65 50 10 25 45 10 0 35 5 0 0 30 45 5 5 50 45 15 35 20 40 35 20 45 45 45 40 10 50 40 0 10 40 10 5 45 10 25 60 45 0 40 50 10 10 50 20 0 50 55 30 15 55 70 70 95
