# Supplementary material for: AcconPred: Predicting Solvent Accessibility and Contact Number Simultaneously by a Multitask Learning Framework under the Conditional Neural Fields Model
Source: Biomed Res Int. 2015 Aug 3;2015:678764. doi: 10.1155/2015/678764 (PMC4538422; doi:10.1155/2015/678764)
Supplement: Supplementary file 1 — Training/testing dataset as well as the CASP11 evaluation dataset could be found in the Supplementary Material. The CASP11 evaluation dataset contains all detailed results from SPINE-X, SANN, ACCpro5 and AcconPred. [file 678764.f1.zip › Supplmentary_Files/105_casp11_domain/casp11_domain_AccPro5/T0817-D1.reso]

>T0817-D1
80 35 0 20 0 0 10 25 30 45 20 50 35 5 20 15 25 35 30 30 30 10 15 15 0 0 15 10 0 0 25 15 0 5 40 20 35 60 60 20 45 5 20 15 25 0 0 50 40 5 45 25 25 60 50 40 35 35 0 25 0 30 0 25 55 50 0 40 0 15 45 30 40 55 5 35 0 50 15 0 25 10 0 0 35 20 0 20 50 50 60 50 35 30 15 20 30 10 5 40 25 0 40 40 0 35 20 25 25 60 20 25 0 25 0 25 0 45 35 10 15 5 5 0 0 10 10 0 0 10 10 10 5 5 5 0 5 5 35 50 20 5 50 60 45 55 40 20 45 30 5 5 5 5 0 5 0 20 0 30 50 15 50 60 40 30 5 10 0 30 40 10 50 50 10 10 55 55 40 15 35 0 35 35 0 15 0 20 5 0 30 30 30 10 0 10 5 5 5 0 30 35 20 25 0 10 0 0 20 25 20 40 25 25 45 5 25 20 50 20 0 45 35 0 45 65 45 60 40 15 25 0 20 45 30 40 25 10 15 0 5 0 0 5 0 15 15 45 50 50 35 10 50 50 25 55 25 0 20 40 0 0 30 35 75
