# Supplementary material for: AcconPred: Predicting Solvent Accessibility and Contact Number Simultaneously by a Multitask Learning Framework under the Conditional Neural Fields Model
Source: Biomed Res Int. 2015 Aug 3;2015:678764. doi: 10.1155/2015/678764 (PMC4538422; doi:10.1155/2015/678764)
Supplement: Supplementary file 1 — Training/testing dataset as well as the CASP11 evaluation dataset could be found in the Supplementary Material. The CASP11 evaluation dataset contains all detailed results from SPINE-X, SANN, ACCpro5 and AcconPred. [file 678764.f1.zip › Supplmentary_Files/105_casp11_domain/casp11_domain_AccPro5/T0817-D2.reso]

>T0817-D2
85 50 25 5 15 0 0 0 0 15 15 55 55 50 50 35 10 50 35 35 35 0 15 40 0 0 10 20 0 0 20 20 40 30 0 0 40 20 0 5 40 35 30 25 35 30 0 35 5 10 0 5 40 20 5 25 15 15 35 50 55 15 50 50 15 55 15 20 15 50 30 0 35 45 0 0 50 50 10 40 10 55 50 50 40 15 25 40 55 55 40 40 50 5 30 0 20 0 10 0 15 20 40 50 25 45 40 15 40 35 0 0 40 15 0 15 45 15 0 40 45 0 5 0 35 0 25 0 30 15 15 40 30 40 40 5 15 0 0 0 0 5 0 5 5 5 20 15 10 0 10 5 5 0 5 5 5 15 25 35 40 35 20 30 10 15 15 35 35 50 35 5 30 40 0 5 45 40 0 25 50 35 35 55 55 45 10 35 50 10 0 45 40 0 15 50 20 0 25 55 40 5 25 20 0 0 0 20 30 45
