# Supplementary material for: AcconPred: Predicting Solvent Accessibility and Contact Number Simultaneously by a Multitask Learning Framework under the Conditional Neural Fields Model
Source: Biomed Res Int. 2015 Aug 3;2015:678764. doi: 10.1155/2015/678764 (PMC4538422; doi:10.1155/2015/678764)
Supplement: Supplementary file 1 — Training/testing dataset as well as the CASP11 evaluation dataset could be found in the Supplementary Material. The CASP11 evaluation dataset contains all detailed results from SPINE-X, SANN, ACCpro5 and AcconPred. [file 678764.f1.zip › Supplmentary_Files/105_casp11_domain/casp11_domain_AccPro5/T0818-D1.reso]

>T0818-D1
95 65 55 40 20 55 55 35 0 20 40 10 0 30 0 5 10 35 50 45 20 55 50 0 10 45 10 10 30 55 40 15 55 55 40 15 55 45 35 20 15 50 35 0 35 45 0 5 45 15 0 30 25 10 5 25 20 15 35 15 50 35 55 45 45 35 50 45 20 55 50 35 10 0 0 0 5 5 15 5 20 30 50 10 40 10 30 35 50 40 35 40 45 10 25 0 20 0 5 5 15 10 0 10 20 40 20 30 50 20 40 20 10 30 5 0 30 5 0 45 45 35 50 25 30 35 35 5 15 15 20 40 60 70
