# Supplementary material for: AcconPred: Predicting Solvent Accessibility and Contact Number Simultaneously by a Multitask Learning Framework under the Conditional Neural Fields Model
Source: Biomed Res Int. 2015 Aug 3;2015:678764. doi: 10.1155/2015/678764 (PMC4538422; doi:10.1155/2015/678764)
Supplement: Supplementary file 1 — Training/testing dataset as well as the CASP11 evaluation dataset could be found in the Supplementary Material. The CASP11 evaluation dataset contains all detailed results from SPINE-X, SANN, ACCpro5 and AcconPred. [file 678764.f1.zip › Supplmentary_Files/105_casp11_domain/casp11_domain_AccPro5/T0819-D1.reso]

>T0819-D1
50 55 30 15 50 40 0 25 55 25 5 50 45 10 50 55 30 40 20 50 40 5 35 50 50 25 55 30 55 35 10 0 30 0 20 10 20 20 10 10 15 25 15 15 50 35 0 15 45 10 0 30 50 5 0 45 40 0 20 25 5 15 35 35 35 5 40 40 0 15 45 20 0 5 50 25 20 60 5 45 45 35 10 0 0 0 0 5 5 0 15 15 0 0 15 0 0 0 5 0 0 5 40 55 55 35 30 0 0 0 0 10 0 0 0 20 15 0 25 20 0 0 35 5 10 45 5 35 10 20 30 5 35 20 25 50 30 20 20 25 0 35 30 0 5 40 25 0 40 50 55 40 5 25 0 0 0 0 0 0 5 25 15 10 30 10 35 30 10 35 40 50 25 0 30 40 0 0 50 45 5 50 55 25 0 0 0 0 0 0 5 0 0 5 30 5 5 55 50 55 30 20 45 15 5 45 20 0 40 55 15 40 5 0 0 0 0 5 0 0 0 20 0 5 0 0 0 0 0 5 0 0 0 0 0 0 10 40 40 0 0 45 25 0 35 50 10 30 25 25 10 20 0 10 10 0 0 10 10 0 0 15 15 0 0 45 25 30 50 15 0 40 45 0 10 50 30 0 25 50 15 10 50 30 0 20 50 20 0 45 55 20 45 5 45 15 10 45 15 30 0 0 0 0 0 0 20 5 45 55 55 35 50 35 0 30 45 10 0 25 45 10 0 40 50 25 15 0 0 0 10 25 10 50 50 35 55 10 50 30 5 0 5 0 0 0 40 35 50 55 35 0 40 35 0 5 50 10 0 40 50 0 0 50 55 20 90
