# Supplementary material for: AcconPred: Predicting Solvent Accessibility and Contact Number Simultaneously by a Multitask Learning Framework under the Conditional Neural Fields Model
Source: Biomed Res Int. 2015 Aug 3;2015:678764. doi: 10.1155/2015/678764 (PMC4538422; doi:10.1155/2015/678764)
Supplement: Supplementary file 1 — Training/testing dataset as well as the CASP11 evaluation dataset could be found in the Supplementary Material. The CASP11 evaluation dataset contains all detailed results from SPINE-X, SANN, ACCpro5 and AcconPred. [file 678764.f1.zip › Supplmentary_Files/105_casp11_domain/casp11_domain_AccPro5/T0820-D1.reso]

>T0820-D1
95 55 25 20 0 5 0 10 35 40 35 15 30 35 10 30 20 0 30 25 15 0 25 25 0 10 25 10 0 30 35 5 15 30 25 45 25 25 15 50 35 0 30 45 5 0 15 45 5 5 10 40 30 15 35 10 35 20 35 25 40 40 30 20 35 25 10 5 25 25 15 0 5 10 20 0 35 35 5 0 45 30 5 20 40 15 40 50 65 95
