# Supplementary material for: AcconPred: Predicting Solvent Accessibility and Contact Number Simultaneously by a Multitask Learning Framework under the Conditional Neural Fields Model
Source: Biomed Res Int. 2015 Aug 3;2015:678764. doi: 10.1155/2015/678764 (PMC4538422; doi:10.1155/2015/678764)
Supplement: Supplementary file 1 — Training/testing dataset as well as the CASP11 evaluation dataset could be found in the Supplementary Material. The CASP11 evaluation dataset contains all detailed results from SPINE-X, SANN, ACCpro5 and AcconPred. [file 678764.f1.zip › Supplmentary_Files/105_casp11_domain/casp11_domain_AccPro5/T0821-D1.reso]

>T0821-D1
70 40 5 40 40 0 5 45 30 0 15 25 20 15 45 40 55 40 5 45 45 0 10 50 25 0 40 40 0 5 45 15 25 50 60 35 40 50 15 0 25 0 0 10 10 10 0 10 0 10 20 35 20 55 40 5 40 45 0 0 45 25 0 40 40 0 0 40 10 25 20 55 15 5 35 0 0 10 5 5 0 10 0 10 20 35 15 55 40 10 40 45 0 0 50 25 0 35 40 0 0 40 5 25 30 55 15 5 30 0 0 10 5 5 0 10 0 10 20 30 15 55 40 5 40 45 0 0 45 20 0 40 40 0 0 40 5 25 25 55 15 0 30 0 5 5 5 5 0 5 0 10 20 35 20 55 40 5 40 45 0 0 50 20 0 35 40 0 0 40 10 25 30 55 15 0 30 0 0 10 5 5 0 10 0 10 20 30 15 55 40 5 40 45 0 0 50 25 0 40 40 0 0 40 5 30 30 55 15 0 35 0 0 10 5 10 0 15 0 15 25 35 15 55 45 15 45 45 0 10 50 25 0 45 40 0 10 50 10 40 35 65 35 50 35 0 20 35 15 0 45 20 5 30 85
