# Supplementary material for: AcconPred: Predicting Solvent Accessibility and Contact Number Simultaneously by a Multitask Learning Framework under the Conditional Neural Fields Model
Source: Biomed Res Int. 2015 Aug 3;2015:678764. doi: 10.1155/2015/678764 (PMC4538422; doi:10.1155/2015/678764)
Supplement: Supplementary file 1 — Training/testing dataset as well as the CASP11 evaluation dataset could be found in the Supplementary Material. The CASP11 evaluation dataset contains all detailed results from SPINE-X, SANN, ACCpro5 and AcconPred. [file 678764.f1.zip › Supplmentary_Files/105_casp11_domain/casp11_domain_AccPro5/T0822-D1.reso]

>T0822-D1
85 65 35 55 45 35 25 10 5 40 5 45 60 65 60 60 45 35 35 5 5 35 0 45 10 30 20 40 55 50 55 55 35 10 35 10 45 20 25 35 5 25 35 0 0 35 10 30 30 45 20 35 0 45 0 40 10 50 55 55 0 35 0 5 0 0 0 10 50 50 45 50 45 0 35 5 40 45 45 50 10 35 40 30 35 20 0 0 25 0 35 0 55 40 40 50 25 45 5 30 50 60 35 30 10 10 0 0 5 0 25 15 35 85
