# Supplementary material for: AcconPred: Predicting Solvent Accessibility and Contact Number Simultaneously by a Multitask Learning Framework under the Conditional Neural Fields Model
Source: Biomed Res Int. 2015 Aug 3;2015:678764. doi: 10.1155/2015/678764 (PMC4538422; doi:10.1155/2015/678764)
Supplement: Supplementary file 1 — Training/testing dataset as well as the CASP11 evaluation dataset could be found in the Supplementary Material. The CASP11 evaluation dataset contains all detailed results from SPINE-X, SANN, ACCpro5 and AcconPred. [file 678764.f1.zip › Supplmentary_Files/105_casp11_domain/casp11_domain_AccPro5/T0823-D1.reso]

>T0823-D1
65 50 25 20 60 15 30 50 25 45 15 40 0 0 0 0 0 0 20 0 35 30 30 50 30 15 50 30 50 25 0 20 35 0 0 20 20 0 0 35 25 10 0 10 0 0 15 0 25 30 25 25 45 35 10 20 45 15 0 0 40 0 0 45 40 15 45 20 20 5 0 0 0 0 10 30 20 50 40 55 30 50 50 10 35 30 50 25 0 25 25 0 5 30 35 0 0 50 35 5 35 20 30 10 0 0 0 0 0 0 5 15 15 40 35 45 45 5 35 50 40 0 5 45 15 0 45 45 0 35 55 35 15 25 0 10 0 0 0 0 0 15 25 45 45 15 0 40 30 0 10 45 35 20 15 0 15 0 0 5 0 0 5 5 0 10 15 35 20 20 15 35 35 10 0 40 20 0 15 45 35 25 0 0 0 0 0 15 20 10 5 5 40 5 15 25 40 15 45 10 5 15 30 25 25 35 30 5 20 15 10 10 15 5 45 20 0 40 35 40 40 35 15 20 0 10 10 0 0 0 0 0 0 0 5 20 10 40 5 0 0 0 10 0 35 5 45 40 20 55 25 0 40 40 0 15 45 5 15 60 50 50 20 35 50 45 20 25 25 10 5 40 15 0 40 35 10 30 45 45 30 40 45 30 50 60 60 90
