# Supplementary material for: AcconPred: Predicting Solvent Accessibility and Contact Number Simultaneously by a Multitask Learning Framework under the Conditional Neural Fields Model
Source: Biomed Res Int. 2015 Aug 3;2015:678764. doi: 10.1155/2015/678764 (PMC4538422; doi:10.1155/2015/678764)
Supplement: Supplementary file 1 — Training/testing dataset as well as the CASP11 evaluation dataset could be found in the Supplementary Material. The CASP11 evaluation dataset contains all detailed results from SPINE-X, SANN, ACCpro5 and AcconPred. [file 678764.f1.zip › Supplmentary_Files/105_casp11_domain/casp11_domain_AccPro5/T0824-D1.reso]

>T0824-D1
90 65 25 45 10 20 0 35 0 40 50 60 45 15 45 45 0 5 55 15 0 40 45 0 20 60 55 45 45 35 40 20 0 25 0 25 30 60 45 5 60 55 25 10 50 45 10 5 55 55 15 55 35 40 60 35 25 30 25 35 30 5 0 10 0 0 0 40 35 35 30 60 45 10 30 0 35 25 0 35 15 40 30 35 30 30 10 10 20 15 0 15 15 25 0 40 60 10 55 65 40 30 40 0 30 0 35 50
