# Supplementary material for: AcconPred: Predicting Solvent Accessibility and Contact Number Simultaneously by a Multitask Learning Framework under the Conditional Neural Fields Model
Source: Biomed Res Int. 2015 Aug 3;2015:678764. doi: 10.1155/2015/678764 (PMC4538422; doi:10.1155/2015/678764)
Supplement: Supplementary file 1 — Training/testing dataset as well as the CASP11 evaluation dataset could be found in the Supplementary Material. The CASP11 evaluation dataset contains all detailed results from SPINE-X, SANN, ACCpro5 and AcconPred. [file 678764.f1.zip › Supplmentary_Files/105_casp11_domain/casp11_domain_AccPro5/T0827-D1.reso]

>T0827-D1
80 60 60 50 10 40 45 0 0 40 30 0 0 35 0 0 10 25 40 40 55 55 20 35 55 50 5 15 45 10 0 30 40 0 0 20 25 0 0 50 35 5 40 45 40 0 10 40 35 0 0 50 30 0 40 60 15 55 55 10 10 40 40 0 0 30 30 0 0 50 30 30 15 45 5 0 15 15 0 0 40 30 5 50 30 5 35 40 45 20 0 0 40 0 0 40 40 50 45 50 45 15 5 15 0 0 5 40 15 50 50 5 30 50 35 0 0 35 0 0 0 45 30 25 35 40 45 0 0 20 25 0 0 55 25 50 45 10 40 0 10 45 45 0 0 35 25 0 0 45 25 0 50 60 20 55 45 0 15 45 25 0 5 35 15 50 55 5 30 45 50 5 0 30 30 0 0 30 20 0 10 50 30 0 20 50 30 0 20 50 40 35 95
