# Supplementary material for: AcconPred: Predicting Solvent Accessibility and Contact Number Simultaneously by a Multitask Learning Framework under the Conditional Neural Fields Model
Source: Biomed Res Int. 2015 Aug 3;2015:678764. doi: 10.1155/2015/678764 (PMC4538422; doi:10.1155/2015/678764)
Supplement: Supplementary file 1 — Training/testing dataset as well as the CASP11 evaluation dataset could be found in the Supplementary Material. The CASP11 evaluation dataset contains all detailed results from SPINE-X, SANN, ACCpro5 and AcconPred. [file 678764.f1.zip › Supplmentary_Files/105_casp11_domain/casp11_domain_AccPro5/T0827-D2.reso]

>T0827-D2
65 60 35 45 5 0 25 35 0 0 50 50 0 0 30 30 0 10 65 55 65 30 50 20 25 5 0 30 30 0 0 30 5 0 30 30 25 30 35 45 30 60 45 10 60 55 15 25 10 45 15 0 25 45 0 0 25 15 0 35 30 25 10 25 45 35 0 5 45 5 0 0 10 0 0 35 0 35 35 25 5 0 10 25 0 5 35 25 55 25 30 25 0 0 0 0 0 0 30 5 30 40 10 50 25 55 15 0 35 25 0 0 50 45 0 45 40 30 30 50 45 0 45 30 0 10 35 0 5 25 10 5 5 25 35 35 0 30 25 5 5 30 10 10 35 15 35 30 50 90
