# Supplementary material for: AcconPred: Predicting Solvent Accessibility and Contact Number Simultaneously by a Multitask Learning Framework under the Conditional Neural Fields Model
Source: Biomed Res Int. 2015 Aug 3;2015:678764. doi: 10.1155/2015/678764 (PMC4538422; doi:10.1155/2015/678764)
Supplement: Supplementary file 1 — Training/testing dataset as well as the CASP11 evaluation dataset could be found in the Supplementary Material. The CASP11 evaluation dataset contains all detailed results from SPINE-X, SANN, ACCpro5 and AcconPred. [file 678764.f1.zip › Supplmentary_Files/105_casp11_domain/casp11_domain_AccPro5/T0829-D1.reso]

>T0829-D1
95 60 45 45 25 55 30 25 35 0 20 15 5 25 15 35 60 60 40 45 20 0 25 0 20 5 35 55 45 30 10 5 20 10 15 50 10 20 50 45 10 10 40 40 0 10 40 10 40 45 50 15 40 10 5 30 45 35 0 35 50 40 15 30 15 50 80
