# Supplementary material for: AcconPred: Predicting Solvent Accessibility and Contact Number Simultaneously by a Multitask Learning Framework under the Conditional Neural Fields Model
Source: Biomed Res Int. 2015 Aug 3;2015:678764. doi: 10.1155/2015/678764 (PMC4538422; doi:10.1155/2015/678764)
Supplement: Supplementary file 1 — Training/testing dataset as well as the CASP11 evaluation dataset could be found in the Supplementary Material. The CASP11 evaluation dataset contains all detailed results from SPINE-X, SANN, ACCpro5 and AcconPred. [file 678764.f1.zip › Supplmentary_Files/105_casp11_domain/casp11_domain_AccPro5/T0830-D1.reso]

>T0830-D1
80 50 35 10 5 0 0 5 5 5 5 5 5 5 5 15 5 10 15 10 20 20 20 25 15 20 35 35 40 20 5 15 5 0 15 0 0 25 30 0 10 50 40 30 35 10 0 5 0 20 15 35 45 25 35 20 10 45 25 5 0 0 0 5 0 0 0 0 0 0 10 15 5 10 15 20 20 30 5 0 0 15 0 5 5 5 0 5 5 5 5 10 0 5 5 0 10 15 5 0 20 25 20 25 45 45 30 10 0 5 0 0 0 0 0 5 0 0 5 10 10 0 0 5 10 15 20 20 5 20 10 10 0 5 5 5 5 5 10 10 10 5 10 10 5 10 10 20 10 20 25 30 30 35 45 40 40 40 35 20 15 5 5 0 0 0 5 5 5 10 5 10 10 10 15 15 30 20 15 10 5 5 5 5 10 5 10 5 5 5 5 10 10 10 15 25 35 40 20 40 30 15 30 30 20 20 10 5 5 0 0 0 0 0 0 0 5 5 0 5 10 10 15 10 20 20 25 35 30 40 40 5 5 20 15 5 5 15 30 40 25 25 30 25 5 5 5 5 0 5 10 5 5 10 10 5 10 5 5 5 5 5 0 10 15 5 10 20 25 20 30 40 45 45 40 40 30 20 15 5 5 5 5 10 10 10 10 10 10 5 5 10 10 10 20 35 30 45 30 20 25 10 0 0 5 5 10 5 5 0 0 0 0 0 0 15 10 0 20 30 20 30 50 45 40 25 30 25 15 10 5 5 5 5 5 5 10 10 10 10 15 15 10 10 15 10 10 10 20 20 25 30 20 30 35 35 25 25 30 30 20 20 10 10 5 10 10 5 10 10 10 15 15 15 15 15 15 15 10 20 20 20 25 30 35 40 25 20 20 5 0 0 5 10 10 10 10 15 15 10 10 10 10 5 10 10 20 20 20 35 30 25 30 40 45 55 95
