# Supplementary material for: AcconPred: Predicting Solvent Accessibility and Contact Number Simultaneously by a Multitask Learning Framework under the Conditional Neural Fields Model
Source: Biomed Res Int. 2015 Aug 3;2015:678764. doi: 10.1155/2015/678764 (PMC4538422; doi:10.1155/2015/678764)
Supplement: Supplementary file 1 — Training/testing dataset as well as the CASP11 evaluation dataset could be found in the Supplementary Material. The CASP11 evaluation dataset contains all detailed results from SPINE-X, SANN, ACCpro5 and AcconPred. [file 678764.f1.zip › Supplmentary_Files/105_casp11_domain/casp11_domain_AccPro5/T0830-D2.reso]

>T0830-D2
90 55 55 5 0 55 35 0 30 55 45 5 50 60 60 15 50 5 5 5 0 35 20 5 25 25 10 0 10 10 5 0 40 15 5 0 5 0 0 30 20 30 45 35 5 40 10 15 10 45 30 30 15 40 45 10 5 30 30 0 40 40 0 20 55 25 5 50 60 35 45 50 0 0 0 0 0 20 40 45 15 5 45 30 15 30 55 45 5 25 0 25 10 0 5 40 35 10 30 25 0 0 0 30 35 35 20 35 25 60 95
