# Supplementary material for: AcconPred: Predicting Solvent Accessibility and Contact Number Simultaneously by a Multitask Learning Framework under the Conditional Neural Fields Model
Source: Biomed Res Int. 2015 Aug 3;2015:678764. doi: 10.1155/2015/678764 (PMC4538422; doi:10.1155/2015/678764)
Supplement: Supplementary file 1 — Training/testing dataset as well as the CASP11 evaluation dataset could be found in the Supplementary Material. The CASP11 evaluation dataset contains all detailed results from SPINE-X, SANN, ACCpro5 and AcconPred. [file 678764.f1.zip › Supplmentary_Files/105_casp11_domain/casp11_domain_AccPro5/T0831-D1.reso]

>T0831-D1
70 25 50 50 0 0 50 35 0 15 55 50 0 40 30 35 0 40 55 10 0 25 35 0 0 0 10 5 10 5 0 0 0 0 10 0 0 30 50 35 10 40 45 0 0 45 15 0 25 40 0 0 40 10 0 50 50 25 40 55 45 5 35 10 25 20 0 20 15 0 5 0 0 10 5 0 10 40 0 0 50 55 50 45 55 60 5 35 40 20 5 40 35 45 45 5 40 55 30 0 50 45 10 30 45 50 15 15 40 55 35 20 40 45 10 25 35 30 15 25 5 25 40 10 35 45 35 30 10 45 25 5 40 50 35 25 40 20 25 50 45 10 30 55 50 25 40 45 20 5 25 0 45 55 60
