# Supplementary material for: AcconPred: Predicting Solvent Accessibility and Contact Number Simultaneously by a Multitask Learning Framework under the Conditional Neural Fields Model
Source: Biomed Res Int. 2015 Aug 3;2015:678764. doi: 10.1155/2015/678764 (PMC4538422; doi:10.1155/2015/678764)
Supplement: Supplementary file 1 — Training/testing dataset as well as the CASP11 evaluation dataset could be found in the Supplementary Material. The CASP11 evaluation dataset contains all detailed results from SPINE-X, SANN, ACCpro5 and AcconPred. [file 678764.f1.zip › Supplmentary_Files/105_casp11_domain/casp11_domain_AccPro5/T0831-D2.reso]

>T0831-D2
95 60 25 40 45 40 5 45 50 0 35 50 25 0 35 45 5 35 50 35 0 50 45 0 40 55 45 5 50 55 45 30 50 5 0 10 30 0 0 25 20 0 20 40 30 40 35 45 50 40 0 15 50 35 0 35 55 35 5 45 50 5 35 40 5 40 25 0 25 15 0 0 10 20 15 0 45 40 0 40 55 0 15 50 40 0 20 50 25 0 45 50 5 50 65 50 50 20 55 50 10 0 45 45 0 0 35 5 15 10 30 45 45 55 40 60 50 55 40 5 35 5 0 35 0 30 45 10 0 45 45 0 20 10 30 0 5 30 10 25 50 40 15 35 40 0 0 35 20 0 5 30 5 0 35 30 40 35 25 40 50 45 15 10 50 50 0 40 30 5 5 40 0 0 45 35 0 35 55 15 0 45 35 0 25 35 0 0 25 25 0 35 45 30 15 55 95
