# Supplementary material for: AcconPred: Predicting Solvent Accessibility and Contact Number Simultaneously by a Multitask Learning Framework under the Conditional Neural Fields Model
Source: Biomed Res Int. 2015 Aug 3;2015:678764. doi: 10.1155/2015/678764 (PMC4538422; doi:10.1155/2015/678764)
Supplement: Supplementary file 1 — Training/testing dataset as well as the CASP11 evaluation dataset could be found in the Supplementary Material. The CASP11 evaluation dataset contains all detailed results from SPINE-X, SANN, ACCpro5 and AcconPred. [file 678764.f1.zip › Supplmentary_Files/105_casp11_domain/casp11_domain_AccPro5/T0832-D1.reso]

>T0832-D1
90 45 55 55 35 10 50 45 45 10 20 55 40 40 40 10 10 50 25 0 20 45 0 35 35 10 0 30 20 10 50 25 0 40 60 15 0 45 55 0 30 60 25 0 15 35 35 0 40 60 55 50 15 50 25 30 35 50 45 5 50 55 20 0 25 40 5 0 30 45 20 0 20 55 15 30 10 35 55 50 5 5 40 10 5 30 45 50 35 10 50 60 40 25 0 0 10 0 15 0 35 5 5 5 5 40 25 30 35 30 40 20 35 60 30 20 40 5 25 20 5 0 10 0 0 0 0 0 0 30 25 45 55 20 30 40 10 5 45 40 5 50 5 35 45 0 0 50 35 0 15 50 45 15 40 30 55 50 30 65 45 30 60 15 20 0 10 0 0 5 5 0 0 35 35 0 55 55 30 30 40 40 15 25 50 25 0 20 55 20 0 35 60 45 60 40 50 25 10 40 5 0 35 35 0 0 55 55 80
