# Supplementary material for: AcconPred: Predicting Solvent Accessibility and Contact Number Simultaneously by a Multitask Learning Framework under the Conditional Neural Fields Model
Source: Biomed Res Int. 2015 Aug 3;2015:678764. doi: 10.1155/2015/678764 (PMC4538422; doi:10.1155/2015/678764)
Supplement: Supplementary file 1 — Training/testing dataset as well as the CASP11 evaluation dataset could be found in the Supplementary Material. The CASP11 evaluation dataset contains all detailed results from SPINE-X, SANN, ACCpro5 and AcconPred. [file 678764.f1.zip › Supplmentary_Files/105_casp11_domain/casp11_domain_AccPro5/T0833-D1.reso]

>T0833-D1
85 65 25 10 25 35 25 55 55 55 45 25 45 10 25 15 25 5 0 5 0 20 40 40 35 30 15 45 55 40 5 40 15 30 5 25 15 40 45 50 30 50 20 20 40 45 40 0 15 35 10 40 45 45 50 55 50 15 10 25 5 10 20 10 30 10 40 15 40 40 55 60 55 50 10 45 35 35 15 25 20 15 45 50 45 55 55 45 10 50 20 40 45 35 30 10 40 5 25 20 40 40 15 55 40 25 30 90
