# Supplementary material for: AcconPred: Predicting Solvent Accessibility and Contact Number Simultaneously by a Multitask Learning Framework under the Conditional Neural Fields Model
Source: Biomed Res Int. 2015 Aug 3;2015:678764. doi: 10.1155/2015/678764 (PMC4538422; doi:10.1155/2015/678764)
Supplement: Supplementary file 1 — Training/testing dataset as well as the CASP11 evaluation dataset could be found in the Supplementary Material. The CASP11 evaluation dataset contains all detailed results from SPINE-X, SANN, ACCpro5 and AcconPred. [file 678764.f1.zip › Supplmentary_Files/105_casp11_domain/casp11_domain_AccPro5/T0834-D1.reso]

>T0834-D1
95 40 55 60 35 5 35 5 0 0 10 5 5 30 15 35 35 30 35 30 35 15 30 5 35 20 5 25 35 40 5 35 15 15 15 0 40 45 25 40 50 55 60 60 50 50 0 10 45 25 0 40 50 10 50 50 45 0 0 25 0 0 10 10 0 0 20 5 5 10 45 45 45 30 5 5 0 25 40 25 30 25 5 20 0 5 25 45 40 10 5 20 50 20 0 50 65 55 95
