# Supplementary material for: AcconPred: Predicting Solvent Accessibility and Contact Number Simultaneously by a Multitask Learning Framework under the Conditional Neural Fields Model
Source: Biomed Res Int. 2015 Aug 3;2015:678764. doi: 10.1155/2015/678764 (PMC4538422; doi:10.1155/2015/678764)
Supplement: Supplementary file 1 — Training/testing dataset as well as the CASP11 evaluation dataset could be found in the Supplementary Material. The CASP11 evaluation dataset contains all detailed results from SPINE-X, SANN, ACCpro5 and AcconPred. [file 678764.f1.zip › Supplmentary_Files/105_casp11_domain/casp11_domain_AccPro5/T0834-D2.reso]

>T0834-D2
85 60 60 50 35 20 45 50 40 40 60 20 45 20 55 35 0 50 40 0 15 55 20 5 55 60 10 30 45 25 15 35 35 25 10 15 5 5 25 5 10 5 50 45 35 55 15 30 25 35 10 0 5 25 15 30 10 5 20 30 30 30 20 30 15 0 5 35 10 0 45 50 10 35 60 30 20 55 50 0 25 50 15 25 50 60
