# Supplementary material for: AcconPred: Predicting Solvent Accessibility and Contact Number Simultaneously by a Multitask Learning Framework under the Conditional Neural Fields Model
Source: Biomed Res Int. 2015 Aug 3;2015:678764. doi: 10.1155/2015/678764 (PMC4538422; doi:10.1155/2015/678764)
Supplement: Supplementary file 1 — Training/testing dataset as well as the CASP11 evaluation dataset could be found in the Supplementary Material. The CASP11 evaluation dataset contains all detailed results from SPINE-X, SANN, ACCpro5 and AcconPred. [file 678764.f1.zip › Supplmentary_Files/105_casp11_domain/casp11_domain_AccPro5/T0835-D1.reso]

>T0835-D1
80 60 15 35 10 50 10 0 40 35 0 15 45 40 5 30 5 20 40 30 20 40 15 20 0 5 5 5 10 10 45 25 35 45 20 40 30 5 50 40 45 45 45 15 15 5 0 0 5 0 0 0 10 0 0 0 0 0 0 5 0 5 35 25 30 55 40 55 45 5 15 45 5 0 30 20 0 0 30 0 0 15 15 0 15 35 55 50 30 25 0 15 0 0 0 10 15 25 30 40 10 25 55 55 20 45 50 55 35 50 40 35 30 15 5 0 0 0 0 0 0 0 0 0 10 0 0 10 15 10 40 35 35 25 35 25 0 5 25 15 0 15 35 5 0 15 30 0 5 45 25 5 35 45 25 20 30 20 35 15 10 15 15 15 5 25 10 15 20 0 25 35 10 5 20 25 35 15 10 25 0 0 0 0 0 0 0 0 0 0 15 0 15 45 20 40 50 45 50 25 0 25 45 0 0 40 40 0 0 45 30 0 5 25 15 15 25 45 45 40 50 35 15 10 10 35 15 5 5 20 5 20 10 10 15 15 15 10 5 5 10 0 0 10 0 0 0 10 0 0 30 15 5 50 40 50 40 0 10 40 10 0 15 40 0 0 40 15 0 10 35 15 0 0 30 45 40 15 5 30 30 5 15 10 30 30 45 25 20 20 25 50 50 50 45 35 45 35 5 35 35 5 0 5 10 0 5 0 0 0 5 0 0 0 25 0 0 40 10 10 55 40 50 35 0 15 45 15 0 25 25 0 0 15 0 0 10 5 35 15 40 15 45 10 10 0 5 10 25 45 30 15 20 0 10 5 5 0 30 40 50 30 35 5 15 30 25 20 20 0 20 0 0 0 0 0 0 0 0 5 5 10 0 40 50 10 40 55 35 35 35 20 25 35 30 45 40 55 45 45 45 20 65 80
