# Supplementary material for: AcconPred: Predicting Solvent Accessibility and Contact Number Simultaneously by a Multitask Learning Framework under the Conditional Neural Fields Model
Source: Biomed Res Int. 2015 Aug 3;2015:678764. doi: 10.1155/2015/678764 (PMC4538422; doi:10.1155/2015/678764)
Supplement: Supplementary file 1 — Training/testing dataset as well as the CASP11 evaluation dataset could be found in the Supplementary Material. The CASP11 evaluation dataset contains all detailed results from SPINE-X, SANN, ACCpro5 and AcconPred. [file 678764.f1.zip › Supplmentary_Files/105_casp11_domain/casp11_domain_AccPro5/T0836-D1.reso]

>T0836-D1
85 65 60 25 10 60 45 10 40 15 20 0 5 0 5 10 10 15 5 5 10 10 5 10 10 20 20 25 30 20 45 45 20 30 25 30 15 10 25 5 0 5 20 10 10 15 10 15 20 15 15 20 20 20 15 15 20 15 10 5 10 5 10 25 15 45 30 20 55 55 25 60 65 65 35 40 35 50 15 10 50 50 25 0 20 40 5 0 10 5 0 15 10 15 0 5 0 0 0 0 5 0 5 5 0 0 5 15 20 10 15 15 10 15 10 5 10 5 5 5 15 30 35 25 15 30 25 15 20 15 5 0 0 5 0 10 5 5 5 15 10 5 5 10 10 10 10 10 0 10 5 0 0 5 20 30 5 35 30 0 5 25 0 15 55 50 60 60 65 60 40 40 55 10 20 40 25 0 25 0 20 15 25 20 15 10 10 5 10 5 10 5 5 5 5 5 5 10 10 30 30 25 40 90
