# Supplementary material for: AcconPred: Predicting Solvent Accessibility and Contact Number Simultaneously by a Multitask Learning Framework under the Conditional Neural Fields Model
Source: Biomed Res Int. 2015 Aug 3;2015:678764. doi: 10.1155/2015/678764 (PMC4538422; doi:10.1155/2015/678764)
Supplement: Supplementary file 1 — Training/testing dataset as well as the CASP11 evaluation dataset could be found in the Supplementary Material. The CASP11 evaluation dataset contains all detailed results from SPINE-X, SANN, ACCpro5 and AcconPred. [file 678764.f1.zip › Supplmentary_Files/105_casp11_domain/casp11_domain_AccPro5/T0837-D1.reso]

>T0837-D1
95 65 25 40 50 0 5 50 40 0 25 60 25 5 55 5 45 15 0 20 0 10 10 0 0 45 50 15 20 60 50 15 0 50 35 0 5 35 15 5 25 45 50 45 45 55 25 0 40 50 0 0 15 0 0 0 0 5 5 5 5 5 35 35 55 40 50 50 10 5 30 25 0 20 40 5 0 25 30 0 35 5 15 15 40 5 5 45 45 5 0 35 10 0 5 15 5 0 35 40 10 35 45 45 10 40 35 5 35 45 0 25 45 35 5 40 35 45 25 60 90
