# Supplementary material for: AcconPred: Predicting Solvent Accessibility and Contact Number Simultaneously by a Multitask Learning Framework under the Conditional Neural Fields Model
Source: Biomed Res Int. 2015 Aug 3;2015:678764. doi: 10.1155/2015/678764 (PMC4538422; doi:10.1155/2015/678764)
Supplement: Supplementary file 1 — Training/testing dataset as well as the CASP11 evaluation dataset could be found in the Supplementary Material. The CASP11 evaluation dataset contains all detailed results from SPINE-X, SANN, ACCpro5 and AcconPred. [file 678764.f1.zip › Supplmentary_Files/105_casp11_domain/casp11_domain_AccPro5/T0838-D1.reso]

>T0838-D1
85 60 30 25 5 30 10 55 20 40 55 30 10 20 10 35 50 30 35 55 35 15 5 10 5 30 30 25 35 5 10 0 0 0 25 15 5 45 40 55 45 15 40 45 45 50 0 45 55 35 0 50 55 20 30 60 50 50 60 15 55 55 35 40 55 15 40 50 15 45 10 25 40 10 15 15 15 35 5 55 40 50 10 50 40 35 40 0 0 0 0 0 0 0 15 45 45 45 40 25 10 0 5 0 0 0 0 15 15 50 55 40 55 45 10 35 50 50 5 15 50 40 10 45 50 85
