# Supplementary material for: AcconPred: Predicting Solvent Accessibility and Contact Number Simultaneously by a Multitask Learning Framework under the Conditional Neural Fields Model
Source: Biomed Res Int. 2015 Aug 3;2015:678764. doi: 10.1155/2015/678764 (PMC4538422; doi:10.1155/2015/678764)
Supplement: Supplementary file 1 — Training/testing dataset as well as the CASP11 evaluation dataset could be found in the Supplementary Material. The CASP11 evaluation dataset contains all detailed results from SPINE-X, SANN, ACCpro5 and AcconPred. [file 678764.f1.zip › Supplmentary_Files/105_casp11_domain/casp11_domain_AccPro5/T0840-D1.reso]

>T0840-D1
50 55 45 5 40 55 65 45 40 15 20 15 5 0 0 0 10 20 30 60 55 40 35 20 0 0 0 0 0 15 15 10 0 5 25 0 20 45 50 5 40 25 20 30 40 15 35 35 20 35 40 45 35 45 60 20 35 45 35 45 40 10 40 55 45 50 55 55 40 35 30 40 5 5 0 10 0 0 0 0 20 40 45 35 35 20 0 0 0 0 0 10 5 15 25 15 20 0 25 10 15 35 5 40 45 15 35 35 25 20 30 25 40 45 50 40 20 20 20 20 25 40 25 50 40 45 40 25 10 10 20 0 0 10 10 15 25 20 30 25 10 20 10 10 15 25 25 30 20 10 5 0 0 0 0 0 5 10 30 25 40 25 30 30 30 10 15 10 30 10 5 15 15 25 35 10 40 40 40 35 30 25 15 35 30 40 15 10 30 10 25 10 20 30 50 25 25 35 45 15 30 10 25 5 0 10 0 5 30 20 35 20 5 0 0 0 0 0 10 20 25 40 45 35 40 45 40 50 40 25 5 10 0 15 0 5 10 0 0 40 45 25 55 50 5 25 20 10 10 30 5 25 0 35 5 35 15 30 40 40 20 40 25 25 30 30 35 50 45 45 20 25 5 20 5 0 5 0 0 15 5 5 40 20 25 30 30 5 5 40 30 10 30 20 40 45 50 30 30 0 0 0 0 0 0 5 30 25 45 55 50 40 30 50 25 0 0 0 0 0 0 15 0 40 30 0 30 45 20 0 45 50 20 15 40 40 10 25 50 45 45 25 45 35 35 25 35 40 40 25 30 25 20 35 30 35 25 20 5 25 35 25 25 30 20 35 30 25 35 25 35 15 25 5 30 35 15 30 20 25 15 25 40 25 5 25 15 10 35 15 10 15 20 20 25 25 35 5 15 0 0 0 0 0 0 10 20 25 45 30 10 0 0 0 0 0 0 0 25 25 15 15 0 5 5 10 15 10 30 40 40 40 40 20 15 15 15 10 30 25 10 25 20 20 50 55 40 30 30 5 20 20 30 5 25 40 50 40 30 10 0 0 0 0 5 25 30 30 0 15 40 5 40 10 40 25 20 40 5 40 40 20 35 35 0 30 40 0 5 30 15 45 35 35 20 25 0 0 5 5 35 45 40 5 25 40 35 55 50 5 55 60 40 35 50 55 55 50 40
