# Supplementary material for: AcconPred: Predicting Solvent Accessibility and Contact Number Simultaneously by a Multitask Learning Framework under the Conditional Neural Fields Model
Source: Biomed Res Int. 2015 Aug 3;2015:678764. doi: 10.1155/2015/678764 (PMC4538422; doi:10.1155/2015/678764)
Supplement: Supplementary file 1 — Training/testing dataset as well as the CASP11 evaluation dataset could be found in the Supplementary Material. The CASP11 evaluation dataset contains all detailed results from SPINE-X, SANN, ACCpro5 and AcconPred. [file 678764.f1.zip › Supplmentary_Files/105_casp11_domain/casp11_domain_AccPro5/T0840-D2.reso]

>T0840-D2
85 70 55 15 35 55 15 25 30 50 40 30 40 40 35 20 40 0 25 0 5 10 15 35 5 35 25 35 30 60 30 35 30 40 5 25 15 35 45 35 30 5 45 20 15 45 15 5 45 40 0 30 5 40 5 40 45 55 40 45 45 35 50 0 25 0 20 0 30 55 40 55 60 50 50 30 0 25 0 35 5 20 20 25 10 40 15 5 20 20 30 70
