# Supplementary material for: AcconPred: Predicting Solvent Accessibility and Contact Number Simultaneously by a Multitask Learning Framework under the Conditional Neural Fields Model
Source: Biomed Res Int. 2015 Aug 3;2015:678764. doi: 10.1155/2015/678764 (PMC4538422; doi:10.1155/2015/678764)
Supplement: Supplementary file 1 — Training/testing dataset as well as the CASP11 evaluation dataset could be found in the Supplementary Material. The CASP11 evaluation dataset contains all detailed results from SPINE-X, SANN, ACCpro5 and AcconPred. [file 678764.f1.zip › Supplmentary_Files/105_casp11_domain/casp11_domain_AccPro5/T0841-D1.reso]

>T0841-D1
85 20 45 55 45 40 45 50 30 50 45 50 50 35 40 25 20 0 0 45 20 55 65 15 55 0 5 -5 0 -5 0 0 0 15 45 65 30 55 10 25 0 0 -5 -5 -5 5 50 30 30 5 -5 -5 -5 -5 30 40 10 5 75 30 25 90 10 65 15 75 50 15 20 -5 5 0 10 5 35 50 15 65 30 90 15 10 10 35 0 20 5 45 50 10 20 20 20 35 95 55 0 15 0 -5 -5 0 30 0 65 50 40 5 60 45 45 45 35 -5 15 10 0 5 20 0 60 40 70 25 60 0 40 60 45 15 60 0 10 0 0 0 0 50 15 0 0 0 5 45 0 15 0 5 30 10 75 55 -5 15 70 55 10 80 60 50 5 65 75 15 10 0 -5 -5 45 15 20 80 55 50 15 5 15 0 20 20 0 20 -5 -5 0 -5 0 -5 50 10 75 95 30 15 5 -5 0 -5 -5 0 0 30 30 40 35 20 15 60 35 55 10 5 20 5 0 -5 5 -5 -5 20 10 0 40 15 -5 55 75 25 30 55 65
