# Supplementary material for: AcconPred: Predicting Solvent Accessibility and Contact Number Simultaneously by a Multitask Learning Framework under the Conditional Neural Fields Model
Source: Biomed Res Int. 2015 Aug 3;2015:678764. doi: 10.1155/2015/678764 (PMC4538422; doi:10.1155/2015/678764)
Supplement: Supplementary file 1 — Training/testing dataset as well as the CASP11 evaluation dataset could be found in the Supplementary Material. The CASP11 evaluation dataset contains all detailed results from SPINE-X, SANN, ACCpro5 and AcconPred. [file 678764.f1.zip › Supplmentary_Files/105_casp11_domain/casp11_domain_AccPro5/T0843-D1.reso]

>T0843-D1
80 30 5 35 15 10 35 30 35 10 40 55 50 10 15 50 20 0 25 45 0 0 45 35 40 20 5 15 40 20 55 30 0 40 40 0 10 50 35 0 15 50 20 5 55 10 40 15 0 0 0 0 0 5 0 5 5 0 0 5 0 0 0 15 0 0 40 10 35 55 55 45 30 20 0 0 0 0 0 5 0 0 0 0 0 0 5 0 0 5 10 5 30 0 25 0 5 0 0 5 0 25 50 40 20 5 15 0 15 5 50 30 0 30 50 30 0 35 60 40 0 25 0 0 0 0 0 0 0 5 0 10 5 0 25 0 40 30 0 20 45 0 0 50 45 30 40 35 45 35 35 20 25 0 10 0 0 5 0 0 0 15 5 10 5 0 35 15 50 40 35 40 5 0 15 5 0 5 0 0 0 0 0 0 15 5 35 35 5 0 0 0 10 0 0 0 0 0 0 25 15 45 40 0 5 45 15 0 30 20 0 15 35 15 15 20 40 40 40 45 55 45 30 40 30 40 10 30 5 20 20 10 0 5 30 5 20 0 20 25 0 0 0 0 0 0 5 5 10 0 45 40 0 40 50 10 5 45 35 0 35 45 0 0 45 20 0 25 50 15 0 50 60 10 55 40 5 35 10 15 50 35 40 60 55 15 20 10 0 5 0 0 0 0 0 10 0 35 40 10 40 40 0 10 45 20 0 35 55 40 40 5 45 5 20 15 15 5 15 20 10 25 25 10 40 15 10 35 30 35 50 40 45 5 40 20 0 30 35 0 0 40 20 0 0 0 0 0 0 15 15 40 5 35 50 50 25 0 40 30 0 0 45 15 0 35 50 20 50
