# Supplementary material for: AcconPred: Predicting Solvent Accessibility and Contact Number Simultaneously by a Multitask Learning Framework under the Conditional Neural Fields Model
Source: Biomed Res Int. 2015 Aug 3;2015:678764. doi: 10.1155/2015/678764 (PMC4538422; doi:10.1155/2015/678764)
Supplement: Supplementary file 1 — Training/testing dataset as well as the CASP11 evaluation dataset could be found in the Supplementary Material. The CASP11 evaluation dataset contains all detailed results from SPINE-X, SANN, ACCpro5 and AcconPred. [file 678764.f1.zip › Supplmentary_Files/105_casp11_domain/casp11_domain_AccPro5/T0845-D1.reso]

>T0845-D1
90 60 15 50 45 20 35 15 35 35 10 40 40 10 30 45 20 10 55 35 45 15 40 40 40 35 30 5 25 45 10 35 45 30 5 50 10 15 40 50 15 20 45 50 50 40 20 30 10 15 10 5 10 40 30 55 50 20 35 50 50 30 45 10 35 20 50 15 50 40 45 10 45 45 40 0 35 5 15 5 45 45 50 25 40 50 20 45 25 30 40 45 15 45 55 70 90
