# Supplementary material for: AcconPred: Predicting Solvent Accessibility and Contact Number Simultaneously by a Multitask Learning Framework under the Conditional Neural Fields Model
Source: Biomed Res Int. 2015 Aug 3;2015:678764. doi: 10.1155/2015/678764 (PMC4538422; doi:10.1155/2015/678764)
Supplement: Supplementary file 1 — Training/testing dataset as well as the CASP11 evaluation dataset could be found in the Supplementary Material. The CASP11 evaluation dataset contains all detailed results from SPINE-X, SANN, ACCpro5 and AcconPred. [file 678764.f1.zip › Supplmentary_Files/105_casp11_domain/casp11_domain_AccPro5/T0845-D2.reso]

>T0845-D2
80 25 45 45 15 10 5 10 10 35 40 15 35 0 15 0 10 45 15 45 50 45 10 0 20 20 15 0 5 40 40 35 25 20 40 50 45 5 15 10 25 25 20 15 5 10 5 0 0 0 5 15 5 15 0 0 0 0 0 30 25 15 15 60 60 50 25 20 0 0 0 0 0 0 50 10 0 30 25 35 10 25 0 30 40 0 10 45 20 30 0 10 0 0 0 20 15 20 15 0 0 0 0 5 25 5 0 10 15 0 15 0 45 10 0 30 10 0 15 5 25 15 40 50 5 15 0 20 10 10 10 0 10 10 0 0 40 5 0 15 5 20 15 10 45 30 30 25 45 5 20 0 5 0 0 0 5 0 0 0 0 25 40 10 35 30 10 0 0 20 20 0 35 15 5 10 35 30 35 0 15 0 0 5 0 35 25 5 5 0 5 0 5 25 30 5 60 45 20 45 25 0 20 35 0 40 20 40 5 10 15 40 35 0 40 5 50 20 25 10 15 40 20 25 5 20 25 20 10 10 10 10 0 10 5 20 40 20 30 5 0 0 0 0 0 5 25 40 30 45 0 5 20 5 0 10 10 25 40 45 35 10 55 35 15 0 5 20 5 55 35 35 10 30 5 35 5 30 15 35 10 35 45 40 30 30 40 5 15 0 30 15 30 50 50 35 50 55 45 25 40 5 10 0 15 20 55 50 35 50 15 15 25 30 10 40 10 45 55 50 20 40 40 40 10 20 30 65 90
