# Supplementary material for: AcconPred: Predicting Solvent Accessibility and Contact Number Simultaneously by a Multitask Learning Framework under the Conditional Neural Fields Model
Source: Biomed Res Int. 2015 Aug 3;2015:678764. doi: 10.1155/2015/678764 (PMC4538422; doi:10.1155/2015/678764)
Supplement: Supplementary file 1 — Training/testing dataset as well as the CASP11 evaluation dataset could be found in the Supplementary Material. The CASP11 evaluation dataset contains all detailed results from SPINE-X, SANN, ACCpro5 and AcconPred. [file 678764.f1.zip › Supplmentary_Files/105_casp11_domain/casp11_domain_AccPro5/T0847-D1.reso]

>T0847-D1
85 25 40 5 20 10 30 40 55 65 50 60 35 0 40 50 10 0 30 45 10 0 50 50 0 35 40 0 0 0 0 0 0 5 15 5 10 10 10 35 0 0 30 30 0 5 45 15 0 25 50 25 45 5 10 0 0 0 0 0 15 35 45 20 0 50 20 0 5 40 5 0 40 45 0 45 5 20 25 40 25 5 45 20 0 20 0 10 10 0 40 25 30 30 5 10 0 35 25 15 40 45 5 40 30 35 5 30 30 25 0 0 0 0 5 0 20 25 0 0 10 10 15 20 5 0 0 5 10 15 30 30 0 15 20 5 0 0 5 5 0 25 5 40 5 5 40 30 0 30 50 25 0 20 30 0 10 10 30 25 45 55 15 50 40 30 55 40 85
