# Supplementary material for: AcconPred: Predicting Solvent Accessibility and Contact Number Simultaneously by a Multitask Learning Framework under the Conditional Neural Fields Model
Source: Biomed Res Int. 2015 Aug 3;2015:678764. doi: 10.1155/2015/678764 (PMC4538422; doi:10.1155/2015/678764)
Supplement: Supplementary file 1 — Training/testing dataset as well as the CASP11 evaluation dataset could be found in the Supplementary Material. The CASP11 evaluation dataset contains all detailed results from SPINE-X, SANN, ACCpro5 and AcconPred. [file 678764.f1.zip › Supplmentary_Files/105_casp11_domain/casp11_domain_AccPro5/T0848-D1.reso]

>T0848-D1
95 70 60 55 65 60 30 55 45 0 40 5 30 0 40 40 10 40 15 15 5 30 50 55 30 40 50 55 25 40 55 40 50 25 0 0 35 0 40 0 15 0 45 35 55 45 60 45 15 5 45 5 30 50 25 25 0 20 5 10 35 60 25 55 45 10 45 55 15 35 50 40 30 25 55 50 35 0 40 20 10 40 5 45 60 60 45 60 20 45 5 15 0 5 0 15 0 45 50 25 45 50 5 30 5 35 10 30 55 50 25 25 55 65 60 55 60 50 50 25 40 0 40 5 50 20 55 30 55 45 0 20 55 45 0 60 70 75
