# Supplementary material for: AcconPred: Predicting Solvent Accessibility and Contact Number Simultaneously by a Multitask Learning Framework under the Conditional Neural Fields Model
Source: Biomed Res Int. 2015 Aug 3;2015:678764. doi: 10.1155/2015/678764 (PMC4538422; doi:10.1155/2015/678764)
Supplement: Supplementary file 1 — Training/testing dataset as well as the CASP11 evaluation dataset could be found in the Supplementary Material. The CASP11 evaluation dataset contains all detailed results from SPINE-X, SANN, ACCpro5 and AcconPred. [file 678764.f1.zip › Supplmentary_Files/105_casp11_domain/casp11_domain_AccPro5/T0848-D2.reso]

>T0848-D2
90 55 25 55 55 0 0 45 15 5 0 10 0 0 0 5 20 40 50 25 55 45 0 45 50 5 25 50 60 50 50 60 45 5 20 55 40 0 35 55 40 0 40 55 25 0 30 30 20 20 25 15 25 35 50 40 5 35 50 50 40 0 35 50 0 5 50 40 0 35 55 20 10 45 55 45 10 50 5 40 15 50 20 45 50 30 55 65 60 45 15 40 0 30 0 45 5 40 20 10 30 10 45 50 0 35 55 40 0 40 55 40 0 35 55 25 0 50 65 50 55 40 10 45 35 55 40 0 10 45 45 0 0 40 5 0 5 55 25 0 45 55 5 45 40 30 50 45 65 50 35 10 35 0 35 5 40 55 50 65 60 55 40 5 30 0 25 15 45 40 35 35 0 45 45 5 0 50 40 0 20 60 80
