# Supplementary material for: AcconPred: Predicting Solvent Accessibility and Contact Number Simultaneously by a Multitask Learning Framework under the Conditional Neural Fields Model
Source: Biomed Res Int. 2015 Aug 3;2015:678764. doi: 10.1155/2015/678764 (PMC4538422; doi:10.1155/2015/678764)
Supplement: Supplementary file 1 — Training/testing dataset as well as the CASP11 evaluation dataset could be found in the Supplementary Material. The CASP11 evaluation dataset contains all detailed results from SPINE-X, SANN, ACCpro5 and AcconPred. [file 678764.f1.zip › Supplmentary_Files/105_casp11_domain/casp11_domain_AccPro5/T0849-D1.reso]

>T0849-D1
85 60 50 55 10 30 0 10 5 0 30 0 30 0 15 0 10 0 0 5 0 0 0 15 15 15 60 15 50 5 35 30 35 25 5 40 30 55 50 10 45 55 30 40 60 50 50 50 55 10 25 5 25 20 0 5 0 0 25 20 40 45 40 30 0 0 5 0 5 0 0 0 10 5 0 0 35 25 5 25 25 5 25 45 55 40 45 30 20 15 0 15 0 15 5 0 0 30 5 0 25 40 10 0 30 40 10 0 20 20 0 5 25 40 40 45 50 45 50 50 50 35 10 40 50 25 15 55 50 30 20 50 40 0 30 45 5 5 45 30 0 35 55 30 35 65 60 40 20 5 0 0 5 25 30 0 0 0 0 0 0 0 0 0 0 0 0 20 5 0 20 20 5 15 40 50 45 50 35 55 35 5 15 50 50 10 45 35 0 35 45 0 15 50 35 0 40 55 20 45 45 0 35 50 10 0 55 60 20 45 55 30 15 55 55 35 25 30 35 25 45 5 0 45 25 0 40 55 5 35 15 10 20 45 40 90
