# Supplementary material for: AcconPred: Predicting Solvent Accessibility and Contact Number Simultaneously by a Multitask Learning Framework under the Conditional Neural Fields Model
Source: Biomed Res Int. 2015 Aug 3;2015:678764. doi: 10.1155/2015/678764 (PMC4538422; doi:10.1155/2015/678764)
Supplement: Supplementary file 1 — Training/testing dataset as well as the CASP11 evaluation dataset could be found in the Supplementary Material. The CASP11 evaluation dataset contains all detailed results from SPINE-X, SANN, ACCpro5 and AcconPred. [file 678764.f1.zip › Supplmentary_Files/105_casp11_domain/casp11_domain_AccPro5/T0851-D1.reso]

>T0851-D1
85 65 40 15 45 35 15 50 55 50 45 55 5 25 0 0 0 0 0 0 0 10 0 0 0 0 0 0 0 0 0 0 40 35 45 15 35 0 0 0 0 5 15 25 40 50 20 0 45 35 0 40 60 50 40 20 40 10 35 25 45 40 5 35 45 5 0 40 45 10 10 50 40 25 25 0 30 5 15 30 30 20 35 20 0 30 35 0 20 0 0 0 0 0 0 30 5 25 20 45 55 55 50 35 25 15 5 25 10 0 20 30 0 0 40 30 0 10 50 20 15 35 55 30 20 5 0 0 0 15 0 15 0 20 5 20 5 0 30 30 0 10 35 20 15 15 40 40 35 30 30 45 35 40 30 25 0 0 0 0 0 0 0 5 10 5 25 45 20 25 10 10 15 30 0 25 20 10 25 10 0 0 0 5 15 20 40 40 0 0 40 20 0 20 40 15 5 35 40 10 20 45 40 45 15 25 25 10 25 25 5 30 10 0 20 0 0 30 0 0 20 5 0 5 10 0 0 10 0 0 0 0 5 5 0 5 25 0 0 40 45 20 50 10 30 0 25 25 0 0 35 0 0 25 35 25 35 35 10 15 20 15 10 25 5 0 15 15 10 5 10 5 20 10 25 20 0 20 35 5 0 10 5 0 5 15 10 0 40 25 20 45 10 35 10 10 0 0 25 5 0 20 35 15 20 40 40 10 30 35 20 5 0 30 10 0 10 35 15 0 30 50 25 35 30 45 30 25 25 10 10 0 0 0 0 0 5 0 5 30 35 45 15 50 25 5 20 35 5 10 0 5 25 0 0 40 20 0 25 55 35 30 20 35 0 15 5 10 10 30 20 5 25 45 35 35 20 30 30 35 25 45 10 35 20 5 45 30 5 30 45 5 5 40 35 0 10 0 0 0 0 0 0 30 10 45 35 5 35 50 15 35 15 50 35 0 25 50 25 5 50 50 35 15 0 0 0 0 0 20 25 10 5 35 50 45 35 10 45 50 5 35 55 35 30 5 25 5 20 10 10 30 70
