# Supplementary material for: AcconPred: Predicting Solvent Accessibility and Contact Number Simultaneously by a Multitask Learning Framework under the Conditional Neural Fields Model
Source: Biomed Res Int. 2015 Aug 3;2015:678764. doi: 10.1155/2015/678764 (PMC4538422; doi:10.1155/2015/678764)
Supplement: Supplementary file 1 — Training/testing dataset as well as the CASP11 evaluation dataset could be found in the Supplementary Material. The CASP11 evaluation dataset contains all detailed results from SPINE-X, SANN, ACCpro5 and AcconPred. [file 678764.f1.zip › Supplmentary_Files/105_casp11_domain/casp11_domain_AccPro5/T0852-D1.reso]

>T0852-D1
70 35 35 45 50 40 5 40 20 55 30 10 55 50 50 15 40 0 15 0 20 0 10 60 55 15 50 60 60 50 55 5 0 0 0 0 0 0 0 0 30 25 15 0 30 15 0 5 10 0 0 35 15 0 20 45 20 55 50 5 25 25 0 0 0 0 0 0 15 20 35 40 35 45 45 15 40 20 45 60 50 50 55 20 50 45 55 50 0 35 35 0 5 40 5 0 25 50 25 0 15 35 15 0 30 55 45 5 40 15 30 55 15 15 0 0 0 0 5 5 5 0 0 0 0 0 0 0 0 0 0 20 45 35 35 50 5 0 15 5 0 0 0 0 0 0 10 0 15 35 35 10 20 45 30 0 35 50 30 10 50 55 45 25 55 40 35 0 0 0 0 0 0 10 25 50 50 50 25 50 35 5 20 45 25 0 35 40 0 20 50 20 0 40 50 30 55 45 50 55 40 0 35 5 25 10 40 35 10 55 60 40 40 15 15 15 0 10 0 20 0 0 10 35 0 0 30 25 0 5 50 35 20 75
