# Supplementary material for: AcconPred: Predicting Solvent Accessibility and Contact Number Simultaneously by a Multitask Learning Framework under the Conditional Neural Fields Model
Source: Biomed Res Int. 2015 Aug 3;2015:678764. doi: 10.1155/2015/678764 (PMC4538422; doi:10.1155/2015/678764)
Supplement: Supplementary file 1 — Training/testing dataset as well as the CASP11 evaluation dataset could be found in the Supplementary Material. The CASP11 evaluation dataset contains all detailed results from SPINE-X, SANN, ACCpro5 and AcconPred. [file 678764.f1.zip › Supplmentary_Files/105_casp11_domain/casp11_domain_AccPro5/T0852-D2.reso]

>T0852-D2
90 50 40 55 60 40 5 40 55 40 0 20 55 20 55 55 35 10 15 45 15 0 30 50 20 5 45 30 0 30 50 15 5 15 5 50 30 45 5 20 5 15 5 0 20 15 0 10 45 0 0 40 45 45 55 35 10 50 40 0 40 45 0 0 50 15 0 45 55 45 40 5 45 45 20 0 0 10 20 5 5 5 0 15 5 5 25 45 25 50 45 20 40 45 0 5 45 40 0 25 55 5 10 30 30 45 50 5 45 25 5 30 40 40 20 0 20 50 25 0 50 45 0 50 65 90
