# Supplementary material for: AcconPred: Predicting Solvent Accessibility and Contact Number Simultaneously by a Multitask Learning Framework under the Conditional Neural Fields Model
Source: Biomed Res Int. 2015 Aug 3;2015:678764. doi: 10.1155/2015/678764 (PMC4538422; doi:10.1155/2015/678764)
Supplement: Supplementary file 1 — Training/testing dataset as well as the CASP11 evaluation dataset could be found in the Supplementary Material. The CASP11 evaluation dataset contains all detailed results from SPINE-X, SANN, ACCpro5 and AcconPred. [file 678764.f1.zip › Supplmentary_Files/105_casp11_domain/casp11_domain_AccPro5/T0853-D1.reso]

>T0853-D1
80 55 55 35 40 10 15 55 45 0 40 40 25 5 10 25 15 35 5 5 25 20 30 45 45 40 50 5 50 0 15 5 10 25 55 50 55 45 30 30 55 10 25 10 35 30 35 45 40 50 35 20 15 35 25 55 15 40 5 55 45 0 40 45 5 35 15 50 50 50 45 15 40 60 60 90
