# Supplementary material for: AcconPred: Predicting Solvent Accessibility and Contact Number Simultaneously by a Multitask Learning Framework under the Conditional Neural Fields Model
Source: Biomed Res Int. 2015 Aug 3;2015:678764. doi: 10.1155/2015/678764 (PMC4538422; doi:10.1155/2015/678764)
Supplement: Supplementary file 1 — Training/testing dataset as well as the CASP11 evaluation dataset could be found in the Supplementary Material. The CASP11 evaluation dataset contains all detailed results from SPINE-X, SANN, ACCpro5 and AcconPred. [file 678764.f1.zip › Supplmentary_Files/105_casp11_domain/casp11_domain_AccPro5/T0853-D2.reso]

>T0853-D2
80 65 40 45 30 45 45 55 45 30 15 50 45 10 30 55 50 10 50 65 55 40 20 20 45 45 40 35 35 5 30 0 25 5 40 45 55 45 55 50 40 55 40 40 25 45 45 55 20 35 40 45 15 45 50 40 50 40 40 40 10 40 50 35 5 15 45 45 10 45 45 90
