# Supplementary material for: AcconPred: Predicting Solvent Accessibility and Contact Number Simultaneously by a Multitask Learning Framework under the Conditional Neural Fields Model
Source: Biomed Res Int. 2015 Aug 3;2015:678764. doi: 10.1155/2015/678764 (PMC4538422; doi:10.1155/2015/678764)
Supplement: Supplementary file 1 — Training/testing dataset as well as the CASP11 evaluation dataset could be found in the Supplementary Material. The CASP11 evaluation dataset contains all detailed results from SPINE-X, SANN, ACCpro5 and AcconPred. [file 678764.f1.zip › Supplmentary_Files/105_casp11_domain/casp11_domain_AccPro5/T0854-D1.reso]

>T0854-D1
75 40 35 30 20 10 5 35 45 40 15 10 50 25 15 35 20 20 60 35 0 30 45 0 0 50 35 0 40 60 45 0 30 0 0 0 0 0 15 35 45 45 30 0 30 45 5 0 45 40 10 40 0 35 45 10 0 20 0 0 0 0 10 40 40 15 50 50 50 35 40 25 15 40 0 0 15 30 0 0 45 40 5 55 15 40 40 45 15 0 0 0 0 5 10 10 45 20 5 5 35 0 0 40 45 10 45 0 30 0 0 0 5 30 35 55 20 55 10 30 15 15 0 45 30 10 50 40 0 25 60 55
