# Supplementary material for: AcconPred: Predicting Solvent Accessibility and Contact Number Simultaneously by a Multitask Learning Framework under the Conditional Neural Fields Model
Source: Biomed Res Int. 2015 Aug 3;2015:678764. doi: 10.1155/2015/678764 (PMC4538422; doi:10.1155/2015/678764)
Supplement: Supplementary file 1 — Training/testing dataset as well as the CASP11 evaluation dataset could be found in the Supplementary Material. The CASP11 evaluation dataset contains all detailed results from SPINE-X, SANN, ACCpro5 and AcconPred. [file 678764.f1.zip › Supplmentary_Files/105_casp11_domain/casp11_domain_AccPro5/T0854-D2.reso]

>T0854-D2
80 35 45 25 15 15 35 5 5 25 25 0 0 35 25 10 25 45 20 50 10 50 40 50 40 55 45 5 5 35 5 0 10 5 10 0 20 45 45 0 0 25 20 0 5 40 30 60 60 40 10 55 35 0 20 35 0 0 10 15 5 35 10 35 45 10 10 50 45 80
