# Supplementary material for: AcconPred: Predicting Solvent Accessibility and Contact Number Simultaneously by a Multitask Learning Framework under the Conditional Neural Fields Model
Source: Biomed Res Int. 2015 Aug 3;2015:678764. doi: 10.1155/2015/678764 (PMC4538422; doi:10.1155/2015/678764)
Supplement: Supplementary file 1 — Training/testing dataset as well as the CASP11 evaluation dataset could be found in the Supplementary Material. The CASP11 evaluation dataset contains all detailed results from SPINE-X, SANN, ACCpro5 and AcconPred. [file 678764.f1.zip › Supplmentary_Files/105_casp11_domain/casp11_domain_AccPro5/T0855-D1.reso]

>T0855-D1
70 50 40 45 25 0 0 0 0 0 0 5 15 5 30 20 50 10 5 35 35 30 10 5 5 25 5 0 0 5 5 10 10 35 25 50 50 55 20 25 25 25 15 40 35 15 5 5 0 0 0 25 45 55 45 60 45 0 0 0 0 0 25 5 50 60 50 45 0 20 0 30 5 20 50 45 45 55 55 45 5 40 30 35 55 5 25 5 40 40 0 35 60 40 15 10 35 25 45 55 30 45 60 45 5 45 60 15 5 45 55 5 45 65 90
