# Supplementary material for: AcconPred: Predicting Solvent Accessibility and Contact Number Simultaneously by a Multitask Learning Framework under the Conditional Neural Fields Model
Source: Biomed Res Int. 2015 Aug 3;2015:678764. doi: 10.1155/2015/678764 (PMC4538422; doi:10.1155/2015/678764)
Supplement: Supplementary file 1 — Training/testing dataset as well as the CASP11 evaluation dataset could be found in the Supplementary Material. The CASP11 evaluation dataset contains all detailed results from SPINE-X, SANN, ACCpro5 and AcconPred. [file 678764.f1.zip › Supplmentary_Files/105_casp11_domain/casp11_domain_AccPro5/T0856-D1.reso]

>T0856-D1
95 30 45 40 55 45 10 5 0 0 0 5 25 30 15 15 5 0 15 10 25 45 45 45 40 15 5 0 0 0 0 0 0 0 35 15 5 15 5 15 0 15 0 20 0 25 55 50 50 45 60 45 50 5 5 0 0 0 0 0 25 15 10 5 40 25 20 30 20 40 30 10 20 20 0 0 0 0 0 0 10 10 0 10 0 5 10 35 15 40 35 10 25 15 0 35 55 20 25 55 35 15 20 0 5 0 5 0 15 0 45 45 30 5 0 20 5 35 40 35 55 65 45 20 40 0 0 0 40 30 5 40 20 25 40 0 5 0 0 0 0 0 5 25 30 40 45 45 45 40 0 35 0 10 45 15 45 35 70
