# Supplementary material for: AcconPred: Predicting Solvent Accessibility and Contact Number Simultaneously by a Multitask Learning Framework under the Conditional Neural Fields Model
Source: Biomed Res Int. 2015 Aug 3;2015:678764. doi: 10.1155/2015/678764 (PMC4538422; doi:10.1155/2015/678764)
Supplement: Supplementary file 1 — Training/testing dataset as well as the CASP11 evaluation dataset could be found in the Supplementary Material. The CASP11 evaluation dataset contains all detailed results from SPINE-X, SANN, ACCpro5 and AcconPred. [file 678764.f1.zip › Supplmentary_Files/105_casp11_domain/casp11_domain_AccPro5/T0857-D1.reso]

>T0857-D1
85 50 40 15 10 5 15 15 25 45 45 40 40 40 35 35 50 30 25 55 50 30 40 30 15 20 5 5 0 20 0 30 30 15 50 55 45 45 55 30 35 50 20 10 35 15 40 25 40 35 35 15 10 0 20 0 35 30 30 35 15 35 20 50 55 35 35 45 55 45 30 30 35 25 35 10 35 10 50 45 55 55 45 55 45 60 5 30 10 45 10 40 40 65 65 90
