# Supplementary material for: AcconPred: Predicting Solvent Accessibility and Contact Number Simultaneously by a Multitask Learning Framework under the Conditional Neural Fields Model
Source: Biomed Res Int. 2015 Aug 3;2015:678764. doi: 10.1155/2015/678764 (PMC4538422; doi:10.1155/2015/678764)
Supplement: Supplementary file 1 — Training/testing dataset as well as the CASP11 evaluation dataset could be found in the Supplementary Material. The CASP11 evaluation dataset contains all detailed results from SPINE-X, SANN, ACCpro5 and AcconPred. [file 678764.f1.zip › Supplmentary_Files/105_casp11_domain/casp11_domain_AccPro5/T0858-D1.reso]

>T0858-D1
65 15 30 5 10 15 10 25 55 55 40 35 45 35 15 40 55 55 45 30 55 40 20 35 0 25 0 30 35 50 45 40 15 25 35 0 30 0 0 0 0 0 5 0 15 0 0 0 10 0 0 25 40 5 35 55 50 35 10 40 40 0 0 30 20 0 0 30 45 50 45 35 5 30 0 5 0 0 5 0 15 0 5 0 5 20 10 10 15 25 20 10 5 10 25 40 25 50 45 10 35 25 0 30 5 35 45 45 40 35 40 15 10 10 25 0 0 35 20 0 30 50 25 35 50 45 5 25 0 10 0 0 0 5 0 0 5 5 10 0 35 30 35 45 35 15 30 25 30 35 25 35 25 20 25 40 30 35 5 35 40 45 10 5 35 20 0 0 30 0 0 0 15 0 0 35 15 0 35 55 40 45 5 35 0 15 0 0 0 0 5 15 10 40 25 25 40 25 50 10 40 5 0 20 10 15 15 40 35 0 10 35 5 0 20 15 15 0 20 50 30 5 40 55 45 45 10 40 0 15 0 0 0 0 5 20 25 25 35 30 35 25 25 30 25 10 35 35 5 5 20 20 20 5 40 25 40 50 0 20 40 5 0 5 0 0 0 0 0 0 0 5 20 30 25 40 20 5 30 35 0 15 45 45 10 50 55 35 45 10 25 10 15 30 15 10 10 20 35 15 40 35 35 30 40 10 5 20 20 0 0 25 10 0 10 15 0 0 5 15 5 10 20 10 5 0 5 0 0 0 0 0 0 0 0 0 10 30 45 30 20 20 20 15 20 25 15 10 30 20 5 20 0 0 0 10 5 25 40 50 50 35 45 35 5 25 35 20 30 15 0 5 0 0 0 0 0 0 30 5 0 25 35 20 5 25 10 0 35 5 40 45 40 40 55 50 35 0 25 0 0 0 0 25 20 50 60 40 30 5 0 0 0 0 0 0 35 40 55 50 55 25 40 0 35 0 45 30 60 55 50 35 5 35 5 45 0 45 20 40 10 0 5 0 0 20 5 40 60 90
