# Supplementary material for: AcconPred: Predicting Solvent Accessibility and Contact Number Simultaneously by a Multitask Learning Framework under the Conditional Neural Fields Model
Source: Biomed Res Int. 2015 Aug 3;2015:678764. doi: 10.1155/2015/678764 (PMC4538422; doi:10.1155/2015/678764)
Supplement: Supplementary file 1 — Training/testing dataset as well as the CASP11 evaluation dataset could be found in the Supplementary Material. The CASP11 evaluation dataset contains all detailed results from SPINE-X, SANN, ACCpro5 and AcconPred. [file 678764.f1.zip › Supplmentary_Files/105_casp11_domain/README.txt]

================
CASP11 domains :
================

This folder contains the results for the solvent accessibility predicion on 105 CASP11 domains, from SPINE-X, SANN, AccPro5, and AcconPred, respectively.


---------------------
Part I: gold standard
---------------------

casp11_domain_tpl/  -> this folder contains the gold standard of the relative solvent accessibility for each CASP11 domain target.


------------------------------------
Part II: feature files for AcconPred
------------------------------------

casp11_domain_tgt/  -> this folder contains the feature files in TGT format for AcconPred. Each TGT file could be generated by 'Build_Node_Feature' package.


-----------------
Part III: results
-----------------

casp11_domain_SPINE-X/    -> this folder contains the result files from SPINE-X
casp11_domain_SANN/       -> this folder contains the result files from SANN
casp11_domain_AccPro5/    -> this folder contains the result files from AccPro5
casp11_domain_AcconPred/  -> this folder contains the result files from AcconPred

casp11_domain_result.xlsx -> this file contains the processed results from SPINE-X, SANN, AccPro5, and AcconPred.
